# Supplementary material for: Energy coupling and stoichiometry of Zn2+/H+ antiport by the prokaryotic cation diffusion facilitator YiiP
Source: eLife. 2023 Oct 31;12:RP87167. doi: 10.7554/eLife.87167 (PMC10617992; doi:10.7554/eLife.87167)
Supplement: Figure 2—figure supplement 2—source data 1. [file elife-87167-fig2-figsupp2-data1.xlsx]

## Sheet: WT_IFa
0	1.464
0.454	1.577
0.89	1.763
1.39	1.891
1.889	2.045
2.334	2.189
2.821	2.045
3.321	1.895
3.821	1.821
4.306	1.758
4.806	1.751
5.306	1.828
5.806	1.982
6.233	2.021
6.731	1.934
7.231	1.868
7.731	1.883
8.21	1.928
8.71	2.031
9.21	2.204
9.664	2.373
10.164	2.246
10.664	2.189
11.164	2.205
11.664	2.293
12.146	2.396
12.646	2.37
13.136	2.383
13.636	2.365
14.132	2.378

## Sheet: WT_IFb
0	1.428
0.5	1.583
0.999	1.807
1.499	1.978
1.881	2.045
2.381	2.002
2.881	2.037
3.381	2.147
3.881	2.326
4.358	2.306
4.858	2.203
5.356	2.124
5.853	2.111
6.353	2.112
6.853	2.18
7.353	2.316
7.776	2.382
8.275	2.282
8.775	2.219
9.275	2.228
9.775	2.309
10.256	2.316
10.748	2.221
11.248	2.127
11.748	2.106
12.248	2.161

## Sheet: D70A_IF
0	1.057
0.5	1.276
0.97	1.451
1.47	1.615
1.918	1.567
2.399	1.657
2.899	1.763
3.399	1.945
3.898	2.163
4.313	2.045
4.753	1.974
5.253	1.88
5.746	1.831
6.246	1.85
6.746	1.949
7.246	2.122
7.746	2.357
8.24	2.622
8.72	2.633

## Sheet: D70A_occl
0	1.285
0.49	1.229
0.989	1.19
1.489	1.239
1.986	1.333
2.486	1.497
2.91	1.588
3.41	1.565
3.91	1.631
4.391	1.726
4.886	1.791
5.386	1.659
5.885	1.474
6.366	1.278
6.866	1.056
7.366	0.93
7.866	0.918
8.366	1.021
8.852	1.202
9.273	1.185
9.771	1.109
10.271	1.111
10.771	1.218
11.271	1.417
11.735	1.503
12.223	1.515
12.708	1.457
13.181	1.333
13.662	1.197
14.162	1.151
14.637	1.199
15.137	1.314
15.599	1.429
16.099	1.474
16.599	1.61
17.099	1.823
17.486	1.889
17.986	1.888
18.483	1.902
18.972	1.876
19.456	1.772
19.923	1.667
20.423	1.641
20.923	1.704
21.336	1.669
21.791	1.537
22.291	1.44
22.79	1.418
23.29	1.44
23.786	1.402
24.277	1.397
24.776	1.261
25.276	1.195
25.776	1.232
26.256	1.344
26.751	1.389
27.251	1.508
27.718	1.6
28.218	1.528
28.718	1.546
29.218	1.654
29.704	1.713
30.204	1.81
30.703	1.972
31.187	2.178
31.687	2.241
32.109	2.303
32.609	2.252
33.109	2.273
33.574	2.218
34.074	2.058
