# Supplementary material for: Energy coupling and stoichiometry of Zn2+/H+ antiport by the prokaryotic cation diffusion facilitator YiiP
Source: eLife. 2023 Oct 31;12:RP87167. doi: 10.7554/eLife.87167 (PMC10617992; doi:10.7554/eLife.87167)
Supplement: Figure 3—source data 1. — RMSFs, and their standard deviations. TMD parts were calculated with alignment on TMD residue CA atoms, while CTD parts with alignment on CTD residue CA atoms. [file elife-87167-fig3-data1.csv]

resid	empty site B	empty siteB std	apo	apo std	holo	holo std
7	4.718917548158563	0.5379920192724301	4.6824458568186555	0.5597760530247873	4.377605327808005	0.7445672409905251
8	3.5760802880309868	0.6008383551413276	3.035327390695676	0.8119936322248253	3.019317498444927	0.8477530660329226
9	2.9267370738676326	0.4715383423553463	2.679295606431117	0.7524200232382106	2.676674160453331	0.7201506621833667
10	2.5529825811279334	0.42593324214986794	2.4463738766327996	0.7683198609293197	2.3000314924359127	0.6146088549276209
11	2.4067761667495855	0.3521896113523305	2.3031219355838055	0.6752012512117543	2.107168170648039	0.5652512029482967
12	2.148326828166599	0.3362133116304859	2.126550029474719	0.6109686163142021	1.9411727812937254	0.47463244971199614
13	1.9522487250206193	0.32056732005065997	2.033017418090139	0.5602879489943803	1.711218533255046	0.3367087912915476
14	1.7150575305480913	0.27068042266577697	1.8673174033297082	0.5748708056942983	1.51413192504927	0.31158937402283454
15	1.6556367863030894	0.2683880363621341	1.7006076197433548	0.4987579596681248	1.4242396800317996	0.31270473204555377
16	1.5920782504397026	0.2867680876121869	1.6752642303731602	0.4908015377161341	1.3866993009317194	0.30532694745726374
17	1.387783164826838	0.22365633474475272	1.6212509166511648	0.5322712472710598	1.2077681756700962	0.24197268404247882
18	1.2533136582638704	0.20819886719926975	1.5203664568627244	0.5811109423751317	1.0997756843151725	0.29804495652357244
19	1.2329097698132268	0.21109413818991463	1.4056431489050414	0.48109702223591205	1.108674208966318	0.2864710308154638
20	1.175119058244727	0.20604425351508146	1.3748746788552622	0.36703940548997294	1.0424828217111661	0.2085260619976517
21	0.9755294841981783	0.15756392569829064	1.277449563643262	0.34590012040161133	0.8662460316261068	0.16211363834604509
22	0.916227516888931	0.13657665495630533	1.1787707857388139	0.28862733599917545	0.8487705299012612	0.1801226776608503
23	0.9633794488181486	0.15274118657687377	1.1950707005619303	0.2184525214600046	0.8929672242749859	0.15146241804643726
24	0.8941848226685076	0.1364806496295081	1.1371784201514163	0.18283270039514143	0.8413600074018297	0.11794360017964099
25	0.7888526117872048	0.11519850277955498	0.9909150096627778	0.13728004332757285	0.7554347017231205	0.12419352028461125
26	0.7844957779827166	0.1125764315679181	0.9930085865566262	0.1016227899779614	0.7267823334697857	0.1102302590969027
27	0.8561573696093171	0.12923370665413686	1.0254431229750265	0.09908765626698861	0.7992847668462222	0.10196694767990497
28	0.7761140445670924	0.11680268736973846	0.945333835306781	0.11693708844243794	0.7522036299653991	0.09293349553125262
29	0.6375543493166324	0.08982344906767697	0.8159371195962223	0.09328016964899845	0.6172753820466962	0.0719890351319511
30	0.7149535000093161	0.12259032239069013	0.8958304070848312	0.15410007794872085	0.6765792512193607	0.07777051170394947
31	0.8218906441208301	0.15925936051356826	1.0051506104163324	0.23267778359716393	0.7876669483181854	0.08766257559684976
32	0.7466720931841349	0.136952300930568	0.9199018308456995	0.20384303538912407	0.7163463750164759	0.08184065774394157
33	0.665597831312207	0.1269718805642905	0.819091191978978	0.18118985771287274	0.6446029726929003	0.0880757505398046
34	0.8214140196354055	0.15286984681531918	1.0332440284665152	0.30619746087112854	0.7998586426530815	0.10788552357275576
35	0.9562728909471119	0.1721182913708029	1.146444772401935	0.3216779336414454	0.9151346586968163	0.11370202077274129
36	1.009221397606573	0.18718618739244136	1.1221873575175847	0.17188564356115515	0.9734136390354068	0.12667229727241663
37	0.8449140189045797	0.13136875998578668	0.924206140505095	0.14926301618088975	0.8602768277923057	0.09374877177496778
38	0.6132446712645818	0.07179676562781188	0.7380693748496535	0.08781283960614424	0.6432592887598316	0.09378041882507573
39	0.5907826682875615	0.06593172545272658	0.6830492122381969	0.06209124377014317	0.6016033164719707	0.07661080770839974
40	0.5694275315334064	0.03793099214239556	0.6751104550677584	0.056279934403300015	0.5761372801940261	0.05487734918478208
41	0.518274378699024	0.037434819796089334	0.6681009397213153	0.054978930523857376	0.5402259577002219	0.0836434647732633
42	0.5254286752824361	0.050619276347515695	0.6570845174213091	0.06396311720073021	0.537726122121695	0.07914367556043206
43	0.5833237823740353	0.03960761577564911	0.6708579678636041	0.036947585611148	0.5612960744677188	0.036466513999526176
44	0.5560573606612716	0.04696637186947666	0.6977048614816277	0.0543987325858525	0.5482907847206998	0.03585329920696394
45	0.5536875769813799	0.05322455068841427	0.7409866842808839	0.05848025276073961	0.5589597901532138	0.10488644474930742
46	0.6277760987693713	0.046952085015225666	0.7924997555286165	0.06271431939349165	0.6480358198729227	0.08714781793521484
47	0.6313108607561925	0.04311725595266932	0.8557142395675671	0.08134934684335134	0.6471078097811502	0.03844914505550065
48	0.6419476972238677	0.0534370444459381	0.9450065471462313	0.14634590874631423	0.6476946672651783	0.07360858517268803
49	0.7044528870881618	0.05489299247216054	0.9861799586939064	0.11035933509220056	0.7339442442237821	0.14796247088864492
50	0.7436595717891378	0.06267993743780884	1.0665897402120563	0.19507122752635067	0.80505753311077	0.12238131035099668
51	0.7308977424425485	0.08870322167596104	1.1589461993855499	0.12346998287459018	0.7686784549833653	0.052894160143321094
52	0.8106117190240479	0.10922647999850005	1.1712312088810946	0.12467423804055554	0.8079660781158727	0.08249155532038631
53	0.882625854325425	0.1225854463617128	1.2478881007438412	0.22146141190911234	0.9809015176344323	0.24440175716797038
54	0.8970141357573874	0.1324234270910504	1.375190434059409	0.3112789211637325	1.043081965624754	0.24078293774346649
55	0.9447873584095351	0.16146187104879603	1.4485312078077304	0.1683333141122107	1.0156567918009705	0.13962444246165082
56	1.0145106518328175	0.16573505799962027	1.4708154490649106	0.21375559473789973	1.0971866351770474	0.2167747310160603
57	1.0616576370751525	0.1748467566566185	1.5180428951669416	0.24964657838247978	1.0650597644586115	0.18159975983646512
58	1.1532318555833603	0.20348555031223176	1.667921538052436	0.3137521838649409	1.0451228604410132	0.11680977678915568
59	1.2499074370620729	0.23389928077273153	1.7774206509575616	0.12037213075232756	1.1843753730027864	0.12424482524033204
60	1.3008598777196958	0.2475853622517735	1.8026128184531143	0.17014201267792342	1.194330874720192	0.09672242604582965
61	1.4026303863335332	0.3027442251374184	2.024272794040122	0.3414117862058753	1.0849676608117909	0.12567042839639017
62	1.6267504651048303	0.3309300535000433	2.290649592885719	0.34422316485954696	1.2645345808183202	0.15229158901022388
63	1.7244457901004389	0.3740978238647769	2.2970283427820637	0.22538692210274008	1.4370461044653533	0.13793207339153463
64	1.8182526168025805	0.49280509210250445	2.4224721556477546	0.358035556271738	1.300844660596942	0.11795629081801226
65	2.1316853032886014	0.5504335464760953	2.8089872041496275	0.5209484640937336	1.3023833344472386	0.16399345963350817
66	2.5253588406032113	0.5697436145894806	3.0837146130729653	0.5226016951300705	1.6764734266624017	0.17874852557796267
67	2.823001676947593	0.7720070768374714	3.2246538335314074	0.46685057638862915	1.7572481076158113	0.1700001869581202
68	3.321198614434253	1.0921824469828225	3.7349822781174193	0.6324533968291767	2.0046853283379895	0.2691326385476967
69	3.4939401200946953	1.349401635804574	4.453311802426794	1.2001353874485614	1.8766758414638272	0.29780602952753527
70	3.787219061589601	1.4315806314413841	5.033590859335637	1.5849740210155316	2.0078365413615034	0.2734090273440916
71	3.686038129393294	1.073944639626007	5.363468546837339	1.8041238158695105	2.2710419359434924	0.3402671100377043
72	3.3941769422425736	0.9788634925696149	5.605671381195781	2.1910816657677508	2.0876093454887372	0.2778330882557474
73	2.728365252146766	0.7480292496377604	5.308219463198118	2.0660339960828367	1.627625457510626	0.19055129886675304
74	2.683082332938414	0.9328607394044022	4.911104177254433	1.793840612221992	1.7212417759835352	0.24280663302859912
75	2.345791260256581	1.0042033412979452	4.218066627829126	1.4269313381289996	1.574781527327419	0.25047654830694355
76	2.3188850949747466	0.7045120735967237	4.189322165305272	1.2189166563285694	1.4841590149173705	0.19783655890619362
77	2.012329656633346	0.7508975387122102	3.7092177851676897	1.3613830976677816	1.2837933043734553	0.19695232562444112
78	1.6523278656043388	0.37305232750839673	2.5331167672941466	1.029809999889619	1.3036159980688369	0.2791831159093502
79	1.3015384129566059	0.3202280305727125	1.7952743237752504	0.47065484725995776	1.2167703903092826	0.3579646029569524
80	1.1502386174888197	0.1913108092700603	1.5473995093655033	0.1563219143533694	0.9720403033313088	0.05850836211555488
81	1.0968990978073971	0.14749945076110735	1.4756989932134799	0.1786323684932609	0.9788474933573362	0.04272894381857638
82	0.9598298169204486	0.10084331906351127	1.2772009478438917	0.15848680786858904	0.8654014873004087	0.042954580140856055
83	0.9019710518652139	0.11050731059900996	1.1889525004306027	0.14749087174755499	0.7704714818032788	0.06897175725847579
84	0.8939404005022782	0.1172183872711578	1.2247480621894076	0.18699638185002276	0.8241618339784145	0.0469886598572347
85	0.8290234690370685	0.073861712396539	1.1499016804978488	0.18875114334207954	0.806178149888749	0.03938668242735282
86	0.7654540421063656	0.05971545155036189	1.0182211667243837	0.14998251165035864	0.7057701079894398	0.05802301987094093
87	0.7587450791610229	0.06161094456300467	0.9913665134471848	0.14147732052703765	0.6954436216544141	0.0656165159778069
88	0.7494171352503044	0.04809115654548449	1.0311843142544141	0.1523204273429394	0.7590658383157325	0.09185856827871947
89	0.7210814338449484	0.04073701720490034	0.9840926077377676	0.14280162352388778	0.7517589721978467	0.08639657302025859
90	0.6695303021037082	0.03829420729630494	0.8468947150496682	0.11416421658963168	0.6320239720537897	0.04664364302160681
91	0.646899921005748	0.04928273580402091	0.8153777886347195	0.10806585189552059	0.6039306808114715	0.05296317276912427
92	0.6565219729933891	0.06761979978868708	0.8644175935982661	0.128497930939725	0.6718673090138129	0.05032775494411635
93	0.6653581296864254	0.06083423157622404	0.8484844602427394	0.14224081879585393	0.6762126037547228	0.029637568944132678
94	0.6557051062728982	0.07019914358224205	0.7876162930623122	0.10314854509706162	0.605477049615431	0.044790683542218414
95	0.6287467167726842	0.0666910323580992	0.7524843883251954	0.08297056823216375	0.58888403145115	0.03157584020197895
96	0.6204470708627707	0.06382928018279203	0.7757931571226978	0.1278420036416483	0.6330283310891245	0.02219958773594406
97	0.6807327149337766	0.09042680605712827	0.8387225239602106	0.17155295171767776	0.6604260869949866	0.06057001304792013
98	0.7251285795643758	0.12013662174409913	0.7834479174323987	0.1357993178539999	0.6541797580596292	0.06134422684147236
99	0.6320291360646276	0.07970943918505383	0.7033591059375061	0.0750628081747638	0.590475111624916	0.023805207371630343
100	0.7072677906828266	0.09400639994295244	0.7991780998344024	0.136956266455145	0.6931110274554909	0.07674929750495166
101	0.7298323313048263	0.13400772789038262	0.8328400116055024	0.1798314163603098	0.6941023357532847	0.11921617625148317
102	0.6647309999614962	0.12050735215253179	0.7281063578759513	0.10004544664927882	0.6055136706096422	0.07604051437421362
103	0.6652197928580652	0.0941365739532982	0.7234907989639607	0.07216043182943009	0.6259102222631783	0.06192432560500477
104	0.7783067003748965	0.1267261011687053	0.849452800150163	0.15840985394195628	0.7317414123752756	0.12613636687054464
105	0.7908508256020294	0.1316568070221567	0.8634697071923915	0.14313675934393	0.7133210736666982	0.13999932945607504
106	0.7815555533625217	0.11004002003370976	0.845948488201195	0.06341634239244165	0.6874850665581022	0.0878252068111483
107	0.9222096966284578	0.14648241921682098	0.9903776049281169	0.1290365801321552	0.9056398795239627	0.15482714102692285
108	1.159892731431468	0.21872981765851723	1.26292628524645	0.18667532635058345	1.1170134724622118	0.23740722148370097
109	1.2123214128818574	0.21444507683798264	1.3283334326611553	0.10410281251714774	1.157440096837817	0.18606597247289822
110	1.6621354641802581	0.3659364804596002	1.9224525297828654	0.3271761546787793	1.7376598810671497	0.34465917386605355
111	1.9570332466734117	0.3753153409790518	2.221636461634193	0.4836677791596657	1.9183739680458842	0.28124535291579955
112	2.4449824945596164	0.6755706360563323	2.6946475491963846	0.736628942894039	2.1462590240350767	0.5178437102694917
113	2.0730264081171574	0.49988170152812866	2.430178982999943	0.7403556758694151	1.9535910113318762	0.4270585806053857
114	1.8345411840243988	0.2733173092282088	2.0662952110077586	0.49882341314184586	1.8492394083527446	0.3541920014047457
115	1.5777006790566184	0.360509410541843	1.7774493588539795	0.485526126921047	1.7448386180922633	0.42447666634446396
116	1.2473634466949612	0.24327918552499736	1.5449673307850664	0.3630543141653944	1.2423055394605842	0.10329786830104666
117	1.2151922501431598	0.17022812484161304	1.4971983005031066	0.34549599727144875	1.2131975120788956	0.12554949454565248
118	1.0174266861591443	0.12856264817090984	1.260476360680726	0.2665306616578548	1.0183622319690167	0.1254995900201699
119	0.8618009602434232	0.09575429832893867	1.057774747196645	0.18921397189538447	0.8658125209438552	0.10857135512855624
120	0.9186673718941377	0.09582511468294831	1.139937918590338	0.23599979019077863	0.9202702398011174	0.10192304055633344
121	0.9514805860040326	0.08408551648596574	1.2189838834140152	0.2625431426066579	0.9429111763362079	0.09650675654811408
122	0.7877690938026155	0.08279219499258082	1.0188569613796858	0.18782572570301478	0.7741884959537195	0.08870163557794321
123	0.7556034080867007	0.08090132843305117	0.9237649066983687	0.12342889100935951	0.7282154648970103	0.08100531501457787
124	0.8819446530923617	0.09178413625893068	1.0773921332930187	0.1900871021764096	0.8361258061796263	0.06476037252051928
125	0.8602264810120883	0.0882839989542218	1.1101296146575452	0.20287000809302436	0.8168966633016262	0.0606446410555522
126	0.7396376693056134	0.07861552306729387	0.9580185163044542	0.11395206074642471	0.7086175040550339	0.06825947093252188
127	0.7990838912777422	0.07659104057947452	0.9604873432438548	0.12722718336577282	0.7556157116431007	0.047837255590136546
128	0.9276521637166607	0.09572380424492556	1.1406148885387792	0.1646946571354163	0.8763142122390034	0.0425791427868259
129	0.885158436207199	0.09257428304190114	1.1449636497027573	0.16522675670263992	0.8430593035119834	0.06632532245908582
130	0.8294832179616574	0.08400769553210663	1.0257444678791392	0.1402640619223464	0.7958305497847854	0.0760240742634051
131	0.9944532011867735	0.09680331914937414	1.1220085415378112	0.15224481020482009	0.9431583603218479	0.04476920822942766
132	1.12484996393627	0.11698525422342003	1.291841166680333	0.15105157836719132	1.073034002045297	0.07692766738587677
133	1.0910591753987162	0.10755017670983175	1.263321139875944	0.17378824887961877	1.0630363408187584	0.13264914172528253
134	1.1465919613340771	0.14523249715070952	1.2142797859551295	0.16492122566998216	1.1020695510144396	0.12245719822294782
135	1.3385565666192063	0.1453359223601373	1.3833288405264488	0.15500504443912416	1.3099393800055186	0.15372577109688546
136	1.3862086918575773	0.15695525534199256	1.4729498077859409	0.19365384710540304	1.3871556646217502	0.24029073040835194
137	1.3978791897359886	0.2229783960525853	1.4699256560867917	0.1980324788769496	1.4239102751622232	0.27802676944749494
138	1.6022839511635834	0.26821278330820575	1.6070578622968699	0.18794683634767909	1.6079999919852257	0.2780265814707348
139	1.7640101231061134	0.30057805620566935	1.7486616181852186	0.22177988788335268	1.7817471648615903	0.3717579580138003
140	1.8990262864527248	0.3527942167095722	1.8360033649585656	0.27635820403239475	1.8276211281083388	0.4107154323710385
141	2.1480813978528315	0.6056354398663082	1.9493143429710715	0.2410282771214049	1.9454026510794475	0.3679485210948168
142	2.5849260825987064	0.8355635728746983	2.1530605014657804	0.23825770379980396	2.1771934879927852	0.41342598327561425
143	2.904164425613471	0.8223153790583396	2.3526913957114837	0.29512444738916277	2.3915592714745313	0.5770423444279239
144	2.8802825546348974	0.7578109423776256	2.521462410351679	0.3643913525898333	2.471567679274204	0.5700967896338259
145	3.1657097978626525	0.6634460674126856	2.7060894425965443	0.5641246130239363	2.4268451294347844	0.5354675921119446
146	2.7022312114722635	0.6332831796934502	2.787171771695773	0.6286983272487595	2.417511697293955	0.5477382274638314
147	2.4979791601115093	0.6431754292020798	2.88424223528418	0.6198353285716987	2.5251790563571808	0.6933730728919657
148	2.0936283205561677	0.5879303571065785	2.274257139803982	0.2586057333499991	2.1116387242433974	0.44205277425810346
149	1.7151554009436563	0.4890416055149053	1.7851197054928825	0.1600482195665012	1.7386941516001528	0.35731271908622986
150	1.5357771472987933	0.36562983497814167	1.7782896929568448	0.1916306465088847	1.7034415801467453	0.2870496490914769
151	1.2957699789617025	0.24526402519143128	1.6585828560345393	0.11988382543279773	1.5286854332228097	0.2254240510416294
152	1.0973896196731816	0.19111799779092348	1.408653145233681	0.09685107042706385	1.2750892440219117	0.21845207149705334
153	1.1282230290364252	0.2553764823679895	1.3387662461069276	0.18107258008069543	1.203060690250332	0.1684353607130092
154	1.0696514036401512	0.21242007604769012	1.3629480029543208	0.20066597774395833	1.167130310636524	0.13145883699960634
155	0.8197042856061233	0.0978185398285417	1.1799917131664517	0.10706617808196044	0.9575192754623325	0.09057947792468814
156	0.7836140649184693	0.12151367350538123	1.0252887561916835	0.11037035201314448	0.8325889912030268	0.06834457385991582
157	0.9095022408256151	0.15453068894413957	1.0968064076244541	0.21477835402586118	0.927603823946964	0.09509216833721965
158	0.8564106623897602	0.12318222673626188	1.0847553272543198	0.1929106317635936	0.8825567581914685	0.09754677516146863
159	0.6792643904437811	0.08311804163129674	0.9249781731098331	0.10915617110674863	0.7190333215245791	0.05592519286215697
160	0.7786443317270894	0.08498772371586545	0.9470096411888048	0.1616541054880223	0.8147337243971507	0.08464163636712392
161	0.8641672033302833	0.11580139557382205	1.0055921620500337	0.19400736785411335	0.8867665270062576	0.11490269589886778
162	0.7286323088750127	0.08274637907513964	0.8883038540510132	0.12577857183211058	0.7328159749348052	0.06988596736980927
163	0.6647035102861568	0.06710407907984699	0.8271529087296678	0.10802009440211843	0.6917689806248019	0.059883032738076644
164	0.7877610551057258	0.09760863249755089	0.9222626343712134	0.14605212879959426	0.8059375305232138	0.08697168389215486
165	0.7662422643456192	0.09753977256204685	0.8915039713507474	0.13363138182249484	0.7880042299795852	0.07502880346449804
166	0.6471046952187967	0.061088145170549626	0.7909862212357165	0.129815746556313	0.6924190533492213	0.06926170371701715
167	0.7092164820119505	0.06893783038859772	0.8510047263329699	0.11784560657354225	0.7541088799838852	0.08813385292620346
168	0.7695881709982076	0.09138119170809865	0.9029436485885861	0.12131642183912582	0.823379885003059	0.09387366075843503
169	0.6966584885279676	0.07266173337236516	0.8356806167498254	0.13113676587045686	0.7571559556375359	0.09237047026965152
170	0.7612912553774565	0.05795280782706954	0.9137930745519807	0.13120243244533594	0.7957796829406633	0.08361234978026107
171	0.9019076277897203	0.09020429875197519	1.0361906102764953	0.10468375550449929	0.9438198371892277	0.08883389159258825
172	0.8854023161911374	0.0869460648893777	1.0186988758091593	0.11114406345132824	0.9432922930637728	0.10673541894651122
173	0.9145197838208744	0.06218092906115818	1.0510258114471978	0.12329441732624061	0.934287496041303	0.10035118706610203
174	1.138121533478041	0.09008387315291023	1.2624381153128486	0.09201092265549773	1.1195312842031713	0.08790107446738872
175	1.212386920844659	0.09639608175807039	1.3655922905858668	0.11888545211807744	1.2418598898258415	0.14203979520199514
176	1.207500894715562	0.09193766585028441	1.36541656477612	0.17382405768279469	1.205772480332122	0.1575729045930657
177	1.0197007979465	0.07708524030978815	1.1478768894321296	0.12585211037866026	1.0433621641904478	0.13818259866446925
178	1.0635662772478616	0.1160027542503296	1.201481342572842	0.16165556642449772	1.0954296605733689	0.16438307040062108
179	0.8819502744799407	0.08982707892225986	0.982785647318185	0.11111801087652107	0.9381370002564838	0.15131136579572527
180	0.7519997353309971	0.08032209267420425	0.8684361817662173	0.09465951755770897	0.8068167936209814	0.11672936470799844
181	0.6303764729727553	0.06423626824900473	0.7483841741908849	0.07855703435527084	0.6747512687372241	0.09436170023347158
182	0.6618276878808036	0.08058137250546478	0.7500986273168122	0.08608313878922974	0.6782046091368404	0.09624690427437761
183	0.7182305863744181	0.09171604247304312	0.8222536506093352	0.10836903598296715	0.7318549892406332	0.10252911659815188
184	0.6453702879807796	0.06685700123003359	0.7759327561149315	0.10902863355103834	0.6869629786425135	0.08468774661463824
185	0.6081720955923011	0.056003377064924455	0.7067461494994011	0.09835206087062219	0.6310995510569005	0.07446141004590048
186	0.6873405123492796	0.0704423013933723	0.791217505640376	0.1321251238849329	0.681588461338607	0.09064238448685327
187	0.7171034203681782	0.0635277210868803	0.8772964106937885	0.16898771270148988	0.7366951332441815	0.09211598153272274
188	0.632574891039408	0.058092441006688124	0.8128078503892003	0.16968251578657834	0.6797576139997208	0.07524292847089563
189	0.6570022975017776	0.05287573020902195	0.7934787753868574	0.1536100452471607	0.6826697871486088	0.06793426441112306
190	0.7542624123467451	0.06028547208943928	0.9380200317374263	0.20190511997817498	0.7685518820133987	0.059977364491344866
191	0.7302085771164805	0.06314317684981569	0.9824825498560287	0.24724573939857225	0.7838850269182068	0.06505765245114681
192	0.6994574278748967	0.044034177696287154	0.9284562791783572	0.21288552214690576	0.7559199903510497	0.06435114801398857
193	0.758343559426281	0.04618165494822176	0.9796951229046552	0.21126079490100966	0.7945454350102197	0.0617155125584289
194	0.8560318899898683	0.04180816573009206	1.1230150807587462	0.26175831009650585	0.9051790375041305	0.09048039438613406
195	0.8457109342275904	0.0407202122644841	1.1124141612455067	0.2543145235629174	0.913769996156813	0.10095209729224595
196	0.7730735999630954	0.03647327296953418	1.031823297770804	0.20560676176348466	0.839613839927439	0.09349964753615853
197	0.887088190810438	0.04765190176281597	1.170523101849139	0.24512047722353195	0.9473346963097998	0.12123059702694837
198	1.0028707030229203	0.05142277588454883	1.2848474669656922	0.27449842973957983	1.0618662672591443	0.14693638861966674
199	0.8987962150209604	0.057187999170141335	1.1678802938490713	0.23614651983738968	0.9401670163805461	0.10550152189741827
200	0.8532126653916184	0.06894756154826036	1.1221036876357147	0.21034239846947855	0.8701658796685843	0.07443020664570825
201	1.0386081793009854	0.10678747654857453	1.3256742670163029	0.25940326963444216	1.0531965182749745	0.11720770206758575
202	1.1146711717930173	0.1310438121320956	1.379061591125694	0.2595810697728001	1.1057277859953292	0.11065370127381059
203	0.9830811934121296	0.12170261876301858	1.239264387791123	0.21638816982143563	0.947078632444731	0.06793795481614186
204	1.0730647756104996	0.17488961495062114	1.3184715436916623	0.19841153474278247	1.0002657821464929	0.10973146943255048
205	1.2886579183217044	0.2614296064890336	1.5439604921422951	0.23837871943545588	1.2070321000372297	0.157451843449053
206	1.282152501491721	0.25288323925928985	1.5416216032310759	0.24146627584331215	1.195668719258305	0.12276245709721417
207	1.1741194232616146	0.2541339454357618	1.516515064282494	0.23351784846987297	1.1153568626321546	0.13869791829730194
208	1.3652017130522023	0.41384375136286067	1.6952994184655383	0.28744999954501915	1.310996860551228	0.30543167834516516
209	1.5570240815266299	0.4042022773870639	2.1541954919811026	0.44425835291307614	1.4781264820555098	0.45092232241448565
210	1.863726951762878	0.5259279425735572	2.5439900971415494	0.669804083669903	1.7788446021824174	0.5588545198721875
211	1.092239508438748	0.28349285407933866	2.248965632555373	0.5570494444213722	1.1532039303685049	0.17444906317164316
212	0.9698303681273998	0.21650331144609278	1.891748609694137	0.40283623903603477	0.9564846949721723	0.09106050071455732
213	1.171370634496416	0.2204235505390338	1.8934940642527935	0.3903947854471363	1.0912428490999468	0.09088906021292964
214	1.1535913012975907	0.20835484925571798	2.039791367966863	0.4581003299753084	1.1211640385860846	0.0891138084591282
215	1.1301729249145123	0.17037340620238944	1.8883468864267607	0.394003859698537	1.1111736905744964	0.12656128424361748
216	0.970035710081182	0.14854360604891206	1.4979174064637553	0.35347903100975286	0.9275235489512949	0.12587774357286172
217	0.8321207833436777	0.15309001657626833	1.51547343105911	0.3434107539136277	0.7775515069822291	0.08225551680035474
218	0.8666292020251946	0.14674791441148835	1.6194976164231043	0.3767406283612416	0.8427887197298981	0.0977722286028225
219	0.8376302582532871	0.10997669384273477	1.3699796014873413	0.2453696092742951	0.8263096267430488	0.14056082897284752
220	0.7340454090528151	0.08845493242258197	1.172168269705037	0.21288418688192293	0.7265714703793268	0.15566578864506525
221	0.776429493292985	0.08983494991592017	1.4003884929472212	0.3567032161900577	0.7613988321951078	0.12931619099879382
222	0.8323541731206875	0.09954154264950682	1.4422220539068416	0.34966978649388436	0.838413696616468	0.11781115438053999
223	0.8268682454718945	0.08536737298227566	1.2770170754501995	0.26599710640069985	0.9006519224569599	0.1575878361247826
224	0.9930452970376171	0.15472667043308214	1.4961456456866007	0.31569496974374667	1.0879458951430427	0.2570394345749141
225	1.1361131477898447	0.15962541766554125	1.7489162142587507	0.4213115862879	1.1929610079575106	0.2016634093689523
226	1.1717700685209478	0.14714209341417658	1.7025144702817887	0.39732032520016586	1.344411856064826	0.2296482463913725
227	1.0180273178859738	0.1433225212803182	1.4145675274136904	0.3638287746501056	1.2489899338242434	0.29311879679715364
228	1.148604833899353	0.1952653369994126	1.493051661849056	0.5017857601226897	1.3795888146948976	0.3908772177557507
229	0.9406244113671055	0.13557429118497732	1.4281177942717436	0.6391086602646506	1.4034381542897236	0.7703977516887983
230	0.7858947989584407	0.12776089123353854	1.2529823274546414	0.5635116098906947	1.3042344997458588	1.056650013665415
231	0.9808330758285663	0.2347868421723712	1.5540827745516268	0.598552383087308	1.2203681746646085	0.542800773492811
232	1.0446073238270304	0.22253916999244805	1.4694978479200014	0.42137771665012796	1.1698556245387886	0.3045251372672526
233	0.7126366275458529	0.07672281635474797	1.3465363354810667	0.52056825057635	0.7371175320389477	0.04519068896317738
234	0.7121079019503301	0.11488348180419533	1.3959491700073567	0.2933535676691603	0.7359337657507412	0.08154612452881992
235	0.7257067804052464	0.13982022448372722	1.5085416476935682	0.3844439063320848	0.7878846989520697	0.08670769480621021
236	0.7034007109243885	0.13988447840102142	1.2245062568135168	0.1822447027205882	0.7139618932745128	0.08777799157132195
237	0.8678560494371123	0.2159055551050361	1.3285181354273743	0.14977120581320727	0.8290539116646105	0.11855885561804415
238	0.8888225128770327	0.2470269850092611	1.263445545277165	0.13144765377201473	0.8304048562767234	0.12762004101213006
239	1.0572270943082274	0.3235297560665671	1.4954873955326038	0.17330082971563487	1.0615033151492803	0.19005885200942
240	1.1098994372574436	0.3111611213810949	1.771156663490595	0.36525824965265097	1.413927218023724	0.31728573115012987
241	1.5386178244045834	0.4804526730630727	2.2452905320550034	0.44212186061877723	1.9036547585475105	0.4562299288920128
242	1.8269870360600606	0.594435095782047	2.60601380758138	0.5479348317946223	2.0816421647588936	0.5069255781788286
243	1.663379465329231	0.44323985312012093	2.3161390011601237	0.46589121894030977	1.8392599883891236	0.4028951227123368
244	1.2609056616404286	0.2828240121932528	1.7781037992225608	0.27093352559569384	1.4399312207424166	0.3325681776817669
245	0.9545396496447415	0.2405438818747558	1.3776459521319178	0.1876346222166972	1.0362460652180119	0.22305192572254962
246	0.84928913669176	0.22023264600783946	1.2501339008741517	0.07125043421026858	0.8852611078093707	0.18330233069115293
247	0.701450354146513	0.1449939077382154	1.0631385066669543	0.05869464031701587	0.6937049692051899	0.11828855483463792
248	0.721389925875766	0.13573346809955128	1.147943091980651	0.0831580722393862	0.7069246602749847	0.10676198460941379
249	0.6301666296354426	0.09074179425673859	1.144185804428342	0.19445993745785622	0.637076333510571	0.11288510205274238
250	0.5978295186018876	0.08260242337299246	1.1677609482309512	0.18556464492632138	0.6335512040931216	0.08535822965866374
251	0.6056324683193068	0.08201183845817758	1.0059121957015242	0.17110301373451253	0.6495552426670467	0.10896280513727359
252	0.8078587784744472	0.1623057239592291	1.1576201581868863	0.22881155932401542	0.7999709254935942	0.14357024837181742
253	0.912064206683148	0.2485623360436382	1.1987478058813836	0.23769642786493925	0.8743181819771989	0.18920209175712122
254	1.4774086226153953	0.5788712342160847	1.877039457760363	0.4524289996135909	1.3679572612288118	0.4710693872424517
255	2.003259321693407	0.877603389123205	2.5171666206906966	0.7150632334782364	1.8704751137796372	0.8044981936993877
256	1.5044534978792459	0.35638564263802913	1.7581437731762737	0.4807687425159849	1.5519933007816986	0.5206289656374379
257	1.0546492413604163	0.27457998054275395	1.2779013764982958	0.32921065474541517	1.1466402870671886	0.3499753071120789
258	0.9636337395478186	0.2800627749465311	1.2874157220634852	0.4208006398056976	1.0439311314147934	0.27019912386508205
259	0.8400863549456719	0.24507092921090404	1.1611794169112057	0.3844995474481954	0.9356092795009395	0.24393966337937764
260	0.7948092736035988	0.1935244838998386	1.1640538150021174	0.29718689386887587	0.8410754475011103	0.1353331681624303
261	0.8090638721714258	0.17263386021764607	1.0621772549736865	0.22488577444967905	0.8350138261215743	0.10835468789269463
262	0.7214803942124196	0.15921993436166113	0.9057655403060149	0.1700173693865165	0.7877348127265101	0.12646027154729073
263	0.6246589696110992	0.13041422267161587	0.9626303949399722	0.14894525182823984	0.7056135468331867	0.10496797547134772
264	0.666248967277173	0.11570257711396649	0.9532259096054947	0.0875519689963382	0.6895932856899983	0.07667287321234766
265	0.6935052017231472	0.11542909784596007	0.831557935668989	0.05659126120153072	0.7026436422763305	0.06233396000811815
266	0.6790985754780104	0.11805493463401573	0.8666673788616142	0.05925861539515592	0.696366232672471	0.08159756679444392
267	0.7080213929114282	0.10922318526129403	0.9897916743705438	0.04288634810892323	0.7780408902191788	0.06468233810492677
268	0.7091624073320411	0.08741923353328475	0.9282461269206402	0.04833577888452006	0.7912799088035588	0.05146458534735762
269	0.6248717452380462	0.059495995078143425	0.8246883916860978	0.058969529513456624	0.6835213867960653	0.03605582565020392
270	0.676345983128591	0.06934730347555215	0.949518861066423	0.07744705666570563	0.7538084862511315	0.06339159104183403
271	0.7977367931765004	0.09331021694475375	1.0634504282941484	0.12469561271954903	0.9149064629321368	0.05311932642414451
272	0.7611714849508915	0.08818295237767237	0.9894678978738009	0.1547728984253751	0.8765199779321527	0.056112100616621
273	0.6718684990627795	0.07312981412628869	0.9514694081093693	0.1546412635248964	0.7327558890623878	0.09919290065325129
274	0.900205940727033	0.09068226647373576	1.1586349902209823	0.1635757246558799	0.9930227480711354	0.11497208699957195
275	1.0553859387574873	0.10788574043967045	1.326916569173373	0.20859370805162197	1.1851196665873427	0.12038046607916104
276	0.9453157957860626	0.1171648072546465	1.316192423508371	0.2853364860992376	1.034548852586055	0.17923780467890288
277	1.0030352033454788	0.12854641052435795	1.331903428944809	0.26104174131403224	1.0522150450653471	0.2226081025853181
278	1.3132664009199873	0.18204021081847624	1.6580197387117244	0.2856962960728889	1.3480811935789532	0.31473960687380154
279	1.7567092418341037	0.23076804384311778	1.8467777245535497	0.2205331002739243	1.6191234815792468	0.31250014132249915
280	0.9451135148797687	0.14806961549687966	1.2982080614816662	0.1867630340562513	0.97066832106288	0.2016831479365649
281	0.8993925355961436	0.16459596595843268	1.3073230529566982	0.1705724091202968	0.9172159710230906	0.1744690824328249
282	0.7251615206930692	0.10717368877010132	1.1311479640071964	0.09024432883448587	0.7381165579447494	0.1320637120963396
283	0.7873107539831726	0.1364976697522148	1.3330054413434371	0.17535792821758875	0.8102924395593126	0.15429947993315998
284	0.6937482394431189	0.10801241979605274	1.312177619663174	0.5169426120925364	0.7074899766302609	0.11854922513658447
285	0.6833909320154352	0.10661226426932549	1.765115459555535	0.8382432741944473	0.7574474307681222	0.1246738128829597
286	0.6659471911896202	0.08743457305927503	2.049091646664151	1.1523876962564794	0.7673867474713821	0.1278201875584922
287	0.6744120568102089	0.09108438476638428	2.6694520473276566	1.7008397742334178	0.7995842022593908	0.14381174213984063
288	0.8234690733367183	0.11728962151937289	3.4771860119866265	2.1770747856494856	1.0716850895484944	0.2766563915191821
