# Supplementary material for: Energy coupling and stoichiometry of Zn2+/H+ antiport by the prokaryotic cation diffusion facilitator YiiP
Source: eLife. 2023 Oct 31;12:RP87167. doi: 10.7554/eLife.87167 (PMC10617992; doi:10.7554/eLife.87167)
Supplement: Figure 3—source data 2. — RMSFs using three different alignment schemes, and their standard deviations. [file elife-87167-fig3-data2.csv]

resid	ALL	ALL std	TMD	TMD std	CTD	CTD std
7	4.9495666266005935	0.5569227538766658	4.718917548158563	0.5379920192724301	7.54370463571835	0.5379920192724301
8	3.944085387591904	0.5939534354748276	3.5760802880309868	0.6008383551413276	7.139746259139894	0.6008383551413276
9	3.376305679504211	0.48269060592883134	2.9267370738676326	0.4715383423553463	6.9772769875674285	0.4715383423553463
10	3.0314380899305426	0.4290223887544383	2.5529825811279334	0.42593324214986794	6.805716931216211	0.42593324214986794
11	2.8605227381756193	0.33221301640783935	2.4067761667495855	0.3521896113523305	6.258610460280806	0.3521896113523305
12	2.6129523186177015	0.32088739777318664	2.148326828166599	0.3362133116304859	6.069138872404928	0.3362133116304859
13	2.4422765203316903	0.3149491826405644	1.9522487250206193	0.32056732005065997	6.345205018058319	0.32056732005065997
14	2.2022370151744903	0.24260492337155165	1.7150575305480913	0.27068042266577697	6.028638604657079	0.27068042266577697
15	2.0931221547607413	0.23828171592646985	1.6556367863030894	0.2683880363621341	5.534967588898023	0.2683880363621341
16	2.0329257095086364	0.2600864507077908	1.5920782504397026	0.2867680876121869	5.756888319180525	0.2867680876121869
17	1.8534411960768733	0.19761686465737088	1.387783164826838	0.22365633474475272	5.966248866043338	0.22365633474475272
18	1.6717109383656699	0.1723403576444093	1.2533136582638704	0.20819886719926975	5.487251172209823	0.20819886719926975
19	1.5990384733638712	0.18697070222773338	1.2329097698132268	0.21109413818991463	5.245145847197768	0.21109413818991463
20	1.573037020917089	0.18003429743099797	1.175119058244727	0.20604425351508146	5.690121916539844	0.20604425351508146
21	1.3891097841745663	0.13079708381152416	0.9755294841981783	0.15756392569829064	5.691821705261262	0.15756392569829064
22	1.245344310839601	0.11714611715370478	0.916227516888931	0.13657665495630533	5.183985157919243	0.13657665495630533
23	1.2665523337049667	0.13335072432438314	0.9633794488181486	0.15274118657687377	5.303094653625077	0.15274118657687377
24	1.2462391159508848	0.1250458421757001	0.8941848226685076	0.1364806496295081	5.752257619175791	0.1364806496295081
25	1.0992133953108847	0.11634697213063089	0.7888526117872048	0.11519850277955498	5.5118304916513	0.11519850277955498
26	1.012239660135496	0.11763404969189467	0.7844957779827166	0.1125764315679181	5.2089301819522795	0.1125764315679181
27	1.1247123823070522	0.15479849142814442	0.8561573696093171	0.12923370665413686	5.653752825674887	0.12923370665413686
28	1.0950119901047077	0.14852119110523396	0.7761140445670924	0.11680268736973846	5.983054992307131	0.11680268736973846
29	0.9140925750736194	0.12330622387907249	0.6375543493166324	0.08982344906767697	5.665319035300651	0.08982344906767697
30	0.9447751436986312	0.14870650759376125	0.7149535000093161	0.12259032239069013	5.604920209231454	0.12259032239069013
31	1.1123888446511907	0.18758294696273559	0.8218906441208301	0.15925936051356826	6.132280006896637	0.15925936051356826
32	1.061113163212216	0.16909692992264672	0.7466720931841349	0.136952300930568	6.228807182206484	0.136952300930568
33	0.9165604667528245	0.1482284705427541	0.665597831312207	0.1269718805642905	5.910846755323875	0.1269718805642905
34	1.0822241918947768	0.17859810783905064	0.8214140196354055	0.15286984681531918	6.162601315766942	0.15286984681531918
35	1.2767723166871712	0.2138588560369541	0.9562728909471119	0.1721182913708029	6.65107989088686	0.1721182913708029
36	1.2967818274819638	0.2332059532323165	1.009221397606573	0.18718618739244136	6.600895912987785	0.18718618739244136
37	1.0849738572456213	0.17385645105188827	0.8449140189045797	0.13136875998578668	6.156943793975731	0.13136875998578668
38	0.8659670950221638	0.08044603546582736	0.6132446712645818	0.07179676562781188	5.936561769215904	0.07179676562781188
39	0.7686529214417476	0.08046835363236184	0.5907826682875615	0.06593172545272658	5.536085604947445	0.06593172545272658
40	0.7915708326440144	0.07670511842579304	0.5694275315334064	0.03793099214239556	5.5132249848738235	0.03793099214239556
41	0.764238153180549	0.07858159554319628	0.518274378699024	0.037434819796089334	5.55617070255417	0.037434819796089334
42	0.6778586421635929	0.07141937160703948	0.5254286752824361	0.050619276347515695	5.17422425508012	0.050619276347515695
43	0.7142981372291768	0.06894087843148886	0.5833237823740353	0.03960761577564911	4.9050039609884735	0.03960761577564911
44	0.7612501197927322	0.0846424315060554	0.5560573606612716	0.04696637186947666	5.0542023004438015	0.04696637186947666
45	0.7282797588479051	0.0859332320483871	0.5536875769813799	0.05322455068841427	4.958601908063258	0.05322455068841427
46	0.7310986150973481	0.07391433092610661	0.6277760987693713	0.046952085015225666	4.5057131771511	0.046952085015225666
47	0.7892966468554304	0.07959702511426356	0.6313108607561925	0.04311725595266932	4.393689799473959	0.04311725595266932
48	0.8447640423504614	0.09345848450656047	0.6419476972238677	0.0534370444459381	4.613933621920148	0.0534370444459381
49	0.854884910598979	0.09837090072408941	0.7044528870881618	0.05489299247216054	4.357391886231208	0.05489299247216054
50	0.890378726047352	0.09050025044262987	0.7436595717891378	0.06267993743780884	3.934451927474162	0.06267993743780884
51	0.9551066351188928	0.11875675092676756	0.7308977424425485	0.08870322167596104	4.0653582388054685	0.08870322167596104
52	1.0349729334357103	0.1484798149778969	0.8106117190240479	0.10922647999850005	4.2243017703094985	0.10922647999850005
53	1.0764740251118978	0.16021484177960418	0.882625854325425	0.1225854463617128	3.819993314013883	0.1225854463617128
54	1.1220280180746875	0.1679382104291773	0.8970141357573874	0.1324234270910504	3.5677915200468155	0.1324234270910504
55	1.1980318474097493	0.20205132175090615	0.9447873584095351	0.16146187104879603	3.8516622976280463	0.16146187104879603
56	1.2497737797140862	0.2194622717569941	1.0145106518328175	0.16573505799962027	3.796076092235101	0.16573505799962027
57	1.2963007833065683	0.23126979348531343	1.0616576370751525	0.1748467566566185	3.3441332362407263	0.1748467566566185
58	1.405804174728836	0.2614976908001166	1.1532318555833603	0.20348555031223176	3.3997298545509307	0.20348555031223176
59	1.4987485153587647	0.29228681455072547	1.2499074370620729	0.23389928077273153	3.7025024308570074	0.23389928077273153
60	1.5483409574176135	0.31073361396244853	1.3008598777196958	0.2475853622517735	3.428808547249527	0.2475853622517735
61	1.6661119318234252	0.3585420483497155	1.4026303863335332	0.3027442251374184	3.148405762538983	0.3027442251374184
62	1.8878913658251533	0.3908766177058639	1.6267504651048303	0.3309300535000433	3.5386987984026184	0.3309300535000433
63	1.97962843684305	0.4267867846859534	1.7244457901004389	0.3740978238647769	3.678719850828719	0.3740978238647769
64	2.0625783771466866	0.4974977314053806	1.8182526168025805	0.49280509210250445	3.2924898098051982	0.49280509210250445
65	2.373395472709167	0.5812042156881614	2.1316853032886014	0.5504335464760953	3.4365673662386045	0.5504335464760953
66	2.7600608377113782	0.6802932967184268	2.5253588406032113	0.5697436145894806	4.030776835862028	0.5697436145894806
67	3.0562881535044615	0.8893223969163401	2.823001676947593	0.7720070768374714	4.212035086601584	0.7720070768374714
68	3.520659575689043	1.1597797105234628	3.321198614434253	1.0921824469828225	4.387609516362722	1.0921824469828225
69	3.6714519648909043	1.3855612065091787	3.4939401200946953	1.349401635804574	4.357590754418524	1.349401635804574
70	3.9163961308612265	1.5149438418864405	3.787219061589601	1.4315806314413841	4.468841205506513	1.4315806314413841
71	3.7350460774340104	1.150577827759972	3.686038129393294	1.073944639626007	4.143517940338238	1.073944639626007
72	3.414549024511823	0.9967790038077815	3.3941769422425736	0.9788634925696149	3.5578262948328327	0.9788634925696149
73	2.74586911027013	0.7910416134511973	2.728365252146766	0.7480292496377604	2.7584020896903714	0.7480292496377604
74	2.7256189075704325	0.9921713542894443	2.683082332938414	0.9328607394044022	2.6774100833458565	0.9328607394044022
75	2.4188474834969638	1.0145474350568444	2.345791260256581	1.0042033412979452	2.3366895793570617	1.0042033412979452
76	2.4639706911805006	0.7416049330696803	2.3188850949747466	0.7045120735967237	2.3000422540088947	0.7045120735967237
77	2.1625452457119203	0.7610231704061368	2.012329656633346	0.7508975387122102	2.216377938690733	0.7508975387122102
78	1.9048930923009753	0.4369179369920471	1.6523278656043388	0.37305232750839673	1.9815767406733968	0.37305232750839673
79	1.6151088816817676	0.36217542951298926	1.3015384129566059	0.3202280305727125	1.8443041639947897	0.3202280305727125
80	1.4324563802370183	0.26820113060673856	1.1502386174888197	0.1913108092700603	2.1169090837302083	0.1913108092700603
81	1.356061974820596	0.222550375499602	1.0968990978073971	0.14749945076110735	2.3249786307575424	0.14749945076110735
82	1.23392767501463	0.17564280805217106	0.9598298169204486	0.10084331906351127	2.075284718811336	0.10084331906351127
83	1.1746547205954851	0.18255102669452047	0.9019710518652139	0.11050731059900996	2.0259210363827336	0.11050731059900996
84	1.1216269966174124	0.16380363356946814	0.8939404005022782	0.1172183872711578	2.4373568340457106	0.1172183872711578
85	1.0478853262259902	0.1293911089957504	0.8290234690370685	0.073861712396539	2.535354171916033	0.073861712396539
86	0.9905016587124993	0.11133272619205364	0.7654540421063656	0.05971545155036189	2.3652664664436993	0.05971545155036189
87	0.9524323717948868	0.10059617220303335	0.7587450791610229	0.06161094456300467	2.598027374211502	0.06161094456300467
88	0.9041437864798682	0.08320527471274292	0.7494171352503044	0.04809115654548449	2.9549261287388493	0.04809115654548449
89	0.8792295796924527	0.06902276334060463	0.7210814338449484	0.04073701720490034	2.9555540368730537	0.04073701720490034
90	0.8161627312483289	0.05909748215679553	0.6695303021037082	0.03829420729630494	2.9605411925756377	0.03829420729630494
91	0.7517473533262967	0.059601679459840066	0.646899921005748	0.04928273580402091	3.261589515049133	0.04928273580402091
92	0.7445417053150755	0.07498146166080544	0.6565219729933891	0.06761979978868708	3.5321152086495125	0.06761979978868708
93	0.7511128125683291	0.059828321998138374	0.6653581296864254	0.06083423157622404	3.525282667982897	0.06083423157622404
94	0.7137815910333476	0.06559084607701068	0.6557051062728982	0.07019914358224205	3.667063739364176	0.07019914358224205
95	0.6666135643663089	0.06320115882326492	0.6287467167726842	0.0666910323580992	3.976909867756868	0.0666910323580992
96	0.6733597588091708	0.0636143419935604	0.6204470708627707	0.06382928018279203	4.128508127493441	0.06382928018279203
97	0.726045157837114	0.0854951853921635	0.6807327149337766	0.09042680605712827	4.208816826740706	0.09042680605712827
98	0.7549122101407612	0.11468136685031385	0.7251285795643758	0.12013662174409913	4.497170944437154	0.12013662174409913
99	0.6809737138783	0.07471904226129657	0.6320291360646276	0.07970943918505383	4.681307289444999	0.07970943918505383
100	0.7894503014386888	0.08413551044149381	0.7072677906828266	0.09400639994295244	4.829996746368803	0.09400639994295244
101	0.8188070376502093	0.11767521128183686	0.7298323313048263	0.13400772789038262	5.0831420046635145	0.13400772789038262
102	0.7593133004408136	0.09842642560581168	0.6647309999614962	0.12050735215253179	5.247215592390762	0.12050735215253179
103	0.8058231176400178	0.08304426982689914	0.6652197928580652	0.0941365739532982	5.410433949077308	0.0941365739532982
104	0.9376488962485813	0.11191861978408835	0.7783067003748965	0.1267261011687053	5.577212387011886	0.1267261011687053
105	0.9720467568480068	0.11741246872737102	0.7908508256020294	0.1316568070221567	5.861754713116635	0.1316568070221567
106	1.0061330411749878	0.12246321392301751	0.7815555533625217	0.11004002003370976	6.078472203014679	0.11004002003370976
107	1.1663060923353148	0.11100615327282275	0.9222096966284578	0.14648241921682098	6.204733998282528	0.14648241921682098
108	1.3864215553088677	0.17520940517621142	1.159892731431468	0.21872981765851723	6.442999599911407	0.21872981765851723
109	1.455198488777051	0.15340394289153306	1.2123214128818574	0.21444507683798264	6.696483035159261	0.21444507683798264
110	1.8960037746730816	0.29096516377546816	1.6621354641802581	0.3659364804596002	7.010025573540545	0.3659364804596002
111	2.1659721614202048	0.3190435203760201	1.9570332466734117	0.3753153409790518	7.133267137129931	0.3753153409790518
112	2.6512983373830075	0.574728277241741	2.4449824945596164	0.6755706360563323	7.400875781064436	0.6755706360563323
113	2.2820374543169493	0.4357929865752825	2.0730264081171574	0.49988170152812866	7.18846850173852	0.49988170152812866
114	2.091754077200114	0.227659827483318	1.8345411840243988	0.2733173092282088	7.427288011203994	0.2733173092282088
115	1.8296283616384192	0.3282794294643509	1.5777006790566184	0.360509410541843	7.271284909335883	0.360509410541843
116	1.5603656622651305	0.2302732903108256	1.2473634466949612	0.24327918552499736	7.00649308359917	0.24327918552499736
117	1.5694743139654337	0.17520556941547455	1.2151922501431598	0.17022812484161304	7.253755121200382	0.17022812484161304
118	1.3820084420966996	0.13439494200745505	1.0174266861591443	0.12856264817090984	6.960901221236248	0.12856264817090984
119	1.204297133640819	0.1182979638191625	0.8618009602434232	0.09575429832893867	6.540180133845257	0.09575429832893867
120	1.2972214912424944	0.11612667284031794	0.9186673718941377	0.09582511468294831	6.77989997262534	0.09582511468294831
121	1.3524830565249	0.1043083510524072	0.9514805860040326	0.08408551648596574	6.934774288030945	0.08408551648596574
122	1.1764986249906262	0.09350365717488292	0.7877690938026155	0.08279219499258082	6.468754383170516	0.08279219499258082
123	1.134442367726739	0.0984772774679062	0.7556034080867007	0.08090132843305117	6.269314619035782	0.08090132843305117
124	1.310037466358149	0.11249262934644114	0.8819446530923617	0.09178413625893068	6.646316212818118	0.09178413625893068
125	1.298422477169036	0.1195858526992718	0.8602264810120883	0.0882839989542218	6.553197085062731	0.0882839989542218
126	1.1401851208543012	0.1175405978349463	0.7396376693056134	0.07861552306729387	6.020625977645612	0.07861552306729387
127	1.2335186821098454	0.1289853743613831	0.7990838912777422	0.07659104057947452	6.138642063702812	0.07659104057947452
128	1.415473757530237	0.1448304523176376	0.9276521637166607	0.09572380424492556	6.483955578340363	0.09572380424492556
129	1.3478064015125863	0.13398499186745158	0.885158436207199	0.09257428304190114	6.117713158456245	0.09257428304190114
130	1.2612721549405752	0.12789505591786599	0.8294832179616574	0.08400769553210663	5.70384168716136	0.08400769553210663
131	1.4883421111504618	0.14865136126183534	0.9944532011867735	0.09680331914937414	6.108061210928567	0.09680331914937414
132	1.6426935324254048	0.1596942543691819	1.12484996393627	0.11698525422342003	6.263465374894292	0.11698525422342003
133	1.5693797539034584	0.13625546783004489	1.0910591753987162	0.10755017670983175	5.724951420319648	0.10755017670983175
134	1.6466979067085885	0.15639458869908968	1.1465919613340771	0.14523249715070952	5.745544609895577	0.14523249715070952
135	1.895204776750334	0.1880889045651575	1.3385565666192063	0.1453359223601373	6.2771247024242784	0.1453359223601373
136	1.9423642830599868	0.18255916876301018	1.3862086918575773	0.15695525534199256	6.10048966947702	0.15695525534199256
137	1.9358171101776878	0.19678489738768368	1.3978791897359886	0.2229783960525853	5.681280146680192	0.2229783960525853
138	2.163746852852409	0.23741494884335632	1.6022839511635834	0.26821278330820575	6.1042920959111635	0.26821278330820575
139	2.3534860363341044	0.25793325842281856	1.7640101231061134	0.30057805620566935	6.466232889552057	0.30057805620566935
140	2.47235878626892	0.2878842727403858	1.8990262864527248	0.3527942167095722	6.151410027415465	0.3527942167095722
141	2.71713891109609	0.5606492172847374	2.1480813978528315	0.6056354398663082	6.163296591027628	0.6056354398663082
142	3.1410988279007057	0.7567841237125779	2.5849260825987064	0.8355635728746983	6.784212937657127	0.8355635728746983
143	3.4489375538297296	0.7221808707252022	2.904164425613471	0.8223153790583396	6.956118197780996	0.8223153790583396
144	3.435070062350565	0.6959242666767752	2.8802825546348974	0.7578109423776256	6.553269582073161	0.7578109423776256
145	3.5815687319787606	0.6258733290306936	3.1657097978626525	0.6634460674126856	6.248887673851363	0.6634460674126856
146	3.1198957876285522	0.6391550061650995	2.7022312114722635	0.6332831796934502	5.58724226367761	0.6332831796934502
147	2.881699814514331	0.6345897896243746	2.4979791601115093	0.6431754292020798	5.181249361867471	0.6431754292020798
148	2.501918772806374	0.5888472452541992	2.0936283205561677	0.5879303571065785	4.7361183177748485	0.5879303571065785
149	2.132222515791647	0.42006794527694796	1.7151554009436563	0.4890416055149053	4.897810888401639	0.4890416055149053
150	2.0097206818845748	0.3186934264777552	1.5357771472987933	0.36562983497814167	4.943921372430199	0.36562983497814167
151	1.7202458854621263	0.22576013283583835	1.2957699789617025	0.24526402519143128	4.438299945768191	0.24526402519143128
152	1.51409769051718	0.19432066710246684	1.0973896196731816	0.19111799779092348	4.539516094728067	0.19111799779092348
153	1.599953089239696	0.22750941078717046	1.1282230290364252	0.2553764823679895	5.039682051921233	0.2553764823679895
154	1.5111691037478021	0.2054497966422956	1.0696514036401512	0.21242007604769012	4.857003345875628	0.21242007604769012
155	1.2012541314610603	0.16564614571471536	0.8197042856061233	0.0978185398285417	4.5258655977178925	0.0978185398285417
156	1.1940421693119145	0.16717197479119839	0.7836140649184693	0.12151367350538123	4.950753824005381	0.12151367350538123
157	1.3305371184602364	0.1870123814515989	0.9095022408256151	0.15453068894413957	5.270215451261948	0.15453068894413957
158	1.197551094554322	0.18200561395680728	0.8564106623897602	0.12318222673626188	4.9551525844216995	0.12318222673626188
159	1.006475480106361	0.1550678721024148	0.6792643904437811	0.08311804163129674	4.990133114485876	0.08311804163129674
160	1.1583086382755592	0.16242293867222712	0.7786443317270894	0.08498772371586545	5.529706342658685	0.08498772371586545
161	1.2027113238283644	0.16530095323093394	0.8641672033302833	0.11580139557382205	5.554758414858077	0.11580139557382205
162	1.0069150623318608	0.12494700701923189	0.7286323088750127	0.08274637907513964	5.278017688210981	0.08274637907513964
163	0.9963076381867982	0.11303204510901647	0.6647035102861568	0.06710407907984699	5.621722652094964	0.06710407907984699
164	1.1616582787392702	0.12066144024597908	0.7877610551057258	0.09760863249755089	6.027409548915312	0.09760863249755089
165	1.0905718510728502	0.11427647768206003	0.7662422643456192	0.09753977256204685	5.856646604537737	0.09753977256204685
166	0.9576614114706338	0.08318117847251484	0.6471046952187967	0.061088145170549626	5.8372892033815225	0.061088145170549626
167	1.111467859167872	0.09071131418027999	0.7092164820119505	0.06893783038859772	6.334193175186395	0.06893783038859772
168	1.1923096394132051	0.09107027949246774	0.7695881709982076	0.09138119170809865	6.4976219826089014	0.09138119170809865
169	1.0707245060691364	0.07912059526923994	0.6966584885279676	0.07266173337236516	6.309732492281486	0.07266173337236516
170	1.1515131067141071	0.09202040471899066	0.7612912553774565	0.05795280782706954	6.576906218325779	0.05795280782706954
171	1.3641365886627084	0.11940264548581951	0.9019076277897203	0.09020429875197519	7.027182149018408	0.09020429875197519
172	1.351283237460158	0.10976727510918174	0.8854023161911374	0.0869460648893777	7.011519398452413	0.0869460648893777
173	1.3282106037039128	0.09938336795072718	0.9145197838208744	0.06218092906115818	6.95480796543611	0.06218092906115818
174	1.5794176558303736	0.14804166451242798	1.138121533478041	0.09008387315291023	7.402889069003831	0.09008387315291023
175	1.7146148004339767	0.1430946851103665	1.212386920844659	0.09639608175807039	7.689311581164039	0.09639608175807039
176	1.6756025957849776	0.1180087579552835	1.207500894715562	0.09193766585028441	7.584131480916207	0.09193766585028441
177	1.4591826596169897	0.1027978042648586	1.0197007979465	0.07708524030978815	7.1706087471746	0.07708524030978815
178	1.3939306890090826	0.083514322731484	1.0635662772478616	0.1160027542503296	6.874538472883677	0.1160027542503296
179	1.2101535755692752	0.10921531620916261	0.8819502744799407	0.08982707892225986	6.529277937343196	0.08982707892225986
180	1.1028636860390157	0.11433499367204877	0.7519997353309971	0.08032209267420425	6.367509415891072	0.08032209267420425
181	0.925553883658281	0.09793127514021285	0.6303764729727553	0.06423626824900473	6.0509838894774175	0.06423626824900473
182	0.8839922084203199	0.10357368940500854	0.6618276878808036	0.08058137250546478	5.797842574449273	0.08058137250546478
183	0.9666381250691073	0.1144032377676127	0.7182305863744181	0.09171604247304312	5.7945765241405285	0.09171604247304312
184	0.8859414536362628	0.10041505379383897	0.6453702879807796	0.06685700123003359	5.5969564074265366	0.06685700123003359
185	0.7616208538273815	0.08456204821308512	0.6081720955923011	0.056003377064924455	5.246123364113063	0.056003377064924455
186	0.8261526961484856	0.09506340825537248	0.6873405123492796	0.0704423013933723	5.112666575886462	0.0704423013933723
187	0.8937627806336036	0.09782813753582606	0.7171034203681782	0.0635277210868803	5.105666086395199	0.0635277210868803
188	0.7831582231949795	0.08988037145436899	0.632574891039408	0.058092441006688124	4.845349312872669	0.058092441006688124
189	0.7469841360089391	0.06412788244357158	0.6570022975017776	0.05287573020902195	4.519487286439074	0.05287573020902195
190	0.874255682912556	0.0654879753507935	0.7542624123467451	0.06028547208943928	4.4703561032905474	0.06028547208943928
191	0.8882472324576725	0.08264242924622478	0.7302085771164805	0.06314317684981569	4.430686759330661	0.06314317684981569
192	0.8281756278289643	0.06854750560257193	0.6994574278748967	0.044034177696287154	4.087041893729146	0.044034177696287154
193	0.8592278964801926	0.037981429616901034	0.758343559426281	0.04618165494822176	3.8432855498267293	0.04618165494822176
194	0.9968243460456895	0.05268692397447095	0.8560318899898683	0.04180816573009206	3.8591113415800815	0.04180816573009206
195	1.0171851402968102	0.086156952727563	0.8457109342275904	0.0407202122644841	3.7058905219700438	0.0407202122644841
196	0.9260707102373344	0.06189971877733233	0.7730735999630954	0.03647327296953418	3.3233591240949028	0.03647327296953418
197	1.0316471471537754	0.07059580952604237	0.887088190810438	0.04765190176281597	3.2155844661085755	0.04765190176281597
198	1.1820960685268718	0.11906586182501919	1.0028707030229203	0.05142277588454883	3.198512193864863	0.05142277588454883
199	1.1049540761560002	0.12456931044136753	0.8987962150209604	0.057187999170141335	2.921256623033552	0.057187999170141335
200	1.047151111174576	0.10632629042434803	0.8532126653916184	0.06894756154826036	2.6129056576398155	0.06894756154826036
201	1.2275753774616338	0.1568648014687052	1.0386081793009854	0.10678747654857453	2.564516277551132	0.10678747654857453
202	1.3389360612477554	0.197937066103962	1.1146711717930173	0.1310438121320956	2.435530180126529	0.1310438121320956
203	1.232862032538627	0.1739134872537413	0.9830811934121296	0.12170261876301858	2.146640664408689	0.12170261876301858
204	1.2881549571869655	0.21547554811626327	1.0730647756104996	0.17488961495062114	1.944023523352741	0.17488961495062114
205	1.486394221581502	0.32070139154387817	1.2886579183217044	0.2614296064890336	1.9094880530256608	0.2614296064890336
206	1.4896582774599898	0.3509055634051227	1.282152501491721	0.25288323925928985	1.7646225925455437	0.25288323925928985
207	1.4062773845077838	0.3636165825170636	1.1741194232616146	0.2541339454357618	1.515240314363463	0.2541339454357618
208	1.5396580492635528	0.49195119900147877	1.3652017130522023	0.41384375136286067	1.454708914139845	0.41384375136286067
209	1.5851874973071158	0.4954087023499973	1.5570240815266299	0.4042022773870639	1.2151080499260216	0.4042022773870639
210	1.7340063900512168	0.5732307433528555	1.863726951762878	0.5259279425735572	1.2393549368411716	0.5259279425735572
211	1.7952814936213357	0.5364044830251185	2.1707428556429513	0.28349285407933866	1.092239508438748	0.5268180041493516
212	1.9880451554132634	0.5525446118140405	2.4722795262910613	0.21650331144609278	0.9698303681273998	0.5838507258633265
213	2.427295257739551	0.5910794524606294	2.970593103142894	0.2204235505390338	1.171370634496416	0.6568728243838177
214	2.508961955568266	0.5685449616670754	3.2631898953539165	0.20835484925571798	1.1535913012975907	0.660906185162917
215	2.6964198889313002	0.6094035214370611	3.5312892710861585	0.17037340620238944	1.1301729249145123	0.7243338507453224
216	2.38319641790394	0.558834603602148	3.1975875980463466	0.14854360604891206	0.970035710081182	0.6617001694716351
217	2.1207800397125003	0.4894327597050173	3.089191948770536	0.15309001657626833	0.8321207833436777	0.5890123353626745
218	2.4153180521708557	0.5327302687243548	3.5468571382118235	0.14674791441148835	0.8666292020251946	0.6624293925637751
219	2.4566856512936988	0.5498450040969806	3.5944703433917784	0.10997669384273477	0.8376302582532871	0.6855427060477054
220	2.083542015905216	0.45900923227670987	3.2958589809985406	0.08845493242258197	0.7340454090528151	0.5894713914725561
221	2.182950405445251	0.4504549848620491	3.576837900652897	0.08983494991592017	0.776429493292985	0.6094396723286237
222	2.5144057791499503	0.5254091659029564	3.9639109776446078	0.09954154264950682	0.8323541731206875	0.7018953157604391
223	2.406315395532969	0.49696706433642446	3.859712238887067	0.08536737298227566	0.8268682454718945	0.6772659123848509
224	2.2354632326709036	0.4197999152170793	3.791980451288628	0.15472667043308214	0.9930452970376171	0.611223316922141
225	2.535383223780463	0.4658953661966394	4.218130895513528	0.15962541766554125	1.1361131477898447	0.6890841316791316
226	2.7813153013710026	0.5344879761780887	4.4879278453994065	0.14714209341417658	1.1717700685209478	0.7733468960008208
227	2.702967623202065	0.5357937262791288	4.585110876621623	0.1433225212803182	1.0180273178859738	0.7864049907374682
228	2.9722496473877733	0.5929866289906564	4.970518885927042	0.1952653369994126	1.148604833899353	0.8523981277509447
229	2.6480494416564864	0.5351226498015162	4.744052646844412	0.13557429118497732	0.9406244113671055	0.8098305463047873
230	2.359392765725357	0.47123108516271234	4.3416961746524025	0.12776089123353854	0.7858947989584407	0.7106034624278148
231	2.5828726746544097	0.520644634863049	4.532071872184101	0.2347868421723712	0.9808330758285663	0.7417685614806518
232	2.4294179662519224	0.4495507869024299	4.1882546427593565	0.22253916999244805	1.0446073238270304	0.6321209601288187
233	1.9133748616958952	0.3795746406629412	3.5951182836949864	0.07672281635474797	0.7126366275458529	0.5615874208703294
234	1.8662231815853325	0.3944328781001881	3.4861798797354417	0.11488348180419533	0.7121079019503301	0.5769393547474345
235	1.6529600544371759	0.32031478213033376	3.097844208035125	0.13982022448372722	0.7257067804052464	0.48431981097208765
236	1.5458749013316877	0.3398462347456921	2.811870589347581	0.13988447840102142	0.7034007109243885	0.43979884657307905
237	1.4695392394244406	0.3740218263849535	2.443699802783517	0.2159055551050361	0.8678560494371123	0.4072089047672921
238	1.547868216659224	0.43165405125390166	2.2993359835138607	0.2470269850092611	0.8888225128770327	0.4292331295601339
239	1.6995847574510174	0.5182803650706497	2.117070758444838	0.3235297560665671	1.0572270943082274	0.4674259060506846
240	1.8521498171649402	0.5923494280430275	2.093758203380479	0.3111611213810949	1.1098994372574436	0.5441360928768486
241	2.1817822936181765	0.6673038749668571	2.2442754827551874	0.4804526730630727	1.5386178244045834	0.6365350618904465
242	2.501837867269944	0.7816278536637639	2.4873203897071363	0.594435095782047	1.8269870360600606	0.7700480239070161
243	2.4630815973359352	0.7628242613528864	2.632918935305795	0.44323985312012093	1.663379465329231	0.7780431777931863
244	2.060752867915202	0.6053597519655223	2.4103601763248617	0.2828240121932528	1.2609056616404286	0.5915747377735476
245	1.7826321759062163	0.5399083981303827	2.2937806608294418	0.2405438818747558	0.9545396496447415	0.5274010956507991
246	1.4469759142492429	0.4374890976200523	2.1333409485201593	0.22023264600783946	0.84928913669176	0.3981359164226501
247	1.336668776374298	0.3688804103855112	2.351953809184095	0.1449939077382154	0.701450354146513	0.38705478803122667
248	1.16618949317289	0.28494688878886354	2.43213648447659	0.13573346809955128	0.721389925875766	0.3419228349868054
249	1.3064999312782366	0.26612284852781487	2.806118352090607	0.09074179425673859	0.6301666296354426	0.40398241947502217
250	1.3889696026271092	0.2565005222551482	3.1348329182662553	0.08260242337299246	0.5978295186018876	0.46368746876384415
251	1.6869751962093484	0.31314955252045473	3.554159528799009	0.08201183845817758	0.6056324683193068	0.5434463538675597
252	2.126779738733403	0.38798880139698566	4.078216435151314	0.1623057239592291	0.8078587784744472	0.6391226691734707
253	2.326704357906499	0.4820929132054259	4.41065487277257	0.2485623360436382	0.912064206683148	0.7411991629011065
254	2.937704987156708	0.7092310784913416	5.045332394231165	0.5788712342160847	1.4774086226153953	0.9188014544222622
255	3.3514355959935282	0.9290169574075331	5.439209337094339	0.877603389123205	2.003259321693407	1.0905770738613876
256	3.0176951687504086	0.6783921983549317	5.300205655356823	0.35638564263802913	1.5044534978792459	0.9577542410593518
257	2.5699433094343194	0.5838784913717735	4.891524616521467	0.27457998054275395	1.0546492413604163	0.8761568675977622
258	2.4282146349562965	0.5512169318476112	4.771278282721384	0.2800627749465311	0.9636337395478186	0.8610176140540227
259	2.0786782173684957	0.4275923758073054	4.336844795957671	0.24507092921090404	0.8400863549456719	0.7354243040302956
260	2.172585865451177	0.43748584965145865	4.413531621934642	0.1935244838998386	0.7948092736035988	0.7411110049792557
261	2.2877312860502608	0.4929509015952006	4.530882913908263	0.17263386021764607	0.8090638721714258	0.7916420529772789
262	1.9659007706919107	0.41121601645254524	4.154366701637084	0.15921993436166113	0.7214803942124196	0.7008464743654234
263	1.7433105280396681	0.339110578684405	3.8516604885523087	0.13041422267161587	0.6246589696110992	0.6201740346882787
264	2.06810755333034	0.42116953466458446	4.120949265200282	0.11570257711396649	0.666248967277173	0.6820997696578133
265	2.082412682929489	0.4393796257670585	4.102859827947346	0.11542909784596007	0.6935052017231472	0.6952912514321961
266	1.7043167924879923	0.34317050009032546	3.636706620765302	0.11805493463401573	0.6790985754780104	0.5873065239206441
267	1.796293711019049	0.3482706552796724	3.6024540862509995	0.10922318526129403	0.7080213929114282	0.561240913170043
268	2.140802552468917	0.4322633314610682	3.9126163310787394	0.08741923353328475	0.7091624073320411	0.6413542525751382
269	1.952317580770113	0.4119788129005618	3.6682682303853356	0.059495995078143425	0.6248717452380462	0.6120625481575209
270	1.7296795236502704	0.3600366325505691	3.287436797448257	0.06934730347555215	0.676345983128591	0.5254678888064229
271	2.1214586411441627	0.4376176782201902	3.576974329352168	0.09331021694475375	0.7977367931765004	0.5888255032324591
272	2.2952954048326046	0.4954493491790621	3.738325159720038	0.08818295237767237	0.7611714849508915	0.651871153504806
273	1.999762339018296	0.4555073153284377	3.3004273849668326	0.07312981412628869	0.6718684990627795	0.5890656854609327
274	2.1297540050588495	0.4612916830016943	3.2530804141999217	0.09068226647373576	0.900205940727033	0.5758967712479665
275	2.60291590589761	0.5512420008130337	3.7270124771239934	0.10788574043967045	1.0553859387574873	0.6790115864316686
276	2.562450815983356	0.5613195989535152	3.6461762055798386	0.1171648072546465	0.9453157957860626	0.6898089888283586
277	2.4098579021553497	0.5394372495336426	3.2671117127232683	0.12854641052435795	1.0030352033454788	0.629414702998244
278	2.664852326944953	0.592412800283128	3.3953744031706132	0.18204021081847624	1.3132664009199873	0.6550219430689695
279	2.6652152772386652	0.5172014811533956	3.307370600071193	0.23076804384311778	1.7567092418341037	0.5416005619679638
280	1.8974951729230112	0.49228653706775166	2.6889043638280534	0.14806961549687966	0.9451135148797687	0.5066778345152528
281	1.5790308825236679	0.4203622365639037	2.478546291387313	0.16459596595843268	0.8993925355961436	0.4169515032749405
282	1.3559021629877435	0.3382434854285336	2.5760536939189547	0.10717368877010132	0.7251615206930692	0.38218378171936085
283	1.153246384336024	0.24860198459240213	2.5611878844597986	0.1364976697522148	0.7873107539831726	0.3152198616928832
284	1.1881069739890637	0.21393342036748514	2.8789415696489193	0.10801241979605274	0.6937482394431189	0.3810926236079104
285	1.1967926714357044	0.17556359451580666	3.038134750336758	0.10661226426932549	0.6833909320154352	0.40746875273849703
286	1.4443054070026233	0.24047154105865448	3.4359599765440083	0.08743457305927503	0.6659471911896202	0.5113709149788022
287	1.6690380912872398	0.3193527560233674	3.664583077995226	0.09108438476638428	0.6744120568102089	0.5831039851970103
288	2.00736377928922	0.4127775853836639	4.126495988899102	0.11728962151937289	0.8234690733367183	0.6911075600872727
