# Supplementary material for: Energy coupling and stoichiometry of Zn2+/H+ antiport by the prokaryotic cation diffusion facilitator YiiP
Source: eLife. 2023 Oct 31;12:RP87167. doi: 10.7554/eLife.87167 (PMC10617992; doi:10.7554/eLife.87167)
Supplement: Figure 3—source data 3. — The distributions of the distances between R210 and D72. [file elife-87167-fig3-data3.csv]

	Distance	apo	holo	empty site B	D72A
0	0.1	0.0	0.0	0.0	0.0
1	0.2	0.0	0.0	0.0	0.0
2	0.30000000000000004	0.0	0.0	0.0	0.0
3	0.4	0.0	0.0	0.0	0.0
4	0.5	0.0	0.0	0.0	0.0
5	0.6000000000000001	0.0	0.0	0.0	0.0
6	0.7000000000000001	0.0	0.0	0.0	0.0
7	0.8	0.0	0.0	0.0	0.0
8	0.9	0.0	0.0	0.0	0.0
9	1.0	0.0	0.0	0.0	0.0
10	1.1	0.0	0.0	0.0	0.0
11	1.2000000000000002	0.0	0.0	0.0	0.0
12	1.3	0.0	0.0	0.0	0.0
13	1.4000000000000001	0.0	0.0	0.0	0.0
14	1.5	0.0	0.0	0.0	0.0
15	1.6	0.0	0.0	0.0	0.0
16	1.7000000000000002	0.0	0.0	0.0	0.0
17	1.8	0.0	0.0	0.0	0.0
18	1.9000000000000001	0.0	0.0	0.0	0.0
19	2.0	0.0	0.0	0.0	0.0
20	2.1	0.0	0.0	0.0	0.0
21	2.2	0.0	0.0	0.0	0.0
22	2.3000000000000003	0.0	0.0	0.0	0.0
23	2.4000000000000004	0.0	0.0	0.0	0.0
24	2.5	0.0	0.0	0.0	0.0
25	2.6	0.0	0.0	0.0	0.0
26	2.7	0.0	0.0	0.0	0.0
27	2.8000000000000003	0.0	0.0	0.0	0.0
28	2.9000000000000004	0.0	0.0	0.0	0.0
29	3.0	0.0	0.0	0.0	0.0
30	3.1	0.0	0.0	0.0	0.0
31	3.2	0.0	0.0	0.0	0.0
32	3.3000000000000003	0.0	0.0	0.0	0.0
33	3.4000000000000004	0.0	0.0	0.0	0.0
34	3.5	0.0	1.666650000166665e-06	3.406551479805963e-06	0.0
35	3.6	0.0	0.0	1.192293017932087e-05	0.0
36	3.7	0.0	8.333250000833325e-06	2.0439308878835776e-05	0.0
37	3.8000000000000003	0.0	6.66660000066666e-06	2.469749822859323e-05	0.0
38	3.9000000000000004	1.666650000166665e-06	9.99990000099999e-06	2.384586035864174e-05	3.651394102268246e-06
39	4.0	6.66660000066666e-06	9.333240000933324e-05	2.8104049708399195e-05	3.651394102268246e-06
40	4.1000000000000005	6.166605000616661e-05	0.00034666320003466633	2.7252411838447703e-05	3.651394102268246e-06
41	4.2	0.0005433279000543327	0.0009066576000906658	5.8763013026652856e-05	7.302788204536492e-06
42	4.3	0.002188311450218831	0.002253310800225331	0.000183953779909522	3.2862546920414215e-05
43	4.4	0.006399936000639993	0.004258290750425829	0.0005126859977107974	4.0165335124950704e-05
44	4.5	0.01265820675126582	0.006858264750685826	0.0010023777729329046	0.0001570099463975346
45	4.6000000000000005	0.019219807801921982	0.009911567550991157	0.00201667847604513	0.00021178085793155827
46	4.7	0.022416442502241646	0.013081535851308154	0.0030156496974982285	0.00027385455767011844
47	4.800000000000001	0.02154478455215448	0.01584650820158465	0.0038851719627187005	0.0005696174799538464
48	4.9	0.01785148815178515	0.01825648410182565	0.004543488036191203	0.00062438839148787
49	5.0	0.013578197551357819	0.019851468151985147	0.004994004469395541	0.0009238027078738662
50	5.1000000000000005	0.009253240800925324	0.02190978090219098	0.005078316618520739	0.0012889421181006909
51	5.2	0.00639160275063916	0.023349766502334977	0.005516910121545757	0.002172579490849606
52	5.300000000000001	0.004404955950440496	0.025038082952503808	0.006002343707418106	0.0036331371317569047
53	5.4	0.0032866338003286633	0.02712639540271264	0.007693696517141767	0.006032103056947143
54	5.5	0.0025649743502564972	0.029351373152935137	0.010801323104594756	0.0106365110199074
55	5.6000000000000005	0.0022316443502231643	0.03009469905300947	0.014673720499264185	0.01534315801773117
56	5.7	0.0019066476001906648	0.02875471245287547	0.01760846459911702	0.020425898608088567
57	5.800000000000001	0.0015833175001583317	0.025979740202597974	0.018149254646536217	0.022726276892517563
58	5.9	0.001243320900124332	0.021898114352189812	0.016250953834414345	0.02339813340733492
59	6.0	0.0009966567000996656	0.01820481795182048	0.013595546955905598	0.021937575766427624
60	6.1000000000000005	0.0009216574500921658	0.01686149805168615	0.010884783615850003	0.01885579914411322
61	6.2	0.0008199918000819992	0.016394836051639484	0.009075053142203086	0.016186630055355134
62	6.300000000000001	0.0007766589000776659	0.015929840701592986	0.007350486455551316	0.013287423138154147
63	6.4	0.0007299927000729993	0.015288180451528818	0.006074732926363983	0.012042297749280676
64	6.5	0.0008233251000823325	0.014341523251434153	0.0050544707581620975	0.01090671418347525
65	6.6000000000000005	0.0008083252500808325	0.014484855151448485	0.004255634436147599	0.010662070778623278
66	6.7	0.0007849921500784992	0.015249847501524985	0.0038187442088624844	0.010990696247827421
67	6.800000000000001	0.0009033243000903324	0.016906497601690648	0.0034559464762631492	0.01197292126133758
68	6.9	0.0009833235000983322	0.018248150851824817	0.0033741892407478063	0.012045949143382943
69	7.0	0.000984990150098499	0.018513148201851314	0.0034252875129448957	0.012684943111279887
70	7.1000000000000005	0.0009633237000963323	0.019538137951953815	0.0036560813757017495	0.0126374749879504
71	7.2	0.0009166575000916658	0.019891467751989148	0.003842590069221126	0.013462690055063023
72	7.300000000000001	0.0008083252500808325	0.020551461152055146	0.003915830926036954	0.014083427052448624
73	7.4	0.0006783265500678327	0.02099479005209948	0.004201129612470704	0.01540523171746973
74	7.5	0.0006749932500674993	0.02191811415219181	0.004486428298904453	0.01606978544408255
75	7.6000000000000005	0.000631660350063166	0.022326443402232644	0.004627800185316401	0.016518906918661546
76	7.7	0.0006149938500614994	0.02247977520224798	0.005034031449283261	0.016668614076854542
77	7.800000000000001	0.0006266604000626661	0.022806438602280644	0.005426636507330899	0.017303956650649217
78	7.9	0.000681659850068166	0.02228477715222848	0.005755368725132174	0.01654811807147969
79	8.0	0.0006266604000626661	0.022221444452222145	0.006056848531095002	0.016807367052740736
80	8.1	0.0006349936500634994	0.021791448752179143	0.006526952635308224	0.016245052360991427
81	8.200000000000001	0.0005883274500588328	0.02080979190208098	0.006663214694500463	0.01585800458615099
82	8.3	0.0006399936000639994	0.01968980310196898	0.006964694500463291	0.015350460805935707
83	8.4	0.0005566611000556661	0.019069809301906982	0.007052413201068294	0.015189799465435904
84	8.5	0.0005316613500531661	0.01784648820178465	0.007199746552569902	0.014240436998846159
85	8.6	0.0004933284000493329	0.01657650090165765	0.007317272578623208	0.013743847400937677
86	8.700000000000001	0.0004599954000459995	0.015568177651556818	0.007447573172725787	0.013524763754801583
87	8.8	0.00039832935003983295	0.014774852251477484	0.007765234098217692	0.0128675128163933
88	8.9	0.00038166285003816627	0.013344866551334487	0.0077337234970294875	0.01232345509515533
89	9.0	0.0003949960500394996	0.012071545951207154	0.007768640649697498	0.011819562709042313
90	9.1	0.00042332910004233294	0.010823225101082322	0.008024983648552897	0.011359487052156513
91	9.200000000000001	0.00042999570004299955	0.009739902600973991	0.008080340110099744	0.011235339652679394
92	9.3	0.0004933284000493329	0.00864991350086499	0.008118663814247562	0.011078329706281859
93	9.4	0.0005799942000579994	0.007321593450732159	0.008593026107810542	0.010760658419384521
94	9.5	0.000631660350063166	0.006348269850634827	0.009178101324467215	0.01024216045686243
95	9.600000000000001	0.000751659150075166	0.005524944750552495	0.009548563797896113	0.010150875604305724
96	9.700000000000001	0.0008499915000849992	0.004929950700492995	0.010274159263094784	0.00953379000102239
97	9.8	0.0008966577000896657	0.004136625300413662	0.01051176622881125	0.009329311931295369
98	9.9	0.0011116555501111656	0.0038032953003803295	0.011051704638360495	0.009000686462091227
99	10.0	0.0011599884001159987	0.003299967000329997	0.011266317381588271	0.008518702440591818
100	10.100000000000001	0.0013066536001306653	0.0027949720502794973	0.011464749005286969	0.008376298070603356
101	10.200000000000001	0.001443318900144332	0.0024449755502444974	0.01146560064315692	0.00784684592577446
102	10.3	0.001721649450172165	0.0021966447002196646	0.011773041914209408	0.007766515255524559
103	10.4	0.002174978250217498	0.0020749792502074977	0.012433912901291764	0.007434238392218149
104	10.5	0.0027766389002776637	0.001726649400172665	0.013221677930996894	0.007094658740707202
105	10.600000000000001	0.0037582957503758297	0.0015883174501588318	0.013872329263639831	0.007167686622752567
106	10.700000000000001	0.005278280550527828	0.0014266524001426651	0.014092051834087316	0.006988768311741423
107	10.8	0.007558257750755826	0.0012549874501254987	0.014406306208099417	0.006459316166912527
108	10.9	0.00990490095099049	0.0012166545001216654	0.014274302338256935	0.006280397855901383
109	11.0	0.012384876151238488	0.0011916547501191655	0.013773539270725459	0.006375334102560358
110	11.100000000000001	0.013984860151398486	0.000979990200097999	0.013220826293126941	0.0058896986869586805
111	11.200000000000001	0.014296523701429652	0.0010266564001026655	0.012783084427971875	0.00584953335183373
112	11.3	0.013116535501311654	0.000939990600093999	0.012702178830326484	0.0057874596520951695
113	11.4	0.010914890851091489	0.000934990650093499	0.012783084427971875	0.005648706676208977
114	11.5	0.008688246450868825	0.0009566571000956657	0.012879319507276395	0.005046226649334716
115	11.600000000000001	0.00676659900067666	0.0007799922000779992	0.013279589306153595	0.005298172842391225
116	11.700000000000001	0.004964950350496495	0.0008583247500858325	0.01317909603749932	0.00510099756086874
117	11.8	0.0038882944503888296	0.0008933244000893325	0.013265111462364419	0.0047102983919260375
118	11.9	0.00318830145031883	0.0008549914500854992	0.012924456314383824	0.004348810375801481
119	12.0	0.002646640200264664	0.0008766579000876658	0.01259742737232245	0.004462003592971797
120	12.100000000000001	0.0024949750502494977	0.0008399916000839992	0.012106883959230392	0.004166240670688068
121	12.200000000000001	0.002288310450228831	0.0007116595500711659	0.01153373167275304	0.00376823871354083
122	12.3	0.002368309650236831	0.0007583257500758326	0.010508359677331445	0.0036586968904727827
123	12.4	0.002496641700249664	0.0007283260500728327	0.010011003161279773	0.003505338338177516
124	12.5	0.0023599764002359977	0.0007399926000739993	0.0091976889954761	0.003326420027166372
125	12.600000000000001	0.002561641050256164	0.0006799932000679993	0.008834039625006814	0.0034213562738253465
126	12.700000000000001	0.0026783065502678305	0.000651660150065166	0.00822086035864174	0.0030927308046212044
127	12.8	0.0027383059502738305	0.0005283280500528328	0.007961110808306535	0.002994143163859962
128	12.9	0.0029283040502928303	0.0005599944000559995	0.007593203248487491	0.002786013700030672
129	13.0	0.0031366353003136637	0.0005816608500581661	0.007238921894587671	0.0026326551477354053
130	13.100000000000001	0.00330330030033033	0.0005333280000533328	0.00700983130757072	0.002672820482860356
131	13.200000000000001	0.003406632600340663	0.0005299947000529995	0.006894008557257318	0.002676471876962624
132	13.3	0.003656630100365663	0.0005116615500511661	0.006648736850711288	0.002629003753633137
133	13.4	0.004048292850404829	0.0005483278500548328	0.006596786940644247	0.00243547986621292
134	13.5	0.004373289600437329	0.0005833275000583328	0.0064196462636943365	0.002493902171849212
135	13.600000000000001	0.004566621000456662	0.0005399946000539995	0.006289345669591759	0.0023551491959630188
136	13.700000000000001	0.004749952500474996	0.0005649943500564994	0.006127534474300976	0.0022784699198153857
137	13.8	0.004839951600483995	0.0005416612500541661	0.006254428516923748	0.0024865993836446754
138	13.9	0.005238280950523828	0.0005466612000546661	0.0059997887938082525	0.0022675157375085806
139	14.0	0.005558277750555828	0.0005216614500521662	0.006082397667193547	0.0020812946382929003
140	14.100000000000001	0.005554944450555495	0.00044666220004466623	0.0061113533547718975	0.0021506711262359967
141	14.200000000000001	0.006029939700602994	0.0003899961000389996	0.0059384708671717445	0.002241955978792703
142	14.3	0.006249937500624993	0.000328330050032833	0.005750258897912465	0.0022200476141790936
143	14.4	0.006629933700662993	0.0003099969000309997	0.005677869678966588	0.0022200476141790936
144	14.5	0.007013263200701327	0.00024499755002449974	0.005515206845805854	0.0019790556034293893
145	14.600000000000001	0.007791588750779159	0.00022833105002283312	0.005298890826838175	0.0018476054157477325
146	14.700000000000001	0.008089919100808992	0.00018999810001899982	0.005182216438654821	0.0020119181503498035
147	14.8	0.008796578700879657	0.00015666510001566652	0.005180513162914918	0.001854908203952269
148	14.9	0.009398239350939823	0.00015833175001583318	0.004811753965225923	0.0017636233513955628
149	15.0	0.009746569200974657	0.00012499875001249989	0.004839858014934322	0.0017818803219069041
150	15.100000000000001	0.01005489945100549	0.0001049989500104999	0.004715518885921404	0.0018366512334409277
151	15.200000000000001	0.010204897951020489	7.16659500071666e-05	0.004549449501280864	0.001796485898315977
152	15.3	0.010051566151005156	9.166575000916657e-05	0.004434478388837412	0.0015554938875662729
153	15.4	0.009796568700979657	8.333250000833325e-05	0.004158547718973129	0.001588356434486687
154	15.5	0.009128242050912824	7.333260000733326e-05	0.004184948492941625	0.0013656213942483241
155	15.600000000000001	0.008566581000856659	8.833245000883325e-05	0.003969484111843898	0.0015408883111571999
156	15.700000000000001	0.0078065886007806585	7.833255000783326e-05	0.0037727557638851036	0.001515328552441322
157	15.8	0.007424925750742492	9.333240000933324e-05	0.003481495612361694	0.0014459520644982255
158	15.9	0.00695159715069516	8.833245000883325e-05	0.003326497520030523	0.0013729241824528605
159	16.0	0.00658660080065866	6.499935000649993e-05	0.0031229560691121163	0.0013656213942483241
160	16.1	0.00630160365063016	6.333270000633328e-05	0.0030369406442470157	0.0012779879357938861
161	16.2	0.0062699373006269935	3.166635000316664e-05	0.00283936065841827	0.001263382359384813
162	16.3	0.006148271850614827	5.999940000599994e-05	0.002613676622881125	0.0013583186060437875
163	16.400000000000002	0.00627160395062716	5.1666150005166616e-05	0.0025012604240475284	0.00124877678297574
164	16.5	0.006398269350639827	3.8332950003833295e-05	0.0022849444050798496	0.0012013086596462529
165	16.6	0.006669933300666993	3.666630000366663e-05	0.0022679116476808196	0.0012414739947712037
166	16.7	0.006719932800671994	2.999970000299997e-05	0.0022057420831743607	0.001230519812464399
167	16.8	0.007149928500714993	4.333290000433329e-05	0.0021929675151250885	0.001336410241430178
168	16.900000000000002	0.006954930450695493	3.999960000399996e-05	0.002045634163623481	0.0013291074532256416
169	17.0	0.007148261850714826	2.8333050002833306e-05	0.0020924742464708125	0.0012743365416916178
170	17.1	0.007089929100708993	3.166635000316664e-05	0.002013271924565324	0.00139483254706647
171	17.2	0.007089929100708993	1.999980000199998e-05	0.002008162097345615	0.0014934201878277127
172	17.3	0.007456592100745659	2.1666450002166646e-05	0.001996239167166294	0.001482466005520908
173	17.400000000000002	0.007548257850754826	2.8333050002833306e-05	0.0018591254701041042	0.0015226313406458585
174	17.5	0.007674923250767492	1.333320000133332e-05	0.001777368234588761	0.0015408883111571999
175	17.6	0.007501591650750159	1.1666550001166655e-05	0.0018156919387365782	0.0015956592226912235
176	17.7	0.007661590050766159	1.666650000166665e-05	0.0017654453044094402	0.001588356434486687
177	17.8	0.007548257850754826	4.999950000499995e-06	0.0017364896168310896	0.001734412198577417
178	17.900000000000002	0.007716589500771659	8.333250000833325e-06	0.0016104472120782689	0.0017234580162706122
179	18.0	0.007884921150788492	8.333250000833325e-06	0.0016777266038044366	0.001898724933179488
180	18.1	0.008083252500808324	4.999950000499995e-06	0.0015414645446121982	0.0017307608044751486
181	18.2	0.00790158765079016	4.999950000499995e-06	0.0014971793753747206	0.0019315874800999021
182	18.3	0.008124918750812492	3.33330000033333e-06	0.001374543522101706	0.0017818803219069041
183	18.400000000000002	0.00784658820078466	3.33330000033333e-06	0.001322593612034665	0.0018950735390772197
184	18.5	0.008166585000816658	1.666650000166665e-06	0.0012587207717883033	0.0017891831101114405
185	18.6	0.007919920800791992	0.0	0.0011062775930669865	0.0017636233513955628
186	18.7	0.008089919100808992	4.999950000499995e-06	0.001043256390690576	0.0017563205631910264
187	18.8	0.008093252400809325	0.0	0.0009376532948165913	0.0016723384988388567
188	18.900000000000002	0.007968253650796826	1.666650000166665e-06	0.000820978906633237	0.0016212189814071012
189	19.0	0.007774922250777493	0.0	0.0007664740829563416	0.0017161552280660756
190	19.1	0.00790158765079016	0.0	0.0007485896876873603	0.001840302627543196
191	19.200000000000003	0.007584924150758492	0.0	0.0006685357279119202	0.0018439540216454641
192	19.3	0.0075332580007533255	0.0	0.0006676840900419688	0.0019388902683044385
193	19.400000000000002	0.007433259000743326	0.0	0.0006804586580912411	0.0018183942629295866
194	19.5	0.007434925650743492	0.0	0.000692381588270562	0.0018585595980545372
195	19.6	0.0069049309506904934	0.0	0.000683865209571047	0.002030175120861145
196	19.700000000000003	0.007031596350703159	0.0	0.00072559546519867	0.001825697051134123
197	19.8	0.006753265800675327	0.0	0.0007639191693464872	0.0019060277213840244
198	19.900000000000002	0.0068915977506891594	0.0	0.0008056494249741102	0.001719806622168344
199	20.0	0.00661160055066116	0.0	0.0008456764048618303	0.0019754042093271212
200	20.1	0.00647660190064766	0.0	0.0008661157137406661	0.0018476054157477325
201	20.200000000000003	0.006234937650623494	0.0	0.0008516378699514908	0.0020703404559860956
202	20.3	0.006121605450612161	0.0	0.0008584509729111027	0.0020374779090656815
203	20.400000000000002	0.006166605000616661	0.0	0.0008397149397721699	0.0020009639680429988
204	20.5	0.006176604900617661	0.0	0.0008541927835613452	0.0018293484452363913
205	20.6	0.005813275200581327	0.0	0.0008414182155120728	0.0021287627616223873
206	20.700000000000003	0.005856608100585661	0.0	0.0008218305445031885	0.0019242846918953657
207	20.8	0.005508278250550828	0.0	0.000779248651005614	0.0020009639680429988
208	20.900000000000002	0.005516611500551661	0.0	0.0007766937373957595	0.0018220456570318547
209	21.0	0.005294947050529495	0.0	0.0007801002888755654	0.001767274745497831
210	21.1	0.005266614000526661	0.0	0.0007605126178666812	0.0017052010457592709
211	21.200000000000003	0.005171614950517161	0.0	0.0007136725350193492	0.0017453663808842217
212	21.3	0.004841618250484162	0.0	0.0007017496048400283	0.0017709261396000994
213	21.400000000000002	0.0045832875004583285	0.0	0.0006974914154902709	0.0016686871047365884
214	21.5	0.004469955300446996	0.0	0.0006881233989208045	0.0016285217696116376
215	21.6	0.004343289900434329	0.0	0.0006506513326429389	0.0015189799465435904
216	21.700000000000003	0.004114958850411496	0.0	0.0006174374557148308	0.001467860429111835
217	21.8	0.0038882944503888296	0.0	0.0005842235787867226	0.0013619700001460558
218	21.900000000000002	0.0036316303503631632	0.0	0.0005731522864773533	0.0013583186060437875
219	22.0	0.00345829875034583	0.0	0.0005561195290783235	0.0013108504827143003
220	22.1	0.003456632100345663	0.0	0.00054845478824876	0.001263382359384813
221	22.200000000000003	0.003214967850321497	0.0	0.0005365318580694391	0.0012852907239984225
222	22.3	0.003149968500314997	0.0	0.0004496647953343871	0.0011209779893963515
223	22.400000000000002	0.002941637250294164	0.0	0.00041645091840627894	0.0010771612601691326
224	22.5	0.0028316383502831636	0.0	0.00039090178230773425	0.0011757489009303751
225	22.6	0.002666640000266664	0.0	0.00038238540360821933	0.0010589042896577913
226	22.700000000000003	0.0024099759002409976	0.0	0.0003108478225322941	0.0009858764076124263
227	22.8	0.0024449755502444974	0.0	0.00029636997874311877	0.0009676194371010852
228	22.900000000000002	0.0021966447002196646	0.0	0.0002478266201558838	0.0009384082842829393
229	23.0	0.0022599774002259976	0.0	0.0002129094674878727	0.0007887011260899412
230	23.1	0.0020183131502018313	0.0	0.00019587671008884286	0.00083251785531716
231	23.200000000000003	0.0019916467501991646	0.0	0.0001924701586090369	0.0008179122789080871
232	23.3	0.0019299807001929982	0.0	0.000138816972802093	0.0007777469437831364
233	23.400000000000002	0.001726649400172665	0.0	0.00013966861067204447	0.0007594899732717952
234	23.5	0.0016933164001693317	0.0	8.26088733852946e-05	0.0007740955496808681
235	23.6	0.0015399846001539984	0.0	8.26088733852946e-05	0.0007083704558400397
236	23.700000000000003	0.001751649150175165	0.0	7.238921894587672e-05	0.0005878744504651876
237	23.8	0.0015999840001599984	0.0	6.131792663650734e-05	0.0005002409920107497
238	23.900000000000002	0.0014649853501464986	0.0	4.59884449773805e-05	0.0006134342091810653
239	24.0	0.0014549854501454986	0.0	4.173025562762305e-05	0.0005769202681583828
240	24.1	0.0013249867501324987	0.0	2.384586035864174e-05	0.0005075437802152862
241	24.200000000000003	0.001293320400129332	0.0	3.2362239058156645e-05	0.0004527728686812625
242	24.3	0.0011599884001159987	0.0	1.6181119529078323e-05	0.0004965895979084815
243	24.400000000000002	0.0011366553001136656	0.0	1.8736033138932795e-05	0.0004856354156016767
244	24.5	0.001054989450105499	0.0	1.192293017932087e-05	0.0004272131099653848
245	24.6	0.0010466562001046657	0.0	2.2142584618738757e-05	0.0003578366220222881
246	24.700000000000003	0.0008616580500861659	0.0	1.0219654439417888e-05	0.00037609359253362935
247	24.8	0.000904990950090499	0.0	1.1071292309369379e-05	0.0003578366220222881
248	24.900000000000002	0.0007666590000766659	0.0	1.2774568049272361e-05	0.0002994143163859962
249	25.0	0.0007416592500741659	0.0	1.0219654439417888e-05	0.0003505338338177516
250	25.1	0.0007399926000739993	0.0	1.1071292309369379e-05	0.00024829479895424074
251	25.200000000000003	0.0006199938000619994	0.0	1.4477843789175342e-05	0.00027385455767011844
252	25.3	0.000586660800058666	0.0	9.368016569466398e-06	0.0002702031635678502
253	25.400000000000002	0.0005466612000546661	0.0	6.813102959611926e-06	0.00028115734587465496
254	25.5	0.0004916617500491661	0.0	8.516378699514907e-06	0.00024829479895424074
255	25.6	0.0005383279500538328	0.0	1.3626205919223851e-05	0.00020447806972702178
256	25.700000000000003	0.0003749962500374996	0.0	1.0219654439417888e-05	0.00016431273460207108
257	25.8	0.00043166235004316625	0.0	1.5329481659126834e-05	0.00014605576409072984
258	25.900000000000002	0.0004183291500418329	0.0	9.368016569466398e-06	0.0001497071581929981
259	26.0	0.00034666320003466633	0.0	9.368016569466398e-06	0.00013145018768165686
260	26.1	0.00031666350003166637	0.0	1.192293017932087e-05	0.00010954182306804738
261	26.200000000000003	0.00028833045002883305	0.0	8.516378699514907e-06	9.128485255670616e-05
262	26.3	0.00022999770002299976	0.0	1.192293017932087e-05	8.033067024990141e-05
263	26.400000000000002	0.0002516641500251664	0.0	9.368016569466398e-06	7.302788204536492e-05
264	26.5	0.00019333140001933315	0.0	1.5329481659126834e-05	6.572509384082843e-05
265	26.6	0.00019166475001916648	0.0	1.192293017932087e-05	8.398206435216965e-05
266	26.700000000000003	0.00016999830001699983	0.0	7.664740829563417e-06	5.477091153402369e-05
267	26.8	0.00013666530001366653	0.0	1.3626205919223851e-05	5.1119517431755445e-05
268	26.900000000000002	9.333240000933324e-05	0.0	1.4477843789175342e-05	4.381672922721895e-05
269	27.0	9.666570000966658e-05	0.0	1.5329481659126834e-05	5.1119517431755445e-05
270	27.1	7.499925000749992e-05	0.0	1.192293017932087e-05	4.0165335124950704e-05
271	27.200000000000003	7.16659500071666e-05	0.0	1.2774568049272361e-05	4.0165335124950704e-05
272	27.3	6.833265000683327e-05	0.0	1.192293017932087e-05	3.2862546920414215e-05
273	27.400000000000002	5.8332750005833273e-05	0.0	1.4477843789175342e-05	2.1908364613609475e-05
274	27.5	4.499955000449995e-05	0.0	1.3626205919223851e-05	3.651394102268246e-05
275	27.6	5.4999450005499945e-05	0.0	7.664740829563417e-06	3.2862546920414215e-05
276	27.700000000000003	3.666630000366663e-05	0.0	9.368016569466398e-06	1.4605576409072984e-05
277	27.8	3.166635000316664e-05	0.0	1.3626205919223851e-05	1.0954182306804737e-05
278	27.900000000000002	2.666640000266664e-05	0.0	4.258189349757454e-06	7.302788204536492e-06
279	28.0	3.166635000316664e-05	0.0	3.406551479805963e-06	0.0
280	28.1	1.666650000166665e-05	0.0	0.0	0.0
281	28.200000000000003	2.666640000266664e-05	0.0	3.406551479805963e-06	3.651394102268246e-06
282	28.3	2.333310000233331e-05	0.0	5.961465089660435e-06	3.651394102268246e-06
283	28.400000000000002	1.8333150001833314e-05	0.0	2.554913609854472e-06	0.0
284	28.5	1.999980000199998e-05	0.0	3.406551479805963e-06	3.651394102268246e-06
285	28.6	1.666650000166665e-05	0.0	8.516378699514907e-07	7.302788204536492e-06
286	28.700000000000003	1.4999850001499985e-05	0.0	1.7032757399029814e-06	0.0
287	28.8	9.99990000099999e-06	0.0	1.7032757399029814e-06	0.0
288	28.900000000000002	1.999980000199998e-05	0.0	8.516378699514907e-07	3.651394102268246e-06
289	29.0	9.99990000099999e-06	0.0	0.0	0.0
290	29.1	1.333320000133332e-05	0.0	8.516378699514907e-07	0.0
291	29.200000000000003	3.33330000033333e-06	0.0	0.0	3.651394102268246e-06
292	29.3	1.1666550001166655e-05	0.0	0.0	0.0
293	29.400000000000002	4.999950000499995e-06	0.0	0.0	0.0
294	29.5	9.99990000099999e-06	0.0	0.0	0.0
295	29.6	4.999950000499995e-06	0.0	0.0	0.0
296	29.700000000000003	4.999950000499995e-06	0.0	0.0	0.0
297	29.8	9.99990000099999e-06	0.0	0.0	0.0
298	29.900000000000002	6.66660000066666e-06	0.0	8.516378699514907e-07	0.0
299	30.0	3.166635000316664e-05	0.0	1.7032757399029814e-06	0.0
