# Supplementary material for: Energy coupling and stoichiometry of Zn2+/H+ antiport by the prokaryotic cation diffusion facilitator YiiP
Source: eLife. 2023 Oct 31;12:RP87167. doi: 10.7554/eLife.87167 (PMC10617992; doi:10.7554/eLife.87167)
Supplement: Figure 3—source data 4. — Angles between the TMD and CTD. [file elife-87167-fig3-data4.csv]

time	holo md0	holo md1	holo md2	D72A md0	D72A md1	D72A md2	empty site B md0	empty site B md1	empty site B md2	empty site B md3	empty site B md4	empty site B md5
0.0	1.6189505334472938	1.6189505334472938	1.6189505334472938	0.7694233867156274	0.7694233867156274	0.7694233867156274	0.9286759730945562	0.9286759730945562	0.9286759730945562	0.9286759730945562	0.9286759730945562	0.9286759730945562
0.01	2.901524299273457	4.866719257276525	2.651040853301122	2.985937783609264	3.4195911233022973	2.713265504021383	3.4205179550909555	5.630558943130248	0.713632671842401	4.356612724600871	2.0793797617890153	2.127902870886088
0.02	4.094825895565383	5.272266181301298	4.089455024304744	3.8618040892363914	1.2255324388478324	3.851221194445884	5.353137848313107	6.718672868869881	2.780231883582101	4.24501251717159	3.1450635123433734	3.2135366126351776
0.03	2.537757308353228	3.5091623008098067	6.140632410592837	5.005821276640728	0.6807656814671554	4.1597496042758895	4.5773464669687876	5.440012562787686	2.8364708214287457	4.5290961338699836	4.606876941785848	2.6332741229781282
0.04	1.4684333359769846	2.382669949066312	8.427964276022898	6.643975828781777	1.887644514670601	3.703158770948687	7.9247405908388835	5.331439215816414	4.269175475084353	5.0078663794626195	4.771104839979759	4.906857086793857
0.05	3.651840526695748	4.818216100911021	8.466205886709895	7.794180555927266	1.6271848890264766	3.554207627466	8.240204683877764	2.7793432211426135	1.9790478471557407	3.5914039519148906	6.082664351306463	6.066330894207048
0.06	2.4373250961883395	1.9749371268135827	8.555578174332183	9.75538842515745	2.7687363638489506	3.8927111367004144	8.658638001499353	4.212736264483119	2.892803368230958	4.17979081753355	3.9395882875200194	6.559885836917311
0.07	1.08236649539964	1.0737158501363324	3.9460091326641797	9.069659562570084	1.7598916929136166	4.854392617772321	8.466060611107455	4.40014613333804	4.072767176041966	5.9079812864990355	3.704894392676466	9.222688559949022
0.08	3.232214629424046	2.2850054379810816	3.4852134448461802	7.404941195892383	3.684766591455931	3.8822614249247827	7.698783900751881	5.200418734333646	4.285025044203645	8.049933394215165	5.668370650517673	8.143878339220715
0.09	3.5696843472643236	2.407693268022187	3.1780542143728536	4.616983936571647	4.037895277038919	5.210448418682503	5.331200300187308	4.946050876098999	4.887589473553723	9.491498143919033	3.796110921867676	8.73906406407669
0.1	4.48382450228748	3.269863562650957	5.646970991452826	7.993430101207123	4.112451825257919	6.501135391299466	6.16882246640268	3.477386096662647	4.4184765829528185	8.636369522475587	3.9175724673848924	4.531163477294263
0.11	4.8079311827715445	4.51702736832593	4.444126868130256	8.317776379748192	6.607882048424453	6.972783054264947	7.499639483152112	4.1355163393942	6.923813266064357	9.800234150986398	5.497308325314782	6.539926727973322
0.12	5.481628875618154	4.274760858139369	6.282982396689409	6.121079821628715	6.109384845866657	6.971773370695452	9.910061867498792	3.9164145870346605	8.768623205491034	10.476994239120764	2.4438173196707496	6.7977005075802985
0.13	2.519942512369251	4.331240471706383	6.157016120836401	5.742370957908413	5.272589743293991	9.649132819550925	12.683419643199331	5.531802520000919	6.902866994337314	11.508897478957751	4.321740893442832	9.948312639896379
0.14	3.887817892819001	5.760932937324829	6.714113759985994	4.615264927347553	4.5484684650419895	9.966874075787793	12.120978824273731	8.038120961745427	7.373764095390579	10.215122742182938	2.8823073274160405	10.055461470975846
0.15	6.264550977716607	4.405136161223116	7.520826664327287	6.1925219174834165	4.951373796239866	7.629712030767445	10.458226720659171	8.519766241865034	5.907404763752637	12.137896012479443	4.305624471521385	9.585545083166746
0.16	7.4550299713956445	3.42392244302682	5.797260296741067	6.080864985256907	7.0792851792055504	6.842536533244379	12.238832700544275	6.150041244249514	5.84341661753043	9.728304555589686	4.049171785978104	10.206946884142408
0.17	6.3764041024670455	1.8533962392912902	6.070703177110551	6.667403017735773	5.981921943541193	5.156247970364403	14.00546645549169	6.777549195719405	9.121999373859895	10.778483311758691	4.0549772756223454	11.76810956529145
0.18	6.155487005308729	3.427574963101476	5.643049779769014	5.71577074183159	6.2616535028941165	7.475337605926365	12.134439608592464	9.084282040511669	10.534211114610274	8.861952230665299	4.659402832606504	7.8637605297265525
0.19	7.599968933554873	5.802485954998425	3.783510270282739	4.941379934623365	6.513797201615663	6.896563517222648	12.593780005259275	9.463219362430895	7.06987032975637	9.626464644184539	5.394034756407307	7.8972768595015665
0.2	7.913196202727032	4.57344884958585	4.611022741983513	6.902623693003048	5.463786184908253	4.804628839110563	12.105838069965664	9.706244198116641	8.033679477279472	11.37747692960562	4.413535998536459	7.980434333098536
0.21	5.2250835711589785	3.9006556063787325	5.486504742615773	6.675235703810785	5.094369187215859	5.712190205180888	10.928980155878978	9.679917083220793	9.316159300307424	10.508872656888265	4.542157572940763	7.840648754793873
0.22	9.029058879222308	3.9872484008155005	6.297685372175476	5.404838064656432	5.578640114238457	8.455333823406669	9.999545525308019	8.104834809973907	8.315444881619301	11.604158303742063	6.2096179172297985	9.392651648757797
0.23	10.214428263162686	4.723505025286122	7.151357127912568	2.979153122798707	8.099331441820913	9.1082079881709	11.446363870871561	5.293855519428727	8.393641829553474	9.376338238859038	6.4884820349430665	8.60187815147536
0.24	9.46111403671064	6.433394599505959	6.8770648985032015	5.136825994048764	4.711515590485703	10.273573242425078	13.333036352537356	7.248323091147706	10.41279673866301	7.594678947530739	9.134844790009641	8.474768167219345
0.25	8.08639290902546	5.832398226565301	6.330601538270665	3.447427212752047	5.996577886247909	8.329545219789132	12.482383526131361	6.1854237955818805	11.9980747125153	7.674316991597034	8.237836193439799	8.017606287438705
0.26	5.94263060419866	3.468880544423421	6.916328516973277	6.771217382212431	4.729543826529675	7.571193318697514	11.500973941328455	5.598321367568678	10.811346939755595	7.9078742356474105	10.443498105738355	8.606768646303863
0.27	6.6940645006266095	3.0886656548422096	5.858960512786042	6.740386036339678	5.9038667631587485	5.0874522282500845	12.841537095753749	5.351027350127117	12.705460850495022	8.768707776821952	10.351468744615183	8.563202814201325
0.28	9.704942895140258	1.242311396361746	3.5750928746002275	6.896857951290939	5.906545531501116	6.167031170195685	14.96773789915103	5.116429856076135	14.256062501600573	9.08352453320176	9.424403184815933	8.605263885423398
0.29	8.357752020737513	2.0160881224119076	1.6958783253083842	7.6292178827854205	7.7846572916545265	3.4690553921612595	13.884880417628768	3.2170189694354634	15.13568333614926	9.901164856689062	9.713836427461388	7.358671155705974
0.3	8.056186418983412	1.6384868860541655	4.565585997738039	8.957649470864503	7.400396503607192	6.88427738961932	13.166775340927044	2.0649753045764534	12.69349629073118	10.235261880079163	10.565962560168352	5.94398374894978
0.31	6.928643629254821	4.39244756654549	6.601186590870291	9.131724843371634	7.632661608409776	9.97968144476844	13.699009405487795	1.7365813193195072	11.878059557006459	9.842359183212317	11.744723181820746	8.103323532752688
0.32	5.456491450186933	3.5425926158465915	7.677986624767078	7.585228267252717	7.346033776620628	8.436935585142615	13.312830835421721	2.9470791165833994	10.727649929800336	11.96257919628332	9.571471060306544	7.1932200549629535
0.33	5.432811114596383	5.311832844436455	8.996049520121304	8.107139891097447	6.418216048632337	8.34959326768183	11.59733313839433	5.013238168220085	11.567492048061736	12.65545561920996	13.24456097707509	7.29807012747415
0.34	4.674101585379153	4.860557904836341	9.79501591817155	9.796889572779325	7.174283258458122	5.721835284664669	11.750893081551876	4.863029752894837	12.211963360922107	12.378847931986035	13.90117278597528	9.995375257505968
0.35000000000000003	5.294765806802174	5.314679153491268	10.448888944026328	6.74482601628684	6.200270553959275	8.544581495878617	9.700127104883661	3.946446358647804	8.78054392544382	12.781609281027384	13.15957410010988	11.275252147965704
0.36	4.8102400961816745	4.779224100746126	10.040481603207496	7.53417411029352	7.1207706589569	8.067890812894081	10.279221219030614	3.6356459912857884	9.009332596891749	12.296902891926443	13.190909857463986	11.31268706074063
0.37	3.8410287171646504	4.527604321677622	10.550257950564822	7.327334397370233	4.9976947739141355	7.237642166132894	12.69514232692259	2.5469807173717527	11.733706912505395	11.515750473493746	12.059125063631967	11.46260778707596
0.38	3.9667055132880304	5.425265659700519	11.705481581660647	7.646598502379655	3.1914907276004865	8.828425455068327	12.803318583415251	3.886375772980116	10.282234393566762	12.60548816038495	12.203156281110818	9.964864353093931
0.39	5.910980513531231	6.568999682273326	12.164405951455626	8.05998866343358	4.946868866753326	9.585017847286275	13.40695568773598	4.244079007927024	10.025124159552398	11.851277641546613	9.402509991545031	10.032363870130947
0.4	5.894349102660655	5.53426547883181	11.470449745388256	10.980593519830636	6.037566607324536	9.578380219562515	15.92337510456526	1.8216624639770438	8.600536920244569	10.415255339856664	10.268513246462415	9.108416340095731
0.41000000000000003	3.86871647761327	5.565828343097523	12.798052067088943	10.388040467584354	6.621717687990815	6.730505203819138	16.298187138016058	2.165432436365306	6.679717670688256	10.374548511290103	11.471020966295905	10.149410936681287
0.42	5.600497387992776	7.554184855269988	11.091042375117778	10.098523979813258	6.2702700689587845	9.818212078731326	13.820145140641594	2.1190398523001757	6.084827132419407	12.617649580799768	10.93534622824412	9.287832773350505
0.43	5.071556462705245	7.193111378614366	10.936264761578709	8.626088724834416	4.406145346805751	7.809739440737001	14.429789875396086	2.878181545638824	8.704562956264745	12.35150302335516	12.283122567520262	10.453339993812065
0.44	6.35058804478992	4.997138839597452	10.18546630962462	10.509933419672475	6.465734537246489	8.008595684704295	15.519914873191668	3.705707045925282	8.683370551147537	9.959818330075763	10.930925274808509	9.787492107991717
0.45	6.640691751222917	6.419176834342788	11.933501296460028	7.940317125584298	4.758830262235901	7.774075114843109	16.80124023247805	4.632506571736708	9.776617657518932	8.04537384769883	11.010987251800179	8.277912733720969
0.46	5.906315798408747	4.568881234981019	9.677059817168459	7.501468393841871	6.201264503556423	8.503636778180645	17.999089797937867	4.841529630654548	9.793146424571404	8.85542014225074	10.201043857418204	8.48509698489886
0.47000000000000003	3.617430991144992	5.590535871275184	9.710629648498442	7.945769940355646	3.4929859641513605	10.577643344045194	15.570011598030016	4.34311338775497	10.210101066983988	8.85516964459581	13.269381454355269	6.946760980953445
0.48	3.574608174231312	9.07717416173635	10.866681050656078	7.312982945412588	4.439108088421131	8.951019258684493	16.688834259896108	3.744485494957685	13.175494331142863	6.245800893329669	14.291034244785667	7.637088101337193
0.49	3.771538356108798	7.4120749892020905	11.528883379487755	5.499706996326627	3.314298199672167	10.228292990963967	17.23458510874114	4.578238374875638	12.599687215442943	8.776685965346715	12.592225024201612	9.569113572999688
0.5	5.813590748774026	10.006092593221078	11.909953138535872	7.2463124835674035	4.67886089670828	9.288527245376795	16.453269908843104	4.738277303326672	12.855727710815982	8.590780067151233	11.761185378290063	10.070969539173074
0.51	4.557871905189593	10.118609422649044	10.651375333305275	7.5108964321931255	5.6693765801357445	10.098888906141184	17.50315649348883	4.337320993310152	12.96750502099721	8.228061670633394	12.202969522721181	8.918420633350474
0.52	2.934245658330658	9.712473651423915	9.758717546716074	7.110632447057592	4.5081662922213965	9.38674604126686	19.700195373124114	6.740479806465463	13.81441376595408	8.11104046323197	11.24229628610407	9.407255551995629
0.53	3.083478798329622	8.340327290923346	11.026265333782591	10.412091064666862	4.225446993266405	8.575968463519944	20.62183806652539	5.983086918829598	14.499488214602525	8.131132378138815	11.09444338440592	9.294356291647283
0.54	3.016417147768204	7.569081666549996	10.632982797587669	11.953737095526996	6.631833031267856	10.313887605938051	20.09119006047112	6.160349960545077	14.341945467470273	10.455572627196034	12.747587150829524	8.840741974269845
0.55	3.740349774175718	10.175987134775779	11.52624469191901	9.738160300398691	6.215091050342787	8.176360694276823	18.28970381004994	7.424717150921992	13.571167764666116	9.314754927262067	13.037264032516672	9.660520281284553
0.56	2.543973751054404	8.962641824894076	12.617483027203143	11.754068525325401	8.34492704522623	9.394109410868644	16.31455354954059	4.7865505243278434	14.705606448190048	9.535250942870302	14.293910726385917	10.172739768118426
0.5700000000000001	4.326986347213345	10.002370638439315	13.328768183944257	8.397815780789838	5.990667171013297	8.046783874725442	16.83872750671312	3.9037672810573274	13.959261738146603	9.664173634703575	14.239373381491042	10.07875352183301
0.58	4.769526865641052	10.610474766678871	10.889189231151711	7.408831835356501	3.6134427421952044	9.074452807964732	18.863159168677097	5.093763626662388	14.001673939252527	7.484645765821217	12.283102365284188	10.585980593558501
0.59	5.03319091090464	10.957751461079178	11.393874453356126	9.498900317628017	5.585562229707028	10.527836581944443	19.781892586568322	3.72526536110151	13.858085769935201	6.9995440494452055	9.007663927508354	10.413618895306106
0.6	1.0819627860689311	10.988435922177437	10.19370775099093	7.26642928910902	6.610755511863387	9.019422939324121	19.0091429248757	5.6831949129978465	15.234546575565576	7.871453113557647	12.590234715479982	12.371282114695692
0.61	2.528254854336282	9.19634914739979	9.871289966089789	8.758594099293719	7.411895807052858	7.961402314635795	19.041813835936118	9.102983270884915	14.386173060618516	6.69143425297077	14.154169529232815	10.402139110188516
0.62	1.499308543980514	8.109260063105454	8.747543657038937	7.620608343371388	7.696189303900137	9.761557626950182	18.35287154386839	11.046801606819212	13.219938459664759	7.297456617280022	14.866965062445765	8.422091852288657
0.63	3.149712361237037	9.827745027839654	10.837033823894858	8.648716328107048	7.049951806144904	10.252117628454721	18.52127215282243	5.882560056314923	12.424731219467466	6.537032012889629	15.443425607887525	7.658021027218843
0.64	1.8935604206996317	9.59965772399896	10.75405883990886	8.542992438212362	7.23387526389209	9.942363449262572	17.39708515212342	5.705103684023397	14.684687324060981	7.803478657656372	16.129178529596082	8.748288841681045
0.65	2.5582048089730622	10.334464777919727	11.10680330242392	10.675385471481114	7.487634737963864	11.492786965364148	17.5046008386472	6.418179306131657	15.352194107116757	9.776563701311373	14.977657645358931	7.940457466268507
0.66	3.815124289295591	11.862703871108286	10.813146906863189	10.995261690067661	7.748978603358404	12.766994019138215	18.768048409030424	6.6167150675022	15.202276364875912	11.115819517383088	14.59399493533025	7.518762949342119
0.67	2.6896986178689626	10.127080441264754	11.563251976540808	9.120545557250141	8.654086671997105	13.495628994435686	17.235610637801166	4.172426003255833	13.490979640172458	11.019247339429931	13.907619950786989	8.304200396257633
0.68	2.95256023285695	9.17424771143998	12.11403483420953	6.989693539425215	7.951043018695214	11.001507548204344	18.340600933280875	4.138876129226557	12.58077033026325	11.655818896998955	12.919179668117533	8.223924112331753
0.6900000000000001	3.5043248522834523	10.436120477819077	11.594180889460493	7.372370829103578	4.624234542982403	11.025566886368829	19.85444264686505	3.836307390698924	12.64527555334393	7.880673824793145	15.55245564311225	10.056727338901437
0.7000000000000001	2.796271646436952	10.920968444408192	12.990376010540686	8.140925469642289	5.304585519185502	10.692806410912915	16.759718461716382	3.42229839436913	12.024820361756607	9.315265990734074	15.049953190731214	7.650401264309626
0.71	5.654432802585575	10.943770961886985	11.869174157885684	8.280746416603392	5.292134383465394	11.629975152865068	18.06577994383983	3.360239879502065	12.512817071685253	9.202684777094628	13.335647932460668	9.335437740743455
0.72	5.244407804789033	11.508555774143698	12.13017408395422	9.841113103178852	8.324082241179662	10.55608217478975	18.562438817321006	3.5661998791156533	14.261115930469199	10.482979347973975	14.994164936283912	7.244241530363181
0.73	3.935311815305891	12.912721908483205	12.16427347237695	6.964286483217384	6.2016672855323405	10.21707384493163	17.909392238690526	3.677421767121878	15.161990411673903	10.43930884989723	14.43039419796512	6.58325357820798
0.74	2.7646069282374066	13.142081727460242	12.932789074560024	6.468609283181474	7.129942172926909	11.794945578681416	18.59879056980145	4.300029561486092	16.816094007976254	10.066898805123623	15.118471253686561	7.786803908381118
0.75	3.899574278809044	12.016615856147432	13.945838646754892	6.504510453156475	8.626251748052011	9.046613620467703	22.63004856056109	4.0134650558431915	18.768532172249117	13.208920457608862	19.06786210105019	9.1072345992573
0.76	4.045950557289936	9.215200105757239	14.240193337832146	5.959193521541261	10.151880157664351	6.977022202219843	21.471609893174172	2.8566330492201306	17.108379874484253	13.254604245904806	17.1072635000717	10.05420720605423
0.77	3.445113569009489	8.65906492441031	14.770982649322699	4.715690071695894	10.59658836071833	6.063185470764972	19.559763686963592	1.9451630156892232	18.720990404795863	13.05251501405145	15.119502058308562	10.779149509667175
0.78	5.212873365239658	7.64423638271154	12.259416173927116	4.166998059764518	9.648992578088215	6.802231819549182	18.11581765250733	3.505257669597877	18.70894089322498	13.934848129302226	14.786117366386193	8.920519377411846
0.79	4.390870574047669	8.51126099824773	10.49808290368405	3.070048867686451	10.209786289166967	8.600628938019083	18.60427869017577	4.61459706078362	20.00959258769686	12.324176571895153	15.872122296664157	7.438988154331238
0.8	3.599070402653628	7.023741803815553	8.777475685781255	4.306900086272408	7.149759672932406	7.1116090915458745	16.584657225404303	3.166260028053765	19.555806686083773	12.563013331000079	14.302052083802002	9.051400669787169
0.81	3.5986715388568906	8.550511224455281	10.775747462790228	4.057325130804407	9.886528504670355	8.161976983129827	16.87739979158727	3.003125194172239	19.18922183229371	14.151377087935918	15.169781364760368	10.247839896660288
0.8200000000000001	4.595516018799254	8.632173231810754	7.948644410513432	3.6526704163145105	11.245074928134368	6.917695042640379	17.795885701089766	1.58545907834884	20.75526117375249	12.828925519197174	15.580897938602075	12.053764751947911
0.8300000000000001	4.390953792130051	9.080592275856965	8.15810153101775	3.365427168246046	10.646238006466547	8.513202351780564	18.676199611322428	3.1704266237112457	21.782277441253374	12.302520722034501	15.13251295608992	9.77425844263803
0.84	3.8935185111086152	8.658431784575361	8.940955963341224	4.519035589030763	9.100967772587321	9.138584699618184	15.95332740858814	2.1926718171366106	21.900754245376586	15.408668682361114	12.680662110396124	12.940396193215376
0.85	5.106265429409906	8.538299036951006	10.855015967947427	6.329376114645929	10.627785517597374	11.883474394988923	15.276638779866149	2.396291109319526	20.43110396230325	13.32480787172594	14.3602055937824	15.80834470390788
0.86	3.2270629663262405	8.803132011191236	13.562813324273945	7.676061187815292	10.848925305890473	9.554081666188472	17.688304314984325	3.2207895137840357	19.276654253553808	12.497422915635436	15.809199859171487	17.034386639954608
0.87	3.5088569565302503	8.385559202998717	12.54252583344925	6.716259443717453	12.951920466534336	8.231941426853178	17.57626212961434	3.2763541994496856	20.992111677479286	10.260595483527565	18.323867556368313	17.157360066839296
0.88	5.232008283563692	6.88088052857895	9.943610698967024	5.111848785616403	13.100920276325976	8.79284876440169	15.760565018041547	1.056271646615729	22.598670819127527	11.919042150023293	18.255237981706518	17.265871727766516
0.89	7.382380139783043	7.157620666246856	8.644014568236809	6.7314927761173085	13.684533479918489	7.730244649199567	18.536980906799126	4.005714753338496	21.235575674808885	14.447960956542369	16.70480896909805	15.678285819046373
0.9	4.650641873839486	8.608529255159283	10.111915132878092	6.043977016195469	13.123317144912347	9.622323301611077	18.8197765015888	3.055419888208179	22.326684987711023	14.27413654907414	15.605250516534744	15.898802146084918
0.91	4.785758323699334	9.20777409021768	8.839472103307836	3.787381197685823	11.452431645162942	11.66907451830825	20.899627497451448	2.8392584443363584	20.645569838266084	13.522960708542854	17.052185411675552	14.694730834801344
0.92	3.648055783224166	6.3027235932290155	9.539566653858666	2.2501708014979904	14.051183055970268	11.162341831681113	21.130092366913015	2.5472151899150743	19.250838130183034	11.071035738632906	20.197634563229048	13.433852811675834
0.93	5.6647920584043145	7.298260342284174	10.854748992306769	1.6425149055740011	12.13536991689739	13.503796198872774	20.771708819106095	1.5213674079195054	15.707967918258175	9.532500184826805	21.036791699882116	13.944122665689784
0.9400000000000001	6.742149307318584	6.601080970143237	9.11959601781909	2.911225092765993	12.88452135916086	12.408397621561498	20.906100784257067	1.5222700852907944	15.866047338717895	10.756357327939114	20.086127811829698	12.035730655283775
0.9500000000000001	5.421309364250215	9.40481482976844	10.877086472919816	4.995784871215065	11.14388268642041	12.164790644427798	17.675129544709254	1.6890015744681774	15.687296266623154	11.164320153070076	19.339010527246806	10.568966419461189
0.96	4.870199587957363	7.212909014458755	10.435745803488292	2.997600765772589	9.900811634878425	9.794033251976247	18.75175132324263	1.3336761785194187	14.804364203217617	13.404227310411558	20.66636389407155	9.713886575415216
0.97	5.230668131515611	5.9813774768488726	13.676620884196767	2.9713219337807506	9.26072448228129	9.788124792568693	18.694805987763054	0.9354366588109061	18.096962437210397	12.304673887453019	23.265288131094238	9.53256162719603
0.98	2.8139852845050837	8.890405770382966	17.429421732100348	2.6132640620594887	10.684216266819805	9.633990977693976	20.246844592273217	0.8928034881017077	19.491774130264186	13.468769664254598	23.44024542141266	10.528749448255887
0.99	2.6417244794805934	9.586367140995225	17.58885681794333	4.431106425763688	11.277679996054843	11.633063645214957	21.19483239254083	2.079397987715381	19.292074853729407	12.05930172139405	18.453030578594753	9.096120404087037
1.0	5.991181265474632	9.946508892881706	14.872890133364674	4.511630791151941	11.247327341694408	11.20931917300106	18.449292920799166	2.8039584579178047	20.281299109993228	9.915059305504336	19.93968893622482	9.652066060737107
1.01	4.873157217626803	11.742232704279893	11.823450822651463	4.0148747971036665	9.746990462937298	11.337658284054562	16.726275610156005	3.0433842207479938	21.330051393471006	10.975865889354182	18.497832458702753	8.86912041133166
1.02	3.847989617842738	10.732910507191042	9.296836871487617	3.3359340081008098	8.812740111730559	12.71043457175619	17.787415189313418	1.9245875181428804	18.76044320215375	10.88395993338011	19.5207213739822	8.036419133164848
1.03	4.7310164031019255	8.173997923168567	6.61895163461492	1.804884720073145	9.032120136719186	13.40172748281328	16.34833983482866	1.0394377695229777	20.26293330960561	11.413096938097697	17.919748090204806	6.728707687957026
1.04	4.726640774600406	4.6905686681603145	7.537955557549335	0.7011281796670656	9.831332198117043	14.62057842378264	17.749304810853133	3.557886247584991	22.3674617014975	12.74528226891456	19.56096473212619	7.316086222099444
1.05	4.34602623698905	8.00741437110666	7.041206756015934	1.9591827951325784	8.392517679874906	15.244327896462186	18.63997311016255	5.090091503624906	20.879007880797833	11.037277864396792	20.25698979817654	8.47698495108006
1.06	3.2502978631567174	7.909252558135618	5.531259481653319	1.9973358300764414	7.606268242162424	16.27096344784431	23.63493667890784	5.337007090800548	20.212119336768616	12.253902828760106	22.679259349033696	8.625154697339115
1.07	2.034894104437916	7.955394696359354	9.183457613690576	2.7210298141081415	7.217261130152796	19.055155753998175	22.81680727657014	5.229818794659435	18.467954216288742	13.21316820167069	19.827752579576828	10.378399802364962
1.08	3.2433019883017953	8.57360822857286	7.629362843341178	2.541163871176865	7.889547477354946	16.60972761227926	23.229271647115215	5.972848460365187	13.71472030032899	12.225545558214638	18.396478462102536	9.805215591334717
1.09	5.0190858046774895	9.235963361000561	8.039655321643611	3.5649908619438544	8.448666557575566	15.402965402943254	24.22555565904607	4.085836593376138	14.936703454237797	11.236557591021327	21.792524193739037	8.839696635323964
1.1	4.057796207061546	9.398638986354246	8.070559730857294	4.040160699545851	8.521730281021368	16.06974993664488	24.47772305893174	3.843241945575589	18.22453311886031	10.138893926057788	21.6829402068745	11.79607363661052
1.11	2.10503426410419	12.188437373801275	9.431351618677686	1.2150376383241508	10.164113737615533	14.937211384484948	26.05263428323741	6.1963342843934806	17.172198089717842	9.984305420702155	23.962018728070014	12.706218799391875
1.12	2.995471199202403	12.73482065621797	11.164651210129794	3.624051864602699	11.475440724701023	15.872296963296046	27.43944272508799	2.990630941808295	16.032715594483548	12.150752165510445	25.324510813373287	11.009594603286192
1.1300000000000001	2.305449268699246	13.272996072758996	11.024266857239246	3.516067750548772	13.020451414245594	16.35587393423248	28.385673819469467	2.9819240099837803	15.322817506716673	9.26667070322484	23.708136468512038	8.923879987058841
1.1400000000000001	3.139386896269465	11.908694430624875	10.93322879916972	3.8302601733200037	13.044423249562833	16.594334361596186	29.383372431238254	3.401371723180499	14.30778007951964	11.723516963362822	24.32762083093913	7.901081378010808
1.1500000000000001	2.820206564459668	13.150454989162549	10.894930622359688	2.576311241840559	14.315046666897198	16.762571745848955	28.198309565365204	4.0899441190025865	11.693022087368455	12.19058227380384	25.210151025141936	12.095974292819152
1.16	1.8266028283477629	12.717046878218323	10.669488424238835	3.332081638816659	13.552467310652268	18.029106891022963	26.244488565616003	2.5329997881908635	14.880442485994548	11.072634776378214	22.59587110896312	12.829315263728802
1.17	2.1435838173979076	11.145583220840585	13.08498412268553	4.261361821924938	10.912968116877629	18.50556330153966	26.143290857321997	2.873985331325968	16.40389241597398	9.547503870267823	22.7045029680762	10.094408173618241
1.18	0.7754966085904994	11.597023612749979	12.498666484430874	2.95902172573073	8.256129357575881	17.71594310651741	23.69529002346139	3.5381090948829783	16.36473723970572	12.224634786821232	23.752462371084185	10.578443963451132
1.19	1.8204162228677598	14.000472441158754	9.38265679099641	5.541146440018905	12.056994863319922	16.395855404811094	24.49102581386804	3.747830635428192	16.54671387747853	12.242074202953336	22.988603469822625	12.92090646832319
1.2	1.0981963480145247	12.490714731934698	9.300661884788878	5.764606207373792	12.142883066114303	19.27847806729697	23.46769117526765	4.831542160952285	15.196676532223723	13.05118808115252	21.219749022663763	13.518029632126916
1.21	2.6074881103827696	13.515312134924343	9.838814460948136	5.307467876101089	11.862171255703133	16.694732927368882	24.107984650709334	2.452333362484307	14.602629309850858	12.067045578642139	21.098578761924756	12.130594387870579
1.22	0.3479494191777393	13.247055835727526	9.431640657566883	4.022227807820303	11.427557521486065	18.151587184798405	21.882539742820327	4.557241409824037	15.118460038229166	12.437465156006365	22.551726285981957	13.294888111991712
1.23	2.017959797931378	12.360099497747667	11.186576493240137	1.9806758224914296	10.703714078223795	16.502284982761758	23.1000397098335	6.10015376027937	15.944162179947108	11.18945616037211	19.91930714881669	12.568467184013468
1.24	0.8780066752402337	11.646157258312277	10.143744799129372	4.2495501970746545	12.981854180835224	19.022602854861784	25.77362721815219	6.081689082841127	12.07440275456644	10.511155712126914	22.554279841791317	14.08473483671393
1.25	2.0085581238690553	13.37353631746754	9.96243299721841	3.855010104673268	12.753618620877885	20.68052713340972	27.56172039280441	5.849230215699623	14.154199697810613	11.11482137983183	24.301682963265336	13.808903321295157
1.26	2.8377288443386988	11.72310025579153	8.170941033954476	3.1569205114257746	10.118601239237144	21.130185878890465	28.90233478894897	4.692138141897666	14.146587751546516	12.070798338958403	24.35249671724338	14.078861254617017
1.27	2.6339543255026907	10.238892293908531	8.822679563642474	3.198635474573087	11.140658878882599	21.108033327655516	29.58610743160721	4.63828071892646	14.171233828156089	12.309122896632909	22.972442154427085	13.923000190769484
1.28	4.111564459981288	9.101828462961798	7.31053161234631	2.0009255910624186	11.137500650398609	19.453022592397616	28.463802306885924	4.610466586608468	15.28716568497351	12.84607811308656	23.445574723601002	11.874770687160352
1.29	5.307851605529059	10.532414543505418	7.333245171208303	2.606647751701493	11.771079668744502	19.055468386489608	29.925728298471125	0.47736414822606943	15.956659007131062	10.352798313854917	22.95874193780417	13.618271128641261
1.3	5.7273323529528986	10.944789871475317	8.872996752008243	4.182831750465122	10.640100813642597	22.161787162429434	31.529215526096834	1.6161313892622473	15.312807733007391	11.907892529663233	23.697084647619985	11.699227745767532
1.31	5.679048471744205	10.769828025725399	9.728421058728994	1.729765467414271	8.596035448362436	20.68331983571112	30.047359900100414	1.2272330511541873	15.939132627940237	12.895876368327365	22.71425629228064	14.025702497867522
1.32	4.093354571248628	9.102261246810171	10.078694793262116	2.165266305145382	6.693458005543969	21.08440782661107	32.392619056766385	1.3098209100340057	14.244098984427332	10.264176249593213	24.127770794209656	13.711998408906409
1.33	7.265503198906	9.21963005524496	11.703270540144416	2.819875227224853	7.854924161812373	20.52689009679816	30.699417263199496	1.6765353851106348	13.87414172139725	10.252713252176854	22.70001204776306	13.50047859420664
1.34	7.17847706604506	8.187081097769205	11.16661302007642	3.1369352886032464	10.1589370285793	21.277915712923576	29.739600817009435	2.2243566889114756	16.88465804363704	10.51505352701239	20.419153002291893	13.553860503243335
1.35	6.263360131051989	8.06775150581861	9.559207538502763	1.6219261323807894	9.477951714249542	20.62317857325857	28.234048378674743	1.867487763965791	16.9475534050871	10.89366066601242	16.627844718921004	13.418971081503956
1.36	4.988231324411372	8.2378273046204	11.32044406955231	2.4989126376051853	6.518128839449632	18.913528214153285	26.449565646825473	3.7861071733774345	15.993698551859985	13.531098868024664	16.11041254525835	11.527833610085526
1.37	6.133386421518557	8.860860175665048	11.18020441160946	2.453902949390092	6.878491105770228	18.758131705679247	27.951611693392096	2.9575306255584803	13.775250526709128	8.38073966535393	15.999194912372177	13.273613814941774
1.3800000000000001	6.58254533652259	6.736958709853437	10.64245549631283	7.419237802096622	5.987006281931105	17.476724601421232	29.242466844543646	2.8573666377975493	15.777244923231697	11.691021693752537	15.5019925437323	13.806386386672653
1.3900000000000001	7.482502567590525	6.623306615732851	12.050516687114415	8.14251127569494	9.80409411288994	19.60350261072436	29.169332923607925	1.4865581123012304	14.777518636941368	14.320206371774487	16.600881211146298	15.676259545604553
1.4000000000000001	10.474204046118366	8.085182549681946	12.654509988700571	8.441817634413768	8.662462192031684	21.06107638537462	29.752415092388258	1.9289002859639777	17.250784315936386	14.168546086433643	17.501428791222633	14.917340162576362
1.41	9.330240964915571	6.793746956851957	10.291079502278444	7.113020040430657	10.831870845171961	21.00698966585613	29.820311488888485	4.5121065456233005	19.79668117116807	12.536711584927618	19.216216948684153	15.294701723285975
1.42	9.188308425791309	5.743479608484616	10.287419189749412	5.668761755566759	9.825279164577344	20.952271328184835	28.89210342746741	4.483119188321388	18.744844825280694	15.676870785852234	21.495983213522887	16.313915158020173
1.43	9.614029241149495	6.0454417641126215	7.51171664011396	6.881651418553014	8.720573077103225	20.723667397428443	29.030918445611874	2.85648557800015	16.332088720174976	16.18731378929265	20.343271953253023	17.04804043669144
1.44	9.722063853350623	4.443551144247267	9.342177136336424	5.905923282800815	9.473991030930318	21.598083343030368	27.18234226743982	3.2124111613448436	15.84822141485355	16.344362236365395	22.095175438636886	19.411824000772146
1.45	9.959354784364576	5.798799957762184	11.193071039423613	9.071262546639609	11.181479952850243	18.60604205962877	25.50903854855613	2.337743268180566	16.641029931595863	16.846172256036933	22.942650156465685	20.08820105047521
1.46	6.4699990896219655	3.4460829635521573	12.86454166225247	7.08412510498677	10.939635609485693	17.328427714750717	26.288572430119515	6.518828987551341	17.86990296039835	18.454695192293567	21.862783705376494	18.712002547845426
1.47	6.1634886276316445	5.64517780871548	13.475662076661711	7.060948741027997	11.128107796949891	15.000481628443865	26.90512981373366	4.773742035560247	16.853538909004033	16.106790270012525	22.076952995322138	18.094451212718567
1.48	6.652448261971511	4.443863848257829	14.043203303395558	6.984682927393725	11.01555546311692	16.062016250519555	28.352416723919603	5.735999022055561	17.29183635718725	15.826282055697954	21.92664126460581	17.310247928459574
1.49	5.114183220927403	1.838768043639599	12.789286671784575	5.738945951867699	12.529222871773076	16.878142193230815	26.62420761178305	6.32307425404716	18.164516800970237	12.919416913622468	22.02919972691306	15.84930079290765
1.5	5.681903587490921	3.641893585515453	12.047689724271459	6.466477686764026	14.908434645105668	15.903567819638994	26.639530478123554	5.005695178792884	17.700743261296473	14.746356362567756	22.997077289448185	16.0380097907291
1.51	5.103488750736287	5.7176288921299285	12.152608418653575	6.543984218537618	15.789307552334177	19.456867288935413	25.28350899682378	4.1228811518041155	16.14207737240495	16.055154757633847	19.180830369151977	17.523705685591914
1.52	6.699093027838956	4.742895946980516	11.510020552735515	6.330976301445387	14.776474667019524	17.36546269497425	25.667843137466416	3.8808066894963695	17.071534257215927	17.325317201259697	20.22135369821209	16.583158580612942
1.53	5.784286972454224	3.8287686771433305	8.214039091504526	7.175067795769207	13.046091829936833	17.024370059708815	25.189743173779284	3.8759655424993666	16.954397621712896	19.35087583981953	19.114332388719035	16.59786952879732
1.54	6.9052791405901	3.2321413416619778	8.785457364657299	6.487577533289576	14.804458778790828	17.046131468106704	26.098466752581857	4.8798509540810215	16.642813926415233	18.515024986136293	20.50227977241576	18.219984967820686
1.55	8.13653528174989	5.161136633715139	9.473193645970676	5.264437420001689	13.388556477628782	17.533480482449587	27.262511939681577	5.610617565307212	18.445491855353325	18.44283154677235	20.42511274501078	17.969574333909915
1.56	7.993915366567604	3.058653901572357	8.584970691082889	2.093494136572778	13.325991718462156	18.755737040420897	26.47505436334183	4.747056769399214	17.450791018971117	19.609461214969542	19.906183171506367	18.288137863743078
1.57	5.094817451406047	5.550408674956343	8.79786701399075	1.862811552689681	12.64472349062775	18.728852567044132	26.84998187945332	4.87609034647497	15.947309662381652	19.62694007738401	19.137836589962582	18.012239071183476
1.58	7.079353062171343	2.548463509512769	11.912395017778868	4.154584824656591	13.077742465084429	20.71396611511568	28.062909239722373	2.3480585661577686	15.935744320627832	18.19679075228537	17.19065959941282	15.535903467533776
1.59	7.287905739208473	4.296960457907511	11.336501042897062	4.1720116460601835	13.479678956805095	20.249290562225063	27.718896488675654	3.6727675537504396	15.157630531254677	17.73716356530059	19.488813118210302	16.594827152971213
1.6	8.484409424046365	5.543346166631743	12.128037180440762	8.233174558020249	12.943265963938984	20.345173132701532	28.442502540560657	4.674356633782843	13.307753732328349	19.036683954003358	20.304661086204753	15.200789208883833
1.61	5.570628037715745	5.25799647112948	11.308325039226608	6.2143694064897455	11.31813377777498	19.71570384789319	27.489197211973938	5.846347168331256	17.25321646322412	19.658664771903574	22.272439943768003	14.871260384079998
1.62	4.634947634726891	6.7272488422130365	11.363782620543272	5.977301283302039	12.516847732981272	21.238971561054434	28.06695605373904	8.96617138171329	17.175711629974803	19.145819387266368	21.90783798575258	18.05294748082389
1.6300000000000001	5.41318625055986	6.912809622045332	13.368858631161942	5.913279684143682	15.451533286467273	19.480337400510784	27.323670333207822	10.157831092609047	16.33042059829904	19.520025024722397	23.114090553550728	17.101934980098896
1.6400000000000001	4.844417719183398	5.411301507269639	11.944144336885435	4.084219850719511	15.07460912644862	19.684867874963057	25.267008589647954	10.30536008111284	16.98286973105314	20.090003197995777	20.841623225346872	17.89054342466973
1.6500000000000001	5.928623036298387	3.7833392652837725	11.04290677707712	4.122469511210773	14.816921432144387	19.65087230421002	25.24518001515599	10.073512863537108	16.803973081637206	19.67682736495568	22.054208024216532	18.541592901066128
1.6600000000000001	6.441739985898774	5.307958348862973	12.843047511104583	5.726301420708387	14.27261010427682	19.780444466359608	24.778416005926005	10.65877947648458	17.72369508115635	18.28579670545935	20.06289987684255	17.790221258006586
1.67	8.193713962484052	4.401771357525905	10.819348628512149	7.099404338238436	15.993685511896276	16.819116716540297	24.54628398047088	7.695871681727814	14.248562248793933	19.94876345687104	20.296300376860877	18.28507707170144
1.68	6.078624000575269	6.324076009771054	9.245274492653849	7.6654928762056125	13.081067310441515	18.913935012475978	25.16331329014243	4.375111371057545	13.842002531535302	17.279243008448983	18.77036463328283	17.1981704114815
1.69	5.052025641431236	7.886327549076644	10.619878754193735	3.5196798647466516	13.164624223467337	20.260872246864025	24.552921744275867	3.866840610972103	15.452986148580562	17.846491555722437	17.012014633286363	17.62896522768895
1.7	5.292348950230062	8.314617935603488	11.423308668129168	3.563673868826009	13.736692354624061	21.83449069969843	22.118274326237323	5.005288770753686	15.58755745312917	20.09493454014437	15.91683278760964	19.35978327720439
1.71	5.496414472466998	8.9966373702039	12.048957195112022	5.023923595304225	13.763088655749549	22.075504390188527	24.530962032555994	6.320144527282419	15.434149959371949	17.478297178293822	18.58336165226925	17.561997808830398
1.72	4.752434677441363	8.721452100947014	10.823712637508299	5.330325267074199	13.61303465612589	21.549131453491498	25.633122165881275	5.447285704096678	16.68892975724674	17.91960233498585	19.75180416120431	18.348404308815468
1.73	6.029785297099092	7.421526863350748	8.704140127571517	7.511209449318457	11.26643579195747	21.76561232596632	26.72903922261521	4.5407368565077	17.146489748881397	17.69980634564012	21.20709898773307	19.01945233083245
1.74	5.3353597737380944	9.681428087716627	5.351549148558944	6.344600609049225	12.881264143908119	23.901046811318373	27.05143089840453	4.405756726061318	15.812250430586705	17.465385014446746	21.99432582984469	21.921174483797426
1.75	4.950176498130725	7.975756074599029	7.862438123205276	4.972786837765178	12.912148633690222	22.145936943307873	27.577874520339147	7.176053080300874	18.219111813855122	16.51688993893249	21.749944722651897	22.527088752104333
1.76	3.0684691307461054	8.47071983307289	8.359966032210458	4.711336028889259	16.605600169103166	22.163133371072806	26.704918436354347	7.221463786326202	17.01318259118739	15.720925733713813	20.915490465272676	20.155071216954113
1.77	5.244920684592857	9.00744939433535	9.638886912624157	5.173957208829535	15.572794433535416	20.66571314406854	25.65783269566717	7.461134264705221	16.34599136709475	13.508972676762175	22.956233109533915	20.558183100059157
1.78	3.764651464344241	9.448509982591178	8.518729302856334	5.591962887184272	15.485424135383294	18.686921107970058	25.07895467743163	6.773831172435346	14.279864574317362	12.44749851303545	25.676222979231518	20.5262349565025
1.79	4.081537175395124	9.461225857667559	7.626869467657166	4.216177320715498	14.176257407220849	17.06102088927482	26.363264504825825	6.163197712651965	16.1817699524085	14.310452890738476	26.280466916683903	18.44889229255831
1.8	2.643579742733013	9.558918787039069	6.19715160246477	5.200251034955818	15.52005767054151	16.660636592527283	28.12254473405291	4.998115181159085	17.52053959869223	15.571961321493413	25.58577286392352	20.82789273550664
1.81	3.2736585407524754	9.173459384343746	5.691138135555085	4.237283962802582	15.860717664650114	18.57828185110014	23.050957177400512	6.280488583281695	17.9904578863137	17.75090252899292	25.32944056756595	20.26148099337039
1.82	3.6748603505248862	9.020067297181413	6.158306654967761	3.439016884911053	14.83334437349461	18.09696337470889	22.746920036146065	5.7662631673210285	16.04423036068458	19.533953064634453	27.397151209249927	22.92195843921914
1.83	3.6134501434040547	9.17426190249002	5.778018720965874	3.689405885422525	16.398719778719016	17.55933514457606	23.511972047846	7.782740441629277	16.50562473347289	18.660540220021296	27.111226993938423	22.761987687030903
1.84	2.6547779131926803	7.554569806275592	7.101896650242972	2.4358546583690157	13.428402387260645	18.855921838176307	22.254777669366263	6.951520440089956	14.073712464354484	17.81525089173286	25.926639547902607	23.825870168938867
1.85	2.9318325548330697	7.5277108593767705	7.352688450106082	0.1190742417433958	14.15921163319945	18.554684100543277	21.788676034958726	6.522909519427641	15.574177978473791	19.68484900640344	24.549687643015524	24.3104201997299
1.86	5.324573282524161	9.228431495044035	7.798364478712196	3.864375398743077	14.184514621394383	19.906115671372525	23.272385141376308	8.882070718405469	14.883365238048196	20.57328740746699	27.40394733443158	21.991748597714423
1.87	6.481211377809605	8.163610502037587	5.414342110351819	4.586922534224606	14.066487135360157	22.038733033486213	22.547010316056507	8.52780190620236	16.595102981114334	21.067386491482118	27.275367197314747	22.412137699541766
1.8800000000000001	6.759635423512737	8.47965504277038	5.743451772703289	4.850845109044467	14.24394725325142	19.361097142917416	22.6138338796513	7.908711157747936	16.002290849842474	20.182655686990344	29.892564623821347	18.869898976447267
1.8900000000000001	6.146876614149714	9.660041892740766	4.550636411223691	6.184505384658582	13.827472896645578	19.08954478263323	23.16142238547182	8.482665031905597	15.72281126475711	18.266019585048248	29.992952895055907	18.512935119597326
1.9000000000000001	8.129098535714244	8.729749109232884	6.330822687138963	4.092648833034262	14.768486800712624	21.03173332946954	22.137738385494465	8.822615527249077	15.030402507414834	18.45207688510496	30.12268761005566	17.138898949958175
1.9100000000000001	7.979193222520421	7.870309319696673	5.749549826800305	3.479535524143429	14.069708201187371	20.487416175667278	22.41658270453026	7.683638111699549	14.553073380786858	20.441494094898463	28.645586080027513	18.950711435815613
1.92	6.5136611405248885	6.389952138105558	6.289585077703876	3.8284817951471535	15.017904963258582	19.26641462729606	22.621682397315706	8.913182810487141	14.633827037915708	19.007435801856353	26.75657229984163	18.564096760131143
1.93	6.380756902250137	6.54842283019253	8.60735388609872	5.889369740068298	16.187968612399242	18.55869563374556	24.141376683156615	7.959626718056518	13.70016818951265	19.439201080483514	29.293754915119077	18.699402013334513
1.94	7.033034090165909	4.043798443830479	8.555084683372876	8.942301192464484	14.554031091878972	19.391188767232894	22.804638131191474	6.9933807714354925	16.524635889505216	18.734485248221763	28.763234085537533	17.826963664938887
1.95	5.895832445614052	4.33739724108211	10.35400244028038	6.695568045979672	14.413722362425002	18.66783431554204	24.63311899976592	8.815139512701226	16.574003545853866	20.24019059749354	26.557162552356274	19.80954805879911
1.96	7.866876910063022	6.260639926789384	9.300658564000521	8.229561840119702	17.53055603092264	18.34666405001996	22.50841404343149	10.5047710113475	15.136554897883471	20.829001331475027	28.628312016822242	16.770912074156993
1.97	8.555450853153744	6.052445033124289	9.28348088126903	6.202050845957583	16.409458338234	19.779251428633348	22.982639414931267	9.604340611662245	16.515280301304557	20.127272630743068	27.685328216665418	16.785726319651754
1.98	8.772736390699917	1.6490503824338276	9.302626393940209	5.6502525775655945	17.518996231826257	19.114607436048114	24.61854828024334	8.527872630476447	18.32379504639633	19.041761258516896	26.521099017667243	16.982188804238206
1.99	6.3775642625363895	2.9369861577397796	8.260168353674612	5.999297509098758	18.435056572141562	17.91681282101337	23.056426868982637	10.06327570674234	17.50052077575484	18.470544577800887	25.363556519557854	16.181993748838757
2.0	7.105036945538533	1.435339991828367	9.639723369864793	5.0210467724725785	18.99696150164692	17.070432390689636	22.673781488686444	11.363168665274223	18.67878819702174	17.727755605372813	26.35380378933496	17.82633031240868
2.0100000000000002	9.208721027962355	1.3946552088569826	6.909081671662838	5.8846742017848745	17.95550101977244	18.903273522621532	21.750609841600422	11.778854720973273	15.269194591399714	16.72448611631224	27.512118962671043	16.12878366292721
2.02	6.8194247985298535	2.8447286485240473	5.895168318404748	7.76038218860337	18.180112273902118	18.499588497212592	23.83251422101947	11.629134572221652	14.487823732946334	16.35394197618453	26.877140755730302	16.318705663514148
2.0300000000000002	8.553456470269182	4.628413535027553	5.127206602497514	6.442629276443502	16.672469674383304	20.353293350151972	23.494806259562363	11.885555343095302	15.059921108317948	18.541210503056718	27.828068757673037	17.99460480599504
2.04	9.485697413213408	5.406906421927452	7.603045346158935	6.849092699429992	15.982939613154171	21.111485394909362	24.124919002789824	10.719286239677322	15.962217957087496	18.007406418991266	27.741107149958722	18.29953192543805
2.05	7.209070615658786	5.362218017284482	9.471751877009522	6.599450622625492	16.185799189135835	19.21497367511989	21.140218960308204	12.255874701030312	16.443962450927717	19.718938196040803	26.463605600052112	18.311018221451775
2.06	9.119066967526399	4.421434677767059	8.814486665496842	4.7116397647687664	14.55610315691467	18.084273302733443	22.06983732025851	12.746823195894628	15.814668819083133	20.171653421535655	26.241018129587445	21.211117439384854
2.07	9.927877338725422	1.1138133338545297	6.697027371408353	6.956938494657173	14.103153236267813	18.983635717831717	22.750611241085725	10.591473630359785	15.233108657619065	20.21444698732866	25.20275580373572	21.631264460090794
2.08	9.450066073650328	2.370388713914294	7.41748418386561	8.580786884457092	14.89109557592631	16.707864477271038	21.782846652790283	11.745957329373242	15.030174536908522	19.561500210305233	26.519845016551255	22.924746077205857
2.09	10.234977875354113	2.489639749757562	8.608632488227032	8.319591296614023	15.465902253138808	17.411114152148397	21.616689449001253	11.06863683288806	16.91545492641415	20.889863659862154	28.82700164991591	22.850593641209066
2.1	12.087711394922012	6.847278199497967	10.026017449608803	9.033421836723317	14.710916563066608	15.460021956517272	21.690234902811675	10.79550285522392	14.96808936006539	20.225752417917143	28.854159213595036	20.695517345760194
2.11	12.678298641097111	7.8411187348551605	8.619755754009212	10.054035605986684	14.670686545757125	16.285764525483184	23.698107278645594	11.627490045027727	15.936940070904704	19.645266002444416	27.056707702968414	19.920422148094698
2.12	10.760067088966107	6.435860057929637	8.548382483430109	8.176973085985534	15.464708810739191	16.323904170865713	24.275745346633062	11.340871681991292	16.476404494596327	21.271158788637607	26.25885283400749	19.9835750555254
2.13	12.38726823738711	7.560012166429666	9.051335299172994	9.215142143173935	14.265412631004475	17.774811292671263	25.121620234353887	12.114308673703421	17.278219449434047	19.66060409007648	25.598850143901522	19.117422350338956
2.14	11.403579608010041	4.5140247363550605	9.01375257175744	9.642133303515864	15.721870286859891	18.92496590406642	23.639603493441268	11.768647365640852	16.414695937032867	20.217292666638567	26.414257163808653	17.992331545576633
2.15	9.078652831577113	5.438584949025507	7.094153967362399	11.72035145335191	16.85740119828063	20.485150035987914	23.67959044723035	11.57272064562304	17.735657842389	20.5383208523738	28.73814362736469	19.244712181186568
2.16	8.141784733614703	3.56813912337394	6.667347444568946	13.586480145035624	13.557169226702309	20.82623959949822	24.930663225625302	11.725599459639428	15.070957224461663	19.179522661316437	29.61432837240817	19.41859176580729
2.17	7.781677165386959	4.996114421458466	8.334578589234143	11.87001423136565	17.30210956035974	19.87743886714684	25.80706550151218	11.342529828720117	14.647665543136313	21.065497365095545	27.96148657919507	19.751299309983313
2.18	8.560563636930619	5.436626073757402	8.143835200561037	13.25140594299143	15.684264984364065	20.56771575220115	23.44759974936661	10.484126405411008	15.230317142814345	19.484061351052457	28.56116133102181	21.974160141482884
2.19	7.92828933794198	7.212029407590062	8.067554781452879	10.459904816202267	17.977050819862008	19.623896314334115	22.03368854579533	11.37851820822453	14.887262714870408	20.085410700504298	25.14766296007627	23.367114594567184
2.2	8.66498977067859	7.92277521287014	8.008758233156808	11.150554071329207	19.487341524230413	21.369288414577262	20.275258548208644	13.67464399338126	15.955812942420016	20.74828393750484	24.96317631612644	18.76720816652135
2.21	7.456078905100512	7.784948051336398	10.242703406147724	15.72256433669962	18.874788132370824	21.002786714710055	19.758399385080928	11.742698957540217	14.41713580735414	22.806623097422598	25.158278943148833	18.827151690015064
2.22	8.213064893592545	6.842490476528223	10.110319046314391	15.491894751556307	17.785960193590306	20.93861169078792	20.848548992416664	14.069389285477627	14.7830446224865	22.498782165447334	27.17839838920344	16.10737659555772
2.23	7.97186704503516	8.9506901573509	10.02037175488231	15.474919970251872	19.390230672516736	19.10313447963221	20.188360147837784	11.367105470671351	13.833087314328244	21.50660691778585	26.44817149485557	15.364557774713813
2.24	10.479457268113777	10.275056961395471	5.543778245068842	17.0501425035783	16.979305320884805	18.428730151196696	21.46931480884079	14.002747931977968	14.384744664396097	21.846842278693988	26.481325610865646	18.598665670720123
2.25	11.361395210973276	6.837256534187063	6.0409175767174395	15.159672454077324	18.686295110777962	18.324635612073447	21.567116407924523	14.688794014138649	13.497457130663763	20.330386089054176	28.023976491383873	16.042724404327423
2.2600000000000002	8.068848979418322	7.632448991922625	3.4887692985049124	13.936559486008724	16.019547577716498	19.21351794689002	20.433435222099728	14.697709573977772	13.74397225596843	19.420114719514068	25.422062708139087	15.606121656511062
2.27	7.886209703547329	8.467107084123342	7.234020634202084	13.456224701649031	18.218197368562652	19.800916546634937	20.420133287771982	14.588208498388141	13.481476462648157	21.741183605484768	23.930185658777386	17.178304233122926
2.2800000000000002	5.409443717490977	9.573029259651337	7.924131899405852	14.035805266512554	20.17634322025531	19.00130377496881	20.638584231764153	15.283554723858437	13.703600892683243	22.9346870677503	23.656671008231545	17.149467036824696
2.29	7.39314223324045	9.198675846868378	8.956118071318338	13.56971841800767	20.37008498197633	19.93552351120392	22.255913257026272	14.317862171505556	13.31832296037577	22.026537633306585	23.255809167854384	14.281132486488097
2.3000000000000003	4.119877620882692	7.8041679580325	8.04720225414858	12.986181005983935	18.980847710961935	19.541455998215405	23.013081961425122	12.819204075686864	14.105407650183121	20.058993681917315	24.06642263817209	16.23578960662777
2.31	6.497800835103315	9.549812190997258	6.892282473987905	14.75079707753777	18.445724679851345	20.898610623700616	22.14939507870244	14.327365448317552	14.26065965271405	19.536474035681564	24.47995652512484	14.908413135668626
2.32	7.212480869991037	7.494966499795215	7.014024576202239	15.704555693796111	19.79160491330809	19.791711322101158	23.26217585812891	15.898068926779775	15.632589369091145	19.960785595330087	23.037529466648067	17.278966938134687
2.33	8.621493195232897	6.893729163189101	6.247010066219822	16.626148881527385	20.29137969860705	22.364689322000594	24.109261470108073	14.809522035510781	14.939677285251921	19.3597523411623	24.122820212087976	14.821367360595001
2.34	5.469080308065174	6.330117492321445	5.9851200541608955	16.576041296563066	21.055644923448416	22.81158833015693	24.15443857696235	15.279833105303119	16.766528285814783	18.759909066033195	24.765734650005548	16.485644071297738
2.35	5.112433738912203	7.370167755806115	6.150286875493162	14.611423768691214	19.29255711463558	21.190564232070848	25.724713238538182	12.992876498124852	17.14646931999976	18.651804111402203	25.969569514630802	17.654130183486664
2.36	6.492310961637854	7.538176335194197	5.194525793350997	14.772451092102878	21.48897672765149	21.639665992378845	25.49928831230165	15.391813956886452	17.55452405406122	19.876394225456295	25.97073423948203	17.203182979853768
2.37	5.931188230350684	7.465494152710149	6.212460807133833	14.252355063540941	20.542749325245953	23.97517039389615	26.012604081723886	13.44702192407684	15.060070839169434	17.661769190725543	24.63326574997378	17.713873112584544
2.38	6.615490335033255	7.008758913259784	5.369109687435208	13.244515040607086	17.452845187656415	25.664976290486155	25.65871243298434	16.3284924251106	15.840958736102971	17.009244457619154	25.489975404837356	18.26600586364422
2.39	5.072888139845434	6.789276991658168	4.569720150615218	12.709929172016594	19.59287032421577	23.513387768971647	25.554557352426205	17.338095480532623	14.207576410022059	17.92300018321549	26.269238284608804	17.71159221208002
2.4	4.628120278739502	8.221233490152642	4.119615404627038	14.874903738007513	19.539332926236415	24.776846804405558	23.336841923213406	17.684771626519183	14.602973581467056	19.968937822552682	26.07702031087577	18.380546888429492
2.41	4.384977427493628	6.936983406074876	5.669482923455039	15.476606143601073	19.4889063160479	24.75540992691331	23.198658652042514	16.129539950690187	12.967001634052776	22.26437624414982	24.1175623622326	16.801777771674885
2.42	4.212561441172983	5.3150007338653955	5.419087895884059	14.36909051979764	17.08077299919092	25.81556798241105	23.166579159491867	13.937900251444537	14.195108478443839	21.31880615934939	25.65085782581151	16.739172966916
2.43	4.096148094778254	5.967853410260058	6.5860726725100065	16.607089489313353	18.948326061400586	25.814952394240297	24.43582548861652	13.6404824906727	12.846797315030143	20.88802239856215	23.822197513457127	17.960176717254736
2.44	2.440019435065949	6.339060956494557	6.660625848234186	14.60680909152529	18.244235713066356	24.98502200925732	23.76698490444605	13.038472168957036	13.581324793224091	19.320066405212028	22.08949156683983	18.941862526045853
2.45	5.695215073665305	6.282868589629395	5.40328136254707	12.957162867097162	17.821827583743893	23.169070537899458	26.442473707715717	14.204045324314698	15.184227497008433	20.244498629271554	22.592214240642654	21.11742747563883
2.46	4.679212846464509	6.139807121128889	3.6340158940909806	15.52701302112992	16.02685742544906	24.450572323208355	27.948496634170567	15.297746807379028	14.423935354433791	19.949151329591544	24.699123606795418	19.926122433662627
2.47	2.9724034691060526	6.16133746628702	2.3905914501282335	15.215072884576946	16.84214152148966	22.041964647103285	26.51353832403152	14.102247295642266	16.343464958310594	19.8353862622454	25.351495765970306	18.73581912183279
2.48	6.421430231970442	5.788553168295565	4.02870749519011	14.969552983409109	14.101826174149092	22.64252723142714	23.99422933954168	15.946850739165997	15.704165013598605	18.973491277278686	22.596243118688456	19.331199768457864
2.49	4.7028948887705395	3.007749101401134	4.913146131095683	13.174048614653126	16.644058250595464	20.95676647698666	24.422557390124705	15.413536767420542	16.938040018331424	19.234761859277906	24.191689674070815	17.6267826344783
2.5	5.010775731585111	3.572291160770109	7.623229518415126	12.769200275637724	16.94672878204982	20.2595031126611	26.339707473542322	15.950144157722038	15.495920816975515	16.980555585560516	24.13205775759417	16.882655591624605
2.5100000000000002	4.199248357814164	3.406591113662472	5.742738306246044	12.489560132828059	16.809983465159434	19.869566989604035	24.01734721782709	15.459326508701029	15.99197237690278	16.98515482618536	24.555325413006585	16.844812954664842
2.52	5.20608584499109	2.287307973698835	5.8582897549444235	10.266268474127308	18.220747363930723	19.98733777832601	25.12850033190217	16.361854632689997	16.568699905219297	18.8788745724738	26.80455584534647	15.710131949609762
2.5300000000000002	4.295527648189792	2.590558416337664	5.930170374953251	13.02429795558918	17.6224342892854	18.534720850840195	23.27817345378005	15.282734345851951	17.407404741728858	18.66105647224702	24.72738451557892	13.98192694693347
2.54	5.130548715332309	2.8637743794371255	5.4255036103962	13.840751499010729	16.606677583670187	16.127692699837556	22.591877816131817	17.499779190722823	17.39225466700935	18.799471796614284	23.49502684643674	16.523442939660967
2.5500000000000003	6.18288822154858	5.4582920110944455	6.622572767697122	11.368576609555621	16.893386996800167	17.401341815838393	21.083623222085347	17.726508521802923	16.47987583411947	17.33473731929614	23.14870269130092	16.140094921455127
2.56	3.58589584120753	5.82533779657383	6.424517875961854	12.245211576253881	17.345223920474425	16.93749422970987	19.575941098042627	15.997135293085341	15.283952676330374	17.615844539406282	19.933092213046375	16.517811660210675
2.57	4.62420060120622	5.909666147613656	6.663800137577046	11.683912682385795	15.388291004197757	18.25764670664021	20.652840399276837	15.075080608808674	14.986275681765191	17.28293672421333	20.94408179211109	19.96754041863599
2.58	3.1537101799629923	6.479003998303341	6.675133877543228	11.63352627818073	15.085593787690359	20.991795235300465	23.479884859456018	14.798300824981306	14.19001685719059	18.831153716271906	20.113108084087415	18.152682464617637
2.59	2.138077307497917	5.623690742947701	7.784763296373346	10.020607768842229	15.526811912523232	18.74404992612874	20.561071893999042	14.069199302729325	12.700611139619832	17.52254166289352	19.491106477639537	16.785347026857114
2.6	2.4247456513242254	6.862242619813577	7.012032560878037	11.74365327462131	17.809176286568235	21.70469238474596	21.996411526899628	13.638863984803208	12.452471524212548	18.463162306416645	17.928446457403883	17.60018673183813
2.61	4.589324465509243	8.554593547270724	7.842911927423631	15.113083886027042	17.693715948206766	18.977317352856744	23.660975165026766	12.24181171819364	12.220031662429186	19.475804311424618	20.96852806318897	17.310500780649335
2.62	4.4131407295978295	9.102833852985018	8.36860809342813	16.173078669550137	19.172768213539555	19.40589138270781	23.46579551210073	11.19205856865929	14.731393794956093	19.232482884337106	22.775335012472006	15.46503331318204
2.63	5.441638212317336	7.759290535066661	8.772742462503523	16.019877393929868	19.250540350523288	16.954782567242642	21.38199885121464	11.119569590658314	13.95499198872692	19.19828832401612	22.539971971764373	15.293321391040934
2.64	3.096117340560231	7.739701580837843	7.045601291723548	15.465898506865303	17.55759266928521	18.479005905499072	22.92777538538302	11.790453347410415	13.442456978342754	18.750895799368053	20.368219007833414	14.54746176967064
2.65	3.4422194519778855	8.763716032356735	8.068737196165925	15.673012581058973	18.327278587407555	19.792186666246426	23.21846239877138	12.259013398650165	12.155385262943947	16.8920412597068	22.53599560713031	15.96491857204765
2.66	3.983053501992048	7.8370181225652225	5.628760775477796	14.092265691573699	17.29507705021929	18.167219807364187	23.036090376184944	10.608821376282037	12.971289021246026	14.768692507623578	24.934823491902762	16.301023805392813
2.67	4.54911770468764	6.723660510996415	8.603648273111725	11.499685035766648	18.96306974736134	20.02627119709511	22.44275789872714	10.18189130372565	15.655957131875383	15.365959611207463	23.31727044713192	16.615678782475054
2.68	3.0511111865418354	7.393468455893432	8.406313636232506	12.259639967577492	20.44031404122135	22.467606627181308	23.570820007596847	10.683212253189259	16.163898904596564	17.03605821597562	23.109961465566613	17.31047777357847
2.69	3.9954494950078554	7.197356280707163	6.750556203299172	12.071666804317346	21.61224885372593	23.057361006611096	23.656380874043265	10.673779718545003	16.82508406846646	18.512029521700843	22.8204931072294	14.362199764115944
2.7	4.691433877573079	4.0209899061310255	9.398243186910713	10.03165766020076	20.917433874307605	20.141984044908355	23.51243455575714	13.582765470492799	16.055269471845595	15.882703224667686	22.12637537702371	16.53793861318861
2.71	2.959078948897974	7.106891246672838	7.749015281843606	12.18525279376686	19.341417041400586	21.8523886093223	23.587529349996444	10.537063581786652	14.309466371296807	16.411077501246254	22.561405997386096	17.038693661131724
2.72	4.634260260282757	7.004116711949897	7.189936647012656	12.276460155200626	18.743887483933523	21.534193469811417	20.4456090141088	11.116084437286423	15.980207661147444	15.04998585466988	22.48865325610494	18.314692610008354
2.73	5.906928458192426	8.378986015015863	5.483867868662346	13.89313172323089	19.68251987397838	17.492975657334366	20.111678993291562	11.15863054794689	17.104598177114717	17.608507638480894	22.120338750612557	16.6635737397498
2.74	6.392246549665337	10.573008804779482	6.624732739249478	12.97912689985118	17.906733152411945	18.997265736661046	18.557692561598454	11.715063849519767	15.023094045824314	16.214383174579815	18.704738221564213	20.031837513540903
2.75	6.489253020643906	9.862879254271519	5.1502043845388235	13.832627719987702	17.431288301068733	17.632997262690246	21.586631333437616	13.177391646988426	16.405451095415582	19.310510342752917	21.670903113378614	22.321810539122826
2.7600000000000002	4.851832819086383	7.491505154051137	6.741964362860019	13.503779057607503	19.405922549496236	20.107015990289867	22.101486358464033	14.046036259899218	15.279683179719061	19.048973440059395	21.351371792290745	22.548297936034114
2.77	4.0338873577748	5.048114101900018	6.870391481212237	12.502269566035865	19.020109669289276	20.85901459366128	22.064289613444863	14.355153204199945	16.201538405799454	17.313343212143867	21.57739632649955	20.04925752874497
2.7800000000000002	6.185025219110157	3.572764826078143	6.710163550085673	13.988735937915804	18.45414251639233	20.705958514338597	21.363529778710657	15.777830571220948	15.093118027763097	18.170239530250942	20.297235095080755	19.622591181292073
2.79	7.9413094501745904	5.948272341407388	9.015427421325588	10.335830979188419	19.34925114658338	20.27885838013279	20.828080679994606	15.229483946999466	14.23692047957205	17.179349846270036	22.159588996722334	19.59272399322293
2.8000000000000003	8.908754775362048	9.270064384194443	8.449907076550591	10.25958418062518	19.89666171164312	22.082742242000396	19.849701229477432	16.448678949149937	15.795625261700447	17.426790806845194	21.182469948712118	17.546720084512238
2.81	9.595497025273813	9.000161566550592	8.6172138221556	13.204028774886265	19.260206160490466	21.10698459057834	22.63837354709775	15.637670319435534	16.91719509293323	16.757756773762765	21.07576289056423	18.09269527375548
2.82	9.479125403509642	5.846595106172412	9.438049252502	12.687203088213904	18.317495622860115	19.33765823885155	23.521169991709474	13.819782744799424	14.161209158010298	17.40043750997099	20.583050707271518	17.165338152694478
2.83	8.09333616364039	6.513363974167294	8.192337767242403	12.16919768398744	19.740793926517522	19.27881291534507	24.544560449748968	13.76302084386204	15.650972323571356	20.26363999897193	21.85046044044269	18.252508766245835
2.84	7.700626132881449	7.1699386368282	6.307619498619765	11.633800768410326	18.955151150728163	15.867441030651047	23.184237087092963	16.60204061197894	13.66121218710843	18.727120935653346	24.185457658367916	15.414467846863609
2.85	8.169624780384186	6.896108018680362	6.166368941413995	10.828733380416937	18.740767248282893	17.356990502879405	22.674770831747455	16.844836259670608	16.740595737022556	18.612883225702042	23.90770449766371	16.053199551132515
2.86	8.951610853501064	8.611958823818545	4.963361176510986	10.113338009786988	17.340883999497123	18.537130003991578	23.827713962175054	17.367559246147323	15.546897121018558	19.556063752553563	26.29894550413918	16.58603619102925
2.87	6.35697440807758	9.2940527074687	6.50055885740467	10.989368161735714	18.084194386260283	20.900760973428856	21.917795822771083	16.279657614500596	17.390722200518404	19.5975289526858	27.251972534524253	18.408981116080426
2.88	4.458571988388724	7.5847230304297195	6.311147626042731	9.137076414000134	18.589591585289824	20.456295628828116	21.03626087712891	15.9542156934843	15.94448963070565	18.382485423567154	28.139713759288895	20.83610632910923
2.89	3.8746583013020945	5.238349374626431	6.37598950136542	9.479091105843183	15.816860106323896	21.61243640068621	22.941018518523716	15.623829782844918	14.21596398254872	16.998044843003502	28.484168081409855	18.881049063422434
2.9	5.049014221898194	5.638964792131061	6.810861749822453	11.61770960318321	16.3083738919687	22.226623319554932	21.14324834360756	15.195681147880855	14.650263195007328	18.817851053359878	26.30035128869388	18.100260480538672
2.91	4.676480518959735	6.124671066309202	7.756308239418763	12.044457062317278	16.28559488666675	22.617090042491494	19.491598346992266	14.843522769601138	15.741580998510829	19.122469099550575	24.315167141086526	18.65439926886062
2.92	5.339069137488332	7.966060269463688	7.853496726313284	10.12649092051752	15.387777861900776	22.067006867290093	19.436516695757867	15.484463743155457	15.641504799107281	21.656922598899737	25.243058552217935	16.830165677659643
2.93	7.407596184150903	8.514808306953107	5.202723004947411	11.202674926038997	15.060496816216515	22.06784838499593	20.986992567596218	13.525687379491666	12.821149280437359	20.23548600433046	23.649773786319933	17.661427441705005
2.94	7.867416716139871	7.807954408950693	5.025567807490031	11.34233677155158	13.87517557981137	21.701768565913174	22.32976305882669	14.250453874017381	14.869540783718476	18.273080269742305	27.384142490250905	16.094994235697598
2.95	7.86262318251307	8.812143587890983	6.398796830548956	9.948202157670543	14.922792380655295	18.845831061705482	21.7152905905021	12.229817212922107	14.476615095464984	18.931105677394722	27.67825902227798	16.83691227613775
2.96	7.518864133804524	6.856440803043423	6.48130440272461	10.717075191537837	16.277265239542597	21.69385257639262	22.06243457353459	11.638679125794669	15.522661808652375	18.132312619151403	27.01163484994758	15.946358840327846
2.97	7.440922919974669	7.476953781854216	6.9759436763495755	9.479738251647396	16.633088364955427	23.731850200545097	20.626497338050086	11.053038605482303	14.026927170307799	19.76181751547295	24.82635685784595	15.621743719715818
2.98	7.818708625130418	6.333850151788964	6.907770538256192	8.943926229896844	19.174614831822904	22.81229134761554	20.644431022044845	10.93084275389524	12.891613993996286	21.239019789483425	25.11884210306346	16.447312239860967
2.99	5.555915050996066	5.9864218680862304	7.121692791869558	8.580055492666947	17.77529354778819	23.10294443290715	25.093565834027842	11.133538099474658	15.495814044513367	19.281087156577478	23.964769969699784	17.088344092812605
3.0	6.159282207960082	4.29316719251781	8.175394588591095	8.19910058086092	17.462625084208607	22.728269703560212	24.04158837544561	12.528179508677248	14.918255110367372	18.978164987955815	22.727351135122284	16.140428465623252
3.0100000000000002	7.467684722481965	4.175786827323255	8.822969241001811	8.997743907999277	16.398505424798245	22.696616745531106	23.054537421707913	9.15834062774229	14.571980634555803	19.7813783681754	21.670677960805673	16.227239639269104
3.02	6.798381604545925	5.785493704643237	9.755512872231728	8.038887163865585	16.19856251621939	22.89663031741758	23.789001411765952	11.837253562615595	17.03102926469447	17.72080594201202	22.333789428921577	15.682972192430524
3.0300000000000002	4.7533443438974325	7.0700781913592	7.505915503792996	7.304259245996986	15.718055529746517	21.743166802703566	25.169512153568597	12.746258966272336	14.911778666352095	18.868168792307902	23.181375562618705	16.494457065150545
3.04	3.452155767406201	7.181352671752216	6.994283572109013	9.796990525096012	14.223866521432134	21.156744007252097	23.06559782963666	10.713327326241263	13.799770314432271	19.79992134771214	23.463802272796443	18.27543514701697
3.0500000000000003	4.745641523285193	6.259948592237557	6.88110416911182	8.187004644408548	14.440076505517863	22.490828830855833	24.722922534075156	11.990072719394867	12.37642352487714	20.031255618129798	24.77827408030978	14.983707756846895
3.06	6.054128739021457	7.9269017831539275	5.294291847449239	9.047379192055025	15.70295549545578	21.694827687169944	24.32130485661624	12.460776841667606	13.740363401851491	18.590656813075427	22.777589963307744	16.611590549631167
3.0700000000000003	4.1875579455242855	5.5017987613677475	4.599052396822152	11.457544229086613	17.28569419176244	21.789599583971274	22.202718689838715	10.299988320908136	12.671457373558349	19.090997263331005	25.501055598866852	17.257097678209327
3.08	4.644574044947801	4.93307477096763	6.031664063940519	9.755364014539484	14.576796428637463	21.867532014244667	21.70634987199702	12.934897036191137	12.200988834778416	19.815817441659533	23.472719192296516	15.45268302029507
3.09	5.449212032852686	4.8603424588464925	5.777906290439076	8.13533062699114	14.567702671521111	22.270450270464508	17.85899989802054	13.126524097475613	12.353031645227244	19.68289499679018	23.13420581800842	14.95327355809474
3.1	5.064622562140676	6.3619118153814656	5.4281621361136185	9.505687226804689	13.592176448077149	20.72513768942774	20.82131062647868	11.715980219293046	12.862013720518052	18.721351040401398	21.615534435517553	14.067677419865467
3.11	3.7307060613341037	5.104876634015521	7.937626107702406	8.674240981512412	12.840775680788083	22.260162271952215	22.320331329243373	10.60049180982849	12.051523035692444	17.450325132475058	22.53164318507173	13.720081411947076
3.12	3.1319504086015897	4.430414101545581	8.773184817349486	8.99144628568892	12.110773258824842	22.507555644928143	22.00207532074949	12.056065562754432	12.710563267984767	15.53397343012475	21.815611117228613	15.55616102745196
3.13	5.110344132028904	3.4405908342113265	7.4748747478420166	9.153904318826001	13.628142621430937	19.912064398357376	23.80950997950052	12.422619811050156	12.442394632413713	15.795117755014452	22.671981315413618	13.755400744455272
3.14	6.496964691945935	4.374909750562225	6.356717908879107	7.537975975811063	14.408621993254505	21.126678041486656	22.50160520523663	13.268038005421602	12.46361652177283	16.14677189690907	23.28029304568349	15.002968330286407
3.15	7.311693757975305	4.456462585828117	5.30365792946232	9.406069755197384	14.317598225085804	20.5434361057721	24.15996320785427	13.545529764069698	13.95066887531166	16.466253444172295	21.76350747171563	13.068129871583121
3.16	5.600411972663877	5.116180765680377	4.6255194594310245	9.869693437276252	11.933670049405151	21.031905822781454	26.401000138310668	11.044876272301213	13.7779870846499	17.39929782406334	18.427489703046362	11.53188648545529
3.17	7.112941543834925	6.528239991602611	4.95601091711959	10.14856043305466	13.704638461343942	20.717739454412996	26.314994371678008	11.931000496249064	14.194194177791985	16.90140227542239	19.249978729041562	11.918133051511026
3.18	7.83784040986944	4.024030210158915	4.182946806811722	8.378590776993038	13.856117231162965	21.546684988243523	23.583247085382165	11.062839924563875	14.042698267196075	18.98034020137999	21.326994795732737	12.360708494240804
3.19	6.523894559295469	4.651529541942043	2.911589463520785	10.494634168599582	11.106573793535679	21.869953912980545	25.073018704721704	12.57068583355022	15.069330058123915	16.370596690484824	18.918228261051702	13.510070395424195
3.2	9.869748393654744	4.370966474447794	3.682465990333197	11.056220759696961	12.15120069129785	21.752662016938828	24.99832440381238	12.61000430301218	16.80997340784974	19.520027194964282	17.72828570460002	14.187845382958137
3.21	7.3192312596199605	5.151029234721748	5.145057559916995	13.79138653318371	12.146123020721674	21.88955509591283	24.99306999483641	11.248935043909315	14.487361027700326	18.005647032859308	16.80667302695715	13.239233267110498
3.22	6.880862965753672	5.8255850577151405	5.088154936595262	12.762047786009747	12.245409007640188	22.208692179653532	27.207441639029614	9.69411342096918	14.631797968182816	17.080793097495302	17.690921663932375	15.613635020124606
3.23	5.120033985296169	3.6973425812379683	5.566681401434371	12.385725815574489	8.705416461195593	21.659778807691303	25.71514926664631	9.126133030993504	14.981441364392596	19.2532084856598	18.41020771615314	13.949382028654519
3.24	4.948873300427356	3.883690372192034	7.794180607353512	11.856697672264756	9.051169726157429	22.209003912706702	24.1797726713796	10.026296748241753	15.888715258568972	20.303281473000286	18.75233592664136	10.921684246425372
3.25	6.591850792586408	6.170393472599857	8.928814343094642	12.688915194025151	12.011874627991464	22.6185760419505	23.510840449906528	13.065661641911264	15.943827379471688	18.967262460126676	16.171402837989522	10.186901831541773
3.2600000000000002	3.4167985981750193	4.535830034673919	7.820013998220048	10.177240514273057	9.989600715446493	20.914303334164416	24.237119969005274	12.63066097521949	17.407372734537994	20.542053991839825	15.168841958132383	10.739747756716168
3.27	4.2609817906721785	6.051414349272184	7.138147448308957	12.53475692007638	11.54064661834756	20.317668572874815	23.852005649042958	12.047127031116393	18.060999918816787	20.11716448797625	17.193417119143007	10.559044821898807
3.2800000000000002	5.193043849076836	5.936520935946991	6.8753424925589295	12.115185208465798	11.755244279488041	21.700010722416682	22.874143595539678	12.360645813347862	19.1585369620756	18.798375980050583	16.0601769894552	10.081159999047722
3.29	4.0445453321709435	4.734907332164797	7.354302334689405	12.028290164842533	12.390566074167303	24.354928578656562	22.633943751397297	14.064417246397111	18.144178219255554	18.505398802218878	17.698555573409326	12.456612986283721
3.3000000000000003	3.0714292270597103	2.7881431704486785	6.460528332796243	10.262479070305075	11.023101764419748	23.567152063118964	19.806634331890454	13.915965678065215	18.384432772074298	20.860200087845595	18.815444955654314	10.400625962497438
3.31	4.112077998970275	1.4503227850541303	8.320273308184214	10.772325346219606	10.343995242488765	21.42877218898454	18.38568054932788	12.950497616268548	18.81042380148922	18.947416273125956	18.012355044302417	8.509543887478609
3.3200000000000003	4.510208857444009	2.501001121913801	8.590359922403897	9.639089678978452	12.539066577020987	22.61136503389338	16.94308097119629	13.570084027908429	19.197526821777444	20.675418769081396	18.716701318898405	10.72908635425046
3.33	4.642411155138083	3.303735634865804	8.49372614848383	10.477410386847916	11.876807515267053	20.558308891177358	18.943933565898444	14.169090479745282	19.820045646476487	18.43420575812533	19.81998543686792	12.261866299648927
3.34	3.679996448522009	3.0978068219603916	9.122228605224297	8.459862881431258	12.397369076923974	19.883270466447545	19.16383545613413	10.29195676420571	21.36909734205701	18.85243982825295	18.015580981188716	13.44744432446429
3.35	2.848596038755381	2.642043408957436	9.618105564194375	7.337824575664373	13.349756163723807	19.441910678690242	20.03095824555165	10.271561404535344	20.669556095822315	17.484920523245233	18.342298705215715	12.791886881403707
3.36	3.0935714882760945	2.2129170986011184	8.924171090665345	10.209169378119505	13.704857645602093	17.429740326841365	21.09860644160387	9.54109072406149	20.0783056592175	17.261011217628027	19.959504486255202	15.284585608477617
3.37	2.5058258158204816	3.0288170052267005	7.766238697973689	9.346720892717295	11.40113141929992	18.625736043844523	23.938489085204626	11.747669075129338	19.456062315715755	13.595637060824174	19.239779360414246	13.801868441661565
3.38	4.080211168603716	1.8002262712752848	10.768824273470688	9.407494193352697	9.873642613628009	16.09438180055042	23.597856325139325	10.935195943623206	20.674841499352244	16.34657349447055	17.970829939849274	12.585262252640314
3.39	3.7534662149331055	1.7061487855705184	10.488561350528363	8.871431437405043	9.963865149118645	16.533190346486183	23.18005833083057	12.370607233781552	22.087343346862777	15.95134534403839	20.669487279001586	13.815038457184537
3.4	3.9948536076868635	1.4135200142499513	9.054627557477293	8.782861790389079	7.426482116148866	18.048702876730278	23.01384455896246	11.879186118748951	21.39905340565285	16.97976123020986	22.421148150183196	13.553025643876753
3.41	4.81081647548935	4.022031338842726	9.081166658984408	7.817967911816538	4.840972138333097	20.263830701271345	24.43825208587746	12.347787984608185	20.185067228620923	17.473164257498315	22.444583735201746	14.116125067204747
3.42	4.258010519868767	4.240373091613126	10.107661665462695	12.63950047477386	5.280163709316372	19.17181160310273	23.335096061507308	10.700464904760828	20.16997500902777	16.43668255033913	22.597186550094563	12.572758181964431
3.43	5.394211314361051	3.1229154177160043	11.041113751394217	10.364357637716145	6.527496660961692	20.445416581195857	24.983947143648273	10.023015673414923	20.09102655893514	12.62478350725212	21.86691658164828	12.212337055803404
3.44	5.770200334785333	3.782303728219417	9.799256055304706	7.455674699540895	6.886528432923409	18.553453369250587	22.94423539631464	10.571804781977544	19.179863542826652	14.434436506278482	25.53095832256861	14.506230231936293
3.45	4.412039259698853	2.2596583578274227	10.958046707344675	7.592355334041142	6.7228225079295205	17.466494630929976	24.12939721397545	10.961040282112933	21.9866752328334	14.215154397953864	23.865636899863787	13.89946495507076
3.46	4.194575066014555	2.4164167268261476	12.40158157371383	8.03653891741421	8.97071183838983	17.06653451247315	23.512088083397654	9.543137013495647	21.398247603930493	12.727401765704034	24.088927196964338	14.689930521003468
3.47	6.824903439469098	1.599509382334365	7.836661020126746	6.6704467470226545	12.222260534754543	15.90346595758395	21.79483010164271	11.194378234322599	18.997238196333065	12.679107451445248	23.76986320274773	14.84028281137241
3.48	5.737793589887717	2.187133565840231	8.085150116879053	7.62646073036338	9.73316663477317	16.03713502529554	22.325710525913173	13.153208621598942	19.588145386918786	12.487281770980774	23.72205772142544	13.969326167679588
3.49	6.077548368849865	0.6601712746256282	9.209971629273205	8.712620535498289	7.931881195920076	15.968693052806294	21.574886775541685	13.730416895588007	19.215903150940065	13.076113004313324	22.333040016474595	16.129064671068832
3.5	6.037911059396494	2.383124145546158	9.705003184564717	7.041746356082419	8.99109512822864	17.147692778889372	24.832436054336128	14.408155964366763	20.743958065130588	12.543972645631042	20.86217193416994	14.592444036322068
3.5100000000000002	5.00217780688288	4.3869323593896565	8.521006655438942	7.475811988482885	9.444808330899619	17.487268672907025	24.061784462605313	15.579439017284642	21.645858216788426	15.262193032261065	20.44860986884954	15.947723680382836
3.52	6.680002765090922	1.7493677650929975	7.806295135488027	7.772729584514375	6.171022823600201	18.10693629768682	21.140639987320206	15.27790126972991	18.706675421879577	15.51210303797561	18.74126951264935	14.432996695211324
3.5300000000000002	5.899775131665472	3.6703971930854746	7.920935207284301	8.608647602278733	6.430484210205161	17.09191654931408	21.20953777908955	17.614012326408655	19.941658603886342	14.18690510849362	18.921003588388484	14.8508449565169
3.54	6.613849483547859	5.2222923367185325	8.42947435281792	8.51603483364441	7.169040710052081	15.338189930338187	21.516594528335897	16.268501306327185	18.0107970578525	15.205925779114681	20.14834781532044	16.76905811269148
3.5500000000000003	9.357311138912387	3.0226022382131945	8.545278015735148	8.444512579897138	7.540120370629987	15.683061706895124	19.777955248963494	16.69745643266635	17.336485032000763	14.459485584171896	19.881725609314795	16.029171694279743
3.56	8.657684666073687	4.912131807369225	8.70752894612251	8.63974881449282	6.371169793652366	16.225659552533077	21.36947788728674	14.46022539910893	17.82337185606545	15.607036061241438	19.37757232688513	16.391104434182814
3.5700000000000003	7.9092311074708865	7.347870702685408	9.640830728027371	9.899193141335264	8.226959633500517	17.314836043418456	22.433750464080685	15.010687150976196	17.689439170144443	15.975226434633644	18.46862503195866	18.12705526678323
3.58	6.785870827980493	5.5350011011286275	8.659358920901727	10.309997543176486	7.957852846634821	16.536259193447677	24.67129778891381	13.700096982097971	18.635428166291707	13.357034382916298	21.026934911749613	18.34871541982589
3.59	6.9888497382421555	6.057165330345555	10.794041837737973	10.27399358763947	6.7579398108336495	15.90477834276493	24.663466823568076	17.22080588026174	17.6926447445565	14.808685781402113	24.017059907380602	19.17764490261077
3.6	9.067514991521866	4.963616841748989	11.868663054581885	10.531558592071452	5.7316398204385886	17.358265271046807	23.462651827007036	14.02296081516219	18.70965923845053	15.22652163769949	23.43665276792319	18.598457080226606
3.61	10.323464522033834	4.771147148510401	14.699752765765115	8.444727589743138	5.333341849574894	17.27224341485475	22.31372770273763	14.984747641919013	19.820725440029836	14.736760632412084	22.69031872481214	16.53246706738805
3.62	7.776708206246372	1.1369458942104518	13.780102491203928	8.209066976761571	8.2943235289777	15.043160346007326	20.799274188945272	14.637997091422584	18.985254688788256	15.169744007249687	21.842906352428482	16.911579318668842
3.63	9.296836205265707	3.0417874764397648	12.090620251995553	8.50183254733063	8.746223488944281	16.551557836334435	19.937121801774214	14.780887358355798	18.097910307181465	15.536796687067092	20.91927500248465	17.24373595018892
3.64	5.4945081310587325	2.904027579346584	12.3456158155389	9.044588194999466	9.90251031730526	16.56837153080636	19.516929960953835	16.616948444959178	18.89508634203721	15.921807757878346	19.257793344422375	15.159818841312736
3.65	4.486432844552002	0.7126449890502347	13.129091558920903	7.043681473760023	10.82288155901387	16.758418063061647	19.017027289557248	13.966775831845192	19.567247868959097	13.533766104427553	19.58534966945264	14.141799642764271
3.66	5.3431538337554985	1.8845158852700572	13.535476646358555	7.783481948072985	12.380813864400753	15.680741693512958	17.825071580474642	14.31778772742024	17.883234361973315	14.97567400795097	19.10577629274778	16.20975307039217
3.67	6.394378386250531	3.7791511017774693	14.247989036931346	7.489290244521712	12.3640067564029	15.930001766495307	17.859641970716343	14.196912215638166	19.298521899874725	16.478358332209048	19.04460353030945	13.80844095457718
3.68	7.0784093301539235	0.5651926880972069	14.056230027189292	5.630641343000658	11.844496148104197	15.198784214	19.40856265660075	15.451645483791303	17.81178717217014	15.392669902389887	19.70829578261357	13.682339620671062
3.69	8.846845453657956	3.799251083736632	12.697714413103384	4.769564922387733	9.54459453399204	15.734655816686786	20.19504171352825	15.531937290623198	19.10973046507003	14.641779128685304	17.42124124549662	14.539275177352726
3.7	7.866436987893237	4.843052154050886	13.588980341143253	5.1540990359134105	11.322412558930157	16.663890619247553	19.41736161349259	13.354106196669118	19.179098048319446	15.786728888535187	17.98383057441672	15.222520935562828
3.71	9.68280026930916	3.2439338965033495	13.700854746717276	7.2167790117014485	13.334121807546891	14.156730193320245	20.60118116698214	13.076890392966012	19.724082992788524	13.582667990211853	18.474934204785672	14.53049672624091
3.72	7.515983396897769	2.8724284164295955	15.127802986536816	10.311382399545716	11.368516072002587	15.911441830929625	19.098632144277325	14.28836042182386	20.29252894824256	18.904638125594172	19.55784863269093	15.12225428772898
3.73	7.324565317271625	2.8040479087171644	14.177543593636747	8.681344725221743	11.361662078141316	15.100930260372301	18.790656579934094	12.23662309585997	19.245708640263235	16.300574795800983	19.008427601960346	18.76902574825271
3.74	6.071629706220581	4.147356680463623	12.289589853725465	9.942659932116541	12.06213230778525	15.511527421608667	18.676266939856536	14.152012465382722	19.215104036798188	16.077207176297044	18.566480497947346	18.685674318490022
3.75	5.767024415856385	4.4213187837869645	11.679231011954208	9.825393879314127	11.849182546550596	14.639863436080864	18.505154416359932	14.604656616063762	16.394085412126152	14.340620220737764	21.32837898584114	18.94648312974182
3.7600000000000002	4.444350955515865	5.214957057524289	12.97414303518595	8.744785546667945	12.388194119044487	16.211343032620825	16.740737845163984	14.098388004556123	17.32025673349377	14.439257026968498	19.68223419464269	19.870085606316195
3.77	7.3382815650395345	5.63061616748849	12.494262691177546	10.417838954585012	14.25257990344784	17.081747252688878	14.949040494106928	13.79121980763853	16.40175362129873	13.62472430038395	20.832454741666194	21.697886788541595
3.7800000000000002	5.0145987970353625	6.461642536638423	9.987321084897337	10.060652642850856	14.658932380853395	18.642089152810946	16.43469518542232	14.63623131292448	16.88821018318506	14.375400249741826	20.725143230606314	20.68302196884849
3.79	4.023856115899088	7.687257443323323	11.581481182778536	10.450401263742513	13.157816350874336	17.56779361959364	19.522479907153585	12.20903459748118	17.88449437363097	13.038212414070665	22.96483803401562	19.652055394010514
3.8000000000000003	3.9635582889358147	8.673840730619304	12.026439709113316	11.362008872119809	13.35012127061218	17.531105101718406	19.08059453431511	10.51918963335426	18.142794649562983	13.269658247344745	25.01005981356111	16.911502524296324
3.81	5.141523137631381	7.711789429417607	10.372557530290424	8.66106993790609	15.379893119162226	17.352940093169074	20.429817939830286	10.84237411736628	21.482080323447608	12.313026682592108	25.551692935561757	15.816502828933103
3.8200000000000003	5.892204722536653	6.807374659630477	11.913548011337049	6.750198461181035	14.216105030203352	18.751933737844457	23.6308989632214	7.899975247920527	20.672338860275094	11.997907410137373	27.258620044627154	15.19576275805134
3.83	4.6288816841026446	6.152044452404823	12.38568866863692	6.750972652779587	12.38963679013387	19.33923211142038	23.043953768826903	8.886263508696143	18.58555430434562	10.477594225054837	25.496533050203805	14.135509212013163
3.84	6.362115545447827	7.813360476804288	13.738178528778851	6.866586407863007	11.812358224325871	17.721880724358552	22.768556734352156	11.379343055032923	17.260618416763435	11.225422216694792	25.730363994111674	14.527400708419847
3.85	7.961514788978823	4.708545767441698	13.947210778286221	6.095374749360776	12.631979353776831	19.49683160362961	22.56800927486892	10.802954631542296	17.23795941899573	10.112438493410224	25.74323627799334	18.1399925831275
3.86	6.361834870275745	4.33503711331134	13.428543561270267	5.486111525835736	12.65578197815242	20.87000479965356	21.288109599519938	9.007125067205395	16.5277960916087	11.325732429413964	25.94095732620421	18.22256231803455
3.87	2.1757620660505395	4.293207413218289	13.192766331741637	7.933369356425917	12.67678240051164	23.267736550757842	19.410999915105236	10.114810882061436	17.003777873792178	10.154282421476132	24.823536869873003	19.465430053571577
3.88	3.4946025262959735	5.257745122208474	13.12979761481336	7.200727296836445	12.562395140585327	22.66852051618175	20.484278289206003	11.808541510265187	17.872907188258587	9.351210613228384	22.91995456945823	17.47417365766153
3.89	4.8203065618450776	7.528678269368259	12.296250068843328	8.390764205148598	12.535805988256294	22.009028144513536	22.10592915224233	12.795533870189752	17.308378359857745	11.11163480798306	25.587691189779427	15.827397165951163
3.9	5.412492764000682	7.469042698331009	16.02627552284215	9.281626807871314	10.60030245683286	21.375575179268242	20.83881843267481	11.630244150381156	18.366175427814028	10.236450113280135	25.619415322462856	18.10214015702332
3.91	5.685465381971828	5.858347489252555	13.836656883988276	8.900478863283068	11.508692557580218	20.325249717646543	19.54436285261602	11.279506768324373	16.544403848956453	11.004283144845534	22.692794722269323	18.215935011262566
3.92	5.7036369513414105	5.169463062233303	12.83899519609458	10.29835569880379	9.407164708215594	19.899033990315537	19.764920413515554	11.641056376215705	17.848625246861513	11.007410863408882	22.01978828097278	17.439926305245113
3.93	7.619419992438293	4.905891726440625	11.741270383809768	10.09602162199165	9.853078260941286	23.713368379880855	21.524740992976174	10.284984019088249	19.051470400962252	11.127750796959722	21.66829490095649	18.917313859514394
3.94	7.800548438342468	5.347966587615241	13.286321627831487	9.237464602509135	8.395684193705156	21.861449829726435	21.862745903572574	12.540060633714708	17.425194160631904	11.760660875869693	20.84988805653231	20.624745371347515
3.95	9.461610816021814	4.473214526331055	11.637887027776108	10.01096355800835	11.56864361734955	22.3624931809531	19.96982227815443	11.33426400007419	16.494908003156507	11.348485279569035	20.48462874022686	19.016300123886147
3.96	10.011714077510275	5.020209987178842	12.339690127879319	8.574893331244917	12.513641213302277	20.060252471389635	18.925844066137863	10.304873896617563	18.602799043857484	8.710741558793588	22.09252214309103	18.325136369604472
3.97	9.086896905676843	5.697115050593318	13.367720808942536	9.579893967037346	9.785442989836826	18.443335490266968	19.359510912249686	10.62171894674077	19.120053745704652	6.358035756322077	21.797899503251557	18.832823943277464
3.98	10.548688748753044	5.926942212293803	12.700996810861163	10.386587963142315	10.137073457240698	18.4779819279276	20.159965809196194	12.532741096542033	19.5595083381883	9.976432074694417	21.593822341850633	18.625212836955434
3.99	8.995533635097388	6.414110814091605	12.625498843505536	11.6466457422069	9.696531477346674	19.198721496679497	21.17912218109426	12.977843075566001	18.89228276052327	8.709944041187454	21.743315928657978	14.78552371147758
4.0	8.236959164328487	7.249961847861086	14.184632952330954	13.07730457587767	11.904611145904026	20.30913453616937	22.053167397966412	12.580922638634473	18.22530728123357	8.291300079300061	22.592186739575837	14.193742208892948
4.01	9.996361761612516	9.247074584237845	14.99089253681705	13.001997559640852	12.17057792399796	20.294720302104167	21.236172990659725	15.187224245497127	17.97451539583835	8.226054539600144	22.62041844793182	16.011281898948457
4.0200000000000005	10.671038429261543	7.144366066622645	12.645089490616698	12.20152797353095	12.133756925821723	18.146154009400398	21.3549657967894	13.274855734820607	19.523732462077305	9.629053410880157	21.786853807228304	14.573419090913262
4.03	12.237535365976631	7.660293975277156	15.417067625179431	12.094109255031913	14.312155794766834	18.597714928980906	23.60204576411455	12.103116180864111	16.624243662244357	10.35946621686551	21.623018674523557	15.629108451624655
4.04	9.623959508270428	4.80985466351961	17.186759166864007	13.93389041939597	14.329317774407416	21.03849215436188	22.873297147148655	9.591911834015105	16.431174058981384	11.018997274497838	20.264130419935732	14.897862381387451
4.05	7.3263164549399775	6.494869576624551	16.97444640950279	12.604917599711214	13.639920365473486	24.526680619797894	24.225713470481914	10.003485331314469	16.484735951521728	9.798591317149599	21.037298247772682	14.372194377548995
4.0600000000000005	5.231693023399424	7.1215142899425325	14.495781140366484	12.398543609993455	12.361318654696722	22.629230138998675	23.494263086508127	8.788199517574869	14.91301731599271	9.30397420663563	22.589560106557375	15.209285942194093
4.07	5.898842918309987	8.39975361832907	16.629387360716162	14.033538520993336	14.955679727962686	20.10473037551381	26.03526474942942	9.379678883861185	17.007164083421106	8.602317876549833	22.277949508071845	14.768644480445918
4.08	4.87771757573162	9.235808602621528	15.161487470348881	13.570423853065916	14.095134650522166	18.66391430745527	25.75844006075493	8.771526207926142	17.718326142280162	10.666796981445922	24.775432938688304	15.05742840364498
4.09	5.038122496714512	6.864802351175544	16.16974537522053	14.559088182968956	19.099619565851654	17.953555373353446	25.201475144603815	8.518239833466126	19.22753485410026	10.872384049838503	26.3446950435901	14.107299829169973
4.1	4.70882456378667	4.171502466523675	16.03597598808893	14.828500381235477	17.500315511075296	18.490442283401443	27.41288303167743	8.556879923333863	17.5863823901514	11.027921684790725	24.697327907358844	17.55294155171615
4.11	5.4687016365733	5.1157873509171905	15.032863112548773	14.149833122752732	17.679636408156167	18.967438519454703	23.817396505314328	7.07571400544569	17.48609145146905	11.512095144409013	19.93303955294648	17.399752379905003
4.12	4.918494673902451	3.567621133218526	14.894061589766947	15.319089941801922	16.46535340862442	18.487182461069278	22.97274616339942	11.748330425127135	18.261343935372352	11.245211208569769	21.83528250337757	17.922563944288054
4.13	6.684879729749199	5.382602632049421	15.406741284217977	17.321970157080177	17.983728485827953	21.145085229629757	22.727386536839134	10.375079466685396	18.22982957233111	11.558116854547675	19.529442547960155	19.16961970095429
4.14	6.992536762749006	5.643774585716125	13.989211097358067	16.929044382972474	17.026508138485188	22.844755985692554	21.443052786099912	14.657067329063066	18.05478094641012	12.528909359126613	20.301602505226302	19.071299672654767
4.15	5.673226045298852	7.360621553206642	14.425916944101099	17.54520243168391	17.833004649077484	21.698707999904755	19.878635897012337	14.312378327456159	18.80198770777101	13.238490953485554	18.9999955013	17.097115264822186
4.16	7.264677704467891	6.911893593895211	15.693360066835265	16.965964242473227	16.24811693613548	22.725349484049524	18.681654981512224	14.24989092948093	18.393810543760704	14.80791527660453	20.806359223750352	17.496607168845145
4.17	9.156269720013604	7.494588592225478	14.443576428602418	14.892317993781662	15.50703430419579	21.201039188634546	18.119326833941244	14.58318452133954	16.956701575090626	16.319056417734448	21.983199407219644	16.733305210854052
4.18	8.009734681245728	5.467616311911091	14.87214748617453	19.582161991905327	14.255805398445014	24.204140027879415	18.14657327262497	13.025931617126833	17.100653287064844	13.679622739405884	21.91183599369508	15.91563853307556
4.19	7.206002458565651	6.054563606094615	11.348821218611533	16.316695432830596	15.506075977031003	25.0708110956094	19.59221123086091	14.774403800505793	16.036313812343113	14.649778815843463	21.5864398643464	16.731416437005162
4.2	7.0133048921263725	8.767248869246862	10.6271505305819	18.37643604864811	16.47516190413716	22.60216502223544	19.40738923552462	14.76251406731017	16.022265056270946	14.50598689836986	22.06126139212434	17.05065244973697
4.21	5.7034022442444705	6.811639719293114	11.537304697016395	14.764173968743924	17.812417994759432	20.568951597586903	20.04400579595052	13.78571603182508	16.322690285342546	13.31367036216484	20.898718618619846	17.359394080322918
4.22	5.865368842635169	5.90133798454656	12.402447727673044	13.597530537500948	16.795024044224355	18.585653659261858	22.57807918071312	14.102414964830515	17.014515835997894	15.20676764103915	22.079364690743148	17.216652516007823
4.23	5.903359045998053	6.444241477976464	11.556707553368321	13.756332665024543	17.179065002713983	20.130513324607165	23.18399650786489	12.116710050176964	15.230643263146979	13.59411661510375	23.006109754664593	17.894405881164534
4.24	6.945393667658302	7.48863377505872	10.783285984132188	13.312001319726502	15.363895547590692	20.614925365249217	23.95553456973732	11.69088447931092	15.427525913195343	13.704819544486549	22.75032546947753	17.52203306687596
4.25	7.632486944708305	8.638948853066331	11.636022917604768	13.646824265864966	15.288456746281659	21.557488244715696	21.911346658720856	12.475859494799417	15.58446219287272	13.548362694522412	24.809925321370795	19.434610224603865
4.26	7.042325750705622	8.878487432722075	12.760417624640995	14.723827222999375	15.604796533485363	21.315008596978767	20.114669516611215	12.256148379581308	15.488437962380788	12.701758824988579	25.187846223305428	19.304674104945473
4.2700000000000005	8.766082624188833	9.62431774562994	13.734279512771392	16.0843486311788	15.84214878020323	19.14233654545679	19.099635743164658	10.785019325395837	15.713113330523573	14.390226544831554	24.614178544501275	19.04718880457531
4.28	8.773398628663347	7.500360629854797	14.42128035809217	15.855699093321679	16.005777122286137	18.151730622300786	18.870185440998654	12.889445505502854	13.712501225089577	16.117516266232137	24.632779280833596	19.15843091459604
4.29	8.763660462366978	5.231767300512084	14.267486452679494	14.541916875814444	15.27529732058715	18.79792408719101	19.536438743434502	12.692005651205628	14.695948022849885	16.448168599430296	23.851877882894208	20.2888399939599
4.3	9.269611791424344	4.000356511751756	12.50632763597064	13.328942364558554	14.606234798857056	19.40295006503024	19.318603208827902	10.055534993159547	15.520660823865743	16.204555008797325	25.608498634941952	20.300350540188553
4.3100000000000005	9.883142277138331	3.4500461238966715	14.570028116028206	13.588437608932297	14.959701150999322	18.31147872292652	21.666249362164677	9.47509871466195	16.148756732822743	16.15135434102361	24.406694175183407	20.980286350832166
4.32	7.858295952333365	0.8870021380562039	14.571114388456976	12.780760615943924	16.377959400752328	21.564975116634937	21.156972400812638	9.21585843042132	15.602107311233608	15.997706800603167	25.092674820498793	20.688724882148627
4.33	7.880984757259295	1.430173006098397	16.89515024917072	12.493650923429012	17.17931272221413	21.07638739691859	24.449972323590117	10.473655651742316	16.316595826820713	15.279581758545072	25.34632406663974	20.671847671682105
4.34	7.145254254144149	2.1013266577534857	15.290856406822634	11.797197285126751	17.20697724243176	22.472095565303515	25.023334775337858	11.032649788937064	16.722991080408285	13.503420011105971	26.26528508040644	21.41510634352706
4.3500000000000005	7.324637288054686	1.9192910593355106	17.774898352885394	12.915062529252749	15.796675428061626	23.328458753195065	24.887430574817582	10.80699381441855	17.476835839367862	14.664492896210302	27.978683358440136	23.378878805847684
4.36	7.492498436221161	0.7799275799204678	16.68676943410597	11.204210092916643	15.377739643320565	22.996093441343962	24.477410076232935	9.178431273327256	17.210651440402717	13.57129402643237	27.40689800553285	22.460300941037918
4.37	8.092644775916137	1.7894844607365772	16.562122723372436	11.299907612917073	16.058962595752007	22.5174141815894	24.535766059103956	8.516144851603622	16.402646633280035	12.89374696953073	28.185215021945826	20.885733958253393
4.38	9.029627394392817	1.4725688236070495	16.1489093559739	10.600764690940368	16.96396999605612	22.15161322701486	24.570422903371238	8.917563450946494	16.770140870566674	12.680103901274462	27.482331900846873	21.62110008625867
4.39	10.517999628757796	1.8197058147898368	15.573148332747987	10.655680056252082	15.712720698041894	18.82454783059359	24.469919656108914	9.632768238479251	17.73323355833417	12.727740172584678	27.644328940482115	22.420219947160597
4.4	9.80151945899818	4.242440795701522	14.74622004552473	11.562594653640165	17.32431097503183	19.41291693053775	22.615885721077003	8.090959698367616	16.34173663985701	12.659120956703713	26.450704621079723	22.031575540284898
4.41	10.54756772095446	5.869250312802341	15.61570518607831	10.90917596974793	17.572639981516573	17.756505095311383	20.802100635729726	8.403965420197235	15.028462973515678	13.654058114114635	26.974017561659526	22.022593720842494
4.42	9.615453980940856	6.489424832895245	13.952940520179078	11.982296199269017	15.688965765827492	17.818078837389404	20.91564025560937	11.701802220450274	15.731949171393659	12.329112099829551	26.95492479084702	20.661729470900212
4.43	9.223080279209686	4.37442243039131	16.34285867241109	9.623048461110931	16.770761575664977	15.918621066213644	21.05610769287383	11.251314891221936	12.840612699974345	10.666780499739893	24.97149923316402	23.64937712322758
4.44	10.906724405881201	5.379765711080928	18.426688808430708	11.10028298729497	16.82329002510224	16.86929125616292	21.92390633044934	10.394620302902217	14.278890258426312	12.607706469898954	23.07915505966651	20.76262164425856
4.45	11.053954564260831	5.298301879478167	18.213614268527134	11.167608948846919	15.848432423076044	15.27436846101063	21.991911671509573	9.84425219020876	15.046740942265032	12.265740781825032	23.239581628707587	21.76214991758965
4.46	9.995672566968175	6.099527213615089	17.399469183004253	11.893308821831205	15.624516504323564	14.86167005396771	22.462376844709624	7.759718814769151	15.096900341042605	12.376970088207077	24.509584072557786	19.715781173471058
4.47	12.673271569084426	7.070560691809363	17.55800842367246	13.732266922412462	14.377866848361446	14.952856701677769	21.617229199351048	6.291006729886956	15.075203018894372	14.870980373282501	23.238399939305047	20.902100918260675
4.48	11.431905470771081	6.848958301991235	17.917488789074728	11.369864795858337	16.19001419806472	15.78771782964201	19.477662210061283	6.412493654433722	16.258853857812422	13.211511417358814	20.738380872230273	22.199480977264326
4.49	13.330367831119801	8.275928276576705	18.10606600803678	13.11419202734041	15.953281774583028	16.30691385705507	20.57280318320257	6.199038117384144	17.830717282418444	8.342599356803698	19.755354761648295	23.14376282288587
4.5	10.833678922257132	8.385482769265652	17.360541879278973	11.664914591129412	14.690483154040027	14.7639602159909	19.279868255334875	7.314973863400061	18.35838917966118	8.911696101042226	21.044782045200332	24.16019936697217
4.51	11.151337322333534	7.343289768689752	16.154401898524185	12.043738047173491	14.600746871228031	14.246148657677532	22.626066010928376	8.341839662280254	17.59971800985	7.646885092700376	20.385434983887357	25.189490327228427
4.5200000000000005	10.726936079415362	5.810605574189495	13.404287186272176	12.169419190705687	14.373776898694185	13.102578919657704	23.319626839588647	9.764612463469092	18.71974881987033	9.483995263437022	23.10667476545752	24.77851674345798
4.53	10.445581969613253	5.9250102834789375	12.469008168091976	10.831429924299195	15.663436351975188	13.060290270021511	25.178067226499305	7.632765278809248	18.59891038775263	9.273758020112133	21.475159561796605	25.043700294290456
4.54	11.187561626632796	5.172927542123284	10.738400993017363	13.177310315006425	16.00233763127851	14.990568112158877	23.452679858008704	7.238152129472743	19.660851656760652	8.345054634557714	20.99969289469151	24.691664881310498
4.55	10.04781471784934	3.9464294356083855	12.361667757927274	13.403932408336384	15.28378815654828	15.513990338182301	21.43842410033455	7.907713981329041	15.46226098993212	11.256135172939153	23.13454033946283	24.982985152305133
4.5600000000000005	11.021911272067241	3.912338770919624	11.162593318392133	14.309937892824525	16.557685160890134	17.427447007757948	20.25577143870315	9.921906290281829	17.08883263165185	10.443308201996746	24.487568448988007	23.470360722583198
4.57	11.633613498680317	4.731635775994116	10.073504899485828	13.483271647210168	15.93938942305525	17.20635311589236	22.04532129307242	10.049006898338869	17.166248358413945	9.114228275401555	23.24026636922936	23.59888146579128
4.58	9.728719576115243	6.222559338502089	13.301663319730219	12.611716485564875	14.046378648660335	18.62256661268501	25.30188136651689	11.346673449040821	17.7233657282038	7.594593243191394	21.500050869727506	23.727824556544814
4.59	9.411196979705084	6.72460329264771	10.042600904079395	15.114644558278796	15.531240359361007	17.20475368813132	28.013465289818544	12.884187431872649	17.69182372704897	5.930445352634891	20.713501375750173	24.128176481310167
4.6000000000000005	10.33686971629241	6.864256898123838	10.098059364610748	14.273038955182388	14.387171706026683	16.444808334794956	26.305489634404015	11.270145347838096	17.133493928991758	5.409979295607185	22.396148303621555	22.838929621227646
4.61	10.908510435285955	8.517277554517094	9.438128332048276	14.859675542285958	15.038881942384245	16.490335552790857	25.660875269814376	10.95571676173306	17.257770340770104	6.502611388230635	24.98493575730521	24.3947706032879
4.62	10.061789522879128	7.995896404510003	10.234637298193912	14.351123360607426	15.859663533214524	16.30693691315445	26.205123431793837	8.941621470506446	16.76362766558412	7.348593876700351	23.412207437740605	22.98080472949548
4.63	9.718454210491076	5.2008350148625455	11.558023671344325	13.144558179535062	15.56266700285536	14.938567501075141	25.39943923249223	8.900649585998744	16.31135522500023	8.500453003265266	25.28331728281638	23.30418639468537
4.64	7.758170871545563	4.9763604243277495	12.781618308700732	16.0536500360803	14.487126982513281	16.505816198103794	26.077709711254393	9.739013780858611	15.823977188889634	8.494814102582044	23.187545771192724	23.55766327001248
4.65	6.854930274106628	5.220882969479919	15.326078403652128	15.84669912838356	15.172253328501238	17.714398275872398	25.854021825646967	11.002845056558554	13.666938383067754	8.32943759464855	23.285117107776383	20.232114647758404
4.66	9.621296117498229	6.7691306757921215	15.066415645310457	18.19222885669981	14.362103730200687	17.76525169870918	26.20172886022331	12.960028074023885	14.98041011495342	9.818593517706251	23.518281871160525	21.621493672027682
4.67	9.105186198409877	5.019507833636079	14.718936666424446	20.296265764609384	12.881495212259097	17.105496188575998	26.005265474290695	13.900420525301708	13.807629288350432	9.862027555580275	22.1474609768359	21.21282383428568
4.68	10.891891484593302	5.354773396305426	16.69607651882402	19.207813127150033	12.40502117568342	15.17991443575901	22.751397658468157	11.356678386393279	13.731912994505674	9.111029250966562	24.01899841264593	21.813413499130796
4.69	7.4110722033111625	5.7001241146906025	16.781104452475343	19.922365992046284	12.404752491671722	16.875556694489518	22.70182355352462	11.752340801516901	13.084251277755659	7.602818289318475	25.135877886630592	21.614276182690258
4.7	7.807233843427023	5.661571057454525	15.76980874491282	18.48095575707703	14.000126585298041	15.368374864955936	24.058631108796483	10.674183576622264	13.791261299392952	9.117338835233204	24.7219949764472	20.7164151812706
4.71	6.871506308930812	4.268648198697105	15.159069351435727	17.83678488299121	13.201452500494037	16.137142171912227	25.489129315298335	12.38824276337094	14.253565254748603	10.10902502288572	22.444330256102255	19.134734917838465
4.72	8.160633235646564	5.353694024672393	14.742652816859335	16.478369238928956	13.059198574500071	13.074807689247836	24.342053381367066	10.580273672600468	13.191446146469703	7.328677565796976	21.752673522527544	19.448289411797546
4.73	7.548084149709669	7.807514220447741	15.187892671056213	17.136040226369012	11.626389314499113	15.720941316047814	23.352297069430715	11.510037040442157	12.47669401966299	8.39388362953458	22.3538022729022	20.878467500738473
4.74	6.477291540346453	7.335427061393165	13.659288285558869	16.787080039693958	12.119371783058902	15.640670541997604	22.900303776380028	9.749251787262416	12.603314463434101	9.227426453356543	24.06410854249712	20.49681427372289
4.75	4.135410709877979	8.38148524419616	15.987438694238488	18.74246584502329	15.805121811527634	16.938590122609465	25.83595515726581	13.650425626241312	12.303013726421945	10.250634135138933	25.056413645241513	20.85948444134146
4.76	5.685177897160932	7.531926762484337	14.265451867981222	17.804461431784397	14.94738669394703	17.494857053052545	28.12165511095346	14.941651151205622	12.829006296524188	13.667650125113681	27.522874116632842	22.63263500477412
4.7700000000000005	5.701777298689284	6.874321275690831	15.425809012592822	19.339887890106933	16.828370932531453	18.14422793521999	29.089580483173794	13.184971170121948	14.59716757900482	13.007535689276251	25.355814632465666	21.160022622151093
4.78	6.860292717310816	8.294290317239419	16.147199367891144	20.94479803781964	15.442287418937068	17.306716089326283	29.089027005127267	11.975553130482885	14.477799653856453	13.794558615753186	25.969632209510433	22.54143569069057
4.79	7.723746234960899	7.5647615097838345	14.964217269636016	20.186795759454142	14.73827255731398	16.423384759231762	26.796617347845324	12.070308144776247	11.889421614675813	13.36205520921106	22.424713830140643	22.93127038124526
4.8	8.434079410716235	6.439338129913123	15.5510050244545	18.538360222892308	14.613935540842784	16.888553768396857	26.47167115722691	14.446056376676438	11.471300363359248	13.993008477212106	22.56340169745844	22.415450300109114
4.8100000000000005	9.468456575834473	7.812286513994821	15.482150427245736	17.846082125654007	15.135428100007609	17.78073255643003	26.63274304119666	15.412854885774479	11.063238242110753	11.229740719927042	23.502964266511484	21.938999536755638
4.82	8.83166028385824	8.337331754063872	16.599319816155003	15.667294206121786	13.819094346362883	17.57243718188098	27.96535410793931	16.40466145642423	10.256964612018193	10.657601663620559	24.092887444843825	22.135462669298676
4.83	10.642381951430794	8.84515800457702	17.19838480322153	16.850468250716315	13.649571780091936	18.42853149898826	26.140821653886814	15.266948058457835	7.537075673706361	12.26311182515461	23.447623392505683	21.541691079863508
4.84	9.53479552770493	8.419678433247148	18.792431224922765	15.961819736559823	13.635677291867923	19.35003299299393	27.1755035583173	18.51092957093614	8.440480617591621	13.121595039466989	25.133031205176938	22.180456702555347
4.8500000000000005	10.836228653384863	8.665647483311792	19.282550348885263	17.118264264988525	11.795422851663906	21.336477455813235	26.550376129020506	17.96533537858916	8.783243714623286	11.908491656258803	24.87058408424796	21.194927854046014
4.86	12.39101415072777	6.8789628080728855	19.669251250024566	18.356141125375878	10.50427275155344	19.711815906012315	24.438726066868806	18.52934513228693	7.409551060013757	11.922487606029689	22.73348179389662	21.805230791544226
4.87	11.936702607090995	9.12391626144641	20.46739036273217	20.475620925629002	10.731433533762653	19.274604930710524	24.230905030933844	15.68917993420404	9.734284351437617	10.890327894968044	23.28606360409582	20.33255110948408
4.88	11.34337815262681	8.855227105829485	19.835035140123967	18.57354229861319	8.976874913364654	21.235587901167918	22.048651557365005	12.434309551387749	10.228663752421689	10.74089903479214	24.922334747662024	21.282004935199392
4.89	11.516257520770296	7.969901636531204	21.26263641783197	18.084303604819823	8.567023937137293	19.091197131690336	23.850123201397	14.628142758033988	11.457939600560394	10.595400742349762	24.790902379257904	21.44001447345438
4.9	10.858685517569517	9.863580963809236	21.243952647126207	18.167465797887562	9.331511788923816	21.055289995133986	22.323983760100425	16.142325321875372	10.318686663399085	10.817251800757752	26.28131953247902	19.60293176713908
4.91	9.095309801115192	10.152610188397263	21.012100689072653	20.400304561204912	10.00980245135172	18.731259564974998	23.408416868759865	15.633735352859036	9.305895802708608	8.634994333299733	24.476935055748623	21.84962199173324
4.92	11.925306812044155	10.842446017857494	22.660658665245904	20.43930860728221	10.342751035685382	20.341980451332503	21.138460771252458	15.251385199402412	9.190023653477677	10.299147033965045	22.877084407625922	20.656135731354674
4.93	10.410698090381674	9.45508727373891	21.93563503869446	18.777818880778987	9.996149939963205	19.27350906732681	19.81470790089619	14.551418764409172	9.971403287422648	12.648956158534762	24.70246119541984	22.871125273817945
4.94	10.564075272473893	8.845855106405356	21.82628899493057	19.26609714305356	6.609383476258427	20.962986562410915	18.477225822311024	14.799751100968091	9.393468290393086	14.32351625287319	26.494048486056435	25.015860165389196
4.95	10.366377619296811	10.104131280514459	23.485028245042404	19.469318664424225	7.766729828834272	20.032802501856153	18.592569098905464	17.21146538535644	10.470821674942364	13.406954819304458	27.167715730955273	22.48896531324225
4.96	11.5026205095699	11.30647853262957	23.30282707557719	20.82112384039792	10.47425432887539	19.451581932751438	18.104882845504946	18.108427181283236	12.714364425423712	11.103539965286787	26.77961473105056	20.553866931063354
4.97	9.759796647509079	11.796939230304018	22.95853026413582	21.191748034952845	11.888911353473294	19.493731921220057	16.935775486139313	18.50420361594495	12.539514947244767	10.929759315684064	26.779401825736933	24.518021921077665
4.98	11.302838389297214	11.381776917077557	21.2430616333324	19.003263679301703	10.670946787346047	21.636130085402282	16.74403139309859	17.58528173153228	13.452036342086664	9.37091028121676	25.602289103625893	21.39244880404853
4.99	11.987669818333696	11.600594672844815	20.55864179425667	19.8694795395382	8.447252705703653	22.686967406124204	17.36344828487871	16.90204030773226	14.20769473275723	9.937171220117419	22.9563181417665	22.654968765055127
5.0	13.80373732428191	13.639499689249348	21.632004891888755	20.416287372508737	9.757201828099076	21.514214963982315	18.936529735529305	17.105693987408632	14.961945936721538	9.055303079993326	23.25882644938816	21.462127740176655
5.01	12.581574489746954	14.58413315932521	22.642187418334288	21.337265842210144	10.770048697503027	21.663507921376535	17.955880795972387	18.425101783236276	14.143640861440815	11.442536498639724	23.73422988599941	22.023102607449577
5.0200000000000005	13.327339535353095	15.347271886762176	22.22693456427792	20.54857563162054	9.207367345493342	22.053481590779377	18.02871963387371	18.517660718474914	13.274634894378941	12.484947671050149	21.907342727413706	21.09816069834142
5.03	14.053859826622482	15.480016761703197	23.12218152400641	21.275188577755866	11.468737269716943	22.412955724257262	18.76437357820897	17.89492151345871	11.693668982655272	10.03994856359832	21.956847035972004	23.413640028450995
5.04	13.555060053776916	15.260005718449653	20.594992070418296	21.846657479325483	12.514998168311157	25.09576630639802	19.016714495809982	15.124557423659974	12.94157242606892	11.635658243071369	21.714310055274883	20.271402002661027
5.05	12.497655534125249	12.328477539781543	18.986496778827814	21.901243568064118	9.883280015340299	26.001105825247066	19.45852409165843	15.347380153770807	14.108071630230477	12.745434786683415	21.455344194737425	19.969457930718846
5.0600000000000005	10.100215085469864	10.859027414691923	20.435461292418147	22.281717153707643	9.082881392473054	26.0077923149659	21.184270241280892	14.828299480834172	14.283576768442597	11.882432009711513	19.762905854236372	18.339062370789474
5.07	10.056231614466688	10.923956095063817	19.19680430666701	21.37004989097455	8.358531700145411	25.103606864521623	18.421738665871107	14.921457572021898	13.002794499340137	12.968697148844916	17.87975990586778	18.052709679244963
5.08	10.398660705938449	13.098744009460823	20.372509993664533	20.43341286612295	7.500277257767579	26.42859909542656	18.289712896821502	12.869885002286768	13.325389617229456	12.326305076965648	19.33447375178506	17.14900582492921
5.09	8.154707613453933	12.690689441870518	20.235300621822017	21.88877595543424	8.850947043831722	26.122010834145595	17.80523178040688	11.635714464823959	14.408817093247949	11.468586762143207	19.287913105014795	16.876780435723138
5.1000000000000005	9.136176177227545	13.030402399524586	20.89689849798292	19.667869144316484	8.217478910690756	26.55721796685679	19.077805082516303	13.571217074447551	14.646365425480173	9.626880154176105	20.600198527666592	16.671569677417565
5.11	8.266064270294073	9.701497023165896	21.785287984990376	18.92073358761849	9.875639048460046	26.262217832272864	19.396670330805115	12.11230829689106	14.247188962442062	10.863915546012361	21.321796682415478	16.621080051154156
5.12	7.941334161316311	8.886474373996457	21.78394026634325	19.508088225518424	9.547166690910188	25.238952370915815	19.93836026506997	15.420312685079494	14.320392540267768	9.19694689162586	23.963741337440187	16.00203951770614
5.13	8.746369304071758	11.894560469690383	21.07657055468407	19.016577247330304	9.015714995106379	24.810625596864263	18.623506565495312	15.455330297403064	13.945458844654825	10.350003588163986	22.528848673708556	16.740390791058
5.14	9.935421100761983	10.657479535043413	19.663103145860642	17.769173168924198	7.683560455522442	27.67051210561788	17.344220279008766	14.959208981650645	10.553013465508068	12.476576317646982	22.69114706600566	17.534136605698833
5.15	7.7846530362767545	12.460781137300298	20.966248846595352	14.358191926281423	5.780353909751458	28.10561258980086	16.38948988595298	14.57779744064626	12.122929721614616	10.662022160425211	20.91096064708499	17.273569214316787
5.16	5.8170755542192225	11.582686190156517	20.7297409437087	16.132847315190585	8.825370795773136	28.02723238778095	14.221750284614142	13.930264196660396	10.874379216494878	11.594637793913828	20.383443928858657	19.19300300243307
5.17	7.04628080593951	11.200419392229298	18.59794377347647	15.800111302672228	10.242777673393423	28.290943162131967	13.006968661419732	12.093380439343674	10.207782839787868	10.29569145072718	20.253461862999245	19.49545914569019
5.18	8.092203467075496	8.680735683751097	18.876886902337652	15.362193456932674	9.029827630759849	27.330955223615767	11.207367265721455	12.373077395259093	11.273956994895576	7.253412327044639	22.49610739812408	17.819000710790625
5.19	5.659118763221193	7.730122121663235	18.39989150050491	17.01410733556542	8.487668647543511	28.270060698140234	11.875263978590091	12.365498025770313	13.4598192921565	5.638183779381723	24.337392887355772	17.005470440599474
5.2	6.638878736442278	9.296646323726334	18.92178947239498	15.537793324214789	8.72587412101053	26.883615613428045	9.921230404486094	14.530119578580582	12.626239740346493	6.672296671322033	23.612467863309107	15.556059900599829
5.21	6.133842133997969	7.104304338456148	19.004804448285398	14.95885074104077	10.93791037807029	25.10550728056248	14.354768600635413	16.1704984301349	12.720758108729212	5.817921471984439	22.75589855692519	14.034084021846748
5.22	5.73257304507691	11.37140093032071	21.08300239574593	12.392762751952938	10.78257609052298	25.147692625246535	14.516151707333877	14.84947790532056	10.350011499684168	7.7721423832259955	24.308007625205367	13.105099084452142
5.23	6.251404742098268	10.904771019887903	22.73742051665705	12.00824270715114	9.066134630254133	25.974518958083312	14.961522466666432	14.02179271663835	9.953667328310125	8.482062204313323	24.93945176660024	11.694291871618985
5.24	8.023254638670826	8.505746461672539	20.9781125659245	13.479634488322874	10.479591543344997	27.087836494636882	15.509335546403502	14.722154447010157	9.451021783734475	8.939520315817743	24.66699429662961	13.722817331556527
5.25	7.324157532843002	7.3952909794892605	21.51300762593442	14.282086969406922	10.189251631225408	26.18652356866489	14.414484846168529	12.581052797823691	9.401871085198316	8.777900444297384	25.327983161492856	14.797289360520807
5.26	6.071705722142008	5.366856386010307	20.021224145444815	12.45876371438009	11.85683512779656	24.550526995401754	13.919167017042152	13.381234893894806	9.326429987289556	10.546114584451834	25.268458067046517	15.48021943131308
5.2700000000000005	6.322131185719652	4.425954271560104	20.953641326458055	14.26651254426164	10.953096792917158	21.867338883121775	13.953277335595823	13.942235770333443	8.746811573137515	9.421690850078368	22.033862894060217	16.924142623202133
5.28	8.549890427777708	6.8654456628536025	20.639996173045475	14.769889952086027	11.80357193309623	23.094521752453087	17.06071364402071	16.50229888253515	9.407390703664817	8.12157964068773	19.74367804680425	15.183395736442016
5.29	5.857315634853007	8.294028010383569	20.474961881388996	15.863826278290228	12.84901758505649	23.50523693869353	15.234445858732498	13.198049545716819	10.53356976803339	9.112659631314207	20.63890237161375	12.60318207029537
5.3	7.632475495970561	10.182288057225676	18.777131334013326	16.286436976915454	12.527963937888236	23.62812013047758	14.055351250063769	14.831754707988315	9.661298585777457	11.662459290163248	22.19868693999714	12.91856113330695
5.3100000000000005	7.037935774747016	10.393110086014559	19.39443252895605	16.350278150845966	13.792524440788734	24.093563450083042	14.04994543034431	15.642157746679903	10.933751734622815	10.131881288367177	21.91446325213134	12.29741706541811
5.32	6.816950983635336	8.930387732302469	20.769725927376708	19.68476749767768	11.173901284920058	25.654458415848858	14.414694600846815	16.83577334673441	10.35781181330982	10.167563032484603	21.179898782274034	12.20213353854972
5.33	5.237038609094077	10.282106968271515	20.363476627845287	20.87693926308664	12.848945535903399	22.965097999745623	13.716534217964496	16.59480628284936	10.102815289332296	10.159505269820363	22.74068964472472	10.683236199166657
5.34	6.847092336511864	12.319147220181472	19.44376849572111	17.99819754524706	10.471306309847966	25.22601359209516	12.709869158848308	15.287560081323656	10.39177302841059	10.07644537251993	20.69216556765715	10.151774758447257
5.3500000000000005	9.058848337405147	11.993935945216638	19.344636789484998	18.353627574617935	14.259855142797983	23.8639549202345	16.153195078761527	14.915788842630645	12.430975156004212	11.09801944074979	21.272374735302694	11.03266130939248
5.36	8.053636024500632	11.847772233585475	19.084934203655926	19.15081135680226	14.583600458847995	24.824864265911284	15.54505186147043	16.602883484973074	11.177057751317417	13.07872625312687	22.652964675109814	10.438842728943644
5.37	9.926037661042672	9.885148549579439	21.02963098478961	16.832923610662085	13.460942696586933	26.12544438764418	13.685648183897879	16.900999242119433	10.42281293196457	11.916932852774147	22.539570817771445	15.35434990484615
5.38	9.701021566822735	9.975326424214627	21.061162394487436	16.226409552253106	14.066266624098592	22.6709216608924	14.890037015556693	16.809281837648342	9.909421955173267	10.557962398757063	19.545615459753492	14.949173581398155
5.39	10.723574686925138	9.053074504143074	22.64240342017019	16.13346330610874	15.006547522515335	22.507653114823608	15.989664202340244	16.759862335603103	12.923114672292945	10.146939859387906	19.360447046638644	14.606741853994555
5.4	9.847175999479171	7.967682780479721	23.470328424032207	16.13718608498079	15.561405689697043	24.065757470483163	15.647034554251514	17.34165346509272	13.278888185533873	12.866650175332264	19.376453781527186	16.37841586314991
5.41	6.949721126640242	9.396713802557963	23.205428543601617	18.311548557065517	13.066406413046135	23.622908294976888	16.1836580753066	16.713805980097064	12.627535644409502	12.47873356244669	21.781799077333467	16.615382828766087
5.42	7.740444903638773	9.75819479099941	23.973100855806145	16.373458128826208	13.765588531287	20.614442919916918	15.305705485118706	19.0932020992694	12.458065842685219	10.774732361517598	22.279021740429414	17.5560403801816
5.43	7.850446302149253	8.987122450669428	22.270092076541737	15.802572463736547	13.341188845265354	20.628729402670206	13.401648998693815	18.223512537105005	8.068619719093642	12.62375288757947	21.443423823467494	18.079251376137325
5.44	8.368004307731075	10.848485096118782	21.99098889026622	17.393217040844128	13.473980941565452	20.22471351831257	15.805598217068558	18.123694718734825	10.934832068778572	12.160952995093254	23.973224996344943	16.768676574861445
5.45	7.452370646408397	11.576598148014293	21.133574925375342	16.587943878137793	11.096352059993988	20.03298216621949	16.325482587456424	16.231692639564972	11.16018642862227	12.99701727175497	24.838267563003324	17.051317692278783
5.46	8.17069517549466	11.065193597075831	20.4294977345548	18.04629073404016	13.980712365988918	18.22658340268449	15.355358885350654	17.435260686568952	14.080309427393543	14.286027072470388	22.82613385221764	17.192846094020165
5.47	7.2539659570854695	10.462258593966524	19.947757533202505	17.509452068318417	13.878114894161886	17.473709221982414	18.903203916835814	15.402440504630368	12.211313048048918	13.397733157943664	21.67532902922779	16.03550077263704
5.48	7.013059129264434	9.419557328720876	21.22914473337395	18.194255166805178	13.409319052142274	16.03418478852596	21.259533296886612	16.152850415141604	10.556946916553441	13.32376173547462	24.600636686865105	14.403089412671177
5.49	8.532106798053137	10.978403278179046	21.840332503847694	18.39052975231477	12.872496377720394	15.649575103263558	21.278211362649213	15.88842862100486	10.238162949003662	15.646905714019557	24.95723442991027	15.616144610190487
5.5	8.341519736919727	11.046881555093336	19.888989833482405	18.95987033776495	12.887966871133816	15.313289535720015	21.173354150818263	14.527825998451824	10.559481138142084	15.7233812304586	26.47893563906244	15.587026137951222
5.51	7.5543049226532615	11.61406618485794	19.353763558113126	18.606838863639236	17.531283626055625	17.129034707251193	19.79683948698465	13.69484014938494	10.454753516750637	14.895759626785388	25.676604659982758	13.302099798339638
5.5200000000000005	6.709096536958616	10.59845831425444	20.197934973074627	20.993052137903252	16.338997109045785	17.132625583195615	20.408820924604058	12.69387697755804	10.866543151860844	15.377873806999382	27.132130213948333	15.410590715136127
5.53	9.710974813998602	12.189738612945758	20.229605090521623	20.573538162536916	15.07274685705678	17.803647377168474	18.706084634266606	14.668905950937583	11.56540908132442	15.343004638753197	25.2287251343708	13.77276365891069
5.54	10.203885557654402	12.462100093359062	22.232565922683847	19.74430840592029	16.516123179106206	16.185522407991726	18.913775951060508	14.488204102242928	10.316099906845356	15.497277147306887	28.737939328714333	14.635692668114435
5.55	9.104584727212835	11.889331688957842	23.666020518333664	17.667342039917553	18.13392927984508	16.88280455170326	18.126729417647127	15.859561597294901	11.017378361200501	14.634240238061064	27.765401486593376	14.461934739948045
5.5600000000000005	9.42383126943241	10.876835272876631	20.668136753684454	20.93894065679767	14.930075597385843	16.905719946802513	17.792670832761893	16.52457428653382	11.046309318512774	15.083963940692865	25.32443248140865	15.22531460896534
5.57	11.446910304819648	10.716340246594392	19.913286899271252	19.79137745436724	15.430529255559673	18.59187602799029	17.99148039167805	18.770439455660114	13.393821552860453	15.365961424700952	26.028939253437542	15.09427586052408
5.58	7.179577507780929	8.773533160856557	21.809209666015956	16.004335259147382	15.06331101626165	18.464419061996043	18.92571186786351	16.28155151974732	11.707775344266894	13.61936810862287	26.09401406592916	14.838670658602732
5.59	8.237826407363917	11.492339002528894	20.821213198716713	17.06096079782683	14.643172488620388	17.999908429469563	21.14070085018296	13.703541892717201	11.413297595773297	11.742409576565361	25.585809802054765	14.298040886258033
5.6000000000000005	7.940036240083214	14.3318567739989	20.4642163860684	17.893581420148017	15.06522904209431	18.66443359426976	21.136958093976713	16.515177182895016	13.113926435373669	10.723641784782505	23.811830975888686	14.688829019391369
5.61	7.838083818130051	15.184433877618691	19.356395412208357	16.349565201942628	16.456301704187794	15.754811799478928	19.899097243787175	18.37883779443028	12.543744748671394	10.9441247708416	23.66294879915801	13.315923492856804
5.62	6.273249414646623	14.483543510176435	20.13913311927348	13.71933092441688	13.870113805261093	13.330847253052832	18.431112502281124	19.085835558372136	13.327845098741726	11.334793364431727	24.32449901864949	14.053574097552186
5.63	5.059451195963435	14.123190334234513	21.263049859176	13.611882311404328	13.781570979558417	11.842851287141697	18.764754273427567	18.530553968247958	11.39147731559026	12.611811433476174	23.474774179451554	12.067375932221271
5.64	7.35703240584064	12.305550173325695	23.216866628920368	14.764893654100995	14.827963326058853	13.898940685968588	18.987455216159624	16.290696483579616	11.20361399404922	14.025783460421614	22.50759691853186	12.186427600416849
5.65	10.365393545263021	11.986260421340983	24.40370721251007	15.240932492161699	14.724374549610259	15.726873573565081	20.656658677011638	17.65584568468898	11.917847172586574	12.32160998413347	21.14860388113073	11.794692309262206
5.66	8.50406587651923	11.178015993254933	22.399023593984403	16.044728049470628	12.715368621474347	15.673847253792085	19.268102948791757	17.86734282195371	10.346415477677333	13.122048010447854	20.135375389473488	12.87874139998562
5.67	6.957042414915148	13.08142924394246	23.661437388962163	16.012916851117993	12.221827752228535	16.60260795605621	18.842748466987466	16.51172064206212	11.068805119248614	9.448880231208742	20.561289197303168	11.345295123282906
5.68	5.336294214112306	13.885205045427956	22.11150705706948	15.505331768549857	12.96032363130446	16.080765279903538	18.255694352026712	17.269909382245608	13.552039041874949	10.770265536378565	18.546099117804545	11.334769428772866
5.69	3.4267595208420882	14.109544587002402	22.694245958936744	16.907737441947585	15.741623434624508	15.569336778716904	16.906965446590632	15.392242481794842	15.943546262240282	10.71025565471752	20.721219080592935	12.465350678609274
5.7	4.358637066792947	14.334561306644039	22.017588593608764	17.396944660866467	11.878795252621709	18.454145641345693	16.133467288689655	15.072581921139546	13.239508083233055	13.968608234627544	21.469856685867068	12.5249303221537
5.71	4.933858743442998	11.641015934712001	21.55354700071415	19.398719269349247	12.791369566476169	16.113854947209884	16.317319053754858	16.277964025862623	11.853561608584974	10.339468729728482	21.604988479166664	10.977578823563011
5.72	5.7303040861563925	10.05758989688954	20.05526676095941	19.463355193092827	11.686266232367798	16.188681634332106	19.374957298734007	13.823754192092624	12.425315303178264	9.333222932635373	22.311706185748715	11.209145550560782
5.73	6.884051180825814	10.92517429158479	19.430734167538816	16.624622040278787	13.356095271342436	14.601133914398682	19.091415360836535	14.770514000316007	12.79483230099007	9.640580324928981	22.697119856014666	11.25374715548983
5.74	6.232941792289252	11.345876542231181	18.696606204340135	15.60046548675839	12.486694043890065	16.72282101320722	18.80110032548741	15.548733493127722	13.176732050315035	9.702982892171534	22.755991397506467	12.285807536582565
5.75	3.6279349228004296	11.0741557898517	17.240415506919053	17.5202859139275	12.39630718224628	18.000392994109827	18.454507376345568	17.079175518568025	13.174884834450223	9.50690478948822	23.20916281264038	10.875469405049682
5.76	3.4367854654540198	9.727261773480308	18.779272539326136	15.784850265503739	14.020938381353282	17.392750028924894	18.958718846166732	16.94138471805721	13.167624793223732	11.241040443273118	22.59499756054411	12.498530668650197
5.7700000000000005	1.9498431595615648	12.826039504697057	19.315569236544977	14.702926200577298	12.560893472654318	20.43627535794411	19.056077932813515	20.229351247662777	14.898567901837934	8.088389108888446	22.74299313982242	14.765500285737692
5.78	4.445591066404526	10.24735987480083	19.656381818521975	15.740718427335846	12.430599519089155	17.59482400292801	17.69467898850036	17.524719768961255	14.776865414820916	9.685271097705678	23.483281842375487	14.399936173058906
5.79	5.160800999695955	11.21325861139508	19.2986156241816	17.23147061485896	12.24455286196817	18.03656794215869	17.052673982310118	15.768517046066426	12.896000446388824	9.892974091862367	23.270065424579865	13.630202154193123
5.8	5.598576616207942	13.052838713679929	21.186991117894298	16.900543379542672	9.296371466870186	17.52707801705437	17.305714041386533	14.69422726663862	13.723063393478013	7.249128369782178	24.80368252142993	14.867867972502427
5.8100000000000005	7.119943875769628	12.142036438735504	19.74650594924151	18.952035038371626	11.318516699859916	18.753447158126633	17.25096887116032	16.00632200542544	13.93269772969921	8.40947465699371	24.316123640985975	13.43868809261901
5.82	8.819349940480949	13.254754336429125	19.227265425066957	17.342993314531952	8.690864006728665	19.060707791727946	16.983954482076797	15.904438822997223	12.8956535205191	8.975371499840831	23.89979092816364	13.770984172742512
5.83	6.886618614495927	11.711069356592146	20.8535700977478	15.718218129555927	10.634194447230918	18.584469056193857	16.133507754374296	16.54400223731172	12.913455590940446	10.352468309810654	25.42442306357613	14.58866395915651
5.84	7.767347041190653	11.681435196491456	20.00213896551888	16.85707669340958	11.569531129077715	19.989367138171485	13.087835891215759	15.30008478949562	13.323547441832819	10.49973696280486	24.102359258240877	14.214268144260254
5.8500000000000005	5.693910543987389	12.582584533373856	18.655126716690734	18.155986509878918	13.27111297233584	19.204248143701946	13.88338424456072	14.391147282942267	13.462099261538341	11.092944244838128	23.807102065214487	13.726971025075972
5.86	7.923287473349028	12.625579120310686	19.064535079515558	18.073557372042913	11.738224126853362	20.063449656649613	13.408918457752106	13.510045116587609	14.467002474666238	9.607271305555694	24.28849671253954	16.92505329153052
5.87	4.866262830345473	14.430821257216557	19.97001846636748	17.575989437202228	13.180340536805845	18.91040396043081	15.371281375587078	13.327736899450565	13.347242798615094	8.664698533898553	23.076609095335705	16.93984949180736
5.88	6.029439049106265	13.940653501546887	20.05301227395093	16.223542761638306	9.972714443899864	16.9731661015177	13.648216165947744	11.353831772808851	13.409034587509437	8.917257927540374	21.964819068561468	14.429295108370889
5.89	9.484818983141661	12.168144327423677	20.089744853211002	17.748178144256396	12.453017752435501	16.480153103583138	13.209238183056774	13.516698201194783	14.923737111797495	7.467153889267077	21.193023579703315	11.625238297200708
5.9	8.64501781428618	11.30776416838715	19.322671435028727	21.434414432064663	12.125250330458396	18.60833886088302	14.29499954920431	11.604284527179924	15.423129901192054	6.720635794947008	21.58013078150404	11.98968130795495
5.91	9.826822812145377	10.592811769960274	19.360261246640018	21.87024728553325	10.637244673473026	17.126536459178674	15.098009609786477	11.189644085648291	16.13183075588737	9.12470315409962	20.614439860272597	15.65150891996554
5.92	8.195393011206663	9.873116824969747	19.217916068253572	23.0496984131617	11.8602527785208	16.494713250625683	13.398329243813182	12.465986839535608	16.764122469858957	9.61562071016437	20.484848911009163	15.433969763032463
5.93	4.909107310795536	10.56630513132935	18.80323688296893	20.11565954724552	10.334635845529872	16.829604036658825	15.316496427794345	12.264447650224545	14.704079107869243	8.34490655714902	20.987277794402026	15.617434850422374
5.94	4.35470136919842	11.147866256617668	18.935071636814524	21.504873057128837	11.514789272871699	17.265859405638704	16.463090415976534	12.500490363074597	17.928063542445805	5.225052551328288	22.731540479933557	15.57471504140697
5.95	4.135790382897333	10.550968278879878	19.747154659476266	17.862155665752063	12.567613904033115	19.7575830210168	15.030206246083559	11.698827054926777	16.927097134505562	4.427253949616155	21.69231158860232	14.11595466626864
5.96	4.289247936391076	12.165548600240863	18.75786102316586	18.735547786924545	11.712993705143798	19.136039893086895	15.913618073939123	12.200664324457792	14.3783592529278	5.554281088925161	21.569242327054706	13.852127407289979
5.97	3.9725129907037657	10.971495550374321	21.093343391381353	18.590692666718	10.607748292826159	17.238556880925454	15.212379993139388	14.523319458264185	15.306671333779901	5.980876371407035	19.91357722893351	14.63823118383096
5.98	6.76777748178258	7.116321685323248	19.824307277869032	17.564307305304524	11.453822601184926	17.868145871678507	16.382783509952123	15.190475343785689	14.300636138580808	6.436898030507134	20.561969377106482	14.748096763626604
5.99	6.007335487304654	6.274121944012896	20.747957956353815	14.495200545740634	13.039157603597753	19.728867071060925	14.349366396222228	15.748337723818079	16.167769403485742	5.475249441896832	19.619881506249527	15.520247449753155
6.0	7.297116243182555	9.336120594976709	19.65932738246738	14.22224716720361	14.87261619257683	17.449323960744035	15.008068936153618	14.145008769293115	13.04757451875993	5.089795953334035	16.934861634385037	16.753639995567564
6.01	8.0123901291052	9.317914940489722	21.47780232289309	14.25277044950943	15.031239181473024	17.407929754353585	15.387732063882753	12.747176934027921	12.544917860158012	4.322416495361032	16.38182653965161	16.918774675049264
6.0200000000000005	6.638914429123031	11.055900404546726	20.677596545836497	15.822541826457797	16.104894027002878	16.104338687980388	14.629099699609759	12.872265776114965	12.035214957324222	8.143700010904878	16.0414291914943	14.209710589759212
6.03	6.3413194732610245	11.968183218178241	19.9049306119985	17.758022988783637	10.60013919519554	15.41759188521379	14.100742966775572	12.72816294022624	9.655233943157157	6.440334143717128	14.290270582881892	15.681359602394625
6.04	8.50906682788926	9.479921864405899	22.07409559912988	16.582898443737488	15.303840969050578	16.264721566180782	15.77042542554011	12.754562678995898	12.478588896553415	8.6963581819923	14.976784099437713	15.001952090619554
6.05	8.46722632501476	10.470568224131162	21.693741583298745	14.164206698985222	12.401120648122788	17.61853010452338	15.917078165382263	12.519620960518134	13.508595801484818	8.474040848501836	15.012952112651227	13.517581808897823
6.0600000000000005	7.765716979775766	11.459433409819741	20.660996620535304	15.406131849199477	13.998589895333392	17.128079791091412	15.271364319150784	10.25274841990031	13.447889577583979	9.366761423006608	15.158824029283442	14.109335034826762
6.07	8.324542725252375	11.404311446724323	19.723208436447333	16.891361266295103	12.749679830491795	17.492042750219767	15.170957732194571	11.634031763385618	13.886919827015682	9.173532604969743	17.63604774405831	13.732636281020998
6.08	7.257855557782562	7.8262202047701575	21.068329391204607	16.85871377403037	10.452191691445785	17.19737689660555	15.043714780280379	11.528566887037291	17.1115991040192	9.467996922806977	18.372035169384123	14.36275146976035
6.09	8.83267779148006	10.408056214437204	23.424096333587187	15.87773697789988	12.241042052160207	18.318822498935937	14.486052731042575	12.841395082488514	15.457228289232663	8.917867222952399	17.444236342313463	14.098875398039825
6.1000000000000005	8.242023507171593	8.462767366037236	22.290913992086697	14.06783418102602	11.223650371161634	20.229148560664008	15.629729455441755	12.635585794945289	14.742479401888648	9.03139625443407	16.103155434539307	12.668687438125417
6.11	9.346701674673557	10.257949676902916	22.768206976783805	16.290834558976663	12.502065878079478	21.059957499707128	15.187278176825762	15.18139737960058	15.171738093905361	9.689691966477287	16.057551449835564	10.625829719112646
6.12	6.7470288702864245	7.646378883294956	22.17039295265292	14.337776550785104	11.183001238202866	21.523203141270844	13.55360841458473	14.40245124288317	14.004949632462381	9.067260118132477	14.544672524049924	11.686246809994095
6.13	6.19422377739172	7.319698083041706	21.661856491170305	14.511469572404787	11.555861833658415	22.30587292963533	16.469733038939605	13.421592212259757	13.643558531583466	8.135784725260763	16.045928526368847	10.222407869963257
6.140000000000001	5.893220098053003	5.618783059344226	22.874343898501987	14.43375422615897	11.815074899915425	21.619577663913038	14.78593976073174	15.544822651412664	12.935065085229493	7.165245586554467	15.004191926487984	11.333499961154866
6.15	7.56810471878896	4.8774501168537965	20.02615539614937	15.53607956401796	11.099773529368965	20.847742168295923	13.55838465893001	16.29621160137769	11.761476946372682	6.644323339990222	14.450351492837266	12.08101769048192
6.16	8.11194028455614	6.925719579249628	21.502996212422058	14.005809804191896	13.907403175537537	21.406455515836416	15.49610696584728	15.262356396753106	11.688715032109053	7.180411333262909	15.768795846435966	9.682748875665482
6.17	9.503500783989848	7.839761089442665	22.190438307809714	14.366143890224851	15.016926465598578	22.576463651581427	13.741097195255065	17.423449232682756	11.478146310694052	8.321444682685197	13.96775939359034	10.04327078153917
6.18	9.074558946754864	6.427900589748094	21.510722263832246	14.134914020113102	15.076849186677457	21.79343830895903	14.530938147722448	18.107637796754368	11.379717576227467	10.709014497766065	14.436948667900072	9.392275591308058
6.19	11.556940615364907	7.231026388875557	21.665584831398384	14.522494370136007	14.35904213038822	23.389095315472403	16.090465201352018	18.256397015138305	10.797544826071647	10.696595059834795	12.986972721844555	9.670258227340417
6.2	10.900233437911632	7.100230497626934	21.64944460365187	15.61475696562602	14.294300488806691	21.465790508191862	18.058796967411325	16.1436791959499	11.271429780776339	12.439262431040206	15.15183001979929	9.481087685369648
6.21	8.257423896607316	6.968377968745549	22.344655979439775	14.851329441970082	12.942034867220263	21.733951626480202	19.080099425338332	17.358208267207402	11.09048223512715	12.845038677075213	14.20851941606259	10.609394794193012
6.22	9.241900007402426	7.438757315889715	22.24694545941889	14.708540358196846	12.100892430365382	23.528229480975103	19.794137016876707	17.71090772362747	14.080762788725258	12.60450042208041	14.855547544096982	11.02530815009078
6.23	9.012287620560832	7.597607713867176	20.009407633836904	11.914822658194751	13.216462378358575	22.47354191979978	15.730761843604482	16.62645833975411	14.794727412674993	12.3636404960133	13.598505813608364	11.400828070104708
6.24	9.05033878929771	7.047307290588718	23.017916911367724	12.303519791504188	12.058497078810335	22.63097609323975	15.040888538544834	16.256593756980983	16.492157125498032	12.29567120198438	14.964095730302486	10.669671178017005
6.25	6.530997465761618	8.39146403774518	25.073095705284416	14.100456541850312	12.382000734989004	22.821151821314665	15.879952292650211	17.208541207264975	14.21967079051438	13.742542321824063	16.245348778981565	9.696659070705786
6.26	7.163166705908559	8.092143726718154	25.028383458856432	12.101372078319026	13.799617705324716	24.40025759523024	15.959577496081122	17.094227427611713	14.48736723954436	14.520032258144246	14.6071527310403	11.713448654944576
6.2700000000000005	10.412596389640537	8.086710051601584	26.343753912842867	14.985152680310014	14.261231976259902	22.41573697730148	14.69951324082197	17.13164799369782	15.320965872523573	15.18283511464055	13.362741179761716	11.867012109673086
6.28	8.016139941948227	9.756998177331827	26.772136864803656	11.805779771931427	15.235557925588003	26.024387670519317	15.740053143629387	16.311316772852994	17.68467551669849	15.803901502096817	13.596027178603297	11.469177105540139
6.29	6.6235816669026395	9.164569560073526	25.108352181135874	10.598902998367157	14.429073067940507	26.2119964117842	17.579681423421306	15.592819962488976	15.126693489301505	15.418834965835213	16.826383770024666	11.686504859694736
6.3	8.572102649685355	7.222279514559064	25.88631281030109	12.287784980704787	12.952056658999075	26.15032368135331	18.175074530466578	14.566117066032582	14.395980106356227	15.562140862410239	15.004612527996702	11.0688763219961
6.3100000000000005	9.77509998309628	4.821449445004153	28.06207539642156	12.459600416239729	14.12062301793116	26.096331131352734	16.69694820611562	15.691527973529709	15.051277257387705	15.835988671955555	15.4853720839492	12.302746159931832
6.32	10.627616783345461	7.985257051722889	24.10762455633304	11.221516382771243	15.85377481703161	25.259878882527566	15.06055386775644	16.58198482626474	16.3635267979479	15.25813242046962	11.812767952170418	10.05460442103102
6.33	9.545223141346266	7.503643254534437	21.71994517050133	12.400972959952584	16.813000695508705	25.049016474587987	16.048781548088392	14.751437844871127	14.752609228892396	12.993601642701726	13.809317989471982	11.95399801694597
6.34	10.178493746493547	8.997389897885077	22.572444361010817	13.15198603615121	18.082991078682173	26.897374750330297	16.01867190792766	12.66999218639567	14.853907822731072	12.333948064299268	14.999914927079802	13.217940301603198
6.3500000000000005	11.679100787945975	10.15090447651378	21.09946190974996	12.643143536372737	17.606717057636132	25.558045697758	15.624104570303519	14.915588121534444	12.744863270058241	13.703987982317853	15.092253660414864	13.845702619806685
6.36	9.873815595991054	8.504932346132568	23.43629369581737	14.333080131915851	17.187902195008444	23.972897014308813	13.992007747375192	14.66070367802455	12.941743338296646	15.429707964879126	15.511470256607048	14.685932555239207
6.37	8.112039734723067	9.418369758043854	24.509127176630937	16.11189669104807	18.234335955284926	25.870823827236688	17.16709905576557	15.325308052763475	14.48810735259072	15.941105672300283	13.672543625419323	15.478589186831606
6.38	6.32520994780885	8.710541919783937	24.958130651826792	14.662531252473409	17.95200110517681	24.43129153890581	16.216191082108626	16.807257805935855	13.86285444089834	17.140800499892805	14.359105099564193	13.061072061539683
6.390000000000001	7.858606161198852	9.073459080051311	25.017861593762547	14.262148014706213	15.698846626942883	23.804868731283708	17.062954053306914	16.625542285165906	14.14759184336139	16.29376180361658	14.738024217433393	11.720887727111583
6.4	6.693778665035147	9.512992238494641	25.75898201057987	14.594401125416862	17.37271728115073	26.384305544777206	15.05490880826543	15.54585175867569	15.316435871572972	16.91474901527835	14.57530281545451	13.047648388021171
6.41	7.605719121316177	9.924779242872578	29.232958395896745	16.98660363049966	14.775674356055962	24.20943799147651	15.196093629517359	17.182243878309354	15.807461817204867	18.470874233747978	15.431901949945985	12.7533703442939
6.42	9.204328130818205	9.743079596058827	27.81267447301527	17.10041558118165	12.313756251075826	26.9767741898265	15.395679159591158	13.762941835154031	13.083879974630785	18.79324840546594	16.388518463904827	11.570798110269305
6.43	9.487486656276657	7.735195092149698	28.179705347985752	15.1820762128216	10.223469441197913	27.133905192802022	17.00623976225249	14.177147644607858	14.586441129669923	20.493086406796387	16.74337720918173	11.550410889272735
6.44	9.844032535150554	8.979645444764753	28.069224563171822	15.068251172635097	13.025279379487921	25.035011487168372	15.272907868010606	11.76658095578909	16.01236020369977	19.565800061161514	17.923339868068638	12.747453357301657
6.45	10.388879667394368	12.014944460414595	26.974744211195052	17.132678211942185	11.521392727075359	26.171004790528492	15.959456562478524	13.067602721162181	16.656955818730776	20.7624591609532	17.06740475489368	10.814725173683172
6.46	7.801292773817075	10.402312400608785	27.38044381968667	18.115741110565196	13.943674131572608	27.357971174468723	13.921676954282528	15.380854055851822	16.38870371102325	21.551319456818852	14.19563825739081	13.375353842142347
6.47	7.647799057071204	10.486275524449155	26.402848263045748	16.976804982538052	13.678494801402715	28.404816012267013	16.067969444434468	14.435673239391052	15.922351747149241	19.268369462505035	14.578749944590664	12.812369416303373
6.48	6.860260964281112	7.9936207058793425	25.607464777334744	17.634044781080547	15.525515696949707	29.519290407621746	15.626795508931664	15.726255612770569	13.813912816746369	18.41603005190754	14.396831776913054	11.167192357277445
6.49	7.155133748895039	6.246049518089742	25.179000374603625	16.608786346895304	13.21955905224671	28.651486825402937	15.598768629254142	13.20306626992484	13.452164194438964	18.38328725623072	14.490357751892988	10.261449052516058
6.5	5.643331590112268	8.156631795017503	21.02731239838228	16.214489119688686	14.58154160382397	30.083391234864553	16.13913293295177	12.126891468094419	14.755831210841821	17.668716013649302	16.02388182866532	10.007454299286838
6.51	8.385876909967024	7.870359101468233	22.781678458585127	15.719591021748153	15.03878435703907	29.795298738094093	14.242855650934036	14.141488041396782	13.027056998461063	17.472126477516397	16.27585176046977	10.977917356551838
6.5200000000000005	6.508600895074491	7.164621149779202	22.34193458584183	16.87511899357126	14.306937263431767	29.237940677569018	16.18982395053706	14.20255250515468	14.09673839864664	18.789995537032397	14.660990330026834	11.835232411134816
6.53	5.832152766553839	6.898533047239952	20.511718210798698	17.563638554508316	14.810614272442782	28.723060337852182	17.965184701381443	12.831040596413128	15.168076042296814	19.276669307659006	14.49223929867896	10.165011430571422
6.54	7.293903907157667	8.071910069472793	23.35961073817673	20.2586948589646	15.606757655260504	27.65659822371926	20.713429304711003	14.820839559635868	14.79845990358847	20.710617994020023	16.798316255890246	9.591531470314477
6.55	6.4546096005496185	6.4467695331639785	23.72041442194142	20.70806186240182	15.970391450673542	29.255498387099017	20.615173383982388	14.86221846562019	15.642414317877606	21.61245717180731	19.518657787127808	11.536462562409591
6.5600000000000005	8.197298541728097	6.9164936757023465	25.44498435749925	20.8309864126179	15.26767289098031	26.64787523424195	20.47073896436347	13.248578948302496	16.43881919699405	22.579283654302884	19.263924074555476	14.940635197437716
6.57	7.262705203583364	6.256875344526559	22.477309877731496	20.995716312107	13.724067992057421	25.38406280575206	18.657420058814957	15.63643156235696	16.683772987796168	20.959833082583238	19.007028382401387	10.501845481929607
6.58	8.404325059157289	7.496770463158973	21.485457049458148	22.18048623112501	15.333689828296095	25.805772883750635	16.858992997519955	17.357809670041945	16.573278994232723	20.240146952521886	19.20831552552319	9.863462685849585
6.59	7.388828764975782	9.161269778951675	21.128493912459955	21.90436354055307	13.966065826557045	25.543452532928782	18.442814838410914	16.80193475871241	16.546915433811183	19.833630781236035	19.190009256201066	12.634514937537064
6.6000000000000005	8.299741890623379	9.751485510620425	21.95812382681982	19.302948611118353	13.805190291707135	26.567633684941537	17.280854827347373	16.925415625710354	17.56748436891421	18.810266697420314	18.293477560721747	12.628625644260755
6.61	8.05710227713673	8.515826040647987	22.739709286135348	18.89193295323996	16.631586240975846	25.92016146969874	16.743682108197138	18.26888104791174	18.554831712757338	20.56807083428246	20.3373004596156	10.736101647628393
6.62	7.6914636102028515	6.816821041838627	20.982593009984814	20.20381249549937	14.49639825339568	26.583799456617605	17.047859337348168	16.8242546787924	16.779677212762262	20.062130306763258	20.095583861903883	11.611294457047372
6.63	10.460153876099763	8.929164090593908	21.072985548347397	18.45200622645018	15.393836043547436	27.523832196147627	18.542122428847044	16.71594967284373	17.137165227298404	21.872863156558232	21.135591157183317	12.258854980000079
6.640000000000001	11.54427193586358	8.878322096804709	20.00786643746063	17.85183085859927	14.755051145001815	26.155075710948722	20.253602779826114	17.619644757391622	16.36068492283522	22.67483546146084	22.39139131915732	14.605483433962368
6.65	9.823172555258829	7.567000964072884	20.457017473538492	19.897058801392088	15.538762196371762	26.897387935011402	19.121303400633423	17.32495370221354	17.012181645366187	22.73833143109177	23.183605754711873	9.89292802140245
6.66	11.498696494957843	8.343867048882919	21.497868818850414	19.595469521975136	15.28050353062925	26.93700590416147	16.52208859644365	14.603700113698098	15.963986634083378	19.562861671637485	20.838476783353556	12.948445458595117
6.67	13.009441677862844	8.781423126838103	19.476765483695996	19.70447957522729	15.230144117721343	28.635905332038984	16.069561760660132	15.318685146206322	16.146019763428797	21.11101038999254	20.479054458348003	13.409315254738683
6.68	12.204455326862693	6.125302982697252	19.843288216545844	18.281077154980878	15.83913865266361	28.990925423716824	16.196037938990823	17.237211669108927	17.61524927083766	19.51257054786501	19.65985063592617	12.623648938744289
6.69	11.71579100607907	8.468502414040149	21.193994187740472	18.733224768556763	15.280295938021883	28.442487645111243	17.11154788305418	16.956389185880905	14.819961643662914	19.295827616518984	20.379174282872885	11.079803074984772
6.7	12.806427214931418	8.194869707204868	20.777728086219707	19.12808535319023	16.179703197719178	27.842398594013034	17.418515617500063	16.460542673160745	15.684051138066534	18.78972291601303	22.827612912183717	10.922183276338842
6.71	9.50509763535026	7.16781992370139	21.264149236984835	16.385757977957272	15.495856810152722	28.04869308080386	17.671975897769922	17.01567378554005	14.506477972576507	20.011743466027237	23.28744031211099	10.980753416031927
6.72	8.980847412480186	5.2750591451009	18.306052370619476	16.565143089994635	12.73872664586009	26.674764735311996	16.15322796137432	16.57297217116534	14.994553353021848	20.916093054447373	20.623722445713405	8.747014366966068
6.73	9.21089965795179	5.663322696371293	18.180746090709373	16.23114089810649	14.131527097204907	27.779802331103564	17.174248897764045	14.250570250837054	14.921894593536924	19.109822155853983	17.708833446287645	7.126351523480426
6.74	9.864153446684575	6.8378110674507635	19.60846433650382	16.91020512688915	12.813251166875089	28.679312748627193	17.454604534803718	11.596920193577825	14.527017363425143	18.860140843714397	19.82500151483116	7.935239349625789
6.75	10.718898988420118	6.164704126557005	22.407854323750083	17.761043778555774	12.9608982795619	29.18922319157827	16.14606723857065	13.552752353133526	15.106172392335985	19.261797201561244	17.584058635043505	10.056582440568555
6.76	11.9847805612576	8.186632114433328	22.65936466987307	15.97584869906641	12.865407294830513	30.79960838986448	19.06543529501823	10.576100272962144	14.651833962571992	19.83017303473058	15.755692671435014	9.969051558092945
6.7700000000000005	13.153023529646935	9.216548055414789	22.430684009226685	16.92191530335084	11.084381755721342	30.173919160921944	17.550419047409274	8.92258784250303	16.317935416654407	19.999981099682657	17.63071541898291	9.172718280014408
6.78	15.242641689126662	7.831071002770682	21.24819352110575	19.011102304390725	11.56873257996173	27.527365489136024	16.28582219290639	11.654241193827477	15.29936353154821	18.624879039327812	18.68820968979455	8.700713930369888
6.79	14.503663897962285	7.5849063100377645	23.30396546131029	16.254333915834394	12.809523924811312	28.170182041079045	16.75670595332166	8.909809790786664	16.45251557584396	20.64820965544687	18.722016039153687	8.79376345241454
6.8	15.292166696021994	8.542898794176587	23.26572889753937	15.92710378845429	13.871836605262795	28.044036637724567	15.615229415755579	10.61727696441718	15.596317195605602	19.76206983745164	17.13649093745261	8.873132809843831
6.8100000000000005	13.58262795726214	9.399173490720266	23.46667922697544	13.35120715239697	11.341795097959764	27.788787780070997	13.940450647235599	10.847181472077628	15.059300322770536	20.370997985709714	18.2663436472096	7.1741314878955675
6.82	13.227449906918627	9.816729007612423	22.508560381346065	12.84482929170279	13.280556422369305	25.541444102745405	12.938260951081292	10.930458142543584	17.350047481041326	18.697953499521166	19.209155081324102	8.699294249963295
6.83	11.836611523794705	10.810114817681438	21.619675005267982	13.52219396969934	13.330887177475919	24.602144272236465	12.163163109479555	11.96951728558489	16.007021473072335	18.24390140343749	17.773639045051386	10.441615788633008
6.84	10.080071783654587	10.316449919190116	22.447004804451197	11.690590813414937	14.121605596481741	24.383555194916518	9.744464839263454	12.711672670496938	15.64592878672128	17.874369328382173	17.016242472171566	13.122245414380698
6.8500000000000005	10.17403349471396	10.074515252083716	21.492902904378536	12.46328890791923	14.867916120126415	21.61952667921023	10.429587016017006	12.107057011953739	15.549498815258925	20.922985774624074	15.04059096499649	12.239148713211675
6.86	8.633068249215304	10.436594958922802	20.683252410515326	11.66451871584634	13.534660063532149	23.345803638191153	11.049056896210717	11.864666455077204	18.456422850278127	19.70943320917463	16.10342896922956	12.160918412669423
6.87	10.068154760237425	9.641833855464792	25.458187198001582	13.063217713991374	12.172352629056558	22.555424973286858	12.48391310757954	12.46235469368261	15.766622908810465	20.560406737682307	15.839327459049818	12.200854486488552
6.88	11.06938163229096	8.998806478281724	22.439937821242772	11.675645673211113	10.527633851820289	23.389980373516746	11.562667303206497	12.33443261428347	15.735466043277835	20.969783748505677	17.468924407123488	11.550720903545484
6.890000000000001	10.289442936635842	9.82137399941038	22.96376886244897	12.82673339284361	10.229681141170218	23.6713201139751	14.12318099012946	14.510043398490502	14.862250023778293	19.017651239968924	19.322702723321378	15.154630337207587
6.9	8.875910780216952	8.805045272842552	21.732945342553037	15.514395308689584	9.875942077184456	22.296690889617977	13.866387652159254	14.013533534108694	13.772199911243492	17.190895945247302	17.98492799057562	14.875459194815255
6.91	8.614663311751666	7.836035791134384	18.821627525224365	17.910575521089644	10.530666334876416	24.1876664150257	14.326316197846213	14.776723064167903	13.702319067624764	15.382959339287245	15.747448919888365	13.000939518249659
6.92	8.140990271961138	10.667850064976877	20.90088197925695	16.35468845095576	12.903486213600736	24.405317140470373	15.162626505106664	15.469229704039616	14.806043447348358	18.541707344826026	16.09950995934843	12.657006652105387
6.93	9.562079617816208	8.707410449624224	19.817771713643047	17.74432904402589	12.234656203958247	22.858207584443907	14.669850541154963	14.055573586503161	15.932370795263319	16.837582033126665	17.885616949914102	14.129778201137563
6.94	10.683686317561644	7.336553598160277	21.217221238545374	16.289320532460042	13.210315289460906	22.015598457850448	15.029727676513998	13.119607361353143	18.71016997689504	15.93583554664564	18.41857914041959	14.578792113898258
6.95	10.389844078464783	8.470314794449903	22.076075869171643	16.250226094201913	11.3941986377635	20.4653211239872	12.923560559798728	13.94688857741712	16.418596202964906	16.16388197117256	18.560723532897253	15.919416809787945
6.96	9.572527643404444	8.633866634728351	19.791688832900658	17.56288730313759	11.873854117816528	22.744989991008627	11.763123322362285	10.80680697041864	17.225767034481446	17.472101168083416	17.880116324319005	14.67737487352751
6.97	9.721917731702106	8.122344002881196	20.21912135418404	18.20244891367106	11.70799089569378	22.107590073728222	10.969095012015055	13.47188836484634	18.861310659369423	17.005939543556035	18.491459083814682	18.88847741732571
6.98	10.180626875848844	6.620989434891365	22.114389225641414	17.105038580943205	12.963520960694298	21.160682778671127	11.294833892493669	14.32050850635439	18.197811903241245	18.794521039129876	16.319399634786414	16.278567658051923
6.99	10.545702358784549	8.813049915063901	19.657941053382597	16.348957300084884	8.77616748508997	19.916834218422927	12.014950239044335	13.731361987244311	18.800660767412566	15.781045810357607	17.552527746868485	15.33977078607756
7.0	9.02122178199057	9.544734470979868	19.709298939220044	17.56229785349519	10.792248361954018	20.689155631550403	14.372799678213509	11.840566205929203	17.47512711417927	14.240328126077365	17.405974784010986	15.103512640745798
7.01	10.878439828167176	8.94467569423328	18.977871820355936	16.948243846293487	9.60159079060683	21.80922047351658	14.099677701852645	13.10436059431896	18.02762553909009	13.84337641729533	17.327801714408928	13.50181622522909
7.0200000000000005	12.666502513290396	6.760468783932035	20.96365152698177	15.734773020146372	9.873051723841947	24.38877238030344	15.354989279067043	10.967911451861156	17.35373881831583	13.171201878476394	18.420900526535682	14.204199354359629
7.03	11.125890033320394	7.413643497711859	24.34498525471212	16.983623632898304	11.12532281794202	28.541487130462528	16.09053297093145	11.548804567456132	18.89997967095981	12.946130365285807	18.31763715981525	14.530897746304584
7.04	8.423941456645762	7.720484310368203	25.673740783784755	17.1941967446487	10.071871803820615	30.12129187748191	16.520820181235862	11.92916733834365	17.814428894969314	14.188881507957566	15.536812736418904	16.276365706830816
7.05	9.515930781909399	8.537976510519863	25.992657474661513	16.079019635807228	10.959614056445863	30.115546593972518	16.831828336904778	13.22521543250535	18.033018644827994	14.601564216426148	17.37379066132103	15.385095432139707
7.0600000000000005	11.022960281169006	7.935457921559393	25.213274486568128	14.184675329691462	10.88859522897546	27.33434451584227	18.585658500074537	14.225780831888304	17.292737362150195	13.402120525164213	19.617987518033534	14.23367320719335
7.07	11.77356993493404	9.044526648836865	24.178473722629874	15.317584693811487	8.972935232488817	26.900077214764003	16.479584719863798	12.566989868027495	15.01180508776699	14.575304019074089	19.056008088342523	14.102461645615465
7.08	11.96533875219281	8.933246869319944	24.984939220815352	14.335451192881276	8.57275008630078	27.452511592872362	15.815795440048865	14.31156984350074	13.840202154933547	14.544758267990273	17.808632343422175	13.667522721628925
7.09	11.975567069855147	9.353915781098666	22.08639526368787	14.953177609136768	10.826676823282083	27.07713347057244	17.680873890820475	14.237963664531469	18.43689715535231	14.065798717759408	17.762268045472723	15.634219799080151
7.1000000000000005	13.141968655673015	9.337023130794233	22.21885677205137	15.578002730165718	12.036216328503963	26.645042620575204	18.969940541564306	13.474098537092585	16.576805760987334	16.593426291326775	18.019451242241452	16.851693873755544
7.11	11.516350037326912	9.759216134804358	21.439221394934723	15.245150626373558	11.25641386791312	28.30448016531255	17.10085324621207	17.38878355111726	16.237653907632097	18.979768093035037	18.90905309329179	16.72878240754934
7.12	14.162970376726024	7.213189326194924	22.054913774031917	15.834266725122964	12.292434187461856	29.60356113217833	16.129850853253096	18.49111470249179	15.50961495727416	16.140767968753497	19.977516943327952	15.569224022763589
7.13	11.882036741766694	7.072024375330785	20.20153209218025	16.377489871371697	11.511019295693792	30.0863184977541	17.414729849101164	18.13408683027686	15.48990784416386	15.088567383896873	20.083543776297084	18.40592507556435
7.140000000000001	11.488708034099103	7.303085651475774	20.10829123937515	16.528269535957623	12.497345087448457	30.059688273235093	18.00096729258222	17.205380763817537	13.03134561218307	16.53363151177024	18.379954186427735	18.564710332128158
7.15	10.846216281107006	6.856756460443015	20.402595666369272	17.19092936149689	12.112544688030004	31.743725639049032	15.384517318093064	15.755007645552663	12.429092555132343	16.343216719778464	18.006332748349898	17.354972206630897
7.16	10.339410849834856	6.824395877715693	19.68789192711937	15.198329420136883	11.61754626896181	31.63566721491764	17.75352010963835	18.95134615400285	15.293682440913452	18.49116187303769	19.22921949367436	18.76127316668505
7.17	10.638298272232	4.213485377517659	21.549070582925797	18.753096842825336	13.47474688864919	30.876301521169697	16.295733802337395	17.481291533807635	13.163489096405268	19.79692058089041	18.52146907657249	20.027769582558562
7.18	12.50654370544481	2.545423790395765	21.083749346777118	18.606564431388094	13.00202662172582	29.420032156678083	17.517105598976197	16.808364830638183	15.776406765038681	18.189228770561904	18.33547802137451	19.681539124475595
7.19	9.921235234095557	1.4568708491153293	18.204307389838338	19.01631407223656	12.491069498543402	29.84017358508622	18.93777922401731	15.748647660413885	14.8972280756439	18.08379933539955	17.088265706896475	15.441488777860764
7.2	10.443205900393538	3.6449106398726636	18.78677145363594	20.111145731975498	12.401182706312266	30.44792691187128	18.583122630931594	13.764728851262353	13.97079256640583	17.173747432206557	18.55053563949789	16.65248230182357
7.21	9.986211640268065	3.6655332683621453	20.187635160564273	18.513094110984646	12.858790970351075	29.732264528110104	18.074901046008254	13.023617867473499	15.854113332859333	17.933012341536095	19.178761680599223	17.87296816374287
7.22	11.01139413184094	2.283403603235026	19.593937937774186	20.128259777725866	14.831782828775092	27.16880064238907	19.380711132393177	15.366751350036738	17.12388592608054	17.61655939111277	18.73653310562598	17.393638774752173
7.23	10.112281921414581	3.8780665046235008	21.30466331660694	24.30948533755312	13.908388167664567	28.24892464165493	21.538312815310114	16.013139677942092	16.54153601735843	16.811190807299525	18.842728746981187	16.86679179035002
7.24	10.583258807339417	5.9527425237068625	21.877230066620022	24.405755152729665	12.532672971183796	28.601480186656765	21.161656850988347	16.56996956865499	15.876476758173878	15.178731889985439	19.942649404768186	15.65649265205093
7.25	10.463182046078717	8.019609681462759	22.10123299447575	23.73327929305955	12.175231829707354	29.323891797957316	20.80044809005311	14.524313704173897	15.550459870003392	13.324602538405145	19.291054056376403	17.222552500536
7.26	11.928124524170451	6.013943977354493	22.457215653232097	22.83512561232437	12.061680713902827	26.254552333185522	22.39145238902883	14.390831254151905	16.3253826336277	15.442811179288416	19.334005659827618	18.185446651308986
7.2700000000000005	13.548270974217855	4.464686992767822	21.088455457349003	24.384699676105903	12.492330642358926	27.15845924818415	22.986787316277745	13.547677482556452	16.292464083540377	15.301390464230657	18.678939953317492	16.687794289306083
7.28	13.841529440138801	5.36801198540992	21.749309411318386	22.113204758910868	12.79547392301011	25.935288575045693	21.789092424674244	13.478319598329342	15.819857806237378	16.259655129917252	19.07137996887602	15.713846703272404
7.29	12.227877952284498	3.753475673530402	20.967879324103624	19.229156991596895	13.365993856721657	25.114144422994382	19.046649785393303	13.9733926140374	15.665881515320345	15.278509283260751	20.12685050492966	17.2210419056115
7.3	11.875108056942208	4.762460659908129	21.619107192408308	18.938175155974367	12.316442240983884	28.550375210679228	19.656482628303188	13.89371443367166	13.770781727049867	14.664986907788213	20.352367112368384	16.477615091402804
7.3100000000000005	11.395924280783351	4.044996089824509	21.14489388152488	18.04602049510628	14.37233621174595	28.824571015382286	17.84115792465458	12.84656777068681	14.877186659719642	15.631096194535782	19.31299056004514	15.01988151372562
7.32	14.684404299652797	3.742256856605959	19.40330142789126	19.755621344423215	13.442286975583395	28.058841421931888	16.05145053853464	11.29950413998355	15.999158604471829	18.011185580081328	20.66270159697369	14.878890173934609
7.33	14.542309657377855	5.221815234200905	18.086422010910276	19.065981405974764	15.532942765733962	25.485203059085155	17.397976305906163	11.084423223555365	15.932817947363727	18.493419394909264	20.968124247498192	13.485558062026954
7.34	13.224344280956341	5.624036934472047	15.60301810204427	16.172890294830175	14.648871602867622	23.55595488320807	18.33341021496808	10.903706223458013	17.46794182891265	18.454014476687984	20.584556334549955	16.329099371548686
7.3500000000000005	12.581825527177482	6.38378887899616	17.747628213843253	15.740602186493696	14.271418785526931	24.779659130287104	18.776144340592154	14.204823340111517	16.336506605389317	20.164928373405477	21.31652643882382	15.308171352105605
7.36	12.437804190149576	6.962350558052663	17.233249734261328	16.11917767261278	12.211491478782792	25.3144192440493	18.123614414085786	15.766881773178055	16.907771727055547	16.782844582245787	20.747446527978877	15.690559078825732
7.37	15.095785466847712	6.599641566216149	19.210091134971204	14.381143796472477	11.866234963429026	25.872271769211604	15.56923045208705	17.25452890967783	17.275829720808808	18.73194003502918	18.63958523874223	17.576692142821077
7.38	15.430159563852929	4.671685271048229	22.136589658911866	15.277142113821979	11.271018814965489	25.372603254140348	17.540375362573315	19.653724038971454	17.883781156721398	18.852590288468377	21.278767364786038	17.235154005264803
7.390000000000001	14.562941237073499	5.341873018527848	19.85035330692385	15.89169937621918	11.668984656941051	24.318586853534004	17.809344299830773	19.474862239094655	18.033003770190977	18.39853194709591	20.67452660951077	16.261719355450765
7.4	13.49777598224181	4.491066453270065	17.172450788386225	16.568511304113027	9.743477144451795	24.298729935028334	16.661638580626615	17.18258721689813	16.858734121960413	19.981069235340197	19.67307019024242	14.810307375532709
7.41	15.42374047203704	4.6319314555925635	17.624202526863343	16.06757323026107	10.164011499723127	24.623028574933528	19.32889704381818	17.077089375653443	18.032923351005152	18.951892684369763	20.105763750850063	13.941063486837335
7.42	14.948533284419643	6.445369163612617	18.860689336984155	15.440548516235621	11.223414078266154	25.700027496156007	20.089763614324482	17.240905019356433	17.772470371371533	17.504387401716706	18.488118225847668	14.407094288667466
7.43	15.36057619461652	6.716512834516995	20.66827520443277	17.669063379672288	12.751659487884035	26.009332198488167	20.200534524750182	18.7287941811477	18.5249209928093	17.692909520003035	20.928785962281314	12.648183095929836
7.44	13.615900139715514	7.90257149332465	21.75179363167395	18.363897623733315	10.910431563258063	23.978038336627975	17.958635190928018	17.77223259174928	19.572778739829936	17.850376935216435	19.40475159015168	12.280796035169612
7.45	12.255859104220745	6.2141757343272	22.02232558818336	18.818883971453705	11.143714949536033	24.376952729792198	17.195539046461384	18.433532046534395	17.63031038657901	16.03945977571889	22.692096886494497	12.058701796720326
7.46	13.1452157936612	7.057846336311621	20.99614560484354	19.945986326387747	8.89735789620863	24.24931078474315	19.946537373018018	20.601829363169742	16.618941169442362	17.962052285774973	22.004902982846126	12.2368726863632
7.47	14.265541217306106	9.597015969960907	21.18530787822324	20.62061851908256	9.691657584319223	23.432114020156316	18.498883282806034	20.217461105579634	14.715967556684392	16.99837605948674	20.012108021198582	10.588463515031798
7.48	15.259332344301885	8.549598345104446	20.48353722798608	22.90933436208324	10.29549141230431	22.47631704511642	17.527417800552968	21.483965356612874	16.697109606080975	17.50923589481423	19.348518891185407	10.374765993156018
7.49	13.687924042439326	6.185274437179901	20.230000547511644	20.771699489404252	10.090884770978379	22.38354840644558	16.571336162769605	21.127270928601032	14.770400770900546	19.982225992857387	21.610690092388854	12.274659447826464
7.5	13.338086471523102	6.217509849966182	21.187838172409016	20.670992472598204	11.022477011005051	24.235703558267183	16.738151978248464	22.004154904409916	15.276516915789758	19.333444446310494	20.257022447695313	10.85175597891273
7.51	12.261552202196597	4.249259992810047	20.266329231827758	18.56545258790283	10.779690614117444	22.7447382301063	16.130326144926123	19.942690070450364	15.95318667094224	17.333808654649193	20.711302379890846	12.418372080971231
7.5200000000000005	13.07330185763817	4.512080503995736	20.578929458762403	17.87222826838848	10.300150147428512	23.769086448710297	15.657038946428116	21.49164020401767	15.669230017748072	15.77698686674474	17.593207950216513	11.44902148984771
7.53	17.005350531617225	3.863653850577243	20.05857841929556	16.402059761020766	7.980437642950542	23.019485523872234	17.806007999217744	20.381056438601565	17.185549739107614	15.065415140808373	18.319584181136502	10.705874833201474
7.54	16.751731203157373	4.205755947270327	18.523649276140187	17.329593817173663	10.99997111925211	23.282690411246772	20.114957449313497	19.78923008351764	15.955311785345986	14.76888124280651	19.808283736008008	10.191396231255833
7.55	17.823818304918102	5.128774586825267	18.576059076330836	18.706758352785297	10.682292753796553	24.25049512436909	18.943548799154215	20.545213192458597	15.914177831375499	14.064531878080501	18.780959446160214	10.998542138137365
7.5600000000000005	17.668891131962496	4.617103743014316	17.838217637137618	18.97143669679701	10.85662200028964	25.15236724143549	19.658287542111317	19.79002809959267	16.23789614604098	16.71849695395695	16.084713888174655	12.35369231399023
7.57	14.76144068085203	5.030400158137492	18.39602612796718	20.674894396576313	11.739072297864306	26.19663219958535	19.941593871804805	18.030408339755155	15.299924532772492	15.7267212264764	16.734024716357325	9.968034486947975
7.58	12.555232982762956	6.8987267909566246	17.975597521587712	17.43543613812187	12.585696092702396	25.37541913412939	21.537220378365316	20.009905320442126	14.183056331046695	14.795166777587157	18.261768325756194	9.41850548347175
7.59	12.044043452512586	5.373160768521214	19.06510692230589	17.685947498008453	11.64188754014721	20.584683700737017	20.87446030305012	20.992607946519108	11.982227396883921	16.318557965502087	18.283054567441045	10.60171569170322
7.6000000000000005	12.29605171804545	4.599002757860471	17.452783975020427	18.967667595450617	12.453867301917793	22.956489121353027	17.323735940825593	18.047717095312787	12.394205710805402	16.457051072874584	17.511063937533088	12.188384209753972
7.61	10.710567692328837	4.714764881412651	18.832937186833416	19.249947749801997	11.587150450939344	23.24121229685863	16.455458607715364	16.522111428449666	13.40866688218965	18.974757929989753	17.698744678974244	12.758697823927113
7.62	10.55908933690426	5.643015726056348	21.452957983718928	20.116740913955038	9.844109824015769	24.233980647522948	16.22159131939397	15.891544945568645	12.44752269851623	18.032698719559598	18.620863311506266	11.524216724213089
7.63	11.270548532043934	5.046855585063614	17.032106519602188	19.604878298474972	9.351799250216786	24.65682792038996	18.974622595834525	18.140272902263213	13.144953322414718	18.32589036948382	18.56240465974225	12.412392921039324
7.640000000000001	9.749552141688941	5.633606475164448	17.88862712218747	18.083729678765227	9.296286600883729	20.25941392647948	18.330431241646863	18.947075000933157	13.595499717583898	17.603695629191666	19.218329049575523	9.88514458333587
7.65	10.012793445963885	5.0639234788836	18.108480921944356	19.82895376202343	12.66814769584432	22.661692556334263	19.82208912684553	18.85419190611484	13.784720513042947	18.640168638267784	18.633690250757816	10.84778038652695
7.66	9.637730788013984	3.6572758576722286	19.643266839530842	18.7610806338134	11.764442194592627	26.705028419000975	16.959063635591214	19.956111626204677	14.49248629340067	17.695776322995865	16.16514398618122	11.6110064008173
7.67	10.08297463094713	4.221078906615486	18.970165458418624	18.75798387425759	11.103809999727268	26.262680517473047	16.11119620868665	21.281545571575705	12.66314961600675	17.584771775875023	18.049872350140667	12.102521553649833
7.68	11.952774453212077	3.5505655032291115	18.382809329079794	17.945106963761038	12.153727886390543	28.116082070946874	17.124134201188603	18.641548432940944	13.048252244354277	17.288799140687818	17.985874872278593	11.159255509842012
7.69	13.427007846092451	4.360077111804478	19.11605519377065	18.915878075839597	9.334830379563071	30.667646748447122	17.817075016529575	16.02433729841392	12.991028947595122	14.99897698393305	18.059868202517965	11.168241853080028
7.7	12.53138721358957	5.28897034232677	19.792574844987662	17.684810360797215	9.941895983319174	28.98046067611116	16.408499383405896	15.10937662179696	14.917605097520424	15.686176689800927	18.589221796440377	11.231735918583324
7.71	11.767614571633429	6.27185676036036	18.929856600173235	17.107521928016684	8.640729854128908	29.414265671881857	13.750106006877587	15.10909730302864	17.76754909055292	15.11284808088989	18.29724152252337	12.323930548215285
7.72	14.919875215226003	7.58417856777616	19.871013514193795	18.977158134834962	11.84647874122497	28.86397306297236	12.046543830500728	14.689203479074932	15.81684377684746	16.147477612686224	17.4314580146547	12.715288090205453
7.73	13.754912780245371	6.500649394008297	20.785483029635923	20.145803536161324	10.718822977370266	27.257572756113024	12.907540589694454	15.966222419870606	15.436338444503528	16.950153555433175	18.40389671208227	12.270462844236508
7.74	12.024545817078474	4.909817817391566	20.314450273109077	17.39869232194465	10.55147527706082	26.193427739061246	13.019088915568775	15.79732864987836	15.616778713273488	15.96529132853715	15.717807643884251	11.813410858906087
7.75	11.107938097288104	4.668431723571449	20.05287910192971	19.105808759189387	13.0414643166627	27.659168636450953	12.076379041664113	17.009152085807777	17.22794264888326	18.708882298756038	15.344056339477653	11.69366628253242
7.76	11.819265364705538	5.812683283694229	18.921066595720543	18.98311722454819	10.742637629658727	27.231750666707324	10.321966465327884	16.070506370807447	14.635152430834037	18.859225848125764	13.904904719069085	13.32424668205611
7.7700000000000005	10.20863392394983	7.7496918019179475	18.641940816145468	19.212376239407398	11.365787444775062	26.478060705978898	11.81958702639797	14.279220430692531	15.031533997027877	17.256929052933653	14.979302635783194	13.871279220500117
7.78	12.464052403952639	7.6715584653105315	19.127330855853316	20.579579427200784	10.456800904028146	27.077317968561736	10.618903447574118	14.940864294824436	15.84981597013381	17.34358932083351	18.812646253917475	13.17905974553288
7.79	14.765876333524188	6.002241994018564	21.106809111338027	21.127725032266838	10.302024376659563	26.090127544600822	11.616121656774201	13.420042087012948	15.296076736896676	18.48769840950438	20.51445962888523	14.991772025906489
7.8	13.533383873798275	7.630406300599202	20.48954247605275	18.2014111121536	13.118813232488593	26.59761624054641	12.213538620507656	13.56396794018662	15.521392207782858	17.142593274233086	20.08202633013418	16.152737311863927
7.8100000000000005	11.271372689415903	6.5860515695367114	18.91546774823916	17.84848609422259	11.205787894732772	26.01839904532968	10.898144176168586	12.958829909492149	15.854800213298624	17.47620529873155	18.358043502941204	17.96538468140599
7.82	12.835102446721145	6.391218302488243	20.951608116768952	19.69713683717841	13.121993430678565	28.51489479224707	13.157606140174135	15.86557165754172	15.442971537635131	20.232697734224864	19.867417702019534	15.78924339965685
7.83	14.88599517467165	5.8197776690611605	21.17233418467897	18.631763915652982	12.182315042497743	28.068067638194364	12.122842621843095	16.61511074017213	16.55963492955309	20.34174455128476	21.225524987512944	15.841848888569496
7.84	11.251560450472855	7.662979552174893	19.97741237142891	19.878416558823755	12.649961857531178	24.477525148017406	10.415114593774568	16.603318748041495	16.048694336036952	21.49408272234559	22.148888964391116	17.21180145499563
7.8500000000000005	12.628739036211163	7.203104109557526	18.676888206752718	20.02801601047244	10.741387424827412	22.87193533322736	10.767025859806967	15.66544114873128	13.785851056139391	21.54469774698817	21.41359800666604	18.692483223162586
7.86	12.190637476699838	7.1202357731402275	19.140132205967063	19.903297369585143	8.833348321539376	23.136973780772347	10.576949351978715	17.330698148698684	14.147348201905498	23.618597513101943	21.614722093268302	19.23995197480329
7.87	12.44136066132094	7.93158356830956	20.874715767224398	21.056329582168015	12.244364449033924	23.368771805690216	13.270744189374845	18.565351631824957	15.295660099249515	21.81199353575076	22.017396875363374	19.6424819361335
7.88	14.83051931835939	7.3468399263981095	22.76704302251164	18.29621373610335	10.375815870747598	22.8938415189033	12.10502283664468	15.980808144318143	13.923108618413988	21.904231092606516	21.180456866509658	17.122355244936184
7.890000000000001	14.647388449692224	7.032267378527173	22.226135645399147	19.2333347925349	13.354036408886236	20.554182872860054	13.898390167098977	14.457481389990779	14.806645036769687	18.048895617788375	20.673013494469437	13.70750990420191
7.9	15.575460124665273	5.424553081970882	19.773426734294397	19.790000156175424	13.6901546563251	21.142624341720726	16.1621920349784	15.299804137391241	13.696038444477088	18.608649666835042	23.00269491043373	11.745779401368841
7.91	16.11145218254928	5.1669762552696925	18.408875235756977	21.653672717050515	14.708353494383443	20.967368014909322	16.047540550508078	15.16016295459665	16.056620788087507	16.67838388152689	21.491815283456663	13.55135119126513
7.92	13.554499005811762	3.8688888518836713	18.33995894335406	18.93287792835432	11.391605555144162	20.114455598317615	15.910844017331495	15.852015507561902	14.140382017236306	17.91436839387618	20.592267924121643	14.675299172360752
7.930000000000001	12.610174409962742	5.00322870392979	19.704551047724298	20.42558930066445	10.380730862254055	23.573237224088665	14.108561958792814	16.520417701682483	15.693005427529044	18.907397531670085	20.953117508373065	14.476339503288694
7.94	14.128888510069961	3.106314179995969	20.42752337466521	19.07552801060256	10.35130125488425	22.511643672150168	12.009325764741146	14.420308103675811	15.559741138942258	17.344178006781004	21.234690955823638	15.528637965121513
7.95	12.946276992255687	5.284811446122997	19.86768009645189	20.36035187154144	11.018924488200676	21.419686245810265	12.069625735572027	12.822892356563077	16.418410342155184	17.51053585319697	22.021609756946486	17.367043323211394
7.96	12.906906620950782	7.047821158686127	17.99632358866967	20.37247558544621	10.20668394732502	25.2153137514546	9.837296791978806	13.82830490736271	14.081995246443425	16.365173448598146	19.97386404732115	15.51744194448389
7.97	13.660326013028826	7.53899859310973	18.217411804969267	18.29380302850811	10.733088785543863	23.666698040906162	12.2210063573759	15.667811074437163	14.359443662984129	17.782560540167466	19.754531228857125	14.99541961679834
7.98	13.250836508419555	8.536864743164529	18.780345172048463	21.373343204561206	12.13283647512315	24.758531983085764	13.843669742254523	14.072135268034291	15.441051111432621	16.11387640866089	20.614463469247042	14.8499171636796
7.99	12.791324942819356	8.35237912728393	20.592728457043847	20.828891464022323	12.968688684028225	23.846719081832973	12.3742578863847	13.25556292567146	16.05712311670765	18.968432032922905	19.49884705049912	15.5314132849437
8.0	11.756396337232708	7.71058729007346	20.699593332257532	18.677829238228796	11.583235528422039	23.810372078053863	13.675754454605865	14.318820148176332	14.579288197256563	19.64897305512663	17.476758938625142	16.63329648744776
8.01	10.784213362432787	9.073095611319575	19.340929463780288	19.850683034364167	14.574870487175298	22.95891931552613	13.431783226689666	15.53077124666634	14.366264834795253	16.10450038056839	18.768200626910694	16.20565295396566
8.02	10.83872339233706	7.695961492829951	21.062576476951016	20.61800797442335	12.697148324309513	24.92833875731303	10.658151827751954	17.41499774033217	14.378223627657158	15.865435614197091	17.869739189058418	12.640611441067351
8.03	10.773607895974465	6.447259096466422	20.600880467895074	19.275595974795788	12.759561579802243	24.154040185085936	12.361907431981408	19.48391673377178	14.394238852841847	14.219488267519381	16.380381405038698	8.906976270688958
8.040000000000001	11.332057995599595	5.791630719211546	21.03583994835047	20.74371136511213	12.935858707516974	24.81281281096315	13.402728570127906	20.760857878403904	14.278630619596457	12.463866859450473	15.621917533936491	9.02782190588949
8.05	11.7966662578505	7.749135896937145	19.763653158577743	20.9367656464036	14.043737847404234	23.82962388559445	12.821300705826072	18.432765360684286	15.781077895423653	11.622779445904367	17.348149243706242	10.724738009143351
8.06	11.934061296420001	7.002061211426661	20.577954449217557	25.980904158163806	15.352233237521832	24.525879403929014	10.92909407281646	17.954356519029723	15.968471362764223	15.748770288085097	16.83686072723011	9.636644386938766
8.07	11.926674434732563	9.236168321708657	22.09852405744832	25.057462848983867	15.298647959267743	23.289184103071825	7.377886889065369	15.283448559539352	16.719006164630013	16.149914574779167	16.68018769709988	12.259619673087043
8.08	9.551798151218646	10.745984450731896	21.0600551176024	23.86347826928338	15.248103763052386	24.797430261917103	8.250370582700164	16.670146221432752	15.314540015317696	14.788613032272364	15.2413095408478	10.972865036136223
8.09	11.084662240957392	11.325860708064916	21.79110080638382	23.271281126109095	14.479889850550192	23.632429174500597	7.894484462772817	17.84026004670982	15.533995539053803	14.538600358707916	13.999927757342853	10.400208572182155
8.1	11.952363312155361	10.442017842245827	21.46903817557796	23.491192801751986	13.977627375482168	26.031539100096644	11.674878328365102	19.00934734814237	18.18801460042481	12.791300052476439	16.325270009071453	9.004227292188903
8.11	11.852744498489024	9.970323914491336	19.001023828110068	23.759750529594992	15.585378279799166	24.75359381210487	13.375249503089135	17.60778982378774	16.975510145200236	14.068054864892812	17.12486469350538	7.190579573675774
8.120000000000001	12.045919209032386	11.925708175172675	20.556204157691255	22.66010342759213	13.042904856082782	24.926955219501675	14.013570185695908	16.743728407927453	17.281187624968155	13.32617248552103	18.741607646839398	6.3096969024925835
8.13	11.390719046118463	9.703396877039857	22.484887597437393	22.552981644945312	12.056093027376088	24.12956840073385	12.876726053644479	15.345174210739012	16.642008015662107	12.252554149820217	18.33797738002256	4.938199467902021
8.14	12.578558998970442	10.18670435866617	22.01667422564536	22.657809010149638	11.632048499491356	24.691266483743476	12.876537243755427	16.44139335658691	16.777996093563356	13.35483765600939	19.871867501367554	5.936104580756591
8.15	12.127859961597386	10.238642691560756	21.27452170383801	22.110519943655117	12.630848787784787	26.357252626626718	13.136313313203	16.220960668450388	16.88361471575272	12.519721319057295	19.545152652682802	5.542687498700099
8.16	11.227998216407393	8.32058827457923	21.18529715941096	21.296504208527075	13.135048964730226	26.500783040058188	13.284343778068882	14.974813399401471	15.47183467945976	13.64466362378802	21.665757551639633	3.410363138462912
8.17	12.87956166881876	9.220034858495865	24.05548405636052	23.591456727743058	14.682204614884842	27.272114043097137	11.41999692570737	16.69928861636707	13.051830964149046	13.863713690100138	19.4025305758159	5.470242901263626
8.18	12.141030817390101	9.194449834259713	22.397620185017292	24.58092869526242	14.164693918533306	25.782177043368787	12.131893787383794	16.047307134700564	14.94210475310228	15.196950080275206	18.604658976992894	6.0740635901457285
8.19	10.007151959966174	9.325360986572925	23.64062040853676	24.738506738765107	15.256631884928215	25.388417409023024	14.859221454814238	15.429526250226886	13.267119108407808	16.981655744573473	18.83054343299884	4.814730018369687
8.2	10.559346153853653	8.094962935802252	23.016173862158013	26.166144807180466	14.771193562141605	26.284432539654055	16.315448875832743	15.699544998619052	11.213080677033481	17.777828722767808	18.501938741153687	5.490079657828322
8.21	11.695457625724522	9.210880435067027	23.047608090068163	26.46821361207892	16.16324910597138	26.21232855184473	15.480329314538386	15.234873092306163	13.524240243091144	18.753257533104627	17.22919452552193	8.878571032973838
8.22	12.49801591092146	9.148618612988004	22.544625247040422	24.75494469134572	13.803862873782325	28.943839775957567	14.361724784800316	16.33795277524154	13.825541237074411	18.062271424981994	17.911487532991192	6.144632498045941
8.23	10.992899348168391	9.189750363973035	21.20513057446382	23.42210081956287	14.0546417874311	29.12355089104242	14.41772854771398	13.353699453301655	12.672615306180713	20.13846992298454	16.746939237094708	9.728913321613335
8.24	12.890924203664948	8.822276683764528	19.864582815491577	25.278651111191394	15.407987886163255	28.367124573314435	13.03266478391926	13.982265085770727	14.806002699741514	17.891725796478617	19.055176354301796	8.816231506788862
8.25	11.154685095514198	10.538200911379768	19.59541154770656	26.753706235170252	16.741991220055436	26.8042726588919	14.416381397137572	14.723809054470816	14.720521134267129	15.891839952048631	19.227020804294213	9.396143932578731
8.26	11.282367682817847	8.62423717177483	21.447294144851274	26.245084735535077	14.031300174324164	26.838677243383973	15.384032442261557	15.799119594988126	13.5256947170475	17.03385192507313	20.106521357889854	9.68850093867257
8.27	11.834176158373232	8.8562973952441	20.210364989841338	25.26720222796824	14.15978919877838	25.1542466922152	13.246780650545848	17.151117238779353	12.306038646555661	14.841188765246319	19.34288161907866	9.553315761773886
8.28	10.844932104174998	7.322032727126206	19.651265372245142	25.765975915387735	14.663484842821099	25.287470192598054	13.178496228290669	16.528176375075518	11.151645753771176	17.227360450913682	20.22116592834507	10.441481283299938
8.290000000000001	10.733932093451847	6.7661021592818145	20.049718301571765	26.17634218260899	16.18691812421645	27.519928741159447	12.755305930358585	13.989832223817986	11.343445768040484	17.936810454478653	17.90020866866557	12.496468905876979
8.3	11.38941686387311	6.819252464866342	22.242109697766253	28.236798951520846	15.755860077700481	28.800996832565712	12.622978079682166	14.521202591752486	11.108607560700625	17.698394833006667	17.78405437274026	10.787910055036027
8.31	10.239579210280892	7.970797043087284	21.400696272095935	26.421213192869246	13.24556853832856	29.37619031522677	13.696507180196376	16.73474125997363	10.821990638505667	20.36373572065742	19.253759686402997	10.998645651463047
8.32	9.211549604952616	7.6045434217994545	21.49587764251289	28.490107829045442	14.042779245828923	29.551205387486945	11.35309904248854	17.710189950978755	10.529015630502728	22.410721746490445	19.723666531316425	9.905192482696558
8.33	9.42432985494546	6.344462435492077	21.77593070131668	25.323728266827317	14.767114181742077	31.38869384370824	9.778484200846517	19.85585691519258	10.62149194270488	22.33573548739727	19.984965888269812	12.84015423672709
8.34	11.079826989977018	5.693448460538266	19.848350865001184	23.994943238861133	16.881694836527277	28.528540676790854	9.222486460966001	18.804228384189294	11.854684297022889	21.51612674377954	18.43530376284302	13.474933712676334
8.35	9.50856279914743	6.154023815004398	21.03450395700676	23.689931867348083	17.42542836616231	28.308563424460928	10.916020483787042	21.16222883123353	11.304578585105688	23.977128342218784	18.353917414183545	13.713813609217862
8.36	11.764697274874557	7.218109928645172	21.66174534214249	24.90543365763148	17.266662991008864	29.732411295049683	12.508468221270599	18.594967625394343	9.31296658291005	22.62658849527744	16.680639165135332	11.058456672703814
8.370000000000001	12.846286781071734	5.494496030758987	22.306120066878808	23.73406609034844	17.08462548601201	28.943863651725387	10.633327144326621	18.138296380262055	10.26018571751282	23.87959635987484	18.220894798303583	13.766765702783403
8.38	12.115608582231435	7.289303764803107	22.45125059977775	24.84117758838264	16.322860894978145	30.08708649558349	10.303270793396774	15.832284511089947	10.92138557364916	23.165027457745005	17.65177625080086	10.919941265348767
8.39	13.000566419387281	7.730490810337287	22.370450060187768	24.572576363492075	18.203442694854633	29.61929132359739	12.375095699538988	13.755365752144536	8.647342298497952	21.680762820572912	19.71918536675806	12.113598892522322
8.4	12.62714944600305	6.608872367467436	24.872282301286496	23.95244567835759	15.80458874501373	30.51416208476391	9.753398479131098	13.94680286356484	9.891598077079431	23.252530009115908	20.50377268486456	10.560046073090218
8.41	9.335148603465312	6.9930656652280305	23.80970497669509	23.69752344441952	16.276792715002802	28.245333024885557	10.338702951001215	14.352568062600103	9.228944267603492	22.780485005595338	18.616977854597458	8.59777662209018
8.42	9.509715452402427	6.4179049886874875	23.547789783744467	22.891040996385083	14.248637053785309	25.98085014329085	12.421075098015965	15.947144913692934	8.635436739899442	22.381622119602024	17.36704114921919	11.740875669957585
8.43	10.623591358840237	6.331198983714784	23.34726933417168	22.43691572923069	15.07454000033762	29.355304286239672	7.9186501189845115	14.171363291864532	9.146037883483698	20.33755868404127	18.07808442656202	11.133411807638343
8.44	10.407256622651113	6.71364375755525	20.998928448017505	20.053459381182254	16.77227300433011	28.91625761036367	10.001795064669752	14.961577809961613	10.213976492271078	19.859120157664933	18.00681774479925	11.694809562034594
8.45	10.639397225555971	5.631206938338275	23.324937352531233	20.185125587904977	13.864472932503073	30.32625782903894	9.264861606898217	15.640595645520193	10.520060704193257	24.00472511898824	17.54391252779036	13.930017907818165
8.46	12.641896500127624	3.114756718499902	23.771330818827348	20.197322313249177	13.389378572379282	30.407275699758802	9.94259235899646	14.322469483750208	10.763482502451394	22.571191018579135	16.970713597633324	13.004802707368658
8.47	11.461682094001496	5.221783405336112	23.914896571008928	19.37302660072657	13.802958526555862	30.087948736316584	11.513330225707747	15.150287849256786	11.583349536610658	21.705202822163933	16.276036810195812	12.131686694466277
8.48	11.668097435071726	4.672910087303583	24.978098407735427	23.802108942183345	14.354874746904265	31.548747560710492	11.538958347462518	16.53351508905613	9.926253358887069	22.976080602605673	17.25961397685649	14.646413536345298
8.49	11.173949934552326	1.1204776660219735	24.05152532663495	21.694721582025643	14.479960785978536	29.98255462493891	10.031496736074978	14.709947444881067	9.778365079284542	19.92849576761609	18.056624492630167	14.279708377668134
8.5	9.92038220085918	1.9753448210586029	23.506159638325464	22.25573903247728	14.331930833738118	27.56857048381579	10.666741000635882	17.007325100304648	11.544867128966326	19.84162706334478	16.79959104155692	14.71534301542616
8.51	9.584054431467917	2.878888367010862	24.36289076887897	23.87418186545255	15.294957700357642	29.17670469048142	10.90799010500907	14.509711423098079	11.64417484264272	20.24699069448968	14.089771578386351	15.24717611896967
8.52	11.879524523274082	3.798741081384733	22.76429535800094	22.063755548780566	17.119090552501504	29.93282678428547	8.878870916583177	16.522142611613745	11.904922344207229	19.940165540608696	11.649990553276425	14.807234445092858
8.53	11.023771081702765	1.921834140434619	23.753632605922938	22.967642246558707	15.379793674827786	29.20098942187053	7.691082030039637	17.562343647558293	12.792267319918391	20.22825556292595	11.700301500770573	14.726579395823926
8.540000000000001	10.20644805519941	2.4030925329588264	22.667772847967235	23.331252261103916	15.040799932559672	29.457336569384807	11.134030262825405	16.319136052944067	13.504090229353164	19.76125288195648	12.794138500570233	12.858513520876437
8.55	11.804595242641755	2.4807768596025177	23.03434031721027	23.721160036700308	14.087345601003737	30.13854698251611	9.955243046767322	18.159119580181635	11.562826641291844	20.19986239820959	14.295645479056622	11.22557082775777
8.56	11.15507170503581	2.173078328553502	21.519779105867862	21.824674857362133	15.866116977803149	29.04714011719268	8.73199604263416	15.825199201606118	11.608056005468745	17.585824330090663	17.66695913373751	11.943706016545123
8.57	10.469673172126514	1.2978060214751876	20.806861587585885	22.832129772420657	14.401607472534831	28.59697084256168	8.104560947190922	14.481784576217875	10.654527774999364	19.01823378859199	17.586376340305435	11.262496138124481
8.58	10.106450094364133	2.5333812426687516	22.182728322182346	21.30796054758718	11.97740932783198	31.44144754028616	8.524432610317715	16.40280447979568	10.679773624918502	21.5995002255804	17.655670164440004	11.904264882676312
8.59	10.674875792090692	3.2636247218925223	22.08314659596475	21.11990839353462	16.31312523796071	32.55746783808244	9.726789863392431	14.08935846865277	9.930664972434476	20.291910817541144	18.631969350967896	13.227447002161135
8.6	10.267258497955096	2.6913117199934202	25.065159167713922	20.25911422149952	15.387055300566844	31.63716444019995	8.51535172869649	16.058340295631847	10.76743128578072	23.629451513006973	18.8264925839364	14.281750934377389
8.61	11.269526251858533	4.012750750120369	22.716787261428152	20.80956334500611	16.62911711174437	30.341687089914032	6.9657300019985655	15.524788836539264	9.992226254590904	25.70676353085971	18.140418202361303	15.098352574987024
8.620000000000001	11.973095836157464	4.356849776495652	22.372649214471885	20.080107608054355	16.57533325204567	30.40636201606431	5.0470590510239175	16.18709180462841	9.733779457451668	24.147202334567496	19.234367674151613	15.041682952753318
8.63	13.470827677478212	2.7353316005829282	20.228974187276705	17.998800959651298	14.488561141149116	29.641942160238617	8.902340116697541	13.944726960722402	9.139660983401871	23.6078275243625	18.62857502652638	14.725324831258076
8.64	14.975812067381474	0.29206779065362604	24.123182588056693	18.98728614779793	15.673472024868744	31.054378614771963	8.30119945617676	15.439206675735642	7.446524906276705	23.62026437894143	16.828677347384495	13.758209352521746
8.65	15.770456783849976	1.7274169125449867	21.670517863223083	17.88562220385607	15.009472078448638	29.8170789654259	8.435480902091143	15.399076723951744	6.990546196269367	21.765821379307425	18.759156374648324	9.940749874126901
8.66	13.517368190525843	2.7881996128541826	22.30310432347212	18.06686049217047	16.637756069151166	31.403202495935254	7.5222700750581195	16.472711782468505	6.713440136722146	21.592300817108733	19.477051863114973	9.201483588957753
8.67	15.908131201067006	2.8985322825890756	22.567977941720873	19.670464673894937	18.958883751969548	31.09799410212967	8.704227577406623	15.969585169557055	7.017126304745124	23.107218395469076	19.74019226552694	10.07516282468423
8.68	15.757072649227737	3.119078093802393	21.35294933306913	19.184192258855866	17.221070615381166	31.453692209742012	8.478120298950667	15.7230503747303	9.580830068165815	20.611309835232742	19.38972608825307	13.23522062736364
8.69	16.532590110208634	3.472253600517619	21.807103502165045	18.221173200244827	16.707799106119353	28.29547870852761	7.309836123836204	17.94117918582636	10.103729234562039	21.075019505548713	19.610935569128436	13.63392448768464
8.700000000000001	16.896197101515533	4.520418693465242	22.31061482260583	18.359784297087764	17.65216923299395	26.029228864746155	7.742202380552708	18.20955151424599	10.671196114016997	22.464155571102268	19.275178008718342	12.293723798387875
8.71	17.59152039540021	7.928380737182433	23.421673638161657	18.800497777642114	15.36077540032422	26.449844566417045	6.3674658178545185	18.45129746947326	9.203940992309473	21.146307095755514	18.488524399691553	12.060633776676491
8.72	15.78610265374703	8.020752136747221	22.911417772405205	20.053026930913447	14.522481820818944	24.56172412914476	6.820806799674787	18.037432653767684	10.856656641145786	21.271933859011714	14.702613008762151	11.902052553862134
8.73	14.290587062655286	7.613161017599671	22.85512748361818	20.20447418017344	13.773741387491945	25.751911358798875	7.286118788805172	17.05088303214749	11.040244316376281	20.89261667083362	17.641540792687458	11.959997712725732
8.74	13.140285242100449	9.33569306075465	21.80820939088418	18.895373148715684	14.461718003549652	26.176338870264182	6.657647149416124	16.687774411391374	11.265347328494594	19.90330313546655	16.392661215923653	11.666611706307432
8.75	14.6272686264328	8.458019224825861	22.583770566207786	18.840542255855436	13.182743695474018	25.53533445815498	5.039202048139091	18.318774003536596	11.482295709106612	22.83864816790631	15.838629726371941	10.816764305578136
8.76	13.91216949707291	6.256637949085336	24.915294364901946	21.103392110600797	12.374400028252039	26.518952668533455	4.7009041939610015	18.63220400121205	11.996704864384903	23.898602028546307	15.214066324961554	12.62870352959285
8.77	14.446404128234946	5.7562704740110355	21.372491025430474	21.160993386100877	12.633443098396281	27.43212972027484	5.965299748773741	18.16668333815476	12.536506745204054	23.340526934032283	14.106012593637812	12.343037145280993
8.78	13.9483459877321	7.308589602368029	21.282803782400233	21.690648515965467	13.494657508021273	25.315421205154024	6.778003318017745	17.413472106414975	14.468207079846113	20.49711086479901	14.15360536517746	13.566625948269325
8.790000000000001	11.6051199811703	6.832885117118729	19.751657592529828	19.742700673860924	13.649911777045407	25.141989520152205	5.208771206928689	19.837548039773697	11.296975299176315	21.8627111616665	13.925834615293073	14.372024827300466
8.8	11.357672482802839	7.071185096168336	21.11611437177182	20.529491941809074	14.014187683831487	24.144937108395293	4.968967557444625	20.566540821266837	13.83019870295797	22.541097542439054	15.605904989976285	14.744013479022758
8.81	13.12753296679841	5.579308492951779	18.39303357953141	19.980405830366326	13.57478168415862	26.53772512995584	6.962415603276636	20.721556445489313	14.688479672344801	27.47309174962721	15.781925235938854	13.560740361252401
8.82	14.32962290195431	4.907123583474761	18.363773216555625	21.58062147593103	15.202604223070871	25.10500441293339	6.186558355918142	19.72330020313775	14.40441991127013	25.894001860771745	15.003447535281078	12.56551670747245
8.83	15.264721291171341	4.635450330299537	19.2581192356435	20.273276003060428	14.734729811898047	25.21353606339579	7.1596430085824085	21.702886596375315	13.900023035548381	24.561628190775025	14.997586367723782	11.14809915560561
8.84	13.471748584579803	4.960028638440145	19.084094287947593	20.864275061389588	16.256410051876536	25.100861165519216	9.726032865790877	20.960446583512038	11.802863119374575	24.895881674891548	14.787590068929324	11.960501894288075
8.85	11.52954021399807	3.5062660210430328	21.400954343697506	18.04073551975364	14.811076204406334	24.29073577501964	10.802853599778702	20.85772300307113	10.827202963708894	23.244818607480244	15.487175136386616	12.360935691005402
8.86	11.555401679164959	3.4628044168165104	19.204340262755117	17.982796800785056	16.50320725728238	24.842080039275178	11.821369248437641	19.935096428628974	12.862066675215182	21.946032896903475	12.980080053377298	11.587717724962516
8.870000000000001	10.466361687266359	1.5696008752131883	18.45339342181733	20.19634015252033	16.851530043981423	25.601511554669543	10.916809674675207	19.164471830068546	11.520113649948296	22.814096967046876	14.890651595059648	11.001968368552474
8.88	10.898428585724167	1.7538754214469159	17.17457107050833	20.740659437589244	15.949700811505696	25.625405931605723	9.13811264793556	17.615558772554905	12.287081453854602	22.838620591620046	15.10282225317263	10.087114516682682
8.89	10.494084435305085	2.9822576157820193	15.41836305831278	20.440550812828498	15.450730791232187	25.564035192258384	8.471126118677313	17.33327602733908	11.188169781925005	23.067899739085107	16.55786762713144	9.528884762488108
8.9	12.454918442153627	3.8672169456951493	18.500870998516795	19.953789698892223	16.142731549790653	25.717227756101764	10.082320600399068	18.069448153885308	10.673358192704049	23.959046679953737	14.247610375482688	9.256186874718223
8.91	12.880186208344568	5.249324042841438	17.655441564756202	18.52124619602212	18.297223160099442	26.32627004040815	8.635605064052802	17.419268585579097	10.702930767265087	23.261605229456215	16.389053186682215	9.10533101468179
8.92	12.921334374445228	3.1926696162571746	20.289357959588727	20.592056757171058	17.94260507125227	23.353718718641037	8.699505814432904	19.794510014339362	9.380890361100287	22.16039643212491	16.146661062468397	9.462989763458147
8.93	11.282440712419206	3.04555754173701	22.601776221400748	22.082602850601635	17.287704757549236	24.322814414804558	9.488991637600531	20.770577861115065	10.233366601409017	24.90497210435961	15.79470626968901	8.240495502167494
8.94	10.873483292983899	3.8632323544146985	21.3782114656356	20.571020296807248	17.62315277729079	24.476992861266993	10.784117586206417	21.314695832907628	13.314374673752784	27.074986891603313	16.425841293569615	8.175836033237537
8.950000000000001	11.540560642748286	4.8938133771591845	19.531999647359953	19.31671388551224	16.906917567242385	24.43833091175154	11.947776001113576	20.88248165231609	14.504970615055429	27.764500446558216	18.15042232907916	10.744904109214447
8.96	10.6692577406	2.72047436606141	22.26683584973933	19.698415089422173	18.31012949804039	25.10023218591701	12.159297459197532	21.095009063290423	13.307186706179325	28.412737296871864	15.122959286105651	10.419449732552291
8.97	13.491008812694963	1.9056521464688239	22.039539977765845	23.222560800558288	16.42934852317221	25.300280243615276	12.15979022680373	20.684662480643517	10.550243398697173	29.00654764972702	14.8958306144273	11.375166409021672
8.98	12.558783653247968	2.7748858080392886	20.435083582923426	22.999057683663324	14.587336481359143	26.664412828435715	12.53602231274254	22.29898711951314	12.311623303736933	27.88214659411233	16.556669114336984	9.482457116430126
8.99	13.606596176641597	4.137995540215246	22.973384693196664	23.279996329883016	15.228910229417298	24.05802700252555	11.778755483001161	22.060521075308397	11.43297826177082	28.444963120661644	17.366853740099447	9.706157439586782
9.0	11.987226438025258	4.05742624726225	22.063794385222543	23.55126497259194	14.71780471369821	23.10807081754043	11.73011280189179	24.04683697113682	10.60408840380288	27.714264682195928	18.642025166243947	10.369020484813234
9.01	12.730994145723422	3.7570449919681743	20.812800385818477	24.433889817553034	14.786926308519405	24.171344513080175	14.08300322932198	25.766038273611997	10.237591381970105	28.09349273891345	18.745881204785224	11.230297649055665
9.02	12.651896683779091	3.727187442342361	22.398838749837203	25.10241570934837	16.188182850805994	23.60413833958548	15.556865769001108	23.808108470139977	11.599249102113179	27.273788828601138	18.014809412036485	13.779424380672731
9.03	12.962936972761328	3.4489588779672697	18.804038532676422	23.27930074136342	13.510214357203914	25.539485742613167	16.111822865528854	24.319435460103417	11.169970930883927	26.76303200248743	20.33176190597175	12.997722187444039
9.040000000000001	14.016449304812411	3.7315713780135424	20.75296642083824	23.86217372531023	12.197850882538711	24.661904734245187	14.023143374355904	22.208947733120564	11.478131180297956	27.557876893568338	19.835114955020014	11.586618388079279
9.05	14.103237383188565	4.172035865303457	21.683929536383186	22.571925452695503	13.911885714918983	22.9509623518167	13.222425956237593	20.529308820957286	13.246601579502219	26.57794948208297	19.558791237177992	9.715612933570272
9.06	10.212885083939778	1.790706874803363	20.24249099899318	23.01768609620406	13.106314350560858	22.583587059234315	12.90896138648065	17.39360087376204	15.478132442663927	27.831769160679304	19.961030034766786	11.030529581472315
9.07	11.467113571828348	3.647039048913228	20.958671860583486	23.878947204375187	13.140986702444566	24.791775796249603	13.033408900872809	19.944052502181584	14.256859659170829	29.096871221373505	19.846540096937265	9.61730723704404
9.08	11.971991955993095	1.9664120500487563	18.866844434089465	26.6224483850772	14.386678442270135	25.710549986012154	12.882832114060543	19.282989650435646	12.522785061879423	28.760305046238805	17.40681406449691	9.66827652802411
9.09	14.719472352021292	1.897702896658346	18.271622559648826	25.825142637198685	14.152172130941434	23.267268657396535	11.407787134035956	19.865822558237028	11.720801125083847	30.704721176688448	16.785059045646097	10.825898087985877
9.1	13.973662050973127	3.3366341245762388	19.027622914979677	26.94306539961304	14.00331562323495	23.83949026915559	11.861827581644082	19.720190010895422	13.504835818579028	30.667102024626555	18.95374964378517	10.586070094469056
9.11	14.31925867296686	4.746306028597748	18.237776285608664	26.02048038917968	15.872130995360461	24.75966901935645	9.78055096772454	18.88547706109612	11.156816032105162	30.573881286938864	20.939415767853315	13.022434777657024
9.120000000000001	13.889763781764477	4.259316584801662	19.591822124806317	22.839327371475292	15.877611968428061	24.781761969581733	11.644275495022626	19.36424079915753	13.638582034029683	32.951157710209905	19.1385548600279	11.97755989278395
9.13	15.594524157310602	6.203823499973826	18.482300000465198	24.52201804427888	15.83755244223562	25.886239099414926	12.286572932979807	17.026480620625332	15.305312847450352	32.0931926986086	16.230511109428864	12.425501851775858
9.14	15.179608666206239	2.8166445344018185	17.937629590824052	24.523232953248367	15.427863321549554	27.563438565879395	11.731144317362991	15.812132312828288	16.522502347006316	30.189602811055263	16.360362907757747	11.255537215611161
9.15	15.44436929771401	5.92038615278467	20.267631889208992	24.609673597557816	13.994251459092666	27.18301903047783	13.035485963591418	16.011581738963923	15.03670989916609	30.93860864355042	17.09635410586601	9.478354027004396
9.16	17.880760145725855	5.5733957200664745	18.281875562454506	25.29172755401232	15.925020543303596	27.296922867737702	14.32483231063041	18.741223628543047	14.636621551530798	30.726539675895076	16.285154252339108	9.644063874695672
9.17	15.227443099482233	4.259309732875615	19.564355296276005	26.24274502224825	18.836694747375986	27.08536524227386	13.642738561813621	17.22275003690795	14.775031202463744	29.308909202062715	15.44377621001285	10.290230864981016
9.18	16.07021392729188	5.1463831458644105	20.91704867100101	24.11961215022947	16.081337539059138	27.338508047122765	12.2092733559224	17.763490539807588	14.48018816354944	29.58574481276645	17.351991140053872	10.854680383101481
9.19	15.185501682960494	7.053890413967423	20.386248733268708	23.026384589718866	15.837839115248766	24.631510885297075	12.682527482036026	19.11091034318672	15.391178912723035	31.258497198369803	17.66630342293881	9.595288814711141
9.200000000000001	14.836157255248956	6.071135259274303	18.638057906743906	23.028684036647576	16.772269912245253	27.156399375382453	13.409771674623165	17.03030115018185	14.71091745491683	32.11961429338127	16.46211615906538	9.65737181859232
9.21	15.657081508059445	6.525301983588041	19.857128203789042	22.00608223577009	16.30324022280883	28.573783300470982	13.435585436849935	20.619942495964963	14.039736882871278	31.879788257677895	16.923361655918438	8.511918005804167
9.22	14.95863971464633	7.242010371413895	18.3809542377326	22.587749153331348	16.83053334739081	27.846816164146098	13.699608164396283	21.88053285882586	13.325085484343727	30.860684139615717	16.453784014958106	8.690765925160113
9.23	14.930035115364905	7.328766273955005	19.552343396195905	24.274772041225823	15.711513358254189	28.620042134550886	11.71351273973953	22.180158942698764	10.620266178038385	29.947436222837183	15.759482783897848	8.059180722525024
9.24	14.238935322420541	5.382249126283217	21.01212883373654	25.02877453959784	17.382408475450998	26.386958543558986	6.993689498503207	25.05162492289423	11.801695933640946	28.515446304018543	18.519640353360764	8.442745933656568
9.25	14.004981861758717	8.388905832028103	22.80319979022035	23.062612222295378	16.949051731397507	26.52601363844161	6.727214308849109	25.22926353585395	12.822943708270842	27.476440743478904	17.336430898291702	8.37726761247198
9.26	15.184001929131442	9.52646386441158	20.325714538676564	24.370609357151398	16.0757098031236	25.334179467296007	8.204811351802805	23.1130595396092	11.400410318893375	28.09402761736299	18.07545737200227	7.616688754377428
9.27	14.157732152065822	5.906205108359578	19.998157474793164	23.299119031000025	18.009918816583937	26.24513190400211	7.9745672680867035	24.922624969650368	9.690397571490491	26.925640013630975	17.135312418743084	6.681396509107672
9.28	13.729901719410357	5.790295646140309	18.908743394317348	24.130481149145467	19.166964122033416	24.477370908388984	6.063129490623947	24.397148475260828	10.417718034312188	26.363445662263537	13.831056723310011	7.389213017824721
9.290000000000001	13.751465232260689	9.299278102834087	17.757592692008846	23.11716316095023	15.8774505943293	22.85389960724896	5.241980249510889	23.430175794346106	8.373856540027369	24.954975568975698	12.576855809225234	6.587999470178453
9.3	13.676927095092584	8.275070270648044	20.009030722442898	19.956725030602783	17.886368692545418	23.945852117217303	6.877658776155747	22.85756652583171	9.026509890326988	25.80619526572867	13.1468741520803	8.054937683917565
9.31	14.932193555180362	7.938333576889165	18.51249782688937	20.303731042382903	20.194391020079962	24.806917351614374	4.732331252191903	22.583755431753897	11.16955204788108	27.02831865386971	13.389229961204371	7.8472997665615685
9.32	14.661923152613078	8.728814619618158	18.175856683973432	19.290818444115438	17.271882985319973	25.12258591346709	6.660104804405563	22.623234731597933	10.741560581408944	26.12931503212741	14.78527448670745	6.937387425563057
9.33	14.794413873760876	7.171209364928002	18.18666092626412	21.491798233461445	20.13055532546925	26.199825100162432	8.888849926659441	23.628293760999487	12.403096169984606	27.380097482339423	15.280094966902004	5.985109309855509
9.34	15.242516109273922	6.43976317372684	17.05194306661272	19.888378236255093	17.303154526789108	26.1813773086694	7.209682906416407	22.403233018819165	11.762742778310502	29.224899252121283	14.65932251427917	8.034353300037095
9.35	15.6831957659624	9.020440037183398	18.13240071335442	22.49159447433358	17.73143992018923	26.36297951090957	7.824505342256852	23.00699352985336	12.96520849457544	28.885334459106236	14.197225520587248	7.91450155100081
9.36	18.456037623794824	9.66076519883969	18.373222390048888	23.93553076019811	16.44662297903783	23.899084502268085	7.997847443680827	22.74510883968012	13.250379967681193	26.09733068810195	16.250676500889274	8.226657871295684
9.370000000000001	14.993144797871881	7.99292874016075	18.375628350451844	23.54655932863393	16.27820124101486	22.490063301409403	8.246199443606532	17.88911397520034	15.62578030540372	24.892655117916572	17.46568213375121	10.014500836271532
9.38	13.551980554279947	6.860591257422361	18.889079277839585	22.03765967271323	16.192041951775387	21.338540394074524	7.397472074924464	19.265434491776986	14.34023902009029	25.889336874536717	18.08044919151637	9.679518967973525
9.39	11.567025395145835	6.172542696164479	16.55503544585383	24.485574786018113	18.174988329644066	21.415861649963063	6.477082864074408	18.904984516021297	13.876453236956282	24.327870666163058	19.469376770188536	7.872133591701636
9.4	10.57891877592994	4.136323238248942	18.59702016571424	23.49545828642996	18.0976845209746	22.191964020999077	6.383195458281297	19.589399209793207	15.376424232335431	22.947046110227877	18.913745580179224	10.233429525049207
9.41	11.464768408070517	6.218811283920084	18.72623617324604	24.335791754419525	17.61217995701653	22.676605840822408	7.907458837754325	19.25923178613689	14.804386879579926	24.895246651209682	18.28461688099972	9.06188674579235
9.42	12.276951881846962	5.507358338689922	17.186030445073335	21.821192644535415	15.473993322408438	22.360312359979794	8.574338465465932	18.669218519697093	16.44540282734439	26.004098532848108	19.255265708220296	9.11528065463474
9.43	10.442353201531695	5.139500844758482	18.409196266100295	23.068616804130443	15.642834467302247	20.049509308592082	8.182725754371692	19.825487735548908	16.486461592148093	28.504870126960455	19.846672630559066	11.870813068792211
9.44	11.85100120578942	4.9764925993369475	17.320860787969533	23.994097720154635	17.23087885262317	18.754298363447592	4.9471187457727375	19.21014976036115	15.837945233705302	27.919677845590552	18.74319469676342	13.123777769670664
9.450000000000001	12.673636999661973	6.514088494101965	18.720642189917275	23.349165664341793	16.157700594810557	19.578569909671742	4.07477234332578	17.168115730242086	13.894950828937978	27.51012226880389	21.51500979534924	11.648025482028997
9.46	10.891175201038772	5.5388022020922065	19.661088473550347	23.770827261937914	18.07992112045522	20.724700953385742	6.134522905295763	18.25747159737287	14.82886933563283	27.294377451562674	19.716436144272006	11.944978908142541
9.47	11.094555741819764	5.8995025153260165	18.75531138893274	23.483099552104367	16.937338216737718	21.46821295871619	7.108298692637014	19.825145915093103	15.170084627159723	25.889725829110954	20.896735986499042	12.471720438098643
9.48	11.692777632962692	10.230149264695608	19.623930284295618	22.349862372527163	16.564169561187136	21.32073178296235	5.78044386120951	18.88812865240434	15.256238131986247	26.725776468819234	20.33726377954818	11.750368243656924
9.49	14.177219168130982	9.335409391790783	18.751904596298562	20.900331855177143	17.27599483490881	19.112744860449386	5.535982520234274	19.96501877538317	15.298716435240838	24.90079327354305	21.144185552208988	12.54369821098146
9.5	13.06214360861115	9.188510180972909	17.80932238661273	19.02639944229771	17.85839070742855	20.18301197787382	6.776443342407494	18.309162576648326	13.206298182099042	27.884399694560184	22.42037595306801	14.709525552539485
9.51	12.22783914975565	8.069846428092497	17.470684131133268	20.246354448357376	18.327765035454124	19.15924885134706	8.294332815489911	21.475696476420268	14.025550642365307	27.488023216565228	21.944236606149108	15.253161448268145
9.52	10.36886950326804	8.074286016112115	16.457563656906906	21.004199702795134	16.784930273889078	19.609383878129428	10.800231225944005	21.001893705791407	14.728230188123707	28.265657616627724	21.525399092190682	14.812428087145992
9.53	11.404778141507602	8.750091306044272	16.52568510352394	23.15082099779613	17.4158355121581	22.5442350055275	8.858409762807414	22.171436542593376	14.20324209897525	24.495034547084977	19.653809828761926	13.680508105132278
9.540000000000001	12.587527700405742	10.132453699602276	17.13271587666172	24.07053575261232	15.761382992264329	23.595362867001448	7.812173062574413	23.59100327573219	16.300454462694415	24.89476312361532	23.136938274724095	14.215970454847287
9.55	11.031963512264902	6.247213565495423	18.206976083496407	20.490319451276587	15.825783777153132	23.549995726101077	6.398413496747515	22.935063867695998	17.68997735696488	25.81219131008097	24.076951294606747	15.623698053351266
9.56	11.711784120733714	7.4830621883730215	19.340765082699896	20.703252479004963	16.929416471929454	22.253534394405552	7.248226968841735	23.321192814889468	18.367078861146492	26.313446706311204	24.860704659593292	15.460013791687272
9.57	11.882216012124935	9.1273168290595	18.135051215875098	21.0767785001782	15.589790232755638	23.39238331037998	7.475642497569152	22.317957635947188	17.145808584973707	25.737934084572903	25.290854810560578	15.273607542017064
9.58	12.41308266219425	9.392644721595937	17.16759483758339	23.641400185014763	14.61223392558849	22.083085008917113	6.995972351069395	24.872618491077326	14.728487280164893	27.00552322666318	21.583436968468572	13.091938661499324
9.59	12.754870559697157	8.99851679368434	18.55427848679999	23.557327842862172	15.343323535676564	22.196777215052638	8.267989866750446	25.22727628625761	15.458989986950881	25.907188972000288	21.45420617802677	12.43074637793265
9.6	11.439366132305548	8.827326977736668	20.775093576003137	21.924474895813624	14.744041011296654	24.71010881020398	6.925495219228958	24.42454128243244	17.40183924990425	24.896725728008533	22.04116315825305	12.893562009499563
9.61	12.013925119884544	9.383357626674371	20.969361193036836	22.19987641921486	13.489267857718625	23.7521924328297	7.7243896792613524	27.034958123259607	15.292695833795994	25.106901683292755	20.754228623685314	13.229302801166405
9.620000000000001	10.244723626781905	6.975116847657791	20.630216890002853	20.243509408895207	12.835460414296188	25.062393852206526	10.742159236788615	24.789342923539657	15.71453884730704	25.800194966913438	22.236902741720986	12.466777342578915
9.63	10.423733227510514	6.384789406094077	20.76398054486114	21.700912747678753	12.041685589924546	24.616456733236216	10.1936223885211	22.727800431301127	15.989318770700296	26.071158330848647	22.308280756669365	11.506262303600188
9.64	11.308125616236358	6.558953178078309	18.689321277698518	24.111698297990593	12.94745322052478	25.217425455559617	11.597404041148065	20.84428113654149	17.76851770422279	23.790284205618256	21.79225667815274	13.595198652330987
9.65	12.158457831732846	9.153898320043572	17.53139923730766	21.874321313833313	11.671218634615645	24.80267412530315	11.417520622293543	21.28238595536482	16.799033480485825	20.738719253376576	22.794006656598587	12.89842645543062
9.66	10.736992444647091	8.609259422712702	17.520439544054295	21.292545331506194	9.343251481912532	25.343440336270838	10.500798539533909	21.77582254662126	16.846038010393663	21.95189422060868	20.634604496901098	12.160035442255962
9.67	11.22073197069972	8.366068719115038	17.95637516309955	18.972479693090577	13.323907592914042	22.685543320048414	9.650783706146166	23.531576567525676	16.369980467956033	22.483112255852895	21.66770699749806	14.833445877040994
9.68	11.678854157192916	6.842056478143456	19.285571737638655	18.907346484973118	11.72598973181696	20.50556938580428	8.831124154737912	23.52902111799675	15.80002997907647	22.0392337800182	21.334481327175872	15.172781832549079
9.69	11.135819130278652	6.147073216611099	20.79732328281769	19.061876617210675	14.41471086012894	19.309782146687134	9.0300106942589	22.40601639272917	14.52784128174721	22.48410474833643	20.65357704230939	13.535862340576836
9.700000000000001	8.132587183086587	7.0905374974207485	21.34245493509419	19.09942313968592	13.754119906368304	20.262080917616544	9.400369834026026	20.690193107349828	13.462517641153724	23.464636990600237	20.911137003877005	12.792811462804792
9.71	9.651593402677555	7.44770246655333	21.721427469269592	17.69747962918612	14.821964159335442	20.93452823679726	9.247162584457264	20.609473989149123	11.782494925558073	24.998996189932992	20.362608737172344	10.27557403807406
9.72	9.822803594808306	10.655110479017662	21.67165390173211	18.358127567954263	13.212791202871525	21.969755443640405	10.97947882619339	21.53313105120701	10.800162183885616	26.84660398371489	19.991979520900532	11.745271906658116
9.73	9.393433994353348	9.96976167634834	18.340711639252778	17.552343710063184	13.017740565662674	22.957787277184334	11.259299073383529	19.449054006680495	11.931409686219437	24.968853075037817	20.16725146297077	11.346123110366484
9.74	11.141691686584823	10.194489484384825	17.94429724413887	19.209065524625014	11.213818750613404	25.318818149696448	8.276098286661833	20.3941752412087	11.167744669351645	25.816785999035556	20.555380108079863	7.706510505693993
9.75	11.639640872110254	8.665637321042436	16.576640136028892	21.945522697991677	11.853055649400101	24.67314055134574	9.308987499455567	21.42236463095401	12.063887508719755	26.629126203351085	18.72505174597216	8.536463550933313
9.76	10.489043593295692	9.175879730920995	16.62343658836151	22.427512999811526	13.726957645886724	25.139233328878134	10.031018380707588	20.02077539164783	11.675994155120105	27.861571397551412	17.534419447305392	9.232358177553666
9.77	11.311765210462957	7.770794717071215	17.79872885513622	20.70971422115628	13.411085504116082	24.506659561209496	10.936996042557587	19.656869497344143	10.867965688970225	27.33002779248024	20.024092496012646	11.358923432767423
9.78	13.327879943391629	6.850382748385738	21.276395078497618	20.95987899511404	13.162128243046872	26.519261858792834	12.164408732398293	20.00796167771372	10.781774120682522	26.919741917952575	19.78672934453365	12.148285155967125
9.790000000000001	11.524089964162593	6.50183031927245	20.569849669340606	22.724618410318904	14.544582638194127	25.992827652000997	10.152825924544686	22.872330183641186	10.170520747239124	25.731016979883925	17.601708703362693	10.08275213236373
9.8	10.959154380490904	6.769948221827448	20.387000376436962	21.975044297831356	15.108722450555765	22.834207485896744	10.57791571063252	20.73445787831897	9.362799022031432	24.15381335539427	18.95547423608687	11.50761914680677
9.81	9.669147041354712	7.526747379333734	22.641507437277212	21.56572069505052	15.543421773223237	22.263475941533734	13.219236180103712	20.14636443321776	12.332143795629268	25.194602216116834	19.625900145735034	9.812060704008639
9.82	10.192328636780031	8.624142544585284	22.266238123426668	23.597562943798014	16.02859876503433	22.961156781335543	10.108842545966004	20.776574094280406	9.691945607876294	25.944289248989843	20.065463484142484	10.832866058867083
9.83	8.935243691445656	8.9183736295823	21.424933786524424	25.213014341487433	16.432628264567366	22.870851567990705	11.922505556607849	20.436880076673138	10.177362227822048	26.168000000612242	22.397003047463038	11.416099695725672
9.84	8.986170638000019	6.825755516013307	23.19306149851031	24.494840968188647	15.851855933717808	24.326045898486836	11.672741247116575	22.592264354273446	11.98125358219617	24.687500261705612	21.63343055789806	11.633057246471902
9.85	6.726287006336538	7.034977602807954	23.10633700553298	25.563276433751486	15.919612484413243	24.185898407347445	11.456321610810061	21.693424532238513	13.145016211994365	23.060171057225496	21.819206653755867	14.475880641502497
9.86	6.461777854474849	6.912801113055935	22.008081166141025	25.859980342110397	16.4054743420138	23.991417548929547	12.477638237333588	21.47163069367924	13.489344781778069	25.806542280936394	22.95456099366121	12.521842700662463
9.870000000000001	7.026792487223942	7.870769293579903	20.2370346148288	24.741840207411865	16.13763849520327	24.353530367762026	12.226101337299585	24.622856518906453	11.772119333842646	25.583685021415626	21.89785397581278	14.850756937773452
9.88	8.836560636442796	7.718506138999319	20.33490701058574	24.823865608932913	18.0677095292399	25.073323500753077	11.441189280673823	23.27612368765666	9.488045303767096	26.30088092308783	19.922839051281983	13.672003390553435
9.89	7.794287926502824	7.778217493762687	22.000700899527903	24.332086514161468	17.05988775454927	26.283447509110363	12.278841562809282	24.05756369907796	10.849965987142276	27.44148260453042	22.5642639273972	12.81572908576102
9.9	9.114410605288526	7.351245987220933	22.461552248662183	25.7260227332665	19.35402822322006	23.326754885240447	10.881415805500568	25.01665144988357	9.139801350082282	26.538983540545757	20.106921262409404	11.97166303918514
9.91	6.989817366131707	8.744528371673434	21.750526589672717	25.754780046803987	16.88866348665293	22.714886141581204	11.951613335952583	24.528670555316133	10.796019072042546	27.663249902080043	19.513924597218338	12.344108944836483
9.92	7.739764709841449	8.64777357578859	22.553661944650553	26.75801634263084	17.873505988009956	23.77105733952395	10.380111351010907	24.487434525963174	11.05942005282098	28.099354880917932	19.49276627453386	11.402430939876576
9.93	10.513443782362652	6.828849849742987	21.75300025561193	26.66296745683422	17.433881704871556	23.249507637888787	11.807480334472478	24.447193507792083	11.970883616985283	27.693950076612406	21.18489892862634	11.17519778071613
9.94	9.16169071253556	4.90823091092573	22.33847562917174	25.40912459213764	16.246032298373304	23.535210203236467	10.833508586768568	24.93331633815556	11.847541635220562	28.318012564126956	19.83765546894351	11.530484600210205
9.950000000000001	7.5318133116505726	6.099485462907883	21.31105169320337	24.4350063474785	14.514638611825408	22.526807982606535	9.247450492630362	23.89809860951554	10.818156049989195	27.64724955176023	20.177443024382953	11.184287079623772
9.96	8.341025390302496	7.917515893572182	19.37959335377096	25.83830141846988	15.695439474441521	24.333278842584846	10.67493812488201	22.299217950650952	6.803519595714277	28.034318152808417	20.14163650814977	11.22074930295116
9.97	7.5913876082263165	8.7540112514461	20.334169093227512	26.34267577919201	15.39336667671349	23.696815263430953	12.00127996975156	19.15844138649608	8.786522577986695	30.066150038290658	22.93389132157041	10.572662777885373
9.98	8.070735486726631	8.023386167168235	17.19737884267658	26.398792740063886	14.67386263233818	24.057628494394837	11.402303716121855	18.253862897960957	10.20702852453422	27.33718325957389	22.85115185847456	11.308368074394703
9.99	9.296061102394361	6.714155394301059	18.56307641619962	20.718464783140075	15.925003829263005	24.286661015403585	12.9217562254266	19.45236844105734	10.044706951256755	26.893792156673126	24.51117899820453	12.70405655275517
10.0	9.324020708592565	7.399100335364323	21.051019267898734	22.62214023788707	15.250986014154735	24.816933690559498	13.495416886182426	18.746991788687208	11.021395599761137	27.950504507135772	23.248064238811182	13.159701976021095
10.01	8.470804321312116	5.05504878417144	20.60547977227732	22.423368787129263	15.00494664051696	26.383278201754468	11.335662841608372	20.498152808127085	13.22073111348035	27.795198808345432	23.021470974908937	14.681609387207416
10.02	11.509710366707603	7.8198888929394	18.99308849333794	21.81108645925204	15.83134686065894	25.51956638263733	13.183042053053299	18.077191026882513	12.324060930753216	27.10472347841043	24.399189705676562	14.107380004778623
10.03	11.316243524459562	7.84975418587025	17.743634879105006	24.489107199770316	13.137146194495786	22.967159497790345	11.704495293817319	18.715543987202423	10.157879344878793	26.41259295312513	22.956530450742978	16.509848042226956
10.040000000000001	9.140735878143776	4.8806906854430325	19.623410130845343	23.72224342342575	12.697918780560913	25.516504050796073	11.848144994042151	19.829718572944603	10.427069989165881	26.66876565884239	22.5605203793328	12.736571416417183
10.05	7.2410516211409925	5.138358720308379	17.76490737504497	23.031071148749238	12.75287959652469	28.299102114552745	10.639699917227789	21.83954945741869	11.113520663209798	26.356717947899725	22.017046204858573	12.177958278948422
10.06	10.130004121394219	6.38373678243384	17.194159465836105	23.546319164218303	13.98786031048174	26.980134515730285	8.410970512729028	22.750165914097234	11.39459047786315	26.81185944732958	22.51964614297719	10.432985742343785
10.07	10.528521502893337	6.813899137015418	18.18382853901663	25.37133252086734	14.527324964699181	26.411666699824774	8.9204004721419	23.231003613089857	12.386518076788635	24.881571416993996	22.016173821887406	11.72721719544331
10.08	9.868989922722784	6.573568126562379	18.3143303751574	25.972718057217996	14.562196821653037	27.753985618519636	8.06758297441233	24.44736334478612	12.64086500100993	26.21135902242785	22.28697003607855	10.942115737798645
10.09	11.37891749569125	5.963414089985166	18.689160910430278	25.04652465420198	15.966965600847107	24.94278371760504	7.595945558838425	23.949719783807684	11.261638548164996	26.43882486872839	21.10663496393182	11.306920126140248
10.1	12.515860827161193	5.98661760172072	18.333464002315	24.97879917492097	16.44387499568457	24.289748301467743	8.934932001116152	22.929470563305486	10.819376825390865	24.536014237376705	21.292208659793232	12.62906363252454
10.11	13.287218678720453	7.0394007519669195	18.42868119891532	24.725658767471206	16.58182354895534	23.1105722536965	10.302075973898408	25.34370582444356	12.616956833902423	23.133271634467253	20.416423593670018	14.532449211549988
10.120000000000001	10.73164286387503	8.361489712305826	19.37552283731787	25.0290083337155	16.725781416937874	22.114855963635748	9.297540000009397	26.197232416257574	12.854998801452886	23.35355284035153	21.272482583509852	13.449741476601442
10.13	9.70598040346754	9.310005530509862	19.660176545956293	23.32330600050389	15.638046978509792	22.650417648276676	9.908338401812193	26.98780639020274	12.377407422050538	26.286851598666793	21.017792369759263	14.03353979514605
10.14	11.585657688359372	8.161689442233126	18.739042942762115	24.830338378838203	16.49274590166681	22.457235817663758	12.080414090916967	28.3485138339986	13.45043547840024	26.974798105934365	19.714661449037404	13.064069754063862
10.15	13.645573051264162	6.168920068446584	19.739505274591885	25.437528441567785	16.517346266719166	24.388875053929965	13.865883793319972	26.24274947020405	13.295206587005481	30.54114082530012	20.747098829117203	15.204587820300258
10.16	12.793699431490928	6.160937835224353	19.19156441766466	24.809777559932584	16.718567488408578	23.89748595670957	14.564621054654722	25.295463600330855	12.813343801439741	27.042379875202908	20.200295736262586	13.08551777798944
10.17	11.858114755865028	8.576506507918895	18.38828643099685	23.39066930133937	17.64885085995631	23.959469075992825	14.028247996867048	24.713716604375225	12.089257263817238	27.850245742310964	18.369324507214845	10.690251982454933
10.18	13.085740351997659	9.03260667562418	19.91820337074766	24.697448933929053	15.005354847102941	22.050233679858394	12.82483190439174	24.662518944705692	13.68376273357872	27.32115030394068	17.49551924883228	12.029554489927847
10.19	10.02177360797472	6.771464147622955	17.42501608657852	25.94647127843945	13.860915639576874	21.042261469152272	12.671079928410858	23.58803107436305	13.011980747341838	25.360126108095834	18.701768893683198	13.261522169401772
10.200000000000001	11.567491798670481	8.11933313986086	19.50217624721568	24.59731541323333	11.939587671564324	23.0289267327384	14.336406921308235	25.42477620707907	13.781218754946	25.705370664965297	17.350688279513207	11.123666361177953
10.21	13.002317537365123	9.062079982875536	17.755140947846037	21.17467900024227	14.43369287003773	24.110573026287476	14.516683977200167	24.17873776698382	12.556232488236219	24.083809043699496	19.25239293124309	11.447302388646772
10.22	13.873034358613532	9.03086525212413	17.302620356548093	20.24500059972339	12.887398068148691	25.183762452530914	14.899405890322818	21.72596720225315	11.778888972600512	24.529490745099416	18.75572000541618	11.737301635045513
10.23	12.109163613308072	7.037978247907745	18.47253728666345	25.034094951443954	15.156339217445781	25.41886832109252	13.749176429578043	19.7814848222632	15.162005101039025	23.789746081370215	17.6188636057185	11.777534253180086
10.24	10.072848298921642	7.173546719308662	16.83326247772624	26.204305200674145	15.901224102305909	23.495695679368065	14.080776213490768	21.792971766026042	13.327071914960651	25.975891357252607	19.01923372779884	11.50971446095836
10.25	9.039818998353603	5.09146521120713	18.487122165526934	23.71902236591671	16.837892539174284	25.516995949821567	13.798950469536393	21.400082848539668	13.790803780454057	25.82605999904031	21.015875883704098	13.584136288085096
10.26	10.695409598470931	6.660955512112391	19.191347577557107	22.931799484293073	15.992121833405015	27.415927997203152	14.716436384645906	20.93931072116053	16.070859410116395	25.139693021832823	20.502894307950555	13.892613854096636
10.27	6.836340395459937	6.284998867380916	19.08783153532259	21.628851156879982	13.44823073008226	26.567545427307326	12.341802222194099	21.779383366390785	12.37248220956907	24.395761226787418	21.066178272902906	12.99351045163512
10.28	8.905614258005635	8.006659883722174	20.812665593991447	21.598012155117416	13.06698213298878	26.131233236574396	11.652613617656542	21.258559982592015	13.213544676484087	24.192644282421764	20.648676173032182	13.125645287429007
10.290000000000001	7.674267850935125	7.2899787221564685	21.484888484561807	19.8842992325242	14.969678312940461	28.21183296560866	10.83696021018676	19.88072486993524	10.804139366547552	22.902042571487026	21.7344164366193	12.128888904150543
10.3	7.100240075292023	4.509241848830447	21.272922886401496	20.002418936304387	13.285828635345254	26.968950895806717	8.671010660293037	18.893121608043298	11.194041457361577	22.382863859797215	21.407042657397472	12.435467636105239
10.31	8.253045429944196	4.201970705527033	22.79814122925665	19.775724269803973	14.034302033056882	26.258340286280863	8.15430917765971	20.016363672322576	10.864757115543307	23.41434310889263	24.112448587186798	13.349212262112927
10.32	9.021993819016243	2.892405773282412	20.339578219720806	20.580234908517888	14.817158837905229	26.289770502055784	8.255958370213422	19.834695115267373	11.646750322898658	26.021292015710436	21.645016178125008	12.96295505197468
10.33	9.198008953047726	1.9418831474254896	20.49871227821819	22.007819897159386	15.533077199308453	23.903405595602518	9.305626591600289	19.00404669001275	12.334656475390076	26.310568697647533	19.92636703660187	12.942858048719817
10.34	11.566203817460162	1.8286704540245748	19.77383272872609	22.931719719203794	13.719668231053602	24.482284987401282	11.345256968397395	20.29641613438502	13.399619731563375	25.044843405595415	20.00664983586894	15.949019903203205
10.35	10.317686937538905	3.2548796023513273	20.158988115119314	20.981563683152903	13.280286478354938	27.134196027678005	10.774884166553964	18.43396962838312	15.184791643227527	25.22412888983632	18.15083938768607	16.256338399509257
10.36	9.715476238087167	7.1969307596091765	18.651134677375286	18.84853766374611	15.630785521253197	24.756545155312843	10.25880244717989	20.460000700556137	15.585598804884954	27.25448395812315	18.80703268511015	16.055294325182697
10.370000000000001	11.326660023895117	6.926808639218259	18.382365017110605	17.15240072069456	13.342966453636402	24.7591684986133	10.104662023301184	20.4367979164696	15.803985792687445	26.84192364286644	18.943162004588597	16.54497677436022
10.38	9.290185393642718	7.41640271415935	20.59511082312824	17.706841506391434	13.043007534612267	24.147821207389093	12.111998468791723	20.393957062911824	15.469675232034296	29.032455476410142	18.63354526485722	18.386801655841648
10.39	9.532249051918065	5.687977254827296	20.213328205098527	17.030362802344236	13.41675209068734	23.221473672530337	12.036319127826705	21.469078325396698	15.875234940025495	28.692086397765628	18.73006978596621	15.706933632483889
10.4	10.573682777964427	6.3182116293854	21.069872984686306	17.518313582033795	14.050858853828796	24.03674277422154	11.411839159353256	22.03832559853348	15.782882041524912	29.68167086062683	17.55951618402325	15.234257189260568
10.41	11.248832448885741	6.268306034278411	20.613994230194503	18.91616599909899	13.011635264105696	22.992893087471877	9.180124939601873	20.299282099441886	14.295642175914976	31.328886577255275	20.2289747878331	16.605137589135158
10.42	11.46093460933764	7.546126233196024	18.742496353876064	18.607082955093787	14.358439854925155	23.335364138032336	7.754618924577865	21.051751333657915	13.693293863167947	30.49946107724249	22.321206821230017	17.463260504923227
10.43	11.59473207528831	6.0574949591860845	18.903207270642906	21.397849793062452	14.318431491220071	23.41155439138108	6.582917421283678	19.89563988508818	15.144108554145118	30.690162782932862	21.03823922823685	17.446800689999137
10.44	8.543384936876532	7.151986228002193	18.911956317591784	20.05180511999804	13.960184722597724	23.700171585942737	8.89250939363309	19.787804507337643	14.760393895762533	31.707659310072707	21.717646572704485	18.866958635417177
10.450000000000001	8.895630108154714	6.302572635257669	17.36228912681375	19.9284938441643	12.108357301134477	24.32677318728319	10.861809353245926	19.866021303470237	16.965075771176526	30.126915753689673	17.840554229577474	17.080979484757425
10.46	7.185949674092726	9.810648264206145	15.869257298077656	18.02672297997341	13.384165587778929	26.06922215795117	10.486298438498087	20.534580380138067	15.142114394514422	29.809671951131982	18.234470031561678	17.67612526837914
10.47	9.270600100298685	8.118547366709196	16.727966568165265	18.415859325065767	13.64951768310534	23.084879430218702	10.08208851358447	22.65759341616841	14.49398346089986	29.805845040902366	17.966302211591724	17.583339340410834
10.48	9.603737168784848	8.591363260093853	15.860012940023017	17.647889261712084	13.96103069725656	21.252249693665586	9.811818689129035	19.33195711257868	14.332861910264398	31.3292561295433	16.760893541096387	16.426040841920983
10.49	8.164649906348286	6.345672749971724	16.752293232572953	19.7878946101519	15.563673733615088	22.176734823065193	9.364739114296162	21.24655740748169	14.165066653397604	31.092356469864708	17.02285611508198	15.795316701575237
10.5	9.607627214871519	7.906472135089163	16.43689470872015	17.49419605020272	15.329834682453297	23.14528645939767	10.717823288414863	20.459525511341372	14.98218493798225	31.398723055825446	18.074927115829766	14.650719316428921
10.51	8.721160567364795	6.489801215762191	17.784587146404935	20.24848987375408	15.769314395117435	24.943348449203842	11.91629291247929	20.323329256101466	17.023319983086914	29.952509486603713	16.870724940996727	16.046444221677906
10.52	9.583458144051438	6.17305989956156	18.361268383429966	20.850013628286934	15.76627871817518	25.1903784333347	10.715119566645917	20.65015493606514	15.680056719490862	30.235776240560227	18.22252610497598	13.501360848326895
10.53	11.551143258249917	5.207669665824944	18.540438728154566	18.77858297848644	16.754564613846437	26.13804867825576	10.502258924965975	19.439125026318237	17.982810663053726	30.84381770491351	18.870423724510683	12.356699346340363
10.540000000000001	10.7739220919071	5.787417887780326	18.050537787239648	19.426358605985826	18.929512130750037	27.243190223740516	11.219050566951472	20.40857203548055	15.08323741346497	30.50957689203165	19.003209246440544	13.573301735584648
10.55	11.991261326933289	6.347758292253701	18.015701221956412	19.4684132668062	16.206448636724133	27.829414269639628	11.335740970312989	21.33323976448464	18.000409925597815	28.76888141366496	19.05738719237708	15.265010166479465
10.56	10.910813140647674	8.060174914419813	18.29681181544656	19.134378611417453	18.412138386542534	25.78122578040291	10.358420854419082	20.259145014466235	16.365475266453007	26.16662241131088	18.271414869143676	14.240942690306658
10.57	8.154444202998826	10.117208595081578	18.711632369675797	19.05126580965196	17.32090859607616	26.1981800813575	10.539493580712763	17.912376354065238	16.801248902830228	28.124128876819523	19.60513022229323	13.346770758871562
10.58	11.752868529874856	8.541983970288804	19.712732233597634	18.645189348579965	16.4740525233908	25.421187149111837	10.305288618758501	19.29035794236407	15.08526871001613	27.52821468525113	20.989923600550448	13.500280707302329
10.59	11.784839837513738	8.059312705988374	20.661361509723008	18.80643869596033	13.952998640814824	26.018741002913604	9.937608163667432	19.397239470743287	15.667849996542005	27.359299980181138	21.948773273104536	13.07481179143176
10.6	9.397363185110782	8.119492282931464	16.556731564616626	21.202793625151433	13.972477296290457	24.77245030689126	8.663070652473529	19.11965909467512	13.143831350062325	25.106249034627975	19.312149375964054	12.748993096369547
10.61	11.387662742813461	9.351654341611557	16.137308787514016	20.79310715686678	12.128553188725814	24.93506411507246	9.090374793785168	21.274244862303167	13.054220289918275	26.534787861786615	20.167118180449556	14.848329574629972
10.620000000000001	11.668734552375547	9.014755942008339	17.537274394200807	20.71727247945053	12.18879053900965	25.818657983463442	8.904739870933803	21.678638148765824	12.737642588327278	26.744415230526364	18.31487509944929	13.772474366534112
10.63	13.184191118713825	7.223686496885723	14.866687453583024	21.49500939334839	11.936521068501941	25.936638757393055	9.267200563659168	21.621008343639534	13.700040645453436	26.247189822563012	17.740433348938215	13.003193559523213
10.64	13.152891696735582	7.3901652509396385	14.445232097816493	20.74558918905975	14.351386901489034	24.947247956499762	7.4392506440088075	22.18658549939785	12.270747548167321	25.876646886948024	17.84585461236516	14.528292084467452
10.65	12.630221503615422	8.719177732224093	15.997445664334373	20.73206604649488	12.60302846090462	24.64936510539387	11.231242480616684	20.837511142988596	11.855911377405187	25.726277312219644	19.32579014786547	12.63989890697288
10.66	14.721451555711047	9.038262146419616	18.441998043202375	20.568727433262666	13.09434873410482	25.906266042040773	7.137789967084187	20.726339790497452	12.153466335093528	24.98100887703673	23.734930370047355	13.578667025133827
10.67	12.967869932203005	8.730108504914286	17.603702258799807	18.287197873508365	14.324594043382454	24.84197212733082	9.553027783916065	19.70720058824184	12.751503853800786	25.810585999618993	22.212911029459413	13.057532413754455
10.68	12.493999986849692	9.53427651126448	17.508063862953563	18.03651995146842	12.970395972635156	27.4111753949479	9.118292473907681	18.549415868544877	11.73226002012964	28.09261424322557	19.370206324931818	13.93797278144683
10.69	13.180809194729752	7.53533764184517	18.196157780167777	16.32425078967229	14.357940262780605	27.770881490092968	7.353490159418656	18.32586391272588	14.179502229261628	28.091249167913112	21.44824432137938	15.667731420942413
10.700000000000001	13.610651577912313	5.890354919827213	18.014879456145028	17.05655930277034	13.513245075955911	27.511333794561004	8.953407366836542	20.858700641408475	13.601863925814344	27.102839688075807	17.701423819401924	13.806136049520251
10.71	11.981867613956032	6.097824284310821	18.242728230975196	16.275899967385488	12.699513860751056	25.30466386980236	11.195029490856669	21.37234020987695	12.585231868780578	25.691785287065617	18.058940842863166	12.724243063006055
10.72	12.171035617704286	4.536095819780263	19.508632068202385	18.35394417289194	11.861056932285956	24.907055538933754	11.029069494549589	21.4385327816689	12.114631466814282	25.079581806919474	18.541330822103717	11.875469846665686
10.73	12.211779885912197	5.128992905250978	22.076710529785256	18.31535236568063	12.36300812338157	25.380056873326023	11.663885155398578	22.635754229119367	15.710860612310759	25.091887140807028	18.29367415362377	10.085204908347144
10.74	12.48514281875857	5.470086200218008	23.25023235689146	17.787643139005763	12.40893285394066	25.00897283788524	13.279267216107923	22.87193019224458	13.955057113938919	25.493191889070275	19.32616840902319	11.642554076736264
10.75	12.57611790655851	4.958690312390063	21.57410800414813	19.128198066002092	12.401500463351773	26.47374880449911	14.108526164380613	21.747194158852185	13.547945405775888	26.57917459180249	19.19453236186395	11.982318441971236
10.76	12.47232830922557	4.893625271394593	21.31598241413052	19.73703768439357	11.51174593769948	28.120450780748374	12.25299030961413	20.61785506046869	14.502218699751536	26.618109625338363	20.537458108516677	12.644590054813788
10.77	13.551671671361714	5.5499173788762635	24.35151861454022	20.355282182529177	11.995103474157196	26.4831671577952	12.827544216263268	21.418205359749273	14.93921744845973	27.652792710686555	20.21195791056526	9.045147393393522
10.78	12.85380775818903	5.502871771877692	23.652995216976425	19.602656156947273	12.4094264608001	23.843967299722834	13.324000207720946	23.153769829285	16.019535070719225	25.70280643429625	16.26814754320802	15.098748355166352
10.790000000000001	11.927207361528309	4.658546935178295	23.50681381051162	20.43666823496039	14.196320458794107	24.740184670193813	12.647627184555379	21.144960846086665	14.67233499751077	28.247980713144553	17.286894814600558	14.94941960073048
10.8	11.411507429767473	6.220878775591318	23.573030838636463	20.705703585548303	13.278616529949883	24.956299019443307	16.96373127153092	21.417246968414908	14.429403929874978	30.666454886455714	15.965772258094082	12.712905915384173
10.81	11.548968928236956	5.7226419628688046	20.75008379044307	21.784551368395867	14.654571291820087	26.107953463551702	14.134224701368488	21.2208732777404	13.128884183696213	34.45186488488675	16.084581225005657	11.128988063508407
10.82	13.025049459755337	5.507363099765179	21.253308958990278	18.67360799910937	15.06698792078304	27.20369622656224	13.035673396696428	23.30252442057445	11.37165384482066	33.31810073132401	17.040712498160428	11.86524716947265
10.83	10.6236531446351	3.8327912429594275	19.70189664275529	19.136295442749724	13.733016613390461	24.78008959789968	14.135161005076114	24.419299628439713	13.116430121779487	31.128807675992217	18.845876756329808	12.055833788114718
10.84	12.972122342388522	4.948592339516053	21.45029733998009	19.104202680161745	11.696997438521691	26.508029460718987	12.293316159356808	22.973861980480503	11.623986488365748	29.872408045476472	18.3257520746051	13.574306052692684
10.85	10.502643349723213	4.590508947949372	20.754886344996496	19.248123109191113	11.34422261599843	24.379788068820016	12.342940843264332	20.44069725041265	13.894134726424257	29.771375447724733	18.918840878314604	13.648978104850054
10.86	11.12718022956525	6.5310783205362215	17.653066924074146	17.897188899484195	11.622269078821754	26.559252535955494	13.11746355029599	20.229526666379776	12.442254459534244	29.691785414835124	16.379723791564146	13.98587944254497
10.870000000000001	12.064558449008363	6.052917413628319	18.981717000258314	20.07710095816001	12.159915774297755	25.713130520038685	12.981472245239809	20.306844606209314	12.793089264378647	28.14880385342171	16.47209669119465	14.79633199144765
10.88	13.532072320633702	5.162845183049978	20.47694239126885	20.588704710018778	13.617150370982534	25.564032935802373	12.55997895183787	19.981548104418785	11.158023299055372	26.949903332915675	15.995788219362675	12.250283296604639
10.89	14.240056632482492	4.785713940349818	22.000606260484368	18.270902579579623	12.35819193895734	26.01921740462604	14.49004951350989	19.49258306612554	9.416233832535292	25.332131121217248	15.579962130881126	10.1048933584167
10.9	16.237975639416977	4.533256899470651	20.961484243033755	19.4608004189144	13.319152326272315	26.603658786921915	13.836541923372108	17.670421415746127	10.386005134791633	26.98919153952508	17.64990120847172	7.970509647504416
10.91	13.186165040310492	4.575539489573657	20.495262151042557	18.222219858269266	12.259869123002922	25.589320917099883	14.499306703567488	19.183689484652444	10.334325107521927	24.900923928405216	18.912726455390825	9.047724085615176
10.92	14.32565556816406	6.804998115343368	22.999701526932455	20.03862304213837	11.485151723277973	27.092297920802817	15.224248066037003	18.72000542721002	12.258263085998593	23.74628856872352	19.218869979567437	10.034121489373016
10.93	15.428718355786573	6.635965108910198	22.98562638414357	20.227437377314285	10.46385404931566	27.79490656107764	15.373121573116773	18.831057510707673	11.323344110630277	24.023782394629052	19.65246538284332	8.18284516158884
10.94	14.106579891027943	8.296771777506391	22.57377352995526	18.506984263840035	9.445854983554055	28.431549499772064	13.849511321968006	18.71328788289328	10.291103298798069	24.554151687857733	19.45700593749268	8.04640845176015
10.950000000000001	13.613601513798748	7.439699613096824	23.611301066181806	20.423822706987796	11.444298010575231	28.48417833268723	12.792684308213301	18.128067098331858	12.92912847336773	25.813479402373265	18.0230276959263	6.831407841553895
10.96	11.704751042967123	8.445232119659874	22.56150035295916	21.453285642656567	9.813631525644805	28.27546344809237	14.507815807643338	21.79254635827791	11.003540800730233	26.66097218768459	19.609645580637405	10.767797404819724
10.97	10.05250266191899	6.991572828135739	19.41620744225119	20.80117048268043	9.140686681018238	26.05512112358078	14.283576612046982	22.849504867576496	11.906939005253655	23.99184741808288	20.589889723371797	11.821640394641648
10.98	11.348445713557624	9.246312733249754	22.048218623848285	20.6366841905441	10.53891207122534	25.424108430102095	11.826021278836283	21.62874795446063	9.389241762838276	26.100120943633506	22.93803728938794	12.408580003920566
10.99	10.347955352628896	11.020097234633655	21.247187130356696	21.503475435204688	10.07059212731542	26.774659532671702	11.318504841433043	23.054230278976654	8.96971525658763	26.624887372732303	23.12257202244604	13.863253469167896
11.0	9.411842236256657	11.199375679798655	21.78629052475523	20.5421090360261	11.276076840300131	26.77120520794373	12.65742657552051	21.564549245578977	11.002427393215909	26.161100476395372	25.61089372306251	15.66835972568711
11.01	8.72638475601803	9.830392877628508	19.344209851438514	20.73613394218922	10.970180603760921	26.234211622955417	10.079717472425411	23.750017938104882	10.298971186206776	27.63809830933398	26.041620611654235	13.902973619663285
11.02	8.391176158161878	9.467965630435856	21.496813123774274	19.89772276249856	12.305361349393012	27.1830792052	10.389341952888936	23.787436429799612	11.393564858382698	26.907470782283117	23.096514549215744	14.442571990282904
11.03	9.375563348066947	8.843986828046251	22.10173160337234	18.354069428804312	12.936927865007238	27.686025178086386	9.463074033086475	23.34551059328468	12.285435277374031	24.01273027523657	25.22594914215127	13.254987043288208
11.040000000000001	8.37685819858771	8.94120906892062	20.31895560904471	18.473879042813355	14.290341603960513	27.367086745143688	11.984835783413784	23.146303643072528	11.105003789099571	25.632585030102618	23.385732471791655	14.27077925234312
11.05	8.215065036490792	8.06383036566151	21.739853251680337	18.96401629822284	12.26533763174691	24.89861051916807	11.507372447114319	21.73372109072846	11.528649166831714	25.708000145274355	21.652434688992578	13.891123906665019
11.06	9.764628491953935	9.598998922926203	21.429589637578644	18.6849105507305	12.790865127666233	26.600531090855082	14.05490983571324	20.684220410781204	13.280892531063603	27.70309351846611	22.470759263300092	11.951013977433242
11.07	8.644509114244226	9.122515015965648	21.381599588993623	21.442706183374952	11.744115751064472	26.13280265176204	13.18878193403805	22.96534512350843	14.731193742706518	27.09937964893797	19.521523892512512	12.921436995613735
11.08	9.990001149967025	10.246444993112064	20.05048440287691	18.717902568458957	10.551860262390012	25.631636188698465	12.903417316675602	23.28206024169403	14.080814530542115	28.84527147766129	17.488092089570316	11.380503568059934
11.09	8.806388880507523	7.58357573277275	23.17484279412331	18.501656506892246	13.336893622901277	26.922343959176658	11.570251508530216	23.455875169215926	14.041559315772428	27.56191075197965	19.796483995460015	11.875967708974285
11.1	10.473931208945737	8.024066515902387	23.344771709045997	18.33911438666138	11.44377036400449	26.78272607850657	12.439953408304634	23.377001373548982	14.71577291673585	27.315482735903323	17.950724437135566	13.808572109031266
11.11	10.188825361855276	8.286253773601718	23.285965445343372	18.495403787650158	12.87792044697472	23.72755660654159	12.093885168119101	21.43060717505187	15.4550501297337	27.574839101515057	18.97624539753561	14.229104239834951
11.120000000000001	10.07051917426378	8.774717809205873	23.58104368436004	21.636649858345486	11.771397714240425	24.813097099368605	11.884048871921538	19.870477635454865	12.278330853474449	27.11768837274943	21.245831594800904	10.9855542533744
11.13	10.723366428134794	9.001041061637457	20.933550283121267	20.59688882082343	12.404744935340219	25.044364200575853	12.59968945627684	19.752482729696737	14.072468792659858	27.451563272927533	20.656815597414074	9.694958848338594
11.14	9.818655618458376	8.945754332661092	20.32736632560539	19.683766693542182	12.028820605382204	22.86616962557246	12.570439701112672	18.74366291593114	13.738657827414785	26.462236691659296	21.134984059763237	11.043101415553476
11.15	9.860111330488238	9.726280374426622	19.83022342330193	20.422070547341107	13.093215885759989	22.542294362113434	13.78379191644196	20.301890653374173	14.997036826788111	25.978982112814958	20.38892458960254	12.106814157587205
11.16	11.216894553067062	8.530533960222984	20.979571341919332	20.395382942451324	13.165841288644405	23.300266890075907	13.232860291270896	18.150016780464313	15.440137707599867	26.617991825253206	22.14220465477887	12.82451002111769
11.17	13.351044490450711	9.090765677360741	21.21998344784678	19.781551006970464	13.930047738924591	21.001565432383746	13.737658325814502	18.079267041335026	15.079890135027606	25.87891440888083	21.952069283524526	11.656427659722633
11.18	12.306368834635173	9.402406412428222	20.88634249411831	17.361237631811303	13.763201071946352	21.38618543959552	14.155678283800283	18.60903759274263	14.156288836070699	21.970984993171978	22.384050973946685	11.574034878561577
11.19	10.884462789625774	9.953194439780795	21.104999855883854	19.69765643827872	14.239904034201775	20.476760529966246	15.413879819574015	18.30742668019457	13.402954847323691	22.140260813963966	24.006446802228734	12.481603771554637
11.200000000000001	13.310757460688945	10.257972719534019	21.103757101400095	19.859866435109442	15.292790309428641	21.586909275095216	15.307001963181216	19.51390292488208	13.92952599369718	22.597043854610273	20.430191084940503	10.82906864116995
11.21	11.322081312867931	8.400541270142853	17.32143002660815	19.690195812374185	14.102955152805755	21.107589508268294	13.351088269131795	19.2309147448942	12.86601493110958	25.037985245637827	20.376790954242658	10.741850151426783
11.22	11.309604746430315	7.01200083349379	17.17582703625169	22.17157356055883	13.677368125963078	20.64866546367535	14.65069584250472	19.76842863939512	13.226004158806655	25.022486363008763	22.230515535860018	10.503970021508533
11.23	15.289449468993153	5.868590177551813	18.999537053593652	21.495337005762323	12.976613770361945	21.56603721853628	15.984035093197125	20.4445609327932	12.233819515713579	24.836167868811525	22.639438534661092	13.076309267028114
11.24	13.496546634651905	4.386447673832602	18.192861067678596	22.125150715960245	9.984314085546805	24.699196434239845	14.752416482301271	19.179278824941786	12.834334796399952	23.363277896173877	20.941037635256475	13.448997656328952
11.25	13.700078544427367	7.721983198863043	18.962970869195946	22.026674335475263	11.74050535206268	22.567321719666438	12.09943445291631	20.084542505698114	10.188159911909136	21.734548062796108	22.616494104804897	14.17965639628499
11.26	9.876236522188258	8.803570977725578	20.13709904172854	22.537762313423016	11.47743771634074	20.263699129686245	12.142253100397346	21.248193525237845	12.662688761163729	22.669212304042375	24.248874133498543	14.234255582128808
11.27	10.333403746196321	10.570859187938435	19.807584764525696	21.020517846186593	9.172240140496758	21.652073140912126	13.51194268218262	22.244525741142972	10.943874022172464	21.96034691282868	24.019223740616233	12.134591108710678
11.28	11.34524190754143	10.050288721428071	19.910148574175764	20.806262984976183	10.212528933270878	21.487030585187533	13.436839019968529	21.540682505994134	12.85086371193271	21.518796546393848	23.00063886998257	11.09827166475801
11.290000000000001	9.917641457392005	11.243089343653892	19.451266571736838	24.196910968439642	11.389895244122428	21.055582004433802	14.908041899845628	19.506572338962734	13.61904523850881	22.032334832193044	25.008122936919836	12.162099861786912
11.3	11.061653110509399	8.945540629098916	19.14221443169995	23.38375396612951	12.157466414148365	22.794794499542505	16.817407879796473	19.352491898616602	14.350058806638998	22.6229716971851	28.193021274560348	13.930216551308291
11.31	10.223068019328373	11.616811795192797	21.31242001345367	21.428265617562875	14.621788449065422	23.17970494747439	17.38811436824273	21.147410565439788	11.813993275710809	24.000033340432157	27.551346616967546	13.013614067884836
11.32	10.637966959400114	9.458611702956151	19.732626282254458	22.21417173505588	15.176597259879543	24.79831159553042	14.544955493224672	23.094822108884824	13.969034799415695	25.104873461823114	25.96854307196004	12.856399574169199
11.33	11.02625915822845	11.090382509433008	23.39178919409407	25.276879389536756	14.513838677614528	24.894268088061576	13.64188288928779	23.617954119475126	12.278185688190442	22.140317962817406	22.51871639982493	13.121553072873082
11.34	8.846806187543013	10.192469036730328	24.225694833192712	22.757387599368393	12.709311080895546	23.590766024208335	13.260368411061924	23.63692379471508	14.16706293405401	26.46201151041803	24.04158543790497	15.562657311342344
11.35	9.375028813590843	9.513008322333683	25.402579998698545	23.97128803351378	13.94473354279008	23.00062272359139	11.857256581237719	22.030062981249596	13.34387423920143	25.353518963235636	24.012323552397557	13.169137973129237
11.36	8.489526541741352	8.131692304754942	23.192476809630453	24.724554998777826	12.384291775399472	24.795419447081567	10.886809096784216	20.998946942846118	12.272044799196054	24.395763975526123	23.01595404220086	13.35580945443969
11.370000000000001	12.931691396045647	8.668225061302666	25.255306455654452	21.622933222427946	12.364852357393858	23.864926167820588	11.708837511973693	22.660443981854126	16.882845680962365	23.79484555940844	23.392680318320206	15.987296850779948
11.38	12.53113977270682	10.577665787188163	26.597278080324806	22.72004710630807	12.535551265969369	23.930437510112274	11.342984470848917	22.338768951603317	17.790855020978558	22.01180688346544	22.61572481597543	16.616133282417316
11.39	11.892020753109643	9.06499532678101	26.24827815332009	24.66404579785553	12.855842626022524	24.500953058705498	13.530365386795866	26.018834688970497	14.980388657529636	21.378109351421358	23.260368325771747	15.615651478143695
11.4	13.232702552886602	7.4126517627111355	21.469526136087886	23.49420495044158	12.077862707522309	24.862320590421515	15.900377626492617	26.070794115133495	14.57571124038325	21.904655928474458	23.669759117585542	15.731746097408488
11.41	13.60820097093087	6.443101731933056	20.904076033650355	20.670859086096343	10.62363803632261	22.3293864498604	15.414769614034723	24.357781390774218	14.58081739903428	19.001906022710784	24.902921710738642	16.107668975292693
11.42	11.412289015385253	7.520793691697166	19.268670292143256	20.137811039472933	9.959888781347978	20.770354310785617	15.823197538856396	24.4414555441773	13.696664878730651	20.156477561513928	26.625308102891754	10.708389949173657
11.43	10.834545253345052	7.005066973343922	17.947959395598563	20.167112247668253	11.987741808203713	22.50522056453248	15.155910771568944	21.579794619192036	11.968817849300667	20.656166224331262	24.863731415941675	12.786730118718822
11.44	13.53634735737004	7.6076415105667525	20.327162340598342	18.453906719709966	11.319601101747338	21.313807353403153	16.40125872523092	22.19258237750427	13.36101444983324	21.1448163233166	24.003234717451267	14.103152373157197
11.450000000000001	12.819461121510876	4.6376466866077735	17.95580075388221	19.563747722632673	10.80833618702953	23.939258248626036	13.609340775127796	22.074151213316853	11.930660651560961	20.917367651996468	23.00582278778031	12.01249859685199
11.46	12.017855076219687	6.602507929041137	16.956894258615424	20.51456093055582	12.57347846510526	26.682090319437776	13.493586275790108	20.64331775928013	9.824518814763065	21.955478019305342	22.68462293385962	13.156804341218242
11.47	12.047884194605793	5.931156685566147	17.344924503915617	21.7276641674866	12.301560429555956	23.429475080014747	12.483412536223238	22.86928224914865	11.981270365475861	23.51984376471152	20.25514164038725	13.371909878116094
11.48	10.192649259634965	5.349993698960312	18.9713863917884	21.350334432878647	14.977437193970554	23.542810817175386	14.556621418599654	21.941140713442287	11.873911815418284	25.193925254099288	20.07218846476739	11.751350409366244
11.49	9.480590557309231	4.858550469926483	21.323182075537286	20.561291236149817	16.606554059006353	24.209029561201543	13.800773471415827	22.856752626899162	15.536396461401562	24.79935260130844	19.449923058975926	10.235942485892496
11.5	11.63676483103844	7.660900729060341	20.302782898985743	21.06230096104178	15.785289658741634	24.46878715513824	13.819468706532476	21.202960525566034	14.23762067506562	22.366253290780836	19.341286636733084	10.63769757636837
11.51	10.589777558372734	6.392140345982158	20.26159751894489	20.97355122568996	14.776975846388371	25.260025292608844	16.207373948996842	18.558233343741637	12.896386316455615	22.746046080341177	19.478130896663764	11.173097097271643
11.52	12.341148582252677	4.941333255578968	23.385877503888963	20.683545866034496	14.352692089355722	26.62840887504537	16.07183305814965	21.11685820902236	14.622951225598225	21.230753740705573	20.054283946981226	11.679406017010564
11.53	14.212319752460262	5.912064945652347	23.01753146130865	19.567638950265874	15.126410286336865	26.403764006954983	17.044398473078388	21.99204270088209	13.867575209239828	22.72446577304432	18.92436308567943	12.593085960941098
11.540000000000001	13.84281344494507	5.311890479309152	23.903676557701328	20.06509309432754	13.998348635799687	27.827918700602105	15.609556438642581	20.117663199215905	13.603990108368562	22.725685725033884	20.80751228724423	13.03312725798886
11.55	15.687649075449155	5.693005579293688	24.775115337039463	24.239209870289322	13.232308419943143	28.100360755417938	15.79621262876243	21.127168492813798	13.220508062764905	23.952433142285024	18.137054121245214	14.816630223145733
11.56	16.54286347791174	6.737842739821469	23.819926051228613	21.133207866121147	12.639208096018939	25.35009588589241	14.199925710354595	22.905699765502128	11.89770904636003	24.576950216666063	18.89062942946821	14.139254162805285
11.57	17.653892642185184	6.892992770556466	24.145290359317247	21.197709829071577	14.477441375952838	25.30227093985885	14.563911452167963	22.57923517823672	14.319377310404217	21.920144221224252	20.161221882650768	13.306015223365547
11.58	15.478656996640881	8.715496429024626	23.656694259492227	21.999295996435205	12.98143939985806	26.28032001677682	14.180440885514228	25.32446421489093	14.145000678822212	24.648289910076567	22.13863080288328	13.733519879211295
11.59	16.90394607223947	6.151186477675167	22.55271147001396	21.08331586163429	11.517321634590056	22.307658695026024	17.77380659324101	24.070734478235057	12.785509019253274	23.450265952317473	24.0417905701664	15.267466842434667
11.6	16.140809067344392	7.078506938367038	19.824213077467814	20.847922464637207	11.76459712569368	22.94395595149505	17.38646889450168	24.475109065353486	14.842169366261587	22.49932721651642	23.623854314119633	14.635712774177835
11.61	16.360423813587737	7.889243337905057	19.943032740850086	22.33377558468716	13.78983215050325	21.499820440513265	16.06089335166195	25.56456099698558	14.421308697779873	20.215108216650552	22.58884833984873	13.18283288566843
11.620000000000001	15.608183184328734	8.587389261387495	20.15724013166639	23.79992855758421	11.380986488565163	22.504980626905073	16.737451116083236	24.31277462411347	14.342938529792429	20.955683925221756	22.72521123987823	11.908303838046873
11.63	14.563147026240717	8.440089048904396	21.017714527516446	23.29310104319142	12.089609353011445	22.07830882210167	16.493119158921424	22.718378838279722	15.258630432340436	20.942743076404614	19.396276128487333	11.70062479818399
11.64	16.354063970187823	7.944708486757739	20.017949769213327	24.651175108395346	14.335465064887032	22.733455334225347	15.507961511077797	21.02813139229152	15.49935958684178	19.968003569758906	22.646647835015568	12.484344661002082
11.65	17.76386447540044	8.282178264765868	20.669250514704594	27.799815079567793	13.589353794476374	24.58714842571136	17.453863972144465	22.156994642275276	14.284030704184097	20.684187034941115	18.384204405525455	14.368987829686388
11.66	16.502703083629015	6.9999526208231275	20.25618959362148	28.20806722314199	15.687622508336894	24.287017449496513	17.896284448452654	21.379008308718227	14.440254692912431	21.5269137939883	19.083016857880352	14.512421773950066
11.67	15.002324734618888	7.276663670235043	20.95766463614112	25.41115267907928	14.174955461433006	26.25479321911407	18.688508308370277	23.78046948805625	13.49825069400739	24.325947623611796	20.053982453878007	13.680521860217496
11.68	13.374323353472064	6.403456316925065	21.694881041513348	27.05510045195925	14.237089406827748	26.193253494187985	19.064522173376492	24.266782092487603	15.66681166778201	25.66510545382673	20.954039695583884	14.113691646493978
11.69	13.385395217669483	6.077955793815147	18.962772866788008	27.24093440934605	15.068823508155116	25.19389136257134	18.753986323290363	20.613738445877917	16.54122824898793	23.730096547608817	19.504090479823333	12.289571724091486
11.700000000000001	10.756528779311072	8.257446358167114	19.990315325975548	26.487042529533564	14.945880785632173	26.67244173116487	19.797963594170216	21.63260398363573	15.558663122495338	20.895003943912574	18.703153323488525	10.523724748645499
11.71	8.487174066413417	7.0332367271384495	20.89570814674694	26.17956669845353	14.881977798270997	27.522420636133315	18.605863003658474	21.009864567662117	15.507621172041238	20.483057636988445	16.969103513508777	10.380224363576986
11.72	9.397090320313662	5.132075719664945	22.655159935372243	26.1122618381852	16.007885367422404	26.88540639294889	18.32860191934848	21.241818369398906	13.592400620151672	22.844531167224797	17.289263278667907	12.277527484070685
11.73	12.853235855421882	6.710072883258245	23.100142810053825	24.60136978685926	15.310875386726815	28.030779804807533	16.42246576265189	20.269470252551404	14.825473253772921	23.10618245254447	18.376427073585507	10.990160424211176
11.74	13.781497740868286	5.576218701143964	22.646487382565983	25.118942499017354	14.084663385001855	25.63870981556504	17.8617082297015	20.77289257971463	13.330389887175539	21.43354969992577	16.573843596305274	11.700072913418419
11.75	14.7922688491259	7.196022603554883	23.308037428976725	24.377081831292976	13.760596868266907	27.505456292837327	19.513317694547045	19.0213422483353	15.404593164381584	22.232584952433015	18.538575561191468	11.869794499007481
11.76	14.382175815326375	5.786141935237424	23.195128727999442	23.43891485312034	12.95434247971174	28.457662221491727	18.573896729279493	18.04069048638224	13.856158593188427	21.624254752575673	18.751558564201535	12.109873852221192
11.77	14.678279564583447	6.311646389722288	22.351486803046814	23.832231640783682	13.436429463972708	27.526588713256842	20.69539969593169	19.103425320864233	13.451539846218116	20.46336088294507	20.512465555717974	9.5983627638087
11.78	12.50635400233266	6.863124582137501	21.33480409910907	22.605401513064955	11.506592041685293	28.930188541940552	18.933555944616597	20.041100268351112	13.174789058956575	21.07421664601037	21.14304849234361	9.190647108326129
11.790000000000001	10.579266147927802	8.245081979496115	20.314051161921174	23.049195006706064	9.3414814073036	30.309620010063508	19.85176382851106	22.120854637668398	11.952588965197762	24.374551417294665	19.85187613306838	9.425269932333496
11.8	11.512696488520909	5.479101646484577	20.762344203468814	21.678667927281996	7.70273681868538	28.8556656974657	17.87627381611273	22.253863278216276	12.240484189360561	24.003509786824242	22.54006674224557	8.884876444127308
11.81	12.403117809769203	7.49034648337885	20.39241380955474	21.608928624456063	10.159513171438729	29.065840785335894	18.27412392890019	22.408285515715452	12.318448929541612	25.984495515625436	20.634875537254693	9.270810360430849
11.82	12.40406222099536	6.015193618360285	19.396868741770966	19.978745085447393	9.911031571877468	29.055261985501744	20.367448824540695	21.206920364085388	13.46903575643735	24.42831363425397	20.32578313178164	9.82787571256629
11.83	13.013303947291494	5.529581190684826	18.04584273214917	21.44518690413198	11.785122313387468	27.990950051364422	19.160261752751286	23.01699148291902	12.630362502401105	23.320106211842887	19.677566777421028	11.259805624245086
11.84	12.483643196170268	5.65037149688135	17.393644984646524	18.409185941571575	11.737269897046675	26.184721261956195	18.91491556883659	23.341001246869638	13.115926629191074	22.870852758752367	18.74189937694394	10.736422021682353
11.85	10.635031078428751	6.3311553382513805	17.33268032607677	20.432469102382598	11.914763350434503	25.376376079194465	16.431967746025602	21.227799325836465	14.53438941420137	21.48396479146116	18.907728214673376	10.297418107947504
11.86	10.143076143830022	7.895819563840077	18.106613694293078	20.028939215773978	11.150243907859426	25.8848185982499	16.93254994268725	21.21609029560223	18.06507376527825	22.214193693821837	20.00135167392557	10.933986184123604
11.870000000000001	11.368043099979806	7.535230606103407	17.421493147078387	20.18593189803952	11.772039289459018	28.05589543324755	18.973290742278994	23.96668279439637	17.58104798338293	25.62422546600906	19.987783456386488	8.611948807663966
11.88	14.35329481483781	8.3589793303484	16.6915909357055	18.53864448459272	11.019541716210002	27.485070595538062	18.49917396313618	22.0842192808922	15.107053275550308	28.217281216664215	20.614844890053636	10.93873144540198
11.89	14.046602281068106	9.173906308757338	17.309376307697473	20.11412654176437	10.757093647541957	28.771431108811985	20.143729128599848	21.089206007236974	17.341303489070775	26.643656731700837	20.68649177301629	9.284735264355835
11.9	14.213990000259267	12.067209119757688	16.689461366756838	20.866882706298572	11.28476842830746	29.096708310638544	21.048404229639438	21.446313768890526	18.292007566782225	28.027238624561882	19.123467041940838	10.48371369876762
11.91	15.43022155921314	9.08083647545203	15.204543630701686	20.288667911449163	9.90975549615555	30.401225814321755	18.860866888282203	22.324041155950912	19.59417965792901	26.618015276501193	19.800377906123305	11.132552106866015
11.92	16.31207620403939	8.54139677227894	16.078516040764207	20.324484163454805	11.242401172609265	29.806289799318307	21.287820310687316	20.987110065918372	17.760435917267056	27.19923087998747	18.875855728338173	12.930230300285546
11.93	15.100288997428496	9.162352075738642	16.238028828488346	19.865699642938477	12.705188994899872	28.99479948882227	20.531930989542083	21.20528732577516	15.730236506821296	27.661991879230616	19.68896158477303	11.194794584548022
11.94	16.6280802230105	8.507084673322018	15.033240150022337	20.604488534194417	12.32711789247624	27.154033011806046	19.742602007888753	20.588062042602715	18.565402094496484	23.802037786603417	20.47229632093856	13.40073453394626
11.950000000000001	17.96355623284236	6.417014202312359	15.811107875263904	20.579683324250333	13.010881140762619	27.626279799219926	20.99174224139758	20.46854021235219	17.328291093493977	24.953604927773195	18.85632529063189	11.650903962196466
11.96	16.817947238670698	5.652170355773616	15.733293789032057	20.28920122722718	11.175066584250665	28.201404527875866	19.853680798093247	20.79484890240909	17.963646526102114	26.96283734193838	19.764961891712925	11.565374594281131
11.97	15.506398696463926	5.870882051893846	16.267109369341068	21.29465913879186	11.406270742164075	26.81468356911529	19.921975160571293	21.20883338769634	17.500447548800945	25.754912195872244	18.685978911511704	11.20253381101713
11.98	13.712741310324255	5.386098196544907	19.59979167766585	21.693763578086823	11.152443312700875	25.746503484425435	18.370249634388983	22.283631607663104	17.262714677927793	27.422776206942324	20.278740788662663	11.843700681187382
11.99	12.952492904607572	5.625207948344306	17.366036921068407	22.95896842813055	11.1841556541708	26.567272373708548	20.668603615574856	19.90745931724498	15.671306200862604	30.512444771527555	19.23383447733721	13.466640821915785
12.0	11.904773999063146	7.593932288726655	18.170026168120398	21.836258406768142	10.254004632837665	25.41465257426719	21.21025714359432	19.903572095885405	17.068967228348864	28.036329154101605	18.28748869568981	13.811422953814619
12.01	11.48831395750826	7.325500175233442	18.528261391381815	21.683771133305978	10.723182177435048	26.43923568184784	18.42413833831617	19.58125567101616	18.15642117214533	26.947118550616107	20.872853224062194	14.06667099111574
12.02	13.456014446134274	8.372823137358855	16.694711111253856	23.570865316037192	10.545942120849677	25.98199122971161	19.572604271152777	17.88608436970929	18.585508378321315	26.410375224798436	21.06463515077421	13.515752983746182
12.030000000000001	13.392555184462315	9.6257905082469	19.46054009951001	23.672986703713743	10.063244610156882	28.278302750203128	17.56364435411385	16.898045399477688	16.110541617673825	27.956125876482897	22.43626055665022	13.85453514000098
12.040000000000001	13.069912461517205	8.277377659875397	19.276382304391074	21.748689291611107	11.984230011309107	26.21800046250012	18.434628806493635	19.520216939120004	15.808557586963646	28.195325039222023	22.921300252468637	13.76221551940114
12.05	15.764075100684002	6.259327297549425	19.625795002729564	22.811783940728496	12.704497098556942	24.713571610077146	17.24466104535373	20.70234922663079	17.721404255226087	28.46643908212925	22.664338141332003	12.917135240201713
12.06	13.910082416369706	5.125086602613755	18.979293577694776	22.856408397505845	11.88798636419466	25.783336557649175	15.576950536713936	19.71622108718995	16.748131180978394	26.827581394462957	23.073954066834013	14.565643429959358
12.07	15.16558734935724	6.743303390717049	19.77572979799932	21.78488299426132	13.071324994910333	27.00663016818041	17.89388308964874	20.56834480142563	15.960159330872711	25.207023161852206	23.987535709313317	13.737147199020683
12.08	15.291422917948159	6.485812759704704	18.226554264505484	22.01103407901334	13.08162384480639	26.240250203265283	15.228026356508959	22.800539762082092	15.457488860967434	25.172444042833426	21.507250026493473	13.276261053617464
12.09	13.224064294108416	5.307539687251171	19.345554697701505	20.61568374142083	10.644080560218947	26.49145490996272	15.15697395024517	21.07455393888979	15.185639087678299	29.222218055758844	21.635780376492576	12.738653752271738
12.1	11.622457180025265	4.833965961334093	18.844385843915692	23.155135840279794	11.522758943942259	26.346841453206792	13.69225337949909	19.148446468809656	14.382605474831545	28.747045678431682	23.058929025729977	15.369354091246397
12.11	11.654545834097044	5.783789535926896	18.899873319834	20.99539012196132	13.37842300643323	25.690831932160794	16.135927699838692	19.153122112858107	15.13608911580573	28.640223663328868	24.38354977444748	15.922489359295234
12.120000000000001	10.271312455325834	6.617373925739424	17.054351206230226	19.84658339941656	10.711519887418651	25.850485042537176	15.565510557365382	19.576123299932856	14.002802078750769	30.047863551101827	23.070873411743374	12.650362774830333
12.13	13.349774158010232	6.022196183506767	17.270966293043102	20.493530479465008	9.648949944371024	27.062572276282616	16.8498262293269	20.489709058608735	13.007510877693797	28.81966860800508	21.274484090359948	13.802846021845857
12.14	13.770073634570224	4.859179645253607	19.49518477859221	18.811316522499467	9.554908661099143	28.08891016697608	17.510871689125995	22.434606242396818	13.764328349353642	32.02426661362985	22.61155778174594	11.054499468810322
12.15	10.998241354790753	5.309870023327513	20.287822885113002	18.29887314655452	9.652029000857274	28.44829611874543	18.793718277342602	23.646378011965822	13.89983172637284	31.938419939824698	20.034188696743463	11.401659488562148
12.16	11.532708439155455	5.6973736403409685	18.912440167603393	18.203464877144	8.306094412818888	26.725934892811974	18.77273378825491	23.772839728476338	15.411935893071162	31.457405987084385	19.751915484841962	11.79875120135024
12.17	11.000099797490117	4.4013549241948295	17.930440911610862	16.383636477488757	10.992633355807417	27.187588825267067	17.803996196791545	23.304141937500187	14.239009465419567	32.24617333303319	20.728749728017792	13.966872909551798
12.18	13.994719584628164	5.016595811294383	19.703761432068237	15.821711809600307	10.23300263317248	26.930161277477175	21.748600282153376	20.161956335138715	15.999620813686494	31.154484192742743	20.960325050892354	16.011212140744895
12.19	14.448044153517008	5.319202630010494	19.42216321033606	15.62198196191921	11.801424421515382	26.860219305275017	17.146496260887247	21.205169200476657	16.750994151884633	29.738312361945983	20.734691150778445	16.11234381471367
12.200000000000001	14.088040784275684	6.190959889337112	19.335879648961487	17.007587058295307	11.710858518099833	28.132661738426098	16.97627902384782	20.162065810232267	16.196304490654388	31.34758662944829	18.642164857128762	15.069487863800095
12.21	13.301726638494163	5.835319877909919	19.47505509860886	16.881330283814897	11.142460870826502	27.60206583933836	15.849353717121117	19.25472569190189	16.036985961945415	31.60330686026603	19.71296967179238	14.626206267857128
12.22	12.352970811447106	7.639626012299565	19.984034361501568	16.154955702517498	11.962526952564591	26.049624493965695	16.665823797027254	19.854985547013676	16.331469332238264	29.161138749007595	18.322605815871814	14.566482833754439
12.23	11.268177031060276	5.434650692265024	19.923718082262674	14.927934079229754	9.45855967892371	25.57174850383196	18.322039590944197	18.430864847977322	17.141108418669415	28.44152518792454	17.480643741836857	13.034456219524852
12.24	13.050295959064053	5.218436751563871	18.984350831201652	15.026262811390074	11.123832492682636	26.671149509562564	17.91731278867088	18.22015290532386	16.306376842914293	30.21946889066037	17.371247779592476	13.175280548857499
12.25	13.247070056638321	5.986449990139189	20.894120909867148	13.374377625991064	10.568932003846633	27.037592917685288	18.40802505290519	20.923516119346026	15.283182873154782	30.428660443108654	16.038346632668322	14.294730647547285
12.26	10.830028885058498	5.198813405977183	20.072855311332688	13.676144831692277	10.224411943310928	28.0678964024081	16.50966908621864	18.22431512925822	14.90746513561476	31.73601229335463	16.449558026397263	14.949246664681306
12.27	11.02575556790531	6.936392854357749	21.37844131506098	14.946452989766257	9.560630737539583	27.341479282862373	16.465593778709092	19.471939364461637	15.071764376271378	29.42712410838112	16.821765931823386	11.649410816514491
12.280000000000001	12.1341065580716	6.829234060623046	20.940884384756675	15.017343594427386	5.442406465252475	25.846094562549272	16.66474451595324	19.318507207803457	17.446949937320344	28.409907643090627	19.7193854412206	13.425141761496194
12.290000000000001	12.292312898382866	7.05899308161774	21.399668242700383	15.19116120701088	6.941946159051863	25.58640898210258	17.72756071382618	19.695023006382737	15.871589172197295	30.22204819168951	18.887778006477593	13.501848712034196
12.3	11.230732245116778	8.17164440489149	22.841412873850988	15.881209509200225	5.9991624324110315	26.558448330952398	17.230426383861225	18.711909850363295	14.240074018664655	29.337204028234133	19.70057930486726	15.663646214797598
12.31	11.5247305142019	8.337942875457223	21.126183295814176	15.524301324202003	7.456588501340284	25.135174756199792	15.893955358424478	18.621717521932407	15.195961838086099	29.19990594227357	19.677361151238422	15.273273645370613
12.32	11.306868228938294	7.17019873866164	22.00502463273545	16.51568054886737	7.818593221868055	24.658758010896467	16.006233140960585	21.729358917483275	15.520163792115795	27.034239558026147	19.379822749257265	15.256237140694042
12.33	13.181727281311042	7.497861912316498	21.19853969241265	16.95146191911502	7.962596910956481	24.445064615969073	16.23649571619627	21.66603980985612	16.26647326292947	25.427395359344494	21.93532903409202	13.710400878604982
12.34	13.294320699414266	8.95555922296111	20.840655277375838	16.17022839902304	7.978498344422033	26.103601996575208	16.013776433459075	22.9394721330258	14.437262108020136	25.218473752727753	21.071192383982204	11.513193699519293
12.35	12.380757996208917	6.983807315862538	19.51941414542571	14.962098432508586	7.43845406908296	26.17379724779612	17.842478192536532	20.065285679805076	16.06394569235039	28.520863452480842	21.689175192051906	12.052639222020371
12.36	11.871905468309912	6.447775896817124	21.8172716650362	14.964580455861219	8.503421073516927	27.545003471034047	20.299890104659777	20.276232407055165	15.605266585479844	27.99107228961117	19.413191763050808	12.994524957150572
12.370000000000001	11.015621531642118	8.667661487866802	20.569694540820848	16.86690454836901	9.016730162448136	26.928902391102383	19.942236705886405	18.743447557551008	15.610668931151594	28.68370729065037	20.497298249344656	12.646523389404056
12.38	10.421076164631254	6.874524896587449	20.463648385752496	17.562766141749453	9.337377619417166	25.77904111753994	17.789827501778618	20.489184459710916	13.594438848054253	28.692758727639323	21.29652881189448	13.225818291271956
12.39	11.178335954766911	7.393601820543717	18.206146963068853	17.895280783917688	9.751772783752745	28.0681673152489	17.541126204101975	19.952451536419307	13.567100334823397	27.90190987129846	20.439456770285265	15.12311957337613
12.4	12.04050656837227	6.164349931607381	17.22167444829364	18.34215463633241	6.732076592259241	27.894988987384107	17.21438315275235	19.958558453295748	14.444200685885692	26.061721446636394	21.869875503597036	15.36599440225284
12.41	11.056292271596513	6.749768794729679	18.907496106372232	16.761016583540552	4.58307904855442	26.36636156111095	15.052834368339255	19.136822064203677	14.615990650631284	25.310404865000482	20.517422033616608	13.988682185093849
12.42	11.286434968979659	10.188921262592975	20.95368887152523	18.48289585788431	5.1047282968809355	27.573687892135446	16.43157454685513	18.546290661682175	15.566943172935645	27.035261664783466	21.348687525079622	12.301930831088276
12.43	11.001579338400248	7.020975361440626	21.995562785944003	17.514299121157908	8.249292553291275	29.108537590277997	15.981545934818497	19.84139532447297	15.897865887766534	26.394850480343585	19.703096330312743	14.929341222140218
12.44	10.365431708655622	8.58149457641164	20.0864474200628	17.17901647952594	7.593179380798819	27.16627212234755	17.12369269997347	20.446220551904858	13.177812216864206	27.033223901696463	20.30950474301675	14.406860929929712
12.450000000000001	11.420482408459382	9.935267553083593	19.367023925183947	16.442068896446855	7.326051422963708	25.804724909403955	15.212930763457395	19.331835362506347	13.903184727285401	26.832687063389884	21.991031324815594	12.852312224515783
12.46	10.288879105261534	10.39349669720123	19.305046601997155	13.925610024337841	10.179716821471716	27.762843760882266	15.665358636108044	21.366160825678204	14.413332026130796	26.00946326170303	21.3957708021354	12.07355754685302
12.47	11.18006847370535	10.132016609945724	18.66041778029914	13.19682999870416	9.296395886627993	26.21716485111094	14.43979187700389	18.89021322425989	11.712178862184535	27.398444662109412	18.01230737704747	13.866011015832095
12.48	10.189026026118414	9.040668190527699	19.89181011601649	15.229781800979879	9.476615564325462	23.75518293090309	14.076624979629038	20.494283393402988	12.886849018330555	24.07247764141876	18.31248902570995	12.691081219522216
12.49	10.769327953550155	8.743418275899307	15.280895895808687	14.397588350491047	9.013629465211787	24.85041101578608	13.716785957772087	22.583823663198846	16.089003802823843	25.305221822769546	16.817285929416677	12.537211040202878
12.5	11.169686340155787	9.982006214748166	15.230496488529713	13.655816618655265	9.122179307118166	25.56245020969594	14.52085000823424	22.796595893525037	14.689180287045122	26.34577102962142	16.581279138633867	13.777909157227871
12.51	9.577809310970869	8.460639771795314	16.864713492101444	14.15438119096983	7.086097596687712	27.283881760393637	12.990454797052099	21.983707317645028	14.520699084569827	26.58171847054122	21.026721556376007	14.896440621542336
12.52	10.697016545650612	7.9375800015797475	18.629562664742974	15.740813571559348	6.364624885436445	27.34855352900743	12.76546975890488	20.999260201219055	14.03275687258713	26.768610371865343	20.553271155987925	13.35737271521755
12.530000000000001	10.216438523170416	9.333115056613524	17.939341269750052	14.304365975931855	6.096723005352651	26.275123701269465	13.734850292636544	21.39620515428538	11.258635873495042	26.797310315406364	20.401287691234796	13.370417231372262
12.540000000000001	11.04855900434505	9.71262031571175	21.939513113680555	14.70480542331999	8.54747392944639	28.689875330714862	12.262582686577339	22.415322949024794	13.012919767645009	25.818028325061626	20.526572261759906	14.065315688811376
12.55	10.011497343095522	7.8997422765816845	20.670881748070173	14.780692445870285	6.756751209807	25.978713991914226	13.68468799319225	23.80422525411016	10.833299620229058	26.482230703039193	21.258324690602578	13.03567932538311
12.56	10.727214136842132	8.255880328046489	20.418314972433418	15.70152204740335	10.71448412968346	25.52239917232598	14.405767445832302	21.63925780123755	13.332106021652557	23.962526221935878	22.750785303141264	11.673658144498344
12.57	10.264914655225233	7.661525658479453	21.542766793748257	17.338097251110785	9.791909512324205	26.400245744352496	13.763831841795875	19.34584214704696	11.959865635480034	24.613625290249388	22.681387620635167	10.176858618116752
12.58	12.242364869822742	5.98516280626777	23.8187968152329	20.192858740839316	10.291183770433902	25.630908778593252	16.233833798118972	17.112567420062234	12.916048644670514	23.25640679546277	19.9372755643967	12.702062158287061
12.59	13.049097048497565	9.045310290098202	22.022927988134814	20.853913133408213	8.91042885574575	24.81762155430853	14.675598153502898	19.185229732664073	12.169079243526326	22.348631866562556	21.27592873370491	12.005782088591163
12.6	12.326717191565345	8.480348969307643	22.402740487621994	20.988527203883912	6.729398326240411	25.46726042546197	16.434848986876247	18.831721577008683	12.311580320839226	23.55443806690648	22.34059554634705	9.862015859229713
12.61	12.233846083091304	8.55460712160221	21.67515860693029	19.91271890488458	6.579547354313326	26.317149938271367	14.766299839850209	16.7714922068817	12.681154896315693	24.16632761814372	22.819731191007115	9.591633750762002
12.620000000000001	13.56716557571222	8.158043923829684	20.326225938028866	21.832176506308166	7.029175439470315	26.164478392459095	15.406997065831915	17.781991538515477	12.905731695397469	22.615744544166	20.639013705305537	11.5578224018036
12.63	11.088406328100021	6.752505109869865	23.613758551165027	21.079454540542763	11.094316904249167	26.397865773645517	15.223785812751997	20.00523077252327	12.448126126521935	22.634674389166424	18.026461321606067	10.970215131024698
12.64	11.060068253812451	8.100414813719489	21.79256892513159	20.830695169229173	8.856631482053992	26.9636888864905	14.47921361625379	20.48600636014951	10.653922041344682	24.978071319932305	19.69486216351566	9.255038741112072
12.65	10.34568398216134	6.953185051447458	22.911890351674685	18.833016626272556	6.937830060292226	26.977241191533576	13.037716057336443	20.271170707223575	11.235117097672253	22.269474033117937	20.045132503185346	8.706417599752026
12.66	9.428374439489856	5.438215678270452	21.56706077129177	18.02115831727205	8.828017483358353	25.17129017318905	13.399102741169756	19.602507141301803	11.756622040872282	23.0136615068872	20.895510729119444	7.81109116448521
12.67	10.00931700877775	6.181476967716592	24.059483323843754	18.862482927875142	6.9202968428349445	24.238928723672412	12.076896850584196	19.019086558733154	13.534158732678605	23.679378244411993	21.50952202643103	6.725174142908379
12.68	10.320129604292774	5.580387705908809	22.958705548436047	17.21231927843952	7.648782404087316	23.57581013414635	11.276743150664293	17.39853321230254	14.474333913462193	24.267115821350288	22.719920028327557	7.4925209259753
12.69	10.852942398698868	5.920557685466389	21.21388976800723	18.271697797552203	10.415376060565805	24.665932271679612	11.492213859779618	17.657459835742035	13.38690711853073	25.63130337365368	21.92232274948947	8.093897915781726
12.700000000000001	12.324906706534806	5.198461442113752	19.961628182642038	19.33052505002955	6.098584232567322	26.009464512453132	11.981854984199996	16.296441549309954	14.527330717151074	26.40919055747462	19.800437680655108	9.165902666172407
12.71	9.688622700053765	4.467781054283224	20.563741056154385	16.885104472845953	6.052369578268878	23.818903033039224	12.36904541582778	18.677298223816607	13.096592545325327	25.77965293388813	19.539774251360654	10.338447501317976
12.72	8.882687304653329	6.322438291058863	19.263522012277566	16.78355983352913	6.667349429852489	23.132650044314033	12.930958056806851	17.133465959833657	13.460388379512489	25.235042553746243	18.152881894008278	10.258959943352771
12.73	12.875667728899673	6.433476474429235	20.43336452320168	16.81276694061084	7.0209479590493205	23.11940952470685	12.815302601938152	18.347890357906	11.130165158381306	25.84904621855129	19.563901700150648	8.259396459580435
12.74	13.217221293856644	2.675251925344438	20.837424392291304	18.125216456968364	6.272474411435661	21.135258326010604	14.63378578041704	19.53010517222134	12.493664460478698	26.33787402120365	20.322334370592145	9.621233389044795
12.75	9.9693681627616	5.187598025462882	24.770452501522023	18.082210856333937	5.939539956149452	20.911229440541376	12.724041124373779	19.07785915915632	12.864168447617297	26.444503076888388	19.336951650130267	10.24636438588769
12.76	11.995001525269847	7.08449666238923	21.59987766141636	18.487160462094938	7.384241638227215	24.190419115487167	12.210423213306687	17.103280268012405	12.431737607427289	28.117460302589745	19.198947924807445	12.205174985286357
12.77	10.919134721094943	7.219172150840677	21.75101901391819	17.044174542911737	6.536580323358168	25.361767911531814	13.146434112260991	18.66226705052576	12.576954814922695	28.50926471356309	19.26820188700229	10.842740830608978
12.780000000000001	10.734391217961065	7.8121140170446095	22.51250283907346	18.313017823884287	7.383882166318463	23.774697968465052	12.971868238543555	17.90461162115965	12.09862931869955	29.684440286955507	17.794023957916036	9.813925940687385
12.790000000000001	11.13300816140324	7.084990980983159	23.473573560883437	20.04087836134341	10.384094520115783	22.58527476343665	12.030778299370454	18.477295698716496	13.091605566912605	29.72646446945556	18.377668588028797	10.110877621357771
12.8	10.000818525389613	9.565234724464318	20.213598921507725	21.103202714013705	9.616265767756746	21.94098722913039	12.013021482874068	18.566570480274727	15.028215727338704	29.276505092817278	17.530184076730176	8.710198892115324
12.81	10.495128843668287	8.025969763620592	23.2915776239449	19.103487299568627	8.359341961189099	21.475467281198398	13.557621143196604	19.895409703594	14.080967842483124	32.24449646296732	16.194504985703485	9.091709452900785
12.82	10.713835620370752	6.776096319105866	24.484577937366705	17.413590711510658	10.943120708094344	22.672097655983002	14.329870630881812	19.170181397135924	13.891852372795737	29.876373098220586	17.08273080322301	9.504286731444516
12.83	10.637782921404364	7.542583841917876	22.98247069672172	17.415121889263325	11.408765842092738	21.405061367197238	15.636296146450258	19.827112200243167	14.591512042967418	27.342384412867673	19.2381798766373	9.91431679153092
12.84	10.115509198052276	7.8965167347687935	24.932990056660525	16.911317102556154	11.940971759488521	19.954646197588556	16.770636320947965	20.36265492597112	13.102389918923574	25.19989656987758	19.34188534131471	9.941263813548339
12.85	10.905544658060297	7.278663562672469	21.454771855571767	17.106612233293436	13.993404497037147	20.23741275828019	18.852487971082276	18.03518620690088	13.801656545967901	26.189458552286617	20.096904214216586	10.86928215781691
12.86	12.596410890088348	9.227618656481111	22.725110216552505	17.91991082139022	12.522074317348139	20.570758579550482	15.732440765961101	17.209405893356642	13.460924737515043	25.52645477184617	18.804011035367616	10.093597865844137
12.870000000000001	13.254309989301785	7.59283640421042	21.968229479217502	16.40872953373811	10.27755869248941	19.675566625223876	16.27668588631473	17.807763690728688	12.002893547884225	26.050770693480715	20.42252970078854	10.522841124968545
12.88	15.175889367996698	6.603556930919773	22.631819594687663	14.573113957263308	9.507279813916858	17.411088855105792	14.28230108584708	18.12273961241108	12.195291598632668	24.800083434287306	20.183209105039474	12.066495043282938
12.89	14.719899227746524	8.80913213663587	22.437654973067147	14.624063332698853	10.518377354272491	18.43441085385845	13.236407850099196	17.422366975378775	13.55758630215382	24.24854740951121	18.846404968816312	10.10185701256145
12.9	15.199751997993001	7.746689359406719	21.18359918921392	15.095287281345088	9.357456911417783	16.67472359878299	11.810239795846927	20.74104946732329	12.088074044020471	23.28281602840935	19.921363341562785	10.47976372006022
12.91	17.013611140605356	9.091490911274526	24.7686138965721	14.765789274990334	9.987046633946845	20.414656366269103	13.566570672030569	19.569005730467143	11.947214130345085	23.27093827297525	20.66974273835667	11.376760957089363
12.92	14.47434649737779	9.769092889311066	24.950856025963322	16.80329507350626	9.10832136151125	19.927809901822226	12.556436250210425	15.597005132819634	11.592614787551577	23.740864416331675	17.76426110627626	11.686694233169632
12.93	13.595740763952977	8.7338229092834	22.9847590581074	16.896821416602442	9.898781323325865	19.10100047568357	12.683511191909515	16.019183355858306	11.90505950593972	24.416178571205812	20.064904274646807	10.807576823993665
12.94	14.407449454098026	8.660584204163873	23.044547441676624	16.63145771995739	9.457892920771961	16.848287465050614	13.694510046951251	14.801140423627718	11.881250232804652	24.160797493014385	18.202428000502607	9.52523067031631
12.950000000000001	13.189292980287117	8.111712200045359	23.54365049290345	19.521919584419933	10.883186919085178	19.385068692855334	12.213913975946713	16.165766214017054	12.325491271121324	25.406587372696002	18.4951187286653	8.440909810329675
12.96	14.06348515092774	7.360292766834292	23.255743276920178	19.699556889188173	10.454588759359694	22.735976487108392	13.879567711886246	16.123062037617423	11.939315050892455	25.83111598901448	16.87642173548001	8.939040312643556
12.97	12.115109745764421	7.103057455049423	23.454413614184688	19.244550324603587	10.153644756976059	22.31564125215838	13.497063472227099	17.521254326503858	10.491060625697491	27.37711043857329	19.670649274608177	8.944481224299157
12.98	11.92860916760334	5.139144084302716	23.55675331877311	18.010607294243503	8.674451268616137	21.055119572960173	16.63762329907163	17.23915767544475	11.94837762215646	26.680145863388724	19.505674070682	5.626556144142073
12.99	10.756698840450419	5.181132873559871	24.27482222922431	19.417889659189044	8.823022874910317	23.52965368505657	15.040108006025742	18.711545957867404	12.201002721220553	27.29535015912997	19.67915143946861	8.116924126658812
13.0	10.45480153661899	6.242369053718189	24.83791369206791	16.67238999271479	9.947783939221356	21.119444276402547	13.619437473992992	18.130034553706796	12.966013048639505	27.790689319948427	20.51357226711603	9.60305334319544
13.01	11.009960805869841	5.859882048375965	22.92259394367096	17.706402869081987	9.463044504951526	23.26905903340378	12.877050723675739	17.53943145997976	13.735515177186047	27.599413194949225	19.89154020482528	8.687897484202402
13.02	10.960177824604296	6.123622439407086	23.57353879336783	18.964155532102414	9.607939699451626	22.26545555258581	11.390002985369698	17.772718897985012	12.630300093776667	25.279380878812155	18.977854391065083	9.076086346654675
13.030000000000001	11.589698034888853	7.894153056892739	21.42960336445652	16.10396987095551	8.96495607524586	23.395183893143663	13.38958943932802	19.100865316571454	12.684552425476515	26.492750377147363	18.715707061595346	8.513821621933385
13.040000000000001	9.84599612669374	9.044730540693827	21.744514356174303	16.57671405839288	9.650612239754846	24.301543832782805	11.755052706984745	21.19996054662896	11.2760969935016	27.01740168080495	19.806213375249637	7.762306035781269
13.05	9.345501959030145	8.718787094376859	20.772532097813475	16.619850666299953	10.023808322624921	24.795415312358312	12.865166189761752	22.374891964244483	11.677172136275386	25.97729643878112	20.448958917949177	9.412342168807458
13.06	10.007881338140047	6.934659989965314	18.194429891851197	17.365570289849952	10.879470211902575	23.076974580449736	14.292460199141804	21.455141215788	12.733221779212764	25.275869825233627	20.731869055034654	9.134875733638065
13.07	9.086657336902642	6.689601677564579	17.82468878422317	18.159885185629776	9.30008406423048	20.744952741476368	13.685388648112204	21.21238936901705	10.186740903839626	24.677655247947424	20.27433313655414	8.185193691596009
13.08	10.849544653460528	5.976061320686795	18.52472943715755	18.825360480278192	10.035241576385268	22.532031937660705	12.81085172319196	22.321411454594642	9.143362689063245	23.680886663641196	18.350150453776912	8.616560656183452
13.09	10.041357362378317	6.9025183450333225	18.66832254997526	19.218426160543313	8.173960559376876	19.36760077076254	15.170589771201884	22.471964599907878	12.088363903822685	20.171808514726298	20.303938931565224	11.395714846834208
13.1	11.804429922924493	8.317514500918486	20.314129011791202	19.67625868935542	9.857501679420222	18.92517789301958	15.174370299247704	23.13219844215481	12.711364132022835	22.704904716885412	22.811420368310337	11.6376394486826
13.11	13.154298207417803	7.9064297392280265	20.533849471698282	20.51104472955398	12.93892570446286	20.30818860272564	14.66827941735409	18.497443195529033	12.510897984241398	21.4612397733257	22.87937148222615	8.647880727347376
13.120000000000001	14.546449345134087	8.502522270957867	18.141450698522807	21.482226463786567	12.146780034836157	21.221802440617292	17.02868019872407	19.508557770703547	12.070097885015365	22.207379947673992	20.48034425268053	9.509167921238216
13.13	13.771706383097808	7.0422374752190535	19.66576846809963	21.28953691374663	12.794921513571646	23.30264115081227	16.033097974701924	19.887955065841236	13.610291551201252	22.038673340467632	20.060080695953783	7.726816139018904
13.14	11.191030643521026	5.856998696186631	20.977367640373476	18.589112538439764	12.41773122758223	21.745068850016313	15.37893598639423	19.616713337847447	12.35679523499855	24.523591809473427	18.845881550288258	8.247801570042567
13.15	10.611397784967037	8.520553644547721	19.442961720715036	19.04533613471239	11.101527274992286	20.253896250932755	14.859515998245936	19.97819990221907	12.008813844108186	24.75552635943892	18.11405287549667	9.648713505550747
13.16	12.115194713631196	8.42757696952194	21.300766023890457	19.576723690312654	12.241809489570356	19.905450515789234	17.38485175622985	19.9727286512619	11.553599102211317	25.69882503243494	16.438252820745987	7.556851461257534
13.17	14.427058245661621	9.06395920590122	18.037325864069196	19.963214635030337	11.878841165640862	20.82252425183981	16.839079860680307	21.41221273700933	13.286563685470302	25.902837309656487	15.28597276784384	8.605491162015532
13.18	13.393102432433738	10.617803135015777	18.038378517725427	20.81512827413557	11.78363988280276	19.877726395779273	16.793389015453403	23.632533047992897	13.346767987962034	25.89382823160157	15.473119566355837	11.757326585751697
13.19	14.142286717614207	12.246416696471139	18.32423757853828	18.659640858881	13.503532872453876	21.745395442720024	12.326274730352582	23.293895662578993	13.052934618385272	23.44908242558439	15.216808623704605	11.715578617290673
13.200000000000001	16.17271593459918	12.822335936174785	21.346491769370655	16.86489412498467	11.449942089204926	23.142808885721866	14.43251010807653	21.201899631790887	11.409086396435821	25.927606128619352	14.419382852315879	10.306951862025613
13.21	15.90077582666233	13.593081496698405	18.972487934577444	18.395400383041025	10.371715928900398	23.363999725028442	13.540642237783679	20.69531757462435	12.29044335715854	26.11433596311237	15.342810188022508	7.335473968858974
13.22	16.868626878050396	13.782813856441745	17.039742826339054	18.80370217412564	10.716599630103374	23.093567039614538	11.474621582789847	19.790828163347957	11.980463163753393	25.543943861007275	16.400729849029528	8.255394750848373
13.23	14.464034794878641	12.236741681241105	18.946015298011584	19.450649747499497	11.580257669156751	23.974211272648375	11.883524461409376	20.268546690952196	13.068168444530823	26.294649936886586	17.423258514591566	8.435379640715169
13.24	14.719703874779432	9.85003460932604	17.84049815704588	18.988599723232127	12.798215714894777	22.342483233870936	11.700885234591905	21.449613218785053	15.408422089833794	27.501326154363216	18.719779852257453	9.360960771772643
13.25	13.62809858215098	9.62484639664987	17.82170972085838	16.995504240398407	11.63501307167147	22.050518625869074	11.124272123622392	20.108233337169455	15.302730766241746	29.473964055732942	16.69657032272942	7.921660632664033
13.26	15.783239179185218	7.916500807888674	15.423465851561263	17.397300532575187	11.214390657231153	22.074332438774288	13.177290567362029	21.619505627926312	14.066395882269928	32.194325743776176	16.732541892225445	10.040069146679398
13.27	16.527815617832648	9.572066990097424	18.113825961027622	17.177247721642647	12.238131427478088	22.5797127642868	10.821478957073433	23.34912886888502	13.826482386620226	30.977673660984443	17.46795114257727	9.514797109533264
13.280000000000001	14.826776744839648	9.676991949728144	17.59444720791408	16.963724564103472	12.44950949217538	22.70851781906346	10.479377878081747	23.273363073866754	14.624882428496484	30.48502756797002	17.271003292004966	9.873164162446962
13.290000000000001	14.99615634035252	12.228515825402347	21.07662740998835	15.52135957041524	12.536910067957386	22.61570410490668	11.417131890576549	22.65070975460264	13.858589590499427	31.35263111111115	17.38596236179117	12.077331913518174
13.3	14.9254105309902	8.62596059933028	18.711369080525103	16.982274427633786	13.185722035054509	21.706215193492135	11.860643367384515	23.06652215932791	13.227729196397824	31.113637440210315	15.79870693494722	13.214609351528955
13.31	15.06260244937637	9.176520365279789	18.091214567962624	19.211450597533137	11.131759157364218	22.22319230903953	15.02230817620387	24.43195982101662	15.619671167646505	31.285793869015322	16.011350867469208	11.50606325228159
13.32	17.312517523306994	9.67041207783135	16.196559040312707	19.71191977397312	10.209128432444908	22.039064260284146	13.196856109554913	24.607713922473195	14.347200843273447	30.96075791429684	17.35225031031664	8.028656445830135
13.33	16.094678848006534	9.687949025880146	15.431383387945436	19.256623764093664	9.860736712160195	23.24175736448339	14.337641675339986	22.4947601752772	18.018783441009834	29.704280939074252	15.893864917731241	8.769000131066989
13.34	13.595541191157984	7.5544878395928805	16.542512862755427	19.839263020300024	12.12298024669727	23.108141602307214	12.95067400388205	22.258211588386153	16.089395906914255	28.47477315977975	16.51075170649746	7.057109184230993
13.35	14.515970393354662	3.915705352249095	16.521127344762096	18.693382981144328	12.175267684645979	22.76570235501794	12.424613241747137	21.048519610678007	15.077542647044632	32.17502716439485	17.201043094198003	6.198212709026165
13.36	12.922011506748454	5.275869017231993	18.49403425015699	18.531721005625506	11.613235350686459	22.96055413853144	12.538818820776179	22.805006424563462	14.147422206606164	28.77844461303381	17.00893846371024	7.151685261121424
13.370000000000001	13.015198065080488	5.788894467707069	20.605967908933955	18.258175844192174	11.147986618774171	21.657327049798052	15.067636931346419	21.683147914304943	12.932940320990701	28.014050118661977	19.156875960391023	9.00646418976256
13.38	12.840512037119119	5.168048877123437	20.89683129404101	20.501551456000364	11.27073548903013	22.16106001099125	14.789274721460307	20.359640175269373	12.866078783191263	32.13329304305922	18.587559401319147	10.051175730087174
13.39	12.814296587825947	7.317834705086495	19.82976789140234	18.386871057829307	11.89305639694297	22.09006681459434	14.484728461086748	19.66173298923684	11.35010470967367	30.13574639526879	17.442538558834684	9.318650613083282
13.4	13.21639474527256	5.210770524783521	20.407426239627544	18.142220943567583	11.245005106033892	23.184957452686174	13.27258215985682	18.43757975339513	12.683403858753017	32.609668171676056	17.11685670550682	10.439986032108129
13.41	10.951395638634128	5.333853013026963	21.46628956861165	16.171085095016945	11.898987842715881	22.557581144067658	12.137693011098268	17.45064704081301	12.328798501319186	31.32527104151494	16.731665541617755	8.69349439091476
13.42	11.128300607491633	7.86335486623656	19.044741222612103	17.30277584865656	12.139839227461703	24.271538975102196	11.625862590902463	17.30507028385245	9.905812812788735	30.993477726676417	17.162105697607206	8.421508468144456
13.43	13.692122660662413	7.588959358846921	17.133757835923237	18.320082014481095	11.753936999099896	26.95336963613999	12.2203115692464	18.59104499543855	9.393265830328305	30.637488705955313	16.271234733067967	7.508865271543337
13.44	13.716545781144081	7.767396689892765	16.64430124881614	18.307339635749987	11.564466338905042	26.536304796442277	13.365885304344966	16.182031554799728	10.740258238970187	31.144619419160318	12.443678500816839	9.86166934188924
13.450000000000001	14.241512604450856	7.643476347715429	18.509025155995076	17.914857294963745	10.408649977002826	23.975201830331727	11.71973823983696	16.981078768902858	10.603554339503406	28.976541296985733	12.25321405814112	8.038018166150946
13.46	13.13080354476143	9.46682777857488	19.141548006425964	18.76112909616941	10.03102369645891	23.909516239588218	11.144930284349991	17.267073210402035	8.646851282426873	29.968871047819455	12.723628801120274	7.970389094413783
13.47	16.276896099498966	11.182138451917803	18.458132233239372	18.741853312828944	10.533072274356392	23.879195300753278	9.756061832014842	19.489680778636657	9.346444883818188	28.07004615250406	11.725566339391724	8.0306447510735
13.48	15.858326998552386	9.128087509026964	21.371199441984082	17.658772324067947	12.549417224987959	23.540526526901676	9.920806999220888	21.59838210500247	9.12510258767495	27.219775367740947	12.03295873169919	9.491984702002638
13.49	16.90992822485445	8.063768090393	22.11901272846303	18.20265148928236	12.104299242719396	22.723467612087475	11.483750434278146	20.5086952529551	11.391864183493185	27.597564740354482	11.99058874149159	10.266960776058204
13.5	18.26875644324022	4.962240388862409	21.078793839982108	18.148535432434507	11.377990851173525	23.782747018818284	12.23000170170738	20.608225834514553	13.919518225736432	27.914770135771164	13.55148362828593	8.961632704324952
13.51	17.177040078752093	3.6916023810257106	20.08439546487317	19.115403463865455	12.36971906936889	22.243136865824344	10.670970435948988	20.861573177650506	11.270289544929197	28.730029498873133	10.752840360707756	12.168460621942526
13.52	17.668821077941292	3.1242739217968696	20.763371043895635	21.468474250825675	12.557347050213634	23.502099816389592	11.273817869986953	20.06760611221821	12.92119812855802	29.380457852153373	12.109483577805117	14.328045408610935
13.530000000000001	17.3857961353378	3.80846487205067	22.119133612377016	20.22874979265996	14.517740275242977	24.4596771111137	9.988962732738702	20.275140133377548	14.350374943251994	28.7133187118438	11.995139458792941	12.367846808809787
13.540000000000001	16.621829995651588	5.49990962627634	20.529608654457576	20.655705193533787	13.612789826185008	23.92490740725262	8.911593385257644	21.802983938057967	12.450534704520571	31.324102381983064	13.823362466000365	12.272220778739658
13.55	15.69448343149213	3.4813314578744503	20.807749590397894	21.30961251995214	13.974141252821946	24.096454906248663	9.86957910372329	20.172307121071317	15.404190200458942	29.939269678746786	12.25346801635808	12.965101228913852
13.56	18.295204184571944	6.335289546903422	19.40072129902043	22.03127231568491	14.095282761490392	26.32239057306158	8.71150893091787	19.52075505631977	15.789614349808575	30.484619665232263	13.195775290627564	13.232332610336755
13.57	18.120026412657165	6.728654818614038	19.41429107307292	18.209274394790913	12.015343667933077	25.42020735853128	9.828443915423007	18.842113386220618	15.474273557551196	30.110244265150186	13.316736935248004	12.165412083177578
13.58	19.168706582131605	7.407463073604436	20.36524656227358	18.91155683173907	10.870721442726028	25.251824002372697	9.55833002106116	18.00803018077433	14.975564830356044	31.23407635957403	13.829939090251651	13.21388398099822
13.59	20.494141086917463	7.135384466182616	22.363657326240116	17.766721674783305	9.964615598540757	25.0066270685765	10.610825359770956	20.226159927577484	16.267449847419932	31.06411497194938	15.491111395509886	10.738788272045436
13.6	17.43670801307389	5.980826943045364	24.056991464888426	19.628157956332647	9.229174538901791	25.27972738360636	9.0881509193298	22.038973575120117	14.257047833375072	28.911251201399807	16.618906716895747	9.54612334472758
13.61	20.00985985679295	9.723274401355683	20.87058239399954	19.36740414650464	9.387067030398345	26.02058702429655	7.919059374586887	22.31536917317775	13.713732368549815	28.512084423201888	16.83626270159067	10.113817404075098
13.620000000000001	19.142385818829823	8.09650749109503	21.003297181358384	19.350702023654087	12.743046284721922	24.0125938932893	9.19149411793118	22.532547487213556	12.004881888438183	29.167744507454476	16.967038627606247	11.791590107631901
13.63	21.72080958070956	9.071270665890554	20.25899216420697	19.660061204430882	10.538459802965317	25.986772529958813	7.418161222535839	24.108196778836383	12.59020402312184	27.248784035020226	16.366715368595614	12.611670267174494
13.64	20.308644200144087	8.773777808978515	20.375987630925497	19.431089345440007	10.481301321208756	25.254477883689706	12.037801479324473	23.423738002075236	14.277140004632166	30.157244130240834	17.41570521173432	13.438247744615554
13.65	22.418431991441395	8.072159422711605	18.37882923041862	21.17611248222423	10.009705892555884	25.406408620802328	10.706326720277605	20.334888978530955	14.36220572787107	27.79407402520883	16.1789677315461	10.38182488273532
13.66	18.539889805788565	8.940871039493501	17.772769970054036	19.76066370132808	10.797787149254262	25.479406950147784	11.534202175746335	20.492863655530506	15.229487217417965	29.803915690463125	16.36657072818536	9.713151452614058
13.67	20.619691393880657	8.330451434177224	16.983804535258976	17.624115968041817	11.505025214220522	23.750088536142545	9.744978598178836	20.779134765031895	16.08843085392348	30.28602778132936	15.098894348990015	10.218101348998733
13.68	19.255373777218185	7.025424437630753	17.695456004035652	17.6382045508127	13.408017124224754	23.090988617059686	10.266386678085476	20.696407811138986	14.767789318981857	29.090956499679237	13.792204468878783	12.410990851272958
13.69	17.456764688120444	7.897231784667552	19.053797142083397	18.59226794919719	13.101193967785367	23.57568074717861	10.884660298142375	21.518612492812068	14.690716713795853	27.993918342605422	14.731270241109351	11.7385964780497
13.700000000000001	16.748323176914163	6.105032606084057	21.976333400797074	17.84406906941952	10.670321040267332	24.240455856398828	12.722782975368476	20.70893841753786	14.755793598534284	27.410612136765142	14.144686363235786	11.19647798193819
13.71	16.53978339927146	5.285519696353482	22.39026699825413	16.54118630976813	11.687480895768623	25.94415226649797	12.988298774641331	20.56542878767652	15.027097347353832	27.378732636191987	13.955212074804503	9.905824690636447
13.72	16.446543055814978	4.679846059037249	19.52841063525558	19.909384268430944	13.755258548824983	24.123461986412206	11.391781716511005	20.525504960930597	16.15989647709982	26.933846190924324	14.2585465643793	13.200953981062398
13.73	16.86746285704654	5.9683440541687	19.773296112905303	19.795933124985908	11.94173286730946	23.133482044312586	11.629689451955008	19.323870782710646	17.172543176569235	28.072030143874045	14.350807594268273	13.78912130757435
13.74	16.76456752983112	6.47534986211227	21.236990538746003	18.387361600234364	10.477943295666059	23.551774400297973	9.975281986287829	18.002228062945118	18.287448937647667	28.05297362003674	16.057202423229462	15.386321353924991
13.75	16.294362689746833	8.872141074783624	20.747444884532783	19.662263357889582	11.742478948845967	21.80514319367825	11.025593725463516	17.645779009883388	18.15968234906875	28.087593091507497	13.170541589919546	14.289283864886968
13.76	17.048300408936754	7.1903114651560776	19.944434317066175	18.9279496050479	11.438722396010245	21.99010537516016	11.86846357044741	17.1657951327645	15.625488242502765	29.16648302788911	14.593175245166286	12.579858994362741
13.77	16.524438703523654	8.052010740173412	20.844188234993805	20.17916769824895	12.390034341644853	18.783434865216726	13.019108123595556	16.95885559111269	15.38486971275971	29.401901665317425	13.809204897533537	12.251168822331854
13.780000000000001	16.95478167198574	7.559532568642522	20.582355638312382	20.26319220015461	9.73520648653054	19.599206376513578	14.076937637975035	19.80156595133185	12.663566363244714	30.686416963012093	13.480256415144979	13.419519023428267
13.790000000000001	17.903192414239026	9.528011763700697	18.615342400553683	19.034463910406966	10.382916159276832	19.219360013652356	14.00910789493755	17.132893967541623	14.435045325555079	29.48246998843032	12.861809191367298	12.052990883574813
13.8	17.41667401802132	6.188862284569511	18.114287569997064	19.321416626941286	14.310771988194906	18.854549032855644	12.971525548280459	18.012183134075045	11.802002306488015	30.170943039872224	12.584796328950423	10.828408422317668
13.81	17.198563020358222	9.069595737686841	17.653216732176716	19.56734460160445	13.009094072655968	17.61435478630573	16.061730498998177	19.26692467811018	11.31609639395828	28.705926811861428	11.25382669377767	9.54580891263107
13.82	17.54016682030552	7.311392209667551	17.703280947037282	19.61047042600459	12.923115160475014	17.291290206021962	15.040709053013853	20.113544169978407	9.714987013513216	29.43854163289793	12.256052338404873	10.891266967430601
13.83	16.837057897786643	8.222448000454515	18.530514769911658	20.054152522536107	11.552424751665459	19.91396078293198	13.94951781435245	19.668330087889174	8.713657117254252	28.923326332723107	13.707672343482061	12.580823514785791
13.84	18.113062192566137	8.69511504787203	19.900445541737692	19.036567219624366	8.816599085155833	21.861250921242387	15.894882198244101	18.982537928047105	11.87357382264932	29.70716147338509	13.667915082890001	16.202058463465104
13.85	17.922565849645423	7.481125240590822	19.41863184568197	19.214232773838514	10.309942948923911	18.83396246129472	12.248850900220626	21.317772779620906	11.931972468169958	28.980643541404643	13.260596903697977	15.191815923753522
13.86	17.32451941875333	6.409801972946754	18.419455758146864	22.048659817847053	10.243095382497048	18.74127126626424	13.195244945525745	19.617359296084217	12.755754854154995	27.394824341811486	11.523785873242316	15.437374788439978
13.870000000000001	17.191100428897098	8.31802966468131	18.319661053013995	22.609345445173588	8.802778991738016	20.36649621352656	11.9351319437139	20.692291799590002	13.987238403839259	28.936903807575213	11.803917066239089	14.431472533314578
13.88	16.14077407435027	7.763510195593652	19.109911986826887	21.46965830280797	11.708719652908645	22.149230514896075	13.726394356075112	22.23956829779895	13.494841795789723	28.388017615720578	11.993996152850519	14.805827035744558
13.89	16.69719865262466	7.316587488800103	17.679879046589086	21.973197232722583	11.829026163216023	23.259520778479104	11.834713804649901	23.023372378010464	15.32083065908506	28.785149651921177	12.030537286960806	16.028129371779322
13.9	17.0348531137877	6.505233893425692	18.321985471855225	22.60218572323983	12.301684796156673	23.39002911555023	13.279305785513337	22.2946324043395	13.67312465508278	31.395558400492703	10.853502901988383	13.830848533852214
13.91	17.546184357795582	7.169361910128638	18.066903790840833	21.07620542896916	11.696287564350495	23.40910185371034	15.451584298476334	21.399948617686135	15.103193416777195	29.872334642889015	11.71412318745715	11.800100904547289
13.92	19.92308695416505	6.788128652245229	15.328999555221834	22.54061347062207	11.90593136585949	22.457261308580662	15.321384318681634	22.2018704327684	14.430178207891435	29.68714013468574	11.727812114708774	13.840342718793472
13.93	19.15599202574873	7.520579317028718	16.601734999124876	22.679564221435985	13.133399305087716	23.454256924434944	14.873237435660757	20.789650924196508	14.08780141486702	28.56515304209711	14.297402446313363	12.310540368402846
13.94	16.14100137755467	8.449485264161808	16.49330594256417	20.510459093999707	14.261762776540166	24.714921134117656	12.825287072644098	20.864671176984945	14.731216654511185	31.144388504871912	14.830881039044224	11.490128187739161
13.950000000000001	18.210083082068998	7.385784491142123	17.30822809558052	21.883647369658984	14.580378045264005	25.134727647655073	12.668137306182896	21.317505974003637	14.3607968838861	30.600224111983405	12.383288420501925	12.886960494847704
13.96	16.816575468012964	6.41870312954913	18.111794496631244	22.423357196455797	12.863025012432944	24.681472921071098	14.271486183019219	21.074005310782713	15.013373325298115	28.431747489814292	13.333811321224134	15.870835362930501
13.97	15.526969253728652	6.99721316785437	19.289800891741518	21.337567021307716	11.622564686136158	24.53087212102642	12.192742878198349	21.696124818099932	16.476427347367053	29.900552046376358	13.503242605400592	14.124763554787135
13.98	14.862238742177276	6.823497633555047	19.865729232142936	20.993857824361683	11.213295142236083	23.5651069210078	10.905248151914574	20.473574799590942	13.849846038693904	28.867954385043216	14.301483168074043	14.200637194642166
13.99	15.151119630065782	6.076784109631298	21.425527505099044	20.188892676353134	10.185405266847106	25.463636006516428	9.976276006233748	19.993674060791605	15.5891340149449	24.98392326404654	13.148195574901175	14.071525394348336
14.0	13.89398532075964	7.1702253576383	20.022600873112506	19.770128935992798	12.079204012632031	24.902384080084968	11.17572497964072	19.69082562675529	16.987135909202777	25.60730709951151	12.132616531166496	11.918017901415858
14.01	13.570403597062368	7.037954287750461	18.849787635782626	18.749156712142852	9.362246667163186	25.63211531472923	11.336766874376016	20.71631535113601	18.28494129560168	26.917782409977566	14.157933151680393	15.324566039222518
14.02	12.634380348154863	5.769684272465133	19.65862548937129	19.191037539558362	10.633204777239452	24.489818501162716	12.055384325190362	16.26262754003267	19.257540865103767	28.830042258019816	15.0866238343604	12.790097683025667
14.030000000000001	13.255761640816583	8.63922763919232	20.741023970391296	20.23187027605312	10.573359082739188	24.95660058429395	12.312248834708086	19.505799207426904	18.20438336292876	28.538287873816518	18.41847553510237	12.024933355406173
14.040000000000001	14.213476276249246	8.57718485832555	19.5154779816924	19.865220317699414	10.420796804625985	23.632283305410297	12.890694036717203	20.689463484603902	15.517898798935303	26.539028025976673	16.48633119739307	8.499669486113572
14.05	15.745718388033803	7.53700309049138	17.354706798418803	19.88934555506737	8.108406596867356	22.820830950314093	11.529538526904648	20.73522310225926	11.663236105994628	25.593845140688092	15.068819296739019	9.011901677367927
14.06	12.538475459683063	9.19619636361492	16.622234348644632	20.443326018275833	9.149064911938325	23.310147879840464	12.147808032835934	21.438631270316503	14.395751016957618	26.156653909392826	17.637734108026674	10.636637353392992
14.07	12.48025172729911	8.943617831537424	17.7002594959143	19.43673400879076	9.736447705124544	24.146396500760098	12.680403096982602	21.592338980332197	15.822470780661158	28.746494672356757	13.9861600341294	10.535456410941267
14.08	12.506386041536793	7.133530096930434	15.316023184894066	18.323618103675493	9.536943752454722	23.80489984507282	13.939980229437417	22.597118410820986	17.30317813301992	27.870373195829917	17.15889225837789	13.933280132966171
14.09	13.381984791046833	5.8508684100347095	17.240587228410686	19.222839110939983	9.51479428167524	23.483903744819504	12.632631923420501	23.133420453066567	15.921127940690006	29.043736187647003	16.237199091123664	14.575151644594015
14.1	16.64532609235867	7.169515373098893	18.592674265395377	21.282214397177388	9.401238532543836	23.09628022829173	13.848771833161736	22.1589687507998	17.618031278698695	28.730687763242237	15.95494886559117	12.477306462290441
14.11	16.21830638488744	8.440203847436099	19.540203435445765	18.898410439585163	8.527880398559816	24.579872000844016	11.907488556736094	23.474807202100212	16.317771475761383	28.30821893444304	18.0129751495434	12.12255836913261
14.120000000000001	15.678009258536191	7.69255913164191	20.48281796103225	19.27126068538568	10.336118644923316	24.816216201066407	13.57924825619054	22.530110473409763	16.158889083582896	29.27950219774207	16.088102076022196	13.87936553544355
14.13	15.728947661873242	7.449219580814453	20.671853171908555	16.963218321871377	10.807142491850554	25.32699852803259	13.028485102990935	25.2439000753413	16.233711440907364	29.534701490976605	15.474765923584377	12.7228549148029
14.14	15.611570804833558	7.532213706328004	20.494605120563527	15.943172418811724	10.992457576950528	27.814628191192252	12.818718986614629	22.730144029739996	15.745332803334742	28.863521970009757	15.104646993945439	11.464141376834244
14.15	15.724647460282112	9.530757268463288	22.116215844375944	17.72835959405316	9.45960778203797	27.2829753926773	12.433867285122188	22.043163059179022	15.888498267980339	28.25177651827051	16.553823211501115	11.591575226662396
14.16	15.732741637422565	10.397127008156417	23.3218819669007	18.30767263385224	11.756638108334496	26.027431165044742	12.343591499508515	21.659370110066487	15.539541126586686	28.96703819710965	15.79423470077018	11.846817080678687
14.17	18.251898019441732	10.64715507535594	21.912621672272454	18.91734922405751	10.109075001416642	26.67543672878638	13.21804029566706	20.93282320714036	15.357623809712175	29.697813386461675	15.431518031180268	12.924968284963184
14.18	17.326296709147957	9.222005702257029	23.682994110319314	20.484502773524607	12.158340113056692	26.409877002918247	13.284978763209692	19.7300934459997	16.067878344081528	31.706114866491166	14.778275931271237	13.83260326333787
14.19	17.363327956084614	8.372193000250618	21.260290671042487	21.64203791832354	10.841523694039498	23.831932401702222	11.462724349532984	19.770082613227395	16.2636315246599	28.204938004925154	15.263165983195401	12.256955185407017
14.200000000000001	16.30045093006498	4.2568470080632865	20.252553451313215	21.758707410054377	8.85414245991242	22.38263456334807	10.41155234846344	20.532469947748833	14.726698347038539	28.456062963092922	18.26168781507371	13.896576809665827
14.21	12.141104010020541	5.569014212309412	20.240151872152172	23.00257804427716	10.251314664463541	23.44154547052858	10.969777460362705	20.83338875577833	14.679471455683407	31.319749494353626	14.027908325555563	16.00699233134647
14.22	12.107593967030892	8.292308533020647	20.15677623020425	20.438000033691132	10.41501921427282	22.768977146781047	9.227014381042157	18.47243870027185	15.120663670584534	33.012893861590726	18.184888735952942	14.065323773008911
14.23	15.149634163603995	8.756569419440352	20.290447966954176	20.268228491883917	11.352501642275293	22.76850022360438	11.11440343170569	19.287061584967763	14.391878179869293	33.69820715733243	17.09079631236129	14.979091610315315
14.24	15.434992729527483	6.192193856856915	18.624618209511414	18.487987231952022	9.908293473653242	22.56483996048731	13.819431870178944	23.061452406586216	15.150421143787378	31.452100403791217	16.515352443092567	14.374727605111048
14.25	13.46513754921923	7.625428284060853	18.863947187551446	18.2138041487551	9.996258118012221	24.333373881041705	13.787767592874319	22.602925639743248	16.502463676027098	35.06017072076204	18.192520537617483	14.085666565893952
14.26	15.846088757189424	8.969988343721717	19.759782267084162	18.01666510560306	10.891617058934093	22.73340176068802	12.800196785592744	22.641089785576202	16.020445364488413	33.58082000423544	16.29241835620863	14.290518487044721
14.27	13.847874366335121	8.520587945353881	19.790819684190485	20.60431631871814	13.9202605726413	20.976937543455943	11.871870797511185	23.203703800375553	16.336228863719967	34.679178418494025	16.135694207757748	14.79522583291091
14.280000000000001	14.645676479921205	8.31399151159581	18.19326088475172	21.622463503564454	13.645287988914202	21.24057070745784	13.33215755319017	22.35520881422018	18.09425023705374	31.36355003451168	16.047878465163137	15.134179726923941
14.290000000000001	15.107033724006602	6.659125654195564	17.531624920558382	20.173001755177037	10.425718196778806	21.465193559421063	12.96516121032368	22.57991249669016	16.30521802276832	30.883874529010377	15.697454221407952	15.401506732421819
14.3	17.16996548241316	8.037896081847714	18.973491487038626	18.62828247765627	12.19806743667368	22.7519470401881	11.109480173172576	21.444434439781165	14.17829327811086	30.212631637758623	14.514759944045696	16.372361685165796
14.31	16.854837961010837	7.1735833343303	20.04331819685818	19.413052977368828	13.045945325127482	20.644497362087083	11.893711687326597	21.398142018757348	15.289312312423027	29.55118785940793	15.746399510086086	14.897378146018527
14.32	18.41280430931069	6.78458669766472	19.9349932162834	19.5720762834579	12.947020047981965	24.442051563647134	12.298541315835752	21.435110296385393	13.53011919063592	28.164677377469218	14.485457905278798	16.53841720825184
14.33	17.353405662403915	4.563928715787917	17.933828424556577	22.466673153792527	13.467775783844655	24.627589823117496	13.025685957483924	21.276966631063967	15.52835298808436	29.772495153256138	14.016822382785529	16.768517285268242
14.34	19.754957363530618	6.454566831767429	18.107888155026505	20.014237141429852	12.787691226401693	24.36157161728416	12.75230954428122	20.57015111170388	15.224339054601401	27.666016922653416	13.099713734381409	15.389693435306821
14.35	18.92657317739608	8.395380841684565	19.074557289997085	20.176900782370712	13.13684323316333	23.15221820595112	12.307463550299465	21.24813182083379	14.153408453447462	29.600142770446254	12.555324525213605	16.44996292332447
14.36	20.648402644790902	6.831801319254113	19.089177947121495	18.338108853057353	14.01354078355341	22.657637010808497	14.211375173145573	20.785193840601718	15.818625843440993	28.39789117174203	11.702090154158492	14.373471822588668
14.370000000000001	20.077824429924227	9.257816538231491	17.35563969444846	19.559943600787516	12.857001338566207	23.85302164271769	12.254083761220494	23.33369243435027	17.243991861220966	31.84384318216715	14.310436566467438	15.946913697888625
14.38	17.852110261880345	8.268380280152762	17.277162109282703	17.643129116548074	15.889944140085328	22.452564263441218	13.443958370592911	24.133788003554578	16.50102524283435	31.851459058947352	13.644330673208685	15.925350554088176
14.39	19.82164387897873	8.821319735671517	20.294870291489367	19.56174527820785	14.964496076889715	24.566724911908622	15.916790155838964	23.97666201354447	16.67354129593406	32.97941822697047	13.916672778725703	16.023457398270647
14.4	21.46797017501027	8.796957183666628	20.106012186226494	20.023282856777385	16.041892182676147	25.654860252636954	15.322077971309335	22.02362110616859	12.15085017060121	31.712701855641438	13.631492439563903	14.135340422456215
14.41	19.732089199673304	7.880167931690326	18.225588625200388	19.59741858688834	15.421733795429885	26.223923919108806	13.300091751198277	22.552590222445723	14.16326725811292	32.40695777585145	14.982701658407228	13.87226786528324
14.42	17.057697050479135	5.182275231395093	19.709866684896692	19.19372497966523	14.594840352351175	24.484268857207038	13.741454485080032	20.676563661772576	12.840196207556163	32.584312500593285	14.281229939371988	12.996108658236217
14.43	17.045948375009356	6.229065219874257	17.76893028474072	20.033142141636144	15.706108365009216	22.503616778813313	13.80412600304092	22.613804960353264	13.187643232568112	34.268839364286784	14.610597728417533	14.773828939950416
14.44	18.790408809189845	6.843856582775828	16.550059681289397	20.135315229868194	16.95385018544491	22.018473009240516	14.24530012004173	22.041899289929695	13.06456976919063	32.89260517971299	13.87738692467052	13.130687053914034
14.450000000000001	19.581486073287522	3.818788702790195	18.721734817182952	21.56119962180276	15.353003315604841	21.53093156705381	12.669812835017924	23.010275895933578	15.218242210317149	32.391417204322835	13.70759406071679	14.205822034927635
14.46	19.51887925263293	6.603691363938265	17.802799092581292	21.18593980658527	13.06442605569637	23.41734652475394	12.453393302612161	22.202808443265706	15.436277053431562	32.48345624358141	13.148072546153902	14.074107967713589
14.47	19.187167191128104	7.629780974483918	18.6446674636006	20.141012334585053	15.372656638220233	23.185364209375546	11.960901276062897	24.731314903150235	13.362070232228339	32.76559557822941	12.958022391926463	13.35245727994458
14.48	18.160984200382956	9.470628060627226	15.502685555118092	21.840100007329028	15.198856911226096	23.77471354324602	11.325786306928864	24.516865780572758	14.72895294561964	31.90858875878866	13.116088027828496	17.04999264186079
14.49	18.844320572835525	6.578408215933479	16.962866056761243	23.208054952969462	16.79187839611948	24.734761221440493	10.526651637406417	24.155188733667714	14.779656256798543	32.19044082304997	13.400136784122134	15.319953078982286
14.5	17.5746264228656	6.0067250127824545	16.965307520131994	22.99541933679407	15.179533014842196	24.972047423057855	11.92483446835948	25.463306174168412	16.823327452863296	34.432741679071235	11.592785315539837	14.628324820428862
14.51	15.468159561269601	5.097642203945576	20.209017629097897	23.44057146130166	14.631832552087463	23.99974536381202	11.551349087127067	28.53209290997996	13.871801831786284	32.78348819701616	14.136267448636707	12.448283243098556
14.52	15.031327768535512	4.983293876876533	17.913898391412758	24.74053818016891	12.757722185595483	23.148610943142053	11.012598511616623	27.112858577520736	14.06633778329902	30.558921873168323	15.554658124146385	11.342862807939362
14.530000000000001	16.907034105227456	6.6991121930456945	16.920711924823163	23.048498042281896	12.525847616823725	25.522617641815557	13.23358080289594	24.918437367629448	13.102460849066816	31.067638132560226	14.533562117891206	8.612895073572375
14.540000000000001	17.224688859429286	6.223071648841459	17.523128977599857	22.58746133956376	11.373173029152845	25.35887103886031	15.386247743759288	23.75768666015384	14.67748610804971	32.7278784879313	16.835216042822168	11.262635972829532
14.55	16.510551961184206	5.419768785268198	18.954423888690364	24.266267279645312	13.034713702430446	23.33896746292371	15.963231148830747	25.428432494850178	15.399136950359496	29.683703894873087	17.57156432774429	9.800757532339365
14.56	16.01380007266789	6.096085468265697	18.8059178224344	22.663021378413433	14.198047285247128	25.923109327924575	13.773654435622658	25.942342289140342	16.83714394694061	27.05056024481544	17.456594958071936	10.629696796106478
14.57	15.807471752521531	5.9610256000131425	17.537182188377088	23.374320273254625	11.696131117698066	25.38136161775869	13.444781454683486	27.661445050873777	15.209475899245124	25.998061169181053	20.914042371542017	12.25421680477438
14.58	15.5657398209462	3.357312824916278	18.740723101907577	23.200844636043957	13.554880504845176	28.21952857556154	10.611471865130415	24.50076445534714	14.407480352781398	26.49208875715419	18.38201316963155	10.86657209880624
14.59	16.886849022598195	5.327919444231559	17.455684827106488	22.756456218575554	14.962802568688717	25.248597065802375	12.292793826534188	27.0763156188977	13.60167419405184	25.28015344456549	17.967980894369276	11.572974289815793
14.6	16.488923237737815	5.24593887565505	16.510916455260613	24.27545816928122	14.175281064463231	24.17647872136761	13.083648162031466	25.039119057956068	16.089092551372275	28.270579038469247	17.618434220795027	13.78761882315465
14.61	14.694301503913072	6.615546339507941	15.822041185499653	23.566190756179957	12.907925769382071	24.258122526900404	12.944727726443718	24.505487096434944	14.947306492294944	28.005149435049017	19.37182065852831	14.789788676227477
14.620000000000001	16.88126823894295	5.775705493309283	16.885641349191655	22.55116182634345	13.97412408710205	24.740091415528106	11.24628120751137	22.82074502909552	15.36306016250874	28.76744453425597	17.711686076288554	11.454368664831495
14.63	13.998901789749555	5.8092832989255	16.679965359243123	23.40504387925137	14.940920421660461	24.39767677855816	11.345525612238312	22.420288845153966	17.59927019002767	31.652548634123974	16.222075409616412	13.396746609364975
14.64	14.995716163873881	7.536483718986908	19.761830928451634	24.05397511497482	15.142979688882592	24.416366018402893	10.35966819198376	22.593431115893985	16.33574169142265	30.754586362216447	14.68376214334077	13.343080517807001
14.65	15.790206904353283	8.24580982235453	21.380478973377055	24.765904675642755	16.405917949906623	25.075457963022753	8.739318075482037	23.581291465847983	14.173434869522627	30.676904229558115	13.651390748022681	14.422983989150227
14.66	16.259545990117548	9.403846117781919	19.941803975559793	24.302361855358917	15.956717626562101	25.296216613748587	10.077822075563795	21.512464768956182	16.27117517538374	29.92257541886452	13.803221945979995	13.08878094991556
14.67	16.163184475195237	10.266579773078174	20.039604709032723	24.45924067448233	16.47372003115999	23.934619152046448	7.726741301387597	19.11667935468978	15.492693034984708	30.047677204698832	14.343503750971683	13.612881006756375
14.68	17.74947257280279	8.429253212624214	16.94007268081808	23.309459082297806	16.289260776835736	22.52558656574698	6.500930561003418	19.692758042074168	16.781167731412964	30.138352701839974	15.475657257584343	12.39111438136457
14.69	17.275703401224376	10.127379673337035	17.71002841362682	21.567337891882886	15.83236970205297	23.682629862679693	7.72519337861756	20.658304265790708	17.65069805949222	31.58547513326869	14.887711612463706	11.231743682448199
14.700000000000001	17.54095191312762	8.416017548083001	19.015665423713504	21.869566610284707	14.363152946725346	21.551298133734406	8.538857002140487	19.052504246960265	17.79961369606878	30.412213074624848	13.754433701494937	9.750718880879903
14.71	17.598414448263153	10.082569515436289	20.104134187048672	24.575769389302078	15.470491227759803	19.87468782012673	7.302403184127693	19.422984521715755	18.67354636658966	31.708893602720167	13.672401235658628	10.153314322495568
14.72	17.506967623227986	10.471751104486573	19.733498885814466	25.63070731326097	16.672366091060024	23.697167527620923	8.661636726917356	18.810861514743298	18.766605375289004	30.921205355409477	13.007648519912683	11.14473290433594
14.73	17.808867109526087	9.611736140746316	19.800035512082165	24.834294401588338	15.501366205798007	20.508162186044178	9.142478610181582	17.114601785214163	20.54978283816016	28.83067332499097	13.14919924748113	11.014230386165806
14.74	18.502173114283163	11.725900715809207	19.033112593475362	23.639862801559797	15.221720703530565	20.299691688443268	7.775013294270997	16.443562350354078	20.319396623532636	28.152936541320678	12.716620898787763	10.670452215415065
14.75	18.25277644486178	10.459059049835904	22.40013525843701	22.974326761091387	15.115364823311172	19.896440646628378	5.401437997767014	16.25723398039476	19.198891797264825	28.586668740373128	12.296017465749848	11.29396763016717
14.76	17.70195011117745	9.998791570474946	21.439116198492936	23.4173455752471	14.87428271482838	21.58488988721493	6.757845037244932	15.271156472256083	20.411234397543407	31.566097664921013	15.341629662521544	11.522054757484447
14.77	16.648266519720558	11.309315176280949	21.00948584702842	23.989725496316	15.542064435128747	20.31762512400425	5.7119274975047505	15.959035580522395	18.277816351664228	30.514557029327204	14.643622458742739	13.951967509035246
14.780000000000001	16.38148772906883	9.92011083802572	17.036078201622036	24.871862172872564	14.073765108494163	22.745869974982146	7.477116376743677	17.70424428935635	17.18136942599327	29.917748982856658	15.240260568734534	12.414679816359632
14.790000000000001	17.39018217649542	10.120962323373007	18.36298790522854	24.530452528525384	14.007369202036802	24.688490066629054	7.077285396644835	17.216832978743852	16.133150252529443	29.12201664951622	15.635772245867825	13.053012868654685
14.8	16.99774076557871	10.099312987971961	19.876174078758623	27.575207909087162	13.106147437754707	25.850162172268657	8.059067718672958	17.95847114527389	17.052226524669738	28.607025610388234	16.260678056867455	12.696035525906213
14.81	16.463863557530573	11.554561876510139	22.86179086168775	27.553217058817758	14.589812961404236	27.140796260529818	6.438981215522945	18.045944404407773	16.41982983410758	28.100326854447466	16.199470748449613	13.430985814558218
14.82	15.7335441107416	8.637837364927565	22.05690236588687	25.451430303065415	13.697577605300221	25.85375235254228	5.024755190494844	15.588056264846664	15.371202332956416	28.567768864524993	15.79826973017502	14.605544009665179
14.83	16.130287802363615	9.366621355822547	22.15884355057406	24.788858374997247	13.535705032901713	26.558930957352864	6.105007693232593	17.88711594998672	16.740450408439298	28.846142093956185	16.627188701135143	15.059799445094646
14.84	15.586693015176968	9.035776640276325	22.463058168027498	22.625198861537136	14.623365095555073	25.312092437698347	3.3124661142693275	19.212172811309507	14.634091112471594	28.196748610295256	15.81744719216528	14.217515265637298
14.85	16.406634222633357	7.385667013741891	20.841155861192025	25.459833906632863	13.852556518655394	26.90626911021578	3.5458903769077925	20.18091530881902	16.562276472019647	28.03133570271402	16.663648939336962	15.93288595332475
14.86	17.286811543518066	6.297047144901788	22.396513303055706	24.87224030970632	13.97891455841713	25.30694281141502	5.351804831439594	21.887182269435833	12.981391719068066	29.384680811588293	16.64540088207716	14.807100935975646
14.870000000000001	16.3612661251531	6.656163544165842	22.349596122411196	22.80413288829594	15.112979876679356	27.50418203102344	7.075853333800781	21.419351689864413	12.85364861141608	27.941966720324636	17.10741654193189	14.84530670229688
14.88	15.614673630682379	9.062026988811443	22.739827130084098	20.47731299309527	15.390315292662866	26.347665217338108	6.255008866885005	18.254965339449992	11.448425183918095	28.958586928307533	15.915380208280068	14.234481236515844
14.89	14.596574848688773	6.241205236758777	23.030265911007454	20.74372895689001	14.492339405511567	25.321338611672328	8.67086241581811	18.226192297981257	12.009487924698972	32.29926328601568	15.306072937767457	15.747526928084843
14.9	15.803958219229568	6.938800583660485	22.84434386876917	22.061817033577032	13.671366942812247	24.801247844905728	6.813148766497418	19.034614991851353	12.599650554171284	32.57824954703629	16.603761270885563	13.88338295482034
14.91	14.635160785731845	5.1824202898783325	22.684270972139668	21.724490415158144	12.557772001909479	25.001378700029896	6.597332771983651	21.36575540493923	14.217890589832278	35.47629613319692	16.810565429107296	14.631316936358969
14.92	15.421274775934549	7.255798922146995	22.082982494817717	23.095555705063415	12.001256822081135	23.176614504381913	7.084495877128301	20.0878154124076	13.767283206755865	34.56875078740235	19.663248057756906	13.160832256040258
14.93	13.998772279352284	5.519749223007996	24.258504900428417	22.27203076055633	11.719405538729177	21.778996811903706	8.780609715098478	21.573773546007907	15.669274469747132	31.788803913279775	19.14625053712383	13.069202215453899
14.94	14.329456827042618	5.976688522135386	26.164115786751093	22.030712229485474	10.993905693877402	21.64001979404645	6.977088453185973	20.518036277869005	16.833201613404203	30.893020197217183	20.45807056448398	15.626201560129532
14.950000000000001	14.637003292560339	7.156181536880225	23.215576218602585	21.706361945048066	10.322463645514324	22.056179671434922	4.617954462708925	17.47957847387175	17.466602526335564	28.147062909130387	18.318715173039074	16.26164110478214
14.96	16.471573256256143	7.602417188560371	22.228664356809364	20.38051589119178	11.472993124779004	22.309275326694117	5.0932668795401455	16.889007948905775	13.63552048703151	27.627274530413686	18.494172227757133	15.681070501578128
14.97	16.72892579618	5.247842998890269	21.580533238986963	21.720950715050257	11.048649200706896	24.402198126613893	4.85923907425457	16.593733167505718	12.444523352512899	29.02132416953506	17.448424965659747	12.25069032147255
14.98	18.08802044053211	5.239242790907755	21.337590106162477	22.666549555921637	13.63762489671423	23.11623147015703	6.3730713113898885	18.87568026470924	11.658579629838073	31.835785444540694	16.86519420904942	12.771547505336777
14.99	18.086551020070534	5.669829667221238	22.39620930634835	23.196379728786365	13.664971526192907	20.609000659114944	6.666586056036564	18.195906719821515	11.041275978897065	34.31470289330503	18.504607835431532	13.238109439022058
15.0	16.837349880891225	6.497659725285737	23.836537648724246	22.90225376100168	13.660458530630434	22.10181336573719	9.71319889515366	20.09680858679616	10.723249457989523	31.370829962944384	18.39432767347796	13.91498447404907
15.01	17.54716195373019	8.02433286241177	24.1851874448152	22.823599454933976	13.24140339507609	22.701006053368936	9.231296662630255	18.482795042266652	9.854166165734945	30.62365195398035	19.441810942658034	15.95045448205458
15.02	14.948728393374118	8.591772678223455	23.840904919034987	20.542051056070978	13.842839680739846	22.686025771084378	5.454864416037719	21.209177566981847	12.616947628513802	31.01400516506249	16.64125578701405	14.871729362058616
15.030000000000001	15.902027905842981	6.826872966870124	22.411498926002107	23.298454815160454	16.102757970445182	24.885839953007633	6.073216222899982	19.685379302221165	10.96913945566394	30.40927747203394	15.32296223555305	14.452569382375346
15.040000000000001	16.387363837202603	7.147970139484798	23.234174578593514	23.724172171447847	14.423187471008985	23.93080378026393	7.307707972515684	16.491338069421875	9.858269572335562	31.260190820257147	16.094896768562204	14.87813870785018
15.05	16.716374110384365	6.891369279293869	21.6550514314899	25.17879665484254	15.046730788717134	25.162382410879122	9.119788585355979	17.774752973670182	9.76427812118264	31.891263749855085	13.164315027868884	14.07713343244159
15.06	17.152423707973625	5.470563133645548	24.097406837429222	25.139477871057057	13.309049072889199	25.010441016454294	5.708583519225512	15.944200602201661	11.306762459077195	32.78691185593796	13.871713505389414	15.256594200605132
15.07	18.066552347862732	7.503046606533949	23.682389211687614	26.498873477262006	14.193979976324059	24.22906419733183	5.907281927795666	16.487806668504653	11.855847999695804	29.556505322334583	13.750168280412295	12.844807083857154
15.08	18.803386107069596	5.295841310145609	28.212256298626944	26.57543824547571	14.27481441374185	23.745938267541387	5.549217673236566	19.55352677557019	10.59288556133178	30.17931789339583	13.094863494217586	12.70275888134866
15.09	16.96370151394809	3.0688499616409066	26.137770623312598	25.535408493619624	14.987254247400799	22.755988012188304	8.247921122045152	18.719216571454712	11.151843597516395	31.29438775954507	15.865638879595714	12.02758507034621
15.1	15.423878044691511	2.8923885382284964	25.878868333068027	25.421743593616497	14.956896157069732	23.993469537809137	6.116079142122043	17.454931345739077	13.07206421519086	32.89262891699162	13.962512474693112	10.423224350984114
15.11	14.593031619686377	4.247892726612473	26.40357742295634	27.520401920733775	15.950065857899029	24.61911042864404	5.055298978617739	17.735825111903655	13.778032075083928	30.96316857219183	14.795128034719983	12.605020868824909
15.120000000000001	13.515885425162388	5.271961090076902	24.840497890826168	28.72074701818385	15.232886687739503	25.988581125440113	4.39723906535758	18.027467473392424	16.97601957389164	29.051346825080614	13.37716673555551	11.265595614681443
15.13	14.286204725971063	6.160860677164928	24.104465218190754	26.779247046947464	15.906081311196017	25.59946980661449	5.364984797688797	15.73223259234535	14.807968590250809	28.781758291282298	13.56600982185396	12.530122589981847
15.14	16.161142426228153	4.489324408865901	22.41802364665858	29.105992295171486	15.424396054574952	24.331150686683223	5.530075764111572	17.066274205482866	15.21294532752485	27.843019086416632	15.682059751939038	11.596203458104508
15.15	13.87869844212415	4.817599361635048	23.65658787718887	23.52211772691595	14.275232356228118	23.17568534930063	8.0182320409647	16.393275276646012	15.36794434438405	28.4825358991832	14.031945200818347	12.203179035535582
15.16	15.06151636917861	4.288886717480506	23.24434954569598	23.819296674623	15.738887240902052	24.23486865927448	11.015465651629931	17.81765795278617	13.935652097906175	29.68328360965373	15.348958264651777	11.3370313800811
15.17	16.617264983254298	4.3394240442476395	23.400481697525336	25.76177410440075	13.021056550631883	19.904693570492377	11.48830444356367	17.972520697246505	10.904018000438056	30.382286837325406	17.038126315852267	11.717563787456902
15.18	16.169006547482976	3.3676840348538577	23.843792769328953	27.12456255670441	15.221559063386557	18.687976390934733	11.023587174155594	16.18442175385964	11.484695826420044	32.33319980811278	15.907232637809438	12.322479782851605
15.19	16.014042069148758	4.721266867613158	24.4627873137915	25.60819465477571	13.255997168711216	20.873202043353192	7.923174387892467	15.355944915531358	13.391411700692197	31.992115312796543	16.410287180556008	13.093076875880934
15.200000000000001	13.79328768762211	2.6796715864964535	23.02918676044864	24.337565903589077	12.778916667607561	19.602766368300877	8.595038905371839	14.971119181963354	11.958615734793428	31.005868945993843	17.632521698758012	14.193111858370875
15.21	13.946680781265945	4.550485442478648	22.76164881208792	26.135966440049195	13.545793585932982	20.99235787913074	9.297687237068068	16.947931583610412	10.988520591126012	32.62064855228551	16.99675366450939	13.55983741654998
15.22	15.527979748689976	6.4249421462324205	21.66822246097035	24.42414528727889	16.52426952404613	25.989129751489827	10.321848215992038	17.113862817426163	11.627265603268748	31.161767430937715	18.052832346202955	13.464072851171629
15.23	17.443937139012895	7.348222409964613	21.765561082202023	23.77192623359125	13.991269980831401	25.191862877675394	8.812789786586286	16.558236518527895	15.038802154142955	31.503742116948036	18.664463717628713	15.597797829342099
15.24	17.263543542014222	7.456623846614344	21.104692420779653	22.170641216005784	14.564074853144408	25.85175682242343	10.68278155604309	17.299949698050913	14.120167289959623	31.001791991793066	17.160214056829616	15.743247261804136
15.25	16.379525374885294	7.7465043521354575	21.33807079339542	22.75738451609303	13.647842619709614	25.140529279344516	11.558314201059295	17.82242211632133	13.93180824477796	33.07991311302853	14.168328091769775	14.23637775111982
15.26	16.72624737348922	6.902581260616383	22.27247531784648	20.796084006245472	13.356506844567582	27.305623859196505	11.33511502358375	16.882047578136927	13.960572351386757	33.310995177580054	14.26845454288617	14.384194470989671
15.27	16.978070143422315	7.091223522897699	21.94558855707745	21.963429848609106	14.031977797543327	26.80111034928742	11.007904606740622	17.150906413820085	13.675993558774245	33.417447738245016	14.878943863004945	14.875431081429932
15.280000000000001	17.200869532844965	5.753733577735256	21.562600567493327	22.712670559056594	14.28383122318206	25.416900916108045	10.205619202932105	17.147585390679733	12.545080558816126	31.535106818117754	14.486099180669122	16.179906469124518
15.290000000000001	16.438287940739635	5.733199191157916	22.40689543987232	23.79042871532782	12.781506935407602	25.982612590541024	8.809335466576432	17.925776699415334	10.92055669989531	29.785544787698665	14.808610202902676	14.611993133904027
15.3	15.385278927769845	5.16569679922397	21.818443195054886	22.342849058948925	12.3112165190065	24.654642586792875	7.679133831872662	19.029696221075685	11.568694429422099	28.22529857285956	15.928765635542858	15.914061844189614
15.31	16.692507282020205	6.873130553178725	22.48854571360055	21.769858667708036	12.863714216673552	26.284400538904844	7.279016399546514	20.400555751436027	10.951110742077345	28.252622503145552	15.915828555313233	16.526047755230522
15.32	16.24800860043157	7.878958507168242	21.09522477017697	23.198767317060867	11.884255097122988	25.94639438280622	7.882584731076758	21.843079008495792	12.492445666578933	28.952891549742063	17.201753819040547	14.84622585067177
15.33	16.583478785228344	7.9500429250844915	22.825977277705075	25.618430173143437	7.307179696208288	25.446287508737345	8.77118028996039	21.932757730915302	11.426368288597846	29.03717128456518	14.691127495548962	13.486863818331093
15.34	16.883814809445866	5.527649899143951	23.25294011587092	25.132289516735145	9.938080785116894	24.365452689418678	7.219961212790967	20.21413937240124	10.878092706363235	28.58983007445464	14.60746255666299	14.666966276729212
15.35	15.026863553913024	8.352049185550547	22.89049512255582	24.034419903601396	7.094805309892634	25.41829190123898	8.171087139534952	20.53156768524352	9.993327684646435	28.725146600799114	13.910159104985095	15.229948778643205
15.36	15.761564176459597	8.809148183717785	23.201731921359876	22.631431676690276	10.869305741958255	26.01305774797256	7.003779568731544	20.167005248174657	10.925131591058614	30.542721645620418	13.065535618717147	15.039238175896816
15.370000000000001	13.24914731823239	6.665065290184102	22.015514834304362	22.948236412806093	11.911983998593792	26.278170684733887	5.756527399959858	18.718482283185956	9.394192964543674	30.51564098352502	14.957874188910843	13.069822955518719
15.38	13.604052418877522	6.283920242079752	20.657288034590827	23.295193635768275	12.791299590063343	25.589312686243296	6.942435900071422	16.487760447804753	11.636678446700815	30.420446242399485	15.154750122703522	10.521988588695717
15.39	15.409398237687476	5.893233080228529	21.46487188213116	24.649455520205795	13.772747159568105	25.291056008428377	7.842905866113566	14.095486873664976	10.599986150231455	30.53127184887644	17.295690953214798	9.233885180310228
15.4	14.587209612778006	4.747010045612091	22.258228826097238	23.678273606199678	12.29570297189235	25.358745615705754	8.961595543179975	15.53974733242844	11.369291383060174	32.65006542038273	16.657060516507062	10.763506991009066
15.41	15.426177717152736	4.694974452734033	23.11931327091905	24.41075029997947	12.09631810242969	25.03450136999086	7.106814859174946	15.55091953876891	11.00638551736101	30.962301759514972	17.462903903957493	10.356102739203722
15.42	15.037302626696325	5.132006730124758	20.052533671541937	26.49927029869365	13.330488189631302	22.824902447192887	7.565454259438546	15.807171836840133	10.204123363040038	31.277987578294425	17.71397865666394	11.343755229140546
15.43	17.488837181765742	3.9058558322204737	19.07281771671986	26.030372135628472	12.61025748099403	24.732589209388728	7.863534402011516	18.19160588951477	10.531870925835237	30.94344853202047	14.979998253562055	13.100113657802753
15.44	16.68622051057593	2.889936142275641	23.079504654888026	24.540787771855175	12.549261481729559	23.191062004625685	10.126124677275753	19.09540052802184	10.1395549124201	29.87246237401738	15.007062072654701	13.837434192666048
15.450000000000001	16.840689901077823	3.865238256102991	23.197791612260158	21.511885432848604	12.474972171891162	23.68417872609044	11.261735299652257	16.152125407944272	11.662573369046429	30.55920250276393	15.109460362062068	14.836760902319343
15.46	15.475322485593145	3.9799935631754764	21.265283959401664	23.88694617956358	10.872824681101305	21.847425604738078	10.792671332770952	19.819225720822313	10.842350043911042	28.64979902869	14.754296592870807	13.498065045615718
15.47	14.500361909688769	3.4129659038760707	22.800739328860505	22.881235286892856	13.608782439798249	22.001244312440438	8.432891673713161	17.711544505185277	11.867109748018438	28.62337697669908	17.833841460986584	13.958224430476331
15.48	15.297776330090604	4.896744996404783	23.055366202687114	23.440175945768026	13.02830643852905	24.057665176632625	8.709227641778396	17.769093144885748	13.928053562020928	26.283738084268922	18.283939466694036	14.22609120776521
15.49	14.2109827435031	4.316796670598452	23.118135187409738	23.776795260071587	13.531893244871922	24.807050607734773	7.088541245981903	15.616546650771033	14.675735543405297	25.142629768056164	18.522527552336566	14.604242417310612
15.5	14.8468065971124	6.029183586706421	24.887559296175755	20.951408087788753	13.62324085330186	25.88091635073146	4.793378977524085	15.31400245798367	14.555225923588829	28.117997788706596	18.491273674378913	13.157577979915226
15.51	14.342272186042266	6.108768613067148	26.86100715128083	20.224450853011632	15.032097610434098	24.980202756901114	4.817993987397753	17.70023527770432	12.167901682405672	29.972717764450838	15.933326120711403	13.860924598467445
15.52	16.006034905029246	6.972232912929466	28.014678849050163	20.74916146438327	12.992924374973164	24.440021969672575	5.290953383384262	16.613942308511056	12.365749998465926	28.72412997653275	16.176885516406536	13.334152567592751
15.530000000000001	15.174410161172235	5.743302035252794	27.745621248585277	20.603982544259505	13.566586474002811	25.926959781835436	5.722374911952103	17.846148424406213	13.158600821408287	32.58914347506254	16.663208139091193	15.230839382593153
15.540000000000001	16.015143613987014	4.949386639221495	27.359706202508864	21.56233095190666	15.838621417214528	22.387933869885845	4.559792372685748	17.367258372065987	12.455358490232314	29.06838009408976	17.26870436080684	16.150614504850967
15.55	12.515257513573998	6.939965806762056	28.20180218287427	20.825997915608607	14.267673185812061	21.55945517185089	6.702386172760408	16.702060610679357	11.98558244042016	30.688012403557927	17.2013251438581	15.963796353273874
15.56	12.847620663404228	4.35520086738714	27.734747510891587	22.485222625316393	15.207947600601209	22.38161683572203	6.397058809236931	17.39218018188674	12.287386774371946	29.508709145147158	20.12206386697643	15.706911367141393
15.57	13.866604172670566	5.498737763670641	28.161469042822493	21.525256005282	12.523738219864368	25.639960817306275	6.935578385188329	16.14447765284261	14.38807358549071	29.285151148778496	19.2819428797977	16.74574999903035
15.58	14.113260334337612	5.373921907465428	26.676078829552573	20.325084702144334	11.160798969982512	24.625548430728085	9.52555760229513	15.17858950654788	13.17683693252783	29.178792493832052	21.07307341469986	16.34331294876457
15.59	14.710417531688945	7.88689630014393	27.807873239058626	19.89918598906153	11.163006148551025	24.541354325904543	10.56447932741925	14.33910251482715	11.2101057824691	28.72003065127649	21.815097277651823	17.72815811004272
15.6	16.856624704956932	7.150236076527232	24.5677137715834	18.361136509876165	11.596735022001	24.88229122676959	8.953690616254713	12.535165216169313	13.468733076431517	30.41532765432774	18.03117360838232	18.110818855316953
15.610000000000001	15.344969889591333	6.600122853009065	27.553423427307237	18.898800703812693	14.490451436983234	23.75747541147926	9.959594621580182	15.197186687276394	9.583382531335037	30.62226274034507	19.654189178775383	17.309915777132357
15.620000000000001	14.377701377894484	6.18277316943503	24.410293865163815	21.081449710329235	13.186206483331636	24.00052765013148	6.633336219173773	15.0644822538414	11.767022688750666	29.784274498508324	18.218426911709766	16.160172931181112
15.63	15.656294167870161	5.549190022229425	26.394278690623576	19.850996818975027	14.954980427380844	23.939268368463203	8.89160018237838	15.52452503990779	11.291551592161023	29.885289332464826	19.72205005196031	16.773658227079142
15.64	14.94199237620585	5.650762994389612	27.005437992342696	19.183189528450846	13.843855328753781	23.122235454727274	10.325593583718087	15.252664313866969	8.666134623139728	28.717613796779997	19.732110525633068	15.906816024292324
15.65	14.930359080556167	5.361450665533788	26.460449026014665	19.64688705002289	14.252631709965387	23.365157991938602	11.497565574316214	17.30496612503054	11.420461026828763	28.857761828644556	19.99408091512982	16.33459695730282
15.66	13.808163805100737	6.125755455896967	26.382744575668514	21.359463890344955	11.897904649995002	23.21650476027576	10.606456575041797	15.827878912496699	12.072904023087423	31.704428271521476	18.332280772198946	18.418630346761443
15.67	13.558206697241593	4.774100423958211	27.357536786489664	20.629023847279356	13.504212729850291	24.431952325892944	10.287054443538985	14.644537966538438	13.286008128653824	29.186421332499147	18.381536560326985	17.31575743668831
15.68	11.259497776209574	4.368148617858741	27.749136631130266	22.203517769198285	14.624628202445072	22.719700771952503	10.547611000345713	16.476496743710882	10.382704944030278	29.396837963009315	15.575919475474882	19.557378146544117
15.69	12.646828228087742	4.727352006028296	26.55917945113119	21.052923144389773	12.095884513522154	23.945735482692566	11.598940395560321	17.886769287970964	10.006572235994627	28.01823787878222	15.107359843383458	22.023746370744526
15.700000000000001	11.945337614967286	4.249808394660135	26.919763201995156	20.442931661467423	11.624786159079427	22.79698456981046	10.699252594103527	18.56306923598563	14.281221478119555	28.674921215662508	15.354418771443326	19.79123608331248
15.71	11.764117905817969	2.728552118122579	26.696198107884708	19.04217599105936	12.182740846233232	23.406409646705477	11.789935528534864	21.780963858514756	12.802235060910023	27.93719269380279	15.268407885206035	20.749267412606986
15.72	11.011832924346495	5.931322777601092	24.445102813818504	18.266428548047312	14.92917179703614	21.891951208210525	12.271712152033208	19.154266777095025	11.182425883520343	29.812353541422777	13.5140229746642	20.163813489415517
15.73	12.249193928507466	5.217209782133627	24.931896280014517	16.212385892045	13.533005382789401	23.361451383669	13.647962680310137	20.663120156822455	11.936978656306879	29.57457889391592	13.713050001037974	19.311491955171267
15.74	13.347489238528937	6.553146843106705	27.263366823102455	17.18574399175562	15.780246913633677	23.695446890877463	11.661001256681267	22.48910779998744	13.075391153908425	28.5213811441798	12.276767660728026	18.40001642357948
15.75	12.350981875377654	5.6749622611575585	27.285770335172902	17.398458810429325	14.524793441488981	25.45013384614597	10.485853022909847	20.17071162678438	14.882559579230922	30.23057015080859	14.29104099733996	19.18152145970976
15.76	12.82762601901535	4.841503077351301	26.71608238902751	21.092166835049632	14.680520037160823	27.052145117110964	11.123759495983228	19.639154223024697	17.143331389273243	33.535005287399564	12.614077208266087	21.84108740751937
15.77	12.881884626611251	3.3671040381137107	26.195617572659263	20.70363483298905	14.619718312669397	29.075828451166366	8.904882150083198	20.401256858062837	14.619766273563382	29.362468429504883	11.87493101019194	19.844633631948053
15.780000000000001	14.314824789044616	2.5116668556614923	28.610264140478463	20.763224576227472	16.662291433163418	28.023664077621966	9.314953255131437	22.007112674827813	16.970476466612187	30.93638749162415	12.144321462468067	19.455339434676738
15.790000000000001	11.26196376662868	1.8185642593014102	23.909053036299138	20.79998777990795	14.361814380114236	28.49150925159558	12.251966882832157	21.76182528613767	17.755851894077942	30.41271918233025	13.727668224096819	18.915596622015766
15.8	11.278215538781451	3.6925467429215457	27.793917007401323	21.173088948380766	13.89498922537784	25.499713764086213	12.313592997206369	22.01043831219275	17.931851088685338	29.590429640034593	12.028399664079167	19.23216475873802
15.81	9.904706155879964	2.471874310540383	26.073366296612566	20.617157230876984	13.436520646137367	26.644630543795373	10.84581976066945	22.71268481270548	16.160252968701354	29.381285801632533	11.016799224698739	20.285565068516377
15.82	11.152583567171577	4.178142400753795	26.403722262286507	21.76999376996421	12.482626780873758	25.91181867197207	12.408067489956615	22.050152686620002	13.832853942079709	30.360538938149197	12.96345799275084	19.6984300022578
15.83	9.777342302893933	4.24154713089691	25.94218701193133	22.570106731050483	12.10118916322353	23.77558332207415	12.059517127760321	21.472436918259493	15.136064254805554	27.297435917776493	14.402121254531217	18.40285455269321
15.84	11.930049717276939	3.475187622317474	25.249433289602635	19.025201477025576	13.322363073103247	24.43042184110598	11.764478963309294	22.36855336005112	13.519690055789882	28.69677900370308	16.86820010754409	19.9926501592582
15.85	11.449015543341144	3.5117849682785955	24.898254307378874	20.910847288000856	13.207482329989965	23.624903454569207	10.590245408292633	20.745340032808162	13.675776400760903	28.802058683684347	17.614783631977016	20.184289383317985
15.860000000000001	12.003354294309029	2.364025978390813	24.40892118587801	20.81426745382015	14.676422589405918	23.85531569049147	8.146342390541225	22.69448799580031	13.393840450217551	30.566556401114187	16.2144480158112	21.242695703073338
15.870000000000001	11.656044864044102	3.1695418610898645	23.793976847650118	20.849271016436024	14.517216063676127	25.567043789685133	5.947482407925172	23.556239972544336	16.525696975266783	28.732392106370025	15.18305099438676	21.015324932287783
15.88	10.396457446717143	5.2163155562333845	24.72579918904625	22.83854266647365	13.353063232279316	27.3488207724302	8.12832588391617	23.217279406918326	15.752334961364664	32.229915844186415	14.16579067737404	19.40096160045434
15.89	12.268829365435309	4.65777169978271	27.003514765249548	21.83394319399976	13.243403277444784	25.349665995402997	8.60569109392022	21.251122338527423	13.86321957667073	33.94432901281876	15.562015810284114	18.262960273194096
15.9	11.380267135489436	3.481114886714934	24.982376631951475	21.39371650883884	14.968558928255964	25.589036182256287	7.473818113646683	18.57676600132261	15.457371895849434	33.13197941073538	14.757334462913253	16.645465783636606
15.91	11.744381838378578	7.570890929031494	25.779954457129698	23.253935257102498	14.498358038178386	27.91992789446675	6.410554466762441	16.46923172103869	15.343815814436116	32.37441603723924	14.340698853851466	18.488211307450626
15.92	11.549986223839094	5.691315083933409	26.16911885857364	21.24095913869658	15.863402662550751	27.797513541846804	8.422060476554936	17.311410284424667	14.960505760354728	31.685491949515292	18.98463471430543	19.126281559138228
15.93	10.342899638525331	6.238454324633675	25.32639986397166	21.308323719801912	12.68330888365156	27.069889361021545	9.045774761376718	15.372212784301603	16.690448825325188	30.2658420287255	19.163515949838924	20.53888954952718
15.94	13.22919140456525	5.029080678247498	23.597930752254626	23.589458715923172	12.614246870864193	26.067060564647715	10.176575144942168	15.45998355441601	16.8077520058744	31.28570605200686	18.30715329642917	22.055430664971126
15.950000000000001	12.554344659506581	5.566991888478259	24.293465217638087	24.03683997261491	11.72347107244597	25.93039611001261	11.357012967274255	14.969844572383082	16.04413496432359	31.508066624404478	17.944536413290635	19.991056736502593
15.96	10.977330268233752	6.575687520882754	24.591646720903427	22.76097742974584	14.589652202580059	27.72811545070235	10.503160382350098	13.169681898684086	15.589989369900527	30.78781958301739	19.105691150314808	20.73728577960403
15.97	10.349638933480144	6.193744876965756	24.399741902530668	21.471123149909573	14.439628201134061	26.71250795337883	10.538901444886662	12.984853840708542	15.390964565830437	28.859097499701026	21.016338400965402	20.558559006644355
15.98	10.715235335014672	6.967271361805461	25.462800822943468	20.822126924985447	12.86830064574716	27.846478016733904	8.750679231923174	13.458068873584144	16.246266691267753	31.688189591508145	20.06654019645684	20.427834974271843
15.99	9.569784710603585	7.767377135909349	25.1661409707698	19.285208226701776	11.3683116702582	27.066965618798676	8.849865559413155	13.981631312785675	14.073741021592198	33.35812509037091	19.389822109793617	19.450623138368332
16.0	9.05813650398168	7.115206889693298	26.67863234009398	19.29311584204939	14.702248608748071	24.84562369856023	7.29213952415081	16.723317495891738	16.582143708214016	33.13272564822082	17.239761610044223	19.395241327648424
16.01	11.986385072830549	5.463412356267017	27.540465243056055	18.828982987521478	15.048979136258621	25.542012157282215	6.785611928118372	16.247455649615013	17.03914928307273	31.72844810299459	18.63531683837356	19.87233629664776
16.02	10.996732193576628	5.781467272242505	25.835786790154046	20.28479657911614	13.005883406395721	24.295170671329082	8.424103461236507	14.403000891666599	16.235706922673426	29.433438847660806	18.128772352736185	20.687771414338187
16.03	13.996864823334919	4.123834072821426	24.191196379937935	19.6115184537448	14.78848834165333	25.109217714421543	8.348733831228285	17.404769487750166	17.399299886939453	29.65294569613849	21.14441342219567	21.408268495065307
16.04	14.773877727550776	5.621560088702369	26.0240153893829	20.646980843672566	11.591272927921112	26.20771906075618	4.877549717559808	18.88304837277949	17.531328160246623	30.792872552272794	21.030704938323176	20.106699356559737
16.05	12.94649564030858	7.234384258788755	27.572690775877003	20.028750046435885	12.425683501011802	25.77458203181253	6.156452470609838	19.10156001196973	16.287733268747083	31.37835061563278	23.791919200013012	20.874196888959563
16.06	13.767473979147624	6.631398755321209	28.846811983550854	17.829843405391998	15.673941630507104	25.509852776928696	6.903330290286909	18.266814733367248	16.09261504953107	29.477895269936738	20.112451401892546	20.36950961372083
16.07	12.126417533144185	4.817019564752691	26.684778874543294	18.145033286984958	14.765811659582509	26.84317691293385	9.271379028708566	19.68689584806756	16.614679261171293	30.188394426340686	21.05087862429627	21.74489481341794
16.080000000000002	12.785852647296352	4.791397139517282	26.059626376077265	17.605796800478615	15.982245091781179	25.089322258095446	7.911327160368095	19.01316980317969	15.328391738697325	31.4753001651363	23.054858847708232	22.11156878582457
16.09	13.71223503786092	6.008305471917773	26.07195450985491	15.725814245439262	14.288322201403387	25.36470830756137	7.458956358417805	20.862214272569382	15.43016403819629	31.083753837697596	20.79383968458402	23.75675422646605
16.1	13.800310049556979	4.885046201675795	27.996703398579914	18.248422111040338	13.555710760097261	25.856978588120704	7.691322625085948	18.7498854197045	16.2776255722657	28.946139766472033	19.329070990889313	23.74973892753789
16.11	10.805493133680363	2.52228241658675	27.35440854591232	18.011147892956078	12.050463666382365	25.826571657032332	6.54888774014851	18.754455001101977	17.759933352346998	28.550892860874658	19.439540341172677	22.010472407831145
16.12	15.130711146299701	5.06155968218506	29.787423107983862	19.34019452001537	13.882822454944716	24.290697508056223	5.532802040025002	20.62125463657428	18.65713727875258	30.065648579462316	18.232371060660384	22.430159374867372
16.13	15.115342491181092	4.937061852865178	28.344936261649913	22.280473905765657	12.575158364549461	23.78864124315097	8.634410225020327	21.383478584641434	15.787592786786034	28.353816219527616	20.11501036032586	21.220833322107808
16.14	13.867622143820872	6.519144311415027	27.14199690986132	20.067221943641876	13.086068839815388	23.54559900679566	9.961183536736927	23.488474904221096	17.492874985066678	28.20835898568672	21.23221570130665	21.52370832991157
16.15	13.03931111802457	6.943257553844686	26.17582373181109	21.17672920919585	12.33885463176199	25.801807544505774	7.779350519156498	21.8963203798134	16.643207387613895	27.049300996433868	19.181823407961435	22.961924008102343
16.16	12.37764949564403	4.528845840268762	26.85552519879524	23.01240649352883	13.561867082665906	25.83836036560093	7.962700271587274	20.96452422837919	16.58108603353292	27.64984245273795	19.691632829963154	21.43262410281354
16.17	11.120995279103104	4.521434684365159	26.123264330489775	21.0387835333625	13.915431209346137	25.294051042584396	7.385343965569816	20.37702113340945	14.828679327899001	29.892664298825878	20.37329462974238	20.893503729526678
16.18	13.67044116115842	5.412010623445672	26.964541690424547	21.056089591707675	14.738082868131372	25.95377162147629	5.721879779652271	19.87736431825702	13.538785361864667	30.272733105333092	19.046922922184017	23.0350934717214
16.19	12.989701971339171	4.9271999197351395	27.541891734421647	20.366092679758335	13.186358537030717	25.309189862843805	9.356934710815583	19.833127940090222	15.104203664163027	31.332626985403905	16.552258452633076	22.6775452170383
16.2	15.132690009263376	5.338102643383227	26.88092889528098	21.84546162134677	14.342889839193475	23.80998536060681	5.041321742470097	18.020924531139126	14.927723515781254	33.592557604039634	17.464810083551367	21.522437319410027
16.21	12.9105236033315	4.546642017826501	28.22851851785452	21.554804636326008	12.317797683661183	23.37415304142306	4.462161051859479	16.956365072392632	14.46494513329981	34.47104007613527	17.286615928312226	25.059419025659015
16.22	11.96407072155112	3.366494451927957	24.97003557189823	23.28455649648844	13.534357827125755	21.37209521324383	5.341488838610824	18.501364642365594	12.49944264002265	34.698979974040455	19.246355811310636	22.37524822344226
16.23	12.779769454333225	6.189029290466958	22.27631388073823	21.340650095727632	13.841003705194368	21.130305370373673	4.937793447783822	18.014394927150157	11.885366182632186	32.600138894169504	17.130768824133174	24.36489285079469
16.240000000000002	13.298851478931972	5.596771787956002	22.199896563184783	21.71169385115949	11.539626276319337	22.060115160591113	6.851031288221954	19.20363789108025	10.973117964949063	31.267743392950486	17.31745731110344	24.972537668005803
16.25	15.72290179568391	5.259073359523796	22.879833476460217	25.11802121046828	14.279271452520481	24.438242728365708	5.9239398366562455	21.48142499897628	10.311138294858157	32.048143380174736	18.35795382364519	22.80269668522555
16.26	11.744593359967231	6.440003061370737	23.312905323012384	23.988620170106103	16.621558257507374	25.52108160306644	3.372828952973759	21.068392893531733	11.6060135190524	30.571060123472165	19.634799826923775	24.017350546040028
16.27	11.66849992857143	8.255912494108708	24.607086486660762	21.874065047862423	15.504891000681546	23.458980522795997	6.944044899590483	21.60129218158149	13.32240882789295	30.162939321569006	19.130326794526265	24.423793413956165
16.28	12.852855358296297	10.46171416934648	23.22848143731754	21.182267499845675	12.995371812686727	24.352304071367303	5.721141914076785	18.412410961537724	14.167326716031107	29.42914196939392	18.34776804525887	24.297282379176668
16.29	12.162244907633783	11.140706253802193	23.00166868560458	22.123180980668565	14.909819020090897	25.316836759049924	3.2932392819572702	18.376980210913807	12.359015794375006	28.90108853043528	18.25176299763592	24.96302942665485
16.3	13.996743762884641	7.762578402177716	21.87299374959015	21.97469218264821	12.754852905043393	25.048845043511026	2.2608401091581256	19.730422089219118	10.176800267656883	33.64694950681623	18.37058142951177	23.44935770583925
16.31	12.232882298720028	6.900599922083287	23.61091865642946	22.673806248952285	11.999083526873296	25.111726915013723	2.827088244640138	20.67764067762959	9.959354010285594	31.79916322051248	18.570579256243906	25.24985207112571
16.32	11.864501379459485	5.822779399384128	20.034618931068287	20.852271109628443	14.087840653183093	25.925381961554585	3.8444527717196104	22.416107981504208	11.577284929637676	30.576237653836916	18.196121799273875	22.954063377366424
16.330000000000002	12.560090561704232	9.417049587596384	22.379259564061023	20.900052550253697	16.17433166080147	24.74552382643281	4.894298585451145	21.5046868224179	11.844693552281713	30.4094424929473	17.800354761201657	24.109224072915747
16.34	11.240393429359582	8.99423471666773	22.479245457340486	19.763978756472703	15.316501670729052	25.179806642833334	4.490402411858177	20.727368718220113	11.522793428945134	28.917792411129234	19.47116311444636	23.691640132784773
16.35	12.54759542725744	8.90108929264708	22.334993638348084	21.921350739444122	15.156741228595713	25.812740999529606	5.031939100100837	21.57413233833166	13.306089549162632	29.821656003652244	18.677033237521602	21.82297066759224
16.36	12.153565241340333	9.323161961001645	22.43997790400049	23.981233977163868	16.657724190512347	27.28572606950802	5.254148489492042	19.483476692097426	14.448960379715993	32.009336730170375	16.60375574839438	21.854680054586872
16.37	13.877054258152976	10.76336864395779	22.637634891951734	22.851060068415634	15.017628967017675	25.470007819416562	6.558275835401378	20.689219142142502	14.475184734935251	29.740066098611987	17.09187307802528	22.731668969490944
16.38	10.028723777631878	12.294913478249677	25.179955641751807	22.536799326338627	15.26978172693112	26.682576637721432	5.406581891144152	22.615094951533344	13.090795011342061	30.80285268996546	18.31562031857054	21.718019860384942
16.39	9.304596100972914	11.416700454862076	24.735306912262203	23.6605762205602	15.187948714133972	26.27903736544669	4.574104356963373	21.00589873890358	13.551798551195553	28.64007860966168	17.64607739355604	21.82437461860875
16.4	10.892349923621463	10.169331297758571	25.179346936827436	24.776387187779598	16.5810157282075	26.98175668441381	4.383926025879932	21.686398203091805	12.211160876900172	30.053716895810066	17.194490860560396	20.778810221308106
16.41	9.294068081434585	8.978695290537644	24.183329093182735	25.302343642077542	15.630171854934707	24.82316626286439	3.3212285560776906	21.808634840311626	12.901151090260576	28.504952194824032	15.930130228990695	21.260451489865954
16.42	9.980245565975101	10.928433320737978	25.598573376787126	23.04332127069632	17.409379998002287	23.957942789601056	4.912224081152452	24.41408725766186	11.79418439586969	28.098601523904286	18.076405717145363	21.21626262469244
16.43	9.611820215310312	9.993601261125306	24.79456047644701	21.017656340917238	18.10730299460328	24.873231307130723	6.238701032414509	26.416017359463886	13.534874831618108	27.682056700668113	17.78423884898166	22.07101860101167
16.44	9.06567733869523	12.469021895521669	24.649798555425274	21.502215056793652	16.76187817797558	23.9088027887001	4.621080358133246	26.215209804120107	12.439992873149539	25.56365315037106	18.46688016605409	22.734912489059546
16.45	9.114788788922004	11.86353572928375	23.144401560925708	19.84579804537602	15.581021661600653	23.91166460700824	5.294394479358719	25.669695550678682	16.266031985680847	26.72454839578088	19.981887292548397	22.664717626596946
16.46	10.666136945402044	12.635827309964565	22.02535133848583	20.406484597055726	13.528239588091905	24.915924346449202	5.625421355878787	25.36518605589876	15.729388271605046	28.099942955788666	19.100094252787436	21.0043889772296
16.47	12.060235283133048	11.927338684084077	23.215349819252157	20.021894804668158	13.604449599132227	24.3370873481526	8.956687451535148	24.910759059686004	15.985041720789033	28.779491088424866	20.579790903144943	21.824381549381272
16.48	10.442393341364657	11.951238185769432	23.762732180463395	19.844022020304934	12.729495290425955	25.727961972065994	8.732694171718977	24.819403461545438	17.93975454014969	28.609113234956034	19.130094970676726	23.96372724796167
16.490000000000002	10.59526935724694	12.349684115422818	22.729596501859127	20.909558013047892	13.26375601805	26.02462390809887	9.560935178127313	25.72163024543163	16.50789635849761	28.641065001922833	18.954810351872613	24.32597009804518
16.5	10.982067405999251	10.74144786487231	23.474178795083148	18.65101996808351	14.08601625417678	27.259895912287803	9.471006629812447	24.696379656158438	16.055532759470456	27.555759045895815	17.652384035768744	23.35516031218628
16.51	12.654962365234667	11.357856690261862	25.846866480399022	17.957476483857985	14.355521359649382	26.44908407496581	6.4978739065278805	21.78793043324239	13.387896130872965	28.118594473260416	17.94564832653844	20.63755486623262
16.52	12.35743615249059	8.718019408292891	24.955442252858532	21.60728369463622	16.47069868184724	25.375281979026738	5.219799228874741	21.307235534655458	13.54696538131745	26.837775962326965	16.906675573977964	22.8611004958059
16.53	12.999924848283593	10.38213404833206	23.618689997362583	20.60412411558821	17.09394255939424	24.222946987339242	4.309775604955678	19.847778826679146	13.516082485207543	30.097420295854942	16.312177044310104	22.65093757639267
16.54	12.97391506221716	10.632117551786601	25.325774547631752	23.053028544588624	18.41255240987865	24.38198742609074	6.594579010878856	19.968306462266423	13.561438264394429	28.895249283157725	18.571525333178794	23.533699028925586
16.55	11.633060578984708	13.179095614721508	24.852180115720827	23.341984219528847	18.11081974433008	25.622419932713925	7.2303839219105965	18.987165467979903	13.03149126810894	27.210512202581448	17.45632940955603	21.346166238794734
16.56	13.218720439232765	12.646809788911728	24.752746120058077	23.919124412621795	17.12549980906241	23.964410763404214	6.323135892667519	19.74189227385356	12.96702110133641	27.1664557491391	14.472670042217638	21.66627799642897
16.57	14.085545044454015	11.898918513896335	26.11640764715624	21.415909834711318	13.892578666868863	25.88514435780398	7.912677717993129	20.442995964569484	15.062892855242588	27.12858394407425	12.437956541934334	20.193192791920993
16.580000000000002	13.259240813787356	11.685148885890998	25.855413167911752	22.578668779449835	14.123783206471455	26.710305105372026	8.37779205046866	21.03271050915313	13.79871471119005	26.374167006180098	16.467902174671377	21.09390102217878
16.59	11.808775299790465	11.028947801090101	26.408761339689285	24.62249199517353	14.725062272388696	26.322531206410655	8.033252156737994	20.73985540383627	15.436263543605396	24.454146636962953	16.131418020000098	21.548063430504882
16.6	11.85903583717285	10.855490140553293	25.067796962624858	24.08812255075642	13.305086189983372	28.648066490088834	5.797987913996406	21.393714941839256	15.361283894437177	25.971918929660944	16.230302034972485	19.074286857030756
16.61	13.397587509711439	11.016850396865301	24.70890334035633	23.04802747256322	12.379827365037514	28.534596464961517	6.2943338047956106	23.36888969299286	15.221148624590953	25.365001766263752	17.724317167763516	21.161066728973655
16.62	10.418725054739399	11.594675822364298	23.410835733921914	24.452203237833082	11.171881497486927	28.482418944529634	5.8079500134154705	25.79668276262398	15.599138657646455	23.85058082072773	15.520158204547316	22.186474668609335
16.63	11.794865413995266	10.589507107053183	22.99180286773931	22.837629102626092	12.646445857869988	29.76795016808948	8.582697852732037	24.06308576791824	16.143331666222096	23.996036544064303	15.482033078384937	21.24715326822262
16.64	13.767489654129362	12.60809738937797	21.690522402104744	23.330147247613482	12.357835325873294	31.07875320023157	7.368780920732088	23.05435270866539	15.671463673085633	21.02625535382209	20.489223820167556	20.97692784904262
16.65	13.3254139055826	10.464190595036285	23.05224463635872	23.768826577725488	12.758154552011499	31.29131237504615	7.267124429751202	19.741660312188618	16.441016297006698	24.711376898531014	19.60097317499978	21.90928411108195
16.66	15.06240930235959	10.936376418556893	23.56928308233563	24.699497922115366	12.54789497435441	26.92352653992125	7.98979043539448	20.882201459434246	15.782410387087253	24.048960835949757	19.979266400662066	19.834956706733852
16.67	15.363598182222258	11.619661872817181	23.110532045013596	23.505110525106087	10.020604114867341	27.776154901877447	10.025532499126108	21.939765447445023	15.478986447745832	25.719817398524714	20.08911164335471	19.911714381995303
16.68	15.790358269785752	10.706510615248444	23.71287997512389	25.476288115240997	10.85633689903034	27.265960050184706	8.914462144034774	22.078884120884876	16.128146010444592	23.937819543056207	18.937187532604234	21.10715134190859
16.69	15.148677195453475	9.12141254456591	24.361676350127563	24.8673177131573	11.75341705205529	28.61436403865051	9.76259435861851	20.305736184574915	17.844345378837037	24.547608528292464	18.859468090895	23.786987509129766
16.7	13.232009039815043	9.39533397822165	22.870328598165877	27.12157267669452	11.284928894961121	30.36496161049014	8.48774608698524	17.192260367332505	18.985602412336572	25.954879509512715	18.46062461749042	23.355989469387765
16.71	12.352098810183827	10.095643253152819	20.6648241199477	27.195885648248435	11.523859185803646	31.597449601418287	10.510887688630685	15.89298060014623	18.11797083510744	25.812598871480855	17.497771516473755	22.822597280395254
16.72	12.958784101712038	7.869151923919193	22.7794244935144	25.057516607378496	9.671984879276817	30.50835447290986	9.45037786080505	17.200293363724576	17.490719205982906	24.754216546587017	18.025401359019373	21.71747207713345
16.73	14.217561018101188	8.374333198265386	19.525582609712156	25.381962779325775	10.787864852454943	28.83319480882672	7.908203618859771	17.980617654065185	19.009942186276614	25.233302898239273	16.542584946694177	22.687273283437634
16.740000000000002	13.716431845766403	10.527550922676088	21.294359591897724	27.49200647259253	12.263155848943494	28.75137046525693	6.7717715774987335	19.08901291854799	18.51366475416567	26.63332849930759	18.205207423131128	22.08833828539444
16.75	12.349668655636895	10.228437539269311	18.338242806914696	27.776442953671303	14.481087428001194	26.851261179045732	8.869044290110132	18.93601612995117	15.661395183770535	27.514283631260838	17.378322959101453	22.047267356198674
16.76	14.68085983564699	12.80827839245985	18.935770280397268	27.872147790685823	15.054476001274589	25.972472747846435	9.424343347143704	18.74060644309388	17.3279526792157	29.210868401590012	17.42977325797753	23.293628468272974
16.77	16.404319614638286	11.4152990336857	18.807265633860037	26.81264150313842	14.915030077122708	23.897024842857473	8.87317431777246	18.53909610876179	16.18286567937563	29.53555583959287	15.81949481265108	23.871889846836115
16.78	13.458081673078414	11.281712647318352	17.932207838836955	24.250904539845177	13.609137773780024	25.60042934920518	10.230737216808278	18.361014679944795	15.955873272677211	28.629628267188846	16.619786259104593	23.340013397923855
16.79	13.436571310998854	12.323425665480883	19.943481291802307	23.44477247576366	15.936902795401524	27.0662286887229	9.392559378725721	18.003029033499267	15.154874593272767	27.973202628980513	16.999175779783524	24.09101777014477
16.8	13.582378750942357	11.114347647722543	18.013272698901815	23.937777632549423	14.562550661604604	24.990880219265676	7.554930038648721	18.924253480967444	14.447244695990394	28.19951477184255	18.176374661929252	24.739185512856007
16.81	14.296572197513765	10.567296074795557	17.704067913437154	23.76494088576672	14.008308223400546	24.30307603710428	6.74408105022359	18.7218089191573	16.433351920809816	27.989365353127706	18.214924794561316	25.40131067623041
16.82	14.3285928255594	11.47570962267197	19.483602592365834	21.311932033321913	14.773310486163766	25.920947866318066	6.333277384804744	19.13057366543949	17.658226680443306	27.667026203409517	19.226513389049252	24.77054833736648
16.830000000000002	13.214196359759356	9.537367606514564	20.283250897834463	20.353714069322205	13.560056107209885	25.04692759913602	4.363360458448783	18.07522816658451	15.539779684177967	26.457177312612387	18.484329327907854	24.79192047955633
16.84	13.387112999331206	10.87201212113882	18.88222834070027	20.573315794982875	13.867700383655906	25.158529179668307	2.3258144188477177	19.574624901068002	17.16549056179556	26.878459539179296	17.0260821446527	25.949149565583408
16.85	12.819928658612055	11.32158137237204	19.759304969489893	18.94789426992161	15.663942022613115	25.551636740827007	1.6972698623931513	20.301742212604616	17.975781082497797	25.785306471816597	16.286507811308965	26.958642599603483
16.86	12.75401900121133	12.05826435135349	21.113870287867634	20.51356824617492	16.77122010229058	26.170209489693907	1.7545239787605684	20.576509099364692	17.149488724148807	27.73571895439885	17.49713064257033	26.49919651667648
16.87	12.762140665979896	12.353501319756873	21.452165089973075	19.86808984978911	15.048589000607258	26.31013144446327	2.0714439257155064	19.810270617898713	15.923574590117854	25.755950256180228	18.833471068514022	25.95294855696208
16.88	12.066338384322359	11.853554135515452	22.356137480778536	20.691793339217124	13.600569441464774	26.570081485960397	2.092935838139304	17.7945117213466	14.300010787418653	26.9357616618943	19.005050327063536	25.524026806681086
16.89	12.467479262740657	12.957481102107694	22.52671571663262	21.65117774777885	12.997442309461075	26.11518731436777	3.2176014986667023	19.161050934683818	16.330611558144575	25.585244946932463	17.563728180926052	25.0618102184324
16.9	12.863042755200665	13.074296600456206	24.59540732745317	18.389390077442076	12.65914905669974	27.577976374418903	5.9225100070173955	20.92445389068658	15.02063423952512	26.59932596488539	18.114785451314198	25.920394621235687
16.91	12.87752463827157	13.249031225688226	23.062850627493354	18.51746368976262	12.982344000080309	25.882474966943192	5.40702016709102	19.148809867555592	14.029749491677714	27.241892670748552	17.671517041964606	26.25243562388905
16.92	13.124276953211998	11.536403889975883	22.322327617774402	22.042488967378247	14.276493825277914	25.551236371905922	6.160966720586623	19.63033761610911	14.47215201991567	26.333608382433813	15.210062584373354	25.443213101646872
16.93	14.864984506939445	11.165505722040479	19.292752348680224	22.275327136169597	15.713069863214262	23.753825417671838	6.874161902003524	21.059038526603285	12.266368177960254	25.844702693247218	16.39159026328768	26.797619691044687
16.94	14.85261679566744	9.656035566610422	20.56828829326209	24.003312199287436	14.726573218684312	23.94808985643881	6.639569152113811	23.808346836387418	11.513368809606314	27.278118633348342	15.523465905485223	25.068574067920938
16.95	14.710366751033499	8.602767424416061	20.281497549210396	23.157197473343253	14.235303318784407	23.37139874144627	8.15870582047423	22.16384297440846	14.132143454071485	27.032038466694654	17.37233793064988	24.476711099029156
16.96	12.992121982692277	9.734575499054579	21.298849575021695	23.23254186020212	14.818320361076038	25.92609483017765	6.2215627982605834	23.955054522641014	14.149542848001845	26.178027272085355	15.216439022741715	25.65076966765528
16.97	13.109815369683638	7.28388116619446	19.928148261007173	23.08302901779644	15.100266976367957	25.32766680023897	7.834486156307854	24.56311729419999	13.001334854152267	26.62164260105396	13.128370304947794	24.05761439982657
16.98	14.13450018829276	10.048326043239738	19.888863253224052	22.701141354275524	17.02196086462347	22.727254326843692	6.704218167936402	23.595643477170135	15.757513395789589	27.406202164394927	13.481183294657754	24.976800601007383
16.990000000000002	12.387052299279343	11.613483322761367	18.504041069310087	21.640715833406432	17.758257498441587	24.14417811697107	8.334516088839644	24.246504778754115	15.701986606316394	28.67495498873915	14.046528971427092	25.042779861512397
17.0	14.000879182373817	13.69596062075459	17.806144767918205	21.94850161783744	17.63673334841849	24.52367295719587	7.6775553899812765	22.278661751637543	16.06447460405218	30.083629432542992	12.8536845531818	25.522235900372102
17.01	14.953442517862117	10.715487135560402	17.113668027154795	19.703538660550116	17.131036862785184	22.744648313516826	8.607006239998018	22.54193459924792	16.759659419753135	28.878580498317234	13.457658539704456	24.705290784049772
17.02	13.095269033543758	10.714736149705153	19.900030720568942	20.998811791095754	17.36450223140568	25.046889089767607	8.77725774730491	23.336625364643538	14.805965941734085	29.42983152221827	14.86199741086816	25.262490310584074
17.03	15.29561535515032	11.166101244457996	18.74773570765644	21.369627714586546	17.895993947152533	23.124717636498183	8.779862256993193	23.49403698453894	14.48614622794552	29.669647186951366	13.880475364126628	25.205337971648312
17.04	17.700363531172794	11.646256075915037	19.097296385478582	21.18294258366028	17.113858757265486	23.532797007919847	11.231980684906677	23.44211282348728	14.896547663644123	29.258444706159292	15.097766886226813	25.171193156494727
17.05	15.426048447146995	11.703187653485253	18.0903455014841	20.001126302957015	16.653020928406583	24.803175908883116	7.7922304518899095	23.03519422048209	17.025345472658845	32.24638099713416	15.828201892300958	24.44841753881148
17.06	18.40378699881748	12.346141947169802	20.267496525000688	20.670457207222626	14.763064913995208	26.553513363366985	8.323620710722476	23.267260251519595	16.963382569466987	30.188579838474297	15.193916417210106	24.918537311569832
17.07	17.910614144655682	11.691280769229396	18.26399513715559	21.689827196739362	11.7471165530013	25.711574443278916	7.902867827122877	24.25824757104646	17.789424848488036	29.400333676957672	16.06077359133425	25.149108590756523
17.080000000000002	17.36098798587806	10.85744851921196	15.614684536528436	22.725995505327997	11.50697437993457	25.84047437549542	7.747765296068044	23.18331115819774	16.661293554321183	27.210105415163763	16.4724318228368	25.26995927032436
17.09	15.159435471361553	11.3686735010884	16.290168633738684	23.23375061911776	12.330195761377526	25.268813055531453	4.424972753438468	22.492653062246998	15.0739551676601	26.462939698502293	17.098981400721193	26.096510935858614
17.1	14.766007491992623	14.679159010574653	17.231308070205692	23.33447839080779	12.67734644750747	24.51355692486575	5.358064423589313	21.942873541958807	15.364751905400384	28.115067387612292	19.72951615021002	25.55910936010298
17.11	15.48800039654116	14.396059004620655	17.682713760326003	19.9429415735187	13.406362954674172	26.058352890599956	7.247126974927879	24.019288142431705	15.177073017097406	25.20591297701726	20.546218755691545	25.299339005770833
17.12	14.985179026975993	15.20107565295985	16.438681604346208	21.42352208221049	13.098643157159238	25.53145232116665	7.310402752161523	24.632953849062144	16.251219847980064	26.721330402419817	17.661284476725307	28.1734230915196
17.13	13.602204004621628	14.078283494260196	16.5808645704128	20.54508720141446	14.547404079569263	26.204012726063056	5.655618002184544	25.859212507498825	18.3994340007788	28.277809953962365	18.244529229419935	28.24969968409796
17.14	15.196453490047936	13.726419639298452	17.695982807790106	20.397440791646673	14.77799415016072	25.06282349871114	4.162475124113561	27.072286072146102	17.4034112465316	29.380704621643645	17.79098099704619	26.566285916210838
17.150000000000002	14.057038418919287	14.585262678800202	16.140136269417653	19.076410305603357	15.712551297705183	27.4459881806145	5.000836376190797	26.528503557702958	18.010386687438825	27.628897845592057	17.660270196232812	25.92632453012822
17.16	11.121115203928195	12.280616751281622	15.976809729518068	18.934093503641453	16.33267444648116	25.877673504053927	4.9361734649371485	24.654510118823705	16.413993460686804	29.583453917113495	22.03161562121507	23.07019282875691
17.17	10.839827626146354	11.20054449902441	16.196396627960535	21.963384025368857	17.03196727548771	24.575796984400117	5.196350296646507	23.50901209914148	17.12799191729643	29.155633876401634	21.859062707685066	27.2794396975653
17.18	12.765908137405205	9.997712762711915	16.968720277425586	22.347387624388862	16.83601993187098	26.5946614767446	5.334301724397689	23.649569977415958	17.96804040143311	26.890595587739213	18.625624615727272	27.01638015435041
17.19	11.65287003646891	10.400982013871525	16.510874115358934	20.24088563803825	17.046629350465313	25.190671053568803	4.426679849058634	22.808337012852167	16.76899308425706	27.353946238963438	15.609868167373184	27.75789029773197
17.2	11.259682326105304	10.322555166062601	17.52286339973292	22.41254328650756	17.611639424139327	26.734573301022966	6.306752016934166	23.212019211605455	18.123213642443634	29.64358519459627	16.724597831683706	25.822638981884058
17.21	11.343648949625548	9.576294201813647	16.75136963034161	21.432298540468846	14.973263052787983	25.105686618638842	8.191430385433483	23.684555075290387	20.90956638684489	28.281083648243822	15.467522430484577	26.414650630316526
17.22	14.425246309004566	12.876959997649182	17.241080137263637	22.875843724785913	14.762387714190817	24.879019083999005	8.013519231798906	24.12132999851548	20.52406131930474	28.012024653192324	17.5560472478203	26.925051616144756
[truncated: 98,278 more rows]
