# Supplementary material for: Energy coupling and stoichiometry of Zn2+/H+ antiport by the prokaryotic cation diffusion facilitator YiiP
Source: eLife. 2023 Oct 31;12:RP87167. doi: 10.7554/eLife.87167 (PMC10617992; doi:10.7554/eLife.87167)
Supplement: Figure 4—figure supplement 1—source data 2. [file elife-87167-fig4-figsupp1-data2.xlsx]

## Sheet: RawData
NanoTemper Technologies	NanoTemper Technologies
MO.Affinity Analysis v2.3	MO.Affinity Analysis v2.3
Origin of exported data	Origin of exported data
Project Title:
Comment:
Project File Path:	C:\Users\nanotemper\Desktop\Adel\YiiP\site A pH\new analysis\site A pH.nta
Analysis-Set Name:	Analysis-Set #1
Exported from:	MST Traces
Exported on:	2023-09-25 15:51:23
Analysis Settings	Analysis Settings
Type of Analysis:	MST
Evaluation strategy:	Manual
Cold Region Start:	-1
Cold Region End:	0
Hot Region Start:	14
Hot Region End:	15
Sample Information	Sample Information		Sample Information	Sample Information		Sample Information	Sample Information		Sample Information	Sample Information		Sample Information	Sample Information		Sample Information	Sample Information		Sample Information	Sample Information		Sample Information	Sample Information		Sample Information	Sample Information		Sample Information	Sample Information		Sample Information	Sample Information		Sample Information	Sample Information		Sample Information	Sample Information		Sample Information	Sample Information		Sample Information	Sample Information		Sample Information	Sample Information		Sample Information	Sample Information
Merge-Set Name:	pH 7.0		Merge-Set Name:	pH 7.0		Merge-Set Name:	pH 7.0		Merge-Set Name:	pH 7.0		Merge-Set Name:	pH 7.0		Merge-Set Name:	pH 7.0		Merge-Set Name:	pH 7.0		Merge-Set Name:	pH 7.0		Merge-Set Name:	pH 7.0		Merge-Set Name:	pH 7.0		Merge-Set Name:	pH 7.0		Merge-Set Name:	pH 7.0		Merge-Set Name:	pH 7.0		Merge-Set Name:	pH 7.0		Merge-Set Name:	pH 7.0		Merge-Set Name:	pH 7.0		Merge-Set Name:	pH 7.0
Run Name:	MyTarget_6_MyLigand (#41)		Run Name:	MyTarget_6_MyLigand (#41)		Run Name:	MyTarget_6_MyLigand (#41)		Run Name:	MyTarget_6_MyLigand (#41)		Run Name:	MyTarget_6_MyLigand (#41)		Run Name:	MyTarget_6_MyLigand (#41)		Run Name:	MyTarget_6_MyLigand (#41)		Run Name:	MyTarget_6_MyLigand (#41)		Run Name:	MyTarget_6_MyLigand (#41)		Run Name:	MyTarget_6_MyLigand (#41)		Run Name:	MyTarget_6_MyLigand (#41)		Run Name:	MyTarget_6_MyLigand (#41)		Run Name:	MyTarget_6_MyLigand (#41)		Run Name:	MyTarget_6_MyLigand (#41)		Run Name:	MyTarget_6_MyLigand (#41)		Run Name:	MyTarget_6_MyLigand (#41)		Run Name:	MyTarget_6_MyLigand (#43)
Date of Measurement:	2022-04-07 15:54:39		Date of Measurement:	2022-04-07 15:55:19		Date of Measurement:	2022-04-07 15:56:00		Date of Measurement:	2022-04-07 15:56:40		Date of Measurement:	2022-04-07 15:57:21		Date of Measurement:	2022-04-07 15:58:02		Date of Measurement:	2022-04-07 15:58:42		Date of Measurement:	2022-04-07 15:59:23		Date of Measurement:	2022-04-07 16:00:04		Date of Measurement:	2022-04-07 16:00:45		Date of Measurement:	2022-04-07 16:01:26		Date of Measurement:	2022-04-07 16:02:07		Date of Measurement:	2022-04-07 16:02:47		Date of Measurement:	2022-04-07 16:03:28		Date of Measurement:	2022-04-07 16:04:09		Date of Measurement:	2022-04-07 16:04:50		Date of Measurement:	2022-04-07 16:49:15
Capillary Type:	Unspecified container/capillary type		Capillary Type:	Unspecified container/capillary type		Capillary Type:	Unspecified container/capillary type		Capillary Type:	Unspecified container/capillary type		Capillary Type:	Unspecified container/capillary type		Capillary Type:	Unspecified container/capillary type		Capillary Type:	Unspecified container/capillary type		Capillary Type:	Unspecified container/capillary type		Capillary Type:	Unspecified container/capillary type		Capillary Type:	Unspecified container/capillary type		Capillary Type:	Unspecified container/capillary type		Capillary Type:	Unspecified container/capillary type		Capillary Type:	Unspecified container/capillary type		Capillary Type:	Unspecified container/capillary type		Capillary Type:	Unspecified container/capillary type		Capillary Type:	Unspecified container/capillary type		Capillary Type:	Unspecified container/capillary type
Capillary Position:	1		Capillary Position:	2		Capillary Position:	3		Capillary Position:	4		Capillary Position:	5		Capillary Position:	6		Capillary Position:	7		Capillary Position:	8		Capillary Position:	9		Capillary Position:	10		Capillary Position:	11		Capillary Position:	12		Capillary Position:	13		Capillary Position:	14		Capillary Position:	15		Capillary Position:	16		Capillary Position:	1
Ligand:	MyLigand		Ligand:	MyLigand		Ligand:	MyLigand		Ligand:	MyLigand		Ligand:	MyLigand		Ligand:	MyLigand		Ligand:	MyLigand		Ligand:	MyLigand		Ligand:	MyLigand		Ligand:	MyLigand		Ligand:	MyLigand		Ligand:	MyLigand		Ligand:	MyLigand		Ligand:	MyLigand		Ligand:	MyLigand		Ligand:	MyLigand		Ligand:	MyLigand
Ligand Concentration:	5.0043e-05		Ligand Concentration:	3.7576e-05		Ligand Concentration:	2.5737e-05		Ligand Concentration:	1.4542e-05		Ligand Concentration:	4.295e-06		Ligand Concentration:	4e-07		Ligand Concentration:	1.35e-08		Ligand Concentration:	4.6e-09		Ligand Concentration:	2e-09		Ligand Concentration:	9.2e-10		Ligand Concentration:	4.5e-10		Ligand Concentration:	2.2e-10		Ligand Concentration:	1.1e-10		Ligand Concentration:	5.4e-11		Ligand Concentration:	2.7e-11		Ligand Concentration:	1.3e-11		Ligand Concentration:	5.0043e-05
Target:	MyTarget		Target:	MyTarget		Target:	MyTarget		Target:	MyTarget		Target:	MyTarget		Target:	MyTarget		Target:	MyTarget		Target:	MyTarget		Target:	MyTarget		Target:	MyTarget		Target:	MyTarget		Target:	MyTarget		Target:	MyTarget		Target:	MyTarget		Target:	MyTarget		Target:	MyTarget		Target:	MyTarget
TargetConcentration:	6e-09		TargetConcentration:	6e-09		TargetConcentration:	6e-09		TargetConcentration:	6e-09		TargetConcentration:	6e-09		TargetConcentration:	6e-09		TargetConcentration:	6e-09		TargetConcentration:	6e-09		TargetConcentration:	6e-09		TargetConcentration:	6e-09		TargetConcentration:	6e-09		TargetConcentration:	6e-09		TargetConcentration:	6e-09		TargetConcentration:	6e-09		TargetConcentration:	6e-09		TargetConcentration:	6e-09		TargetConcentration:	6e-09
Measurement Settings	Measurement Settings		Measurement Settings	Measurement Settings		Measurement Settings	Measurement Settings		Measurement Settings	Measurement Settings		Measurement Settings	Measurement Settings		Measurement Settings	Measurement Settings		Measurement Settings	Measurement Settings		Measurement Settings	Measurement Settings		Measurement Settings	Measurement Settings		Measurement Settings	Measurement Settings		Measurement Settings	Measurement Settings		Measurement Settings	Measurement Settings		Measurement Settings	Measurement Settings		Measurement Settings	Measurement Settings		Measurement Settings	Measurement Settings		Measurement Settings	Measurement Settings		Measurement Settings	Measurement Settings
MST-Power:	Medium		MST-Power:	Medium		MST-Power:	Medium		MST-Power:	Medium		MST-Power:	Medium		MST-Power:	Medium		MST-Power:	Medium		MST-Power:	Medium		MST-Power:	Medium		MST-Power:	Medium		MST-Power:	Medium		MST-Power:	Medium		MST-Power:	Medium		MST-Power:	Medium		MST-Power:	Medium		MST-Power:	Medium		MST-Power:	Medium
Excitation-Power:	60		Excitation-Power:	60		Excitation-Power:	60		Excitation-Power:	60		Excitation-Power:	60		Excitation-Power:	60		Excitation-Power:	60		Excitation-Power:	60		Excitation-Power:	60		Excitation-Power:	60		Excitation-Power:	60		Excitation-Power:	60		Excitation-Power:	60		Excitation-Power:	60		Excitation-Power:	60		Excitation-Power:	60		Excitation-Power:	60
Excitation type:	Nano - BLUE		Excitation type:	Nano - BLUE		Excitation type:	Nano - BLUE		Excitation type:	Nano - BLUE		Excitation type:	Nano - BLUE		Excitation type:	Nano - BLUE		Excitation type:	Nano - BLUE		Excitation type:	Nano - BLUE		Excitation type:	Nano - BLUE		Excitation type:	Nano - BLUE		Excitation type:	Nano - BLUE		Excitation type:	Nano - BLUE		Excitation type:	Nano - BLUE		Excitation type:	Nano - BLUE		Excitation type:	Nano - BLUE		Excitation type:	Nano - BLUE		Excitation type:	Nano - BLUE
Thermostat Setpoint:	37		Thermostat Setpoint:	37		Thermostat Setpoint:	37		Thermostat Setpoint:	37		Thermostat Setpoint:	37		Thermostat Setpoint:	37		Thermostat Setpoint:	37		Thermostat Setpoint:	37		Thermostat Setpoint:	37		Thermostat Setpoint:	37		Thermostat Setpoint:	37		Thermostat Setpoint:	37		Thermostat Setpoint:	37		Thermostat Setpoint:	37		Thermostat Setpoint:	37		Thermostat Setpoint:	37		Thermostat Setpoint:	37
Included	Included		Included	Included		Included	Included		Included	Included		Included	Included		Included	Included		Included	Included		Included	Included		Included	Included		Included	Included		Included	Included		Included	Included		Included	Included		Included	Included		Included	Included		Included	Included		Included	Included
Time [s]	Normalized Fluorescence [-]		Time [s]	Normalized Fluorescence [-]		Time [s]	Normalized Fluorescence [-]		Time [s]	Normalized Fluorescence [-]		Time [s]	Normalized Fluorescence [-]		Time [s]	Normalized Fluorescence [-]		Time [s]	Normalized Fluorescence [-]		Time [s]	Normalized Fluorescence [-]		Time [s]	Normalized Fluorescence [-]		Time [s]	Normalized Fluorescence [-]		Time [s]	Normalized Fluorescence [-]		Time [s]	Normalized Fluorescence [-]		Time [s]	Normalized Fluorescence [-]		Time [s]	Normalized Fluorescence [-]		Time [s]	Normalized Fluorescence [-]		Time [s]	Normalized Fluorescence [-]		Time [s]	Normalized Fluorescence [-]
-3.57675	0.999823		-3.57675	0.997845		-3.57675	0.999466		-3.57675	1.00058		-3.57675	0.999816		-3.57675	0.998954		-3.57675	0.998416		-3.57675	0.998647		-3.57675	0.999275		-3.57675	0.999598		-3.57675	0.997822		-3.57675	0.997854		-3.57675	0.998776		-3.57675	0.999697		-3.57675	0.999559		-3.57675	0.997007		-3.57675	0.999907
-3.50223	0.999375		-3.50223	0.997074		-3.50223	0.998294		-3.50223	1.00048		-3.50223	0.999361		-3.50223	0.999137		-3.50223	0.998532		-3.50223	0.999248		-3.50223	0.998733		-3.50223	1.00036		-3.50223	0.999739		-3.50223	1.00069		-3.50223	0.999244		-3.50223	0.998835		-3.50223	0.999855		-3.50223	0.999397		-3.50223	0.998584
-3.42772	0.999665		-3.42772	0.998001		-3.42772	0.999193		-3.42772	0.999508		-3.42772	0.999221		-3.42772	1.00017		-3.42772	0.998735		-3.42772	0.999577		-3.42772	0.999907		-3.42772	0.999259		-3.42772	0.998786		-3.42772	0.999921		-3.42772	0.998944		-3.42772	1.00079		-3.42772	0.999483		-3.42772	0.999865		-3.42772	0.997855
-3.3532	0.998432		-3.3532	0.999113		-3.3532	0.999059		-3.3532	1.00047		-3.3532	1.00031		-3.3532	0.999448		-3.3532	0.999069		-3.3532	0.999844		-3.3532	0.998905		-3.3532	0.998016		-3.3532	0.999252		-3.3532	0.999489		-3.3532	1.0003		-3.3532	1.00102		-3.3532	1.00083		-3.3532	1.00067		-3.3532	0.998236
-3.27869	0.99934		-3.27869	0.99933		-3.27869	0.999386		-3.27869	1.00133		-3.27869	1.0008		-3.27869	0.999581		-3.27869	0.999822		-3.27869	1.00043		-3.27869	0.998286		-3.27869	0.999632		-3.27869	1.00033		-3.27869	0.999757		-3.27869	1.00126		-3.27869	0.998868		-3.27869	1.00135		-3.27869	1.00022		-3.27869	0.998361
-3.20417	0.999776		-3.20417	1.00023		-3.20417	1.00033		-3.20417	1.00112		-3.20417	1.00063		-3.20417	0.999513		-3.20417	1.00033		-3.20417	0.999425		-3.20417	0.999954		-3.20417	0.99946		-3.20417	0.999788		-3.20417	1.00073		-3.20417	1.00134		-3.20417	0.999163		-3.20417	1.00086		-3.20417	1.00061		-3.20417	0.998251
-3.12966	1.00061		-3.12966	1.00034		-3.12966	0.99868		-3.12966	1.00044		-3.12966	1.00054		-3.12966	1.0011		-3.12966	1.00153		-3.12966	0.999006		-3.12966	0.999541		-3.12966	0.998963		-3.12966	0.999878		-3.12966	0.999645		-3.12966	1.00044		-3.12966	1.00028		-3.12966	0.998539		-3.12966	1.0012		-3.12966	0.998609
-3.05514	0.999937		-3.05514	1.00112		-3.05514	0.99879		-3.05514	1.00029		-3.05514	1.00061		-3.05514	0.999209		-3.05514	1.00114		-3.05514	0.999148		-3.05514	1.00003		-3.05514	1.00088		-3.05514	0.999537		-3.05514	0.99915		-3.05514	0.998872		-3.05514	1.00052		-3.05514	0.998812		-3.05514	0.999661		-3.05514	0.999508
-2.98062	1.00028		-2.98062	1.00025		-2.98062	0.99912		-2.98062	0.998504		-2.98062	1.00113		-2.98062	0.999296		-2.98062	1.00106		-2.98062	1.00038		-2.98062	1.00024		-2.98062	1.00009		-2.98062	0.99918		-2.98062	1.00002		-2.98062	0.99904		-2.98062	1.00049		-2.98062	0.999412		-2.98062	0.999946		-2.98062	0.998939
-2.90611	1.0006		-2.90611	0.999167		-2.90611	1.00055		-2.90611	1.0004		-2.90611	1.00036		-2.90611	1.00088		-2.90611	1.00009		-2.90611	1.00067		-2.90611	1.0004		-2.90611	0.999299		-2.90611	0.999577		-2.90611	0.999125		-2.90611	1.00074		-2.90611	1.00105		-2.90611	0.999348		-2.90611	0.99955		-2.90611	1.00059
-2.83159	1.00009		-2.83159	1.0006		-2.83159	1.00023		-2.83159	0.999706		-2.83159	1.00053		-2.83159	0.999293		-2.83159	1.00102		-2.83159	0.998718		-2.83159	0.999985		-2.83159	0.999753		-2.83159	1.00064		-2.83159	1.00081		-2.83159	1.00014		-2.83159	0.999877		-2.83159	1.00048		-2.83159	0.999951		-2.83159	1.00033
-2.75708	1.00055		-2.75708	1.00064		-2.75708	0.999331		-2.75708	0.999778		-2.75708	0.999093		-2.75708	0.99887		-2.75708	1.00117		-2.75708	0.998531		-2.75708	0.999077		-2.75708	1.00128		-2.75708	1.00044		-2.75708	0.999875		-2.75708	0.999088		-2.75708	1.00078		-2.75708	1.00085		-2.75708	0.999868		-2.75708	1.0001
-2.68256	0.999677		-2.68256	1.0003		-2.68256	0.999264		-2.68256	1.00003		-2.68256	0.997703		-2.68256	0.999013		-2.68256	1.00091		-2.68256	0.999732		-2.68256	0.999913		-2.68256	1.00109		-2.68256	1.00092		-2.68256	0.99952		-2.68256	0.999547		-2.68256	0.99923		-2.68256	1.00179		-2.68256	0.998692		-2.68256	1.00098
-2.60805	0.999802		-2.60805	1.00014		-2.60805	0.999986		-2.60805	0.998654		-2.60805	0.998488		-2.60805	0.999435		-2.60805	0.999717		-2.60805	1.00036		-2.60805	1.0003		-2.60805	1.00032		-2.60805	1.00051		-2.60805	0.999598		-2.60805	0.999061		-2.60805	0.999655		-2.60805	1.00206		-2.60805	1.00013		-2.60805	1.00052
-2.53353	0.999232		-2.53353	0.999373		-2.53353	0.999016		-2.53353	0.998601		-2.53353	0.997494		-2.53353	1.00057		-2.53353	0.99886		-2.53353	0.999993		-2.53353	1.00141		-2.53353	1.00123		-2.53353	1.00065		-2.53353	1.00064		-2.53353	0.99895		-2.53353	0.99887		-2.53353	1.0014		-2.53353	0.999592		-2.53353	1.00042
-2.45901	1.00087		-2.45901	1.00053		-2.45901	1.00023		-2.45901	1.00063		-2.45901	0.99803		-2.45901	1.00141		-2.45901	0.999013		-2.45901	1.00077		-2.45901	1.0018		-2.45901	1.00098		-2.45901	1.00018		-2.45901	1.00125		-2.45901	0.998365		-2.45901	0.999372		-2.45901	1.00015		-2.45901	0.999424		-2.45901	0.998815
-2.3845	0.999217		-2.3845	1.00068		-2.3845	1.00088		-2.3845	1.00014		-2.3845	0.998999		-2.3845	1.0006		-2.3845	0.999541		-2.3845	1.00037		-2.3845	1.00098		-2.3845	1.00066		-2.3845	0.999003		-2.3845	1.00211		-2.3845	0.9985		-2.3845	0.999546		-2.3845	0.999547		-2.3845	1.00035		-2.3845	0.999568
-2.30998	0.998558		-2.30998	1.00102		-2.30998	1.00109		-2.30998	1.00013		-2.30998	0.999694		-2.30998	1.00101		-2.30998	0.999664		-2.30998	0.999877		-2.30998	1.0032		-2.30998	1.00055		-2.30998	0.99918		-2.30998	1.0009		-2.30998	0.999484		-2.30998	0.999732		-2.30998	0.999014		-2.30998	1.00165		-2.30998	1.00079
-2.23547	0.998915		-2.23547	1.00013		-2.23547	1.00166		-2.23547	0.999891		-2.23547	0.999199		-2.23547	1.00195		-2.23547	0.999305		-2.23547	1.00009		-2.23547	1.0027		-2.23547	0.999173		-2.23547	0.999332		-2.23547	1.00039		-2.23547	0.998074		-2.23547	0.999316		-2.23547	0.999846		-2.23547	1.00127		-2.23547	1.00077
-2.16095	1.00015		-2.16095	1.0004		-2.16095	1.00002		-2.16095	1.00037		-2.16095	1.00006		-2.16095	0.999882		-2.16095	0.998054		-2.16095	0.999967		-2.16095	1.00091		-2.16095	0.99905		-2.16095	0.999779		-2.16095	1.00053		-2.16095	0.999709		-2.16095	0.998906		-2.16095	1.00136		-2.16095	1.00063		-2.16095	1.00117
-2.08644	1.00074		-2.08644	0.999872		-2.08644	1.00048		-2.08644	1.00057		-2.08644	1.00128		-2.08644	0.99992		-2.08644	0.99946		-2.08644	1.00061		-2.08644	0.999844		-2.08644	1.00022		-2.08644	1.00128		-2.08644	1.00063		-2.08644	0.99985		-2.08644	1.00018		-2.08644	1.00131		-2.08644	0.999841		-2.08644	1.00111
-2.01192	1.00106		-2.01192	0.999453		-2.01192	1.00024		-2.01192	1.00045		-2.01192	1.00262		-2.01192	0.999373		-2.01192	0.998869		-2.01192	1.00235		-2.01192	0.999597		-2.01192	1.00064		-2.01192	1.00201		-2.01192	1.00108		-2.01192	1.00061		-2.01192	1.00049		-2.01192	1.00114		-2.01192	0.999013		-2.01192	1.00118
-1.93741	1.00202		-1.93741	0.999248		-1.93741	0.999484		-1.93741	1.00084		-1.93741	1.00216		-1.93741	1.00092		-1.93741	0.999419		-1.93741	1.0001		-1.93741	0.999541		-1.93741	1.00071		-1.93741	1.00148		-1.93741	1.0001		-1.93741	1.00062		-1.93741	1.00064		-1.93741	0.999222		-1.93741	0.999256		-1.93741	1.00005
-1.86289	1.00033		-1.86289	0.998859		-1.86289	0.998557		-1.86289	1.00059		-1.86289	0.999816		-1.86289	1.00006		-1.86289	0.998654		-1.86289	1.00059		-1.86289	1.00007		-1.86289	1.0006		-1.86289	1.00162		-1.86289	1.00114		-1.86289	0.999415		-1.86289	1.00022		-1.86289	1.0002		-1.86289	1.00027		-1.86289	1.00009
-1.78837	0.999586		-1.78837	0.999059		-1.78837	0.99901		-1.78837	0.998849		-1.78837	0.999261		-1.78837	0.999749		-1.78837	0.999705		-1.78837	1.00037		-1.78837	1.0005		-1.78837	1.0003		-1.78837	1.00095		-1.78837	1.00139		-1.78837	0.999778		-1.78837	0.999838		-1.78837	1.00099		-1.78837	1.0006		-1.78837	0.999635
-1.71386	1.00283		-1.71386	1.0007		-1.71386	0.999282		-1.71386	0.999552		-1.71386	0.99837		-1.71386	1.00142		-1.71386	1.00054		-1.71386	0.999189		-1.71386	1.00165		-1.71386	0.99929		-1.71386	0.999469		-1.71386	1.00091		-1.71386	0.999871		-1.71386	1.00043		-1.71386	1.00095		-1.71386	0.99964		-1.71386	0.999596
-1.63934	1.00184		-1.63934	1.00023		-1.63934	0.999771		-1.63934	0.99738		-1.63934	0.999277		-1.63934	1.00073		-1.63934	1.00027		-1.63934	0.99918		-1.63934	1.00049		-1.63934	1.00096		-1.63934	0.998972		-1.63934	1.00191		-1.63934	1.0004		-1.63934	0.999334		-1.63934	1.00098		-1.63934	1.00037		-1.63934	0.99883
-1.56483	1.00218		-1.56483	1.00024		-1.56483	0.997454		-1.56483	0.998877		-1.56483	0.999286		-1.56483	0.999643		-1.56483	0.998935		-1.56483	0.999754		-1.56483	1.00096		-1.56483	0.999528		-1.56483	0.999934		-1.56483	1.00046		-1.56483	0.99907		-1.56483	0.998493		-1.56483	1.00042		-1.56483	0.999574		-1.56483	0.999983
-1.49031	1.00175		-1.49031	0.998698		-1.49031	0.998768		-1.49031	0.999269		-1.49031	0.999445		-1.49031	1.00103		-1.49031	0.999153		-1.49031	0.999215		-1.49031	1.00106		-1.49031	1.00023		-1.49031	0.999993		-1.49031	0.999648		-1.49031	0.99862		-1.49031	0.998198		-1.49031	0.999234		-1.49031	0.997691		-1.49031	0.999205
-1.4158	1.00101		-1.4158	0.999766		-1.4158	0.999973		-1.4158	0.998877		-1.4158	1.00105		-1.4158	1.00016		-1.4158	1.00115		-1.4158	1.0011		-1.4158	1.00068		-1.4158	1.00121		-1.4158	0.998185		-1.4158	1.00165		-1.4158	0.997615		-1.4158	0.998189		-1.4158	0.999872		-1.4158	0.998644		-1.4158	0.998
-1.34128	1.0001		-1.34128	0.999196		-1.34128	0.999215		-1.34128	0.997879		-1.34128	1.00138		-1.34128	1.00068		-1.34128	1.00094		-1.34128	1.00126		-1.34128	1.00014		-1.34128	1.00091		-1.34128	0.999258		-1.34128	1.00173		-1.34128	0.998341		-1.34128	0.998894		-1.34128	0.997921		-1.34128	0.999328		-1.34128	0.998736
-1.26677	1.00107		-1.26677	0.998317		-1.26677	0.999677		-1.26677	0.998278		-1.26677	1.00142		-1.26677	1.00087		-1.26677	1.00074		-1.26677	0.999267		-1.26677	0.999027		-1.26677	1.00144		-1.26677	1.00124		-1.26677	1.00225		-1.26677	0.997846		-1.26677	0.999059		-1.26677	0.99899		-1.26677	0.997232		-1.26677	0.997634
-1.19225	1.00129		-1.19225	0.998258		-1.19225	0.999184		-1.19225	0.998033		-1.19225	1.00061		-1.19225	1.00188		-1.19225	0.999392		-1.19225	0.999964		-1.19225	0.998542		-1.19225	0.999043		-1.19225	0.999884		-1.19225	1.0014		-1.19225	0.999208		-1.19225	0.999036		-1.19225	1.00116		-1.19225	0.99839		-1.19225	0.996705
-1.11773	0.999867		-1.11773	0.998404		-1.11773	1.00008		-1.11773	0.999809		-1.11773	0.999847		-1.11773	1.00119		-1.11773	0.999681		-1.11773	1.00087		-1.11773	0.99868		-1.11773	0.999978		-1.11773	1.00025		-1.11773	1.00089		-1.11773	0.999223		-1.11773	0.998153		-1.11773	0.999658		-1.11773	0.999247		-1.11773	0.997928
-1.04322	0.998901		-1.04322	0.99913		-1.04322	0.999814		-1.04322	1.00009		-1.04322	1.00106		-1.04322	1.00126		-1.04322	0.998872		-1.04322	0.99998		-1.04322	0.999794		-1.04322	1.00057		-1.04322	0.998116		-1.04322	1.0017		-1.04322	1.00126		-1.04322	0.99908		-1.04322	0.999755		-1.04322	0.999697		-1.04322	0.997661
-0.968703	0.998971		-0.968703	0.997621		-0.968703	0.99871		-0.968703	1.00084		-0.968703	0.999392		-0.968703	1.00148		-0.968703	0.998048		-0.968703	0.999467		-0.968703	0.999215		-0.968703	1.00039		-0.968703	0.998786		-0.968703	1.0023		-0.968703	1.00048		-0.968703	1.00045		-0.968703	1.00022		-0.968703	1.00033		-0.968703	0.998397
-0.894187	0.998939		-0.894187	0.998029		-0.894187	0.998365		-0.894187	0.999338		-0.894187	0.9988		-0.894187	0.999771		-0.894187	0.99818		-0.894187	0.99997		-0.894187	0.999813		-0.894187	0.998914		-0.894187	0.997704		-0.894187	1.00134		-0.894187	1.00019		-0.894187	1.00057		-0.894187	0.998255		-0.894187	0.997895		-0.894187	0.997955
-0.819672	0.998713		-0.819672	0.9995		-0.819672	0.998811		-0.819672	0.999979		-0.819672	0.998544		-0.819672	1.0008		-0.819672	0.997965		-0.819672	1.00087		-0.819672	0.99981		-0.819672	0.999321		-0.819672	0.998206		-0.819672	1.00022		-0.819672	1.00009		-0.819672	1.00138		-0.819672	0.998454		-0.819672	0.997811		-0.819672	0.998712
-0.745156	0.998798		-0.745156	0.99962		-0.745156	0.998771		-0.745156	1.00112		-0.745156	0.999214		-0.745156	1.00032		-0.745156	0.999129		-0.745156	1.00122		-0.745156	0.998667		-0.745156	0.99888		-0.745156	0.99892		-0.745156	1.00106		-0.745156	0.999148		-0.745156	1.00111		-0.745156	0.999102		-0.745156	0.999328		-0.745156	0.997292
-0.67064	1.00095		-0.67064	1.00001		-0.67064	0.999056		-0.67064	1.00088		-0.67064	0.999052		-0.67064	1.00016		-0.67064	1.00074		-0.67064	1.00054		-0.67064	0.999741		-0.67064	0.999071		-0.67064	0.999		-0.67064	0.999757		-0.67064	0.998254		-0.67064	0.999617		-0.67064	1.00015		-0.67064	0.999931		-0.67064	0.997531
-0.596125	1.00146		-0.596125	0.99916		-0.596125	0.997946		-0.596125	0.999116		-0.596125	0.998563		-0.596125	0.998492		-0.596125	1.00014		-0.596125	1.00002		-0.596125	1.0002		-0.596125	1.00085		-0.596125	0.999614		-0.596125	1.00178		-0.596125	0.997579		-0.596125	1.00047		-0.596125	0.999374		-0.596125	0.99946		-0.596125	0.997673
-0.521609	1.00114		-0.521609	0.998474		-0.521609	0.997723		-0.521609	0.998846		-0.521609	1.00029		-0.521609	0.999556		-0.521609	1.00031		-0.521609	1.00067		-0.521609	1.00094		-0.521609	1.00051		-0.521609	1.00029		-0.521609	1.00126		-0.521609	0.997147		-0.521609	0.999676		-0.521609	0.999582		-0.521609	1.00001		-0.521609	0.996941
-0.447094	1.0009		-0.447094	0.998965		-0.447094	0.997643		-0.447094	1.00027		-0.447094	0.9987		-0.447094	0.999923		-0.447094	1.00161		-0.447094	1.00032		-0.447094	1.00086		-0.447094	1.00155		-0.447094	0.998154		-0.447094	1.00119		-0.447094	0.997852		-0.447094	0.999478		-0.447094	1.00083		-0.447094	0.999963		-0.447094	0.998021
-0.372578	0.999721		-0.372578	0.99896		-0.372578	0.998683		-0.372578	1.00089		-0.372578	0.999252		-0.372578	1.00134		-0.372578	1.00081		-0.372578	0.998928		-0.372578	1.00037		-0.372578	1.00068		-0.372578	0.998073		-0.372578	1.00103		-0.372578	0.997366		-0.372578	0.999345		-0.372578	1.00143		-0.372578	1.00204		-0.372578	0.998215
-0.298063	0.999662		-0.298063	0.998814		-0.298063	0.997912		-0.298063	1.00086		-0.298063	1.00039		-0.298063	0.999938		-0.298063	0.999437		-0.298063	0.999051		-0.298063	1.0005		-0.298063	1.00061		-0.298063	0.999739		-0.298063	1.00043		-0.298063	0.997594		-0.298063	0.998959		-0.298063	1.00189		-0.298063	1.001		-0.298063	0.999371
-0.223547	0.999328		-0.223547	0.998878		-0.223547	0.998096		-0.223547	1.00007		-0.223547	0.999498		-0.223547	0.999386		-0.223547	0.999266		-0.223547	0.999496		-0.223547	1.00028		-0.223547	0.999611		-0.223547	1.00052		-0.223547	1.00107		-0.223547	0.998197		-0.223547	0.999201		-0.223547	1.00181		-0.223547	0.999187		-0.223547	0.998127
-0.149031	1.00014		-0.149031	0.998111		-0.149031	0.998059		-0.149031	1.00087		-0.149031	1.0006		-0.149031	0.999209		-0.149031	0.996959		-0.149031	0.99775		-0.149031	1.00019		-0.149031	0.999127		-0.149031	0.999766		-0.149031	1.00094		-0.149031	0.999871		-0.149031	0.998935		-0.149031	1.00188		-0.149031	0.997505		-0.149031	0.998185
-0.0745156	1.00007		-0.0745156	0.997411		-0.0745156	0.999016		-0.0745156	1.00103		-0.0745156	1.00003		-0.0745156	1.00003		-0.0745156	0.9972		-0.0745156	0.998451		-0.0745156	1.00066		-0.0745156	0.999213		-0.0745156	0.999981		-0.0745156	0.999903		-0.0745156	0.998152		-0.0745156	0.998177		-0.0745156	1.00309		-0.0745156	0.998725		-0.0745156	0.998388
0	0.998804		0	0.996574		0	0.997136		0	0.998717		0	0.99742		0	0.997474		0	0.998019		0	0.996276		0	1.00017		0	0.999728		0	0.998858		0	0.997981		0	0.998191		0	0.999083		0	1.00026		0	0.997856		0	0.99702
0.0745156	0.993598		0.0745156	0.990766		0.0745156	0.990732		0.0745156	0.993701		0.0745156	0.991246		0.0745156	0.992021		0.0745156	0.992271		0.0745156	0.991449		0.0745156	0.993043		0.0745156	0.994402		0.0745156	0.994208		0.0745156	0.99406		0.0745156	0.993778		0.0745156	0.993524		0.0745156	0.9942		0.0745156	0.993248		0.0745156	0.989685
0.149031	0.990269		0.149031	0.986554		0.149031	0.989586		0.149031	0.990462		0.149031	0.98656		0.149031	0.988738		0.149031	0.990304		0.149031	0.989387		0.149031	0.989904		0.149031	0.99125		0.149031	0.993095		0.149031	0.990388		0.149031	0.99181		0.149031	0.991686		0.149031	0.99265		0.149031	0.992151		0.149031	0.985532
0.223547	0.989505		0.223547	0.986931		0.223547	0.987139		0.223547	0.988529		0.223547	0.985559		0.223547	0.988188		0.223547	0.98836		0.223547	0.986251		0.223547	0.988781		0.223547	0.989837		0.223547	0.990796		0.223547	0.989829		0.223547	0.989605		0.223547	0.990553		0.223547	0.990611		0.223547	0.989548		0.223547	0.984034
0.298062	0.986328		0.298062	0.985837		0.298062	0.986365		0.298062	0.986843		0.298062	0.985354		0.298062	0.987257		0.298062	0.985566		0.298062	0.987116		0.298062	0.988674		0.298062	0.987006		0.298062	0.987207		0.298062	0.989216		0.298062	0.987442		0.298062	0.989419		0.298062	0.989088		0.298062	0.988838		0.298062	0.98457
0.372578	0.98347		0.372578	0.984227		0.372578	0.983983		0.372578	0.985701		0.372578	0.98297		0.372578	0.986922		0.372578	0.98378		0.372578	0.984025		0.372578	0.986396		0.372578	0.986664		0.372578	0.986333		0.372578	0.98888		0.372578	0.984595		0.372578	0.987254		0.372578	0.987916		0.372578	0.988415		0.372578	0.983153
0.447093	0.983198		0.447093	0.982464		0.447093	0.984035		0.447093	0.984599		0.447093	0.982371		0.447093	0.983555		0.447093	0.983786		0.447093	0.982934		0.447093	0.984897		0.447093	0.985368		0.447093	0.985849		0.447093	0.988199		0.447093	0.984919		0.447093	0.986023		0.447093	0.987005		0.447093	0.987336		0.447093	0.982923
0.521609	0.982158		0.521609	0.981276		0.521609	0.982075		0.521609	0.983648		0.521609	0.98144		0.521609	0.982788		0.521609	0.982861		0.521609	0.982121		0.521609	0.98515		0.521609	0.985973		0.521609	0.983854		0.521609	0.98907		0.521609	0.984376		0.521609	0.985259		0.521609	0.986061		0.521609	0.985987		0.521609	0.981933
0.596125	0.981441		0.596125	0.980265		0.596125	0.981139		0.596125	0.982587		0.596125	0.979707		0.596125	0.980389		0.596125	0.982111		0.596125	0.980972		0.596125	0.985698		0.596125	0.984714		0.596125	0.983761		0.596125	0.985883		0.596125	0.983575		0.596125	0.984979		0.596125	0.985188		0.596125	0.98599		0.596125	0.980038
0.67064	0.980949		0.67064	0.979074		0.67064	0.980733		0.67064	0.980764		0.67064	0.98004		0.67064	0.979557		0.67064	0.981962		0.67064	0.980737		0.67064	0.9848		0.67064	0.984647		0.67064	0.982868		0.67064	0.986639		0.67064	0.984382		0.67064	0.98474		0.67064	0.985133		0.67064	0.985114		0.67064	0.978431
0.745156	0.980191		0.745156	0.97733		0.745156	0.979861		0.745156	0.979483		0.745156	0.97918		0.745156	0.979269		0.745156	0.981926		0.745156	0.981443		0.745156	0.983626		0.745156	0.982781		0.745156	0.979695		0.745156	0.984475		0.745156	0.983751		0.745156	0.98445		0.745156	0.983266		0.745156	0.98417		0.745156	0.978912
0.819672	0.978191		0.819672	0.97779		0.819672	0.97803		0.819672	0.979442		0.819672	0.979841		0.819672	0.979601		0.819672	0.98078		0.819672	0.980001		0.819672	0.983523		0.819672	0.982275		0.819672	0.981671		0.819672	0.984167		0.819672	0.983446		0.819672	0.983359		0.819672	0.985405		0.819672	0.984574		0.819672	0.977275
0.894187	0.977541		0.894187	0.978023		0.894187	0.977186		0.894187	0.977653		0.894187	0.979043		0.894187	0.978266		0.894187	0.979947		0.894187	0.979398		0.894187	0.981761		0.894187	0.981282		0.894187	0.981419		0.894187	0.984443		0.894187	0.98239		0.894187	0.982456		0.894187	0.985376		0.894187	0.982014		0.894187	0.976884
0.968703	0.976334		0.968703	0.977245		0.968703	0.976391		0.968703	0.977829		0.968703	0.977426		0.968703	0.977369		0.968703	0.978785		0.968703	0.980708		0.968703	0.981614		0.968703	0.982253		0.968703	0.981075		0.968703	0.98278		0.968703	0.982807		0.968703	0.982736		0.968703	0.984409		0.968703	0.981346		0.968703	0.976748
1.04322	0.974496		1.04322	0.97535		1.04322	0.974406		1.04322	0.976762		1.04322	0.976379		1.04322	0.976826		1.04322	0.978788		1.04322	0.979372		1.04322	0.98008		1.04322	0.981748		1.04322	0.980638		1.04322	0.981092		1.04322	0.982072		1.04322	0.981813		1.04322	0.984081		1.04322	0.98053		1.04322	0.975277
1.11773	0.975892		1.11773	0.97531		1.11773	0.974446		1.11773	0.975415		1.11773	0.974992		1.11773	0.975628		1.11773	0.979335		1.11773	0.978533		1.11773	0.979551		1.11773	0.979946		1.11773	0.979903		1.11773	0.981689		1.11773	0.981706		1.11773	0.982353		1.11773	0.984705		1.11773	0.982476		1.11773	0.974641
1.19225	0.975345		1.19225	0.974874		1.19225	0.971877		1.19225	0.975327		1.19225	0.975332		1.19225	0.975057		1.19225	0.977722		1.19225	0.97851		1.19225	0.980087		1.19225	0.979965		1.19225	0.979124		1.19225	0.980563		1.19225	0.97966		1.19225	0.982471		1.19225	0.983064		1.19225	0.979331		1.19225	0.975004
1.26677	0.974771		1.26677	0.975388		1.26677	0.971574		1.26677	0.97254		1.26677	0.973926		1.26677	0.974387		1.26677	0.976928		1.26677	0.978249		1.26677	0.979567		1.26677	0.977263		1.26677	0.980346		1.26677	0.980084		1.26677	0.979018		1.26677	0.980978		1.26677	0.982197		1.26677	0.980023		1.26677	0.973448
1.34128	0.974185		1.34128	0.974089		1.34128	0.971883		1.34128	0.972722		1.34128	0.974039		1.34128	0.973719		1.34128	0.976191		1.34128	0.978097		1.34128	0.979742		1.34128	0.976221		1.34128	0.979068		1.34128	0.980644		1.34128	0.980917		1.34128	0.981341		1.34128	0.982379		1.34128	0.979616		1.34128	0.970903
1.4158	0.972856		1.4158	0.974148		1.4158	0.971103		1.4158	0.973199		1.4158	0.974466		1.4158	0.972748		1.4158	0.975426		1.4158	0.975377		1.4158	0.978932		1.4158	0.974873		1.4158	0.978091		1.4158	0.980464		1.4158	0.978799		1.4158	0.980019		1.4158	0.981019		1.4158	0.977922		1.4158	0.970204
1.49031	0.97273		1.49031	0.973851		1.49031	0.970657		1.49031	0.972496		1.49031	0.974659		1.49031	0.97344		1.49031	0.974026		1.49031	0.974971		1.49031	0.977695		1.49031	0.97524		1.49031	0.979822		1.49031	0.979817		1.49031	0.978964		1.49031	0.979889		1.49031	0.979549		1.49031	0.977778		1.49031	0.969362
1.56483	0.971814		1.56483	0.972755		1.56483	0.96914		1.56483	0.973017		1.56483	0.974263		1.56483	0.973061		1.56483	0.974125		1.56483	0.973864		1.56483	0.97589		1.56483	0.973612		1.56483	0.978318		1.56483	0.980072		1.56483	0.978436		1.56483	0.978974		1.56483	0.980759		1.56483	0.976516		1.56483	0.970191
1.63934	0.972033		1.63934	0.972965		1.63934	0.968776		1.63934	0.970701		1.63934	0.97435		1.63934	0.971581		1.63934	0.972978		1.63934	0.973196		1.63934	0.976168		1.63934	0.973892		1.63934	0.976875		1.63934	0.978629		1.63934	0.977169		1.63934	0.979629		1.63934	0.981465		1.63934	0.978072		1.63934	0.969271
1.71386	0.970636		1.71386	0.971727		1.71386	0.968388		1.71386	0.971398		1.71386	0.973341		1.71386	0.972996		1.71386	0.972775		1.71386	0.973506		1.71386	0.974535		1.71386	0.975286		1.71386	0.976543		1.71386	0.97991		1.71386	0.978222		1.71386	0.979302		1.71386	0.980187		1.71386	0.978515		1.71386	0.968542
1.78837	0.970411		1.78837	0.970329		1.78837	0.968495		1.78837	0.970836		1.78837	0.972396		1.78837	0.971308		1.78837	0.97388		1.78837	0.973964		1.78837	0.973793		1.78837	0.975444		1.78837	0.976478		1.78837	0.978962		1.78837	0.977398		1.78837	0.978142		1.78837	0.978432		1.78837	0.977919		1.78837	0.966956
1.86289	0.969436		1.86289	0.969919		1.86289	0.967162		1.86289	0.96942		1.86289	0.971592		1.86289	0.972754		1.86289	0.971435		1.86289	0.973929		1.86289	0.973899		1.86289	0.974037		1.86289	0.976457		1.86289	0.977693		1.86289	0.976258		1.86289	0.97908		1.86289	0.978931		1.86289	0.978407		1.86289	0.967625
1.93741	0.968774		1.93741	0.969627		1.93741	0.968318		1.93741	0.969003		1.93741	0.969202		1.93741	0.971764		1.93741	0.971217		1.93741	0.973884		1.93741	0.972597		1.93741	0.974194		1.93741	0.976485		1.93741	0.976941		1.93741	0.975813		1.93741	0.978661		1.93741	0.976704		1.93741	0.977244		1.93741	0.96688
2.01192	0.96823		2.01192	0.968161		2.01192	0.967948		2.01192	0.96809		2.01192	0.968532		2.01192	0.970014		2.01192	0.970766		2.01192	0.973203		2.01192	0.974365		2.01192	0.973177		2.01192	0.97552		2.01192	0.977059		2.01192	0.975679		2.01192	0.979877		2.01192	0.976569		2.01192	0.976672		2.01192	0.966175
2.08644	0.966666		2.08644	0.968545		2.08644	0.966935		2.08644	0.9661		2.08644	0.96938		2.08644	0.969458		2.08644	0.971975		2.08644	0.974968		2.08644	0.975477		2.08644	0.972733		2.08644	0.974112		2.08644	0.977591		2.08644	0.9763		2.08644	0.978918		2.08644	0.976944		2.08644	0.975655		2.08644	0.967958
2.16095	0.967208		2.16095	0.968		2.16095	0.968131		2.16095	0.966982		2.16095	0.968707		2.16095	0.968996		2.16095	0.971715		2.16095	0.974145		2.16095	0.974725		2.16095	0.972076		2.16095	0.974989		2.16095	0.976375		2.16095	0.977242		2.16095	0.978216		2.16095	0.975825		2.16095	0.97526		2.16095	0.966704
2.23547	0.966552		2.23547	0.968139		2.23547	0.967431		2.23547	0.967295		2.23547	0.968426		2.23547	0.967785		2.23547	0.972274		2.23547	0.973209		2.23547	0.973846		2.23547	0.972884		2.23547	0.974869		2.23547	0.976705		2.23547	0.976492		2.23547	0.978266		2.23547	0.97555		2.23547	0.977724		2.23547	0.968384
2.30998	0.967061		2.30998	0.968832		2.30998	0.968171		2.30998	0.966423		2.30998	0.966902		2.30998	0.968077		2.30998	0.97044		2.30998	0.972393		2.30998	0.973317		2.30998	0.972193		2.30998	0.973355		2.30998	0.976512		2.30998	0.975574		2.30998	0.977339		2.30998	0.975078		2.30998	0.976627		2.30998	0.966889
2.3845	0.966982		2.3845	0.96528		2.3845	0.965899		2.3845	0.967547		2.3845	0.966775		2.3845	0.967745		2.3845	0.969604		2.3845	0.972348		2.3845	0.973161		2.3845	0.972875		2.3845	0.975207		2.3845	0.975281		2.3845	0.974476		2.3845	0.978632		2.3845	0.975966		2.3845	0.974429		2.3845	0.964374
2.45901	0.966338		2.45901	0.966383		2.45901	0.966303		2.45901	0.966191		2.45901	0.966631		2.45901	0.967435		2.45901	0.969602		2.45901	0.971473		2.45901	0.973442		2.45901	0.972464		2.45901	0.973467		2.45901	0.976235		2.45901	0.975358		2.45901	0.978027		2.45901	0.977419		2.45901	0.974702		2.45901	0.964595
2.53353	0.965922		2.53353	0.965492		2.53353	0.96644		2.53353	0.965817		2.53353	0.964668		2.53353	0.966364		2.53353	0.969237		2.53353	0.969763		2.53353	0.970766		2.53353	0.973846		2.53353	0.972688		2.53353	0.976478		2.53353	0.975187		2.53353	0.976802		2.53353	0.974671		2.53353	0.973985		2.53353	0.964637
2.60805	0.964719		2.60805	0.964382		2.60805	0.966856		2.60805	0.966021		2.60805	0.964338		2.60805	0.966339		2.60805	0.968025		2.60805	0.970986		2.60805	0.969734		2.60805	0.971897		2.60805	0.97253		2.60805	0.976164		2.60805	0.974577		2.60805	0.974864		2.60805	0.975292		2.60805	0.973611		2.60805	0.963036
2.68256	0.964303		2.68256	0.963694		2.68256	0.965443		2.68256	0.966216		2.68256	0.964017		2.68256	0.966656		2.68256	0.968192		2.68256	0.969847		2.68256	0.970751		2.68256	0.972853		2.68256	0.971519		2.68256	0.975865		2.68256	0.974449		2.68256	0.973831		2.68256	0.975093		2.68256	0.972831		2.68256	0.963172
2.75708	0.964163		2.75708	0.964589		2.75708	0.964113		2.75708	0.965083		2.75708	0.963141		2.75708	0.967081		2.75708	0.968094		2.75708	0.967692		2.75708	0.969352		2.75708	0.972304		2.75708	0.971683		2.75708	0.975265		2.75708	0.972136		2.75708	0.974126		2.75708	0.97354		2.75708	0.973035		2.75708	0.962975
2.83159	0.964104		2.83159	0.962807		2.83159	0.965168		2.83159	0.964832		2.83159	0.964347		2.83159	0.964899		2.83159	0.967927		2.83159	0.968489		2.83159	0.969884		2.83159	0.970207		2.83159	0.969868		2.83159	0.974758		2.83159	0.971532		2.83159	0.974876		2.83159	0.973748		2.83159	0.972495		2.83159	0.962576
2.90611	0.96495		2.90611	0.962923		2.90611	0.964431		2.90611	0.964031		2.90611	0.964509		2.90611	0.964747		2.90611	0.967539		2.90611	0.968595		2.90611	0.970075		2.90611	0.970392		2.90611	0.970514		2.90611	0.974873		2.90611	0.972409		2.90611	0.973501		2.90611	0.974849		2.90611	0.97242		2.90611	0.961332
2.98062	0.962918		2.98062	0.961452		2.98062	0.962006		2.98062	0.963554		2.98062	0.963154		2.98062	0.966094		2.98062	0.967294		2.98062	0.967872		2.98062	0.968939		2.98062	0.969186		2.98062	0.972353		2.98062	0.975616		2.98062	0.972594		2.98062	0.973244		2.98062	0.974483		2.98062	0.973889		2.98062	0.960569
3.05514	0.96365		3.05514	0.96276		3.05514	0.961551		3.05514	0.963749		3.05514	0.96411		3.05514	0.96529		3.05514	0.967968		3.05514	0.966882		3.05514	0.969192		3.05514	0.969029		3.05514	0.972179		3.05514	0.97441		3.05514	0.971824		3.05514	0.972506		3.05514	0.975169		3.05514	0.973134		3.05514	0.961901
3.12966	0.962936		3.12966	0.963418		3.12966	0.961089		3.12966	0.963347		3.12966	0.964609		3.12966	0.964511		3.12966	0.966299		3.12966	0.96613		3.12966	0.969449		3.12966	0.969929		3.12966	0.97056		3.12966	0.973754		3.12966	0.971815		3.12966	0.973645		3.12966	0.974398		3.12966	0.972295		3.12966	0.963015
3.20417	0.962614		3.20417	0.963399		3.20417	0.960575		3.20417	0.96233		3.20417	0.963877		3.20417	0.963236		3.20417	0.966407		3.20417	0.96683		3.20417	0.96999		3.20417	0.968689		3.20417	0.97106		3.20417	0.972622		3.20417	0.972394		3.20417	0.974746		3.20417	0.973443		3.20417	0.972606		3.20417	0.961988
3.27869	0.96168		3.27869	0.963243		3.27869	0.961021		3.27869	0.962136		3.27869	0.963468		3.27869	0.962705		3.27869	0.965995		3.27869	0.967437		3.27869	0.969274		3.27869	0.96785		3.27869	0.971252		3.27869	0.972488		3.27869	0.971413		3.27869	0.972819		3.27869	0.974568		3.27869	0.972333		3.27869	0.960357
3.3532	0.962028		3.3532	0.961862		3.3532	0.959664		3.3532	0.962377		3.3532	0.963892		3.3532	0.964114		3.3532	0.965048		3.3532	0.96796		3.3532	0.967721		3.3532	0.969692		3.3532	0.971795		3.3532	0.972178		3.3532	0.970773		3.3532	0.972887		3.3532	0.97281		3.3532	0.973284		3.3532	0.96184
3.42772	0.962303		3.42772	0.96239		3.42772	0.959878		3.42772	0.962123		3.42772	0.963428		3.42772	0.962857		3.42772	0.965063		3.42772	0.968302		3.42772	0.9682		3.42772	0.969448		3.42772	0.97136		3.42772	0.973564		3.42772	0.9702		3.42772	0.972244		3.42772	0.973563		3.42772	0.973752		3.42772	0.959276
3.50223	0.961457		3.50223	0.962173		3.50223	0.959116		3.50223	0.961536		3.50223	0.961776		3.50223	0.964862		3.50223	0.96589		3.50223	0.967808		3.50223	0.966739		3.50223	0.969445		3.50223	0.971326		3.50223	0.972504		3.50223	0.970008		3.50223	0.974949		3.50223	0.973056		3.50223	0.974144		3.50223	0.958819
3.57675	0.960842		3.57675	0.961751		3.57675	0.958814		3.57675	0.961781		3.57675	0.960926		3.57675	0.964291		3.57675	0.964628		3.57675	0.966695		3.57675	0.965146		3.57675	0.969559		3.57675	0.970783		3.57675	0.971848		3.57675	0.969438		3.57675	0.973645		3.57675	0.971175		3.57675	0.97356		3.57675	0.959182
3.65126	0.95994		3.65126	0.961841		3.65126	0.960037		3.65126	0.961781		3.65126	0.961356		3.65126	0.962807		3.65126	0.965258		3.65126	0.966175		3.65126	0.966012		3.65126	0.968955		3.65126	0.970182		3.65126	0.971201		3.65126	0.970524		3.65126	0.972474		3.65126	0.972532		3.65126	0.97326		3.65126	0.958199
3.72578	0.959372		3.72578	0.96198		3.72578	0.960074		3.72578	0.96153		3.72578	0.958557		3.72578	0.961644		3.72578	0.964598		3.72578	0.965685		3.72578	0.965192		3.72578	0.96815		3.72578	0.970399		3.72578	0.97316		3.72578	0.970828		3.72578	0.973034		3.72578	0.972485		3.72578	0.97219		3.72578	0.958386
3.8003	0.957595		3.8003	0.960764		3.8003	0.959682		3.8003	0.960547		3.8003	0.958109		3.8003	0.96021		3.8003	0.964574		3.8003	0.966459		3.8003	0.96743		3.8003	0.967221		3.8003	0.969841		3.8003	0.971985		3.8003	0.969276		3.8003	0.973026		3.8003	0.974164		3.8003	0.971755		3.8003	0.958825
3.87481	0.95852		3.87481	0.959486		3.87481	0.959976		3.87481	0.960607		3.87481	0.958894		3.87481	0.960253		3.87481	0.964553		3.87481	0.966398		3.87481	0.966876		3.87481	0.966259		3.87481	0.969186		3.87481	0.971123		3.87481	0.969049		3.87481	0.971347		3.87481	0.97284		3.87481	0.971128		3.87481	0.957248
3.94933	0.959112		3.94933	0.959071		3.94933	0.960642		3.94933	0.958837		3.94933	0.958993		3.94933	0.96002		3.94933	0.965096		3.94933	0.966466		3.94933	0.966901		3.94933	0.966314		3.94933	0.968581		3.94933	0.969926		3.94933	0.969438		3.94933	0.970939		3.94933	0.972432		3.94933	0.970121		3.94933	0.956988
4.02384	0.958795		4.02384	0.957393		4.02384	0.960214		4.02384	0.959282		4.02384	0.960003		4.02384	0.960101		4.02384	0.963717		4.02384	0.96683		4.02384	0.966332		4.02384	0.967758		4.02384	0.970014		4.02384	0.969874		4.02384	0.971964		4.02384	0.970494		4.02384	0.971794		4.02384	0.969626		4.02384	0.957118
4.09836	0.959525		4.09836	0.958239		4.09836	0.95989		4.09836	0.958648		4.09836	0.960377		4.09836	0.959266		4.09836	0.963084		4.09836	0.965391		4.09836	0.967486		4.09836	0.967897		4.09836	0.970979		4.09836	0.969864		4.09836	0.96951		4.09836	0.97086		4.09836	0.973449		4.09836	0.969497		4.09836	0.955907
4.17287	0.960005		4.17287	0.958178		4.17287	0.957957		4.17287	0.958526		4.17287	0.9599		4.17287	0.959114		4.17287	0.962618		4.17287	0.96494		4.17287	0.96728		4.17287	0.967224		4.17287	0.970821		4.17287	0.969731		4.17287	0.969879		4.17287	0.96973		4.17287	0.971955		4.17287	0.968346		4.17287	0.956201
4.24739	0.957311		4.24739	0.956702		4.24739	0.958144		4.24739	0.958272		4.24739	0.957744		4.24739	0.959499		4.24739	0.964072		4.24739	0.96382		4.24739	0.96733		4.24739	0.966851		4.24739	0.970725		4.24739	0.968711		4.24739	0.968535		4.24739	0.969387		4.24739	0.970838		4.24739	0.968877		4.24739	0.956104
4.3219	0.958031		4.3219	0.957197		4.3219	0.958581		4.3219	0.957751		4.3219	0.957635		4.3219	0.959785		4.3219	0.963636		4.3219	0.964081		4.3219	0.967893		4.3219	0.966583		4.3219	0.969909		4.3219	0.968807		4.3219	0.967722		4.3219	0.971137		4.3219	0.969482		4.3219	0.967378		4.3219	0.955598
4.39642	0.956898		4.39642	0.956853		4.39642	0.956691		4.39642	0.956432		4.39642	0.95598		4.39642	0.960086		4.39642	0.962054		4.39642	0.964184		4.39642	0.967737		4.39642	0.967702		4.39642	0.97021		4.39642	0.969603		4.39642	0.968733		4.39642	0.970447		4.39642	0.970628		4.39642	0.968106		4.39642	0.955656
4.47094	0.957015		4.47094	0.956223		4.47094	0.955065		4.47094	0.958225		4.47094	0.95723		4.47094	0.960666		4.47094	0.962481		4.47094	0.964733		4.47094	0.964945		4.47094	0.966555		4.47094	0.968218		4.47094	0.969239		4.47094	0.969894		4.47094	0.969741		4.47094	0.969793		4.47094	0.966916		4.47094	0.955965
4.54545	0.955988		4.54545	0.956398		4.54545	0.955795		4.54545	0.956856		4.54545	0.95618		4.54545	0.96016		4.54545	0.963362		4.54545	0.962887		4.54545	0.964567		4.54545	0.964954		4.54545	0.969518		4.54545	0.969205		4.54545	0.969606		4.54545	0.969255		4.54545	0.969491		4.54545	0.967357		4.54545	0.955598
4.61997	0.956201		4.61997	0.955401		4.61997	0.956346		4.61997	0.957754		4.61997	0.956317		4.61997	0.958683		4.61997	0.962839		4.61997	0.964714		4.61997	0.964867		4.61997	0.965944		4.61997	0.969564		4.61997	0.968027		4.61997	0.969928		4.61997	0.968983		4.61997	0.96918		4.61997	0.968289		4.61997	0.955614
4.69448	0.95628		4.69448	0.955024		4.69448	0.954844		4.69448	0.957465		4.69448	0.957931		4.69448	0.958323		4.69448	0.963774		4.69448	0.963346		4.69448	0.965518		4.69448	0.966549		4.69448	0.968125		4.69448	0.968173		4.69448	0.969328		4.69448	0.967086		4.69448	0.966825		4.69448	0.967483		4.69448	0.954639
4.769	0.955417		4.769	0.954557		4.769	0.95501		4.769	0.956185		4.769	0.955575		4.769	0.957693		4.769	0.96252		4.769	0.964472		4.769	0.963509		4.769	0.96464		4.769	0.969037		4.769	0.966702		4.769	0.968814		4.769	0.968623		4.769	0.96734		4.769	0.968223		4.769	0.955054
4.84351	0.955141		4.84351	0.955314		4.84351	0.956202		4.84351	0.956944		4.84351	0.955993		4.84351	0.957382		4.84351	0.96157		4.84351	0.962791		4.84351	0.962313		4.84351	0.963927		4.84351	0.969071		4.84351	0.968397		4.84351	0.96729		4.84351	0.967278		4.84351	0.968005		4.84351	0.968967		4.84351	0.953286
4.91803	0.956108		4.91803	0.95372		4.91803	0.953481		4.91803	0.955974		4.91803	0.956127		4.91803	0.957724		4.91803	0.962403		4.91803	0.962516		4.91803	0.962742		4.91803	0.964698		4.91803	0.967356		4.91803	0.969476		4.91803	0.967125		4.91803	0.966493		4.91803	0.968439		4.91803	0.968397		4.91803	0.954433
4.99255	0.955045		4.99255	0.953739		4.99255	0.955242		4.99255	0.957462		4.99255	0.955715		4.99255	0.957128		4.99255	0.963257		4.99255	0.962084		4.99255	0.963193		4.99255	0.964609		4.99255	0.967161		4.99255	0.968176		4.99255	0.967512		4.99255	0.966735		4.99255	0.967569		4.99255	0.968514		4.99255	0.955368
5.06706	0.953721		5.06706	0.953414		5.06706	0.953863		5.06706	0.956549		5.06706	0.956335		5.06706	0.957174		5.06706	0.962236		5.06706	0.96202		5.06706	0.962911		5.06706	0.964365		5.06706	0.96623		5.06706	0.968782		5.06706	0.966552		5.06706	0.967723		5.06706	0.967654		5.06706	0.969827		5.06706	0.953864
5.14158	0.954166		5.14158	0.952803		5.14158	0.95404		5.14158	0.955949		5.14158	0.955444		5.14158	0.956768		5.14158	0.961418		5.14158	0.961619		5.14158	0.964022		5.14158	0.964813		5.14158	0.968274		5.14158	0.968478		5.14158	0.967909		5.14158	0.967582		5.14158	0.968111		5.14158	0.969551		5.14158	0.952529
5.21609	0.953244		5.21609	0.951856		5.21609	0.95353		5.21609	0.954942		5.21609	0.95627		5.21609	0.956281		5.21609	0.960902		5.21609	0.960626		5.21609	0.962848		5.21609	0.963866		5.21609	0.96752		5.21609	0.969759		5.21609	0.968655		5.21609	0.966761		5.21609	0.967818		5.21609	0.969428		5.21609	0.952983
5.29061	0.952032		5.29061	0.952122		5.29061	0.953392		5.29061	0.954226		5.29061	0.955768		5.29061	0.956039		5.29061	0.960579		5.29061	0.961122		5.29061	0.963618		5.29061	0.96418		5.29061	0.967005		5.29061	0.968589		5.29061	0.969123		5.29061	0.966891		5.29061	0.966828		5.29061	0.969168		5.29061	0.952278
5.36512	0.952319		5.36512	0.95293		5.36512	0.953306		5.36512	0.953561		5.36512	0.954961		5.36512	0.955334		5.36512	0.960961		5.36512	0.961894		5.36512	0.964776		5.36512	0.964507		5.36512	0.967334		5.36512	0.968677		5.36512	0.968467		5.36512	0.967641		5.36512	0.966989		5.36512	0.968757		5.36512	0.951796
5.43964	0.952617		5.43964	0.951478		5.43964	0.953089		5.43964	0.952594		5.43964	0.955569		5.43964	0.955315		5.43964	0.959385		5.43964	0.961416		5.43964	0.965314		5.43964	0.964014		5.43964	0.966823		5.43964	0.967896		5.43964	0.968778		5.43964	0.969107		5.43964	0.967156		5.43964	0.967339		5.43964	0.951488
5.51415	0.953449		5.51415	0.951702		5.51415	0.95352		5.51415	0.952453		5.51415	0.955382		5.51415	0.955651		5.51415	0.960976		5.51415	0.9596		5.51415	0.963599		5.51415	0.964967		5.51415	0.966227		5.51415	0.967828		5.51415	0.968265		5.51415	0.967307		5.51415	0.968114		5.51415	0.96765		5.51415	0.952399
5.58867	0.953379		5.58867	0.951589		5.58867	0.952401		5.58867	0.952183		5.58867	0.955279		5.58867	0.955052		5.58867	0.960854		5.58867	0.960829		5.58867	0.963718		5.58867	0.965241		5.58867	0.967309		5.58867	0.967623		5.58867	0.96879		5.58867	0.968065		5.58867	0.966186		5.58867	0.966763		5.58867	0.95166
5.66319	0.954743		5.66319	0.952058		5.66319	0.952527		5.66319	0.951919		5.66319	0.955295		5.66319	0.953208		5.66319	0.960266		5.66319	0.960942		5.66319	0.962842		5.66319	0.964119		5.66319	0.96726		5.66319	0.967899		5.66319	0.968359		5.66319	0.967266		5.66319	0.966643		5.66319	0.965966		5.66319	0.950483
5.7377	0.95202		5.7377	0.95311		5.7377	0.952673		5.7377	0.952054		5.7377	0.954313		5.7377	0.953342		5.7377	0.959701		5.7377	0.963955		5.7377	0.963662		5.7377	0.965445		5.7377	0.966823		5.7377	0.967535		5.7377	0.969522		5.7377	0.965655		5.7377	0.966652		5.7377	0.965759		5.7377	0.950413
5.81222	0.952275		5.81222	0.953032		5.81222	0.951481		5.81222	0.952641		5.81222	0.954051		5.81222	0.953447		5.81222	0.958985		5.81222	0.963281		5.81222	0.963937		5.81222	0.96488		5.81222	0.966218		5.81222	0.967644		5.81222	0.968484		5.81222	0.965867		5.81222	0.966511		5.81222	0.965441		5.81222	0.950552
5.88673	0.952802		5.88673	0.95161		5.88673	0.951221		5.88673	0.953162		5.88673	0.954154		5.88673	0.953304		5.88673	0.958815		5.88673	0.962165		5.88673	0.961778		5.88673	0.964831		5.88673	0.964853		5.88673	0.967156		5.88673	0.96768		5.88673	0.965838		5.88673	0.968328		5.88673	0.966619		5.88673	0.951327
5.96125	0.951777		5.96125	0.95178		5.96125	0.951539		5.96125	0.953526		5.96125	0.953537		5.96125	0.953838		5.96125	0.958009		5.96125	0.962852		5.96125	0.960927		5.96125	0.963924		5.96125	0.964989		5.96125	0.966618		5.96125	0.966847		5.96125	0.965245		5.96125	0.96906		5.96125	0.966769		5.96125	0.950876
6.03576	0.952237		6.03576	0.951566		6.03576	0.951114		6.03576	0.952054		6.03576	0.952587		6.03576	0.952659		6.03576	0.959009		6.03576	0.962955		6.03576	0.96139		6.03576	0.961297		6.03576	0.965234		6.03576	0.966111		6.03576	0.964507		6.03576	0.966384		6.03576	0.968331		6.03576	0.966047		6.03576	0.950619
6.11028	0.952123		6.11028	0.951603		6.11028	0.951178		6.11028	0.952293		6.11028	0.951465		6.11028	0.953221		6.11028	0.960851		6.11028	0.96201		6.11028	0.962172		6.11028	0.962441		6.11028	0.964316		6.11028	0.965965		6.11028	0.964296		6.11028	0.965935		6.11028	0.968002		6.11028	0.967432		6.11028	0.949587
6.18479	0.951066		6.18479	0.950097		6.18479	0.951151		6.18479	0.951724		6.18479	0.952755		6.18479	0.953519		6.18479	0.960251		6.18479	0.963104		6.18479	0.961775		6.18479	0.96332		6.18479	0.963947		6.18479	0.966637		6.18479	0.964011		6.18479	0.966735		6.18479	0.967909		6.18479	0.967812		6.18479	0.949617
6.25931	0.949558		6.25931	0.949996		6.25931	0.951689		6.25931	0.951652		6.25931	0.95273		6.25931	0.953764		6.25931	0.960024		6.25931	0.962358		6.25931	0.961909		6.25931	0.962777		6.25931	0.964996		6.25931	0.966251		6.25931	0.965202		6.25931	0.966924		6.25931	0.967666		6.25931	0.967492		6.25931	0.950389
6.33383	0.948861		6.33383	0.950644		6.33383	0.94975		6.33383	0.951213		6.33383	0.952509		6.33383	0.95381		6.33383	0.95943		6.33383	0.961913		6.33383	0.962463		6.33383	0.962404		6.33383	0.965331		6.33383	0.96585		6.33383	0.965055		6.33383	0.967995		6.33383	0.966505		6.33383	0.967408		6.33383	0.949323
6.40834	0.948899		6.40834	0.950526		6.40834	0.94957		6.40834	0.949735		6.40834	0.953331		6.40834	0.952656		6.40834	0.958767		6.40834	0.961045		6.40834	0.962545		6.40834	0.961873		6.40834	0.965346		6.40834	0.963969		6.40834	0.965382		6.40834	0.968062		6.40834	0.965943		6.40834	0.967734		6.40834	0.949296
6.48286	0.949809		6.48286	0.9508		6.48286	0.95034		6.48286	0.950551		6.48286	0.952883		6.48286	0.953429		6.48286	0.958827		6.48286	0.959574		6.48286	0.962554		6.48286	0.961263		6.48286	0.966215		6.48286	0.964809		6.48286	0.964098		6.48286	0.967747		6.48286	0.966224		6.48286	0.965135		6.48286	0.950997
6.55737	0.949066		6.55737	0.950401		6.55737	0.948661		6.55737	0.95094		6.55737	0.951574		6.55737	0.953112		6.55737	0.959244		6.55737	0.959351		6.55737	0.961941		6.55737	0.963277		6.55737	0.966494		6.55737	0.965244		6.55737	0.963909		6.55737	0.965752		6.55737	0.96611		6.55737	0.9647		6.55737	0.950359
6.63189	0.949938		6.63189	0.950309		6.63189	0.949074		6.63189	0.95013		6.63189	0.950091		6.63189	0.953022		6.63189	0.95888		6.63189	0.958987		6.63189	0.961603		6.63189	0.961016		6.63189	0.966183		6.63189	0.964177		6.63189	0.963426		6.63189	0.965894		6.63189	0.964815		6.63189	0.965084		6.63189	0.951103
6.7064	0.951461		6.7064	0.949852		6.7064	0.950166		6.7064	0.951354		6.7064	0.950237		6.7064	0.952386		6.7064	0.958501		6.7064	0.9603		6.7064	0.961334		6.7064	0.960251		6.7064	0.965002		6.7064	0.964252		6.7064	0.962226		6.7064	0.965218		6.7064	0.964888		6.7064	0.964568		6.7064	0.950949
6.78092	0.951139		6.78092	0.949538		6.78092	0.949169		6.78092	0.949669		6.78092	0.950888		6.78092	0.951591		6.78092	0.959606		6.78092	0.960529		6.78092	0.959487		6.78092	0.961741		6.78092	0.964567		6.78092	0.963083		6.78092	0.962385		6.78092	0.963586		6.78092	0.963907		6.78092	0.963756		6.78092	0.949859
6.85544	0.952494		6.85544	0.948838		6.85544	0.949921		6.85544	0.950535		6.85544	0.951589		6.85544	0.952035		6.85544	0.957779		6.85544	0.960113		6.85544	0.959515		6.85544	0.961358		6.85544	0.964555		6.85544	0.963413		6.85544	0.96192		6.85544	0.963837		6.85544	0.963655		6.85544	0.965756		6.85544	0.948897
6.92995	0.950796		6.92995	0.948867		6.92995	0.948564		6.92995	0.949813		6.92995	0.951527		6.92995	0.950902		6.92995	0.957238		6.92995	0.960174		6.92995	0.959315		6.92995	0.960695		6.92995	0.962173		6.92995	0.964103		6.92995	0.962514		6.92995	0.963763		6.92995	0.963259		6.92995	0.964347		6.92995	0.948131
7.00447	0.949678		7.00447	0.949133		7.00447	0.949248		7.00447	0.950055		7.00447	0.952986		7.00447	0.952119		7.00447	0.957313		7.00447	0.961058		7.00447	0.959506		7.00447	0.960211		7.00447	0.962145		7.00447	0.963602		7.00447	0.962835		7.00447	0.962952		7.00447	0.96446		7.00447	0.96536		7.00447	0.94952
7.07898	0.948802		7.07898	0.949326		7.07898	0.948921		7.07898	0.949684		7.07898	0.9512		7.07898	0.95138		7.07898	0.957355		7.07898	0.961252		7.07898	0.95796		7.07898	0.959943		7.07898	0.962244		7.07898	0.962937		7.07898	0.963394		7.07898	0.9632		7.07898	0.965606		7.07898	0.966178		7.07898	0.948567
7.1535	0.949789		7.1535	0.948786		7.1535	0.948481		7.1535	0.949866		7.1535	0.950876		7.1535	0.951995		7.1535	0.956423		7.1535	0.960148		7.1535	0.960207		7.1535	0.960967		7.1535	0.962849		7.1535	0.964759		7.1535	0.963675		7.1535	0.963902		7.1535	0.965433		7.1535	0.965813		7.1535	0.947919
7.22801	0.950237		7.22801	0.947674		7.22801	0.947441		7.22801	0.951078		7.22801	0.950944		7.22801	0.95219		7.22801	0.956832		7.22801	0.958148		7.22801	0.960235		7.22801	0.959372		7.22801	0.962697		7.22801	0.964268		7.22801	0.963939		7.22801	0.964371		7.22801	0.966233		7.22801	0.965102		7.22801	0.947807
7.30253	0.950228		7.30253	0.947275		7.30253	0.947108		7.30253	0.949782		7.30253	0.950714		7.30253	0.9508		7.30253	0.954468		7.30253	0.95868		7.30253	0.960786		7.30253	0.960276		7.30253	0.963274		7.30253	0.963568		7.30253	0.964929		7.30253	0.964882		7.30253	0.965252		7.30253	0.963807		7.30253	0.948524
7.37704	0.950773		7.37704	0.947808		7.37704	0.947206		7.37704	0.949273		7.37704	0.950586		7.37704	0.949683		7.37704	0.955883		7.37704	0.958996		7.37704	0.960905		7.37704	0.960794		7.37704	0.964226		7.37704	0.964703		7.37704	0.963153		7.37704	0.964902		7.37704	0.965199		7.37704	0.964173		7.37704	0.946902
7.45156	0.95082		7.45156	0.948357		7.45156	0.948906		7.45156	0.948316		7.45156	0.949019		7.45156	0.949143		7.45156	0.955351		7.45156	0.95969		7.45156	0.961064		7.45156	0.961839		7.45156	0.964862		7.45156	0.965219		7.45156	0.962772		7.45156	0.963952		7.45156	0.965064		7.45156	0.965336		7.45156	0.946018
7.52608	0.949915		7.52608	0.950981		7.52608	0.949184		7.52608	0.949364		7.52608	0.949542		7.52608	0.951231		7.52608	0.955077		7.52608	0.959938		7.52608	0.960845		7.52608	0.961593		7.52608	0.964071		7.52608	0.964277		7.52608	0.962527		7.52608	0.965413		7.52608	0.965339		7.52608	0.965786		7.52608	0.947595
7.60059	0.948504		7.60059	0.948775		7.60059	0.9486		7.60059	0.949574		7.60059	0.949692		7.60059	0.950381		7.60059	0.956056		7.60059	0.959522		7.60059	0.960132		7.60059	0.963098		7.60059	0.963702		7.60059	0.963335		7.60059	0.962721		7.60059	0.965625		7.60059	0.964033		7.60059	0.964736		7.60059	0.946454
7.67511	0.947485		7.67511	0.948895		7.67511	0.946915		7.67511	0.94895		7.67511	0.948719		7.67511	0.951051		7.67511	0.954984		7.67511	0.958686		7.67511	0.96097		7.67511	0.962703		7.67511	0.963066		7.67511	0.963397		7.67511	0.961482		7.67511	0.966634		7.67511	0.965624		7.67511	0.964059		7.67511	0.947074
7.74962	0.947728		7.74962	0.949437		7.74962	0.94734		7.74962	0.948859		7.74962	0.948467		7.74962	0.950005		7.74962	0.956151		7.74962	0.961019		7.74962	0.961828		7.74962	0.963557		7.74962	0.963941		7.74962	0.963239		7.74962	0.96192		7.74962	0.965988		7.74962	0.964103		7.74962	0.963768		7.74962	0.94534
7.82414	0.946914		7.82414	0.950217		7.82414	0.946983		7.82414	0.949568		7.82414	0.947373		7.82414	0.949167		7.82414	0.955038		7.82414	0.959683		7.82414	0.961787		7.82414	0.962515		7.82414	0.963767		7.82414	0.963727		7.82414	0.960237		7.82414	0.96644		7.82414	0.964419		7.82414	0.964278		7.82414	0.946006
7.89865	0.947695		7.89865	0.950187		7.89865	0.947542		7.89865	0.949003		7.89865	0.946893		7.89865	0.94989		7.89865	0.956567		7.89865	0.958728		7.89865	0.962883		7.89865	0.963496		7.89865	0.962148		7.89865	0.963466		7.89865	0.960699		7.89865	0.966761		7.89865	0.9648		7.89865	0.962959		7.89865	0.944768
7.97317	0.946536		7.97317	0.949423		7.97317	0.946597		7.97317	0.948325		7.97317	0.948788		7.97317	0.951377		7.97317	0.957247		7.97317	0.958035		7.97317	0.962122		7.97317	0.96262		7.97317	0.963606		7.97317	0.964218		7.97317	0.961359		7.97317	0.96515		7.97317	0.964417		7.97317	0.963207		7.97317	0.944853
8.04768	0.946161		8.04768	0.949359		8.04768	0.946028		8.04768	0.949863		8.04768	0.949801		8.04768	0.951324		8.04768	0.957179		8.04768	0.958709		8.04768	0.962276		8.04768	0.962299		8.04768	0.963727		8.04768	0.963186		8.04768	0.961464		8.04768	0.966021		8.04768	0.965222		8.04768	0.963171		8.04768	0.945673
8.1222	0.946381		8.1222	0.948016		8.1222	0.947035		8.1222	0.949301		8.1222	0.948994		8.1222	0.951532		8.1222	0.958286		8.1222	0.959222		8.1222	0.962736		8.1222	0.961019		8.1222	0.962269		8.1222	0.963664		8.1222	0.961717		8.1222	0.964262		8.1222	0.964273		8.1222	0.962782		8.1222	0.945382
8.19672	0.947821		8.19672	0.947396		8.19672	0.946154		8.19672	0.948997		8.19672	0.947439		8.19672	0.951784		8.19672	0.956447		8.19672	0.957944		8.19672	0.962057		8.19672	0.960698		8.19672	0.961518		8.19672	0.964383		8.19672	0.961351		8.19672	0.964492		8.19672	0.965076		8.19672	0.962551		8.19672	0.945488
8.27123	0.94653		8.27123	0.94782		8.27123	0.94734		8.27123	0.948394		8.27123	0.947189		8.27123	0.952113		8.27123	0.95679		8.27123	0.959477		8.27123	0.960482		8.27123	0.960843		8.27123	0.96221		8.27123	0.964373		8.27123	0.960438		8.27123	0.962677		8.27123	0.963113		8.27123	0.961807		8.27123	0.944962
8.34575	0.946293		8.34575	0.948973		8.34575	0.947444		8.34575	0.949116		8.34575	0.947541		8.34575	0.951262		8.34575	0.956343		8.34575	0.95969		8.34575	0.962382		8.34575	0.959844		8.34575	0.962632		8.34575	0.963571		8.34575	0.961365		8.34575	0.962919		8.34575	0.962281		8.34575	0.962062		8.34575	0.944907
8.42026	0.946635		8.42026	0.948925		8.42026	0.946655		8.42026	0.948614		8.42026	0.946834		8.42026	0.951017		8.42026	0.955124		8.42026	0.959254		8.42026	0.962498		8.42026	0.95965		8.42026	0.963286		8.42026	0.962698		8.42026	0.962145		8.42026	0.963666		8.42026	0.963031		8.42026	0.961684		8.42026	0.943106
8.49478	0.945792		8.49478	0.947957		8.49478	0.947334		8.49478	0.947964		8.49478	0.948991		8.49478	0.949822		8.49478	0.955611		8.49478	0.960735		8.49478	0.960839		8.49478	0.960674		8.49478	0.962427		8.49478	0.963298		8.49478	0.963582		8.49478	0.962639		8.49478	0.963338		8.49478	0.961313		8.49478	0.943954
8.56929	0.946264		8.56929	0.948989		8.56929	0.94612		8.56929	0.947324		8.56929	0.948243		8.56929	0.949602		8.56929	0.956838		8.56929	0.959106		8.56929	0.961362		8.56929	0.960997		8.56929	0.962179		8.56929	0.962915		8.56929	0.96369		8.56929	0.963991		8.56929	0.962322		8.56929	0.961627		8.56929	0.944529
8.64381	0.946685		8.64381	0.948291		8.64381	0.946426		8.64381	0.945394		8.64381	0.947164		8.64381	0.950579		8.64381	0.956549		8.64381	0.958022		8.64381	0.962263		8.64381	0.961235		8.64381	0.962927		8.64381	0.962561		8.64381	0.963411		8.64381	0.962515		8.64381	0.962852		8.64381	0.961004		8.64381	0.944108
8.71833	0.947376		8.71833	0.947101		8.71833	0.945894		8.71833	0.945952		8.71833	0.946862		8.71833	0.948779		8.71833	0.956552		8.71833	0.957509		8.71833	0.961409		8.71833	0.961417		8.71833	0.96377		8.71833	0.963742		8.71833	0.964344		8.71833	0.963681		8.71833	0.961885		8.71833	0.961765		8.71833	0.944274
8.79284	0.947786		8.79284	0.945819		8.79284	0.945882		8.79284	0.946247		8.79284	0.947277		8.79284	0.948087		8.79284	0.957223		8.79284	0.95768		8.79284	0.961997		8.79284	0.960883		8.79284	0.964046		8.79284	0.963419		8.79284	0.963285		8.79284	0.963958		8.79284	0.962351		8.79284	0.961984		8.79284	0.943954
8.86736	0.947098		8.86736	0.946651		8.86736	0.945022		8.86736	0.945409		8.86736	0.947037		8.86736	0.948618		8.86736	0.957489		8.86736	0.959377		8.86736	0.960933		8.86736	0.961176		8.86736	0.962818		8.86736	0.962551		8.86736	0.965136		8.86736	0.963182		8.86736	0.962993		8.86736	0.962926		8.86736	0.944504
8.94187	0.945663		8.94187	0.945767		8.94187	0.945701		8.94187	0.946106		8.94187	0.945974		8.94187	0.949313		8.94187	0.955617		8.94187	0.958041		8.94187	0.95995		8.94187	0.960233		8.94187	0.960994		8.94187	0.963406		8.94187	0.963075		8.94187	0.961857		8.94187	0.963242		8.94187	0.961684		8.94187	0.944765
9.01639	0.94696		9.01639	0.946531		9.01639	0.944399		9.01639	0.947076		9.01639	0.946329		9.01639	0.949521		9.01639	0.955811		9.01639	0.95878		9.01639	0.958849		9.01639	0.959742		9.01639	0.960513		9.01639	0.962237		9.01639	0.961881		9.01639	0.963153		9.01639	0.963702		9.01639	0.962734		9.01639	0.94257
9.0909	0.947596		9.0909	0.946123		9.0909	0.943769		9.0909	0.94695		9.0909	0.945765		9.0909	0.94863		9.0909	0.954408		9.0909	0.957983		9.0909	0.959143		9.0909	0.960045		9.0909	0.961429		9.0909	0.963521		9.0909	0.961975		9.0909	0.96338		9.0909	0.964241		9.0909	0.962991		9.0909	0.943391
9.16542	0.947979		9.16542	0.945079		9.16542	0.943237		9.16542	0.945817		9.16542	0.946628		9.16542	0.947668		9.16542	0.955671		9.16542	0.960032		9.16542	0.960047		9.16542	0.960402		9.16542	0.962002		9.16542	0.964855		9.16542	0.961042		9.16542	0.963238		9.16542	0.964569		9.16542	0.962146		9.16542	0.944041
9.23993	0.946425		9.23993	0.945439		9.23993	0.943279		9.23993	0.94379		9.23993	0.946011		9.23993	0.948398		9.23993	0.955259		9.23993	0.958406		9.23993	0.95862		9.23993	0.959782		9.23993	0.963035		9.23993	0.963636		9.23993	0.961764		9.23993	0.963338		9.23993	0.964841		9.23993	0.962707		9.23993	0.943648
9.31445	0.945798		9.31445	0.945687		9.31445	0.943148		9.31445	0.945039		9.31445	0.944777		9.31445	0.947048		9.31445	0.955047		9.31445	0.958373		9.31445	0.958977		9.31445	0.9608		9.31445	0.964028		9.31445	0.962464		9.31445	0.962346		9.31445	0.963746		9.31445	0.963995		9.31445	0.9614		9.31445	0.944405
9.38897	0.945218		9.38897	0.945213		9.38897	0.94383		9.38897	0.945017		9.38897	0.945148		9.38897	0.947743		9.38897	0.954936		9.38897	0.958403		9.38897	0.957972		9.38897	0.960695		9.38897	0.962551		9.38897	0.96257		9.38897	0.961188		9.38897	0.963985		9.38897	0.96238		9.38897	0.96265		9.38897	0.944063
9.46348	0.945031		9.46348	0.944883		9.46348	0.943001		9.46348	0.946329		9.46348	0.944986		9.46348	0.947982		9.46348	0.955142		9.46348	0.957935		9.46348	0.958955		9.46348	0.960902		9.46348	0.962486		9.46348	0.961009		9.46348	0.960561		9.46348	0.962356		9.46348	0.962708		9.46348	0.961906		9.46348	0.945143
9.538	0.943438		9.538	0.944753		9.538	0.942879		9.538	0.945692		9.538	0.945207		9.538	0.948152		9.538	0.95516		9.538	0.95847		9.538	0.960232		9.538	0.960908		9.538	0.961903		9.538	0.961606		9.538	0.960051		9.538	0.96194		9.538	0.96311		9.538	0.962704		9.538	0.943975
9.61251	0.944448		9.61251	0.944645		9.61251	0.944016		9.61251	0.946304		9.61251	0.946448		9.61251	0.947588		9.61251	0.954817		9.61251	0.958306		9.61251	0.960686		9.61251	0.960011		9.61251	0.96185		9.61251	0.961703		9.61251	0.960555		9.61251	0.961654		9.61251	0.961466		9.61251	0.962203		9.61251	0.943602
9.68703	0.944114		9.68703	0.945451		9.68703	0.942857		9.68703	0.947054		9.68703	0.947214		9.68703	0.947957		9.68703	0.954238		9.68703	0.959835		9.68703	0.960877		9.68703	0.960004		9.68703	0.961829		9.68703	0.960549		9.68703	0.961305		9.68703	0.960515		9.68703	0.961888		9.68703	0.962083		9.68703	0.944384
9.76154	0.944524		9.76154	0.945397		9.76154	0.945368		9.76154	0.946712		9.76154	0.945335		9.76154	0.946414		9.76154	0.955348		9.76154	0.958086		9.76154	0.961991		9.76154	0.95882		9.76154	0.961692		9.76154	0.961824		9.76154	0.962481		9.76154	0.962742		9.76154	0.963163		9.76154	0.962233		9.76154	0.942495
9.83606	0.944114		9.83606	0.944553		9.83606	0.944493		9.83606	0.945984		9.83606	0.944344		9.83606	0.947761		9.83606	0.954339		9.83606	0.957364		9.83606	0.960354		9.83606	0.959073		9.83606	0.961416		9.83606	0.962732		9.83606	0.961491		9.83606	0.963085		9.83606	0.961528		9.83606	0.961375		9.83606	0.943357
9.91057	0.944431		9.91057	0.944312		9.91057	0.944316		9.91057	0.945689		9.91057	0.945535		9.91057	0.94733		9.91057	0.955507		9.91057	0.958893		9.91057	0.959562		9.91057	0.960236		9.91057	0.960817		9.91057	0.961071		9.91057	0.960733		9.91057	0.963285		9.91057	0.962744		9.91057	0.961133		9.91057	0.943133
9.98509	0.944551		9.98509	0.944254		9.98509	0.945686		9.98509	0.946241		9.98509	0.945447		9.98509	0.946703		9.98509	0.954312		9.98509	0.957983		9.98509	0.96005		9.98509	0.959391		9.98509	0.961335		9.98509	0.961671		9.98509	0.960648		9.98509	0.962326		9.98509	0.962515		9.98509	0.960974		9.98509	0.942065
10.0596	0.944899		10.0596	0.94484		10.0596	0.946249		10.0596	0.946524		10.0596	0.945575		10.0596	0.946532		10.0596	0.954596		10.0596	0.956244		10.0596	0.95954		10.0596	0.961062		10.0596	0.961143		10.0596	0.960216		10.0596	0.96141		10.0596	0.963327		10.0596	0.961329		10.0596	0.961169		10.0596	0.941363
10.1341	0.944589		10.1341	0.94493		10.1341	0.945288		10.1341	0.946844		10.1341	0.94412		10.1341	0.947426		10.1341	0.954889		10.1341	0.957393		10.1341	0.959171		10.1341	0.960729		10.1341	0.961891		10.1341	0.960139		10.1341	0.961585		10.1341	0.963572		10.1341	0.96137		10.1341	0.962557		10.1341	0.941593
10.2086	0.943157		10.2086	0.944336		10.2086	0.945582		10.2086	0.945777		10.2086	0.946192		10.2086	0.947305		10.2086	0.955145		10.2086	0.957576		10.2086	0.959475		10.2086	0.96134		10.2086	0.9611		10.2086	0.959846		10.2086	0.960891		10.2086	0.963563		10.2086	0.9626		10.2086	0.962272		10.2086	0.942546
10.2832	0.943245		10.2832	0.944204		10.2832	0.944362		10.2832	0.946109		10.2832	0.944207		10.2832	0.945766		10.2832	0.954835		10.2832	0.957609		10.2832	0.959165		10.2832	0.962712		10.2832	0.961571		10.2832	0.960593		10.2832	0.960346		10.2832	0.963315		10.2832	0.961197		10.2832	0.961316		10.2832	0.94208
10.3577	0.944278		10.3577	0.94286		10.3577	0.944643		10.3577	0.946866		10.3577	0.943304		10.3577	0.946377		10.3577	0.954841		10.3577	0.958519		10.3577	0.960438		10.3577	0.962725		10.3577	0.961453		10.3577	0.960384		10.3577	0.961245		10.3577	0.96443		10.3577	0.961402		10.3577	0.961696		10.3577	0.942343
10.4322	0.94436		10.4322	0.942306		10.4322	0.944423		10.4322	0.9455		10.4322	0.944014		10.4322	0.946433		10.4322	0.954085		10.4322	0.958706		10.4322	0.959124		10.4322	0.962265		10.4322	0.9606		10.4322	0.961146		10.4322	0.9618		10.4322	0.964041		10.4322	0.960538		10.4322	0.961534		10.4322	0.942473
10.5067	0.943277		10.5067	0.944459		10.5067	0.944441		10.5067	0.945475		10.5067	0.943687		10.5067	0.944996		10.5067	0.954918		10.5067	0.958699		10.5067	0.958507		10.5067	0.963005		10.5067	0.961993		10.5067	0.9615		10.5067	0.961017		10.5067	0.962976		10.5067	0.962249		10.5067	0.960944		10.5067	0.942322
10.5812	0.943851		10.5812	0.94439		10.5812	0.944518		10.5812	0.945711		10.5812	0.944213		10.5812	0.945431		10.5812	0.954865		10.5812	0.958499		10.5812	0.957875		10.5812	0.961112		10.5812	0.961593		10.5812	0.959747		10.5812	0.961527		10.5812	0.961851		10.5812	0.962729		10.5812	0.962946		10.5812	0.942098
10.6557	0.943549		10.6557	0.945024		10.6557	0.942246		10.6557	0.945472		10.6557	0.943911		10.6557	0.946284		10.6557	0.954847		10.6557	0.957838		10.6557	0.958939		10.6557	0.960489		10.6557	0.961363		10.6557	0.960443		10.6557	0.960528		10.6557	0.961376		10.6557	0.962035		10.6557	0.962398		10.6557	0.941835
10.7302	0.944782		10.7302	0.944499		10.7302	0.941616		10.7302	0.944188		10.7302	0.942895		10.7302	0.945952		10.7302	0.95531		10.7302	0.958125		10.7302	0.959055		10.7302	0.959505		10.7302	0.95909		10.7302	0.960589		10.7302	0.960636		10.7302	0.961462		10.7302	0.962178		10.7302	0.962967		10.7302	0.942564
10.8048	0.945795		10.8048	0.944732		10.8048	0.943463		10.8048	0.944075		10.8048	0.943843		10.8048	0.946293		10.8048	0.955602		10.8048	0.956383		10.8048	0.959443		10.8048	0.959468		10.8048	0.960151		10.8048	0.95988		10.8048	0.961338		10.8048	0.961179		10.8048	0.961463		10.8048	0.962176		10.8048	0.942358
10.8793	0.945069		10.8793	0.943023		10.8793	0.944396		10.8793	0.945325		10.8793	0.944444		10.8793	0.945316		10.8793	0.955874		10.8793	0.957789		10.8793	0.958986		10.8793	0.958496		10.8793	0.961481		10.8793	0.959451		10.8793	0.961458		10.8793	0.960807		10.8793	0.961329		10.8793	0.961807		10.8793	0.941626
10.9538	0.943989		10.9538	0.943247		10.9538	0.942212		10.9538	0.944866		10.9538	0.943827		10.9538	0.94476		10.9538	0.95616		10.9538	0.956996		10.9538	0.959625		10.9538	0.958718		10.9538	0.960169		10.9538	0.960157		10.9538	0.960747		10.9538	0.960881		10.9538	0.96161		10.9538	0.960863		10.9538	0.941608
11.0283	0.944762		11.0283	0.942189		11.0283	0.940995		11.0283	0.943347		11.0283	0.943886		11.0283	0.945937		11.0283	0.954121		11.0283	0.957441		11.0283	0.959509		11.0283	0.959927		11.0283	0.960299		11.0283	0.960708		11.0283	0.961756		11.0283	0.962359		11.0283	0.96062		11.0283	0.962032		11.0283	0.940143
11.1028	0.944182		11.1028	0.943502		11.1028	0.941787		11.1028	0.945086		11.1028	0.944095		11.1028	0.945002		11.1028	0.953091		11.1028	0.959774		11.1028	0.958551		11.1028	0.958919		11.1028	0.960541		11.1028	0.960742		11.1028	0.961698		11.1028	0.962061		11.1028	0.961329		11.1028	0.962608		11.1028	0.940367
11.1773	0.945555		11.1773	0.942813		11.1773	0.94164		11.1773	0.944323		11.1773	0.943543		11.1773	0.945794		11.1773	0.952381		11.1773	0.958083		11.1773	0.958517		11.1773	0.958179		11.1773	0.96203		11.1773	0.961407		11.1773	0.961096		11.1773	0.96122		11.1773	0.960476		11.1773	0.960719		11.1773	0.941417
11.2519	0.945432		11.2519	0.940861		11.2519	0.941735		11.2519	0.944832		11.2519	0.944079		11.2519	0.945201		11.2519	0.952667		11.2519	0.956905		11.2519	0.959449		11.2519	0.958919		11.2519	0.960424		11.2519	0.961678		11.2519	0.961662		11.2519	0.962087		11.2519	0.961449		11.2519	0.96089		11.2519	0.941614
11.3264	0.944808		11.3264	0.941022		11.3264	0.941958		11.3264	0.944709		11.3264	0.945391		11.3264	0.94494		11.3264	0.954115		11.3264	0.957796		11.3264	0.960485		11.3264	0.959773		11.3264	0.961146		11.3264	0.962527		11.3264	0.961929		11.3264	0.961527		11.3264	0.962169		11.3264	0.961735		11.3264	0.941959
11.4009	0.94316		11.4009	0.941694		11.4009	0.94157		11.4009	0.944854		11.4009	0.943733		11.4009	0.944037		11.4009	0.952927		11.4009	0.957076		11.4009	0.960388		11.4009	0.960396		11.4009	0.960293		11.4009	0.9623		11.4009	0.961218		11.4009	0.961506		11.4009	0.963154		11.4009	0.962194		11.4009	0.941184
11.4754	0.943965		11.4754	0.942556		11.4754	0.941136		11.4754	0.944775		11.4754	0.944519		11.4754	0.944652		11.4754	0.954091		11.4754	0.956638		11.4754	0.961334		11.4754	0.9587		11.4754	0.958947		11.4754	0.962125		11.4754	0.960526		11.4754	0.961512		11.4754	0.962451		11.4754	0.960887		11.4754	0.940663
11.5499	0.944237		11.5499	0.941298		11.5499	0.942729		11.5499	0.944888		11.5499	0.9445		11.5499	0.944366		11.5499	0.954405		11.5499	0.957357		11.5499	0.961014		11.5499	0.959739		11.5499	0.959899		11.5499	0.961009		11.5499	0.96066		11.5499	0.960807		11.5499	0.962442		11.5499	0.961987		11.5499	0.941708
11.6244	0.944138		11.6244	0.941694		11.6244	0.942117		11.6244	0.944173		11.6244	0.944647		11.6244	0.944999		11.6244	0.954494		11.6244	0.956363		11.6244	0.960197		11.6244	0.960418		11.6244	0.96083		11.6244	0.960499		11.6244	0.960696		11.6244	0.961205		11.6244	0.961519		11.6244	0.961238		11.6244	0.940866
11.6989	0.943476		11.6989	0.942311		11.6989	0.943622		11.6989	0.943476		11.6989	0.945264		11.6989	0.943587		11.6989	0.95393		11.6989	0.957496		11.6989	0.960366		11.6989	0.960831		11.6989	0.959859		11.6989	0.961653		11.6989	0.960594		11.6989	0.960798		11.6989	0.96127		11.6989	0.961286		11.6989	0.941535
11.7735	0.943095		11.7735	0.942759		11.7735	0.94287		11.7735	0.943862		11.7735	0.944441		11.7735	0.943047		11.7735	0.954477		11.7735	0.957144		11.7735	0.960329		11.7735	0.960902		11.7735	0.960774		11.7735	0.96142		11.7735	0.960897		11.7735	0.962049		11.7735	0.959905		11.7735	0.961495		11.7735	0.941608
11.848	0.942674		11.848	0.942955		11.848	0.942631		11.848	0.94245		11.848	0.94374		11.848	0.945074		11.848	0.953826		11.848	0.955557		11.848	0.960949		11.848	0.959674		11.848	0.960265		11.848	0.960795		11.848	0.959844		11.848	0.96186		11.848	0.959392		11.848	0.96041		11.848	0.940291
11.9225	0.941116		11.9225	0.943065		11.9225	0.941029		11.9225	0.942312		11.9225	0.943653		11.9225	0.945831		11.9225	0.954411		11.9225	0.956773		11.9225	0.959349		11.9225	0.960961		11.9225	0.959366		11.9225	0.95957		11.9225	0.959409		11.9225	0.960999		11.9225	0.960801		11.9225	0.960338		11.9225	0.940509
11.997	0.942434		11.997	0.942052		11.997	0.941769		11.997	0.942851		11.997	0.942677		11.997	0.944993		11.997	0.954993		11.997	0.958073		11.997	0.958648		11.997	0.959511		11.997	0.960892		11.997	0.960412		11.997	0.959451		11.997	0.961987		11.997	0.961179		11.997	0.961157		11.997	0.939943
12.0715	0.941148		12.0715	0.94191		12.0715	0.941659		12.0715	0.941445		12.0715	0.943543		12.0715	0.944785		12.0715	0.954799		12.0715	0.955782		12.0715	0.9597		12.0715	0.958869		12.0715	0.96047		12.0715	0.960226		12.0715	0.958779		12.0715	0.960904		12.0715	0.961103		12.0715	0.959061		12.0715	0.94004
12.146	0.941277		12.146	0.942568		12.146	0.941368		12.146	0.941634		12.146	0.942113		12.146	0.945542		12.146	0.954826		12.146	0.957315		12.146	0.959562		12.146	0.958808		12.146	0.959961		12.146	0.961165		12.146	0.959619		12.146	0.9604		12.146	0.960438		12.146	0.959667		12.146	0.939344
12.2206	0.941324		12.2206	0.942632		12.2206	0.940243		12.2206	0.942597		12.2206	0.942627		12.2206	0.94544		12.2206	0.955178		12.2206	0.957125		12.2206	0.959318		12.2206	0.959964		12.2206	0.959381		12.2206	0.960686		12.2206	0.959241		12.2206	0.959393		12.2206	0.960658		12.2206	0.95967		12.2206	0.93862
12.2951	0.941883		12.2951	0.942229		12.2951	0.94142		12.2951	0.941417		12.2951	0.943381		12.2951	0.945977		12.2951	0.955244		12.2951	0.959116		12.2951	0.959199		12.2951	0.96056		12.2951	0.960188		12.2951	0.960742		12.2951	0.959592		12.2951	0.958552		12.2951	0.960892		12.2951	0.960725		12.2951	0.939017
12.3696	0.942481		12.3696	0.942231		12.3696	0.941818		12.3696	0.942236		12.3696	0.942163		12.3696	0.944999		12.3696	0.95528		12.3696	0.958412		12.3696	0.960154		12.3696	0.960819		12.3696	0.960231		12.3696	0.960782		12.3696	0.960027		12.3696	0.959387		12.3696	0.96226		12.3696	0.960101		12.3696	0.938705
12.4441	0.941798		12.4441	0.940458		12.4441	0.940839		12.4441	0.9425		12.4441	0.942219		12.4441	0.944677		12.4441	0.955387		12.4441	0.959383		12.4441	0.960517		12.4441	0.960301		12.4441	0.961909		12.4441	0.960997		12.4441	0.959289		12.4441	0.960122		12.4441	0.95994		12.4441	0.961346		12.4441	0.939907
12.5186	0.941339		12.5186	0.940807		12.5186	0.94083		12.5186	0.941718		12.5186	0.942858		12.5186	0.944708		12.5186	0.954987		12.5186	0.957209		12.5186	0.959803		12.5186	0.959647		12.5186	0.961978		12.5186	0.962045		12.5186	0.961803		12.5186	0.959629		12.5186	0.959606		12.5186	0.962203		12.5186	0.939023
12.5931	0.940999		12.5931	0.941651		12.5931	0.940488		12.5931	0.941248		12.5931	0.941546		12.5931	0.943255		12.5931	0.954303		12.5931	0.957828		12.5931	0.958764		12.5931	0.959095		12.5931	0.960244		12.5931	0.962666		12.5931	0.960138		12.5931	0.959343		12.5931	0.961569		12.5931	0.961109		12.5931	0.940321
12.6677	0.940191		12.6677	0.942184		12.6677	0.941573		12.6677	0.943498		12.6677	0.943425		12.6677	0.943711		12.6677	0.954883		12.6677	0.956118		12.6677	0.958639		12.6677	0.958296		12.6677	0.9598		12.6677	0.960409		12.6677	0.960195		12.6677	0.959202		12.6677	0.96154		12.6677	0.960929		12.6677	0.940034
12.7422	0.940621		12.7422	0.942191		12.7422	0.941836		12.7422	0.941809		12.7422	0.942328		12.7422	0.943907		12.7422	0.95405		12.7422	0.956638		12.7422	0.959903		12.7422	0.958098		12.7422	0.960132		12.7422	0.961553		12.7422	0.961378		12.7422	0.959659		12.7422	0.96204		12.7422	0.961175		12.7422	0.940984
12.8167	0.940516		12.8167	0.942229		12.8167	0.94098		12.8167	0.943162		12.8167	0.942877		12.8167	0.943895		12.8167	0.953417		12.8167	0.956841		12.8167	0.960338		12.8167	0.959841		12.8167	0.96074		12.8167	0.961413		12.8167	0.961539		12.8167	0.960763		12.8167	0.961654		12.8167	0.960908		12.8167	0.939649
12.8912	0.940888		12.8912	0.941962		12.8912	0.940277		12.8912	0.94212		12.8912	0.943188		12.8912	0.945164		12.8912	0.95322		12.8912	0.956954		12.8912	0.960989		12.8912	0.958166		12.8912	0.959636		12.8912	0.962259		12.8912	0.962082		12.8912	0.95888		12.8912	0.959978		12.8912	0.958887		12.8912	0.940079
12.9657	0.940525		12.9657	0.942064		12.9657	0.94053		12.9657	0.939923		12.9657	0.94173		12.9657	0.945142		12.9657	0.953703		12.9657	0.957193		12.9657	0.96139		12.9657	0.960649		12.9657	0.96025		12.9657	0.961659		12.9657	0.961887		12.9657	0.960119		12.9657	0.959667		12.9657	0.959529		12.9657	0.939952
13.0402	0.940853		13.0402	0.941925		13.0402	0.940478		13.0402	0.941743		13.0402	0.940907		13.0402	0.944248		13.0402	0.953724		13.0402	0.956376		13.0402	0.961534		13.0402	0.958151		13.0402	0.959533		13.0402	0.960518		13.0402	0.961473		13.0402	0.96037		13.0402	0.960496		13.0402	0.960257		13.0402	0.94017
13.1147	0.940372		13.1147	0.940989		13.1147	0.940249		13.1147	0.942098		13.1147	0.940605		13.1147	0.943721		13.1147	0.953163		13.1147	0.958335		13.1147	0.962125		13.1147	0.959622		13.1147	0.960228		13.1147	0.961765		13.1147	0.961257		13.1147	0.960152		13.1147	0.962061		13.1147	0.960581		13.1147	0.939879
13.1893	0.941945		13.1893	0.939916		13.1893	0.940078		13.1893	0.941282		13.1893	0.941135		13.1893	0.942765		13.1893	0.952882		13.1893	0.958583		13.1893	0.962003		13.1893	0.958894		13.1893	0.960901		13.1893	0.959346		13.1893	0.96048		13.1893	0.9613		13.1893	0.962582		13.1893	0.960041		13.1893	0.939683
13.2638	0.942103		13.2638	0.940279		13.2638	0.940212		13.2638	0.940661		13.2638	0.941979		13.2638	0.943584		13.2638	0.9529		13.2638	0.957057		13.2638	0.960886		13.2638	0.959354		13.2638	0.960653		13.2638	0.961046		13.2638	0.960735		13.2638	0.959514		13.2638	0.962735		13.2638	0.959583		13.2638	0.938339
13.3383	0.942867		13.3383	0.942335		13.3383	0.94028		13.3383	0.940237		13.3383	0.941602		13.3383	0.943773		13.3383	0.952357		13.3383	0.958164		13.3383	0.961606		13.3383	0.960846		13.3383	0.961208		13.3383	0.959548		13.3383	0.962389		13.3383	0.960444		13.3383	0.961765		13.3383	0.959274		13.3383	0.937933
13.4128	0.942762		13.4128	0.941974		13.4128	0.9399		13.4128	0.940717		13.4128	0.942225		13.4128	0.943168		13.4128	0.954238		13.4128	0.957789		13.4128	0.961299		13.4128	0.96088		13.4128	0.959214		13.4128	0.959364		13.4128	0.960453		13.4128	0.960161		13.4128	0.960596		13.4128	0.960089		13.4128	0.938221
13.4873	0.941561		13.4873	0.941642		13.4873	0.939463		13.4873	0.939732		13.4873	0.942288		13.4873	0.943224		13.4873	0.952957		13.4873	0.955663		13.4873	0.960169		13.4873	0.960587		13.4873	0.95966		13.4873	0.961146		13.4873	0.959697		13.4873	0.961063		13.4873	0.960148		13.4873	0.961334		13.4873	0.938669
13.5618	0.940908		13.5618	0.941863		13.5618	0.939481		13.5618	0.939311		13.5618	0.941172		13.5618	0.94418		13.5618	0.953688		13.5618	0.956538		13.5618	0.959825		13.5618	0.96051		13.5618	0.960541		13.5618	0.960297		13.5618	0.960561		13.5618	0.960426		13.5618	0.96241		13.5618	0.960923		13.5618	0.938236
13.6364	0.940296		13.6364	0.941479		13.6364	0.939151		13.6364	0.939882		13.6364	0.941253		13.6364	0.944695		13.6364	0.95279		13.6364	0.95545		13.6364	0.958924		13.6364	0.960853		13.6364	0.96137		13.6364	0.961012		13.6364	0.959592		13.6364	0.960639		13.6364	0.961024		13.6364	0.959972		13.6364	0.937615
13.7109	0.940024		13.7109	0.941149		13.7109	0.940555		13.7109	0.939888		13.7109	0.941312		13.7109	0.943128		13.7109	0.952539		13.7109	0.957076		13.7109	0.959208		13.7109	0.959748		13.7109	0.959695		13.7109	0.960502		13.7109	0.958989		13.7109	0.95975		13.7109	0.959931		13.7109	0.958338		13.7109	0.937358
13.7854	0.942346		13.7854	0.941689		13.7854	0.940325		13.7854	0.940664		13.7854	0.940511		13.7854	0.944124		13.7854	0.953139		13.7854	0.957218		13.7854	0.960194		13.7854	0.960387		13.7854	0.960638		13.7854	0.960978		13.7854	0.958197		13.7854	0.961081		13.7854	0.960048		13.7854	0.958174		13.7854	0.936901
13.8599	0.941497		13.8599	0.941847		13.8599	0.939662		13.8599	0.940676		13.8599	0.940848		13.8599	0.942777		13.8599	0.951637		13.8599	0.957021		13.8599	0.959913		13.8599	0.959881		13.8599	0.9611		13.8599	0.96113		13.8599	0.958896		13.8599	0.959482		13.8599	0.960031		13.8599	0.958818		13.8599	0.937824
13.9344	0.942293		13.9344	0.942893		13.9344	0.939378		13.9344	0.940984		13.9344	0.940658		13.9344	0.94243		13.9344	0.95178		13.9344	0.957202		13.9344	0.960848		13.9344	0.959764		13.9344	0.960634		13.9344	0.960294		13.9344	0.958464		13.9344	0.958892		13.9344	0.959943		13.9344	0.959424		13.9344	0.93737
14.0089	0.942419		14.0089	0.94262		14.0089	0.939047		14.0089	0.940896		14.0089	0.941537		14.0089	0.9427		14.0089	0.952533		14.0089	0.95788		14.0089	0.9599		14.0089	0.960754		14.0089	0.96137		14.0089	0.960418		14.0089	0.958731		14.0089	0.958883		14.0089	0.96025		14.0089	0.960185		14.0089	0.937334
14.0834	0.940879		14.0834	0.942806		14.0834	0.938631		14.0834	0.941972		14.0834	0.941911		14.0834	0.943755		14.0834	0.952381		14.0834	0.958083		14.0834	0.95852		14.0834	0.961062		14.0834	0.960634		14.0834	0.959075		14.0834	0.959143		14.0834	0.958302		14.0834	0.959805		14.0834	0.959226		14.0834	0.938841
14.158	0.942208		14.158	0.942151		14.158	0.939219		14.158	0.943115		14.158	0.941103		14.158	0.943342		14.158	0.951598		14.158	0.956812		14.158	0.959813		14.158	0.960846		14.158	0.960327		14.158	0.958363		14.158	0.959233		14.158	0.958375		14.158	0.95987		14.158	0.958479		14.158	0.939437
14.2325	0.941939		14.2325	0.941319		14.2325	0.938267		14.2325	0.941128		14.2325	0.94159		14.2325	0.944912		14.2325	0.951793		14.2325	0.955931		14.2325	0.959722		14.2325	0.961966		14.2325	0.960476		14.2325	0.958366		14.2325	0.960237		14.2325	0.959343		14.2325	0.960857		14.2325	0.956552		14.2325	0.93895
14.307	0.942159		14.307	0.94076		14.307	0.938848		14.307	0.941834		14.307	0.941088		14.307	0.942315		14.307	0.951512		14.307	0.955879		14.307	0.960451		14.307	0.961426		14.307	0.962257		14.307	0.958562		14.307	0.960045		14.307	0.959163		14.307	0.960215		14.307	0.958051		14.307	0.939353
14.3815	0.942478		14.3815	0.941529		14.3815	0.938852		14.3815	0.941241		14.3815	0.941362		14.3815	0.941914		14.3815	0.953402		14.3815	0.956563		14.3815	0.959744		14.3815	0.960877		14.3815	0.961413		14.3815	0.959019		14.3815	0.960513		14.3815	0.958331		14.3815	0.960409		14.3815	0.95928		14.3815	0.939507
14.456	0.942188		14.456	0.9418		14.456	0.938824		14.456	0.940265		14.456	0.940377		14.456	0.942442		14.456	0.952315		14.456	0.956731		14.456	0.95949		14.456	0.960313		14.456	0.961019		14.456	0.95998		14.456	0.959574		14.456	0.958458		14.456	0.961856		14.456	0.958557		14.456	0.939368
14.5305	0.943081		14.5305	0.939973		14.5305	0.93987		14.5305	0.940199		14.5305	0.939539		14.5305	0.942038		14.5305	0.952109		14.5305	0.95587		14.5305	0.960892		14.5305	0.960899		14.5305	0.960014		14.5305	0.958935		14.5305	0.958863		14.5305	0.959429		14.5305	0.960951		14.5305	0.960716		14.5305	0.939534
14.6051	0.940452		14.6051	0.940798		14.6051	0.940888		14.6051	0.939728		14.6051	0.939686		14.6051	0.941433		14.6051	0.952837		14.6051	0.956686		14.6051	0.960657		14.6051	0.960057		14.6051	0.958547		14.6051	0.959063		14.6051	0.960531		14.6051	0.96122		14.6051	0.961041		14.6051	0.960149		14.6051	0.939701
14.6796	0.940531		14.6796	0.940371		14.6796	0.9419		14.6796	0.940262		14.6796	0.940203		14.6796	0.943001		14.6796	0.953888		14.6796	0.956312		14.6796	0.960551		14.6796	0.961781		14.6796	0.959819		14.6796	0.957872		14.6796	0.960585		14.6796	0.961468		14.6796	0.960139		14.6796	0.959535		14.6796	0.940261
14.7541	0.941851		14.7541	0.941074		14.7541	0.940588		14.7541	0.94083		14.7541	0.940804		14.7541	0.942358		14.7541	0.952864		14.7541	0.955486		14.7541	0.959428		14.7541	0.963002		14.7541	0.959937		14.7541	0.958086		14.7541	0.960696		14.7541	0.960898		14.7541	0.959656		14.7541	0.959403		14.7541	0.939098
14.8286	0.940938		14.8286	0.941326		14.8286	0.940072		14.8286	0.940252		14.8286	0.940543		14.8286	0.942138		14.8286	0.953659		14.8286	0.956012		14.8286	0.95908		14.8286	0.960923		14.8286	0.959003		14.8286	0.957564		14.8286	0.959553		14.8286	0.960739		14.8286	0.960725		14.8286	0.958183		14.8286	0.93964
14.9031	0.9415		14.9031	0.941486		14.9031	0.938943		14.9031	0.939502		14.9031	0.941297		14.9031	0.943047		14.9031	0.952745		14.9031	0.957796		14.9031	0.960047		14.9031	0.959974		14.9031	0.95944		14.9031	0.96021		14.9031	0.960069		14.9031	0.961158		14.9031	0.961006		14.9031	0.9594		14.9031	0.938505
14.9776	0.939989		14.9776	0.94039		14.9776	0.937907		14.9776	0.938281		14.9776	0.941284		14.9776	0.942389		14.9776	0.953784		14.9776	0.956783		14.9776	0.960683		14.9776	0.960226		14.9776	0.958494		14.9776	0.957863		14.9776	0.960567		14.9776	0.961417		14.9776	0.962656		14.9776	0.959631		14.9776	0.938348
15.0522	0.939605		15.0522	0.941092		15.0522	0.938852		15.0522	0.938049		15.0522	0.940792		15.0522	0.941644		15.0522	0.954163		15.0522	0.957522		15.0522	0.961593		15.0522	0.958428		15.0522	0.958069		15.0522	0.95934		15.0522	0.959511		15.0522	0.96248		15.0522	0.960614		15.0522	0.959034		15.0522	0.936559
15.1267	0.940232		15.1267	0.941578		15.1267	0.939384		15.1267	0.938903		15.1267	0.940558		15.1267	0.942405		15.1267	0.953948		15.1267	0.957038		15.1267	0.961262		15.1267	0.959116		15.1267	0.957908		15.1267	0.961068		15.1267	0.959931		15.1267	0.960594		15.1267	0.959143		15.1267	0.959013		15.1267	0.937712
15.2012	0.938466		15.2012	0.940741		15.2012	0.939133		15.2012	0.938357		15.2012	0.93996		15.2012	0.942802		15.2012	0.952957		15.2012	0.958144		15.2012	0.959737		15.2012	0.96068		15.2012	0.95708		15.2012	0.960524		15.2012	0.96021		15.2012	0.959387		15.2012	0.960637		15.2012	0.960086		15.2012	0.936586
15.2757	0.940009		15.2757	0.940126		15.2757	0.939641		15.2757	0.938385		15.2757	0.940137		15.2757	0.943283		15.2757	0.953447		15.2757	0.957115		15.2757	0.95985		15.2757	0.960945		15.2757	0.958262		15.2757	0.960347		15.2757	0.960745		15.2757	0.959219		15.2757	0.959966		15.2757	0.959766		15.2757	0.936692
15.3502	0.939485		15.3502	0.939947		15.3502	0.938215		15.3502	0.939757		15.3502	0.938349		15.3502	0.943643		15.3502	0.954124		15.3502	0.956715		15.3502	0.959071		15.3502	0.961661		15.3502	0.959819		15.3502	0.96091		15.3502	0.960774		15.3502	0.959624		15.3502	0.960078		15.3502	0.960146		15.3502	0.935781
15.4247	0.939772		15.4247	0.940183		15.4247	0.937693		15.4247	0.94045		15.4247	0.939374		15.4247	0.944726		15.4247	0.953515		15.4247	0.95796		15.4247	0.960219		15.4247	0.960038		15.4247	0.959152		15.4247	0.960698		15.4247	0.95926		15.4247	0.958464		15.4247	0.960775		15.4247	0.958842		15.4247	0.938118
15.4992	0.940302		15.4992	0.941917		15.4992	0.936919		15.4992	0.940676		15.4992	0.938713		15.4992	0.942709		15.4992	0.953781		15.4992	0.958051		15.4992	0.960773		15.4992	0.960214		15.4992	0.959133		15.4992	0.9604		15.4992	0.960567		15.4992	0.958889		15.4992	0.960965		15.4992	0.959205		15.4992	0.938432
15.5738	0.939052		15.5738	0.939421		15.5738	0.9378		15.5738	0.940347		15.5738	0.939739		15.5738	0.94198		15.5738	0.953008		15.5738	0.956999		15.5738	0.962069		15.5738	0.960461		15.5738	0.95891		15.5738	0.959834		15.5738	0.959596		15.5738	0.959199		15.5738	0.958976		15.5738	0.959094		15.5738	0.939335
15.6483	0.939269		15.6483	0.939424		15.6483	0.937384		15.6483	0.939292		15.6483	0.938844		15.6483	0.942861		15.6483	0.95344		15.6483	0.95627		15.6483	0.960645		15.6483	0.959955		15.6483	0.958224		15.6483	0.960487		15.6483	0.960553		15.6483	0.959697		15.6483	0.960206		15.6483	0.958608		15.6483	0.938469
15.7228	0.937629		15.7228	0.93916		15.7228	0.937436		15.7228	0.939116		15.7228	0.938352		15.7228	0.943711		15.7228	0.952542		15.7228	0.957493		15.7228	0.959778		15.7228	0.960692		15.7228	0.959341		15.7228	0.960331		15.7228	0.961533		15.7228	0.960214		15.7228	0.960204		15.7228	0.95865		15.7228	0.938027
15.7973	0.939189		15.7973	0.939289		15.7973	0.937992		15.7973	0.939465		15.7973	0.938053		15.7973	0.943407		15.7973	0.953805		15.7973	0.95796		15.7973	0.960473		15.7973	0.960254		15.7973	0.960579		15.7973	0.959871		15.7973	0.961401		15.7973	0.959025		15.7973	0.961349		15.7973	0.958785		15.7973	0.937294
15.8718	0.939948		15.8718	0.939709		15.8718	0.939258		15.8718	0.941188		15.8718	0.938508		15.8718	0.94342		15.8718	0.954005		15.8718	0.956244		15.8718	0.961819		15.8718	0.959375		15.8718	0.958842		15.8718	0.960847		15.8718	0.960048		15.8718	0.960544		15.8718	0.961291		15.8718	0.959232		15.8718	0.937718
15.9463	0.940381		15.9463	0.93915		15.9463	0.940255		15.9463	0.941295		15.9463	0.938224		15.9463	0.942836		15.9463	0.952013		15.9463	0.956647		15.9463	0.960751		15.9463	0.959116		15.9463	0.959062		15.9463	0.960667		15.9463	0.960867		15.9463	0.959025		15.9463	0.960092		15.9463	0.958833		15.9463	0.938293
16.0209	0.939064		16.0209	0.937738		16.0209	0.938546		16.0209	0.93997		16.0209	0.938648		16.0209	0.941862		16.0209	0.951957		16.0209	0.956809		16.0209	0.960927		16.0209	0.960035		16.0209	0.959558		16.0209	0.959234		16.0209	0.95982		16.0209	0.960305		16.0209	0.960611		16.0209	0.959154		16.0209	0.938196
16.0954	0.93803		16.0954	0.93738		16.0954	0.938689		16.0954	0.940315		16.0954	0.938246		16.0954	0.942433		16.0954	0.954477		16.0954	0.958644		16.0954	0.958949		16.0954	0.960637		16.0954	0.959282		16.0954	0.961528		16.0954	0.957477		16.0954	0.958998		16.0954	0.959594		16.0954	0.959828		16.0954	0.938959
16.1699	0.939219		16.1699	0.937774		16.1699	0.938674		16.1699	0.938661		16.1699	0.938118		16.1699	0.942442		16.1699	0.954417		16.1699	0.957483		16.1699	0.96037		16.1699	0.961028		16.1699	0.96011		16.1699	0.960667		16.1699	0.957792		16.1699	0.960273		16.1699	0.960037		16.1699	0.96032		16.1699	0.938151
16.2444	0.939655		16.2444	0.938495		16.2444	0.939448		16.2444	0.939088		16.2444	0.938265		16.2444	0.942051		16.2444	0.95393		16.2444	0.957386		16.2444	0.960044		16.2444	0.960282		16.2444	0.960969		16.2444	0.958522		16.2444	0.957477		16.2444	0.958794		16.2444	0.958756		16.2444	0.959724		16.2444	0.937754
16.3189	0.93803		16.3189	0.939407		16.3189	0.939677		16.3189	0.939619		16.3189	0.93708		16.3189	0.941142		16.3189	0.95365		16.3189	0.958086		16.3189	0.961484		16.3189	0.959021		16.3189	0.961193		16.3189	0.960092		16.3189	0.955953		16.3189	0.959382		16.3189	0.958484		16.3189	0.958312		16.3189	0.937948
16.3934	0.937339		16.3934	0.939622		16.3934	0.940842		16.3934	0.939126		16.3934	0.937775		16.3934	0.939475		16.3934	0.952996		16.3934	0.957954		16.3934	0.961471		16.3934	0.959684		16.3934	0.959816		16.3934	0.959974		16.3934	0.956046		16.3934	0.959267		16.3934	0.958159		16.3934	0.959214		16.3934	0.937467
16.4679	0.939175		16.4679	0.939096		16.4679	0.940585		16.4679	0.940494		16.4679	0.938754		16.4679	0.939916		16.4679	0.953136		16.4679	0.959564		16.4679	0.961988		16.4679	0.960285		16.4679	0.959065		16.4679	0.960322		16.4679	0.956139		16.4679	0.959883		16.4679	0.958452		16.4679	0.959871		16.4679	0.935735
16.5425	0.937541		16.5425	0.940854		16.5425	0.940757		16.5425	0.940118		16.5425	0.939231		16.5425	0.941449		16.5425	0.951885		16.5425	0.959512		16.5425	0.961318		16.5425	0.959289		16.5425	0.958904		16.5425	0.960751		16.5425	0.955716		16.5425	0.959019		16.5425	0.960327		16.5425	0.958995		16.5425	0.936395
16.617	0.938021		16.617	0.938992		16.617	0.941512		16.617	0.940318		16.617	0.938074		16.617	0.942073		16.617	0.9515		16.617	0.9596		16.617	0.960557		16.617	0.961488		16.617	0.958544		16.617	0.960406		16.617	0.957504		16.617	0.958437		16.617	0.959111		16.617	0.958992		16.617	0.936625
16.6915	0.937822		16.6915	0.938957		16.6915	0.939347		16.6915	0.938548		16.6915	0.938199		16.6915	0.940636		16.6915	0.951354		16.6915	0.959325		16.6915	0.960636		16.6915	0.960381		16.6915	0.958122		16.6915	0.960558		16.6915	0.957696		16.6915	0.958549		16.6915	0.960224		16.6915	0.958605		16.6915	0.937691
16.766	0.937034		16.766	0.938073		16.766	0.938203		16.766	0.939389		16.766	0.939483		16.766	0.939711		16.766	0.952622		16.766	0.959141		16.766	0.95975		16.766	0.960304		16.766	0.957883		16.766	0.959784		16.766	0.956352		16.766	0.958529		16.766	0.959808		16.766	0.958422		16.766	0.9377
16.8405	0.938332		16.8405	0.940331		16.8405	0.938949		16.8405	0.938492		16.8405	0.939439		16.8405	0.942302		16.8405	0.952327		16.8405	0.958189		16.8405	0.961406		16.8405	0.959187		16.8405	0.958603		16.8405	0.961466		16.8405	0.956163		16.8405	0.959101		16.8405	0.959084		16.8405	0.959061		16.8405	0.938638
16.915	0.939424		16.915	0.939275		16.915	0.938656		16.915	0.938344		16.915	0.939592		16.915	0.939472		16.915	0.953784		16.915	0.957315		16.915	0.961299		16.915	0.961466		16.915	0.959992		16.915	0.960565		16.915	0.957321		16.915	0.959033		16.915	0.958668		16.915	0.960113		16.915	0.937742
16.9896	0.939169		16.9896	0.93883		16.9896	0.937335		16.9896	0.939123		16.9896	0.939072		16.9896	0.940648		16.9896	0.95353		16.9896	0.95857		16.9896	0.961271		16.9896	0.961525		16.9896	0.959853		16.9896	0.962023		16.9896	0.957393		16.9896	0.958243		16.9896	0.959717		16.9896	0.958947		16.9896	0.937412
17.0641	0.940425		17.0641	0.939186		17.0641	0.937408		17.0641	0.937971		17.0641	0.938704		17.0641	0.941142		17.0641	0.953002		17.0641	0.958773		17.0641	0.960974		17.0641	0.961041		17.0641	0.958466		17.0641	0.96119		17.0641	0.957654		17.0641	0.958195		17.0641	0.959705		17.0641	0.957982		17.0641	0.936643
17.1386	0.94017		17.1386	0.93858		17.1386	0.939861		17.1386	0.938231		17.1386	0.939639		17.1386	0.941315		17.1386	0.951673		17.1386	0.958744		17.1386	0.960761		17.1386	0.960843		17.1386	0.958901		17.1386	0.96068		17.1386	0.957213		17.1386	0.957762		17.1386	0.958912		17.1386	0.958087		17.1386	0.935793
17.2131	0.939201		17.2131	0.93733		17.2131	0.939188		17.2131	0.938897		17.2131	0.938439		17.2131	0.941824		17.2131	0.952626		17.2131	0.958122		17.2131	0.962373		17.2131	0.960575		17.2131	0.959871		17.2131	0.960465		17.2131	0.958491		17.2131	0.957116		17.2131	0.959225		17.2131	0.958989		17.2131	0.935974
17.2876	0.939749		17.2876	0.937608		17.2876	0.93713		17.2876	0.93921		17.2876	0.938059		17.2876	0.941288		17.2876	0.953154		17.2876	0.958112		17.2876	0.962726		17.2876	0.959708		17.2876	0.959186		17.2876	0.958799		17.2876	0.957132		17.2876	0.959163		17.2876	0.959257		17.2876	0.958878		17.2876	0.936023
17.3621	0.9388		17.3621	0.938674		17.3621	0.937329		17.3621	0.939512		17.3621	0.940131		17.3621	0.941039		17.3621	0.954265		17.3621	0.958286		17.3621	0.962006		17.3621	0.959477		17.3621	0.9582		17.3621	0.958317		17.3621	0.956586		17.3621	0.958426		17.3621	0.957505		17.3621	0.958449		17.3621	0.936262
17.4366	0.939553		17.4366	0.938389		17.4366	0.936317		17.4366	0.938347		17.4366	0.939361		17.4366	0.940806		17.4366	0.953252		17.4366	0.957312		17.4366	0.960767		17.4366	0.959924		17.4366	0.960067		17.4366	0.958494		17.4366	0.956757		17.4366	0.958378		17.4366	0.958554		17.4366	0.957874		17.4366	0.936501
17.5112	0.939696		17.5112	0.938306		17.5112	0.93872		17.5112	0.939082		17.5112	0.939533		17.5112	0.941638		17.5112	0.953139		17.5112	0.958567		17.5112	0.960902		17.5112	0.958956		17.5112	0.960321		17.5112	0.958631		17.5112	0.956988		17.5112	0.959739		17.5112	0.958912		17.5112	0.957208		17.5112	0.936489
17.5857	0.939863		17.5857	0.938179		17.5857	0.938998		17.5857	0.939229		17.5857	0.939446		17.5857	0.94067		17.5857	0.95425		17.5857	0.958903		17.5857	0.960326		17.5857	0.959835		17.5857	0.960923		17.5857	0.959175		17.5857	0.958083		17.5857	0.960565		17.5857	0.958135		17.5857	0.958479		17.5857	0.938729
17.6602	0.940636		17.6602	0.939204		17.6602	0.938766		17.6602	0.93809		17.6602	0.939732		17.6602	0.94085		17.6602	0.954005		17.6602	0.959942		17.6602	0.960692		17.6602	0.959144		17.6602	0.959344		17.6602	0.960285		17.6602	0.958539		17.6602	0.961182		17.6602	0.959726		17.6602	0.957115		17.6602	0.93602
17.7347	0.939049		17.7347	0.93832		17.7347	0.938396		17.7347	0.937151		17.7347	0.939954		17.7347	0.939432		17.7347	0.953312		17.7347	0.959864		17.7347	0.962407		17.7347	0.960495		17.7347	0.959937		17.7347	0.960428		17.7347	0.956757		17.7347	0.960391		17.7347	0.958405		17.7347	0.957142		17.7347	0.935917
17.8092	0.938706		17.8092	0.939461		17.8092	0.937861		17.8092	0.937613		17.8092	0.940624		17.8092	0.940822		17.8092	0.954874		17.8092	0.959064		17.8092	0.962185		17.8092	0.960125		17.8092	0.960182		17.8092	0.959744		17.8092	0.957648		17.8092	0.960556		17.8092	0.957617		17.8092	0.957562		17.8092	0.936008
17.8837	0.939342		17.8837	0.938903		17.8837	0.938032		17.8837	0.937647		17.8837	0.940122		17.8837	0.94139		17.8837	0.95287		17.8837	0.957599		17.8837	0.960924		17.8837	0.961479		17.8837	0.961317		17.8837	0.959557		17.8837	0.95775		17.8837	0.959302		17.8837	0.958159		17.8837	0.957661		17.8837	0.935254
17.9583	0.938425		17.9583	0.940428		17.9583	0.937378		17.9583	0.93863		17.9583	0.94092		17.9583	0.940751		17.9583	0.9529		17.9583	0.958864		17.9583	0.96206		17.9583	0.961852		17.9583	0.960389		17.9583	0.958562		17.9583	0.957861		17.9583	0.960069		17.9583	0.959621		17.9583	0.958078		17.9583	0.936077
18.0328	0.939719		18.0328	0.940333		18.0328	0.937852		18.0328	0.938812		18.0328	0.940427		18.0328	0.940068		18.0328	0.952975		18.0328	0.958486		18.0328	0.961199		18.0328	0.961725		18.0328	0.960479		18.0328	0.957676		18.0328	0.95785		18.0328	0.959426		18.0328	0.961311		18.0328	0.95758		18.0328	0.935033
18.1073	0.940109		18.1073	0.939782		18.1073	0.938671		18.1073	0.939763		18.1073	0.939025		18.1073	0.941648		18.1073	0.952431		18.1073	0.958632		18.1073	0.960041		18.1073	0.961105		18.1073	0.959422		18.1073	0.958696		18.1073	0.957307		18.1073	0.959025		18.1073	0.960494		18.1073	0.958731		18.1073	0.935221
18.1818	0.939078		18.1818	0.938292		18.1818	0.938066		18.1818	0.940278		18.1818	0.937953		18.1818	0.94152		18.1818	0.953064		18.1818	0.958196		18.1818	0.961193		18.1818	0.961913		18.1818	0.958705		18.1818	0.958537		18.1818	0.958068		18.1818	0.959084		18.1818	0.959509		18.1818	0.959313		18.1818	0.934585
18.2563	0.939321		18.2563	0.93932		18.2563	0.937989		18.2563	0.939741		18.2563	0.937108		18.2563	0.941517		18.2563	0.952843		18.2563	0.958028		18.2563	0.9599		18.2563	0.96035		18.2563	0.958472		18.2563	0.957922		18.2563	0.958284		18.2563	0.959635		18.2563	0.95909		18.2563	0.960587		18.2563	0.934742
18.3308	0.938045		18.3308	0.93803		18.3308	0.93713		18.3308	0.939349		18.3308	0.937697		18.3308	0.942023		18.3308	0.953133		18.3308	0.957728		18.3308	0.959537		18.3308	0.958981		18.3308	0.958578		18.3308	0.958705		18.3308	0.958161		18.3308	0.958635		18.3308	0.95851		18.3308	0.960635		18.3308	0.935754
18.4054	0.937843		18.4054	0.937519		18.4054	0.936797		18.4054	0.940011		18.4054	0.936925		18.4054	0.940803		18.4054	0.954184		18.4054	0.95607		18.4054	0.960855		18.4054	0.96088		18.4054	0.960703		18.4054	0.959498		18.4054	0.95832		18.4054	0.958972		18.4054	0.957417		18.4054	0.958941		18.4054	0.935342
18.4799	0.937245		18.4799	0.937519		18.4799	0.937879		18.4799	0.938777		18.4799	0.936379		18.4799	0.940459		18.4799	0.95365		18.4799	0.956037		18.4799	0.960667		18.4799	0.960655		18.4799	0.961156		18.4799	0.959013		18.4799	0.957375		18.4799	0.958957		18.4799	0.956872		18.4799	0.957631		18.4799	0.934243
18.5544	0.938598		18.5544	0.938235		18.5544	0.937894		18.5544	0.940077		18.5544	0.938068		18.5544	0.939099		18.5544	0.954659		18.5544	0.955534		18.5544	0.961327		18.5544	0.961556		18.5544	0.961131		18.5544	0.9604		18.5544	0.958717		18.5544	0.957897		18.5544	0.957915		18.5544	0.958482		18.5544	0.935342
18.6289	0.93914		18.6289	0.937941		18.6289	0.938105		18.6289	0.938824		18.6289	0.937289		18.6289	0.940369		18.6289	0.95339		18.6289	0.957325		18.6289	0.962163		18.6289	0.959807		18.6289	0.96016		18.6289	0.959818		18.6289	0.958983		18.6289	0.957393		18.6289	0.957804		18.6289	0.957736		18.6289	0.933934
18.7034	0.938645		18.7034	0.937672		18.7034	0.936931		18.7034	0.938244		18.7034	0.937825		18.7034	0.940841		18.7034	0.953444		18.7034	0.95738		18.7034	0.961503		18.7034	0.961164		18.7034	0.961308		18.7034	0.960729		18.7034	0.959586		18.7034	0.957582		18.7034	0.958352		18.7034	0.957613		18.7034	0.935163
18.7779	0.938446		18.7779	0.938063		18.7779	0.937867		18.7779	0.938633		18.7779	0.938657		18.7779	0.939934		18.7779	0.95365		18.7779	0.95768		18.7779	0.961819		18.7779	0.95936		18.7779	0.96221		18.7779	0.960322		18.7779	0.960402		18.7779	0.957481		18.7779	0.9589		18.7779	0.958264		18.7779	0.936129
18.8524	0.937348		18.8524	0.937946		18.8524	0.937549		18.8524	0.938335		18.8524	0.93799		18.8524	0.939689		18.8524	0.952551		18.8524	0.957896		18.8524	0.960301		18.8524	0.960137		18.8524	0.961674		18.8524	0.962073		18.8524	0.959292		18.8524	0.958134		18.8524	0.961563		18.8524	0.957562		18.8524	0.936029
18.927	0.938092		18.927	0.938558		18.927	0.935882		18.927	0.936662		18.927	0.93775		18.927	0.940372		18.927	0.951963		18.927	0.958206		18.927	0.959841		18.927	0.959304		18.927	0.960669		18.927	0.961684		18.927	0.957627		18.927	0.95847		18.927	0.960086		18.927	0.959148		18.927	0.937185
19.0015	0.937008		19.0015	0.93837		19.0015	0.936399		19.0015	0.936439		19.0015	0.936124		19.0015	0.939689		19.0015	0.951709		19.0015	0.958073		19.0015	0.959609		19.0015	0.958962		19.0015	0.961342		19.0015	0.960033		19.0015	0.957414		19.0015	0.958874		19.0015	0.960757		19.0015	0.960143		19.0015	0.937203
19.076	0.937283		19.076	0.937623		19.076	0.937674		19.076	0.938338		19.076	0.938542		19.076	0.941589		19.076	0.950834		19.076	0.959519		19.076	0.958927		19.076	0.958786		19.076	0.959747		19.076	0.960742		19.076	0.957477		19.076	0.958697		19.076	0.960971		19.076	0.95818		19.076	0.93589
19.1505	0.938862		19.1505	0.937587		19.1505	0.936995		19.1505	0.938131		19.1505	0.936769		19.1505	0.941098		19.1505	0.951521		19.1505	0.95869		19.1505	0.960617		19.1505	0.959548		19.1505	0.960216		19.1505	0.960555		19.1505	0.957711		19.1505	0.959865		19.1505	0.960781		19.1505	0.958458		19.1505	0.935393
19.225	0.938124		19.225	0.937514		19.225	0.936356		19.225	0.937384		19.225	0.936629		19.225	0.939199		19.225	0.951255		19.225	0.957744		19.225	0.961478		19.225	0.960433		19.225	0.960467		19.225	0.959694		19.225	0.957627		19.225	0.95914		19.225	0.95955		19.225	0.959037		19.225	0.936162
19.2995	0.938191		19.2995	0.936904		19.2995	0.936356		19.2995	0.937431		19.2995	0.937601		19.2995	0.939456		19.2995	0.952085		19.2995	0.95777		19.2995	0.960636		19.2995	0.961232		19.2995	0.959031		19.2995	0.960487		19.2995	0.957867		19.2995	0.959075		19.2995	0.958516		19.2995	0.959751		19.2995	0.935838
19.3741	0.93743		19.3741	0.936076		19.3741	0.935891		19.3741	0.937173		19.3741	0.937969		19.3741	0.939916		19.3741	0.954118		19.3741	0.958238		19.3741	0.959822		19.3741	0.959212		19.3741	0.959105		19.3741	0.95901		19.3741	0.959415		19.3741	0.957537		19.3741	0.956618		19.3741	0.95999		19.3741	0.93427
19.4486	0.938112		19.4486	0.937632		19.4486	0.935647		19.4486	0.93669		19.4486	0.936784		19.4486	0.938935		19.4486	0.951076		19.4486	0.959325		19.4486	0.9601		19.4486	0.958857		19.4486	0.959462		19.4486	0.961379		19.4486	0.959226		19.4486	0.957316		19.4486	0.956902		19.4486	0.959682		19.4486	0.936855
19.5231	0.93716		19.5231	0.938804		19.5231	0.935148		19.5231	0.936769		19.5231	0.937367		19.5231	0.940481		19.5231	0.951554		19.5231	0.958693		19.5231	0.960163		19.5231	0.958897		19.5231	0.96092		19.5231	0.961665		19.5231	0.958983		19.5231	0.957865		19.5231	0.956741		19.5231	0.958773		19.5231	0.936986
19.5976	0.937348		19.5976	0.939784		19.5976	0.935482		19.5976	0.93771		19.5976	0.936978		19.5976	0.939717		19.5976	0.950966		19.5976	0.958344		19.5976	0.959781		19.5976	0.959693		19.5976	0.959357		19.5976	0.960537		19.5976	0.957978		19.5976	0.957437		19.5976	0.957171		19.5976	0.958701		19.5976	0.936435
19.6721	0.938457		19.6721	0.939365		19.6721	0.936543		19.6721	0.937905		19.6721	0.93737		19.6721	0.939562		19.6721	0.951371		19.6721	0.959022		19.6721	0.960094		19.6721	0.961047		19.6721	0.961292		19.6721	0.961901		19.6721	0.960417		19.6721	0.957316		19.6721	0.956468		19.6721	0.958761		19.6721	0.936574
19.7466	0.938621		19.7466	0.939855		19.7466	0.93761		19.7466	0.938489		19.7466	0.936787		19.7466	0.940031		19.7466	0.952485		19.7466	0.959338		19.7466	0.96144		19.7466	0.962154		19.7466	0.961202		19.7466	0.961205		19.7466	0.957741		19.7466	0.956874		19.7466	0.957948		19.7466	0.958216		19.7466	0.937225
19.8211	0.940033		19.8211	0.93907		19.8211	0.937607		19.8211	0.937829		19.8211	0.936413		19.8211	0.939956		19.8211	0.953288		19.8211	0.957654		19.8211	0.962119		19.8211	0.963496		19.8211	0.960095		19.8211	0.961976		19.8211	0.957687		19.8211	0.956859		19.8211	0.956026		19.8211	0.958482		19.8211	0.936423
19.8957	0.938469		19.8957	0.937745		19.8957	0.937035		19.8957	0.938429		19.8957	0.937246		19.8957	0.940726		19.8957	0.95376		19.8957	0.956731		19.8957	0.961693		19.8957	0.962928		19.8957	0.959902		19.8957	0.96211		19.8957	0.957967		19.8957	0.95765		19.8957	0.957124		19.8957	0.959409		19.8957	0.935115
19.9702	0.938867		19.9702	0.937283		19.9702	0.938105		19.9702	0.937905		19.9702	0.937227		19.9702	0.940245		19.9702	0.954336		19.9702	0.957002		19.9702	0.962429		19.9702	0.961565		19.9702	0.961342		19.9702	0.96224		19.9702	0.957738		19.9702	0.956278		19.9702	0.957127		19.9702	0.960167		19.9702	0.935723
20.0447	0.939479		20.0447	0.939334		20.0447	0.938732		20.0447	0.937688		20.0447	0.937635		20.0447	0.940117		20.0447	0.955316		20.0447	0.957944		20.0447	0.962585		20.0447	0.962521		20.0447	0.961466		20.0447	0.961025		20.0447	0.957759		20.0447	0.95808		20.0447	0.958305		20.0447	0.959124		20.0447	0.935194
20.1192	0.939116		20.1192	0.939226		20.1192	0.936628		20.1192	0.937544		20.1192	0.936803		20.1192	0.939286		20.1192	0.955196		20.1192	0.95867		20.1192	0.960924		20.1192	0.962327		20.1192	0.961739		20.1192	0.960167		20.1192	0.958329		20.1192	0.959585		20.1192	0.957154		20.1192	0.959385		20.1192	0.936553
20.1937	0.938601		20.1937	0.939327		20.1937	0.936213		20.1937	0.936634		20.1937	0.93704		20.1937	0.939618		20.1937	0.952515		20.1937	0.959509		20.1937	0.961653		20.1937	0.961195		20.1937	0.961686		20.1937	0.958226		20.1937	0.957093		20.1937	0.959299		20.1937	0.958803		20.1937	0.958539		20.1937	0.936362
20.2682	0.938217		20.2682	0.939178		20.2682	0.937011		20.2682	0.937227		20.2682	0.937981		20.2682	0.939742		20.2682	0.952013		20.2682	0.960129		20.2682	0.960479		20.2682	0.962025		20.2682	0.960811		20.2682	0.958823		20.2682	0.956775		20.2682	0.961149		20.2682	0.959219		20.2682	0.959975		20.2682	0.936928
20.3428	0.937005		20.3428	0.938396		20.3428	0.937265		20.3428	0.938645		20.3428	0.936563		20.3428	0.938556		20.3428	0.951933		20.3428	0.96109		20.3428	0.961449		20.3428	0.96278		20.3428	0.960963		20.3428	0.95697		20.3428	0.958257		20.3428	0.959281		20.3428	0.960883		20.3428	0.959427		20.3428	0.937346
20.4173	0.938399		20.4173	0.938363		20.4173	0.937849		20.4173	0.938445		20.4173	0.935915		20.4173	0.93882		20.4173	0.951876		20.4173	0.959945		20.4173	0.960573		20.4173	0.961941		20.4173	0.96203		20.4173	0.958335		20.4173	0.957705		20.4173	0.958629		20.4173	0.960385		20.4173	0.959139		20.4173	0.937119
20.4918	0.938914		20.4918	0.938002		20.4918	0.938234		20.4918	0.938369		20.4918	0.936426		20.4918	0.938491		20.4918	0.951575		20.4918	0.95918		20.4918	0.960551		20.4918	0.96142		20.4918	0.959825		20.4918	0.958118		20.4918	0.957912		20.4918	0.958727		20.4918	0.959872		20.4918	0.958302		20.4918	0.936423
20.5663	0.93943		20.5663	0.93734		20.5663	0.939194		20.5663	0.938366		20.5663	0.935884		20.5663	0.938839		20.5663	0.951769		20.5663	0.958796		20.5663	0.960551		20.5663	0.961272		20.5663	0.959831		20.5663	0.958506		20.5663	0.958393		20.5663	0.959042		20.5663	0.959893		20.5663	0.958554		20.5663	0.937237
20.6408	0.938949		20.6408	0.937378		20.6408	0.938017		20.6408	0.937465		20.6408	0.936794		20.6408	0.937694		20.6408	0.95181		20.6408	0.95958		20.6408	0.96092		20.6408	0.961698		20.6408	0.958559		20.6408	0.959088		20.6408	0.957468		20.6408	0.960527		20.6408	0.958214		20.6408	0.958836		20.6408	0.935599
20.7153	0.939488		20.7153	0.938219		20.7153	0.938619		20.7153	0.938655		20.7153	0.936978		20.7153	0.939155		20.7153	0.952046		20.7153	0.960577		20.7153	0.959778		20.7153	0.962549		20.7153	0.959881		20.7153	0.958817		20.7153	0.957003		20.7153	0.959317		20.7153	0.958062		20.7153	0.958162		20.7153	0.93658
20.7899	0.940771		20.7899	0.937151		20.7899	0.936919		20.7899	0.937914		20.7899	0.936735		20.7899	0.940058		20.7899	0.953175		20.7899	0.959035		20.7899	0.961693		20.7899	0.961374		20.7899	0.959468		20.7899	0.958715		20.7899	0.958302		20.7899	0.958738		20.7899	0.958041		20.7899	0.958398		20.7899	0.937258
20.8644	0.94094		20.8644	0.938372		20.8644	0.937913		20.8644	0.938109		20.8644	0.936632		20.8644	0.939972		20.8644	0.954303		20.8644	0.959751		20.8644	0.962601		20.8644	0.959896		20.8644	0.959667		20.8644	0.959193		20.8644	0.958338		20.8644	0.958243		20.8644	0.957288		20.8644	0.959127		20.8644	0.936925
20.9389	0.94085		20.9389	0.939381		20.9389	0.936298		20.9389	0.937855		20.9389	0.938109		20.9389	0.941204		20.9389	0.95387		20.9389	0.959474		20.9389	0.964169		20.9389	0.961781		20.9389	0.959623		20.9389	0.959333		20.9389	0.959043		20.9389	0.959278		20.9389	0.958633		20.9389	0.960623		20.9389	0.937809
21.0134	0.946843		21.0134	0.944279		21.0134	0.942683		21.0134	0.944292		21.0134	0.944559		21.0134	0.946709		21.0134	0.960176		21.0134	0.965643		21.0134	0.96763		21.0134	0.966833		21.0134	0.966131		21.0134	0.963776		21.0134	0.963582		21.0134	0.964964		21.0134	0.964364		21.0134	0.964964		21.0134	0.943954
21.0879	0.94985		21.0879	0.947702		21.0879	0.945454		21.0879	0.948736		21.0879	0.947111		21.0879	0.951005		21.0879	0.96172		21.0879	0.967911		21.0879	0.970788		21.0879	0.970965		21.0879	0.969133		21.0879	0.96696		21.0879	0.966372		21.0879	0.967658		21.0879	0.967575		21.0879	0.967096		21.0879	0.947692
21.1624	0.951839		21.1624	0.950493		21.1624	0.947664		21.1624	0.951075		21.1624	0.949651		21.1624	0.951542		21.1624	0.965034		21.1624	0.96804		21.1624	0.971611		21.1624	0.971767		21.1624	0.969313		21.1624	0.969612		21.1624	0.968499		21.1624	0.968594		21.1624	0.969702		21.1624	0.967611		21.1624	0.948512
21.2369	0.952084		21.2369	0.952344		21.2369	0.949796		21.2369	0.953331		21.2369	0.95187		21.2369	0.952736		21.2369	0.965777		21.2369	0.970115		21.2369	0.972281		21.2369	0.973448		21.2369	0.970827		21.2369	0.970427		21.2369	0.968829		21.2369	0.969972		21.2369	0.970947		21.2369	0.967369		21.2369	0.950286
21.3115	0.953923		21.3115	0.953574		21.3115	0.951569		21.3115	0.954		21.3115	0.953157		21.3115	0.953838		21.3115	0.967401		21.3115	0.97237		21.3115	0.974428		21.3115	0.973954		21.3115	0.971466		21.3115	0.971251		21.3115	0.969852		21.3115	0.969576		21.3115	0.971867		21.3115	0.968037		21.3115	0.949487
21.386	0.955484		21.386	0.954885		21.386	0.951362		21.386	0.954584		21.386	0.953216		21.386	0.955989		21.386	0.966927		21.386	0.973303		21.386	0.975915		21.386	0.974904		21.386	0.97235		21.386	0.973798		21.386	0.970539		21.386	0.970951		21.386	0.972634		21.386	0.969104		21.386	0.950392
21.4605	0.955115		21.4605	0.954687		21.4605	0.952206		21.4605	0.954364		21.4605	0.95545		21.4605	0.959002		21.4605	0.968258		21.4605	0.973141		21.4605	0.976929		21.4605	0.975033		21.4605	0.972796		21.4605	0.973686		21.4605	0.971206		21.4605	0.971553		21.4605	0.971961		21.4605	0.969698		21.4605	0.951206
21.535	0.956266		21.535	0.95571		21.535	0.952945		21.535	0.955522		21.535	0.955986		21.535	0.958422		21.535	0.968518		21.535	0.974074		21.535	0.979007		21.535	0.976215		21.535	0.974515		21.535	0.973676		21.535	0.970368		21.535	0.972252		21.535	0.973118		21.535	0.970906		21.535	0.952126
21.6095	0.957598		21.6095	0.95566		21.6095	0.953508		21.6095	0.956994		21.6095	0.956002		21.6095	0.958698		21.6095	0.968545		21.6095	0.974526		21.6095	0.979348		21.6095	0.976751		21.6095	0.974958		21.6095	0.975206		21.6095	0.972403		21.6095	0.973506		21.6095	0.973256		21.6095	0.972288		21.6095	0.954684
21.684	0.9598		21.684	0.957058		21.684	0.956205		21.684	0.9591		21.684	0.955048		21.684	0.958552		21.684	0.969825		21.684	0.973974		21.684	0.978343		21.684	0.975681		21.684	0.977068		21.684	0.975452		21.684	0.973171		21.684	0.972607		21.684	0.97407		21.684	0.973787		21.684	0.955435
