# Supplementary material for: Energy coupling and stoichiometry of Zn2+/H+ antiport by the prokaryotic cation diffusion facilitator YiiP
Source: eLife. 2023 Oct 31;12:RP87167. doi: 10.7554/eLife.87167 (PMC10617992; doi:10.7554/eLife.87167)
Supplement: Figure 4—figure supplement 1—source data 3. [file elife-87167-fig4-figsupp1-data3.xlsx]

## Sheet: RawData
NanoTemper Technologies	NanoTemper Technologies
MO.Affinity Analysis v2.3	MO.Affinity Analysis v2.3
Origin of exported data	Origin of exported data
Project Title:
Comment:
Project File Path:	C:\Users\nanotemper\Desktop\Adel\YiiP\site B pH\site B 3222022.nta
Analysis-Set Name:	Analysis-Set #2
Exported from:	MST Traces
Exported on:	2023-09-25 16:08:21
Analysis Settings	Analysis Settings
Type of Analysis:	MST
Evaluation strategy:	Manual
Cold Region Start:	-1
Cold Region End:	0
Hot Region Start:	14
Hot Region End:	15
Sample Information	Sample Information		Sample Information	Sample Information		Sample Information	Sample Information		Sample Information	Sample Information		Sample Information	Sample Information		Sample Information	Sample Information		Sample Information	Sample Information		Sample Information	Sample Information		Sample Information	Sample Information		Sample Information	Sample Information		Sample Information	Sample Information		Sample Information	Sample Information		Sample Information	Sample Information		Sample Information	Sample Information		Sample Information	Sample Information		Sample Information	Sample Information		Sample Information	Sample Information
Merge-Set Name:	6.9		Merge-Set Name:	6.9		Merge-Set Name:	6.9		Merge-Set Name:	6.9		Merge-Set Name:	6.9		Merge-Set Name:	6.9		Merge-Set Name:	6.9		Merge-Set Name:	6.9		Merge-Set Name:	6.9		Merge-Set Name:	6.9		Merge-Set Name:	6.9		Merge-Set Name:	6.9		Merge-Set Name:	6.9		Merge-Set Name:	6.9		Merge-Set Name:	6.9		Merge-Set Name:	6.9		Merge-Set Name:	6.9
Run Name:	MyTarget_120_MyLigand (#39)		Run Name:	MyTarget_120_MyLigand (#39)		Run Name:	MyTarget_120_MyLigand (#39)		Run Name:	MyTarget_120_MyLigand (#39)		Run Name:	MyTarget_120_MyLigand (#39)		Run Name:	MyTarget_120_MyLigand (#39)		Run Name:	MyTarget_120_MyLigand (#39)		Run Name:	MyTarget_120_MyLigand (#39)		Run Name:	MyTarget_120_MyLigand (#39)		Run Name:	MyTarget_120_MyLigand (#39)		Run Name:	MyTarget_120_MyLigand (#39)		Run Name:	MyTarget_120_MyLigand (#39)		Run Name:	MyTarget_120_MyLigand (#39)		Run Name:	MyTarget_120_MyLigand (#38)		Run Name:	MyTarget_120_MyLigand (#38)		Run Name:	MyTarget_120_MyLigand (#38)		Run Name:	MyTarget_120_MyLigand (#38)
Date of Measurement:	2022-03-25 17:07:11		Date of Measurement:	2022-03-25 17:07:52		Date of Measurement:	2022-03-25 17:08:33		Date of Measurement:	2022-03-25 17:09:14		Date of Measurement:	2022-03-25 17:09:54		Date of Measurement:	2022-03-25 17:10:35		Date of Measurement:	2022-03-25 17:11:16		Date of Measurement:	2022-03-25 17:11:57		Date of Measurement:	2022-03-25 17:12:37		Date of Measurement:	2022-03-25 17:13:18		Date of Measurement:	2022-03-25 17:13:59		Date of Measurement:	2022-03-25 17:14:40		Date of Measurement:	2022-03-25 17:15:21		Date of Measurement:	2022-03-25 16:33:17		Date of Measurement:	2022-03-25 16:33:58		Date of Measurement:	2022-03-25 16:34:39		Date of Measurement:	2022-03-25 16:35:20
Capillary Type:	Unspecified container/capillary type		Capillary Type:	Unspecified container/capillary type		Capillary Type:	Unspecified container/capillary type		Capillary Type:	Unspecified container/capillary type		Capillary Type:	Unspecified container/capillary type		Capillary Type:	Unspecified container/capillary type		Capillary Type:	Unspecified container/capillary type		Capillary Type:	Unspecified container/capillary type		Capillary Type:	Unspecified container/capillary type		Capillary Type:	Unspecified container/capillary type		Capillary Type:	Unspecified container/capillary type		Capillary Type:	Unspecified container/capillary type		Capillary Type:	Unspecified container/capillary type		Capillary Type:	Unspecified container/capillary type		Capillary Type:	Unspecified container/capillary type		Capillary Type:	Unspecified container/capillary type		Capillary Type:	Unspecified container/capillary type
Capillary Position:	4		Capillary Position:	5		Capillary Position:	6		Capillary Position:	7		Capillary Position:	8		Capillary Position:	9		Capillary Position:	10		Capillary Position:	11		Capillary Position:	12		Capillary Position:	13		Capillary Position:	14		Capillary Position:	15		Capillary Position:	16		Capillary Position:	4		Capillary Position:	5		Capillary Position:	6		Capillary Position:	7
Ligand:	MyLigand		Ligand:	MyLigand		Ligand:	MyLigand		Ligand:	MyLigand		Ligand:	MyLigand		Ligand:	MyLigand		Ligand:	MyLigand		Ligand:	MyLigand		Ligand:	MyLigand		Ligand:	MyLigand		Ligand:	MyLigand		Ligand:	MyLigand		Ligand:	MyLigand		Ligand:	MyLigand		Ligand:	MyLigand		Ligand:	MyLigand		Ligand:	MyLigand
Ligand Concentration:	2.2391e-05		Ligand Concentration:	6.9e-06		Ligand Concentration:	2.87e-06		Ligand Concentration:	1.323e-06		Ligand Concentration:	6.36e-07		Ligand Concentration:	3.12e-07		Ligand Concentration:	1.55e-07		Ligand Concentration:	7.7e-08		Ligand Concentration:	3.84e-08		Ligand Concentration:	1.92e-08		Ligand Concentration:	9.6e-09		Ligand Concentration:	4.8e-09		Ligand Concentration:	2.4e-09		Ligand Concentration:	2.2391e-05		Ligand Concentration:	6.9e-06		Ligand Concentration:	2.87e-06		Ligand Concentration:	1.323e-06
Target:	MyTarget		Target:	MyTarget		Target:	MyTarget		Target:	MyTarget		Target:	MyTarget		Target:	MyTarget		Target:	MyTarget		Target:	MyTarget		Target:	MyTarget		Target:	MyTarget		Target:	MyTarget		Target:	MyTarget		Target:	MyTarget		Target:	MyTarget		Target:	MyTarget		Target:	MyTarget		Target:	MyTarget
TargetConcentration:	1.2e-07		TargetConcentration:	1.2e-07		TargetConcentration:	1.2e-07		TargetConcentration:	1.2e-07		TargetConcentration:	1.2e-07		TargetConcentration:	1.2e-07		TargetConcentration:	1.2e-07		TargetConcentration:	1.2e-07		TargetConcentration:	1.2e-07		TargetConcentration:	1.2e-07		TargetConcentration:	1.2e-07		TargetConcentration:	1.2e-07		TargetConcentration:	1.2e-07		TargetConcentration:	1.2e-07		TargetConcentration:	1.2e-07		TargetConcentration:	1.2e-07		TargetConcentration:	1.2e-07
Measurement Settings	Measurement Settings		Measurement Settings	Measurement Settings		Measurement Settings	Measurement Settings		Measurement Settings	Measurement Settings		Measurement Settings	Measurement Settings		Measurement Settings	Measurement Settings		Measurement Settings	Measurement Settings		Measurement Settings	Measurement Settings		Measurement Settings	Measurement Settings		Measurement Settings	Measurement Settings		Measurement Settings	Measurement Settings		Measurement Settings	Measurement Settings		Measurement Settings	Measurement Settings		Measurement Settings	Measurement Settings		Measurement Settings	Measurement Settings		Measurement Settings	Measurement Settings		Measurement Settings	Measurement Settings
MST-Power:	Medium		MST-Power:	Medium		MST-Power:	Medium		MST-Power:	Medium		MST-Power:	Medium		MST-Power:	Medium		MST-Power:	Medium		MST-Power:	Medium		MST-Power:	Medium		MST-Power:	Medium		MST-Power:	Medium		MST-Power:	Medium		MST-Power:	Medium		MST-Power:	Medium		MST-Power:	Medium		MST-Power:	Medium		MST-Power:	Medium
Excitation-Power:	20		Excitation-Power:	20		Excitation-Power:	20		Excitation-Power:	20		Excitation-Power:	20		Excitation-Power:	20		Excitation-Power:	20		Excitation-Power:	20		Excitation-Power:	20		Excitation-Power:	20		Excitation-Power:	20		Excitation-Power:	20		Excitation-Power:	20		Excitation-Power:	20		Excitation-Power:	20		Excitation-Power:	20		Excitation-Power:	20
Excitation type:	Nano - BLUE		Excitation type:	Nano - BLUE		Excitation type:	Nano - BLUE		Excitation type:	Nano - BLUE		Excitation type:	Nano - BLUE		Excitation type:	Nano - BLUE		Excitation type:	Nano - BLUE		Excitation type:	Nano - BLUE		Excitation type:	Nano - BLUE		Excitation type:	Nano - BLUE		Excitation type:	Nano - BLUE		Excitation type:	Nano - BLUE		Excitation type:	Nano - BLUE		Excitation type:	Nano - BLUE		Excitation type:	Nano - BLUE		Excitation type:	Nano - BLUE		Excitation type:	Nano - BLUE
Thermostat Setpoint:	37		Thermostat Setpoint:	37		Thermostat Setpoint:	37		Thermostat Setpoint:	37		Thermostat Setpoint:	37		Thermostat Setpoint:	37		Thermostat Setpoint:	37		Thermostat Setpoint:	37		Thermostat Setpoint:	37		Thermostat Setpoint:	37		Thermostat Setpoint:	37		Thermostat Setpoint:	37		Thermostat Setpoint:	37		Thermostat Setpoint:	37		Thermostat Setpoint:	37		Thermostat Setpoint:	37		Thermostat Setpoint:	37
Included	Included		Included	Included		Included	Included		Included	Included		Included	Included		Included	Included		Included	Included		Included	Included		Included	Included		Included	Included		Included	Included		Included	Included		Included	Included		Included	Included		Included	Included		Included	Included		Included	Included
Time [s]	Normalized Fluorescence [-]		Time [s]	Normalized Fluorescence [-]		Time [s]	Normalized Fluorescence [-]		Time [s]	Normalized Fluorescence [-]		Time [s]	Normalized Fluorescence [-]		Time [s]	Normalized Fluorescence [-]		Time [s]	Normalized Fluorescence [-]		Time [s]	Normalized Fluorescence [-]		Time [s]	Normalized Fluorescence [-]		Time [s]	Normalized Fluorescence [-]		Time [s]	Normalized Fluorescence [-]		Time [s]	Normalized Fluorescence [-]		Time [s]	Normalized Fluorescence [-]		Time [s]	Normalized Fluorescence [-]		Time [s]	Normalized Fluorescence [-]		Time [s]	Normalized Fluorescence [-]		Time [s]	Normalized Fluorescence [-]
-3.57675	0.998284		-3.57675	0.998169		-3.57675	0.999563		-3.57675	0.999395		-3.57675	1.00101		-3.57675	0.998091		-3.57675	1.00084		-3.57675	0.997507		-3.57675	1.0001		-3.57675	0.998533		-3.57675	0.998718		-3.57675	1.00001		-3.57675	0.998128		-3.57675	0.997509		-3.57675	0.999707		-3.57675	0.999189		-3.57675	0.999559
-3.50223	0.999526		-3.50223	1.00028		-3.50223	0.999838		-3.50223	0.999247		-3.50223	1.00055		-3.50223	1.0003		-3.50223	1.00124		-3.50223	0.999017		-3.50223	1.00072		-3.50223	0.999517		-3.50223	0.999293		-3.50223	0.999763		-3.50223	0.999256		-3.50223	0.997335		-3.50223	1.00088		-3.50223	0.999885		-3.50223	0.99897
-3.42772	1.00019		-3.42772	0.999627		-3.42772	1.00033		-3.42772	0.999025		-3.42772	1.00033		-3.42772	1.0002		-3.42772	1.00034		-3.42772	1.00002		-3.42772	0.999861		-3.42772	0.999169		-3.42772	0.999333		-3.42772	1.00115		-3.42772	1.00014		-3.42772	0.999126		-3.42772	1.00145		-3.42772	1.00065		-3.42772	0.998775
-3.3532	1.00072		-3.3532	0.99956		-3.3532	1.00078		-3.3532	1.00028		-3.3532	0.999921		-3.3532	1.00045		-3.3532	0.9996		-3.3532	1.00121		-3.3532	0.999089		-3.3532	1.00036		-3.3532	1.00079		-3.3532	1.00065		-3.3532	0.999234		-3.3532	0.999847		-3.3532	1.00037		-3.3532	0.999253		-3.3532	0.998751
-3.27869	1.00116		-3.27869	0.9989		-3.27869	1.00045		-3.27869	1.00069		-3.27869	1.00131		-3.27869	1.00063		-3.27869	1.00076		-3.27869	1.00073		-3.27869	0.99857		-3.27869	0.999539		-3.27869	1.00125		-3.27869	0.999424		-3.27869	0.999398		-3.27869	0.999607		-3.27869	1.00039		-3.27869	0.999573		-3.27869	0.999818
-3.20417	0.999912		-3.20417	0.999797		-3.20417	0.999162		-3.20417	1.00038		-3.20417	1.00158		-3.20417	1.00003		-3.20417	1.0014		-3.20417	1.00035		-3.20417	0.999272		-3.20417	0.999336		-3.20417	1.0013		-3.20417	0.99901		-3.20417	0.99962		-3.20417	0.999863		-3.20417	1.00128		-3.20417	0.999557		-3.20417	1.00079
-3.12966	0.998776		-3.12966	1.00005		-3.12966	1.00012		-3.12966	0.999577		-3.12966	1.00153		-3.12966	0.999574		-3.12966	1.00038		-3.12966	1.00075		-3.12966	0.999597		-3.12966	0.999807		-3.12966	1.00032		-3.12966	1.00007		-3.12966	1.00076		-3.12966	1.00086		-3.12966	1.00114		-3.12966	0.999552		-3.12966	1.00089
-3.05514	0.999852		-3.05514	0.998925		-3.05514	0.998283		-3.05514	0.99923		-3.05514	1.00011		-3.05514	0.998924		-3.05514	0.99993		-3.05514	1.00095		-3.05514	0.999579		-3.05514	0.998833		-3.05514	1.00059		-3.05514	1.00105		-3.05514	1.00058		-3.05514	1.00199		-3.05514	1.00165		-3.05514	1.00028		-3.05514	1.00075
-2.98062	1.00038		-2.98062	0.999608		-2.98062	0.998454		-2.98062	0.999295		-2.98062	0.999993		-2.98062	0.998601		-2.98062	1.00082		-2.98062	1.00091		-2.98062	1.0002		-2.98062	1.00065		-2.98062	1.00094		-2.98062	1.00148		-2.98062	0.999485		-2.98062	1.0019		-2.98062	0.99954		-2.98062	1.00123		-2.98062	1.00036
-2.90611	1.00022		-2.90611	0.999478		-2.90611	0.998419		-2.90611	0.99806		-2.90611	1.00025		-2.90611	0.998791		-2.90611	1.00226		-2.90611	0.999591		-2.90611	1.00009		-2.90611	0.999802		-2.90611	1.0013		-2.90611	1.00044		-2.90611	0.999124		-2.90611	1.00175		-2.90611	0.999132		-2.90611	1.00026		-2.90611	1.00097
-2.83159	1.00006		-2.83159	1.0007		-2.83159	0.998372		-2.83159	0.998698		-2.83159	0.998934		-2.83159	1.00013		-2.83159	1.00106		-2.83159	0.999845		-2.83159	0.999729		-2.83159	1.00011		-2.83159	1.00083		-2.83159	0.999494		-2.83159	0.999806		-2.83159	0.999931		-2.83159	0.998196		-2.83159	0.998658		-2.83159	1.0003
-2.75708	0.998927		-2.75708	1.00051		-2.75708	0.999345		-2.75708	0.99894		-2.75708	1.00018		-2.75708	0.999971		-2.75708	1.00121		-2.75708	1.00005		-2.75708	1.00091		-2.75708	1.00025		-2.75708	0.99993		-2.75708	1.00001		-2.75708	1.00014		-2.75708	1.00028		-2.75708	0.998263		-2.75708	0.998389		-2.75708	0.999434
-2.68256	0.999937		-2.68256	1.00166		-2.68256	0.999223		-2.68256	0.998758		-2.68256	0.99884		-2.68256	0.999565		-2.68256	0.999879		-2.68256	0.99997		-2.68256	1.00197		-2.68256	1.00114		-2.68256	1.00035		-2.68256	1.00053		-2.68256	1.00113		-2.68256	1.00024		-2.68256	0.997812		-2.68256	0.998729		-2.68256	1.00099
-2.60805	0.999825		-2.60805	1.00127		-2.60805	1.00031		-2.60805	0.999667		-2.60805	0.999318		-2.60805	0.999759		-2.60805	1.0002		-2.60805	1.0002		-2.60805	1.00174		-2.60805	1.0005		-2.60805	0.999798		-2.60805	1.00119		-2.60805	0.999727		-2.60805	1.00142		-2.60805	0.997746		-2.60805	0.999506		-2.60805	1.00066
-2.53353	1.00039		-2.53353	0.999459		-2.53353	1.00072		-2.53353	0.999155		-2.53353	0.998563		-2.53353	1.00082		-2.53353	0.999542		-2.53353	1.00004		-2.53353	1.00003		-2.53353	1.00191		-2.53353	0.999291		-2.53353	1.00069		-2.53353	1.00138		-2.53353	1.00176		-2.53353	0.998132		-2.53353	1.00114		-2.53353	1.00004
-2.45901	1.00064		-2.45901	0.999969		-2.45901	0.999855		-2.45901	1.00026		-2.45901	0.999162		-2.45901	1.00016		-2.45901	0.998982		-2.45901	1.00082		-2.45901	1.00014		-2.45901	1.00113		-2.45901	0.99852		-2.45901	0.999885		-2.45901	1.00122		-2.45901	1.00041		-2.45901	0.997948		-2.45901	1.0002		-2.45901	0.999663
-2.3845	1.0004		-2.3845	0.999627		-2.3845	0.999561		-2.3845	0.999292		-2.3845	0.999316		-2.3845	1.00112		-2.3845	0.998515		-2.3845	0.999903		-2.3845	0.999679		-2.3845	1.00204		-2.3845	1.00004		-2.3845	0.999192		-2.3845	1.0003		-2.3845	1.00052		-2.3845	0.99849		-2.3845	0.999137		-2.3845	1.00091
-2.30998	0.999852		-2.30998	1.00079		-2.30998	0.998623		-2.30998	0.999564		-2.30998	1.00043		-2.30998	1.00101		-2.30998	0.999282		-2.30998	1.00139		-2.30998	0.999123		-2.30998	1.00102		-2.30998	0.999841		-2.30998	0.999088		-2.30998	0.999792		-2.30998	0.999989		-2.30998	0.998742		-2.30998	0.999655		-2.30998	1.00009
-2.23547	0.999283		-2.23547	0.999757		-2.23547	0.998835		-2.23547	0.999859		-2.23547	1.0015		-2.23547	1.00261		-2.23547	1.00031		-2.23547	0.999322		-2.23547	0.998804		-2.23547	1.00145		-2.23547	0.999259		-2.23547	0.999114		-2.23547	0.99979		-2.23547	1.00075		-2.23547	0.999166		-2.23547	0.999645		-2.23547	1.00004
-2.16095	0.997913		-2.16095	0.999932		-2.16095	0.999133		-2.16095	0.999596		-2.16095	1.00145		-2.16095	1.00189		-2.16095	1.00029		-2.16095	0.998805		-2.16095	0.99926		-2.16095	1.00154		-2.16095	0.999953		-2.16095	0.999392		-2.16095	0.999984		-2.16095	0.999278		-2.16095	0.999717		-2.16095	0.999976		-2.16095	0.999682
-2.08644	0.997534		-2.08644	1.00085		-2.08644	0.999406		-2.08644	0.9998		-2.08644	1.00117		-2.08644	1.00193		-2.08644	1.00057		-2.08644	0.998951		-2.08644	1.00038		-2.08644	1.00163		-2.08644	1.00099		-2.08644	0.999542		-2.08644	1.00045		-2.08644	0.999971		-2.08644	1.00029		-2.08644	0.999119		-2.08644	1.00054
-2.01192	0.997866		-2.01192	1.00157		-2.01192	0.999211		-2.01192	0.999814		-2.01192	1.00171		-2.01192	1.00143		-2.01192	1.00064		-2.01192	0.999495		-2.01192	1.00058		-2.01192	1.00117		-2.01192	0.999178		-2.01192	0.999398		-2.01192	1.00038		-2.01192	1.00026		-2.01192	0.999603		-2.01192	1.00014		-2.01192	0.999974
-1.93741	0.99825		-1.93741	1.00037		-1.93741	1.00045		-1.93741	0.999112		-1.93741	1.00116		-1.93741	1.00126		-1.93741	1.00024		-1.93741	0.999021		-1.93741	0.999525		-1.93741	1.00083		-1.93741	0.999151		-1.93741	0.999707		-1.93741	1.00106		-1.93741	1.00058		-1.93741	0.999985		-1.93741	0.999951		-1.93741	0.999466
-1.86289	0.998885		-1.86289	0.999597		-1.86289	0.999704		-1.86289	0.999747		-1.86289	1.00041		-1.86289	1.00029		-1.86289	0.999604		-1.86289	0.999136		-1.86289	0.999389		-1.86289	1.00189		-1.86289	0.999005		-1.86289	0.999919		-1.86289	1.00028		-1.86289	0.999898		-1.86289	0.999624		-1.86289	1.00055		-1.86289	1.0002
-1.78837	0.997446		-1.78837	0.999834		-1.78837	0.999788		-1.78837	0.99981		-1.78837	1.0017		-1.78837	1.00015		-1.78837	0.999226		-1.78837	0.998523		-1.78837	1.00078		-1.78837	1.00058		-1.78837	0.999601		-1.78837	0.999407		-1.78837	1.00083		-1.78837	1.0005		-1.78837	1.0007		-1.78837	1.00076		-1.78837	1.0006
-1.71386	0.999273		-1.71386	0.999116		-1.71386	1.00065		-1.71386	0.998911		-1.71386	1.0025		-1.71386	1.0003		-1.71386	0.998815		-1.71386	0.999025		-1.71386	1.00204		-1.71386	1.0006		-1.71386	0.999413		-1.71386	0.998929		-1.71386	1.0015		-1.71386	1.00045		-1.71386	1.0003		-1.71386	1.00153		-1.71386	1.0009
-1.63934	1.00003		-1.63934	0.999814		-1.63934	0.999478		-1.63934	1.00077		-1.63934	1.00133		-1.63934	0.998892		-1.63934	1.00047		-1.63934	0.99779		-1.63934	1.00172		-1.63934	1.00177		-1.63934	1.00017		-1.63934	1		-1.63934	1.00154		-1.63934	0.999984		-1.63934	0.999349		-1.63934	0.999158		-1.63934	1.0013
-1.56483	1.00031		-1.56483	1.00066		-1.56483	0.999727		-1.56483	1.00096		-1.56483	1.00209		-1.56483	0.999734		-1.56483	1.00002		-1.56483	0.997336		-1.56483	1.00163		-1.56483	1.00093		-1.56483	1.00059		-1.56483	0.999825		-1.56483	1.00043		-1.56483	0.999607		-1.56483	0.99972		-1.56483	0.998361		-1.56483	1.00138
-1.49031	0.999955		-1.49031	1.00064		-1.49031	0.998965		-1.49031	1.0007		-1.49031	1.00232		-1.49031	1.00002		-1.49031	1.00088		-1.49031	0.998114		-1.49031	1.00273		-1.49031	1.00163		-1.49031	0.999913		-1.49031	0.999475		-1.49031	1.00089		-1.49031	0.99969		-1.49031	0.999831		-1.49031	0.998694		-1.49031	0.999848
-1.4158	1.00004		-1.4158	1.00083		-1.4158	0.998937		-1.4158	1.00141		-1.4158	1.00349		-1.4158	1.00002		-1.4158	1.0008		-1.4158	0.997663		-1.4158	1.00235		-1.4158	1.00203		-1.4158	0.998872		-1.4158	0.999522		-1.4158	1.00171		-1.4158	1.00017		-1.4158	0.999858		-1.4158	0.998156		-1.4158	1.00156
-1.34128	0.99982		-1.34128	0.999332		-1.34128	0.998685		-1.34128	1.00167		-1.34128	1.00326		-1.34128	1.00062		-1.34128	1.00182		-1.34128	0.998131		-1.34128	1.00188		-1.34128	1.00196		-1.34128	0.999251		-1.34128	1.00027		-1.34128	1.00161		-1.34128	1.0002		-1.34128	1.00006		-1.34128	0.998305		-1.34128	1.00101
-1.26677	1.0002		-1.26677	0.999596		-1.26677	0.998354		-1.26677	1.00116		-1.26677	1.00306		-1.26677	1.00017		-1.26677	1.0022		-1.26677	0.999064		-1.26677	1.00032		-1.26677	1.00072		-1.26677	1.00033		-1.26677	1.00133		-1.26677	1.00162		-1.26677	1.00038		-1.26677	1.00086		-1.26677	0.997185		-1.26677	1.0005
-1.19225	0.999824		-1.19225	1.0007		-1.19225	0.999076		-1.19225	1.00152		-1.19225	1.00162		-1.19225	1.00035		-1.19225	1.00199		-1.19225	0.997751		-1.19225	1.0014		-1.19225	0.999941		-1.19225	1.00122		-1.19225	1.00094		-1.19225	1.00051		-1.19225	1.00177		-1.19225	1.0008		-1.19225	0.997627		-1.19225	0.999229
-1.11773	0.998624		-1.11773	0.998496		-1.11773	0.999076		-1.11773	1.00055		-1.11773	1.00202		-1.11773	0.999646		-1.11773	1.00146		-1.11773	0.9986		-1.11773	1.00275		-1.11773	0.999552		-1.11773	1.0011		-1.11773	1.00176		-1.11773	1.00013		-1.11773	1.00145		-1.11773	1.00073		-1.11773	0.998913		-1.11773	0.999616
-1.04322	0.997902		-1.04322	1.00001		-1.04322	0.999239		-1.04322	1.00002		-1.04322	1.00126		-1.04322	0.999394		-1.04322	1.00151		-1.04322	0.998954		-1.04322	1.00233		-1.04322	0.999026		-1.04322	1.00203		-1.04322	1.00183		-1.04322	0.999904		-1.04322	1.00058		-1.04322	1.00036		-1.04322	0.99864		-1.04322	0.999347
-0.968703	0.998622		-0.968703	0.998696		-0.968703	0.999295		-0.968703	0.99828		-0.968703	1.00092		-0.968703	0.999098		-0.968703	1.00053		-0.968703	0.999575		-0.968703	1.00271		-0.968703	1.00033		-0.968703	1.00203		-0.968703	1.00252		-0.968703	0.999554		-0.968703	1.00161		-0.968703	1.00053		-0.968703	0.999779		-0.968703	1.00017
-0.894187	0.997466		-0.894187	0.999563		-0.894187	0.999713		-0.894187	0.998813		-0.894187	1.00224		-0.894187	0.998422		-0.894187	1.00041		-0.894187	0.999268		-0.894187	1.0008		-0.894187	1.00036		-0.894187	1.00139		-0.894187	1.00195		-0.894187	1.00014		-0.894187	1.00224		-0.894187	1.00067		-0.894187	0.999618		-0.894187	1.00078
-0.819672	0.997915		-0.819672	0.998597		-0.819672	0.997459		-0.819672	0.997196		-0.819672	1.00196		-0.819672	0.999594		-0.819672	0.999898		-0.819672	1.00007		-0.819672	1.00016		-0.819672	0.999108		-0.819672	1.00118		-0.819672	1.00083		-0.819672	1.00077		-0.819672	1.00152		-0.819672	0.999018		-0.819672	1.00071		-0.819672	0.998927
-0.745156	0.997067		-0.745156	0.997871		-0.745156	0.997864		-0.745156	0.997411		-0.745156	1.00172		-0.745156	1.00013		-0.745156	1.0008		-0.745156	0.998673		-0.745156	1.00066		-0.745156	0.999988		-0.745156	1.00116		-0.745156	1.002		-0.745156	1.00008		-0.745156	1.00029		-0.745156	0.999077		-0.745156	1.00032		-0.745156	0.998756
-0.67064	0.996819		-0.67064	0.998315		-0.67064	0.997704		-0.67064	0.997532		-0.67064	1.00258		-0.67064	1.00108		-0.67064	1.00012		-0.67064	0.998802		-0.67064	1.00068		-0.67064	1.00102		-0.67064	1.00099		-0.67064	1.00051		-0.67064	0.999922		-0.67064	0.999486		-0.67064	0.998832		-0.67064	0.999454		-0.67064	0.999199
-0.596125	0.997115		-0.596125	0.998637		-0.596125	0.997518		-0.596125	0.997951		-0.596125	1.00125		-0.596125	0.999888		-0.596125	1.00158		-0.596125	0.997949		-0.596125	1.0004		-0.596125	1.00102		-0.596125	1.00128		-0.596125	0.99989		-0.596125	1.00103		-0.596125	0.999972		-0.596125	0.999664		-0.596125	0.998767		-0.596125	0.999836
-0.521609	0.997981		-0.521609	0.997383		-0.521609	0.997055		-0.521609	0.998351		-0.521609	1.0008		-0.521609	0.998746		-0.521609	1.00223		-0.521609	0.999705		-0.521609	1.00022		-0.521609	1.00135		-0.521609	1.00098		-0.521609	0.9989		-0.521609	1.00063		-0.521609	0.999566		-0.521609	1.00017		-0.521609	0.998847		-0.521609	0.99968
-0.447094	0.999743		-0.447094	0.999637		-0.447094	0.997146		-0.447094	0.999436		-0.447094	1.00167		-0.447094	0.999489		-0.447094	1.00222		-0.447094	1.00007		-0.447094	1.00031		-0.447094	1.00077		-0.447094	1.00096		-0.447094	0.999465		-0.447094	1.00001		-0.447094	0.999389		-0.447094	0.998403		-0.447094	0.998649		-0.447094	1.00018
-0.372578	0.999659		-0.372578	1.00107		-0.372578	0.997992		-0.372578	0.999138		-0.372578	1.00291		-0.372578	1.00045		-0.372578	1.00187		-0.372578	1.00087		-0.372578	0.999725		-0.372578	1.00149		-0.372578	1.00069		-0.372578	0.999513		-0.372578	1.00048		-0.372578	1.00064		-0.372578	0.999008		-0.372578	0.997817		-0.372578	1.00117
-0.298063	0.999201		-0.298063	1.00067		-0.298063	0.997765		-0.298063	0.998404		-0.298063	1.00326		-0.298063	1.00072		-0.298063	1.00239		-0.298063	0.999942		-0.298063	1.00125		-0.298063	1.00097		-0.298063	0.999051		-0.298063	0.999715		-0.298063	1.00131		-0.298063	0.999916		-0.298063	0.999677		-0.298063	0.997662		-0.298063	1.00065
-0.223547	0.998972		-0.223547	1.00047		-0.223547	0.997917		-0.223547	0.997346		-0.223547	1.00256		-0.223547	1.0011		-0.223547	1.00148		-0.223547	0.999558		-0.223547	1.00044		-0.223547	1.00165		-0.223547	0.998543		-0.223547	1.00006		-0.223547	0.99997		-0.223547	1.00062		-0.223547	0.998311		-0.223547	0.998825		-0.223547	1.00106
-0.149031	0.998652		-0.149031	1.00108		-0.149031	0.998382		-0.149031	0.998438		-0.149031	1.00179		-0.149031	1.00122		-0.149031	1.00229		-0.149031	0.9992		-0.149031	0.999946		-0.149031	1.00194		-0.149031	1.00049		-0.149031	1.00035		-0.149031	0.998547		-0.149031	1.0009		-0.149031	0.998029		-0.149031	0.998698		-0.149031	1.001
-0.0745156	0.999282		-0.0745156	1.00044		-0.0745156	0.99951		-0.0745156	0.997923		-0.0745156	1.0022		-0.0745156	1.00082		-0.0745156	1.00271		-0.0745156	0.9991		-0.0745156	0.999753		-0.0745156	1.00298		-0.0745156	1.00028		-0.0745156	1.00084		-0.0745156	1.00023		-0.0745156	1.00089		-0.0745156	0.998252		-0.0745156	0.999661		-0.0745156	1.00085
0	0.998539		0	0.99807		0	0.998225		0	0.996927		0	1.00127		0	1.00029		0	1.00107		0	0.998375		0	0.999085		0	1.00061		0	0.998886		0	1.0001		0	0.998905		0	1.00003		0	0.9987		0	0.998573		0	1.00003
0.0745156	0.992678		0.0745156	0.99392		0.0745156	0.993113		0.0745156	0.993148		0.0745156	0.997103		0.0745156	0.99514		0.0745156	0.996697		0.0745156	0.994772		0.0745156	0.99597		0.0745156	0.996349		0.0745156	0.994624		0.0745156	0.99518		0.0745156	0.995062		0.0745156	0.9941		0.0745156	0.99438		0.0745156	0.992644		0.0745156	0.995132
0.149031	0.990817		0.149031	0.992669		0.149031	0.990004		0.149031	0.99148		0.149031	0.995268		0.149031	0.994577		0.149031	0.992379		0.149031	0.992139		0.149031	0.993914		0.149031	0.994377		0.149031	0.992225		0.149031	0.994342		0.149031	0.993879		0.149031	0.992505		0.149031	0.992994		0.149031	0.990788		0.149031	0.992673
0.223547	0.989958		0.223547	0.991202		0.223547	0.988532		0.223547	0.989857		0.223547	0.992775		0.223547	0.99293		0.223547	0.991108		0.223547	0.990358		0.223547	0.992995		0.223547	0.992651		0.223547	0.990271		0.223547	0.993324		0.223547	0.992796		0.223547	0.991841		0.223547	0.991426		0.223547	0.988859		0.223547	0.990807
0.298062	0.989196		0.298062	0.988985		0.298062	0.988937		0.298062	0.988266		0.298062	0.992576		0.298062	0.992022		0.298062	0.990917		0.298062	0.990022		0.298062	0.992909		0.298062	0.992648		0.298062	0.988797		0.298062	0.991636		0.298062	0.991629		0.298062	0.990652		0.298062	0.990098		0.298062	0.98786		0.298062	0.989474
0.372578	0.987738		0.372578	0.987047		0.372578	0.988482		0.372578	0.988791		0.372578	0.991925		0.372578	0.990087		0.372578	0.99025		0.372578	0.989281		0.372578	0.991877		0.372578	0.991884		0.372578	0.988137		0.372578	0.990846		0.372578	0.990562		0.372578	0.989016		0.372578	0.989663		0.372578	0.98821		0.372578	0.988021
0.447093	0.987149		0.447093	0.986979		0.447093	0.987924		0.447093	0.987234		0.447093	0.990314		0.447093	0.988693		0.447093	0.990982		0.447093	0.988863		0.447093	0.990933		0.447093	0.991026		0.447093	0.988372		0.447093	0.989704		0.447093	0.990264		0.447093	0.986704		0.447093	0.988707		0.447093	0.98723		0.447093	0.986558
0.521609	0.986011		0.521609	0.985723		0.521609	0.986855		0.521609	0.987092		0.521609	0.989138		0.521609	0.987579		0.521609	0.990306		0.521609	0.987295		0.521609	0.989281		0.521609	0.990786		0.521609	0.988013		0.521609	0.989256		0.521609	0.988552		0.521609	0.985674		0.521609	0.987875		0.521609	0.985568		0.521609	0.985835
0.596125	0.985064		0.596125	0.98472		0.596125	0.985073		0.596125	0.985719		0.596125	0.988206		0.596125	0.986648		0.596125	0.988097		0.596125	0.986406		0.596125	0.988083		0.596125	0.988165		0.596125	0.988933		0.596125	0.987573		0.596125	0.988416		0.596125	0.984679		0.596125	0.98535		0.596125	0.983455		0.596125	0.986778
0.67064	0.984895		0.67064	0.982911		0.67064	0.984602		0.67064	0.984404		0.67064	0.986226		0.67064	0.987144		0.67064	0.987453		0.67064	0.986499		0.67064	0.988177		0.67064	0.987961		0.67064	0.98821		0.67064	0.986292		0.67064	0.987387		0.67064	0.983583		0.67064	0.984211		0.67064	0.98317		0.67064	0.985698
0.745156	0.984389		0.745156	0.983769		0.745156	0.983959		0.745156	0.985287		0.745156	0.985795		0.745156	0.986645		0.745156	0.987589		0.745156	0.986605		0.745156	0.987731		0.745156	0.988016		0.745156	0.98835		0.745156	0.986439		0.745156	0.987139		0.745156	0.983027		0.745156	0.984261		0.745156	0.982885		0.745156	0.985763
0.819672	0.982939		0.819672	0.983187		0.819672	0.984358		0.819672	0.985702		0.819672	0.984712		0.819672	0.986683		0.819672	0.988332		0.819672	0.985727		0.819672	0.98692		0.819672	0.98835		0.819672	0.98771		0.819672	0.98704		0.819672	0.98657		0.819672	0.982938		0.819672	0.984696		0.819672	0.982855		0.819672	0.98543
0.894187	0.982092		0.894187	0.982945		0.894187	0.984909		0.894187	0.985495		0.894187	0.986801		0.894187	0.987319		0.894187	0.988162		0.894187	0.986141		0.894187	0.986185		0.894187	0.988456		0.894187	0.986979		0.894187	0.987628		0.894187	0.985724		0.894187	0.982691		0.894187	0.983024		0.894187	0.983407		0.894187	0.985672
0.968703	0.980891		0.968703	0.982792		0.968703	0.983332		0.968703	0.985298		0.968703	0.98681		0.968703	0.986482		0.968703	0.987615		0.968703	0.984092		0.968703	0.985568		0.968703	0.987451		0.968703	0.986331		0.968703	0.986827		0.968703	0.985092		0.968703	0.982766		0.968703	0.981768		0.968703	0.983709		0.968703	0.985439
1.04322	0.981127		1.04322	0.981457		1.04322	0.981377		1.04322	0.985454		1.04322	0.985496		1.04322	0.984085		1.04322	0.987267		1.04322	0.984203		1.04322	0.985667		1.04322	0.985716		1.04322	0.984486		1.04322	0.986235		1.04322	0.985502		1.04322	0.982245		1.04322	0.981502		1.04322	0.983318		1.04322	0.985288
1.11773	0.98075		1.11773	0.980508		1.11773	0.98028		1.11773	0.985145		1.11773	0.984063		1.11773	0.983891		1.11773	0.987623		1.11773	0.982314		1.11773	0.984678		1.11773	0.986387		1.11773	0.983969		1.11773	0.986093		1.11773	0.987239		1.11773	0.982761		1.11773	0.981378		1.11773	0.983539		1.11773	0.984347
1.19225	0.979592		1.19225	0.979667		1.19225	0.980402		1.19225	0.983122		1.19225	0.984542		1.19225	0.984318		1.19225	0.986065		1.19225	0.982279		1.19225	0.98453		1.19225	0.986206		1.19225	0.983525		1.19225	0.985349		1.19225	0.986642		1.19225	0.981839		1.19225	0.979595		1.19225	0.982477		1.19225	0.982876
1.26677	0.97844		1.26677	0.979198		1.26677	0.980461		1.26677	0.982492		1.26677	0.984703		1.26677	0.984149		1.26677	0.985312		1.26677	0.98292		1.26677	0.985107		1.26677	0.984328		1.26677	0.983371		1.26677	0.985006		1.26677	0.985539		1.26677	0.980349		1.26677	0.979356		1.26677	0.982507		1.26677	0.981542
1.34128	0.977745		1.34128	0.980299		1.34128	0.9786		1.34128	0.981818		1.34128	0.98438		1.34128	0.983632		1.34128	0.984949		1.34128	0.983273		1.34128	0.985381		1.34128	0.984994		1.34128	0.982757		1.34128	0.984416		1.34128	0.983992		1.34128	0.979492		1.34128	0.979772		1.34128	0.980855		1.34128	0.980619
1.4158	0.978572		1.4158	0.980994		1.4158	0.978215		1.4158	0.982082		1.4158	0.984746		1.4158	0.98358		1.4158	0.983956		1.4158	0.983461		1.4158	0.984265		1.4158	0.984859		1.4158	0.983481		1.4158	0.983066		1.4158	0.983794		1.4158	0.980486		1.4158	0.978152		1.4158	0.981218		1.4158	0.979337
1.49031	0.978398		1.49031	0.979668		1.49031	0.977753		1.49031	0.981477		1.49031	0.983212		1.49031	0.984546		1.49031	0.982934		1.49031	0.982045		1.49031	0.983283		1.49031	0.984489		1.49031	0.983798		1.49031	0.983731		1.49031	0.983466		1.49031	0.980897		1.49031	0.977649		1.49031	0.98126		1.49031	0.979175
1.56483	0.978592		1.56483	0.980192		1.56483	0.977159		1.56483	0.981331		1.56483	0.983325		1.56483	0.983438		1.56483	0.982375		1.56483	0.981939		1.56483	0.984079		1.56483	0.984916		1.56483	0.983284		1.56483	0.98405		1.56483	0.983387		1.56483	0.979895		1.56483	0.976791		1.56483	0.980702		1.56483	0.977844
1.63934	0.978088		1.63934	0.980288		1.63934	0.976675		1.63934	0.982408		1.63934	0.983359		1.63934	0.984457		1.63934	0.981199		1.63934	0.981523		1.63934	0.982269		1.63934	0.98436		1.63934	0.981614		1.63934	0.984528		1.63934	0.982852		1.63934	0.979135		1.63934	0.976836		1.63934	0.97898		1.63934	0.978328
1.71386	0.977908		1.71386	0.980285		1.71386	0.977616		1.71386	0.981809		1.71386	0.983244		1.71386	0.982616		1.71386	0.980977		1.71386	0.980515		1.71386	0.981408		1.71386	0.984385		1.71386	0.981296		1.71386	0.9828		1.71386	0.982755		1.71386	0.979118		1.71386	0.975466		1.71386	0.978592		1.71386	0.978316
1.78837	0.978414		1.78837	0.979929		1.78837	0.976378		1.78837	0.980637		1.78837	0.982765		1.78837	0.981364		1.78837	0.980771		1.78837	0.981014		1.78837	0.981108		1.78837	0.984458		1.78837	0.981984		1.78837	0.982437		1.78837	0.982029		1.78837	0.978063		1.78837	0.975924		1.78837	0.977119		1.78837	0.9775
1.86289	0.978568		1.86289	0.978937		1.86289	0.976273		1.86289	0.978626		1.86289	0.981527		1.86289	0.982097		1.86289	0.979792		1.86289	0.980214		1.86289	0.981289		1.86289	0.983717		1.86289	0.981592		1.86289	0.98205		1.86289	0.98201		1.86289	0.977859		1.86289	0.976425		1.86289	0.977214		1.86289	0.977121
1.93741	0.977571		1.93741	0.978409		1.93741	0.975896		1.93741	0.978958		1.93741	0.981437		1.93741	0.981599		1.93741	0.980314		1.93741	0.97969		1.93741	0.981601		1.93741	0.98212		1.93741	0.981508		1.93741	0.981872		1.93741	0.982636		1.93741	0.978363		1.93741	0.977271		1.93741	0.977655		1.93741	0.978834
2.01192	0.97702		2.01192	0.97659		2.01192	0.974839		2.01192	0.978198		2.01192	0.980752		2.01192	0.981676		2.01192	0.97988		2.01192	0.980777		2.01192	0.980134		2.01192	0.981726		2.01192	0.981983		2.01192	0.981271		2.01192	0.982343		2.01192	0.97718		2.01192	0.975391		2.01192	0.977324		2.01192	0.978258
2.08644	0.976179		2.08644	0.976529		2.08644	0.975028		2.08644	0.977297		2.08644	0.98059		2.08644	0.980727		2.08644	0.979323		2.08644	0.980266		2.08644	0.980715		2.08644	0.982946		2.08644	0.981604		2.08644	0.980722		2.08644	0.983051		2.08644	0.978065		2.08644	0.975167		2.08644	0.976604		2.08644	0.978733
2.16095	0.97457		2.16095	0.97584		2.16095	0.974739		2.16095	0.978277		2.16095	0.979271		2.16095	0.98011		2.16095	0.979093		2.16095	0.980562		2.16095	0.981317		2.16095	0.981253		2.16095	0.980461		2.16095	0.981156		2.16095	0.982418		2.16095	0.97742		2.16095	0.974384		2.16095	0.976685		2.16095	0.978784
2.23547	0.974655		2.23547	0.97514		2.23547	0.974814		2.23547	0.977917		2.23547	0.980309		2.23547	0.978876		2.23547	0.977529		2.23547	0.980705		2.23547	0.980926		2.23547	0.980524		2.23547	0.981671		2.23547	0.980963		2.23547	0.982574		2.23547	0.975679		2.23547	0.974103		2.23547	0.976107		2.23547	0.978631
2.30998	0.973091		2.30998	0.974594		2.30998	0.974734		2.30998	0.978714		2.30998	0.981582		2.30998	0.97856		2.30998	0.978419		2.30998	0.980608		2.30998	0.981611		2.30998	0.981044		2.30998	0.980895		2.30998	0.981879		2.30998	0.981575		2.30998	0.975492		2.30998	0.974766		2.30998	0.97493		2.30998	0.978142
2.3845	0.97238		2.3845	0.974468		2.3845	0.975147		2.3845	0.976298		2.3845	0.980837		2.3845	0.979618		2.3845	0.978884		2.3845	0.979914		2.3845	0.980431		2.3845	0.980589		2.3845	0.981229		2.3845	0.982362		2.3845	0.981066		2.3845	0.973522		2.3845	0.974671		2.3845	0.976276		2.3845	0.976866
2.45901	0.972948		2.45901	0.973503		2.45901	0.974869		2.45901	0.975246		2.45901	0.980801		2.45901	0.979453		2.45901	0.979099		2.45901	0.978665		2.45901	0.980485		2.45901	0.979893		2.45901	0.979788		2.45901	0.98241		2.45901	0.981273		2.45901	0.973608		2.45901	0.973185		2.45901	0.975628		2.45901	0.97647
2.53353	0.973933		2.53353	0.973729		2.53353	0.974726		2.53353	0.97481		2.53353	0.978383		2.53353	0.978331		2.53353	0.978736		2.53353	0.977343		2.53353	0.97979		2.53353	0.979219		2.53353	0.980313		2.53353	0.982293		2.53353	0.981361		2.53353	0.97359		2.53353	0.972272		2.53353	0.975522		2.53353	0.976262
2.60805	0.974047		2.60805	0.972999		2.60805	0.975609		2.60805	0.975036		2.60805	0.979663		2.60805	0.978221		2.60805	0.977931		2.60805	0.976059		2.60805	0.978705		2.60805	0.978971		2.60805	0.979523		2.60805	0.981291		2.60805	0.98069		2.60805	0.973919		2.60805	0.973184		2.60805	0.974827		2.60805	0.974882
2.68256	0.973235		2.68256	0.972968		2.68256	0.974362		2.68256	0.975426		2.68256	0.979467		2.68256	0.976211		2.68256	0.97672		2.68256	0.976201		2.68256	0.979187		2.68256	0.979482		2.68256	0.979397		2.68256	0.979634		2.68256	0.981307		2.68256	0.975047		2.68256	0.972752		2.68256	0.972101		2.68256	0.97406
2.75708	0.972949		2.75708	0.972107		2.75708	0.972606		2.75708	0.976102		2.75708	0.977909		2.75708	0.974802		2.75708	0.977054		2.75708	0.975971		2.75708	0.97931		2.75708	0.978225		2.75708	0.978979		2.75708	0.980022		2.75708	0.980197		2.75708	0.974564		2.75708	0.974043		2.75708	0.971987		2.75708	0.974205
2.83159	0.97317		2.83159	0.971856		2.83159	0.973151		2.83159	0.975769		2.83159	0.977947		2.83159	0.975921		2.83159	0.977178		2.83159	0.976672		2.83159	0.978567		2.83159	0.978307		2.83159	0.977535		2.83159	0.979534		2.83159	0.980192		2.83159	0.973861		2.83159	0.973219		2.83159	0.973186		2.83159	0.973812
2.90611	0.97227		2.90611	0.971365		2.90611	0.973529		2.90611	0.975063		2.90611	0.977326		2.90611	0.976433		2.90611	0.978477		2.90611	0.975762		2.90611	0.978451		2.90611	0.978158		2.90611	0.978636		2.90611	0.979879		2.90611	0.979341		2.90611	0.973313		2.90611	0.972856		2.90611	0.972095		2.90611	0.974694
2.98062	0.973449		2.98062	0.970332		2.98062	0.973817		2.98062	0.975005		2.98062	0.976429		2.98062	0.97593		2.98062	0.977198		2.98062	0.975077		2.98062	0.978503		2.98062	0.977618		2.98062	0.979465		2.98062	0.979088		2.98062	0.977991		2.98062	0.973313		2.98062	0.972646		2.98062	0.972249		2.98062	0.973349
3.05514	0.972988		3.05514	0.971185		3.05514	0.973406		3.05514	0.975294		3.05514	0.975783		3.05514	0.975481		3.05514	0.976569		3.05514	0.975688		3.05514	0.978657		3.05514	0.978528		3.05514	0.978638		3.05514	0.979522		3.05514	0.97794		3.05514	0.973077		3.05514	0.972355		3.05514	0.971795		3.05514	0.973331
3.12966	0.972377		3.12966	0.972692		3.12966	0.973664		3.12966	0.974931		3.12966	0.975296		3.12966	0.974732		3.12966	0.977109		3.12966	0.975662		3.12966	0.978027		3.12966	0.978406		3.12966	0.978777		3.12966	0.979469		3.12966	0.97691		3.12966	0.973042		3.12966	0.972034		3.12966	0.97206		3.12966	0.973036
3.20417	0.972268		3.20417	0.970944		3.20417	0.973839		3.20417	0.973487		3.20417	0.975085		3.20417	0.974938		3.20417	0.976772		3.20417	0.976432		3.20417	0.978038		3.20417	0.977806		3.20417	0.977273		3.20417	0.979144		3.20417	0.976028		3.20417	0.971627		3.20417	0.971552		3.20417	0.970703		3.20417	0.973546
3.27869	0.972116		3.27869	0.971816		3.27869	0.973112		3.27869	0.973255		3.27869	0.975695		3.27869	0.975349		3.27869	0.976067		3.27869	0.976151		3.27869	0.978369		3.27869	0.978327		3.27869	0.977769		3.27869	0.979838		3.27869	0.978437		3.27869	0.972057		3.27869	0.972321		3.27869	0.970351		3.27869	0.973153
3.3532	0.971692		3.3532	0.971771		3.3532	0.972287		3.3532	0.972966		3.3532	0.974721		3.3532	0.97559		3.3532	0.977241		3.3532	0.976676		3.3532	0.978419		3.3532	0.977467		3.3532	0.976969		3.3532	0.979154		3.3532	0.977261		3.3532	0.971228		3.3532	0.97131		3.3532	0.970392		3.3532	0.973567
3.42772	0.970199		3.42772	0.972085		3.42772	0.972452		3.42772	0.971965		3.42772	0.975771		3.42772	0.974682		3.42772	0.976558		3.42772	0.976311		3.42772	0.978873		3.42772	0.976974		3.42772	0.976111		3.42772	0.977649		3.42772	0.976075		3.42772	0.97059		3.42772	0.970918		3.42772	0.970421		3.42772	0.974261
3.50223	0.971883		3.50223	0.970349		3.50223	0.973087		3.50223	0.971581		3.50223	0.975875		3.50223	0.9753		3.50223	0.976589		3.50223	0.976313		3.50223	0.976463		3.50223	0.976002		3.50223	0.976924		3.50223	0.978353		3.50223	0.976639		3.50223	0.969731		3.50223	0.970323		3.50223	0.968905		3.50223	0.974435
3.57675	0.970573		3.57675	0.971397		3.57675	0.972747		3.57675	0.972461		3.57675	0.974978		3.57675	0.975477		3.57675	0.977531		3.57675	0.974693		3.57675	0.975831		3.57675	0.975786		3.57675	0.975749		3.57675	0.977681		3.57675	0.976502		3.57675	0.970906		3.57675	0.970293		3.57675	0.970737		3.57675	0.973795
3.65126	0.970029		3.65126	0.972043		3.65126	0.971674		3.65126	0.97269		3.65126	0.975382		3.65126	0.975428		3.65126	0.976935		3.65126	0.974539		3.65126	0.97628		3.65126	0.975697		3.65126	0.974955		3.65126	0.977166		3.65126	0.976037		3.65126	0.971224		3.65126	0.970596		3.65126	0.970457		3.65126	0.973821
3.72578	0.968376		3.72578	0.971741		3.72578	0.971317		3.72578	0.972792		3.72578	0.975705		3.72578	0.975403		3.72578	0.975641		3.72578	0.973783		3.72578	0.976783		3.72578	0.974318		3.72578	0.973827		3.72578	0.97692		3.72578	0.975005		3.72578	0.971227		3.72578	0.970118		3.72578	0.969089		3.72578	0.972443
3.8003	0.969163		3.8003	0.970205		3.8003	0.970605		3.8003	0.972655		3.8003	0.974101		3.8003	0.976104		3.8003	0.974711		3.8003	0.974178		3.8003	0.976877		3.8003	0.974704		3.8003	0.974263		3.8003	0.976679		3.8003	0.974457		3.8003	0.971485		3.8003	0.969928		3.8003	0.968662		3.8003	0.972473
3.87481	0.969251		3.87481	0.969979		3.87481	0.970753		3.87481	0.971902		3.87481	0.975195		3.87481	0.97504		3.87481	0.973381		3.87481	0.975119		3.87481	0.97746		3.87481	0.97479		3.87481	0.975922		3.87481	0.976282		3.87481	0.974074		3.87481	0.970732		3.87481	0.969051		3.87481	0.969359		3.87481	0.972251
3.94933	0.968969		3.94933	0.971095		3.94933	0.970509		3.94933	0.97267		3.94933	0.973816		3.94933	0.973695		3.94933	0.973151		3.94933	0.975166		3.94933	0.975927		3.94933	0.973722		3.94933	0.97488		3.94933	0.977237		3.94933	0.975164		3.94933	0.969152		3.94933	0.969666		3.94933	0.969234		3.94933	0.972565
4.02384	0.969062		4.02384	0.971182		4.02384	0.970393		4.02384	0.971755		4.02384	0.973383		4.02384	0.973296		4.02384	0.972492		4.02384	0.974807		4.02384	0.974575		4.02384	0.973714		4.02384	0.975285		4.02384	0.976889		4.02384	0.976127		4.02384	0.968901		4.02384	0.968851		4.02384	0.968828		4.02384	0.972177
4.09836	0.968283		4.09836	0.971009		4.09836	0.969417		4.09836	0.971433		4.09836	0.971851		4.09836	0.971931		4.09836	0.973405		4.09836	0.974404		4.09836	0.974581		4.09836	0.974965		4.09836	0.974897		4.09836	0.977035		4.09836	0.974622		4.09836	0.967488		4.09836	0.968884		4.09836	0.96789		4.09836	0.9709
4.17287	0.968041		4.17287	0.971018		4.17287	0.969506		4.17287	0.971173		4.17287	0.972624		4.17287	0.972541		4.17287	0.972579		4.17287	0.973863		4.17287	0.973548		4.17287	0.97498		4.17287	0.975343		4.17287	0.976308		4.17287	0.974172		4.17287	0.969416		4.17287	0.969702		4.17287	0.968106		4.17287	0.971118
4.24739	0.96776		4.24739	0.970625		4.24739	0.96904		4.24739	0.971631		4.24739	0.971272		4.24739	0.972778		4.24739	0.971938		4.24739	0.973612		4.24739	0.973373		4.24739	0.974554		4.24739	0.974815		4.24739	0.975994		4.24739	0.974709		4.24739	0.969731		4.24739	0.969175		4.24739	0.968902		4.24739	0.969984
4.3219	0.967406		4.3219	0.97057		4.3219	0.969858		4.3219	0.971174		4.3219	0.971738		4.3219	0.974047		4.3219	0.972158		4.3219	0.973106		4.3219	0.974014		4.3219	0.973649		4.3219	0.973983		4.3219	0.974907		4.3219	0.975108		4.3219	0.969557		4.3219	0.968089		4.3219	0.968969		4.3219	0.970126
4.39642	0.966585		4.39642	0.970109		4.39642	0.969395		4.39642	0.971345		4.39642	0.971768		4.39642	0.973118		4.39642	0.972066		4.39642	0.972957		4.39642	0.974732		4.39642	0.974757		4.39642	0.974167		4.39642	0.974676		4.39642	0.974288		4.39642	0.969566		4.39642	0.966567		4.39642	0.968362		4.39642	0.970578
4.47094	0.967044		4.47094	0.969164		4.47094	0.969004		4.47094	0.970522		4.47094	0.971251		4.47094	0.972111		4.47094	0.972211		4.47094	0.971611		4.47094	0.974705		4.47094	0.975126		4.47094	0.973975		4.47094	0.974507		4.47094	0.97337		4.47094	0.968954		4.47094	0.967174		4.47094	0.967602		4.47094	0.971963
4.54545	0.965672		4.54545	0.967791		4.54545	0.969514		4.54545	0.971567		4.54545	0.970599		4.54545	0.97256		4.54545	0.9719		4.54545	0.971125		4.54545	0.974111		4.54545	0.974074		4.54545	0.974421		4.54545	0.974199		4.54545	0.974651		4.54545	0.968269		4.54545	0.967872		4.54545	0.96836		4.54545	0.971121
4.61997	0.966869		4.61997	0.968625		4.61997	0.967535		4.61997	0.970693		4.61997	0.970985		4.61997	0.972048		4.61997	0.971769		4.61997	0.970163		4.61997	0.974796		4.61997	0.974701		4.61997	0.972883		4.61997	0.973347		4.61997	0.974671		4.61997	0.966608		4.61997	0.967113		4.61997	0.968566		4.61997	0.971134
4.69448	0.967575		4.69448	0.969076		4.69448	0.966895		4.69448	0.971132		4.69448	0.970766		4.69448	0.972697		4.69448	0.973124		4.69448	0.970374		4.69448	0.975088		4.69448	0.9748		4.69448	0.972356		4.69448	0.974092		4.69448	0.973063		4.69448	0.966023		4.69448	0.966838		4.69448	0.968393		4.69448	0.969568
4.769	0.967106		4.769	0.969297		4.769	0.966852		4.769	0.970505		4.769	0.971298		4.769	0.972266		4.769	0.973139		4.769	0.971005		4.769	0.973216		4.769	0.974757		4.769	0.971426		4.769	0.973629		4.769	0.974563		4.769	0.966049		4.769	0.967147		4.769	0.966889		4.769	0.96977
4.84351	0.966894		4.84351	0.969232		4.84351	0.965418		4.84351	0.970132		4.84351	0.970945		4.84351	0.97326		4.84351	0.973762		4.84351	0.971814		4.84351	0.974068		4.84351	0.973811		4.84351	0.971856		4.84351	0.973391		4.84351	0.974235		4.84351	0.966133		4.84351	0.966758		4.84351	0.967107		4.84351	0.968431
4.91803	0.966156		4.91803	0.968446		4.91803	0.965154		4.91803	0.96892		4.91803	0.971361		4.91803	0.972962		4.91803	0.973562		4.91803	0.972207		4.91803	0.972935		4.91803	0.974449		4.91803	0.972274		4.91803	0.973014		4.91803	0.973687		4.91803	0.967988		4.91803	0.965784		4.91803	0.966706		4.91803	0.968301
4.99255	0.966963		4.99255	0.96767		4.99255	0.964884		4.99255	0.969111		4.99255	0.970542		4.99255	0.972712		4.99255	0.972634		4.99255	0.972772		4.99255	0.972353		4.99255	0.974176		4.99255	0.971264		4.99255	0.972726		4.99255	0.972558		4.99255	0.968203		4.99255	0.965203		4.99255	0.965653		4.99255	0.968594
5.06706	0.966883		5.06706	0.966522		5.06706	0.964805		5.06706	0.968607		5.06706	0.970355		5.06706	0.97095		5.06706	0.972907		5.06706	0.97306		5.06706	0.972522		5.06706	0.974259		5.06706	0.971423		5.06706	0.972319		5.06706	0.973233		5.06706	0.966679		5.06706	0.966491		5.06706	0.96479		5.06706	0.967495
5.14158	0.967306		5.14158	0.966381		5.14158	0.963986		5.14158	0.968222		5.14158	0.969765		5.14158	0.971061		5.14158	0.972696		5.14158	0.972664		5.14158	0.971924		5.14158	0.973443		5.14158	0.971339		5.14158	0.971735		5.14158	0.972907		5.14158	0.965747		5.14158	0.965825		5.14158	0.964629		5.14158	0.968044
5.21609	0.967364		5.21609	0.965448		5.21609	0.963972		5.21609	0.969439		5.21609	0.971373		5.21609	0.970616		5.21609	0.971472		5.21609	0.971855		5.21609	0.9727		5.21609	0.973794		5.21609	0.972054		5.21609	0.972152		5.21609	0.973305		5.21609	0.965125		5.21609	0.965194		5.21609	0.965003		5.21609	0.967576
5.29061	0.966982		5.29061	0.965589		5.29061	0.963708		5.29061	0.969427		5.29061	0.971643		5.29061	0.969757		5.29061	0.970245		5.29061	0.969851		5.29061	0.971786		5.29061	0.973056		5.29061	0.973171		5.29061	0.971865		5.29061	0.972299		5.29061	0.964885		5.29061	0.966363		5.29061	0.963951		5.29061	0.966933
5.36512	0.965984		5.36512	0.965957		5.36512	0.963841		5.36512	0.970168		5.36512	0.971796		5.36512	0.970105		5.36512	0.971838		5.36512	0.970434		5.36512	0.972486		5.36512	0.973072		5.36512	0.973691		5.36512	0.97209		5.36512	0.972653		5.36512	0.964693		5.36512	0.964776		5.36512	0.965011		5.36512	0.966334
5.43964	0.966451		5.43964	0.966402		5.43964	0.963908		5.43964	0.969249		5.43964	0.970931		5.43964	0.970806		5.43964	0.972032		5.43964	0.970506		5.43964	0.972932		5.43964	0.973083		5.43964	0.972727		5.43964	0.973168		5.43964	0.972265		5.43964	0.963504		5.43964	0.96604		5.43964	0.966002		5.43964	0.96638
5.51415	0.966111		5.51415	0.965245		5.51415	0.964467		5.51415	0.968265		5.51415	0.971718		5.51415	0.969874		5.51415	0.971413		5.51415	0.969468		5.51415	0.972937		5.51415	0.973432		5.51415	0.973051		5.51415	0.973119		5.51415	0.971957		5.51415	0.964182		5.51415	0.96564		5.51415	0.964663		5.51415	0.967934
5.58867	0.964982		5.58867	0.964676		5.58867	0.965174		5.58867	0.96755		5.58867	0.972035		5.58867	0.969195		5.58867	0.971989		5.58867	0.970465		5.58867	0.97348		5.58867	0.972099		5.58867	0.972375		5.58867	0.972058		5.58867	0.971953		5.58867	0.963399		5.58867	0.96622		5.58867	0.964027		5.58867	0.967656
5.66319	0.964202		5.66319	0.966556		5.66319	0.965936		5.66319	0.968799		5.66319	0.972409		5.66319	0.969537		5.66319	0.971667		5.66319	0.969495		5.66319	0.973124		5.66319	0.971391		5.66319	0.973029		5.66319	0.973519		5.66319	0.972322		5.66319	0.964455		5.66319	0.96498		5.66319	0.963624		5.66319	0.965648
5.7377	0.96351		5.7377	0.965804		5.7377	0.964967		5.7377	0.967925		5.7377	0.972097		5.7377	0.968591		5.7377	0.972037		5.7377	0.969228		5.7377	0.97291		5.7377	0.972598		5.7377	0.972895		5.7377	0.97327		5.7377	0.97322		5.7377	0.964492		5.7377	0.965756		5.7377	0.96261		5.7377	0.965999
5.81222	0.962837		5.81222	0.966258		5.81222	0.964739		5.81222	0.967653		5.81222	0.971428		5.81222	0.969346		5.81222	0.971287		5.81222	0.968678		5.81222	0.97212		5.81222	0.972058		5.81222	0.972635		5.81222	0.971977		5.81222	0.973055		5.81222	0.964206		5.81222	0.966074		5.81222	0.962629		5.81222	0.966002
5.88673	0.964575		5.88673	0.966781		5.88673	0.963769		5.88673	0.966999		5.88673	0.970065		5.88673	0.968852		5.88673	0.970892		5.88673	0.969529		5.88673	0.971085		5.88673	0.971552		5.88673	0.971799		5.88673	0.972873		5.88673	0.973351		5.88673	0.965174		5.88673	0.964251		5.88673	0.962317		5.88673	0.966395
5.96125	0.964898		5.96125	0.966635		5.96125	0.963652		5.96125	0.968958		5.96125	0.969491		5.96125	0.968115		5.96125	0.970263		5.96125	0.969299		5.96125	0.971691		5.96125	0.970092		5.96125	0.970884		5.96125	0.973385		5.96125	0.972878		5.96125	0.964332		5.96125	0.964479		5.96125	0.962189		5.96125	0.96584
6.03576	0.964143		6.03576	0.966937		6.03576	0.962554		6.03576	0.968187		6.03576	0.970336		6.03576	0.969136		6.03576	0.970054		6.03576	0.969495		6.03576	0.971018		6.03576	0.969769		6.03576	0.970255		6.03576	0.972737		6.03576	0.972785		6.03576	0.963673		6.03576	0.964702		6.03576	0.962871		6.03576	0.965542
6.11028	0.965143		6.11028	0.966253		6.11028	0.962541		6.11028	0.966588		6.11028	0.970326		6.11028	0.96824		6.11028	0.969035		6.11028	0.969625		6.11028	0.970917		6.11028	0.970199		6.11028	0.970141		6.11028	0.973034		6.11028	0.971437		6.11028	0.964158		6.11028	0.964156		6.11028	0.963788		6.11028	0.965322
6.18479	0.963791		6.18479	0.966718		6.18479	0.963436		6.18479	0.966828		6.18479	0.969596		6.18479	0.968243		6.18479	0.968636		6.18479	0.969907		6.18479	0.971806		6.18479	0.968482		6.18479	0.970375		6.18479	0.973067		6.18479	0.971928		6.18479	0.963429		6.18479	0.963658		6.18479	0.963292		6.18479	0.965241
6.25931	0.9636		6.25931	0.966027		6.25931	0.964271		6.25931	0.967399		6.25931	0.970443		6.25931	0.967351		6.25931	0.969862		6.25931	0.969341		6.25931	0.971092		6.25931	0.969136		6.25931	0.970674		6.25931	0.973131		6.25931	0.971177		6.25931	0.962725		6.25931	0.964334		6.25931	0.962678		6.25931	0.965217
6.33383	0.963693		6.33383	0.965496		6.33383	0.963666		6.33383	0.967984		6.33383	0.969791		6.33383	0.968382		6.33383	0.968901		6.33383	0.969529		6.33383	0.971319		6.33383	0.970134		6.33383	0.970644		6.33383	0.971968		6.33383	0.972185		6.33383	0.96233		6.33383	0.964996		6.33383	0.962938		6.33383	0.965087
6.40834	0.963229		6.40834	0.964248		6.40834	0.96375		6.40834	0.966862		6.40834	0.968924		6.40834	0.967685		6.40834	0.969462		6.40834	0.968319		6.40834	0.970243		6.40834	0.969112		6.40834	0.971526		6.40834	0.972427		6.40834	0.971047		6.40834	0.961451		6.40834	0.963831		6.40834	0.963337		6.40834	0.965101
6.48286	0.962655		6.48286	0.962533		6.48286	0.962658		6.48286	0.967704		6.48286	0.968208		6.48286	0.967212		6.48286	0.97011		6.48286	0.968797		6.48286	0.969694		6.48286	0.970395		6.48286	0.971616		6.48286	0.971945		6.48286	0.970444		6.48286	0.962776		6.48286	0.963973		6.48286	0.962592		6.48286	0.966309
6.55737	0.962008		6.55737	0.962175		6.55737	0.96212		6.55737	0.968368		6.55737	0.970002		6.55737	0.967888		6.55737	0.969629		6.55737	0.968508		6.55737	0.968652		6.55737	0.970902		6.55737	0.971677		6.55737	0.970774		6.55737	0.970089		6.55737	0.96281		6.55737	0.96395		6.55737	0.961579		6.55737	0.96505
6.63189	0.96354		6.63189	0.962493		6.63189	0.962		6.63189	0.966955		6.63189	0.96958		6.63189	0.967871		6.63189	0.968807		6.63189	0.96771		6.63189	0.968973		6.63189	0.969836		6.63189	0.970069		6.63189	0.97011		6.63189	0.969652		6.63189	0.962599		6.63189	0.962779		6.63189	0.961193		6.63189	0.966008
6.7064	0.963644		6.7064	0.963055		6.7064	0.963132		6.7064	0.966028		6.7064	0.970169		6.7064	0.968527		6.7064	0.96962		6.7064	0.967784		6.7064	0.969584		6.7064	0.968798		6.7064	0.970037		6.7064	0.971713		6.7064	0.968482		6.7064	0.964213		6.7064	0.96366		6.7064	0.962159		6.7064	0.964882
6.78092	0.963425		6.78092	0.963828		6.78092	0.964091		6.78092	0.967368		6.78092	0.969703		6.78092	0.96848		6.78092	0.97007		6.78092	0.967712		6.78092	0.969678		6.78092	0.96853		6.78092	0.970898		6.78092	0.971716		6.78092	0.969826		6.78092	0.9639		6.78092	0.963003		6.78092	0.963334		6.78092	0.964694
6.85544	0.963155		6.85544	0.964071		6.85544	0.964457		6.85544	0.967349		6.85544	0.968883		6.85544	0.96815		6.85544	0.970445		6.85544	0.967113		6.85544	0.969994		6.85544	0.967978		6.85544	0.97099		6.85544	0.9706		6.85544	0.969429		6.85544	0.963612		6.85544	0.962683		6.85544	0.963682		6.85544	0.964424
6.92995	0.962016		6.92995	0.963992		6.92995	0.963854		6.92995	0.966833		6.92995	0.967492		6.92995	0.968141		6.92995	0.969913		6.92995	0.968794		6.92995	0.969238		6.92995	0.969593		6.92995	0.971333		6.92995	0.969998		6.92995	0.970074		6.92995	0.962896		6.92995	0.962654		6.92995	0.963306		6.92995	0.964431
7.00447	0.962205		7.00447	0.963631		7.00447	0.963905		7.00447	0.96587		7.00447	0.967562		7.00447	0.967317		7.00447	0.96847		7.00447	0.968504		7.00447	0.96929		7.00447	0.970739		7.00447	0.969462		7.00447	0.970907		7.00447	0.969667		7.00447	0.96202		7.00447	0.960669		7.00447	0.963618		7.00447	0.964442
7.07898	0.962304		7.07898	0.963657		7.07898	0.963732		7.07898	0.966514		7.07898	0.967591		7.07898	0.967474		7.07898	0.968843		7.07898	0.969713		7.07898	0.969548		7.07898	0.970285		7.07898	0.970238		7.07898	0.969385		7.07898	0.969329		7.07898	0.962327		7.07898	0.96218		7.07898	0.962638		7.07898	0.964028
7.1535	0.96241		7.1535	0.963503		7.1535	0.962175		7.1535	0.965408		7.1535	0.966985		7.1535	0.967209		7.1535	0.967014		7.1535	0.969283		7.1535	0.971195		7.1535	0.970647		7.1535	0.970565		7.1535	0.969708		7.1535	0.968312		7.1535	0.961595		7.1535	0.961695		7.1535	0.962192		7.1535	0.965246
7.22801	0.961057		7.22801	0.963448		7.22801	0.961981		7.22801	0.966774		7.22801	0.966756		7.22801	0.967457		7.22801	0.967765		7.22801	0.96959		7.22801	0.970925		7.22801	0.970217		7.22801	0.9697		7.22801	0.970141		7.22801	0.969637		7.22801	0.961471		7.22801	0.961474		7.22801	0.962668		7.22801	0.963754
7.30253	0.960707		7.30253	0.963191		7.30253	0.962976		7.30253	0.96688		7.30253	0.966522		7.30253	0.965822		7.30253	0.968284		7.30253	0.969953		7.30253	0.969895		7.30253	0.96951		7.30253	0.969923		7.30253	0.970867		7.30253	0.969086		7.30253	0.96077		7.30253	0.961083		7.30253	0.963589		7.30253	0.962739
7.37704	0.961198		7.37704	0.963371		7.37704	0.961931		7.37704	0.96539		7.37704	0.966671		7.37704	0.965628		7.37704	0.968838		7.37704	0.969513		7.37704	0.968989		7.37704	0.968044		7.37704	0.968703		7.37704	0.969724		7.37704	0.969666		7.37704	0.960644		7.37704	0.960616		7.37704	0.961889		7.37704	0.96304
7.45156	0.960963		7.45156	0.962705		7.45156	0.960808		7.45156	0.964269		7.45156	0.966457		7.45156	0.967111		7.45156	0.967574		7.45156	0.968064		7.45156	0.968533		7.45156	0.96859		7.45156	0.969256		7.45156	0.969583		7.45156	0.969097		7.45156	0.960031		7.45156	0.961612		7.45156	0.962241		7.45156	0.963806
7.52608	0.960684		7.52608	0.961997		7.52608	0.960532		7.52608	0.964673		7.52608	0.967126		7.52608	0.966553		7.52608	0.967248		7.52608	0.968262		7.52608	0.969215		7.52608	0.968956		7.52608	0.970089		7.52608	0.968596		7.52608	0.9699		7.52608	0.960286		7.52608	0.962158		7.52608	0.961847		7.52608	0.963102
7.60059	0.96115		7.60059	0.962758		7.60059	0.960751		7.60059	0.964178		7.60059	0.967518		7.60059	0.967604		7.60059	0.967268		7.60059	0.967555		7.60059	0.969735		7.60059	0.969565		7.60059	0.97006		7.60059	0.96898		7.60059	0.970181		7.60059	0.96174		7.60059	0.960907		7.60059	0.960899		7.60059	0.963809
7.67511	0.961219		7.67511	0.963168		7.67511	0.960711		7.67511	0.964145		7.67511	0.967076		7.67511	0.967367		7.67511	0.967094		7.67511	0.967817		7.67511	0.969922		7.67511	0.968304		7.67511	0.969934		7.67511	0.967725		7.67511	0.969381		7.67511	0.961605		7.67511	0.960002		7.67511	0.96111		7.67511	0.96327
7.74962	0.959447		7.74962	0.963171		7.74962	0.960187		7.74962	0.964678		7.74962	0.966355		7.74962	0.966769		7.74962	0.967362		7.74962	0.96665		7.74962	0.968543		7.74962	0.969588		7.74962	0.969001		7.74962	0.968515		7.74962	0.968342		7.74962	0.960508		7.74962	0.959275		7.74962	0.96127		7.74962	0.962583
7.82414	0.959546		7.82414	0.963016		7.82414	0.959717		7.82414	0.964859		7.82414	0.967617		7.82414	0.966527		7.82414	0.967725		7.82414	0.966918		7.82414	0.968097		7.82414	0.968616		7.82414	0.968181		7.82414	0.9692		7.82414	0.96774		7.82414	0.960547		7.82414	0.959444		7.82414	0.96153		7.82414	0.961342
7.89865	0.958591		7.89865	0.962553		7.89865	0.959124		7.89865	0.96423		7.89865	0.967146		7.89865	0.967432		7.89865	0.966835		7.89865	0.966128		7.89865	0.967244		7.89865	0.967258		7.89865	0.968471		7.89865	0.969994		7.89865	0.967762		7.89865	0.960676		7.89865	0.961151		7.89865	0.962047		7.89865	0.961457
7.97317	0.959405		7.97317	0.961395		7.97317	0.958597		7.97317	0.964855		7.97317	0.967581		7.97317	0.96646		7.97317	0.967816		7.97317	0.965521		7.97317	0.968247		7.97317	0.96927		7.97317	0.968315		7.97317	0.969049		7.97317	0.967462		7.97317	0.960944		7.97317	0.960764		7.97317	0.961457		7.97317	0.962554
8.04768	0.959803		8.04768	0.960738		8.04768	0.959634		8.04768	0.965272		8.04768	0.966615		8.04768	0.966698		8.04768	0.966545		8.04768	0.965861		8.04768	0.969042		8.04768	0.968854		8.04768	0.969186		8.04768	0.970003		8.04768	0.967507		8.04768	0.960407		8.04768	0.960173		8.04768	0.961833		8.04768	0.963398
8.1222	0.959804		8.1222	0.960234		8.1222	0.95972		8.1222	0.965891		8.1222	0.967121		8.1222	0.965887		8.1222	0.966129		8.1222	0.964906		8.1222	0.968298		8.1222	0.968066		8.1222	0.967538		8.1222	0.969615		8.1222	0.967917		8.1222	0.96032		8.1222	0.959021		8.1222	0.960361		8.1222	0.964072
8.19672	0.959481		8.19672	0.961511		8.19672	0.960504		8.19672	0.965531		8.19672	0.968058		8.19672	0.964194		8.19672	0.96565		8.19672	0.965393		8.19672	0.968773		8.19672	0.967266		8.19672	0.969251		8.19672	0.969995		8.19672	0.967098		8.19672	0.959801		8.19672	0.959962		8.19672	0.959498		8.19672	0.963536
8.27123	0.959416		8.27123	0.961678		8.27123	0.960662		8.27123	0.965252		8.27123	0.967525		8.27123	0.965524		8.27123	0.965204		8.27123	0.964391		8.27123	0.967201		8.27123	0.966921		8.27123	0.969267		8.27123	0.969937		8.27123	0.967488		8.27123	0.959345		8.27123	0.960932		8.27123	0.958703		8.27123	0.964796
8.34575	0.959082		8.34575	0.961612		8.34575	0.960759		8.34575	0.966759		8.34575	0.967376		8.34575	0.964345		8.34575	0.964665		8.34575	0.964423		8.34575	0.96785		8.34575	0.966928		8.34575	0.968021		8.34575	0.968723		8.34575	0.967381		8.34575	0.959591		8.34575	0.959302		8.34575	0.958687		8.34575	0.963514
8.42026	0.958615		8.42026	0.960537		8.42026	0.961502		8.42026	0.966319		8.42026	0.96657		8.42026	0.964417		8.42026	0.965906		8.42026	0.965584		8.42026	0.966019		8.42026	0.967465		8.42026	0.966682		8.42026	0.968369		8.42026	0.96654		8.42026	0.960009		8.42026	0.959362		8.42026	0.958936		8.42026	0.962444
8.49478	0.958084		8.49478	0.959685		8.49478	0.961577		8.49478	0.966113		8.49478	0.966713		8.49478	0.965329		8.49478	0.965598		8.49478	0.966241		8.49478	0.966886		8.49478	0.966861		8.49478	0.966615		8.49478	0.968559		8.49478	0.967889		8.49478	0.959461		8.49478	0.959248		8.49478	0.960324		8.49478	0.962982
8.56929	0.957613		8.56929	0.961239		8.56929	0.960895		8.56929	0.966664		8.56929	0.967022		8.56929	0.965714		8.56929	0.966939		8.56929	0.965882		8.56929	0.966835		8.56929	0.966432		8.56929	0.967873		8.56929	0.968755		8.56929	0.969012		8.56929	0.958369		8.56929	0.958104		8.56929	0.960763		8.56929	0.963028
8.64381	0.956891		8.64381	0.961423		8.64381	0.961724		8.64381	0.965894		8.64381	0.96582		8.64381	0.966486		8.64381	0.967408		8.64381	0.96623		8.64381	0.966452		8.64381	0.967875		8.64381	0.96843		8.64381	0.968418		8.64381	0.968876		8.64381	0.958687		8.64381	0.957476		8.64381	0.959107		8.64381	0.962353
8.71833	0.957456		8.71833	0.96199		8.71833	0.960097		8.71833	0.965597		8.71833	0.965892		8.71833	0.967207		8.71833	0.968067		8.71833	0.967011		8.71833	0.966482		8.71833	0.968069		8.71833	0.96784		8.71833	0.96838		8.71833	0.968747		8.71833	0.959143		8.71833	0.957884		8.71833	0.959574		8.71833	0.962275
8.79284	0.958356		8.79284	0.962395		8.79284	0.959529		8.79284	0.964584		8.79284	0.965326		8.79284	0.96702		8.79284	0.967708		8.79284	0.967429		8.79284	0.967855		8.79284	0.967312		8.79284	0.967087		8.79284	0.96864		8.79284	0.968555		8.79284	0.957844		8.79284	0.959975		8.79284	0.958305		8.79284	0.962275
8.86736	0.958837		8.86736	0.962155		8.86736	0.959871		8.86736	0.964026		8.86736	0.966763		8.86736	0.966908		8.86736	0.96694		8.86736	0.966318		8.86736	0.9663		8.86736	0.967903		8.86736	0.967452		8.86736	0.96837		8.86736	0.968377		8.86736	0.959367		8.86736	0.958626		8.86736	0.959126		8.86736	0.962389
8.94187	0.957741		8.94187	0.961726		8.94187	0.959739		8.94187	0.963799		8.94187	0.966371		8.94187	0.965048		8.94187	0.966795		8.94187	0.965377		8.94187	0.966157		8.94187	0.968477		8.94187	0.967754		8.94187	0.968737		8.94187	0.96852		8.94187	0.959117		8.94187	0.958295		8.94187	0.95908		8.94187	0.961968
9.01639	0.957529		9.01639	0.961025		9.01639	0.960393		9.01639	0.963619		9.01639	0.965658		9.01639	0.964452		9.01639	0.966061		9.01639	0.965256		9.01639	0.965797		9.01639	0.96761		9.01639	0.968882		9.01639	0.969022		9.01639	0.969415		9.01639	0.960063		9.01639	0.959171		9.01639	0.958875		9.01639	0.962831
9.0909	0.958778		9.0909	0.960223		9.0909	0.96031		9.0909	0.963413		9.0909	0.966982		9.0909	0.964551		9.0909	0.966315		9.0909	0.964767		9.0909	0.965797		9.0909	0.968701		9.0909	0.968164		9.0909	0.9678		9.0909	0.969109		9.0909	0.95933		9.0909	0.957924		9.0909	0.958026		9.0909	0.96071
9.16542	0.958296		9.16542	0.958917		9.16542	0.961194		9.16542	0.964625		9.16542	0.965726		9.16542	0.963646		9.16542	0.965921		9.16542	0.963039		9.16542	0.965372		9.16542	0.968804		9.16542	0.967723		9.16542	0.967252		9.16542	0.968479		9.16542	0.957695		9.16542	0.958075		9.16542	0.95724		9.16542	0.960288
9.23993	0.957754		9.23993	0.95973		9.23993	0.960293		9.23993	0.96411		9.23993	0.965706		9.23993	0.963118		9.23993	0.966027		9.23993	0.963671		9.23993	0.965135		9.23993	0.968503		9.23993	0.966816		9.23993	0.966429		9.23993	0.968579		9.23993	0.95962		9.23993	0.959288		9.23993	0.957392		9.23993	0.959967
9.31445	0.957741		9.31445	0.960213		9.31445	0.961206		9.31445	0.964901		9.31445	0.964126		9.31445	0.963088		9.31445	0.965062		9.31445	0.96369		9.31445	0.965204		9.31445	0.968838		9.31445	0.966069		9.31445	0.968271		9.31445	0.967403		9.31445	0.959411		9.31445	0.960211		9.31445	0.958471		9.31445	0.960066
9.38897	0.95664		9.38897	0.961291		9.38897	0.960207		9.38897	0.96434		9.38897	0.965043		9.38897	0.964667		9.38897	0.965872		9.38897	0.964958		9.38897	0.966196		9.38897	0.96696		9.38897	0.965755		9.38897	0.967305		9.38897	0.9668		9.38897	0.957828		9.38897	0.959044		9.38897	0.959246		9.38897	0.961416
9.46348	0.957285		9.46348	0.96076		9.46348	0.959703		9.46348	0.962879		9.46348	0.965037		9.46348	0.96507		9.46348	0.965658		9.46348	0.965087		9.46348	0.966801		9.46348	0.966333		9.46348	0.966834		9.46348	0.968536		9.46348	0.967086		9.46348	0.958848		9.46348	0.95875		9.46348	0.958812		9.46348	0.962241
9.538	0.957395		9.538	0.960556		9.538	0.959874		9.538	0.962861		9.538	0.963818		9.538	0.96505		9.538	0.964785		9.538	0.96732		9.538	0.96584		9.538	0.966493		9.538	0.966374		9.538	0.968334		9.538	0.967024		9.538	0.958148		9.538	0.959648		9.538	0.958341		9.538	0.960056
9.61251	0.956939		9.61251	0.95965		9.61251	0.960839		9.61251	0.963062		9.61251	0.96528		9.61251	0.964017		9.61251	0.964469		9.61251	0.966225		9.61251	0.966105		9.61251	0.966804		9.61251	0.967134		9.61251	0.967587		9.61251	0.966664		9.61251	0.958086		9.61251	0.960549		9.61251	0.958718		9.61251	0.960586
9.68703	0.957687		9.68703	0.960342		9.68703	0.959598		9.68703	0.963161		9.68703	0.965084		9.68703	0.965181		9.68703	0.965418		9.68703	0.965814		9.68703	0.965447		9.68703	0.965866		9.68703	0.965863		9.68703	0.966767		9.68703	0.967736		9.68703	0.958002		9.68703	0.960457		9.68703	0.958845		9.68703	0.960034
9.76154	0.959197		9.76154	0.959205		9.76154	0.959235		9.76154	0.963632		9.76154	0.964357		9.76154	0.962784		9.76154	0.96436		9.76154	0.965744		9.76154	0.965665		9.76154	0.965286		9.76154	0.965743		9.76154	0.967897		9.76154	0.968459		9.76154	0.958211		9.76154	0.960335		9.76154	0.958709		9.76154	0.961154
9.83606	0.958463		9.83606	0.959061		9.83606	0.959744		9.83606	0.963195		9.83606	0.964414		9.83606	0.963809		9.83606	0.96604		9.83606	0.965107		9.83606	0.966273		9.83606	0.965366		9.83606	0.965894		9.83606	0.967134		9.83606	0.968542		9.83606	0.957574		9.83606	0.959747		9.83606	0.959016		9.83606	0.960369
9.91057	0.957926		9.91057	0.958552		9.91057	0.960205		9.91057	0.962613		9.91057	0.963892		9.91057	0.96278		9.91057	0.966163		9.91057	0.963428		9.91057	0.964924		9.91057	0.964726		9.91057	0.96721		9.91057	0.967081		9.91057	0.967575		9.91057	0.956964		9.91057	0.958979		9.91057	0.957555		9.91057	0.961194
9.98509	0.958505		9.98509	0.958092		9.98509	0.959819		9.98509	0.962714		9.98509	0.964492		9.98509	0.964144		9.98509	0.965387		9.98509	0.964651		9.98509	0.967054		9.98509	0.966674		9.98509	0.966857		9.98509	0.96797		9.98509	0.96647		9.98509	0.956899		9.98509	0.957776		9.98509	0.957118		9.98509	0.961705
10.0596	0.958522		10.0596	0.958894		10.0596	0.959739		10.0596	0.962837		10.0596	0.96371		10.0596	0.96297		10.0596	0.964882		10.0596	0.965054		10.0596	0.967121		10.0596	0.967328		10.0596	0.966137		10.0596	0.967883		10.0596	0.966193		10.0596	0.95707		10.0596	0.957107		10.0596	0.958282		10.0596	0.962129
10.1341	0.957496		10.1341	0.959789		10.1341	0.959598		10.1341	0.962649		10.1341	0.963171		10.1341	0.963227		10.1341	0.963509		10.1341	0.96466		10.1341	0.967638		10.1341	0.966958		10.1341	0.967137		10.1341	0.968393		10.1341	0.966696		10.1341	0.95677		10.1341	0.95782		10.1341	0.958026		10.1341	0.962912
10.2086	0.95772		10.2086	0.959781		10.2086	0.958876		10.2086	0.96325		10.2086	0.963497		10.2086	0.963982		10.2086	0.963629		10.2086	0.963908		10.2086	0.966829		10.2086	0.966233		10.2086	0.967658		10.2086	0.9675		10.2086	0.966326		10.2086	0.958255		10.2086	0.958379		10.2086	0.958518		10.2086	0.96246
10.2832	0.956595		10.2832	0.959345		10.2832	0.958951		10.2832	0.963896		10.2832	0.963656		10.2832	0.963524		10.2832	0.96517		10.2832	0.964279		10.2832	0.966242		10.2832	0.966225		10.2832	0.967405		10.2832	0.967532		10.2832	0.965669		10.2832	0.958754		10.2832	0.95768		10.2832	0.95819		10.2832	0.961876
10.3577	0.956098		10.3577	0.959153		10.3577	0.957785		10.3577	0.964027		10.3577	0.963574		10.3577	0.963431		10.3577	0.965592		10.3577	0.96416		10.3577	0.964373		10.3577	0.965323		10.3577	0.967172		10.3577	0.968303		10.3577	0.965895		10.3577	0.956818		10.3577	0.958769		10.3577	0.957024		10.3577	0.961109
10.4322	0.957135		10.4322	0.959986		10.4322	0.957757		10.4322	0.964656		10.4322	0.963866		10.4322	0.963221		10.4322	0.965327		10.4322	0.964903		10.4322	0.964846		10.4322	0.96504		10.4322	0.967092		10.4322	0.966776		10.4322	0.965521		10.4322	0.957064		10.4322	0.957719		10.4322	0.956815		10.4322	0.96102
10.5067	0.95655		10.5067	0.958485		10.5067	0.957375		10.5067	0.965146		10.5067	0.964394		10.5067	0.961998		10.5067	0.965114		10.5067	0.964256		10.5067	0.965029		10.5067	0.964951		10.5067	0.966472		10.5067	0.966275		10.5067	0.965958		10.5067	0.956847		10.5067	0.958384		10.5067	0.957042		10.5067	0.961813
10.5812	0.957256		10.5812	0.958186		10.5812	0.957447		10.5812	0.964366		10.5812	0.96459		10.5812	0.962911		10.5812	0.965228		10.5812	0.963509		10.5812	0.963918		10.5812	0.964792		10.5812	0.966625		10.5812	0.966117		10.5812	0.965624		10.5812	0.957597		10.5812	0.956848		10.5812	0.957781		10.5812	0.961549
10.6557	0.956559		10.6557	0.95858		10.6557	0.958442		10.6557	0.965246		10.6557	0.964146		10.6557	0.964421		10.6557	0.965047		10.6557	0.96286		10.6557	0.963924		10.6557	0.964066		10.6557	0.96538		10.6557	0.96573		10.6557	0.964325		10.6557	0.957089		10.6557	0.958653		10.6557	0.956372		10.6557	0.961495
10.7302	0.957327		10.7302	0.958824		10.7302	0.957716		10.7302	0.964653		10.7302	0.965124		10.7302	0.963858		10.7302	0.965108		10.7302	0.964072		10.7302	0.964338		10.7302	0.965364		10.7302	0.966869		10.7302	0.96675		10.7302	0.965144		10.7302	0.95638		10.7302	0.959188		10.7302	0.956883		10.7302	0.961161
10.8048	0.956695		10.8048	0.958733		10.8048	0.95715		10.8048	0.965113		10.8048	0.96524		10.8048	0.96373		10.8048	0.96533		10.8048	0.963643		10.8048	0.964068		10.8048	0.965323		10.8048	0.965213		10.8048	0.96695		10.8048	0.964692		10.8048	0.956643		10.8048	0.957732		10.8048	0.956404		10.8048	0.960652
10.8793	0.95822		10.8793	0.957231		10.8793	0.956859		10.8793	0.964457		10.8793	0.964703		10.8793	0.962921		10.8793	0.964069		10.8793	0.962451		10.8793	0.964042		10.8793	0.966381		10.8793	0.964844		10.8793	0.965993		10.8793	0.965982		10.8793	0.957895		10.8793	0.957633		10.8793	0.95635		10.8793	0.960959
10.9538	0.958106		10.9538	0.957235		10.9538	0.955647		10.9538	0.963047		10.9538	0.964774		10.9538	0.963657		10.9538	0.963655		10.9538	0.963953		10.9538	0.964681		10.9538	0.966284		10.9538	0.965126		10.9538	0.967446		10.9538	0.966094		10.9538	0.957281		10.9538	0.956949		10.9538	0.956479		10.9538	0.96153
11.0283	0.957849		11.0283	0.957206		11.0283	0.95745		11.0283	0.962525		11.0283	0.963493		11.0283	0.963266		11.0283	0.964457		11.0283	0.964296		11.0283	0.964777		11.0283	0.966705		11.0283	0.964995		11.0283	0.967052		11.0283	0.966371		11.0283	0.957176		11.0283	0.956416		11.0283	0.955757		11.0283	0.960916
11.1028	0.958549		11.1028	0.958061		11.1028	0.957672		11.1028	0.963708		11.1028	0.962435		11.1028	0.961676		11.1028	0.96428		11.1028	0.964602		11.1028	0.966179		11.1028	0.966108		11.1028	0.964761		11.1028	0.96594		11.1028	0.966058		11.1028	0.955535		11.1028	0.956655		11.1028	0.955387		11.1028	0.960285
11.1773	0.958091		11.1773	0.957454		11.1773	0.958059		11.1773	0.963917		11.1773	0.962625		11.1773	0.962111		11.1773	0.962391		11.1773	0.964317		11.1773	0.965764		11.1773	0.967264		11.1773	0.964676		11.1773	0.965868		11.1773	0.96591		11.1773	0.955116		11.1773	0.957417		11.1773	0.955332		11.1773	0.959886
11.2519	0.957127		11.2519	0.956531		11.2519	0.957597		11.2519	0.963679		11.2519	0.962351		11.2519	0.961557		11.2519	0.962051		11.2519	0.964149		11.2519	0.965794		11.2519	0.9674		11.2519	0.964659		11.2519	0.964675		11.2519	0.966504		11.2519	0.955044		11.2519	0.957447		11.2519	0.956325		11.2519	0.960134
11.3264	0.956239		11.3264	0.956438		11.3264	0.958655		11.3264	0.962734		11.3264	0.962822		11.3264	0.960918		11.3264	0.964374		11.3264	0.963724		11.3264	0.965856		11.3264	0.965453		11.3264	0.966143		11.3264	0.965087		11.3264	0.964581		11.3264	0.954997		11.3264	0.95839		11.3264	0.957046		11.3264	0.960221
11.4009	0.956151		11.4009	0.956342		11.4009	0.958372		11.4009	0.962369		11.4009	0.96243		11.4009	0.963283		11.4009	0.96408		11.4009	0.963639		11.4009	0.965808		11.4009	0.9648		11.4009	0.964794		11.4009	0.964565		11.4009	0.964214		11.4009	0.955418		11.4009	0.958751		11.4009	0.957203		11.4009	0.95828
11.4754	0.955895		11.4754	0.956794		11.4754	0.958395		11.4754	0.961158		11.4754	0.961879		11.4754	0.963231		11.4754	0.96482		11.4754	0.963048		11.4754	0.967154		11.4754	0.966037		11.4754	0.964693		11.4754	0.964491		11.4754	0.964536		11.4754	0.954952		11.4754	0.959206		11.4754	0.957204		11.4754	0.959828
11.5499	0.956643		11.5499	0.956506		11.5499	0.957655		11.5499	0.961783		11.5499	0.96283		11.5499	0.961776		11.5499	0.96345		11.5499	0.963517		11.5499	0.966614		11.5499	0.965801		11.5499	0.963982		11.5499	0.964366		11.5499	0.964017		11.5499	0.955492		11.5499	0.957542		11.5499	0.956393		11.5499	0.959594
11.6244	0.955625		11.6244	0.957555		11.6244	0.957723		11.6244	0.962197		11.6244	0.963655		11.6244	0.962105		11.6244	0.964106		11.6244	0.962694		11.6244	0.96673		11.6244	0.966674		11.6244	0.963609		11.6244	0.965874		11.6244	0.964455		11.6244	0.95427		11.6244	0.957738		11.6244	0.95532		11.6244	0.960135
11.6989	0.957102		11.6989	0.958937		11.6989	0.957926		11.6989	0.961326		11.6989	0.964221		11.6989	0.96301		11.6989	0.962584		11.6989	0.962518		11.6989	0.96548		11.6989	0.965681		11.6989	0.96516		11.6989	0.965834		11.6989	0.963909		11.6989	0.954702		11.6989	0.957269		11.6989	0.956417		11.6989	0.960898
11.7735	0.955643		11.7735	0.959321		11.7735	0.958264		11.7735	0.961173		11.7735	0.964544		11.7735	0.961963		11.7735	0.962164		11.7735	0.963834		11.7735	0.966622		11.7735	0.964348		11.7735	0.965523		11.7735	0.967238		11.7735	0.9655		11.7735	0.954102		11.7735	0.956813		11.7735	0.956913		11.7735	0.960652
11.848	0.955905		11.848	0.958803		11.848	0.958065		11.848	0.960213		11.848	0.964221		11.848	0.961312		11.848	0.962685		11.848	0.963389		11.848	0.965673		11.848	0.96524		11.848	0.96471		11.848	0.966378		11.848	0.966154		11.848	0.954828		11.848	0.956659		11.848	0.957083		11.848	0.961191
11.9225	0.95585		11.9225	0.959421		11.9225	0.957206		11.9225	0.960402		11.9225	0.964213		11.9225	0.961405		11.9225	0.962915		11.9225	0.963823		11.9225	0.964693		11.9225	0.965659		11.9225	0.965152		11.9225	0.96672		11.9225	0.965658		11.9225	0.955161		11.9225	0.956769		11.9225	0.95591		11.9225	0.961286
11.997	0.955125		11.997	0.959504		11.997	0.957048		11.997	0.960777		11.997	0.964518		11.997	0.961864		11.997	0.962981		11.997	0.964541		11.997	0.964836		11.997	0.965299		11.997	0.965738		11.997	0.967383		11.997	0.965111		11.997	0.954944		11.997	0.956463		11.997	0.956619		11.997	0.960074
12.0715	0.955387		12.0715	0.959879		12.0715	0.956049		12.0715	0.961308		12.0715	0.962401		12.0715	0.960817		12.0715	0.962316		12.0715	0.965193		12.0715	0.96451		12.0715	0.965586		12.0715	0.966561		12.0715	0.967239		12.0715	0.964183		12.0715	0.954778		12.0715	0.956977		12.0715	0.955327		12.0715	0.958967
12.146	0.954371		12.146	0.959174		12.146	0.956895		12.146	0.961268		12.146	0.962068		12.146	0.960634		12.146	0.962247		12.146	0.965311		12.146	0.96398		12.146	0.965598		12.146	0.965314		12.146	0.966994		12.146	0.965637		12.146	0.955343		12.146	0.957976		12.146	0.95631		12.146	0.960899
12.2206	0.954788		12.2206	0.958787		12.2206	0.957084		12.2206	0.960907		12.2206	0.961374		12.2206	0.960822		12.2206	0.962759		12.2206	0.965209		12.2206	0.964814		12.2206	0.966153		12.2206	0.965364		12.2206	0.966436		12.2206	0.966415		12.2206	0.954425		12.2206	0.957643		12.2206	0.956075		12.2206	0.960184
12.2951	0.955272		12.2951	0.957798		12.2951	0.956651		12.2951	0.962342		12.2951	0.961535		12.2951	0.960166		12.2951	0.962785		12.2951	0.96562		12.2951	0.963717		12.2951	0.964833		12.2951	0.965135		12.2951	0.966672		12.2951	0.965758		12.2951	0.955808		12.2951	0.957047		12.2951	0.956895		12.2951	0.959194
12.3696	0.95435		12.3696	0.957358		12.3696	0.956377		12.3696	0.963082		12.3696	0.96069		12.3696	0.960657		12.3696	0.963484		12.3696	0.964235		12.3696	0.964461		12.3696	0.966107		12.3696	0.964621		12.3696	0.966876		12.3696	0.965453		12.3696	0.956309		12.3696	0.956281		12.3696	0.955271		12.3696	0.959452
12.4441	0.954838		12.4441	0.958203		12.4441	0.955038		12.4441	0.962604		12.4441	0.96041		12.4441	0.961222		12.4441	0.962979		12.4441	0.964138		12.4441	0.965014		12.4441	0.965606		12.4441	0.966321		12.4441	0.967325		12.4441	0.964332		12.4441	0.956843		12.4441	0.957254		12.4441	0.954829		12.4441	0.959058
12.5186	0.955108		12.5186	0.958397		12.5186	0.95478		12.5186	0.962466		12.5186	0.96112		12.5186	0.96102		12.5186	0.964202		12.5186	0.964074		12.5186	0.965072		12.5186	0.964871		12.5186	0.96428		12.5186	0.966792		12.5186	0.964914		12.5186	0.957531		12.5186	0.956983		12.5186	0.955215		12.5186	0.960193
12.5931	0.955811		12.5931	0.95962		12.5931	0.955157		12.5931	0.963351		12.5931	0.961755		12.5931	0.960782		12.5931	0.96499		12.5931	0.963713		12.5931	0.964417		12.5931	0.965498		12.5931	0.963799		12.5931	0.96601		12.5931	0.96549		12.5931	0.956383		12.5931	0.956888		12.5931	0.95559		12.5931	0.958883
12.6677	0.956036		12.6677	0.958665		12.6677	0.956128		12.6677	0.963576		12.6677	0.962366		12.6677	0.959238		12.6677	0.964489		12.6677	0.964444		12.6677	0.963525		12.6677	0.964761		12.6677	0.964208		12.6677	0.966137		12.6677	0.965924		12.6677	0.954679		12.6677	0.956297		12.6677	0.954542		12.6677	0.959265
12.7422	0.954532		12.7422	0.958835		12.7422	0.955859		12.7422	0.963465		12.7422	0.962542		12.7422	0.959908		12.7422	0.964979		12.7422	0.965283		12.7422	0.963036		12.7422	0.964725		12.7422	0.96511		12.7422	0.966271		12.7422	0.964621		12.7422	0.954763		12.7422	0.956273		12.7422	0.954413		12.7422	0.959128
12.8167	0.955289		12.8167	0.958543		12.8167	0.955708		12.8167	0.963858		12.8167	0.960946		12.8167	0.959868		12.8167	0.965016		12.8167	0.964453		12.8167	0.963776		12.8167	0.963781		12.8167	0.965209		12.8167	0.966085		12.8167	0.964		12.8167	0.954652		12.8167	0.956495		12.8167	0.954349		12.8167	0.957832
12.8912	0.954754		12.8912	0.957637		12.8912	0.955952		12.8912	0.963316		12.8912	0.960344		12.8912	0.960714		12.8912	0.964842		12.8912	0.963879		12.8912	0.963991		12.8912	0.964511		12.8912	0.965735		12.8912	0.965068		12.8912	0.96454		12.8912	0.954945		12.8912	0.95693		12.8912	0.95441		12.8912	0.958786
12.9657	0.954984		12.9657	0.957863		12.9657	0.956817		12.9657	0.962714		12.9657	0.95977		12.9657	0.961232		12.9657	0.96491		12.9657	0.964273		12.9657	0.964872		12.9657	0.965123		12.9657	0.965939		12.9657	0.964336		12.9657	0.965687		12.9657	0.95455		12.9657	0.956235		12.9657	0.954843		12.9657	0.957904
13.0402	0.955327		13.0402	0.957061		13.0402	0.956204		13.0402	0.961584		13.0402	0.960708		13.0402	0.96014		13.0402	0.964434		13.0402	0.963958		13.0402	0.964927		13.0402	0.964768		13.0402	0.966675		13.0402	0.96475		13.0402	0.966225		13.0402	0.954254		13.0402	0.956156		13.0402	0.955244		13.0402	0.958028
13.1147	0.955178		13.1147	0.956334		13.1147	0.954739		13.1147	0.962218		13.1147	0.959876		13.1147	0.960235		13.1147	0.964109		13.1147	0.963069		13.1147	0.964897		13.1147	0.962232		13.1147	0.964154		13.1147	0.965336		13.1147	0.963906		13.1147	0.955363		13.1147	0.957002		13.1147	0.955532		13.1147	0.958598
13.1893	0.955105		13.1893	0.957146		13.1893	0.954652		13.1893	0.960932		13.1893	0.961091		13.1893	0.95973		13.1893	0.964122		13.1893	0.963939		13.1893	0.96505		13.1893	0.963214		13.1893	0.963752		13.1893	0.964701		13.1893	0.9646		13.1893	0.95477		13.1893	0.956671		13.1893	0.955484		13.1893	0.958128
13.2638	0.95435		13.2638	0.957912		13.2638	0.954589		13.2638	0.960795		13.2638	0.961719		13.2638	0.959794		13.2638	0.963593		13.2638	0.963484		13.2638	0.963742		13.2638	0.963424		13.2638	0.963112		13.2638	0.963687		13.2638	0.964868		13.2638	0.955071		13.2638	0.957553		13.2638	0.955641		13.2638	0.958964
13.3383	0.953882		13.3383	0.957209		13.3383	0.955395		13.3383	0.960243		13.3383	0.962224		13.3383	0.95964		13.3383	0.96243		13.3383	0.96326		13.3383	0.963274		13.3383	0.963917		13.3383	0.963035		13.3383	0.964666		13.3383	0.964276		13.3383	0.95515		13.3383	0.957438		13.3383	0.955829		13.3383	0.959241
13.4128	0.954555		13.4128	0.958341		13.4128	0.956659		13.4128	0.960772		13.4128	0.962836		13.4128	0.960174		13.4128	0.962639		13.4128	0.964127		13.4128	0.962972		13.4128	0.963373		13.4128	0.962755		13.4128	0.964588		13.4128	0.962922		13.4128	0.954088		13.4128	0.957601		13.4128	0.955707		13.4128	0.958134
13.4873	0.95445		13.4873	0.957541		13.4873	0.955432		13.4873	0.961297		13.4873	0.963075		13.4873	0.960657		13.4873	0.962627		13.4873	0.963467		13.4873	0.963534		13.4873	0.963714		13.4873	0.962573		13.4873	0.965989		13.4873	0.963835		13.4873	0.954054		13.4873	0.957089		13.4873	0.955527		13.4873	0.959233
13.5618	0.954909		13.5618	0.956458		13.5618	0.955523		13.5618	0.96075		13.5618	0.962078		13.5618	0.960299		13.5618	0.9619		13.5618	0.963465		13.5618	0.963756		13.5618	0.963975		13.5618	0.96285		13.5618	0.965967		13.5618	0.962716		13.5618	0.9547		13.5618	0.956076		13.5618	0.954958		13.5618	0.959423
13.6364	0.954905		13.6364	0.957044		13.6364	0.955235		13.6364	0.96182		13.6364	0.960963		13.6364	0.961239		13.6364	0.962034		13.6364	0.964742		13.6364	0.963655		13.6364	0.965466		13.6364	0.963727		13.6364	0.965575		13.6364	0.963961		13.6364	0.955155		13.6364	0.956679		13.6364	0.95546		13.6364	0.95956
13.7109	0.953858		13.7109	0.955453		13.7109	0.955438		13.7109	0.96212		13.7109	0.961686		13.7109	0.961715		13.7109	0.962097		13.7109	0.963984		13.7109	0.963861		13.7109	0.965313		13.7109	0.963052		13.7109	0.964464		13.7109	0.963715		13.7109	0.954175		13.7109	0.956397		13.7109	0.955757		13.7109	0.960347
13.7854	0.953862		13.7854	0.956297		13.7854	0.955709		13.7854	0.961778		13.7854	0.961145		13.7854	0.961112		13.7854	0.961155		13.7854	0.963559		13.7854	0.963706		13.7854	0.964355		13.7854	0.963006		13.7854	0.965953		13.7854	0.964295		13.7854	0.954425		13.7854	0.955849		13.7854	0.955156		13.7854	0.959768
13.8599	0.954419		13.8599	0.95599		13.8599	0.955845		13.8599	0.961486		13.8599	0.962161		13.8599	0.959812		13.8599	0.96201		13.8599	0.964085		13.8599	0.962939		13.8599	0.963515		13.8599	0.963052		13.8599	0.966055		13.8599	0.96311		13.8599	0.954475		13.8599	0.955828		13.8599	0.954354		13.8599	0.95982
13.9344	0.955465		13.9344	0.956164		13.9344	0.956046		13.9344	0.96104		13.9344	0.962094		13.9344	0.961002		13.9344	0.962174		13.9344	0.962413		13.9344	0.9626		13.9344	0.963719		13.9344	0.963834		13.9344	0.965061		13.9344	0.963762		13.9344	0.95435		13.9344	0.954897		13.9344	0.955623		13.9344	0.959978
14.0089	0.954816		14.0089	0.955699		14.0089	0.956415		14.0089	0.962096		14.0089	0.962377		14.0089	0.96052		14.0089	0.962862		14.0089	0.964171		14.0089	0.962367		14.0089	0.963508		14.0089	0.964844		14.0089	0.963753		14.0089	0.963545		14.0089	0.955015		14.0089	0.95546		14.0089	0.955427		14.0089	0.960525
14.0834	0.955798		14.0834	0.956099		14.0834	0.954802		14.0834	0.960854		14.0834	0.961339		14.0834	0.961036		14.0834	0.962844		14.0834	0.96323		14.0834	0.962407		14.0834	0.963845		14.0834	0.96473		14.0834	0.964024		14.0834	0.963457		14.0834	0.955558		14.0834	0.955925		14.0834	0.954427		14.0834	0.959513
14.158	0.95531		14.158	0.957428		14.158	0.955653		14.158	0.961382		14.158	0.961564		14.158	0.961515		14.158	0.96366		14.158	0.964474		14.158	0.963107		14.158	0.964562		14.158	0.965137		14.158	0.964185		14.158	0.964668		14.158	0.955111		14.158	0.955335		14.158	0.954063		14.158	0.958873
14.2325	0.954219		14.2325	0.957748		14.2325	0.95546		14.2325	0.962167		14.2325	0.961768		14.2325	0.960447		14.2325	0.96275		14.2325	0.961962		14.2325	0.963839		14.2325	0.964551		14.2325	0.964349		14.2325	0.962903		14.2325	0.963721		14.2325	0.95455		14.2325	0.955817		14.2325	0.9543		14.2325	0.958497
14.307	0.95346		14.307	0.95737		14.307	0.955146		14.307	0.962628		14.307	0.961417		14.307	0.960041		14.307	0.96225		14.307	0.963933		14.307	0.963971		14.307	0.965592		14.307	0.963623		14.307	0.964686		14.307	0.964165		14.307	0.954123		14.307	0.956019		14.307	0.954676		14.307	0.958379
14.3815	0.953647		14.3815	0.958333		14.3815	0.956208		14.3815	0.960564		14.3815	0.961847		14.3815	0.960888		14.3815	0.961542		14.3815	0.963476		14.3815	0.962766		14.3815	0.964707		14.3815	0.964316		14.3815	0.964203		14.3815	0.964336		14.3815	0.953285		14.3815	0.9546		14.3815	0.954994		14.3815	0.959669
14.456	0.952947		14.456	0.957144		14.456	0.956369		14.456	0.961227		14.456	0.962753		14.456	0.960662		14.456	0.960632		14.456	0.962543		14.456	0.963088		14.456	0.963977		14.456	0.964389		14.456	0.964772		14.456	0.964615		14.456	0.953557		14.456	0.95484		14.456	0.953752		14.456	0.959576
14.5305	0.953952		14.5305	0.957327		14.5305	0.956493		14.5305	0.960809		14.5305	0.963705		14.5305	0.96085		14.5305	0.960601		14.5305	0.96294		14.5305	0.963311		14.5305	0.964094		14.5305	0.964112		14.5305	0.964579		14.5305	0.964276		14.5305	0.954073		14.5305	0.955099		14.5305	0.953897		14.5305	0.959588
14.6051	0.953803		14.6051	0.955961		14.6051	0.95526		14.6051	0.961035		14.6051	0.96238		14.6051	0.960456		14.6051	0.960749		14.6051	0.962093		14.6051	0.964296		14.6051	0.964612		14.6051	0.963334		14.6051	0.964925		14.6051	0.964413		14.6051	0.953278		14.6051	0.954911		14.6051	0.954931		14.6051	0.958683
14.6796	0.954428		14.6796	0.956618		14.6796	0.954483		14.6796	0.960896		14.6796	0.963439		14.6796	0.961358		14.6796	0.96182		14.6796	0.962408		14.6796	0.963927		14.6796	0.964948		14.6796	0.964324		14.6796	0.964882		14.6796	0.963573		14.6796	0.954239		14.6796	0.955271		14.6796	0.953305		14.6796	0.959667
14.7541	0.954025		14.7541	0.956548		14.7541	0.954465		14.7541	0.962465		14.7541	0.963186		14.7541	0.960755		14.7541	0.96241		14.7541	0.961555		14.7541	0.963795		14.7541	0.964283		14.7541	0.963415		14.7541	0.964997		14.7541	0.962864		14.7541	0.954271		14.7541	0.955452		14.7541	0.953195		14.7541	0.95916
14.8286	0.954718		14.8286	0.956983		14.8286	0.95524		14.8286	0.962099		14.8286	0.963762		14.8286	0.961719		14.8286	0.962086		14.8286	0.961174		14.8286	0.965023		14.8286	0.964215		14.8286	0.963898		14.8286	0.965923		14.8286	0.963069		14.8286	0.953243		14.8286	0.954702		14.8286	0.953477		14.8286	0.959278
14.9031	0.954749		14.9031	0.957274		14.9031	0.954975		14.9031	0.961265		14.9031	0.962524		14.9031	0.961367		14.9031	0.961477		14.9031	0.960952		14.9031	0.963636		14.9031	0.963606		14.9031	0.96378		14.9031	0.964784		14.9031	0.963628		14.9031	0.953127		14.9031	0.954416		14.9031	0.954608		14.9031	0.9584
14.9776	0.954807		14.9776	0.955961		14.9776	0.95458		14.9776	0.961362		14.9776	0.962461		14.9776	0.960143		14.9776	0.962929		14.9776	0.961866		14.9776	0.964142		14.9776	0.963972		14.9776	0.963783		14.9776	0.964016		14.9776	0.964008		14.9776	0.953385		14.9776	0.954527		14.9776	0.954929		14.9776	0.957887
15.0522	0.954552		15.0522	0.955337		15.0522	0.954836		15.0522	0.9604		15.0522	0.96163		15.0522	0.960175		15.0522	0.962071		15.0522	0.961808		15.0522	0.962996		15.0522	0.962938		15.0522	0.964537		15.0522	0.964405		15.0522	0.964345		15.0522	0.952173		15.0522	0.95489		15.0522	0.95374		15.0522	0.957982
15.1267	0.954187		15.1267	0.954944		15.1267	0.9556		15.1267	0.959549		15.1267	0.961403		15.1267	0.961149		15.1267	0.960255		15.1267	0.961993		15.1267	0.963789		15.1267	0.963226		15.1267	0.964453		15.1267	0.964134		15.1267	0.964488		15.1267	0.952935		15.1267	0.955517		15.1267	0.953501		15.1267	0.958604
15.2012	0.953098		15.2012	0.95449		15.2012	0.956235		15.2012	0.958789		15.2012	0.96099		15.2012	0.959367		15.2012	0.960379		15.2012	0.96127		15.2012	0.963795		15.2012	0.9634		15.2012	0.964585		15.2012	0.964416		15.2012	0.965019		15.2012	0.953261		15.2012	0.954794		15.2012	0.954155		15.2012	0.95778
15.2757	0.954597		15.2757	0.955936		15.2757	0.955198		15.2757	0.959671		15.2757	0.960598		15.2757	0.959299		15.2757	0.96075		15.2757	0.961758		15.2757	0.963683		15.2757	0.962246		15.2757	0.964403		15.2757	0.96572		15.2757	0.965306		15.2757	0.952036		15.2757	0.954317		15.2757	0.954958		15.2757	0.956738
15.3502	0.953803		15.3502	0.955054		15.3502	0.954062		15.3502	0.959343		15.3502	0.960813		15.3502	0.959649		15.3502	0.960513		15.3502	0.962211		15.3502	0.962826		15.3502	0.963314		15.3502	0.963861		15.3502	0.96496		15.3502	0.965527		15.3502	0.951879		15.3502	0.955393		15.3502	0.955114		15.3502	0.956875
15.4247	0.953193		15.4247	0.955368		15.4247	0.955068		15.4247	0.959943		15.4247	0.961304		15.4247	0.960564		15.4247	0.961525		15.4247	0.961607		15.4247	0.962614		15.4247	0.963269		15.4247	0.964953		15.4247	0.963621		15.4247	0.965434		15.4247	0.952023		15.4247	0.955497		15.4247	0.9551		15.4247	0.95724
15.4992	0.953331		15.4992	0.956673		15.4992	0.954972		15.4992	0.959934		15.4992	0.961863		15.4992	0.960093		15.4992	0.961388		15.4992	0.962192		15.4992	0.961576		15.4992	0.963771		15.4992	0.963428		15.4992	0.963771		15.4992	0.966231		15.4992	0.952742		15.4992	0.955491		15.4992	0.955309		15.4992	0.955807
15.5738	0.953258		15.5738	0.955928		15.5738	0.955052		15.5738	0.961595		15.5738	0.961054		15.5738	0.959868		15.5738	0.961714		15.5738	0.961207		15.5738	0.96276		15.5738	0.963441		15.5738	0.962778		15.5738	0.964246		15.5738	0.964627		15.5738	0.95373		15.5738	0.954587		15.5738	0.954579		15.5738	0.956183
15.6483	0.952317		15.6483	0.955555		15.6483	0.954577		15.6483	0.96178		15.6483	0.960603		15.6483	0.96056		15.6483	0.96212		15.6483	0.961143		15.6483	0.962595		15.6483	0.962469		15.6483	0.96225		15.6483	0.962523		15.6483	0.963568		15.6483	0.954152		15.6483	0.954331		15.6483	0.953753		15.6483	0.955978
15.7228	0.952977		15.7228	0.955873		15.7228	0.953912		15.7228	0.962389		15.7228	0.960536		15.7228	0.961329		15.7228	0.96311		15.7228	0.96128		15.7228	0.961975		15.7228	0.963103		15.7228	0.96213		15.7228	0.963264		15.7228	0.962628		15.7228	0.953362		15.7228	0.955157		15.7228	0.954706		15.7228	0.956255
15.7973	0.952538		15.7973	0.954747		15.7973	0.953187		15.7973	0.961379		15.7973	0.960836		15.7973	0.961716		15.7973	0.963575		15.7973	0.961007		15.7973	0.962653		15.7973	0.963116		15.7973	0.963353		15.7973	0.963081		15.7973	0.962675		15.7973	0.954584		15.7973	0.954453		15.7973	0.955012		15.7973	0.95701
15.8718	0.95316		15.8718	0.9556		15.8718	0.953455		15.8718	0.960275		15.8718	0.959929		15.8718	0.960848		15.8718	0.962909		15.8718	0.962203		15.8718	0.962454		15.8718	0.961758		15.8718	0.963406		15.8718	0.962972		15.8718	0.962869		15.8718	0.955761		15.8718	0.954574		15.8718	0.954645		15.8718	0.957656
15.9463	0.95284		15.9463	0.955998		15.9463	0.952499		15.9463	0.959954		15.9463	0.961662		15.9463	0.961133		15.9463	0.96267		15.9463	0.961772		15.9463	0.963159		15.9463	0.961935		15.9463	0.963327		15.9463	0.964551		15.9463	0.963458		15.9463	0.95477		15.9463	0.955538		15.9463	0.955392		15.9463	0.957969
16.0209	0.952955		16.0209	0.955693		16.0209	0.953363		16.0209	0.959296		16.0209	0.961319		16.0209	0.960677		16.0209	0.961917		16.0209	0.960982		16.0209	0.963231		16.0209	0.962882		16.0209	0.962308		16.0209	0.963253		16.0209	0.963297		16.0209	0.954596		16.0209	0.954722		16.0209	0.954073		16.0209	0.957127
16.0954	0.951794		16.0954	0.956204		16.0954	0.954207		16.0954	0.960535		16.0954	0.962599		16.0954	0.959106		16.0954	0.960569		16.0954	0.961303		16.0954	0.962188		16.0954	0.961691		16.0954	0.964141		16.0954	0.963504		16.0954	0.963261		16.0954	0.954051		16.0954	0.955462		16.0954	0.954563		16.0954	0.958211
16.1699	0.952899		16.1699	0.955229		16.1699	0.953538		16.1699	0.959909		16.1699	0.962019		16.1699	0.95935		16.1699	0.961343		16.1699	0.960823		16.1699	0.963528		16.1699	0.962616		16.1699	0.964187		16.1699	0.963047		16.1699	0.963893		16.1699	0.953183		16.1699	0.95636		16.1699	0.95568		16.1699	0.958352
16.2444	0.952823		16.2444	0.954612		16.2444	0.954178		16.2444	0.960553		16.2444	0.960445		16.2444	0.96		16.2444	0.960632		16.2444	0.960737		16.2444	0.962328		16.2444	0.963732		16.2444	0.96425		16.2444	0.964476		16.2444	0.964047		16.2444	0.953491		16.2444	0.956305		16.2444	0.954543		16.2444	0.957638
16.3189	0.954197		16.3189	0.954188		16.3189	0.953611		16.3189	0.959892		16.3189	0.961426		16.3189	0.959907		16.3189	0.960093		16.3189	0.961314		16.3189	0.962382		16.3189	0.962367		16.3189	0.96414		16.3189	0.962985		16.3189	0.964246		16.3189	0.953549		16.3189	0.955629		16.3189	0.954811		16.3189	0.958488
16.3934	0.953266		16.3934	0.955365		16.3934	0.954098		16.3934	0.960538		16.3934	0.960404		16.3934	0.959495		16.3934	0.960553		16.3934	0.962332		16.3934	0.961731		16.3934	0.963795		16.3934	0.964107		16.3934	0.964252		16.3934	0.963485		16.3934	0.953046		16.3934	0.955091		16.3934	0.953114		16.3934	0.956377
16.4679	0.953831		16.4679	0.955741		16.4679	0.954375		16.4679	0.960878		16.4679	0.960439		16.4679	0.960793		16.4679	0.960883		16.4679	0.961512		16.4679	0.962416		16.4679	0.964902		16.4679	0.96488		16.4679	0.962151		16.4679	0.963247		16.4679	0.953246		16.4679	0.954918		16.4679	0.954948		16.4679	0.956707
16.5425	0.952156		16.5425	0.955301		16.5425	0.954328		16.5425	0.960376		16.5425	0.961091		16.5425	0.960499		16.5425	0.962108		16.5425	0.960837		16.5425	0.96203		16.5425	0.96442		16.5425	0.962934		16.5425	0.963224		16.5425	0.964418		16.5425	0.953169		16.5425	0.954927		16.5425	0.954956		16.5425	0.956669
16.617	0.953741		16.617	0.954959		16.617	0.954401		16.617	0.962211		16.617	0.960903		16.617	0.960769		16.617	0.96221		16.617	0.960583		16.617	0.961223		16.617	0.965324		16.617	0.963305		16.617	0.963869		16.617	0.964711		16.617	0.95358		16.617	0.954755		16.617	0.955359		16.617	0.956492
16.6915	0.954796		16.6915	0.954374		16.6915	0.95356		16.6915	0.961775		16.6915	0.9614		16.6915	0.959992		16.6915	0.96257		16.6915	0.96128		16.6915	0.961669		16.6915	0.964706		16.6915	0.962177		16.6915	0.963003		16.6915	0.964815		16.6915	0.952996		16.6915	0.955346		16.6915	0.954357		16.6915	0.956088
16.766	0.95467		16.766	0.954349		16.766	0.954943		16.766	0.962258		16.766	0.960874		16.766	0.961042		16.766	0.961922		16.766	0.961592		16.766	0.960894		16.766	0.963689		16.766	0.962255		16.766	0.963625		16.766	0.9648		16.766	0.95187		16.766	0.955298		16.766	0.953473		16.766	0.956242
16.8405	0.953706		16.8405	0.954573		16.8405	0.955481		16.8405	0.962554		16.8405	0.96095		16.8405	0.959948		16.8405	0.961365		16.8405	0.961077		16.8405	0.96115		16.8405	0.963379		16.8405	0.963934		16.8405	0.963072		16.8405	0.963926		16.8405	0.951816		16.8405	0.954579		16.8405	0.953192		16.8405	0.957187
16.915	0.954043		16.915	0.955836		16.915	0.955636		16.915	0.961926		16.915	0.960427		16.915	0.960645		16.915	0.960795		16.915	0.961173		16.915	0.962192		16.915	0.96308		16.915	0.963024		16.915	0.96424		16.915	0.964718		16.915	0.952827		16.915	0.952926		16.915	0.952602		16.915	0.957543
16.9896	0.954051		16.9896	0.95527		16.9896	0.955661		16.9896	0.962212		16.9896	0.961396		16.9896	0.960738		16.9896	0.961676		16.9896	0.960543		16.9896	0.962543		16.9896	0.963123		16.9896	0.963017		16.9896	0.963969		16.9896	0.964069		16.9896	0.953725		16.9896	0.953401		16.9896	0.952148		16.9896	0.957228
17.0641	0.953304		17.0641	0.954872		17.0641	0.9545		17.0641	0.962255		17.0641	0.961573		17.0641	0.959771		17.0641	0.96209		17.0641	0.960698		17.0641	0.962733		17.0641	0.963242		17.0641	0.962456		17.0641	0.963411		17.0641	0.96503		17.0641	0.953404		17.0641	0.952838		17.0641	0.952662		17.0641	0.95563
17.1386	0.953543		17.1386	0.955639		17.1386	0.9546		17.1386	0.961504		17.1386	0.960754		17.1386	0.960438		17.1386	0.96303		17.1386	0.960387		17.1386	0.962085		17.1386	0.962858		17.1386	0.962244		17.1386	0.963297		17.1386	0.964925		17.1386	0.953187		17.1386	0.954359		17.1386	0.953105		17.1386	0.955767
17.2131	0.953028		17.2131	0.956455		17.2131	0.954311		17.2131	0.962684		17.2131	0.960813		17.2131	0.959565		17.2131	0.961466		17.2131	0.960502		17.2131	0.962248		17.2131	0.962978		17.2131	0.962259		17.2131	0.963276		17.2131	0.964199		17.2131	0.953677		17.2131	0.954852		17.2131	0.952507		17.2131	0.955712
17.2876	0.9532		17.2876	0.954834		17.2876	0.954031		17.2876	0.961621		17.2876	0.959746		17.2876	0.960836		17.2876	0.961873		17.2876	0.960784		17.2876	0.962209		17.2876	0.962526		17.2876	0.961817		17.2876	0.965346		17.2876	0.963548		17.2876	0.952651		17.2876	0.954132		17.2876	0.953682		17.2876	0.956939
17.3621	0.952581		17.3621	0.956203		17.3621	0.954886		17.3621	0.962956		17.3621	0.961263		17.3621	0.960944		17.3621	0.961445		17.3621	0.961734		17.3621	0.962733		17.3621	0.96175		17.3621	0.962836		17.3621	0.965503		17.3621	0.963215		17.3621	0.951824		17.3621	0.953756		17.3621	0.955011		17.3621	0.95738
17.4366	0.953185		17.4366	0.956006		17.4366	0.955255		17.4366	0.962114		17.4366	0.961269		17.4366	0.959344		17.4366	0.960593		17.4366	0.961041		17.4366	0.961511		17.4366	0.961847		17.4366	0.962326		17.4366	0.964766		17.4366	0.963614		17.4366	0.951449		17.4366	0.953549		17.4366	0.954903		17.4366	0.958457
17.5112	0.953854		17.5112	0.955599		17.5112	0.954572		17.5112	0.961743		17.5112	0.961253		17.5112	0.959151		17.5112	0.960104		17.5112	0.961888		17.5112	0.962788		17.5112	0.961283		17.5112	0.96254		17.5112	0.964123		17.5112	0.96363		17.5112	0.951001		17.5112	0.954179		17.5112	0.953164		17.5112	0.95739
17.5857	0.954099		17.5857	0.956028		17.5857	0.9532		17.5857	0.961114		17.5857	0.960205		17.5857	0.960904		17.5857	0.959648		17.5857	0.960423		17.5857	0.961636		17.5857	0.96275		17.5857	0.963647		17.5857	0.964447		17.5857	0.963479		17.5857	0.952348		17.5857	0.953035		17.5857	0.952577		17.5857	0.957887
17.6602	0.953143		17.6602	0.955419		17.6602	0.953597		17.6602	0.961072		17.6602	0.960765		17.6602	0.95972		17.6602	0.959687		17.6602	0.960469		17.6602	0.961311		17.6602	0.961613		17.6602	0.964648		17.6602	0.964618		17.6602	0.963431		17.6602	0.951695		17.6602	0.953336		17.6602	0.953294		17.6602	0.958489
17.7347	0.95381		17.7347	0.955561		17.7347	0.954173		17.7347	0.960266		17.7347	0.961602		17.7347	0.958829		17.7347	0.959971		17.7347	0.961046		17.7347	0.962236		17.7347	0.962839		17.7347	0.963557		17.7347	0.964778		17.7347	0.962324		17.7347	0.951805		17.7347	0.953906		17.7347	0.953547		17.7347	0.957933
17.8092	0.954004		17.8092	0.954643		17.8092	0.955224		17.8092	0.960896		17.8092	0.961387		17.8092	0.958836		17.8092	0.961057		17.8092	0.960881		17.8092	0.961127		17.8092	0.962393		17.8092	0.964169		17.8092	0.964258		17.8092	0.96261		17.8092	0.952534		17.8092	0.954429		17.8092	0.953489		17.8092	0.958205
17.8837	0.952794		17.8837	0.95421		17.8837	0.955765		17.8837	0.961628		17.8837	0.960315		17.8837	0.959023		17.8837	0.96142		17.8837	0.960795		17.8837	0.963069		17.8837	0.96373		17.8837	0.964238		17.8837	0.963428		17.8837	0.962897		17.8837	0.952556		17.8837	0.954283		17.8837	0.953422		17.8837	0.958503
17.9583	0.952986		17.9583	0.953943		17.9583	0.954048		17.9583	0.961808		17.9583	0.959854		17.9583	0.959316		17.9583	0.961626		17.9583	0.960419		17.9583	0.963302		17.9583	0.963505		17.9583	0.963482		17.9583	0.964439		17.9583	0.96377		17.9583	0.952007		17.9583	0.954198		17.9583	0.954069		17.9583	0.959334
18.0328	0.953208		18.0328	0.954524		18.0328	0.955284		18.0328	0.960098		18.0328	0.959219		18.0328	0.958668		18.0328	0.961703		18.0328	0.962085		18.0328	0.963318		18.0328	0.963091		18.0328	0.963646		18.0328	0.964258		18.0328	0.963934		18.0328	0.953014		18.0328	0.955014		18.0328	0.95408		18.0328	0.958561
18.1073	0.952496		18.1073	0.953548		18.1073	0.955213		18.1073	0.959332		18.1073	0.958755		18.1073	0.959492		18.1073	0.961257		18.1073	0.961223		18.1073	0.963321		18.1073	0.96321		18.1073	0.962032		18.1073	0.964727		18.1073	0.964233		18.1073	0.953037		18.1073	0.955167		18.1073	0.954086		18.1073	0.958659
18.1818	0.954038		18.1818	0.95344		18.1818	0.955922		18.1818	0.960683		18.1818	0.958065		18.1818	0.959473		18.1818	0.960984		18.1818	0.962873		18.1818	0.963283		18.1818	0.963076		18.1818	0.962195		18.1818	0.965103		18.1818	0.964123		18.1818	0.952264		18.1818	0.954156		18.1818	0.95394		18.1818	0.958686
18.2563	0.953782		18.2563	0.953894		18.2563	0.955955		18.2563	0.961007		18.2563	0.958667		18.2563	0.959656		18.2563	0.961006		18.2563	0.962415		18.2563	0.963082		18.2563	0.962273		18.2563	0.963305		18.2563	0.965143		18.2563	0.962691		18.2563	0.951895		18.2563	0.953554		18.2563	0.953759		18.2563	0.957314
18.3308	0.954394		18.3308	0.954285		18.3308	0.956169		18.3308	0.961347		18.3308	0.958714		18.3308	0.961167		18.3308	0.959594		18.3308	0.962335		18.3308	0.962959		18.3308	0.961672		18.3308	0.964174		18.3308	0.963702		18.3308	0.962302		18.3308	0.951694		18.3308	0.952891		18.3308	0.953429		18.3308	0.956545
18.4054	0.953587		18.4054	0.955388		18.4054	0.955129		18.4054	0.961224		18.4054	0.95829		18.4054	0.960876		18.4054	0.959293		18.4054	0.961875		18.4054	0.962236		18.4054	0.962131		18.4054	0.963834		18.4054	0.964226		18.4054	0.962295		18.4054	0.950586		18.4054	0.953107		18.4054	0.953674		18.4054	0.956388
18.4799	0.953695		18.4799	0.955857		18.4799	0.954315		18.4799	0.959595		18.4799	0.958335		18.4799	0.961449		18.4799	0.959631		18.4799	0.962089		18.4799	0.962711		18.4799	0.962217		18.4799	0.962903		18.4799	0.964603		18.4799	0.962885		18.4799	0.951001		18.4799	0.953992		18.4799	0.952716		18.4799	0.957355
18.5544	0.953568		18.5544	0.95558		18.5544	0.953043		18.5544	0.959592		18.5544	0.958394		18.5544	0.960439		18.5544	0.959503		18.5544	0.962007		18.5544	0.961265		18.5544	0.962485		18.5544	0.963816		18.5544	0.963633		18.5544	0.96273		18.5544	0.952568		18.5544	0.953299		18.5544	0.953537		18.5544	0.957137
18.6289	0.954471		18.6289	0.956683		18.6289	0.953356		18.6289	0.959898		18.6289	0.958979		18.6289	0.961106		18.6289	0.959346		18.6289	0.96018		18.6289	0.960978		18.6289	0.962518		18.6289	0.964839		18.6289	0.963426		18.6289	0.963846		18.6289	0.951123		18.6289	0.952716		18.6289	0.953232		18.6289	0.956293
18.7034	0.952653		18.7034	0.957169		18.7034	0.95337		18.7034	0.960671		18.7034	0.958981		18.7034	0.959132		18.7034	0.960156		18.7034	0.960238		18.7034	0.96285		18.7034	0.962742		18.7034	0.96289		18.7034	0.964643		18.7034	0.962954		18.7034	0.952569		18.7034	0.952467		18.7034	0.953072		18.7034	0.957292
18.7779	0.951748		18.7779	0.95598		18.7779	0.953449		18.7779	0.961196		18.7779	0.959209		18.7779	0.95922		18.7779	0.960221		18.7779	0.961076		18.7779	0.962884		18.7779	0.962448		18.7779	0.96227		18.7779	0.965011		18.7779	0.962806		18.7779	0.95309		18.7779	0.952353		18.7779	0.953525		18.7779	0.955911
18.8524	0.953168		18.8524	0.95683		18.8524	0.954182		18.8524	0.960025		18.8524	0.958791		18.8524	0.958454		18.8524	0.960909		18.8524	0.960898		18.8524	0.963457		18.8524	0.962796		18.8524	0.961561		18.8524	0.965179		18.8524	0.963059		18.8524	0.95364		18.8524	0.952998		18.8524	0.952602		18.8524	0.955631
18.927	0.952148		18.927	0.955452		18.927	0.953671		18.927	0.960019		18.927	0.958878		18.927	0.959092		18.927	0.959177		18.927	0.960484		18.927	0.964093		18.927	0.962196		18.927	0.96332		18.927	0.963622		18.927	0.9634		18.927	0.953794		18.927	0.951599		18.927	0.953225		18.927	0.956087
19.0015	0.951684		19.0015	0.956116		19.0015	0.95351		19.0015	0.961093		19.0015	0.959414		19.0015	0.959176		19.0015	0.960141		19.0015	0.959404		19.0015	0.964018		19.0015	0.962746		19.0015	0.961982		19.0015	0.963426		19.0015	0.963946		19.0015	0.952579		19.0015	0.951982		19.0015	0.953771		19.0015	0.956088
19.076	0.951419		19.076	0.95641		19.076	0.954264		19.076	0.959904		19.076	0.960136		19.076	0.960091		19.076	0.959613		19.076	0.959479		19.076	0.964407		19.076	0.962329		19.076	0.962054		19.076	0.963541		19.076	0.963211		19.076	0.953593		19.076	0.952019		19.076	0.952908		19.076	0.957364
19.1505	0.952249		19.1505	0.956393		19.1505	0.954056		19.1505	0.95913		19.1505	0.960131		19.1505	0.959568		19.1505	0.959463		19.1505	0.96113		19.1505	0.963338		19.1505	0.96134		19.1505	0.962152		19.1505	0.962454		19.1505	0.962442		19.1505	0.953698		19.1505	0.953554		19.1505	0.95182		19.1505	0.956508
19.225	0.952623		19.225	0.955318		19.225	0.955368		19.225	0.958859		19.225	0.959238		19.225	0.958811		19.225	0.960695		19.225	0.960836		19.225	0.962743		19.225	0.962377		19.225	0.962875		19.225	0.962289		19.225	0.961851		19.225	0.953491		19.225	0.952751		19.225	0.952889		19.225	0.956096
19.2995	0.953553		19.2995	0.955179		19.2995	0.954617		19.2995	0.959405		19.2995	0.959199		19.2995	0.959687		19.2995	0.959968		19.2995	0.960648		19.2995	0.962751		19.2995	0.961835		19.2995	0.962428		19.2995	0.963008		19.2995	0.962576		19.2995	0.953416		19.2995	0.952149		19.2995	0.952577		19.2995	0.956388
19.3741	0.953346		19.3741	0.955729		19.3741	0.954902		19.3741	0.958803		19.3741	0.958801		19.3741	0.959777		19.3741	0.960216		19.3741	0.961256		19.3741	0.962154		19.3741	0.962475		19.3741	0.961872		19.3741	0.964171		19.3741	0.962592		19.3741	0.952671		19.3741	0.95246		19.3741	0.95341		19.3741	0.955526
19.4486	0.953741		19.4486	0.955901		19.4486	0.954974		19.4486	0.959757		19.4486	0.959651		19.4486	0.959173		19.4486	0.960038		19.4486	0.960605		19.4486	0.962509		19.4486	0.962069		19.4486	0.962842		19.4486	0.964821		19.4486	0.962863		19.4486	0.9529		19.4486	0.95476		19.4486	0.954015		19.4486	0.956412
19.5231	0.953695		19.5231	0.955984		19.5231	0.953671		19.5231	0.959435		19.5231	0.960311		19.5231	0.958686		19.5231	0.95969		19.5231	0.961003		19.5231	0.963		19.5231	0.962769		19.5231	0.963102		19.5231	0.964956		19.5231	0.962494		19.5231	0.951773		19.5231	0.954159		19.5231	0.953288		19.5231	0.956715
19.5976	0.95382		19.5976	0.956218		19.5976	0.953569		19.5976	0.959824		19.5976	0.959158		19.5976	0.957391		19.5976	0.959454		19.5976	0.960147		19.5976	0.963099		19.5976	0.962986		19.5976	0.963048		19.5976	0.963297		19.5976	0.962105		19.5976	0.951321		19.5976	0.95313		19.5976	0.952109		19.5976	0.956673
19.6721	0.954841		19.6721	0.956814		19.6721	0.95444		19.6721	0.960928		19.6721	0.959192		19.6721	0.9588		19.6721	0.959162		19.6721	0.960314		19.6721	0.963597		19.6721	0.963237		19.6721	0.963741		19.6721	0.962959		19.6721	0.962982		19.6721	0.951294		19.6721	0.9533		19.6721	0.952526		19.6721	0.954946
19.7466	0.952893		19.7466	0.956924		19.7466	0.953738		19.7466	0.96045		19.7466	0.959515		19.7466	0.959252		19.7466	0.959114		19.7466	0.960997		19.7466	0.962551		19.7466	0.963665		19.7466	0.963579		19.7466	0.963262		19.7466	0.963532		19.7466	0.951505		19.7466	0.952961		19.7466	0.953885		19.7466	0.954893
19.8211	0.953534		19.8211	0.956723		19.8211	0.953045		19.8211	0.960377		19.8211	0.959029		19.8211	0.958865		19.8211	0.959679		19.8211	0.96148		19.8211	0.962686		19.8211	0.963411		19.8211	0.963272		19.8211	0.96418		19.8211	0.962681		19.8211	0.950188		19.8211	0.953284		19.8211	0.953807		19.8211	0.954743
19.8957	0.95325		19.8957	0.957124		19.8957	0.954134		19.8957	0.961657		19.8957	0.959475		19.8957	0.959421		19.8957	0.95985		19.8957	0.960851		19.8957	0.962192		19.8957	0.963881		19.8957	0.962964		19.8957	0.963972		19.8957	0.963104		19.8957	0.950785		19.8957	0.953599		19.8957	0.952227		19.8957	0.954905
19.9702	0.952764		19.9702	0.956568		19.9702	0.954633		19.9702	0.9614		19.9702	0.959715		19.9702	0.958173		19.9702	0.960019		19.9702	0.960764		19.9702	0.961322		19.9702	0.962115		19.9702	0.962479		19.9702	0.964946		19.9702	0.963567		19.9702	0.951841		19.9702	0.953496		19.9702	0.952483		19.9702	0.954635
20.0447	0.952418		20.0447	0.955156		20.0447	0.952599		20.0447	0.962614		20.0447	0.959365		20.0447	0.959749		20.0447	0.960052		20.0447	0.961632		20.0447	0.961139		20.0447	0.961033		20.0447	0.961957		20.0447	0.965176		20.0447	0.962637		20.0447	0.951563		20.0447	0.953043		20.0447	0.951422		20.0447	0.956001
20.1192	0.953034		20.1192	0.955744		20.1192	0.953073		20.1192	0.962164		20.1192	0.958919		20.1192	0.958828		20.1192	0.960858		20.1192	0.9609		20.1192	0.96023		20.1192	0.961157		20.1192	0.961314		20.1192	0.964022		20.1192	0.962681		20.1192	0.951944		20.1192	0.953904		20.1192	0.952211		20.1192	0.957282
20.1937	0.952794		20.1937	0.95431		20.1937	0.953777		20.1937	0.961294		20.1937	0.958475		20.1937	0.959203		20.1937	0.960701		20.1937	0.961276		20.1937	0.960701		20.1937	0.961399		20.1937	0.961334		20.1937	0.964183		20.1937	0.96397		20.1937	0.953464		20.1937	0.95429		20.1937	0.952701		20.1937	0.956744
20.2682	0.95307		20.2682	0.954087		20.2682	0.954035		20.2682	0.960632		20.2682	0.959101		20.2682	0.959543		20.2682	0.961372		20.2682	0.959922		20.2682	0.961194		20.2682	0.963175		20.2682	0.960958		20.2682	0.964136		20.2682	0.9627		20.2682	0.954633		20.2682	0.953663		20.2682	0.952338		20.2682	0.956105
20.3428	0.951821		20.3428	0.955673		20.3428	0.95551		20.3428	0.959881		20.3428	0.95901		20.3428	0.960018		20.3428	0.960401		20.3428	0.960643		20.3428	0.961543		20.3428	0.962246		20.3428	0.962227		20.3428	0.964027		20.3428	0.962864		20.3428	0.954115		20.3428	0.954588		20.3428	0.951594		20.3428	0.955594
20.4173	0.952477		20.4173	0.955606		20.4173	0.955343		20.4173	0.959606		20.4173	0.959732		20.4173	0.960538		20.4173	0.960809		20.4173	0.960579		20.4173	0.961471		20.4173	0.963161		20.4173	0.96285		20.4173	0.962707		20.4173	0.961834		20.4173	0.953839		20.4173	0.953776		20.4173	0.950782		20.4173	0.956426
20.4918	0.953269		20.4918	0.955527		20.4918	0.955825		20.4918	0.958695		20.4918	0.959704		20.4918	0.96056		20.4918	0.96021		20.4918	0.960684		20.4918	0.960554		20.4918	0.963432		20.4918	0.963619		20.4918	0.962804		20.4918	0.961826		20.4918	0.952598		20.4918	0.952659		20.4918	0.95045		20.4918	0.956536
20.5663	0.953404		20.5663	0.955603		20.5663	0.955018		20.5663	0.959514		20.5663	0.95908		20.5663	0.960229		20.5663	0.958441		20.5663	0.959431		20.5663	0.96089		20.5663	0.964047		20.5663	0.962942		20.5663	0.963867		20.5663	0.963819		20.5663	0.952139		20.5663	0.952659		20.5663	0.952287		20.5663	0.95691
20.6408	0.953823		20.6408	0.955546		20.6408	0.954713		20.6408	0.960176		20.6408	0.95842		20.6408	0.95972		20.6408	0.959206		20.6408	0.960953		20.6408	0.961446		20.6408	0.962193		20.6408	0.962647		20.6408	0.964589		20.6408	0.963318		20.6408	0.953019		20.6408	0.953413		20.6408	0.952653		20.6408	0.957115
20.7153	0.954107		20.7153	0.955413		20.7153	0.953334		20.7153	0.959564		20.7153	0.958284		20.7153	0.958504		20.7153	0.959368		20.7153	0.959889		20.7153	0.962122		20.7153	0.963014		20.7153	0.964691		20.7153	0.965284		20.7153	0.964222		20.7153	0.952995		20.7153	0.953307		20.7153	0.95407		20.7153	0.957451
20.7899	0.953863		20.7899	0.954967		20.7899	0.953837		20.7899	0.961032		20.7899	0.957868		20.7899	0.959328		20.7899	0.959026		20.7899	0.960108		20.7899	0.961725		20.7899	0.963142		20.7899	0.964475		20.7899	0.964887		20.7899	0.962139		20.7899	0.951691		20.7899	0.952659		20.7899	0.953913		20.7899	0.955662
20.8644	0.95293		20.8644	0.954759		20.8644	0.954597		20.8644	0.960765		20.8644	0.959054		20.8644	0.958715		20.8644	0.958997		20.8644	0.961394		20.8644	0.96036		20.8644	0.962603		20.8644	0.964176		20.8644	0.964882		20.8644	0.962903		20.8644	0.951349		20.8644	0.952178		20.8644	0.952115		20.8644	0.956302
20.9389	0.953844		20.9389	0.955936		20.9389	0.955509		20.9389	0.961736		20.9389	0.959841		20.9389	0.958256		20.9389	0.96001		20.9389	0.962385		20.9389	0.960583		20.9389	0.963851		20.9389	0.964419		20.9389	0.964782		20.9389	0.96427		20.9389	0.950991		20.9389	0.952176		20.9389	0.952084		20.9389	0.95721
21.0134	0.959073		21.0134	0.961364		21.0134	0.959839		21.0134	0.965868		21.0134	0.965435		21.0134	0.963164		21.0134	0.96486		21.0134	0.966522		21.0134	0.966685		21.0134	0.969265		21.0134	0.968622		21.0134	0.96898		21.0134	0.968574		21.0134	0.955616		21.0134	0.958335		21.0134	0.958326		21.0134	0.962129
21.0879	0.962444		21.0879	0.964398		21.0879	0.962995		21.0879	0.968191		21.0879	0.96791		21.0879	0.966225		21.0879	0.967821		21.0879	0.970011		21.0879	0.969918		21.0879	0.970575		21.0879	0.970766		21.0879	0.971007		21.0879	0.97042		21.0879	0.959096		21.0879	0.960706		21.0879	0.960773		21.0879	0.964995
21.1624	0.963484		21.1624	0.964926		21.1624	0.964179		21.1624	0.970123		21.1624	0.968279		21.1624	0.968667		21.1624	0.969897		21.1624	0.970834		21.1624	0.971242		21.1624	0.972106		21.1624	0.97185		21.1624	0.97182		21.1624	0.970639		21.1624	0.960233		21.1624	0.962953		21.1624	0.963695		21.1624	0.965998
21.2369	0.96362		21.2369	0.966481		21.2369	0.964618		21.2369	0.972369		21.2369	0.969912		21.2369	0.970248		21.2369	0.970177		21.2369	0.972151		21.2369	0.972444		21.2369	0.971959		21.2369	0.97242		21.2369	0.973566		21.2369	0.97392		21.2369	0.962826		21.2369	0.964124		21.2369	0.96495		21.2369	0.966577
21.3115	0.964072		21.3115	0.967729		21.3115	0.965057		21.3115	0.972187		21.3115	0.971474		21.3115	0.971638		21.3115	0.97165		21.3115	0.973169		21.3115	0.973171		21.3115	0.971868		21.3115	0.974243		21.3115	0.973697		21.3115	0.975093		21.3115	0.964371		21.3115	0.966685		21.3115	0.965175		21.3115	0.966482
21.386	0.964549		21.386	0.967321		21.386	0.965409		21.386	0.972792		21.386	0.971956		21.386	0.97248		21.386	0.97292		21.386	0.974164		21.386	0.975278		21.386	0.972246		21.386	0.973757		21.386	0.974959		21.386	0.974717		21.386	0.965351		21.386	0.965688		21.386	0.965233		21.386	0.966999
21.4605	0.964978		21.4605	0.966894		21.4605	0.964988		21.4605	0.973556		21.4605	0.97347		21.4605	0.97338		21.4605	0.971961		21.4605	0.974356		21.4605	0.97511		21.4605	0.973789		21.4605	0.975276		21.4605	0.975785		21.4605	0.975387		21.4605	0.965069		21.4605	0.965434		21.4605	0.965814		21.4605	0.967581
21.535	0.964483		21.535	0.968088		21.535	0.966429		21.535	0.974733		21.535	0.973522		21.535	0.97391		21.535	0.972676		21.535	0.975249		21.535	0.975974		21.535	0.97556		21.535	0.975764		21.535	0.97772		21.535	0.97686		21.535	0.966755		21.535	0.967318		21.535	0.966368		21.535	0.970087
21.6095	0.966094		21.6095	0.968117		21.6095	0.967668		21.6095	0.974975		21.6095	0.975572		21.6095	0.97445		21.6095	0.973947		21.6095	0.975193		21.6095	0.975654		21.6095	0.975903		21.6095	0.977287		21.6095	0.977677		21.6095	0.976586		21.6095	0.967165		21.6095	0.967079		21.6095	0.966848		21.6095	0.969508
21.684	0.968185		21.684	0.970467		21.684	0.968173		21.684	0.97416		21.684	0.975376		21.684	0.974172		21.684	0.974871		21.684	0.974973		21.684	0.976748		21.684	0.975499		21.684	0.978002		21.684	0.978209		21.684	0.977291		21.684	0.967816		21.684	0.968849		21.684	0.968642		21.684	0.97115
