# Supplementary material for: Energy coupling and stoichiometry of Zn2+/H+ antiport by the prokaryotic cation diffusion facilitator YiiP
Source: eLife. 2023 Oct 31;12:RP87167. doi: 10.7554/eLife.87167 (PMC10617992; doi:10.7554/eLife.87167)
Supplement: Figure 4—figure supplement 1—source data 5. [file elife-87167-fig4-figsupp1-data5.xlsx]

## Sheet: RawData
NanoTemper Technologies	NanoTemper Technologies
MO.Affinity Analysis v2.3	MO.Affinity Analysis v2.3
Origin of exported data	Origin of exported data
Project Title:
Comment:
Project File Path:	C:\Users\nanotemper\Desktop\Adel\YiiP\site A pH\new analysis\site A pH.nta
Analysis-Set Name:	Analysis-Set #1
Exported from:	MST Traces
Exported on:	2023-09-25 16:11:00
Analysis Settings	Analysis Settings
Type of Analysis:	MST
Evaluation strategy:	Manual
Cold Region Start:	-1
Cold Region End:	0
Hot Region Start:	14
Hot Region End:	15
Sample Information	Sample Information		Sample Information	Sample Information		Sample Information	Sample Information		Sample Information	Sample Information		Sample Information	Sample Information		Sample Information	Sample Information		Sample Information	Sample Information		Sample Information	Sample Information		Sample Information	Sample Information		Sample Information	Sample Information		Sample Information	Sample Information		Sample Information	Sample Information		Sample Information	Sample Information		Sample Information	Sample Information		Sample Information	Sample Information		Sample Information	Sample Information		Sample Information	Sample Information
Merge-Set Name:	ph 6.0 negative contrl with magenisum (#30)		Merge-Set Name:	ph 6.0 negative contrl with magenisum (#30)		Merge-Set Name:	ph 6.0 negative contrl with magenisum (#30)		Merge-Set Name:	ph 6.0 negative contrl with magenisum (#30)		Merge-Set Name:	ph 6.0 negative contrl with magenisum (#30)		Merge-Set Name:	ph 6.0 negative contrl with magenisum (#30)		Merge-Set Name:	ph 6.0 negative contrl with magenisum (#30)		Merge-Set Name:	ph 6.0 negative contrl with magenisum (#30)		Merge-Set Name:	ph 6.0 negative contrl with magenisum (#30)		Merge-Set Name:	ph 6.0 negative contrl with magenisum (#30)		Merge-Set Name:	ph 6.0 negative contrl with magenisum (#30)		Merge-Set Name:	ph 6.0 negative contrl with magenisum (#30)		Merge-Set Name:	ph 6.0 negative contrl with magenisum (#30)		Merge-Set Name:	ph 6.0 negative contrl with magenisum (#30)		Merge-Set Name:	ph 6.0 negative contrl with magenisum (#30)		Merge-Set Name:	ph 6.0 negative contrl with magenisum (#30)		Merge-Set Name:	ph 6.0 negative contrl with magenisum (#30)
Run Name:	MyTarget_60_MyLigand (#30)		Run Name:	MyTarget_60_MyLigand (#30)		Run Name:	MyTarget_60_MyLigand (#30)		Run Name:	MyTarget_60_MyLigand (#30)		Run Name:	MyTarget_60_MyLigand (#30)		Run Name:	MyTarget_60_MyLigand (#30)		Run Name:	MyTarget_60_MyLigand (#30)		Run Name:	MyTarget_60_MyLigand (#30)		Run Name:	MyTarget_60_MyLigand (#30)		Run Name:	MyTarget_60_MyLigand (#30)		Run Name:	MyTarget_60_MyLigand (#30)		Run Name:	MyTarget_60_MyLigand (#30)		Run Name:	MyTarget_60_MyLigand (#30)		Run Name:	MyTarget_60_MyLigand (#30)		Run Name:	MyTarget_60_MyLigand (#30)		Run Name:	MyTarget_60_MyLigand (#30)		Run Name:	MyTarget_60_MyLigand (#31)
Date of Measurement:	2022-04-04 13:08:13		Date of Measurement:	2022-04-04 13:08:54		Date of Measurement:	2022-04-04 13:09:35		Date of Measurement:	2022-04-04 13:10:16		Date of Measurement:	2022-04-04 13:10:56		Date of Measurement:	2022-04-04 13:11:37		Date of Measurement:	2022-04-04 13:12:18		Date of Measurement:	2022-04-04 13:12:59		Date of Measurement:	2022-04-04 13:13:39		Date of Measurement:	2022-04-04 13:14:20		Date of Measurement:	2022-04-04 13:15:01		Date of Measurement:	2022-04-04 13:15:42		Date of Measurement:	2022-04-04 13:16:23		Date of Measurement:	2022-04-04 13:17:04		Date of Measurement:	2022-04-04 13:17:45		Date of Measurement:	2022-04-04 13:18:26		Date of Measurement:	2022-04-04 13:29:40
Capillary Type:	Unspecified container/capillary type		Capillary Type:	Unspecified container/capillary type		Capillary Type:	Unspecified container/capillary type		Capillary Type:	Unspecified container/capillary type		Capillary Type:	Unspecified container/capillary type		Capillary Type:	Unspecified container/capillary type		Capillary Type:	Unspecified container/capillary type		Capillary Type:	Unspecified container/capillary type		Capillary Type:	Unspecified container/capillary type		Capillary Type:	Unspecified container/capillary type		Capillary Type:	Unspecified container/capillary type		Capillary Type:	Unspecified container/capillary type		Capillary Type:	Unspecified container/capillary type		Capillary Type:	Unspecified container/capillary type		Capillary Type:	Unspecified container/capillary type		Capillary Type:	Unspecified container/capillary type		Capillary Type:	Unspecified container/capillary type
Capillary Position:	1		Capillary Position:	2		Capillary Position:	3		Capillary Position:	4		Capillary Position:	5		Capillary Position:	6		Capillary Position:	7		Capillary Position:	8		Capillary Position:	9		Capillary Position:	10		Capillary Position:	11		Capillary Position:	12		Capillary Position:	13		Capillary Position:	14		Capillary Position:	15		Capillary Position:	16		Capillary Position:	1
Ligand:	MyLigand		Ligand:	MyLigand		Ligand:	MyLigand		Ligand:	MyLigand		Ligand:	MyLigand		Ligand:	MyLigand		Ligand:	MyLigand		Ligand:	MyLigand		Ligand:	MyLigand		Ligand:	MyLigand		Ligand:	MyLigand		Ligand:	MyLigand		Ligand:	MyLigand		Ligand:	MyLigand		Ligand:	MyLigand		Ligand:	MyLigand		Ligand:	MyLigand
Ligand Concentration:	0.002		Ligand Concentration:	0.000760926		Ligand Concentration:	0.000170366		Ligand Concentration:	2.3319e-05		Ligand Concentration:	7.219e-06		Ligand Concentration:	3.006e-06		Ligand Concentration:	1.385e-06		Ligand Concentration:	6.67e-07		Ligand Concentration:	3.27e-07		Ligand Concentration:	1.62e-07		Ligand Concentration:	8e-08		Ligand Concentration:	4e-08		Ligand Concentration:	2e-08		Ligand Concentration:	1e-08		Ligand Concentration:	5e-09		Ligand Concentration:	2.5e-09		Ligand Concentration:	0.002
Target:	MyTarget		Target:	MyTarget		Target:	MyTarget		Target:	MyTarget		Target:	MyTarget		Target:	MyTarget		Target:	MyTarget		Target:	MyTarget		Target:	MyTarget		Target:	MyTarget		Target:	MyTarget		Target:	MyTarget		Target:	MyTarget		Target:	MyTarget		Target:	MyTarget		Target:	MyTarget		Target:	MyTarget
TargetConcentration:	6e-08		TargetConcentration:	6e-08		TargetConcentration:	6e-08		TargetConcentration:	6e-08		TargetConcentration:	6e-08		TargetConcentration:	6e-08		TargetConcentration:	6e-08		TargetConcentration:	6e-08		TargetConcentration:	6e-08		TargetConcentration:	6e-08		TargetConcentration:	6e-08		TargetConcentration:	6e-08		TargetConcentration:	6e-08		TargetConcentration:	6e-08		TargetConcentration:	6e-08		TargetConcentration:	6e-08		TargetConcentration:	6e-08
Measurement Settings	Measurement Settings		Measurement Settings	Measurement Settings		Measurement Settings	Measurement Settings		Measurement Settings	Measurement Settings		Measurement Settings	Measurement Settings		Measurement Settings	Measurement Settings		Measurement Settings	Measurement Settings		Measurement Settings	Measurement Settings		Measurement Settings	Measurement Settings		Measurement Settings	Measurement Settings		Measurement Settings	Measurement Settings		Measurement Settings	Measurement Settings		Measurement Settings	Measurement Settings		Measurement Settings	Measurement Settings		Measurement Settings	Measurement Settings		Measurement Settings	Measurement Settings		Measurement Settings	Measurement Settings
MST-Power:	Medium		MST-Power:	Medium		MST-Power:	Medium		MST-Power:	Medium		MST-Power:	Medium		MST-Power:	Medium		MST-Power:	Medium		MST-Power:	Medium		MST-Power:	Medium		MST-Power:	Medium		MST-Power:	Medium		MST-Power:	Medium		MST-Power:	Medium		MST-Power:	Medium		MST-Power:	Medium		MST-Power:	Medium		MST-Power:	Medium
Excitation-Power:	20		Excitation-Power:	20		Excitation-Power:	20		Excitation-Power:	20		Excitation-Power:	20		Excitation-Power:	20		Excitation-Power:	20		Excitation-Power:	20		Excitation-Power:	20		Excitation-Power:	20		Excitation-Power:	20		Excitation-Power:	20		Excitation-Power:	20		Excitation-Power:	20		Excitation-Power:	20		Excitation-Power:	20		Excitation-Power:	20
Excitation type:	Nano - BLUE		Excitation type:	Nano - BLUE		Excitation type:	Nano - BLUE		Excitation type:	Nano - BLUE		Excitation type:	Nano - BLUE		Excitation type:	Nano - BLUE		Excitation type:	Nano - BLUE		Excitation type:	Nano - BLUE		Excitation type:	Nano - BLUE		Excitation type:	Nano - BLUE		Excitation type:	Nano - BLUE		Excitation type:	Nano - BLUE		Excitation type:	Nano - BLUE		Excitation type:	Nano - BLUE		Excitation type:	Nano - BLUE		Excitation type:	Nano - BLUE		Excitation type:	Nano - BLUE
Thermostat Setpoint:	37		Thermostat Setpoint:	37		Thermostat Setpoint:	37		Thermostat Setpoint:	37		Thermostat Setpoint:	37		Thermostat Setpoint:	37		Thermostat Setpoint:	37		Thermostat Setpoint:	37		Thermostat Setpoint:	37		Thermostat Setpoint:	37		Thermostat Setpoint:	37		Thermostat Setpoint:	37		Thermostat Setpoint:	37		Thermostat Setpoint:	37		Thermostat Setpoint:	37		Thermostat Setpoint:	37		Thermostat Setpoint:	37
Included	Included		Included	Included		Included	Included		Included	Included		Included	Included		Included	Included		Included	Included		Included	Included		Included	Included		Included	Included		Included	Included		Included	Included		Included	Included		Included	Included		Included	Included		Included	Included		Included	Included
Time [s]	Normalized Fluorescence [-]		Time [s]	Normalized Fluorescence [-]		Time [s]	Normalized Fluorescence [-]		Time [s]	Normalized Fluorescence [-]		Time [s]	Normalized Fluorescence [-]		Time [s]	Normalized Fluorescence [-]		Time [s]	Normalized Fluorescence [-]		Time [s]	Normalized Fluorescence [-]		Time [s]	Normalized Fluorescence [-]		Time [s]	Normalized Fluorescence [-]		Time [s]	Normalized Fluorescence [-]		Time [s]	Normalized Fluorescence [-]		Time [s]	Normalized Fluorescence [-]		Time [s]	Normalized Fluorescence [-]		Time [s]	Normalized Fluorescence [-]		Time [s]	Normalized Fluorescence [-]		Time [s]	Normalized Fluorescence [-]
-3.57675	0.999835		-3.57675	1.00013		-3.57675	0.998569		-3.57675	0.998643		-3.57675	0.998185		-3.57675	0.999008		-3.57675	0.998424		-3.57675	1.00126		-3.57675	0.999753		-3.57675	0.997892		-3.57675	0.999185		-3.57675	0.999745		-3.57675	0.99928		-3.57675	0.998183		-3.57675	0.998187		-3.57675	1.00055		-3.57675	0.999129
-3.50223	0.99904		-3.50223	0.999056		-3.50223	0.999749		-3.50223	0.999838		-3.50223	0.998827		-3.50223	0.999256		-3.50223	0.998577		-3.50223	1.00184		-3.50223	0.999371		-3.50223	0.998957		-3.50223	0.999856		-3.50223	1.00043		-3.50223	0.9993		-3.50223	0.999166		-3.50223	0.999041		-3.50223	0.999909		-3.50223	1.00035
-3.42772	0.999057		-3.42772	0.998511		-3.42772	1.00081		-3.42772	1.00044		-3.42772	1.00008		-3.42772	1.0008		-3.42772	0.999268		-3.42772	1.00237		-3.42772	0.999423		-3.42772	0.998763		-3.42772	1.00017		-3.42772	1.00137		-3.42772	0.999574		-3.42772	0.999296		-3.42772	0.999357		-3.42772	1.00009		-3.42772	1.00067
-3.3532	0.999283		-3.3532	0.998599		-3.3532	1.00139		-3.3532	0.999659		-3.3532	1.00112		-3.3532	1.00089		-3.3532	1.00057		-3.3532	1.00272		-3.3532	1.00029		-3.3532	0.998762		-3.3532	0.998874		-3.3532	1.00085		-3.3532	0.999285		-3.3532	1.00042		-3.3532	1.00002		-3.3532	1.00006		-3.3532	1.00086
-3.27869	0.998872		-3.27869	1.00033		-3.27869	1.00059		-3.27869	1.00047		-3.27869	1.00043		-3.27869	1.0015		-3.27869	1.00089		-3.27869	1.00198		-3.27869	1.00033		-3.27869	0.999729		-3.27869	0.999446		-3.27869	0.999804		-3.27869	0.999729		-3.27869	1.00031		-3.27869	0.999926		-3.27869	0.999505		-3.27869	1.00109
-3.20417	0.999403		-3.20417	1.00022		-3.20417	1.00001		-3.20417	0.999555		-3.20417	1.00059		-3.20417	1.00013		-3.20417	1.00052		-3.20417	1.00096		-3.20417	1.00088		-3.20417	1.00047		-3.20417	1.00011		-3.20417	0.999017		-3.20417	0.999371		-3.20417	1.00043		-3.20417	0.998941		-3.20417	0.999468		-3.20417	1.00086
-3.12966	0.99949		-3.12966	0.999997		-3.12966	0.999907		-3.12966	0.999374		-3.12966	0.999806		-3.12966	0.999696		-3.12966	1.00056		-3.12966	1.00177		-3.12966	1.00014		-3.12966	1.00066		-3.12966	0.999852		-3.12966	0.998627		-3.12966	1.00048		-3.12966	1.00095		-3.12966	0.999122		-3.12966	0.999428		-3.12966	1.00105
-3.05514	0.998922		-3.05514	1.00005		-3.05514	0.999642		-3.05514	1.00052		-3.05514	1.00022		-3.05514	0.999767		-3.05514	0.999614		-3.05514	1.00142		-3.05514	1.00106		-3.05514	1.00035		-3.05514	0.999638		-3.05514	0.997912		-3.05514	1.00055		-3.05514	1.0008		-3.05514	0.998962		-3.05514	1.00036		-3.05514	1.00015
-2.98062	1.00015		-2.98062	1		-2.98062	1.00061		-2.98062	1.00035		-2.98062	0.999425		-2.98062	1.00018		-2.98062	0.999681		-2.98062	1.00026		-2.98062	1.0007		-2.98062	0.999848		-2.98062	1.00133		-2.98062	0.999115		-2.98062	1.00094		-2.98062	1.00042		-2.98062	0.99956		-2.98062	1.00088		-2.98062	0.999934
-2.90611	1.00069		-2.90611	1.00072		-2.90611	1.00022		-2.90611	1.00002		-2.90611	0.999755		-2.90611	0.999548		-2.90611	1.0003		-2.90611	0.999387		-2.90611	1.00025		-2.90611	0.999869		-2.90611	1.00018		-2.90611	0.9997		-2.90611	1.00126		-2.90611	1.00089		-2.90611	0.999892		-2.90611	1.00174		-2.90611	0.999598
-2.83159	1.00077		-2.83159	1.00113		-2.83159	0.999056		-2.83159	0.999538		-2.83159	0.999711		-2.83159	0.99893		-2.83159	1.00043		-2.83159	0.999318		-2.83159	1.00085		-2.83159	0.999351		-2.83159	0.999462		-2.83159	0.998835		-2.83159	1.00074		-2.83159	1.00076		-2.83159	1.0003		-2.83159	1.00039		-2.83159	0.999287
-2.75708	1.00112		-2.75708	1.00135		-2.75708	0.998706		-2.75708	0.999366		-2.75708	0.99989		-2.75708	0.999407		-2.75708	1.00057		-2.75708	0.998883		-2.75708	0.999975		-2.75708	0.999442		-2.75708	0.999202		-2.75708	0.999007		-2.75708	1.00057		-2.75708	1.00032		-2.75708	1.00012		-2.75708	1.00082		-2.75708	0.999494
-2.68256	1.00094		-2.68256	0.999973		-2.68256	0.998017		-2.68256	0.999125		-2.68256	1.00078		-2.68256	1.00009		-2.68256	1.00135		-2.68256	0.998382		-2.68256	0.999857		-2.68256	1.00003		-2.68256	0.999909		-2.68256	0.998679		-2.68256	1.00019		-2.68256	0.999545		-2.68256	0.999516		-2.68256	1.00043		-2.68256	0.999589
-2.60805	1.00012		-2.60805	0.9992		-2.60805	0.997965		-2.60805	0.999373		-2.60805	1.00079		-2.60805	0.99968		-2.60805	1.00042		-2.60805	0.998421		-2.60805	0.999665		-2.60805	1.00099		-2.60805	0.999376		-2.60805	0.999326		-2.60805	1.00072		-2.60805	0.998865		-2.60805	1.00037		-2.60805	1.00154		-2.60805	0.999824
-2.53353	0.999201		-2.53353	0.998905		-2.53353	0.997564		-2.53353	1.00013		-2.53353	1.00068		-2.53353	1.0004		-2.53353	1.00055		-2.53353	0.998191		-2.53353	0.999615		-2.53353	1.00141		-2.53353	0.998854		-2.53353	0.999231		-2.53353	1.00168		-2.53353	0.999642		-2.53353	1.00082		-2.53353	1.00197		-2.53353	0.999399
-2.45901	0.998724		-2.45901	1.00003		-2.45901	0.997717		-2.45901	1.00003		-2.45901	1.00005		-2.45901	1.00077		-2.45901	1.00188		-2.45901	0.997912		-2.45901	1.00044		-2.45901	1.00097		-2.45901	0.999386		-2.45901	0.998851		-2.45901	1.00106		-2.45901	1.00074		-2.45901	1.00146		-2.45901	1.00263		-2.45901	0.999383
-2.3845	0.999925		-2.3845	1.00031		-2.3845	0.999088		-2.3845	1.00097		-2.3845	1.00049		-2.3845	1.00209		-2.3845	1.00221		-2.3845	0.998096		-2.3845	1.00038		-2.3845	1.00041		-2.3845	1.00017		-2.3845	0.999646		-2.3845	1.00186		-2.3845	1.00068		-2.3845	1.00021		-2.3845	1.00247		-2.3845	0.998724
-2.30998	1.00045		-2.30998	0.999705		-2.30998	0.999438		-2.30998	1.0014		-2.30998	1.00127		-2.30998	1.00197		-2.30998	1.00101		-2.30998	0.997926		-2.30998	1.00124		-2.30998	1.00123		-2.30998	1.00039		-2.30998	1.00038		-2.30998	1.00044		-2.30998	1.0006		-2.30998	1.00046		-2.30998	1.00216		-2.30998	0.999119
-2.23547	1.00125		-2.23547	1.00044		-2.23547	1.00036		-2.23547	1.00093		-2.23547	0.999465		-2.23547	1.00081		-2.23547	1.00069		-2.23547	0.999134		-2.23547	1.0008		-2.23547	1.00015		-2.23547	1.00004		-2.23547	1.00072		-2.23547	0.999501		-2.23547	1.00094		-2.23547	1.00084		-2.23547	1.00098		-2.23547	1.00003
-2.16095	1.00112		-2.16095	0.999127		-2.16095	1.00053		-2.16095	1.00042		-2.16095	0.999386		-2.16095	0.999999		-2.16095	1.00085		-2.16095	0.998885		-2.16095	1.00084		-2.16095	1.00092		-2.16095	1.00099		-2.16095	1.00118		-2.16095	0.999818		-2.16095	1.00004		-2.16095	1.00102		-2.16095	1.00061		-2.16095	0.999705
-2.08644	1.00164		-2.08644	0.999989		-2.08644	1.00075		-2.08644	1.00139		-2.08644	0.999689		-2.08644	0.999479		-2.08644	1.00062		-2.08644	1.00014		-2.08644	1.00071		-2.08644	1.00139		-2.08644	1.00156		-2.08644	1.00207		-2.08644	1.00136		-2.08644	1.00022		-2.08644	0.99953		-2.08644	1.00003		-2.08644	1.00052
-2.01192	1.00091		-2.01192	0.999771		-2.01192	1.0013		-2.01192	0.999939		-2.01192	0.999431		-2.01192	0.999603		-2.01192	1.00195		-2.01192	1.00078		-2.01192	0.999847		-2.01192	1.00143		-2.01192	1.00197		-2.01192	1.00194		-2.01192	1.00158		-2.01192	0.999916		-2.01192	0.998902		-2.01192	1.00014		-2.01192	0.9999
-1.93741	1.0005		-1.93741	0.998731		-1.93741	1.00143		-1.93741	0.9994		-1.93741	0.998877		-1.93741	1.00098		-1.93741	1.00167		-1.93741	0.999364		-1.93741	1.00001		-1.93741	1.00039		-1.93741	1.00147		-1.93741	1.00146		-1.93741	1.00235		-1.93741	1.00076		-1.93741	0.998409		-1.93741	0.999442		-1.93741	1.00022
-1.86289	1.00101		-1.86289	0.997947		-1.86289	1.00113		-1.86289	0.998973		-1.86289	0.998749		-1.86289	1.00157		-1.86289	1.00089		-1.86289	0.999141		-1.86289	1.00081		-1.86289	1.00061		-1.86289	1.00067		-1.86289	1.00049		-1.86289	1.0011		-1.86289	1.00071		-1.86289	0.999545		-1.86289	1.00121		-1.86289	1.00006
-1.78837	0.999878		-1.78837	0.998459		-1.78837	0.999693		-1.78837	0.998885		-1.78837	0.999861		-1.78837	1.00148		-1.78837	1.00075		-1.78837	0.999407		-1.78837	1.00159		-1.78837	0.999931		-1.78837	0.999691		-1.78837	0.999844		-1.78837	1.00016		-1.78837	1.00102		-1.78837	0.99997		-1.78837	1.00056		-1.78837	1.0004
-1.71386	0.998767		-1.71386	0.999284		-1.71386	0.99878		-1.71386	0.999842		-1.71386	0.998724		-1.71386	1.00179		-1.71386	1.0023		-1.71386	0.998724		-1.71386	1.00234		-1.71386	0.99981		-1.71386	0.999734		-1.71386	0.999548		-1.71386	1.00003		-1.71386	1.00052		-1.71386	0.999544		-1.71386	1		-1.71386	0.999959
-1.63934	0.99837		-1.63934	0.999875		-1.63934	1.00009		-1.63934	1.00064		-1.63934	0.998705		-1.63934	1.00144		-1.63934	1.00245		-1.63934	0.999788		-1.63934	1.00247		-1.63934	1.00012		-1.63934	0.999722		-1.63934	1.00002		-1.63934	0.999736		-1.63934	1.00129		-1.63934	0.999009		-1.63934	1.00011		-1.63934	0.999147
-1.56483	0.99875		-1.56483	1.00015		-1.56483	1.00027		-1.56483	0.999863		-1.56483	0.998876		-1.56483	1.00229		-1.56483	1.00251		-1.56483	0.998878		-1.56483	1.00149		-1.56483	1.00118		-1.56483	1.00045		-1.56483	0.999331		-1.56483	1.00142		-1.56483	1.00083		-1.56483	0.999673		-1.56483	1.00172		-1.56483	0.999407
-1.49031	0.999435		-1.49031	1.00048		-1.49031	1.00035		-1.49031	0.999464		-1.49031	0.999669		-1.49031	1.00238		-1.49031	1.00165		-1.49031	0.998923		-1.49031	1.00161		-1.49031	1.00171		-1.49031	1.00043		-1.49031	0.999043		-1.49031	1.00178		-1.49031	1.00038		-1.49031	0.99901		-1.49031	1.0024		-1.49031	0.998952
-1.4158	1.00028		-1.4158	0.999954		-1.4158	0.999944		-1.4158	1.00039		-1.4158	0.998975		-1.4158	1.00284		-1.4158	1.00153		-1.4158	0.999807		-1.4158	1.00098		-1.4158	1.00166		-1.4158	1.00131		-1.4158	0.999625		-1.4158	1.00186		-1.4158	1.00094		-1.4158	0.999792		-1.4158	1.00139		-1.4158	0.998685
-1.34128	0.999549		-1.34128	0.999017		-1.34128	0.998769		-1.34128	0.999785		-1.34128	0.999069		-1.34128	1.00194		-1.34128	1.00264		-1.34128	0.999147		-1.34128	1.00058		-1.34128	1.00204		-1.34128	1.00073		-1.34128	0.999128		-1.34128	1.00261		-1.34128	1.0013		-1.34128	0.999109		-1.34128	1.00151		-1.34128	0.999156
-1.26677	0.999864		-1.26677	0.998223		-1.26677	1.00004		-1.26677	1.00064		-1.26677	0.998255		-1.26677	1.00103		-1.26677	1.00293		-1.26677	0.999211		-1.26677	1.00098		-1.26677	1.00073		-1.26677	1.00098		-1.26677	0.999189		-1.26677	1.00286		-1.26677	1.00128		-1.26677	0.998344		-1.26677	1.00207		-1.26677	0.998495
-1.19225	0.999129		-1.19225	0.998542		-1.19225	1.00012		-1.19225	1.00136		-1.19225	1.00026		-1.19225	1.00027		-1.19225	1.00133		-1.19225	1.00014		-1.19225	1.00197		-1.19225	0.999535		-1.19225	1.00032		-1.19225	0.999779		-1.19225	1.00156		-1.19225	1.00021		-1.19225	0.99855		-1.19225	1.00271		-1.19225	0.998566
-1.11773	1.00011		-1.11773	0.999081		-1.11773	0.999334		-1.11773	1.00046		-1.11773	1.00076		-1.11773	1.0008		-1.11773	1.00194		-1.11773	0.999443		-1.11773	1.00246		-1.11773	0.999844		-1.11773	0.99897		-1.11773	0.999198		-1.11773	1.0022		-1.11773	1.00083		-1.11773	0.999544		-1.11773	1.00285		-1.11773	0.998938
-1.04322	0.99927		-1.04322	0.998515		-1.04322	0.999838		-1.04322	1.00095		-1.04322	1.00184		-1.04322	1.0005		-1.04322	1.00276		-1.04322	0.999126		-1.04322	1.00248		-1.04322	1.00052		-1.04322	0.998853		-1.04322	0.999949		-1.04322	1.00171		-1.04322	0.999379		-1.04322	0.999731		-1.04322	1.00214		-1.04322	1.00017
-0.968703	0.998203		-0.968703	0.998465		-0.968703	0.999321		-0.968703	1.00025		-0.968703	1.00128		-0.968703	1.00128		-0.968703	1.00306		-0.968703	1.00077		-0.968703	1.00291		-0.968703	0.999838		-0.968703	0.998849		-0.968703	0.999503		-0.968703	1.0017		-0.968703	0.999029		-0.968703	0.999502		-0.968703	1.00185		-0.968703	0.99988
-0.894187	0.999218		-0.894187	0.999002		-0.894187	0.998932		-0.894187	1.00078		-0.894187	1.0019		-0.894187	1.0016		-0.894187	1.00291		-0.894187	1.00065		-0.894187	1.00253		-0.894187	1.00011		-0.894187	0.999995		-0.894187	0.998735		-0.894187	1.00161		-0.894187	0.998914		-0.894187	0.999781		-0.894187	1.00161		-0.894187	1.00072
-0.819672	0.999359		-0.819672	0.999761		-0.819672	0.999589		-0.819672	1.00086		-0.819672	1.00155		-0.819672	1.001		-0.819672	1.00254		-0.819672	0.999993		-0.819672	1.00132		-0.819672	0.999749		-0.819672	0.999918		-0.819672	0.999103		-0.819672	1.0011		-0.819672	0.999625		-0.819672	1.00025		-0.819672	1.00225		-0.819672	0.999833
-0.745156	0.999607		-0.745156	0.999144		-0.745156	0.999948		-0.745156	1.00189		-0.745156	1.00067		-0.745156	1.00025		-0.745156	1.00294		-0.745156	0.999315		-0.745156	1.00099		-0.745156	0.999531		-0.745156	0.99967		-0.745156	0.999159		-0.745156	1.00129		-0.745156	1.00032		-0.745156	0.999858		-0.745156	1.00176		-0.745156	0.99954
-0.67064	0.999904		-0.67064	0.99822		-0.67064	0.999961		-0.67064	1.0016		-0.67064	1.00013		-0.67064	0.999965		-0.67064	1.00176		-0.67064	1.00071		-0.67064	1.00238		-0.67064	0.999977		-0.67064	1.00055		-0.67064	0.998605		-0.67064	1.00093		-0.67064	1.00071		-0.67064	1.00031		-0.67064	1.00184		-0.67064	1.00123
-0.596125	0.999631		-0.596125	0.998124		-0.596125	0.999054		-0.596125	1.00116		-0.596125	1.00005		-0.596125	1.00032		-0.596125	1.00241		-0.596125	1.00058		-0.596125	1.0018		-0.596125	0.999454		-0.596125	0.999598		-0.596125	0.998628		-0.596125	1.00118		-0.596125	1.00058		-0.596125	1.00048		-0.596125	1.00088		-0.596125	1.00168
-0.521609	0.999849		-0.521609	0.997526		-0.521609	0.998827		-0.521609	1.00123		-0.521609	0.999698		-0.521609	1.00007		-0.521609	1.00118		-0.521609	0.999732		-0.521609	1.0031		-0.521609	1.00028		-0.521609	0.999161		-0.521609	0.998149		-0.521609	1.00093		-0.521609	1.00022		-0.521609	0.999369		-0.521609	1.00054		-0.521609	1.00177
-0.447094	0.99965		-0.447094	0.999206		-0.447094	0.998766		-0.447094	1.00144		-0.447094	0.999595		-0.447094	1.00099		-0.447094	1.00101		-0.447094	1.00095		-0.447094	1.00258		-0.447094	0.999622		-0.447094	0.999011		-0.447094	0.997938		-0.447094	1.00135		-0.447094	1.00119		-0.447094	0.999085		-0.447094	1.00176		-0.447094	1.00037
-0.372578	0.999926		-0.372578	0.998842		-0.372578	0.9994		-0.372578	1.00023		-0.372578	1.00049		-0.372578	1.00143		-0.372578	1.00171		-0.372578	1.00128		-0.372578	1.00107		-0.372578	0.999009		-0.372578	0.999585		-0.372578	0.998115		-0.372578	1.0026		-0.372578	1.00101		-0.372578	0.998232		-0.372578	1.00239		-0.372578	0.999638
-0.298063	0.999693		-0.298063	0.999901		-0.298063	0.998575		-0.298063	0.999135		-0.298063	0.999424		-0.298063	1.00043		-0.298063	1.00141		-0.298063	1.00166		-0.298063	1.00052		-0.298063	0.999793		-0.298063	0.999607		-0.298063	0.99759		-0.298063	1.0021		-0.298063	1.00136		-0.298063	0.997883		-0.298063	1.00313		-0.298063	0.999781
-0.223547	0.999981		-0.223547	0.999337		-0.223547	0.997946		-0.223547	0.998463		-0.223547	0.998927		-0.223547	1.00192		-0.223547	1.00177		-0.223547	1.00205		-0.223547	1.00063		-0.223547	1.00024		-0.223547	0.999794		-0.223547	0.998988		-0.223547	1.00148		-0.223547	1.00169		-0.223547	0.997658		-0.223547	1.00338		-0.223547	1.00024
-0.149031	0.999034		-0.149031	0.999386		-0.149031	0.998026		-0.149031	0.99862		-0.149031	0.998454		-0.149031	1.00228		-0.149031	1.00259		-0.149031	1.00182		-0.149031	1.00084		-0.149031	1.00044		-0.149031	0.999441		-0.149031	1.00038		-0.149031	1.00227		-0.149031	1.00121		-0.149031	0.997559		-0.149031	1.00364		-0.149031	0.999784
-0.0745156	0.999258		-0.0745156	0.99956		-0.0745156	0.99889		-0.0745156	0.998526		-0.0745156	0.99809		-0.0745156	1.0023		-0.0745156	1.00216		-0.0745156	1.00106		-0.0745156	1.00152		-0.0745156	1.00087		-0.0745156	1.00057		-0.0745156	1.00081		-0.0745156	1.00183		-0.0745156	1.00062		-0.0745156	0.998136		-0.0745156	1.00439		-0.0745156	0.999328
0	0.998484		0	0.999217		0	0.998829		0	0.997662		0	0.998287		0	1.00158		0	1.00116		0	0.9998		0	1.00095		0	0.999531		0	1.00023		0	0.999518		0	1.00043		0	0.999818		0	0.997857		0	1.00234		0	0.998183
0.0745156	0.993043		0.0745156	0.99398		0.0745156	0.995223		0.0745156	0.993079		0.0745156	0.993345		0.0745156	0.996421		0.0745156	0.997481		0.0745156	0.994716		0.0745156	0.997078		0.0745156	0.995078		0.0745156	0.995404		0.0745156	0.995015		0.0745156	0.995679		0.0745156	0.994422		0.0745156	0.994562		0.0745156	0.99698		0.0745156	0.99469
0.149031	0.991241		0.149031	0.991115		0.149031	0.993382		0.149031	0.991002		0.149031	0.991256		0.149031	0.994258		0.149031	0.995572		0.149031	0.992164		0.149031	0.995462		0.149031	0.99234		0.149031	0.993551		0.149031	0.992362		0.149031	0.994131		0.149031	0.99162		0.149031	0.993074		0.149031	0.994961		0.149031	0.994179
0.223547	0.990219		0.223547	0.989903		0.223547	0.991651		0.223547	0.989222		0.223547	0.990964		0.223547	0.992464		0.223547	0.994086		0.223547	0.990415		0.223547	0.994021		0.223547	0.991696		0.223547	0.991215		0.223547	0.991621		0.223547	0.992054		0.223547	0.989049		0.223547	0.992051		0.223547	0.994206		0.223547	0.992875
0.298062	0.988429		0.298062	0.98794		0.298062	0.990461		0.298062	0.987712		0.298062	0.990438		0.298062	0.991469		0.298062	0.991811		0.298062	0.990253		0.298062	0.991714		0.298062	0.989701		0.298062	0.989547		0.298062	0.989184		0.298062	0.991667		0.298062	0.988664		0.298062	0.990128		0.298062	0.993417		0.298062	0.992991
0.372578	0.989146		0.372578	0.986659		0.372578	0.988963		0.372578	0.987812		0.372578	0.988807		0.372578	0.99027		0.372578	0.991427		0.372578	0.988281		0.372578	0.990609		0.372578	0.989007		0.372578	0.988002		0.372578	0.988124		0.372578	0.990446		0.372578	0.987898		0.372578	0.988896		0.372578	0.992758		0.372578	0.990861
0.447093	0.98843		0.447093	0.98628		0.447093	0.987605		0.447093	0.988157		0.447093	0.987318		0.447093	0.990397		0.447093	0.990553		0.447093	0.987713		0.447093	0.990265		0.447093	0.989125		0.447093	0.987852		0.447093	0.988067		0.447093	0.990304		0.447093	0.987905		0.447093	0.98789		0.447093	0.99031		0.447093	0.988963
0.521609	0.987091		0.521609	0.986395		0.521609	0.98586		0.521609	0.987565		0.521609	0.986768		0.521609	0.989718		0.521609	0.989488		0.521609	0.987693		0.521609	0.989959		0.521609	0.989025		0.521609	0.988058		0.521609	0.986494		0.521609	0.990198		0.521609	0.986844		0.521609	0.987799		0.521609	0.989211		0.521609	0.988038
0.596125	0.9868		0.596125	0.985091		0.596125	0.984348		0.596125	0.986554		0.596125	0.986625		0.596125	0.98987		0.596125	0.988545		0.596125	0.986129		0.596125	0.989943		0.596125	0.987387		0.596125	0.986878		0.596125	0.987103		0.596125	0.990329		0.596125	0.986053		0.596125	0.987282		0.596125	0.988082		0.596125	0.987675
0.67064	0.986964		0.67064	0.984681		0.67064	0.983495		0.67064	0.986541		0.67064	0.985715		0.67064	0.989251		0.67064	0.988262		0.67064	0.985255		0.67064	0.989342		0.67064	0.986856		0.67064	0.98574		0.67064	0.985897		0.67064	0.989164		0.67064	0.984489		0.67064	0.986781		0.67064	0.986996		0.67064	0.987542
0.745156	0.986455		0.745156	0.983865		0.745156	0.982945		0.745156	0.985355		0.745156	0.984453		0.745156	0.989034		0.745156	0.987147		0.745156	0.98443		0.745156	0.988838		0.745156	0.987049		0.745156	0.985534		0.745156	0.984948		0.745156	0.987924		0.745156	0.984446		0.745156	0.985404		0.745156	0.986207		0.745156	0.986601
0.819672	0.986431		0.819672	0.982855		0.819672	0.982542		0.819672	0.98423		0.819672	0.983986		0.819672	0.986929		0.819672	0.986063		0.819672	0.984238		0.819672	0.987358		0.819672	0.986425		0.819672	0.984868		0.819672	0.984379		0.819672	0.98652		0.819672	0.984422		0.819672	0.984306		0.819672	0.9875		0.819672	0.986108
0.894187	0.986075		0.894187	0.983668		0.894187	0.983123		0.894187	0.983503		0.894187	0.984008		0.894187	0.98692		0.894187	0.987272		0.894187	0.983506		0.894187	0.987144		0.894187	0.98532		0.894187	0.983777		0.894187	0.983908		0.894187	0.985672		0.894187	0.983972		0.894187	0.982721		0.894187	0.987587		0.894187	0.984686
0.968703	0.985482		0.968703	0.984313		0.968703	0.983685		0.968703	0.982928		0.968703	0.98284		0.968703	0.986426		0.968703	0.986652		0.968703	0.984215		0.968703	0.986367		0.968703	0.985422		0.968703	0.983069		0.968703	0.982807		0.968703	0.986125		0.968703	0.984145		0.968703	0.982739		0.968703	0.986214		0.968703	0.983652
1.04322	0.984427		1.04322	0.983992		1.04322	0.983308		1.04322	0.981684		1.04322	0.982508		1.04322	0.984655		1.04322	0.986597		1.04322	0.9835		1.04322	0.985776		1.04322	0.983766		1.04322	0.98223		1.04322	0.981332		1.04322	0.985865		1.04322	0.985242		1.04322	0.983479		1.04322	0.986693		1.04322	0.983122
1.11773	0.983724		1.11773	0.982517		1.11773	0.98211		1.11773	0.981864		1.11773	0.983121		1.11773	0.985616		1.11773	0.985307		1.11773	0.982428		1.11773	0.98588		1.11773	0.982691		1.11773	0.982368		1.11773	0.981472		1.11773	0.984618		1.11773	0.984402		1.11773	0.983143		1.11773	0.985244		1.11773	0.982085
1.19225	0.983223		1.19225	0.982303		1.19225	0.980738		1.19225	0.981373		1.19225	0.982037		1.19225	0.985337		1.19225	0.985054		1.19225	0.983185		1.19225	0.984162		1.19225	0.982447		1.19225	0.982724		1.19225	0.980782		1.19225	0.984262		1.19225	0.983074		1.19225	0.982952		1.19225	0.985353		1.19225	0.981844
1.26677	0.982365		1.26677	0.981751		1.26677	0.979996		1.26677	0.981774		1.26677	0.982456		1.26677	0.984734		1.26677	0.984526		1.26677	0.982937		1.26677	0.983788		1.26677	0.982421		1.26677	0.982264		1.26677	0.979828		1.26677	0.984293		1.26677	0.982363		1.26677	0.982963		1.26677	0.984898		1.26677	0.981313
1.34128	0.982675		1.34128	0.982039		1.34128	0.980672		1.34128	0.98101		1.34128	0.981439		1.34128	0.985325		1.34128	0.984512		1.34128	0.981773		1.34128	0.983305		1.34128	0.981669		1.34128	0.981973		1.34128	0.980455		1.34128	0.983097		1.34128	0.982916		1.34128	0.983223		1.34128	0.984727		1.34128	0.981684
1.4158	0.982246		1.4158	0.982342		1.4158	0.979872		1.4158	0.980388		1.4158	0.980283		1.4158	0.984036		1.4158	0.984101		1.4158	0.980561		1.4158	0.982547		1.4158	0.981076		1.4158	0.98094		1.4158	0.98026		1.4158	0.982838		1.4158	0.983068		1.4158	0.982586		1.4158	0.983784		1.4158	0.981935
1.49031	0.981006		1.49031	0.98192		1.49031	0.980075		1.49031	0.980962		1.49031	0.980571		1.49031	0.982431		1.49031	0.983579		1.49031	0.980568		1.49031	0.983434		1.49031	0.980066		1.49031	0.980897		1.49031	0.980011		1.49031	0.983466		1.49031	0.982629		1.49031	0.98228		1.49031	0.983386		1.49031	0.98132
1.56483	0.980678		1.56483	0.980932		1.56483	0.979321		1.56483	0.980119		1.56483	0.980042		1.56483	0.982324		1.56483	0.983296		1.56483	0.981007		1.56483	0.982081		1.56483	0.980437		1.56483	0.980263		1.56483	0.979235		1.56483	0.982918		1.56483	0.981317		1.56483	0.982247		1.56483	0.983019		1.56483	0.981634
1.63934	0.980916		1.63934	0.98119		1.63934	0.978926		1.63934	0.979929		1.63934	0.978979		1.63934	0.981627		1.63934	0.98346		1.63934	0.981215		1.63934	0.98078		1.63934	0.980919		1.63934	0.980335		1.63934	0.97901		1.63934	0.981384		1.63934	0.980911		1.63934	0.982077		1.63934	0.98364		1.63934	0.981959
1.71386	0.981086		1.71386	0.981183		1.71386	0.979318		1.71386	0.979685		1.71386	0.979322		1.71386	0.981889		1.71386	0.982937		1.71386	0.980608		1.71386	0.981539		1.71386	0.980971		1.71386	0.97964		1.71386	0.97975		1.71386	0.981257		1.71386	0.979772		1.71386	0.980553		1.71386	0.983427		1.71386	0.981143
1.78837	0.980149		1.78837	0.980921		1.78837	0.97954		1.78837	0.979411		1.78837	0.979261		1.78837	0.980762		1.78837	0.981414		1.78837	0.97919		1.78837	0.980448		1.78837	0.979542		1.78837	0.979211		1.78837	0.978401		1.78837	0.980396		1.78837	0.980394		1.78837	0.979073		1.78837	0.982901		1.78837	0.981346
1.86289	0.97918		1.86289	0.980603		1.86289	0.977667		1.86289	0.979654		1.86289	0.978146		1.86289	0.981516		1.86289	0.980321		1.86289	0.978948		1.86289	0.980006		1.86289	0.978942		1.86289	0.979811		1.86289	0.978406		1.86289	0.980135		1.86289	0.979723		1.86289	0.979868		1.86289	0.982526		1.86289	0.980398
1.93741	0.978132		1.93741	0.979905		1.93741	0.977429		1.93741	0.978629		1.93741	0.97852		1.93741	0.981779		1.93741	0.97981		1.93741	0.979122		1.93741	0.98063		1.93741	0.978475		1.93741	0.98018		1.93741	0.978803		1.93741	0.978961		1.93741	0.979423		1.93741	0.978681		1.93741	0.981352		1.93741	0.980469
2.01192	0.977563		2.01192	0.97905		2.01192	0.978124		2.01192	0.979001		2.01192	0.977819		2.01192	0.981672		2.01192	0.979522		2.01192	0.980109		2.01192	0.981261		2.01192	0.978992		2.01192	0.979126		2.01192	0.979153		2.01192	0.979084		2.01192	0.980172		2.01192	0.978095		2.01192	0.980594		2.01192	0.980026
2.08644	0.977625		2.08644	0.979295		2.08644	0.978608		2.08644	0.978498		2.08644	0.977079		2.08644	0.980537		2.08644	0.97912		2.08644	0.979932		2.08644	0.981315		2.08644	0.978151		2.08644	0.979304		2.08644	0.978232		2.08644	0.979567		2.08644	0.979941		2.08644	0.978248		2.08644	0.981936		2.08644	0.979143
2.16095	0.977132		2.16095	0.979161		2.16095	0.978457		2.16095	0.977251		2.16095	0.976699		2.16095	0.980322		2.16095	0.979362		2.16095	0.980169		2.16095	0.981188		2.16095	0.978919		2.16095	0.978708		2.16095	0.978592		2.16095	0.97889		2.16095	0.979647		2.16095	0.978466		2.16095	0.981952		2.16095	0.97815
2.23547	0.977302		2.23547	0.978679		2.23547	0.978544		2.23547	0.976249		2.23547	0.976311		2.23547	0.979875		2.23547	0.978798		2.23547	0.979876		2.23547	0.980745		2.23547	0.97763		2.23547	0.977407		2.23547	0.978648		2.23547	0.978255		2.23547	0.978434		2.23547	0.97858		2.23547	0.981999		2.23547	0.977853
2.30998	0.97721		2.30998	0.978902		2.30998	0.978758		2.30998	0.975753		2.30998	0.975663		2.30998	0.978932		2.30998	0.979487		2.30998	0.97803		2.30998	0.979204		2.30998	0.977389		2.30998	0.976508		2.30998	0.976737		2.30998	0.979148		2.30998	0.979443		2.30998	0.977098		2.30998	0.98193		2.30998	0.978385
2.3845	0.976904		2.3845	0.97824		2.3845	0.978596		2.3845	0.975035		2.3845	0.975044		2.3845	0.979135		2.3845	0.978906		2.3845	0.977732		2.3845	0.978562		2.3845	0.978525		2.3845	0.976503		2.3845	0.976729		2.3845	0.977958		2.3845	0.979148		2.3845	0.97647		2.3845	0.980963		2.3845	0.978076
2.45901	0.976934		2.45901	0.97765		2.45901	0.978017		2.45901	0.975815		2.45901	0.975298		2.45901	0.97803		2.45901	0.978818		2.45901	0.978428		2.45901	0.978958		2.45901	0.978235		2.45901	0.976663		2.45901	0.976914		2.45901	0.977644		2.45901	0.977743		2.45901	0.975996		2.45901	0.979448		2.45901	0.977125
2.53353	0.977286		2.53353	0.976607		2.53353	0.976159		2.53353	0.976349		2.53353	0.975817		2.53353	0.977473		2.53353	0.979606		2.53353	0.978093		2.53353	0.977938		2.53353	0.97685		2.53353	0.977056		2.53353	0.976263		2.53353	0.976759		2.53353	0.978008		2.53353	0.975706		2.53353	0.979366		2.53353	0.977904
2.60805	0.976735		2.60805	0.977314		2.60805	0.976006		2.60805	0.977101		2.60805	0.97545		2.60805	0.97719		2.60805	0.979441		2.60805	0.976929		2.60805	0.978788		2.60805	0.976059		2.60805	0.97611		2.60805	0.97552		2.60805	0.976377		2.60805	0.978546		2.60805	0.976366		2.60805	0.980018		2.60805	0.978442
2.68256	0.976153		2.68256	0.976252		2.68256	0.975235		2.68256	0.977084		2.68256	0.974901		2.68256	0.977445		2.68256	0.979216		2.68256	0.976953		2.68256	0.978496		2.68256	0.975945		2.68256	0.977275		2.68256	0.975805		2.68256	0.976045		2.68256	0.978206		2.68256	0.976399		2.68256	0.979977		2.68256	0.978396
2.75708	0.97582		2.75708	0.976021		2.75708	0.975067		2.75708	0.977477		2.75708	0.974347		2.75708	0.977605		2.75708	0.978107		2.75708	0.975868		2.75708	0.979016		2.75708	0.976994		2.75708	0.977788		2.75708	0.975681		2.75708	0.975668		2.75708	0.976717		2.75708	0.97579		2.75708	0.979782		2.75708	0.976936
2.83159	0.976268		2.83159	0.976046		2.83159	0.974883		2.83159	0.975974		2.83159	0.974935		2.83159	0.977215		2.83159	0.976776		2.83159	0.975478		2.83159	0.978863		2.83159	0.977116		2.83159	0.977241		2.83159	0.975655		2.83159	0.9765		2.83159	0.977206		2.83159	0.976331		2.83159	0.980282		2.83159	0.976308
2.90611	0.975656		2.90611	0.975755		2.90611	0.97407		2.90611	0.974757		2.90611	0.973916		2.90611	0.976785		2.90611	0.976499		2.90611	0.976019		2.90611	0.977556		2.90611	0.977577		2.90611	0.977523		2.90611	0.976294		2.90611	0.97696		2.90611	0.977181		2.90611	0.976769		2.90611	0.979368		2.90611	0.976605
2.98062	0.975484		2.98062	0.974448		2.98062	0.974269		2.98062	0.974462		2.98062	0.973735		2.98062	0.976902		2.98062	0.977082		2.98062	0.975252		2.98062	0.976679		2.98062	0.977358		2.98062	0.977685		2.98062	0.976694		2.98062	0.975821		2.98062	0.977371		2.98062	0.977104		2.98062	0.978104		2.98062	0.976998
3.05514	0.974933		3.05514	0.97367		3.05514	0.973717		3.05514	0.974067		3.05514	0.973848		3.05514	0.977736		3.05514	0.977457		3.05514	0.976179		3.05514	0.977028		3.05514	0.975847		3.05514	0.977612		3.05514	0.975756		3.05514	0.975679		3.05514	0.976278		3.05514	0.975447		3.05514	0.977275		3.05514	0.975354
3.12966	0.974003		3.12966	0.972664		3.12966	0.974311		3.12966	0.973167		3.12966	0.974417		3.12966	0.97628		3.12966	0.978026		3.12966	0.976297		3.12966	0.977314		3.12966	0.975221		3.12966	0.975487		3.12966	0.974652		3.12966	0.976518		3.12966	0.975986		3.12966	0.974453		3.12966	0.976857		3.12966	0.975899
3.20417	0.973245		3.20417	0.97238		3.20417	0.973891		3.20417	0.973243		3.20417	0.974556		3.20417	0.976432		3.20417	0.978281		3.20417	0.976243		3.20417	0.977045		3.20417	0.974572		3.20417	0.975176		3.20417	0.973859		3.20417	0.976797		3.20417	0.975975		3.20417	0.974127		3.20417	0.976316		3.20417	0.975186
3.27869	0.974186		3.27869	0.972684		3.27869	0.973094		3.27869	0.974043		3.27869	0.973954		3.27869	0.976463		3.27869	0.976883		3.27869	0.975672		3.27869	0.975716		3.27869	0.975277		3.27869	0.974307		3.27869	0.974233		3.27869	0.977038		3.27869	0.974721		3.27869	0.974289		3.27869	0.976744		3.27869	0.975267
3.3532	0.97386		3.3532	0.971819		3.3532	0.973859		3.3532	0.9751		3.3532	0.973065		3.3532	0.975266		3.3532	0.976785		3.3532	0.974239		3.3532	0.975097		3.3532	0.974444		3.3532	0.974003		3.3532	0.973596		3.3532	0.977211		3.3532	0.974465		3.3532	0.974921		3.3532	0.976453		3.3532	0.97434
3.42772	0.972895		3.42772	0.97193		3.42772	0.974108		3.42772	0.973048		3.42772	0.972606		3.42772	0.97453		3.42772	0.977084		3.42772	0.973688		3.42772	0.97408		3.42772	0.973699		3.42772	0.974593		3.42772	0.973976		3.42772	0.976372		3.42772	0.974963		3.42772	0.974942		3.42772	0.975665		3.42772	0.972722
3.50223	0.972207		3.50223	0.972478		3.50223	0.972306		3.50223	0.973345		3.50223	0.972168		3.50223	0.974907		3.50223	0.977242		3.50223	0.972615		3.50223	0.974043		3.50223	0.973528		3.50223	0.975154		3.50223	0.973011		3.50223	0.975598		3.50223	0.975106		3.50223	0.974264		3.50223	0.974648		3.50223	0.972128
3.57675	0.972465		3.57675	0.971056		3.57675	0.97211		3.57675	0.973998		3.57675	0.972032		3.57675	0.975799		3.57675	0.975484		3.57675	0.973249		3.57675	0.973369		3.57675	0.974477		3.57675	0.9732		3.57675	0.973047		3.57675	0.976056		3.57675	0.974476		3.57675	0.9742		3.57675	0.974538		3.57675	0.972624
3.65126	0.971925		3.65126	0.970447		3.65126	0.972383		3.65126	0.972637		3.65126	0.972553		3.65126	0.975752		3.65126	0.974662		3.65126	0.974121		3.65126	0.973356		3.65126	0.974185		3.65126	0.973565		3.65126	0.973582		3.65126	0.975826		3.65126	0.973994		3.65126	0.973656		3.65126	0.974369		3.65126	0.973117
3.72578	0.972149		3.72578	0.970611		3.72578	0.972835		3.72578	0.972265		3.72578	0.971764		3.72578	0.97419		3.72578	0.975682		3.72578	0.973267		3.72578	0.973469		3.72578	0.973762		3.72578	0.973407		3.72578	0.97287		3.72578	0.975774		3.72578	0.974124		3.72578	0.972991		3.72578	0.974966		3.72578	0.973304
3.8003	0.971499		3.8003	0.969298		3.8003	0.972923		3.8003	0.973026		3.8003	0.971631		3.8003	0.973914		3.8003	0.975175		3.8003	0.972804		3.8003	0.973275		3.8003	0.973767		3.8003	0.972947		3.8003	0.973343		3.8003	0.974476		3.8003	0.973886		3.8003	0.973288		3.8003	0.974414		3.8003	0.973734
3.87481	0.972393		3.87481	0.969539		3.87481	0.972934		3.87481	0.972651		3.87481	0.972528		3.87481	0.974103		3.87481	0.974006		3.87481	0.973067		3.87481	0.972362		3.87481	0.973347		3.87481	0.973915		3.87481	0.971882		3.87481	0.973586		3.87481	0.974039		3.87481	0.972406		3.87481	0.973974		3.87481	0.974054
3.94933	0.972769		3.94933	0.969338		3.94933	0.97152		3.94933	0.972091		3.94933	0.972453		3.94933	0.974781		3.94933	0.973532		3.94933	0.971758		3.94933	0.972416		3.94933	0.973916		3.94933	0.973702		3.94933	0.971042		3.94933	0.97424		3.94933	0.973711		3.94933	0.971474		3.94933	0.973207		3.94933	0.974587
4.02384	0.972434		4.02384	0.970726		4.02384	0.971191		4.02384	0.971266		4.02384	0.974016		4.02384	0.975181		4.02384	0.974601		4.02384	0.972014		4.02384	0.973137		4.02384	0.973936		4.02384	0.974208		4.02384	0.970598		4.02384	0.972586		4.02384	0.97347		4.02384	0.971728		4.02384	0.973341		4.02384	0.974067
4.09836	0.972721		4.09836	0.97075		4.09836	0.970731		4.09836	0.970518		4.09836	0.973333		4.09836	0.974833		4.09836	0.97555		4.09836	0.971991		4.09836	0.973183		4.09836	0.974197		4.09836	0.973605		4.09836	0.970379		4.09836	0.972708		4.09836	0.97308		4.09836	0.972581		4.09836	0.973243		4.09836	0.972897
4.17287	0.972362		4.17287	0.969992		4.17287	0.970447		4.17287	0.970664		4.17287	0.972066		4.17287	0.973997		4.17287	0.974227		4.17287	0.97272		4.17287	0.972696		4.17287	0.973905		4.17287	0.97259		4.17287	0.970768		4.17287	0.973319		4.17287	0.972837		4.17287	0.973008		4.17287	0.974037		4.17287	0.972732
4.24739	0.971603		4.24739	0.969499		4.24739	0.968894		4.24739	0.971405		4.24739	0.971634		4.24739	0.973763		4.24739	0.973529		4.24739	0.971588		4.24739	0.973243		4.24739	0.973692		4.24739	0.971697		4.24739	0.97071		4.24739	0.973541		4.24739	0.972891		4.24739	0.972826		4.24739	0.972787		4.24739	0.972403
4.3219	0.971556		4.3219	0.970407		4.3219	0.969454		4.3219	0.970893		4.3219	0.971365		4.3219	0.972492		4.3219	0.973886		4.3219	0.970745		4.3219	0.972349		4.3219	0.972415		4.3219	0.972278		4.3219	0.970695		4.3219	0.973391		4.3219	0.971381		4.3219	0.973125		4.3219	0.973285		4.3219	0.972789
4.39642	0.971307		4.39642	0.971175		4.39642	0.968964		4.39642	0.970981		4.39642	0.971013		4.39642	0.971598		4.39642	0.9745		4.39642	0.970849		4.39642	0.971378		4.39642	0.971735		4.39642	0.971268		4.39642	0.970113		4.39642	0.97362		4.39642	0.970913		4.39642	0.971674		4.39642	0.97373		4.39642	0.973297
4.47094	0.970686		4.47094	0.971258		4.47094	0.969386		4.47094	0.971409		4.47094	0.97122		4.47094	0.971888		4.47094	0.974089		4.47094	0.971533		4.47094	0.97074		4.47094	0.971371		4.47094	0.970549		4.47094	0.970532		4.47094	0.972492		4.47094	0.971665		4.47094	0.971027		4.47094	0.974401		4.47094	0.972881
4.54545	0.970514		4.54545	0.970962		4.54545	0.969191		4.54545	0.970702		4.54545	0.970253		4.54545	0.971873		4.54545	0.973219		4.54545	0.971928		4.54545	0.971037		4.54545	0.972008		4.54545	0.971247		4.54545	0.969983		4.54545	0.972966		4.54545	0.972092		4.54545	0.970595		4.54545	0.973663		4.54545	0.971982
4.61997	0.970207		4.61997	0.969561		4.61997	0.969832		4.61997	0.972163		4.61997	0.970677		4.61997	0.971811		4.61997	0.973477		4.61997	0.97227		4.61997	0.971929		4.61997	0.972286		4.61997	0.971123		4.61997	0.96964		4.61997	0.971637		4.61997	0.971072		4.61997	0.97036		4.61997	0.974062		4.61997	0.970606
4.69448	0.970693		4.69448	0.970017		4.69448	0.970332		4.69448	0.971731		4.69448	0.969783		4.69448	0.972022		4.69448	0.973243		4.69448	0.972651		4.69448	0.972094		4.69448	0.972131		4.69448	0.971567		4.69448	0.968835		4.69448	0.970316		4.69448	0.969549		4.69448	0.97109		4.69448	0.974759		4.69448	0.969922
4.769	0.970047		4.769	0.969244		4.769	0.970311		4.769	0.970565		4.769	0.969632		4.769	0.97111		4.769	0.973316		4.769	0.972116		4.769	0.971765		4.769	0.971338		4.769	0.9717		4.769	0.969649		4.769	0.970226		4.769	0.969958		4.769	0.971017		4.769	0.974635		4.769	0.970955
4.84351	0.969139		4.84351	0.969614		4.84351	0.970299		4.84351	0.969778		4.84351	0.970754		4.84351	0.970855		4.84351	0.972332		4.84351	0.970749		4.84351	0.971628		4.84351	0.972202		4.84351	0.970801		4.84351	0.968723		4.84351	0.970105		4.84351	0.968794		4.84351	0.97059		4.84351	0.974883		4.84351	0.971417
4.91803	0.968804		4.91803	0.968782		4.91803	0.970143		4.91803	0.968422		4.91803	0.970711		4.91803	0.971914		4.91803	0.971975		4.91803	0.969505		4.91803	0.971781		4.91803	0.970843		4.91803	0.970974		4.91803	0.96847		4.91803	0.97079		4.91803	0.969204		4.91803	0.969458		4.91803	0.974545		4.91803	0.970298
4.99255	0.969026		4.99255	0.968561		4.99255	0.969397		4.99255	0.96841		4.99255	0.969489		4.99255	0.971591		4.99255	0.972004		4.99255	0.969078		4.99255	0.972404		4.99255	0.971264		4.99255	0.971546		4.99255	0.968643		4.99255	0.970331		4.99255	0.970413		4.99255	0.96849		4.99255	0.973558		4.99255	0.970787
5.06706	0.967852		5.06706	0.968985		5.06706	0.969219		5.06706	0.969506		5.06706	0.969548		5.06706	0.970544		5.06706	0.972221		5.06706	0.968448		5.06706	0.97196		5.06706	0.97134		5.06706	0.971489		5.06706	0.96913		5.06706	0.971227		5.06706	0.970399		5.06706	0.968689		5.06706	0.972722		5.06706	0.970147
5.14158	0.968331		5.14158	0.969571		5.14158	0.96876		5.14158	0.967986		5.14158	0.969986		5.14158	0.970313		5.14158	0.971483		5.14158	0.969096		5.14158	0.97117		5.14158	0.971584		5.14158	0.970669		5.14158	0.970036		5.14158	0.971393		5.14158	0.969721		5.14158	0.968566		5.14158	0.973547		5.14158	0.970715
5.21609	0.968222		5.21609	0.969921		5.21609	0.969011		5.21609	0.968266		5.21609	0.970581		5.21609	0.969518		5.21609	0.971879		5.21609	0.969689		5.21609	0.972		5.21609	0.971737		5.21609	0.970901		5.21609	0.970146		5.21609	0.971879		5.21609	0.969573		5.21609	0.969258		5.21609	0.97282		5.21609	0.968963
5.29061	0.967858		5.29061	0.969731		5.29061	0.969248		5.29061	0.968516		5.29061	0.969364		5.29061	0.970843		5.29061	0.971517		5.29061	0.969859		5.29061	0.971522		5.29061	0.970546		5.29061	0.969504		5.29061	0.968895		5.29061	0.970312		5.29061	0.969165		5.29061	0.968764		5.29061	0.972334		5.29061	0.969187
5.36512	0.967604		5.36512	0.968463		5.36512	0.968132		5.36512	0.967931		5.36512	0.969922		5.36512	0.971055		5.36512	0.971176		5.36512	0.9708		5.36512	0.97121		5.36512	0.970123		5.36512	0.968536		5.36512	0.968875		5.36512	0.969857		5.36512	0.969749		5.36512	0.968051		5.36512	0.972927		5.36512	0.969844
5.43964	0.967319		5.43964	0.96767		5.43964	0.968365		5.43964	0.968182		5.43964	0.970293		5.43964	0.969851		5.43964	0.971211		5.43964	0.970408		5.43964	0.970736		5.43964	0.970248		5.43964	0.968655		5.43964	0.968912		5.43964	0.970127		5.43964	0.970137		5.43964	0.967851		5.43964	0.972057		5.43964	0.970034
5.51415	0.966233		5.51415	0.968124		5.51415	0.968339		5.51415	0.969342		5.51415	0.968882		5.51415	0.969453		5.51415	0.970677		5.51415	0.970488		5.51415	0.971135		5.51415	0.971062		5.51415	0.968879		5.51415	0.968826		5.51415	0.96989		5.51415	0.970761		5.51415	0.967961		5.51415	0.972722		5.51415	0.971134
5.58867	0.966504		5.58867	0.96824		5.58867	0.967422		5.58867	0.969167		5.58867	0.968319		5.58867	0.969251		5.58867	0.970951		5.58867	0.96996		5.58867	0.97189		5.58867	0.970942		5.58867	0.969877		5.58867	0.968438		5.58867	0.970614		5.58867	0.970917		5.58867	0.968109		5.58867	0.972402		5.58867	0.970936
5.66319	0.967281		5.66319	0.967482		5.66319	0.96663		5.66319	0.969148		5.66319	0.966812		5.66319	0.969536		5.66319	0.970025		5.66319	0.969685		5.66319	0.971578		5.66319	0.971178		5.66319	0.969725		5.66319	0.967523		5.66319	0.970053		5.66319	0.970334		5.66319	0.968423		5.66319	0.971774		5.66319	0.970414
5.7377	0.966121		5.7377	0.96781		5.7377	0.965747		5.7377	0.968538		5.7377	0.966647		5.7377	0.969439		5.7377	0.969938		5.7377	0.969868		5.7377	0.97145		5.7377	0.970272		5.7377	0.969179		5.7377	0.968129		5.7377	0.969335		5.7377	0.969183		5.7377	0.969308		5.7377	0.970788		5.7377	0.969912
5.81222	0.967045		5.81222	0.966956		5.81222	0.965535		5.81222	0.968715		5.81222	0.966582		5.81222	0.97002		5.81222	0.969245		5.81222	0.969537		5.81222	0.970096		5.81222	0.96958		5.81222	0.969256		5.81222	0.966627		5.81222	0.97032		5.81222	0.968979		5.81222	0.969304		5.81222	0.969895		5.81222	0.969942
5.88673	0.96607		5.88673	0.967701		5.88673	0.966748		5.88673	0.968863		5.88673	0.967098		5.88673	0.970344		5.88673	0.969591		5.88673	0.967994		5.88673	0.969542		5.88673	0.969485		5.88673	0.968138		5.88673	0.968072		5.88673	0.97038		5.88673	0.970127		5.88673	0.970369		5.88673	0.969979		5.88673	0.969932
5.96125	0.965433		5.96125	0.967738		5.96125	0.96721		5.96125	0.96875		5.96125	0.966713		5.96125	0.971058		5.96125	0.969829		5.96125	0.967464		5.96125	0.9699		5.96125	0.969777		5.96125	0.968121		5.96125	0.968262		5.96125	0.970272		5.96125	0.969036		5.96125	0.970568		5.96125	0.969771		5.96125	0.968822
6.03576	0.96521		6.03576	0.966789		6.03576	0.967715		6.03576	0.967795		6.03576	0.966809		6.03576	0.970483		6.03576	0.969977		6.03576	0.96737		6.03576	0.968583		6.03576	0.968515		6.03576	0.96868		6.03576	0.968603		6.03576	0.969024		6.03576	0.968403		6.03576	0.970176		6.03576	0.97079		6.03576	0.967812
6.11028	0.964789		6.11028	0.966906		6.11028	0.966427		6.11028	0.966426		6.11028	0.965955		6.11028	0.969698		6.11028	0.969605		6.11028	0.968278		6.11028	0.96778		6.11028	0.969037		6.11028	0.968749		6.11028	0.967555		6.11028	0.96837		6.11028	0.968398		6.11028	0.969417		6.11028	0.969635		6.11028	0.96776
6.18479	0.965065		6.18479	0.966051		6.18479	0.966393		6.18479	0.966448		6.18479	0.966453		6.18479	0.970544		6.18479	0.969127		6.18479	0.968523		6.18479	0.967558		6.18479	0.969539		6.18479	0.969438		6.18479	0.967678		6.18479	0.967325		6.18479	0.967888		6.18479	0.968303		6.18479	0.970299		6.18479	0.966299
6.25931	0.965989		6.25931	0.965775		6.25931	0.965802		6.25931	0.96628		6.25931	0.966258		6.25931	0.970596		6.25931	0.969227		6.25931	0.967662		6.25931	0.967264		6.25931	0.968653		6.25931	0.969373		6.25931	0.966939		6.25931	0.968023		6.25931	0.968645		6.25931	0.967805		6.25931	0.969276		6.25931	0.966676
6.33383	0.965788		6.33383	0.966041		6.33383	0.965961		6.33383	0.966785		6.33383	0.967324		6.33383	0.970879		6.33383	0.969909		6.33383	0.968457		6.33383	0.967525		6.33383	0.96855		6.33383	0.968741		6.33383	0.966457		6.33383	0.968139		6.33383	0.968772		6.33383	0.967629		6.33383	0.969131		6.33383	0.966372
6.40834	0.965301		6.40834	0.965833		6.40834	0.965058		6.40834	0.966166		6.40834	0.965988		6.40834	0.970818		6.40834	0.969165		6.40834	0.96892		6.40834	0.967796		6.40834	0.969171		6.40834	0.968491		6.40834	0.967548		6.40834	0.968647		6.40834	0.967952		6.40834	0.967888		6.40834	0.970173		6.40834	0.96598
6.48286	0.964867		6.48286	0.966317		6.48286	0.964754		6.48286	0.966075		6.48286	0.96629		6.48286	0.969471		6.48286	0.967649		6.48286	0.96874		6.48286	0.967318		6.48286	0.969108		6.48286	0.967268		6.48286	0.967803		6.48286	0.967709		6.48286	0.968192		6.48286	0.967986		6.48286	0.970564		6.48286	0.965147
6.55737	0.965109		6.55737	0.96631		6.55737	0.965998		6.55737	0.965469		6.55737	0.966725		6.55737	0.970124		6.55737	0.967776		6.55737	0.969086		6.55737	0.968695		6.55737	0.968343		6.55737	0.966541		6.55737	0.968045		6.55737	0.96744		6.55737	0.968382		6.55737	0.96756		6.55737	0.969458		6.55737	0.965868
6.63189	0.96531		6.63189	0.965775		6.63189	0.966404		6.63189	0.965421		6.63189	0.966251		6.63189	0.970147		6.63189	0.967775		6.63189	0.967859		6.63189	0.968687		6.63189	0.968221		6.63189	0.966102		6.63189	0.968276		6.63189	0.966709		6.63189	0.968327		6.63189	0.967749		6.63189	0.968959		6.63189	0.966524
6.7064	0.964639		6.7064	0.965286		6.7064	0.966616		6.7064	0.964943		6.7064	0.967816		6.7064	0.970182		6.7064	0.967624		6.7064	0.96678		6.7064	0.969004		6.7064	0.96729		6.7064	0.96534		6.7064	0.96867		6.7064	0.967715		6.7064	0.968394		6.7064	0.967797		6.7064	0.968234		6.7064	0.966619
6.78092	0.964422		6.78092	0.965615		6.78092	0.966392		6.78092	0.965175		6.78092	0.96793		6.78092	0.970143		6.78092	0.967049		6.78092	0.967189		6.78092	0.969147		6.78092	0.967632		6.78092	0.967459		6.78092	0.967847		6.78092	0.966746		6.78092	0.96879		6.78092	0.967213		6.78092	0.968445		6.78092	0.967441
6.85544	0.965076		6.85544	0.964618		6.85544	0.965304		6.85544	0.966358		6.85544	0.967317		6.85544	0.968693		6.85544	0.967017		6.85544	0.96612		6.85544	0.96931		6.85544	0.966872		6.85544	0.967258		6.85544	0.966961		6.85544	0.966894		6.85544	0.968738		6.85544	0.968188		6.85544	0.967621		6.85544	0.967264
6.92995	0.965214		6.92995	0.964042		6.92995	0.965855		6.92995	0.967031		6.92995	0.967299		6.92995	0.967443		6.92995	0.967248		6.92995	0.965708		6.92995	0.969319		6.92995	0.966455		6.92995	0.967772		6.92995	0.966835		6.92995	0.967569		6.92995	0.967561		6.92995	0.967759		6.92995	0.969053		6.92995	0.966643
7.00447	0.966139		7.00447	0.96377		7.00447	0.964926		7.00447	0.967736		7.00447	0.967538		7.00447	0.966504		7.00447	0.967991		7.00447	0.967035		7.00447	0.968017		7.00447	0.966812		7.00447	0.967482		7.00447	0.966119		7.00447	0.967069		7.00447	0.968168		7.00447	0.966992		7.00447	0.969476		7.00447	0.965749
7.07898	0.966363		7.07898	0.963029		7.07898	0.965273		7.07898	0.967542		7.07898	0.967527		7.07898	0.966945		7.07898	0.968486		7.07898	0.967203		7.07898	0.967311		7.07898	0.967288		7.07898	0.966836		7.07898	0.966523		7.07898	0.967771		7.07898	0.968267		7.07898	0.966188		7.07898	0.969384		7.07898	0.965914
7.1535	0.966078		7.1535	0.9626		7.1535	0.964555		7.1535	0.96591		7.1535	0.967533		7.1535	0.967578		7.1535	0.967144		7.1535	0.967891		7.1535	0.968215		7.1535	0.966581		7.1535	0.967128		7.1535	0.966615		7.1535	0.96822		7.1535	0.967441		7.1535	0.966824		7.1535	0.969331		7.1535	0.966319
7.22801	0.96519		7.22801	0.963384		7.22801	0.965199		7.22801	0.965991		7.22801	0.967835		7.22801	0.967542		7.22801	0.967061		7.22801	0.967822		7.22801	0.967627		7.22801	0.965692		7.22801	0.967244		7.22801	0.965251		7.22801	0.967214		7.22801	0.96757		7.22801	0.965813		7.22801	0.968957		7.22801	0.965706
7.30253	0.964729		7.30253	0.963809		7.30253	0.964651		7.30253	0.965011		7.30253	0.967974		7.30253	0.967239		7.30253	0.966923		7.30253	0.96757		7.30253	0.967146		7.30253	0.966537		7.30253	0.966247		7.30253	0.965608		7.30253	0.967023		7.30253	0.968186		7.30253	0.966704		7.30253	0.968811		7.30253	0.96536
7.37704	0.964939		7.37704	0.964317		7.37704	0.965045		7.37704	0.966551		7.37704	0.968138		7.37704	0.96784		7.37704	0.96598		7.37704	0.9667		7.37704	0.96613		7.37704	0.967394		7.37704	0.966201		7.37704	0.965628		7.37704	0.967541		7.37704	0.968091		7.37704	0.966382		7.37704	0.969391		7.37704	0.964897
7.45156	0.964443		7.45156	0.963979		7.45156	0.964095		7.45156	0.96608		7.45156	0.968048		7.45156	0.966362		7.45156	0.966392		7.45156	0.965864		7.45156	0.965894		7.45156	0.967269		7.45156	0.966519		7.45156	0.965036		7.45156	0.967477		7.45156	0.967385		7.45156	0.965802		7.45156	0.969368		7.45156	0.964331
7.52608	0.964788		7.52608	0.963066		7.52608	0.964262		7.52608	0.965333		7.52608	0.967666		7.52608	0.96699		7.52608	0.966971		7.52608	0.967236		7.52608	0.966812		7.52608	0.967881		7.52608	0.967393		7.52608	0.964706		7.52608	0.967812		7.52608	0.966072		7.52608	0.96524		7.52608	0.97043		7.52608	0.964563
7.60059	0.964117		7.60059	0.963054		7.60059	0.964542		7.60059	0.964635		7.60059	0.966804		7.60059	0.966724		7.60059	0.966551		7.60059	0.966814		7.60059	0.967807		7.60059	0.967618		7.60059	0.96748		7.60059	0.965036		7.60059	0.968369		7.60059	0.965717		7.60059	0.96561		7.60059	0.969801		7.60059	0.964083
7.67511	0.964685		7.67511	0.963138		7.67511	0.963024		7.67511	0.966244		7.67511	0.96619		7.67511	0.967046		7.67511	0.967341		7.67511	0.967145		7.67511	0.96791		7.67511	0.967411		7.67511	0.966882		7.67511	0.964228		7.67511	0.968417		7.67511	0.966536		7.67511	0.964676		7.67511	0.968457		7.67511	0.965414
7.74962	0.965316		7.74962	0.964273		7.74962	0.963757		7.74962	0.965875		7.74962	0.96665		7.74962	0.96633		7.74962	0.968221		7.74962	0.966281		7.74962	0.968212		7.74962	0.966994		7.74962	0.966081		7.74962	0.965253		7.74962	0.968537		7.74962	0.966366		7.74962	0.9654		7.74962	0.967624		7.74962	0.966257
7.82414	0.964438		7.82414	0.964839		7.82414	0.964193		7.82414	0.965397		7.82414	0.966333		7.82414	0.966845		7.82414	0.968677		7.82414	0.966854		7.82414	0.968278		7.82414	0.965971		7.82414	0.965499		7.82414	0.965708		7.82414	0.966415		7.82414	0.965191		7.82414	0.965321		7.82414	0.967475		7.82414	0.966683
7.89865	0.964826		7.89865	0.964622		7.89865	0.964705		7.89865	0.965785		7.89865	0.965531		7.89865	0.966681		7.89865	0.968606		7.89865	0.96718		7.89865	0.96769		7.89865	0.966327		7.89865	0.965959		7.89865	0.964902		7.89865	0.9664		7.89865	0.964093		7.89865	0.964867		7.89865	0.96806		7.89865	0.966458
7.97317	0.965049		7.97317	0.963803		7.97317	0.964339		7.97317	0.964336		7.97317	0.966173		7.97317	0.967137		7.97317	0.967891		7.97317	0.96685		7.97317	0.966807		7.97317	0.965078		7.97317	0.966259		7.97317	0.965974		7.97317	0.966469		7.97317	0.964688		7.97317	0.965497		7.97317	0.968312		7.97317	0.965823
8.04768	0.965549		8.04768	0.964249		8.04768	0.964534		8.04768	0.964077		8.04768	0.96467		8.04768	0.967295		8.04768	0.967454		8.04768	0.965896		8.04768	0.965828		8.04768	0.964366		8.04768	0.964974		8.04768	0.965616		8.04768	0.965319		8.04768	0.964953		8.04768	0.96535		8.04768	0.967897		8.04768	0.964955
8.1222	0.965562		8.1222	0.963717		8.1222	0.963326		8.1222	0.96383		8.1222	0.963781		8.1222	0.967145		8.1222	0.966594		8.1222	0.966208		8.1222	0.965709		8.1222	0.963783		8.1222	0.964607		8.1222	0.965752		8.1222	0.96581		8.1222	0.965841		8.1222	0.965504		8.1222	0.967886		8.1222	0.964104
8.19672	0.96537		8.19672	0.963941		8.19672	0.962501		8.19672	0.964983		8.19672	0.963902		8.19672	0.966767		8.19672	0.965463		8.19672	0.965021		8.19672	0.96652		8.19672	0.96334		8.19672	0.963241		8.19672	0.964747		8.19672	0.966023		8.19672	0.965897		8.19672	0.965419		8.19672	0.966336		8.19672	0.964189
8.27123	0.964458		8.27123	0.963343		8.27123	0.963464		8.27123	0.964727		8.27123	0.963344		8.27123	0.966774		8.27123	0.965484		8.27123	0.963866		8.27123	0.966469		8.27123	0.963476		8.27123	0.963575		8.27123	0.964697		8.27123	0.965347		8.27123	0.965366		8.27123	0.96577		8.27123	0.96611		8.27123	0.964944
8.34575	0.964422		8.34575	0.96303		8.34575	0.962972		8.34575	0.964841		8.34575	0.963094		8.34575	0.967479		8.34575	0.965553		8.34575	0.963741		8.34575	0.965761		8.34575	0.963807		8.34575	0.964156		8.34575	0.964128		8.34575	0.965639		8.34575	0.964859		8.34575	0.964948		8.34575	0.966631		8.34575	0.964725
8.42026	0.96448		8.42026	0.963324		8.42026	0.963288		8.42026	0.965022		8.42026	0.963131		8.42026	0.967782		8.42026	0.966404		8.42026	0.964944		8.42026	0.966216		8.42026	0.964577		8.42026	0.965139		8.42026	0.962625		8.42026	0.964799		8.42026	0.964046		8.42026	0.964362		8.42026	0.966631		8.42026	0.965218
8.49478	0.964399		8.49478	0.963038		8.49478	0.96237		8.49478	0.964227		8.49478	0.962871		8.49478	0.968359		8.49478	0.965618		8.49478	0.965576		8.49478	0.96513		8.49478	0.963886		8.49478	0.965915		8.49478	0.962987		8.49478	0.964858		8.49478	0.963394		8.49478	0.964786		8.49478	0.966104		8.49478	0.964278
8.56929	0.964412		8.56929	0.963		8.56929	0.963572		8.56929	0.965006		8.56929	0.964311		8.56929	0.968158		8.56929	0.966538		8.56929	0.965531		8.56929	0.965609		8.56929	0.963574		8.56929	0.965966		8.56929	0.963409		8.56929	0.96516		8.56929	0.964019		8.56929	0.964236		8.56929	0.967325		8.56929	0.963872
8.64381	0.964248		8.64381	0.96261		8.64381	0.962213		8.64381	0.965005		8.64381	0.964541		8.64381	0.966285		8.64381	0.967139		8.64381	0.964921		8.64381	0.965739		8.64381	0.963823		8.64381	0.966265		8.64381	0.963114		8.64381	0.964634		8.64381	0.964236		8.64381	0.964424		8.64381	0.967552		8.64381	0.964411
8.71833	0.963848		8.71833	0.963282		8.71833	0.961964		8.71833	0.963981		8.71833	0.964636		8.71833	0.966018		8.71833	0.967402		8.71833	0.965136		8.71833	0.966212		8.71833	0.965066		8.71833	0.966254		8.71833	0.963142		8.71833	0.964191		8.71833	0.964346		8.71833	0.963922		8.71833	0.966838		8.71833	0.965141
8.79284	0.963919		8.79284	0.962725		8.79284	0.961178		8.79284	0.963822		8.79284	0.964283		8.79284	0.966529		8.79284	0.966558		8.79284	0.964911		8.79284	0.967146		8.79284	0.96562		8.79284	0.965854		8.79284	0.963104		8.79284	0.964		8.79284	0.9637		8.79284	0.964741		8.79284	0.966027		8.79284	0.96541
8.86736	0.96403		8.86736	0.963302		8.86736	0.962006		8.86736	0.963634		8.86736	0.964364		8.86736	0.965341		8.86736	0.965785		8.86736	0.965031		8.86736	0.967012		8.86736	0.965518		8.86736	0.96472		8.86736	0.962102		8.86736	0.963628		8.86736	0.964856		8.86736	0.96499		8.86736	0.967189		8.86736	0.96407
8.94187	0.96371		8.94187	0.96241		8.94187	0.962524		8.94187	0.963852		8.94187	0.964159		8.94187	0.964214		8.94187	0.965336		8.94187	0.964133		8.94187	0.966695		8.94187	0.965105		8.94187	0.964242		8.94187	0.961912		8.94187	0.963606		8.94187	0.965168		8.94187	0.965351		8.94187	0.967463		8.94187	0.963277
9.01639	0.963591		9.01639	0.961897		9.01639	0.961786		9.01639	0.963697		9.01639	0.963866		9.01639	0.964626		9.01639	0.965985		9.01639	0.965104		9.01639	0.966199		9.01639	0.965008		9.01639	0.964767		9.01639	0.962045		9.01639	0.963959		9.01639	0.964874		9.01639	0.966143		9.01639	0.967347		9.01639	0.963233
9.0909	0.963721		9.0909	0.961272		9.0909	0.962901		9.0909	0.963577		9.0909	0.963511		9.0909	0.965142		9.0909	0.965182		9.0909	0.963734		9.0909	0.966258		9.0909	0.964444		9.0909	0.96442		9.0909	0.962219		9.0909	0.964251		9.0909	0.964732		9.0909	0.965952		9.0909	0.966112		9.0909	0.964002
9.16542	0.96418		9.16542	0.961097		9.16542	0.963712		9.16542	0.964087		9.16542	0.964018		9.16542	0.964805		9.16542	0.96495		9.16542	0.963853		9.16542	0.966032		9.16542	0.963459		9.16542	0.964219		9.16542	0.962394		9.16542	0.964644		9.16542	0.964345		9.16542	0.964573		9.16542	0.966516		9.16542	0.964936
9.23993	0.962709		9.23993	0.961322		9.23993	0.963113		9.23993	0.964467		9.23993	0.965078		9.23993	0.964491		9.23993	0.96415		9.23993	0.963931		9.23993	0.964926		9.23993	0.963452		9.23993	0.964108		9.23993	0.962862		9.23993	0.964707		9.23993	0.963303		9.23993	0.965734		9.23993	0.967763		9.23993	0.964583
9.31445	0.962064		9.31445	0.96212		9.31445	0.963091		9.31445	0.964653		9.31445	0.964524		9.31445	0.965481		9.31445	0.963721		9.31445	0.963494		9.31445	0.964187		9.31445	0.963825		9.31445	0.964081		9.31445	0.962199		9.31445	0.96396		9.31445	0.963092		9.31445	0.964958		9.31445	0.967842		9.31445	0.963608
9.38897	0.961197		9.38897	0.96196		9.38897	0.962691		9.38897	0.964275		9.38897	0.965541		9.38897	0.965306		9.38897	0.964671		9.38897	0.963023		9.38897	0.964015		9.38897	0.963004		9.38897	0.964247		9.38897	0.962832		9.38897	0.963144		9.38897	0.962914		9.38897	0.964739		9.38897	0.96763		9.38897	0.964383
9.46348	0.961482		9.46348	0.962045		9.46348	0.96265		9.46348	0.964075		9.46348	0.96556		9.46348	0.9649		9.46348	0.965204		9.46348	0.962372		9.46348	0.964736		9.46348	0.963116		9.46348	0.964898		9.46348	0.963326		9.46348	0.96283		9.46348	0.964061		9.46348	0.96497		9.46348	0.966619		9.46348	0.965283
9.538	0.961179		9.538	0.962191		9.538	0.962486		9.538	0.963347		9.538	0.964715		9.538	0.964063		9.538	0.965922		9.538	0.962354		9.538	0.964477		9.538	0.964227		9.538	0.964434		9.538	0.962071		9.538	0.96451		9.538	0.964168		9.538	0.964451		9.538	0.966923		9.538	0.96529
9.61251	0.961591		9.61251	0.961206		9.61251	0.962165		9.61251	0.963177		9.61251	0.963987		9.61251	0.965486		9.61251	0.966069		9.61251	0.962769		9.61251	0.96493		9.61251	0.964196		9.61251	0.963838		9.61251	0.96226		9.61251	0.965041		9.61251	0.964715		9.61251	0.963626		9.61251	0.967025		9.61251	0.964919
9.68703	0.962034		9.68703	0.96056		9.68703	0.960677		9.68703	0.962684		9.68703	0.964451		9.68703	0.965409		9.68703	0.965232		9.68703	0.962927		9.68703	0.964948		9.68703	0.964293		9.68703	0.963961		9.68703	0.962889		9.68703	0.965748		9.68703	0.964399		9.68703	0.963161		9.68703	0.966028		9.68703	0.96406
9.76154	0.962272		9.76154	0.960562		9.76154	0.96078		9.76154	0.962041		9.76154	0.96477		9.76154	0.965725		9.76154	0.965261		9.76154	0.963422		9.76154	0.9656		9.76154	0.96377		9.76154	0.964092		9.76154	0.962863		9.76154	0.966009		9.76154	0.963781		9.76154	0.964418		9.76154	0.96592		9.76154	0.964954
9.83606	0.961945		9.83606	0.960317		9.83606	0.960357		9.83606	0.963673		9.83606	0.965151		9.83606	0.964894		9.83606	0.965759		9.83606	0.962362		9.83606	0.964132		9.83606	0.962723		9.83606	0.963745		9.83606	0.96212		9.83606	0.965375		9.83606	0.962578		9.83606	0.964022		9.83606	0.965437		9.83606	0.964338
9.91057	0.961024		9.91057	0.95981		9.91057	0.96062		9.91057	0.963415		9.91057	0.965213		9.91057	0.965325		9.91057	0.965736		9.91057	0.962095		9.91057	0.963177		9.91057	0.962354		9.91057	0.964334		9.91057	0.962688		9.91057	0.964167		9.91057	0.963057		9.91057	0.964356		9.91057	0.964968		9.91057	0.963404
9.98509	0.96086		9.98509	0.960756		9.98509	0.960361		9.98509	0.962976		9.98509	0.96476		9.98509	0.965493		9.98509	0.964579		9.98509	0.962488		9.98509	0.96268		9.98509	0.962596		9.98509	0.965232		9.98509	0.962365		9.98509	0.964313		9.98509	0.96321		9.98509	0.963828		9.98509	0.965096		9.98509	0.964077
10.0596	0.960876		10.0596	0.961507		10.0596	0.961679		10.0596	0.96371		10.0596	0.965261		10.0596	0.965197		10.0596	0.965302		10.0596	0.962647		10.0596	0.962425		10.0596	0.962543		10.0596	0.965125		10.0596	0.963441		10.0596	0.96412		10.0596	0.962401		10.0596	0.963929		10.0596	0.965566		10.0596	0.962779
10.1341	0.961195		10.1341	0.962257		10.1341	0.962383		10.1341	0.963881		10.1341	0.964534		10.1341	0.965053		10.1341	0.964954		10.1341	0.963584		10.1341	0.963871		10.1341	0.963359		10.1341	0.964664		10.1341	0.963137		10.1341	0.964015		10.1341	0.961953		10.1341	0.963686		10.1341	0.966473		10.1341	0.963992
10.2086	0.960839		10.2086	0.961416		10.2086	0.962942		10.2086	0.962909		10.2086	0.9646		10.2086	0.965357		10.2086	0.964607		10.2086	0.963008		10.2086	0.965104		10.2086	0.963278		10.2086	0.964629		10.2086	0.963555		10.2086	0.964014		10.2086	0.962048		10.2086	0.963066		10.2086	0.966255		10.2086	0.964386
10.2832	0.960016		10.2832	0.962427		10.2832	0.963252		10.2832	0.962504		10.2832	0.964873		10.2832	0.964771		10.2832	0.963477		10.2832	0.963544		10.2832	0.964815		10.2832	0.963377		10.2832	0.963781		10.2832	0.963643		10.2832	0.963825		10.2832	0.961572		10.2832	0.962492		10.2832	0.967333		10.2832	0.963833
10.3577	0.95987		10.3577	0.96311		10.3577	0.962957		10.3577	0.962402		10.3577	0.964572		10.3577	0.965113		10.3577	0.96416		10.3577	0.96271		10.3577	0.965334		10.3577	0.963456		10.3577	0.963743		10.3577	0.962029		10.3577	0.964405		10.3577	0.96306		10.3577	0.962449		10.3577	0.96661		10.3577	0.963195
10.4322	0.959839		10.4322	0.961942		10.4322	0.96246		10.4322	0.962706		10.4322	0.964684		10.4322	0.965137		10.4322	0.964227		10.4322	0.962352		10.4322	0.965354		10.4322	0.963055		10.4322	0.963841		10.4322	0.961619		10.4322	0.965022		10.4322	0.963316		10.4322	0.961823		10.4322	0.965751		10.4322	0.963189
10.5067	0.960718		10.5067	0.961056		10.5067	0.962535		10.5067	0.962321		10.5067	0.964532		10.5067	0.964525		10.5067	0.963462		10.5067	0.961896		10.5067	0.965621		10.5067	0.964099		10.5067	0.963022		10.5067	0.961026		10.5067	0.965465		10.5067	0.963844		10.5067	0.961778		10.5067	0.966037		10.5067	0.962842
10.5812	0.96041		10.5812	0.960464		10.5812	0.963191		10.5812	0.96262		10.5812	0.964084		10.5812	0.963726		10.5812	0.964986		10.5812	0.961854		10.5812	0.965174		10.5812	0.964435		10.5812	0.962605		10.5812	0.961598		10.5812	0.965043		10.5812	0.963749		10.5812	0.962432		10.5812	0.96636		10.5812	0.961996
10.6557	0.960843		10.6557	0.961438		10.6557	0.963127		10.6557	0.961917		10.6557	0.963657		10.6557	0.963393		10.6557	0.965674		10.6557	0.961814		10.6557	0.96414		10.6557	0.964302		10.6557	0.963147		10.6557	0.961145		10.6557	0.964209		10.6557	0.963145		10.6557	0.962071		10.6557	0.964875		10.6557	0.961451
10.7302	0.962234		10.7302	0.961074		10.7302	0.963027		10.7302	0.96223		10.7302	0.963671		10.7302	0.964348		10.7302	0.964662		10.7302	0.962414		10.7302	0.963191		10.7302	0.963222		10.7302	0.962697		10.7302	0.960295		10.7302	0.963189		10.7302	0.963008		10.7302	0.962358		10.7302	0.964812		10.7302	0.961664
10.8048	0.961648		10.8048	0.961313		10.8048	0.961632		10.8048	0.961384		10.8048	0.964487		10.8048	0.963813		10.8048	0.964117		10.8048	0.964061		10.8048	0.962487		10.8048	0.962452		10.8048	0.962223		10.8048	0.960078		10.8048	0.962661		10.8048	0.962739		10.8048	0.962191		10.8048	0.965161		10.8048	0.96217
10.8793	0.962513		10.8793	0.962255		10.8793	0.961239		10.8793	0.962572		10.8793	0.96457		10.8793	0.964157		10.8793	0.963581		10.8793	0.963978		10.8793	0.962394		10.8793	0.963677		10.8793	0.962716		10.8793	0.961524		10.8793	0.963468		10.8793	0.961841		10.8793	0.961313		10.8793	0.964794		10.8793	0.961845
10.9538	0.96258		10.9538	0.96224		10.9538	0.96018		10.9538	0.962225		10.9538	0.964512		10.9538	0.964508		10.9538	0.963323		10.9538	0.962753		10.9538	0.962047		10.9538	0.963564		10.9538	0.962309		10.9538	0.962262		10.9538	0.963968		10.9538	0.961035		10.9538	0.961834		10.9538	0.965155		10.9538	0.961121
11.0283	0.96343		11.0283	0.962364		11.0283	0.960357		11.0283	0.961615		11.0283	0.964014		11.0283	0.963758		11.0283	0.963669		11.0283	0.962618		11.0283	0.962844		11.0283	0.963342		11.0283	0.962861		11.0283	0.961972		11.0283	0.964421		11.0283	0.960948		11.0283	0.961033		11.0283	0.965371		11.0283	0.961208
11.1028	0.962364		11.1028	0.962085		11.1028	0.961401		11.1028	0.960966		11.1028	0.962539		11.1028	0.96422		11.1028	0.96338		11.1028	0.963327		11.1028	0.962569		11.1028	0.963369		11.1028	0.962297		11.1028	0.9622		11.1028	0.964255		11.1028	0.960994		11.1028	0.961122		11.1028	0.964897		11.1028	0.961708
11.1773	0.961251		11.1773	0.962815		11.1773	0.961846		11.1773	0.960805		11.1773	0.962035		11.1773	0.964744		11.1773	0.964199		11.1773	0.963751		11.1773	0.963533		11.1773	0.962833		11.1773	0.961494		11.1773	0.962302		11.1773	0.962723		11.1773	0.962287		11.1773	0.960749		11.1773	0.96416		11.1773	0.961045
11.2519	0.960816		11.2519	0.9629		11.2519	0.960926		11.2519	0.96119		11.2519	0.961916		11.2519	0.963684		11.2519	0.964036		11.2519	0.962648		11.2519	0.963345		11.2519	0.963284		11.2519	0.96119		11.2519	0.961157		11.2519	0.962638		11.2519	0.963337		11.2519	0.960413		11.2519	0.963416		11.2519	0.960794
11.3264	0.959997		11.3264	0.963138		11.3264	0.96038		11.3264	0.962327		11.3264	0.961638		11.3264	0.964102		11.3264	0.964139		11.3264	0.963097		11.3264	0.964066		11.3264	0.963926		11.3264	0.960596		11.3264	0.961756		11.3264	0.963087		11.3264	0.962923		11.3264	0.960729		11.3264	0.96441		11.3264	0.960874
11.4009	0.95926		11.4009	0.961253		11.4009	0.95996		11.4009	0.962935		11.4009	0.961401		11.4009	0.963781		11.4009	0.963602		11.4009	0.96281		11.4009	0.963635		11.4009	0.963909		11.4009	0.960941		11.4009	0.961168		11.4009	0.963868		11.4009	0.962346		11.4009	0.960867		11.4009	0.964718		11.4009	0.960274
11.4754	0.95949		11.4754	0.96094		11.4754	0.960514		11.4754	0.96367		11.4754	0.961024		11.4754	0.964084		11.4754	0.963024		11.4754	0.963021		11.4754	0.962873		11.4754	0.964007		11.4754	0.960134		11.4754	0.961822		11.4754	0.963512		11.4754	0.961548		11.4754	0.961616		11.4754	0.96355		11.4754	0.960684
11.5499	0.959404		11.5499	0.960567		11.5499	0.960376		11.5499	0.963746		11.5499	0.960536		11.5499	0.96346		11.5499	0.962744		11.5499	0.963692		11.5499	0.963046		11.5499	0.963506		11.5499	0.960608		11.5499	0.962702		11.5499	0.963984		11.5499	0.960474		11.5499	0.962331		11.5499	0.962618		11.5499	0.961455
11.6244	0.960064		11.6244	0.96008		11.6244	0.960742		11.6244	0.962071		11.6244	0.960952		11.6244	0.964678		11.6244	0.962557		11.6244	0.962309		11.6244	0.963472		11.6244	0.962642		11.6244	0.960413		11.6244	0.962672		11.6244	0.963579		11.6244	0.96086		11.6244	0.960982		11.6244	0.963437		11.6244	0.960512
11.6989	0.959656		11.6989	0.960917		11.6989	0.960275		11.6989	0.961633		11.6989	0.960401		11.6989	0.964277		11.6989	0.962617		11.6989	0.962598		11.6989	0.963606		11.6989	0.961838		11.6989	0.960133		11.6989	0.963187		11.6989	0.963435		11.6989	0.962542		11.6989	0.960749		11.6989	0.964467		11.6989	0.960731
11.7735	0.960511		11.7735	0.961182		11.7735	0.960251		11.7735	0.961311		11.7735	0.961858		11.7735	0.963419		11.7735	0.96245		11.7735	0.962478		11.7735	0.963752		11.7735	0.962439		11.7735	0.959883		11.7735	0.963049		11.7735	0.96391		11.7735	0.962517		11.7735	0.961247		11.7735	0.964438		11.7735	0.961354
11.848	0.960668		11.848	0.960621		11.848	0.961017		11.848	0.962191		11.848	0.961964		11.848	0.964158		11.848	0.962221		11.848	0.963452		11.848	0.963368		11.848	0.961856		11.848	0.960514		11.848	0.962143		11.848	0.962535		11.848	0.961957		11.848	0.961394		11.848	0.964037		11.848	0.960898
11.9225	0.960691		11.9225	0.960679		11.9225	0.96163		11.9225	0.962972		11.9225	0.961279		11.9225	0.964996		11.9225	0.962524		11.9225	0.962636		11.9225	0.962488		11.9225	0.961739		11.9225	0.961626		11.9225	0.962264		11.9225	0.962236		11.9225	0.96158		11.9225	0.961785		11.9225	0.964477		11.9225	0.962496
11.997	0.961245		11.997	0.959207		11.997	0.961743		11.997	0.961881		11.997	0.961493		11.997	0.965609		11.997	0.963227		11.997	0.961722		11.997	0.963144		11.997	0.962022		11.997	0.961898		11.997	0.960911		11.997	0.961449		11.997	0.960815		11.997	0.961639		11.997	0.963395		11.997	0.962749
12.0715	0.960461		12.0715	0.959606		12.0715	0.960517		12.0715	0.961539		12.0715	0.961636		12.0715	0.964994		12.0715	0.963675		12.0715	0.961099		12.0715	0.962293		12.0715	0.962131		12.0715	0.963348		12.0715	0.960091		12.0715	0.961445		12.0715	0.962592		12.0715	0.961885		12.0715	0.962976		12.0715	0.963043
12.146	0.961424		12.146	0.960594		12.146	0.961093		12.146	0.962418		12.146	0.962704		12.146	0.963878		12.146	0.9628		12.146	0.961404		12.146	0.962611		12.146	0.962524		12.146	0.963663		12.146	0.959948		12.146	0.961384		12.146	0.962297		12.146	0.9614		12.146	0.962723		12.146	0.963526
12.2206	0.961619		12.2206	0.959636		12.2206	0.959857		12.2206	0.961699		12.2206	0.962572		12.2206	0.964246		12.2206	0.962963		12.2206	0.961086		12.2206	0.963898		12.2206	0.962231		12.2206	0.964116		12.2206	0.96088		12.2206	0.962458		12.2206	0.961279		12.2206	0.961822		12.2206	0.963859		12.2206	0.964311
12.2951	0.961365		12.2951	0.961308		12.2951	0.959845		12.2951	0.962082		12.2951	0.963104		12.2951	0.963793		12.2951	0.963967		12.2951	0.960972		12.2951	0.963712		12.2951	0.963127		12.2951	0.963907		12.2951	0.960303		12.2951	0.962207		12.2951	0.960684		12.2951	0.962517		12.2951	0.963897		12.2951	0.964124
12.3696	0.960496		12.3696	0.961334		12.3696	0.960291		12.3696	0.96202		12.3696	0.961784		12.3696	0.96395		12.3696	0.962908		12.3696	0.961386		12.3696	0.96239		12.3696	0.962973		12.3696	0.96197		12.3696	0.959652		12.3696	0.961607		12.3696	0.960381		12.3696	0.962572		12.3696	0.963622		12.3696	0.963759
12.4441	0.960654		12.4441	0.961566		12.4441	0.959382		12.4441	0.961397		12.4441	0.961348		12.4441	0.964784		12.4441	0.962619		12.4441	0.960958		12.4441	0.962121		12.4441	0.963632		12.4441	0.96193		12.4441	0.96073		12.4441	0.96134		12.4441	0.960256		12.4441	0.961979		12.4441	0.963533		12.4441	0.962471
12.5186	0.960734		12.5186	0.961073		12.5186	0.959397		12.5186	0.962275		12.5186	0.96213		12.5186	0.964886		12.5186	0.962016		12.5186	0.961916		12.5186	0.962956		12.5186	0.963432		12.5186	0.961408		12.5186	0.96161		12.5186	0.960963		12.5186	0.959726		12.5186	0.962306		12.5186	0.963552		12.5186	0.961523
12.5931	0.959555		12.5931	0.962052		12.5931	0.959582		12.5931	0.962629		12.5931	0.962718		12.5931	0.963451		12.5931	0.963496		12.5931	0.962063		12.5931	0.963359		12.5931	0.961666		12.5931	0.962053		12.5931	0.961608		12.5931	0.962286		12.5931	0.960568		12.5931	0.96245		12.5931	0.963904		12.5931	0.961349
12.6677	0.958916		12.6677	0.962313		12.6677	0.959777		12.6677	0.961436		12.6677	0.962451		12.6677	0.963069		12.6677	0.963013		12.6677	0.96142		12.6677	0.964044		12.6677	0.961871		12.6677	0.962931		12.6677	0.960852		12.6677	0.961841		12.6677	0.961565		12.6677	0.961487		12.6677	0.96355		12.6677	0.962411
12.7422	0.959185		12.7422	0.962782		12.7422	0.959711		12.7422	0.960546		12.7422	0.96202		12.7422	0.962605		12.7422	0.963545		12.7422	0.961629		12.7422	0.962903		12.7422	0.962347		12.7422	0.962414		12.7422	0.961742		12.7422	0.961154		12.7422	0.960661		12.7422	0.961035		12.7422	0.964168		12.7422	0.963158
12.8167	0.959811		12.8167	0.962352		12.8167	0.960741		12.8167	0.961052		12.8167	0.96205		12.8167	0.961919		12.8167	0.964243		12.8167	0.960952		12.8167	0.963335		12.8167	0.961562		12.8167	0.961864		12.8167	0.960922		12.8167	0.960759		12.8167	0.961128		12.8167	0.961105		12.8167	0.962743		12.8167	0.962873
12.8912	0.959956		12.8912	0.961053		12.8912	0.960878		12.8912	0.961113		12.8912	0.961874		12.8912	0.961455		12.8912	0.963087		12.8912	0.960604		12.8912	0.963895		12.8912	0.96271		12.8912	0.962618		12.8912	0.959927		12.8912	0.96014		12.8912	0.960718		12.8912	0.961799		12.8912	0.962581		12.8912	0.961418
12.9657	0.960027		12.9657	0.960913		12.9657	0.959941		12.9657	0.960978		12.9657	0.962024		12.9657	0.961012		12.9657	0.964411		12.9657	0.959831		12.9657	0.963625		12.9657	0.962677		12.9657	0.962887		12.9657	0.961135		12.9657	0.959981		12.9657	0.96083		12.9657	0.962329		12.9657	0.964195		12.9657	0.960957
13.0402	0.961047		13.0402	0.961462		13.0402	0.959531		13.0402	0.96091		13.0402	0.96103		13.0402	0.961523		13.0402	0.964753		13.0402	0.95947		13.0402	0.963368		13.0402	0.96123		13.0402	0.962734		13.0402	0.961719		13.0402	0.961806		13.0402	0.961004		13.0402	0.962664		13.0402	0.964562		13.0402	0.962187
13.1147	0.960782		13.1147	0.960787		13.1147	0.958888		13.1147	0.962062		13.1147	0.960902		13.1147	0.961466		13.1147	0.96401		13.1147	0.959905		13.1147	0.963305		13.1147	0.960548		13.1147	0.962384		13.1147	0.961411		13.1147	0.962566		13.1147	0.962091		13.1147	0.961362		13.1147	0.963096		13.1147	0.962853
13.1893	0.959955		13.1893	0.9604		13.1893	0.958717		13.1893	0.962711		13.1893	0.961808		13.1893	0.96277		13.1893	0.96415		13.1893	0.961664		13.1893	0.963783		13.1893	0.960207		13.1893	0.962235		13.1893	0.960086		13.1893	0.962559		13.1893	0.962828		13.1893	0.962291		13.1893	0.962506		13.1893	0.962416
13.2638	0.959117		13.2638	0.96024		13.2638	0.95823		13.2638	0.961981		13.2638	0.962318		13.2638	0.962154		13.2638	0.963799		13.2638	0.960573		13.2638	0.963842		13.2638	0.96057		13.2638	0.96219		13.2638	0.960225		13.2638	0.963326		13.2638	0.962677		13.2638	0.962274		13.2638	0.96235		13.2638	0.963276
13.3383	0.958959		13.3383	0.959651		13.3383	0.958356		13.3383	0.962056		13.3383	0.962557		13.3383	0.962007		13.3383	0.96328		13.3383	0.960062		13.3383	0.963751		13.3383	0.960862		13.3383	0.961942		13.3383	0.960859		13.3383	0.962411		13.3383	0.961501		13.3383	0.962584		13.3383	0.961859		13.3383	0.963495
13.4128	0.960281		13.4128	0.95948		13.4128	0.957354		13.4128	0.962483		13.4128	0.962637		13.4128	0.962378		13.4128	0.963921		13.4128	0.959728		13.4128	0.962004		13.4128	0.961835		13.4128	0.961936		13.4128	0.96132		13.4128	0.962288		13.4128	0.961174		13.4128	0.961308		13.4128	0.961689		13.4128	0.96341
13.4873	0.959738		13.4873	0.959454		13.4873	0.958564		13.4873	0.96176		13.4873	0.962648		13.4873	0.963182		13.4873	0.964178		13.4873	0.961004		13.4873	0.961513		13.4873	0.961688		13.4873	0.961911		13.4873	0.95997		13.4873	0.962919		13.4873	0.96129		13.4873	0.960248		13.4873	0.962673		13.4873	0.962797
13.5618	0.959458		13.5618	0.960535		13.5618	0.959213		13.5618	0.961386		13.5618	0.961231		13.5618	0.964053		13.5618	0.963872		13.5618	0.960412		13.5618	0.961443		13.5618	0.961193		13.5618	0.961271		13.5618	0.959875		13.5618	0.963327		13.5618	0.960439		13.5618	0.959849		13.5618	0.963686		13.5618	0.963045
13.6364	0.95862		13.6364	0.960743		13.6364	0.960545		13.6364	0.961859		13.6364	0.962214		13.6364	0.963887		13.6364	0.963689		13.6364	0.960378		13.6364	0.961488		13.6364	0.962107		13.6364	0.962124		13.6364	0.959431		13.6364	0.962425		13.6364	0.959719		13.6364	0.961001		13.6364	0.964603		13.6364	0.963088
13.7109	0.959538		13.7109	0.961118		13.7109	0.961086		13.7109	0.961023		13.7109	0.962085		13.7109	0.963938		13.7109	0.962557		13.7109	0.961345		13.7109	0.961646		13.7109	0.962356		13.7109	0.96138		13.7109	0.958947		13.7109	0.961354		13.7109	0.960677		13.7109	0.960207		13.7109	0.964408		13.7109	0.963415
13.7854	0.959659		13.7854	0.960595		13.7854	0.960097		13.7854	0.960602		13.7854	0.96105		13.7854	0.963125		13.7854	0.962012		13.7854	0.961783		13.7854	0.962585		13.7854	0.961305		13.7854	0.962007		13.7854	0.959793		13.7854	0.960857		13.7854	0.961121		13.7854	0.960357		13.7854	0.963345		13.7854	0.963192
13.8599	0.958822		13.8599	0.961213		13.8599	0.961132		13.8599	0.960401		13.8599	0.961232		13.8599	0.963306		13.8599	0.961254		13.8599	0.961451		13.8599	0.96307		13.8599	0.961301		13.8599	0.962571		13.8599	0.959448		13.8599	0.961573		13.8599	0.96148		13.8599	0.959626		13.8599	0.962259		13.8599	0.963862
13.9344	0.958589		13.9344	0.96115		13.9344	0.960974		13.9344	0.960606		13.9344	0.962068		13.9344	0.962752		13.9344	0.961418		13.9344	0.961827		13.9344	0.963394		13.9344	0.961187		13.9344	0.962072		13.9344	0.96093		13.9344	0.961272		13.9344	0.9622		13.9344	0.95907		13.9344	0.962196		13.9344	0.963487
14.0089	0.95923		14.0089	0.960726		14.0089	0.960664		14.0089	0.961208		14.0089	0.96242		14.0089	0.961983		14.0089	0.961699		14.0089	0.961756		14.0089	0.963224		14.0089	0.960691		14.0089	0.961404		14.0089	0.960252		14.0089	0.962248		14.0089	0.961909		14.0089	0.959053		14.0089	0.961859		14.0089	0.962424
14.0834	0.9588		14.0834	0.959304		14.0834	0.960884		14.0834	0.962021		14.0834	0.962062		14.0834	0.962173		14.0834	0.962498		14.0834	0.960851		14.0834	0.962773		14.0834	0.961411		14.0834	0.960845		14.0834	0.96016		14.0834	0.962059		14.0834	0.961476		14.0834	0.960159		14.0834	0.962293		14.0834	0.96227
14.158	0.958888		14.158	0.959619		14.158	0.960858		14.158	0.962827		14.158	0.961692		14.158	0.963085		14.158	0.961772		14.158	0.960916		14.158	0.963144		14.158	0.960185		14.158	0.962007		14.158	0.959848		14.158	0.961884		14.158	0.961259		14.158	0.961269		14.158	0.962508		14.158	0.961293
14.2325	0.959341		14.2325	0.960715		14.2325	0.960107		14.2325	0.962711		14.2325	0.961483		14.2325	0.963383		14.2325	0.962592		14.2325	0.961151		14.2325	0.963503		14.2325	0.960601		14.2325	0.962827		14.2325	0.960494		14.2325	0.961104		14.2325	0.960484		14.2325	0.961434		14.2325	0.962581		14.2325	0.960692
14.307	0.959166		14.307	0.960704		14.307	0.959914		14.307	0.96373		14.307	0.961006		14.307	0.962549		14.307	0.96236		14.307	0.960891		14.307	0.962287		14.307	0.961331		14.307	0.962636		14.307	0.961005		14.307	0.960828		14.307	0.960379		14.307	0.962258		14.307	0.96287		14.307	0.961844
14.3815	0.958986		14.3815	0.960308		14.3815	0.96063		14.3815	0.963232		14.3815	0.960411		14.3815	0.963484		14.3815	0.962651		14.3815	0.961362		14.3815	0.962171		14.3815	0.961805		14.3815	0.963012		14.3815	0.961241		14.3815	0.960708		14.3815	0.960959		14.3815	0.962583		14.3815	0.961977		14.3815	0.961785
14.456	0.959757		14.456	0.959139		14.456	0.960605		14.456	0.962307		14.456	0.960872		14.456	0.964186		14.456	0.963159		14.456	0.961603		14.456	0.962261		14.456	0.961172		14.456	0.963178		14.456	0.961455		14.456	0.961014		14.456	0.960989		14.456	0.962232		14.456	0.961382		14.456	0.961773
14.5305	0.960832		14.5305	0.959591		14.5305	0.960644		14.5305	0.962902		14.5305	0.961657		14.5305	0.964478		14.5305	0.96237		14.5305	0.960734		14.5305	0.962039		14.5305	0.961193		14.5305	0.963335		14.5305	0.961751		14.5305	0.962064		14.5305	0.960255		14.5305	0.961421		14.5305	0.961671		14.5305	0.961197
14.6051	0.960228		14.6051	0.960296		14.6051	0.960371		14.6051	0.961666		14.6051	0.962106		14.6051	0.964136		14.6051	0.9621		14.6051	0.9604		14.6051	0.962587		14.6051	0.961083		14.6051	0.963172		14.6051	0.961726		14.6051	0.962052		14.6051	0.959851		14.6051	0.961539		14.6051	0.962837		14.6051	0.960734
14.6796	0.960334		14.6796	0.959698		14.6796	0.959424		14.6796	0.96068		14.6796	0.961957		14.6796	0.96332		14.6796	0.96143		14.6796	0.959471		14.6796	0.963605		14.6796	0.961891		14.6796	0.963197		14.6796	0.961408		14.6796	0.961575		14.6796	0.959401		14.6796	0.961978		14.6796	0.963536		14.6796	0.960315
14.7541	0.959131		14.7541	0.959297		14.7541	0.959352		14.7541	0.960333		14.7541	0.961526		14.7541	0.962371		14.7541	0.961553		14.7541	0.958987		14.7541	0.963179		14.7541	0.961948		14.7541	0.962985		14.7541	0.96019		14.7541	0.961656		14.7541	0.959283		14.7541	0.961556		14.7541	0.963937		14.7541	0.961314
14.8286	0.95902		14.8286	0.960203		14.8286	0.959007		14.8286	0.96056		14.8286	0.961647		14.8286	0.962156		14.8286	0.962785		14.8286	0.960238		14.8286	0.963472		14.8286	0.962826		14.8286	0.961599		14.8286	0.959748		14.8286	0.961769		14.8286	0.959135		14.8286	0.961363		14.8286	0.963707		14.8286	0.961631
14.9031	0.958964		14.9031	0.959664		14.9031	0.959125		14.9031	0.960534		14.9031	0.961902		14.9031	0.962517		14.9031	0.963363		14.9031	0.96115		14.9031	0.963436		14.9031	0.962248		14.9031	0.961257		14.9031	0.95854		14.9031	0.962796		14.9031	0.958609		14.9031	0.961452		14.9031	0.963003		14.9031	0.962228
14.9776	0.959342		14.9776	0.959672		14.9776	0.959176		14.9776	0.961015		14.9776	0.960507		14.9776	0.963108		14.9776	0.963617		14.9776	0.961623		14.9776	0.96231		14.9776	0.961757		14.9776	0.961589		14.9776	0.958818		14.9776	0.963018		14.9776	0.959866		14.9776	0.960755		14.9776	0.963903		14.9776	0.962672
15.0522	0.959756		15.0522	0.958639		15.0522	0.961061		15.0522	0.961189		15.0522	0.960293		15.0522	0.962484		15.0522	0.963091		15.0522	0.960825		15.0522	0.961809		15.0522	0.960803		15.0522	0.960755		15.0522	0.959829		15.0522	0.962695		15.0522	0.960746		15.0522	0.961558		15.0522	0.963403		15.0522	0.960999
15.1267	0.959258		15.1267	0.958297		15.1267	0.960713		15.1267	0.960426		15.1267	0.959942		15.1267	0.96296		15.1267	0.962404		15.1267	0.960902		15.1267	0.961523		15.1267	0.961177		15.1267	0.961582		15.1267	0.960271		15.1267	0.961696		15.1267	0.961007		15.1267	0.96207		15.1267	0.96296		15.1267	0.960875
15.2012	0.959608		15.2012	0.958927		15.2012	0.96068		15.2012	0.960282		15.2012	0.960342		15.2012	0.962382		15.2012	0.96281		15.2012	0.961507		15.2012	0.961389		15.2012	0.960735		15.2012	0.960722		15.2012	0.95981		15.2012	0.961463		15.2012	0.96066		15.2012	0.961996		15.2012	0.96368		15.2012	0.960858
15.2757	0.960636		15.2757	0.959054		15.2757	0.960154		15.2757	0.961463		15.2757	0.961221		15.2757	0.962181		15.2757	0.962801		15.2757	0.961987		15.2757	0.961805		15.2757	0.960986		15.2757	0.961207		15.2757	0.959931		15.2757	0.961017		15.2757	0.959339		15.2757	0.961265		15.2757	0.963761		15.2757	0.960772
15.3502	0.960779		15.3502	0.959165		15.3502	0.960012		15.3502	0.962544		15.3502	0.960799		15.3502	0.96237		15.3502	0.962898		15.3502	0.962594		15.3502	0.960967		15.3502	0.961363		15.3502	0.961748		15.3502	0.95915		15.3502	0.960881		15.3502	0.958822		15.3502	0.960736		15.3502	0.962767		15.3502	0.961082
15.4247	0.960861		15.4247	0.96014		15.4247	0.960841		15.4247	0.96209		15.4247	0.959698		15.4247	0.962186		15.4247	0.962442		15.4247	0.961904		15.4247	0.960614		15.4247	0.961735		15.4247	0.960789		15.4247	0.958523		15.4247	0.960142		15.4247	0.959115		15.4247	0.961258		15.4247	0.963334		15.4247	0.961515
15.4992	0.959651		15.4992	0.959189		15.4992	0.961097		15.4992	0.960883		15.4992	0.960897		15.4992	0.961218		15.4992	0.962154		15.4992	0.961316		15.4992	0.960329		15.4992	0.962626		15.4992	0.961213		15.4992	0.959649		15.4992	0.960046		15.4992	0.958974		15.4992	0.960434		15.4992	0.962045		15.4992	0.960797
15.5738	0.959172		15.5738	0.95923		15.5738	0.961611		15.5738	0.960934		15.5738	0.961221		15.5738	0.961014		15.5738	0.963296		15.5738	0.960596		15.5738	0.961088		15.5738	0.962584		15.5738	0.961179		15.5738	0.96028		15.5738	0.959384		15.5738	0.959228		15.5738	0.960684		15.5738	0.961835		15.5738	0.960808
15.6483	0.95946		15.6483	0.959992		15.6483	0.961116		15.6483	0.960916		15.6483	0.962013		15.6483	0.960739		15.6483	0.964036		15.6483	0.961097		15.6483	0.959938		15.6483	0.962472		15.6483	0.961391		15.6483	0.959105		15.6483	0.959512		15.6483	0.960326		15.6483	0.959986		15.6483	0.961276		15.6483	0.960066
15.7228	0.960195		15.7228	0.960411		15.7228	0.96056		15.7228	0.961088		15.7228	0.962156		15.7228	0.961549		15.7228	0.963443		15.7228	0.961729		15.7228	0.959861		15.7228	0.962891		15.7228	0.961636		15.7228	0.959169		15.7228	0.95965		15.7228	0.959796		15.7228	0.960938		15.7228	0.962538		15.7228	0.960209
15.7973	0.959058		15.7973	0.961246		15.7973	0.960528		15.7973	0.960979		15.7973	0.961941		15.7973	0.960925		15.7973	0.963064		15.7973	0.960909		15.7973	0.959484		15.7973	0.96244		15.7973	0.960728		15.7973	0.959903		15.7973	0.959839		15.7973	0.961011		15.7973	0.961612		15.7973	0.962653		15.7973	0.960731
15.8718	0.960051		15.8718	0.959951		15.8718	0.960085		15.8718	0.960725		15.8718	0.961448		15.8718	0.96076		15.8718	0.962285		15.8718	0.961291		15.8718	0.959572		15.8718	0.962106		15.8718	0.960202		15.8718	0.960819		15.8718	0.960531		15.8718	0.961535		15.8718	0.961465		15.8718	0.961685		15.8718	0.961064
15.9463	0.959827		15.9463	0.960638		15.9463	0.961529		15.9463	0.96054		15.9463	0.961932		15.9463	0.961191		15.9463	0.961858		15.9463	0.961769		15.9463	0.961221		15.9463	0.961558		15.9463	0.96045		15.9463	0.960601		15.9463	0.959992		15.9463	0.961366		15.9463	0.962236		15.9463	0.960725		15.9463	0.960201
16.0209	0.959107		16.0209	0.961009		16.0209	0.961315		16.0209	0.96124		16.0209	0.962843		16.0209	0.962422		16.0209	0.962317		16.0209	0.96178		16.0209	0.961727		16.0209	0.960648		16.0209	0.959864		16.0209	0.959833		16.0209	0.959817		16.0209	0.961982		16.0209	0.961893		16.0209	0.961195		16.0209	0.959765
16.0954	0.95968		16.0954	0.960224		16.0954	0.960682		16.0954	0.961655		16.0954	0.961868		16.0954	0.963059		16.0954	0.963282		16.0954	0.961032		16.0954	0.9622		16.0954	0.962012		16.0954	0.959503		16.0954	0.959257		16.0954	0.960616		16.0954	0.961393		16.0954	0.960719		16.0954	0.96208		16.0954	0.95898
16.1699	0.959311		16.1699	0.960253		16.1699	0.960492		16.1699	0.96117		16.1699	0.961219		16.1699	0.962223		16.1699	0.962337		16.1699	0.961709		16.1699	0.961389		16.1699	0.961584		16.1699	0.959892		16.1699	0.95951		16.1699	0.960769		16.1699	0.961438		16.1699	0.961478		16.1699	0.962611		16.1699	0.959127
16.2444	0.958454		16.2444	0.960449		16.2444	0.959719		16.2444	0.961941		16.2444	0.959981		16.2444	0.962702		16.2444	0.962294		16.2444	0.962323		16.2444	0.96099		16.2444	0.961828		16.2444	0.960751		16.2444	0.958916		16.2444	0.961553		16.2444	0.960556		16.2444	0.961755		16.2444	0.961559		16.2444	0.959036
16.3189	0.95793		16.3189	0.959353		16.3189	0.959554		16.3189	0.960564		16.3189	0.959984		16.3189	0.962079		16.3189	0.962567		16.3189	0.962193		16.3189	0.961339		16.3189	0.961164		16.3189	0.96103		16.3189	0.958861		16.3189	0.961542		16.3189	0.959468		16.3189	0.961467		16.3189	0.961449		16.3189	0.958792
16.3934	0.958772		16.3934	0.959064		16.3934	0.95841		16.3934	0.962113		16.3934	0.960733		16.3934	0.961491		16.3934	0.961813		16.3934	0.960903		16.3934	0.962196		16.3934	0.961149		16.3934	0.961438		16.3934	0.959909		16.3934	0.961036		16.3934	0.959276		16.3934	0.960665		16.3934	0.962451		16.3934	0.958742
16.4679	0.958423		16.4679	0.958945		16.4679	0.958036		16.4679	0.962229		16.4679	0.960959		16.4679	0.962423		16.4679	0.961842		16.4679	0.961591		16.4679	0.960926		16.4679	0.960919		16.4679	0.960439		16.4679	0.960476		16.4679	0.960052		16.4679	0.958607		16.4679	0.960935		16.4679	0.962765		16.4679	0.958471
16.5425	0.959394		16.5425	0.958922		16.5425	0.959109		16.5425	0.961148		16.5425	0.960571		16.5425	0.963122		16.5425	0.961955		16.5425	0.960743		16.5425	0.960575		16.5425	0.96138		16.5425	0.959779		16.5425	0.959525		16.5425	0.960936		16.5425	0.958444		16.5425	0.961456		16.5425	0.962064		16.5425	0.958949
16.617	0.959693		16.617	0.959081		16.617	0.958952		16.617	0.960378		16.617	0.961333		16.617	0.961882		16.617	0.960765		16.617	0.961412		16.617	0.961761		16.617	0.960441		16.617	0.960755		16.617	0.959903		16.617	0.96141		16.617	0.958571		16.617	0.960318		16.617	0.961157		16.617	0.959504
16.6915	0.960247		16.6915	0.959836		16.6915	0.958814		16.6915	0.960426		16.6915	0.960611		16.6915	0.961967		16.6915	0.961408		16.6915	0.96053		16.6915	0.96026		16.6915	0.959718		16.6915	0.961431		16.6915	0.959414		16.6915	0.962091		16.6915	0.959878		16.6915	0.960408		16.6915	0.962264		16.6915	0.959746
16.766	0.959826		16.766	0.959771		16.766	0.959334		16.766	0.961107		16.766	0.960597		16.766	0.962336		16.766	0.961806		16.766	0.960822		16.766	0.959868		16.766	0.959104		16.766	0.961561		16.766	0.958975		16.766	0.96126		16.766	0.960607		16.766	0.959895		16.766	0.962417		16.766	0.960497
16.8405	0.959472		16.8405	0.959149		16.8405	0.958581		16.8405	0.9618		16.8405	0.960601		16.8405	0.962742		16.8405	0.961557		16.8405	0.960423		16.8405	0.959677		16.8405	0.960908		16.8405	0.960227		16.8405	0.958756		16.8405	0.960909		16.8405	0.960765		16.8405	0.958691		16.8405	0.963003		16.8405	0.961025
16.915	0.958808		16.915	0.960603		16.915	0.958484		16.915	0.961786		16.915	0.961244		16.915	0.963419		16.915	0.960831		16.915	0.959818		16.915	0.960169		16.915	0.961405		16.915	0.960914		16.915	0.95919		16.915	0.961766		16.915	0.961273		16.915	0.958344		16.915	0.962419		16.915	0.96173
16.9896	0.959618		16.9896	0.960919		16.9896	0.9589		16.9896	0.960867		16.9896	0.961737		16.9896	0.963054		16.9896	0.961011		16.9896	0.959551		16.9896	0.960701		16.9896	0.961166		16.9896	0.959192		16.9896	0.958879		16.9896	0.962306		16.9896	0.960591		16.9896	0.95823		16.9896	0.96216		16.9896	0.961985
17.0641	0.959597		17.0641	0.960913		17.0641	0.959122		17.0641	0.960206		17.0641	0.961981		17.0641	0.962929		17.0641	0.961112		17.0641	0.960682		17.0641	0.961793		17.0641	0.960314		17.0641	0.959555		17.0641	0.958674		17.0641	0.96218		17.0641	0.9586		17.0641	0.958165		17.0641	0.960968		17.0641	0.961061
17.1386	0.959091		17.1386	0.959958		17.1386	0.958609		17.1386	0.96061		17.1386	0.960617		17.1386	0.963158		17.1386	0.960908		17.1386	0.961673		17.1386	0.961919		17.1386	0.961185		17.1386	0.960422		17.1386	0.959535		17.1386	0.960959		17.1386	0.95881		17.1386	0.959347		17.1386	0.961317		17.1386	0.960916
17.2131	0.959482		17.2131	0.959243		17.2131	0.957926		17.2131	0.961002		17.2131	0.9609		17.2131	0.962334		17.2131	0.960964		17.2131	0.961801		17.2131	0.961677		17.2131	0.961197		17.2131	0.960993		17.2131	0.958537		17.2131	0.960429		17.2131	0.958842		17.2131	0.959209		17.2131	0.962261		17.2131	0.960141
17.2876	0.958782		17.2876	0.959507		17.2876	0.957862		17.2876	0.961017		17.2876	0.960851		17.2876	0.962727		17.2876	0.961678		17.2876	0.960371		17.2876	0.960779		17.2876	0.960628		17.2876	0.961753		17.2876	0.958733		17.2876	0.960427		17.2876	0.95811		17.2876	0.959811		17.2876	0.961644		17.2876	0.961075
17.3621	0.959146		17.3621	0.959639		17.3621	0.957524		17.3621	0.960883		17.3621	0.960608		17.3621	0.962385		17.3621	0.962316		17.3621	0.960033		17.3621	0.960361		17.3621	0.959637		17.3621	0.962541		17.3621	0.959121		17.3621	0.961062		17.3621	0.958088		17.3621	0.960304		17.3621	0.961699		17.3621	0.962013
17.4366	0.95811		17.4366	0.959107		17.4366	0.957437		17.4366	0.960349		17.4366	0.961001		17.4366	0.962876		17.4366	0.96311		17.4366	0.961125		17.4366	0.960493		17.4366	0.959553		17.4366	0.962491		17.4366	0.95865		17.4366	0.960116		17.4366	0.957603		17.4366	0.960014		17.4366	0.961328		17.4366	0.962375
17.5112	0.958665		17.5112	0.958669		17.5112	0.957883		17.5112	0.960765		17.5112	0.962097		17.5112	0.962039		17.5112	0.963552		17.5112	0.960033		17.5112	0.960762		17.5112	0.960201		17.5112	0.960855		17.5112	0.957713		17.5112	0.959613		17.5112	0.958043		17.5112	0.959863		17.5112	0.960939		17.5112	0.961907
17.5857	0.959141		17.5857	0.959867		17.5857	0.958986		17.5857	0.96051		17.5857	0.961174		17.5857	0.962734		17.5857	0.963336		17.5857	0.960006		17.5857	0.960345		17.5857	0.960582		17.5857	0.960117		17.5857	0.95797		17.5857	0.95922		17.5857	0.95811		17.5857	0.958824		17.5857	0.961697		17.5857	0.961122
17.6602	0.958429		17.6602	0.960747		17.6602	0.958568		17.6602	0.960015		17.6602	0.96086		17.6602	0.963051		17.6602	0.961981		17.6602	0.960702		17.6602	0.960823		17.6602	0.959759		17.6602	0.960074		17.6602	0.959086		17.6602	0.958924		17.6602	0.959058		17.6602	0.958413		17.6602	0.961255		17.6602	0.961833
17.7347	0.957685		17.7347	0.960283		17.7347	0.959111		17.7347	0.9611		17.7347	0.959658		17.7347	0.962294		17.7347	0.962342		17.7347	0.960213		17.7347	0.96165		17.7347	0.959674		17.7347	0.960405		17.7347	0.959749		17.7347	0.959203		17.7347	0.959787		17.7347	0.959265		17.7347	0.962562		17.7347	0.961455
17.8092	0.957651		17.8092	0.959897		17.8092	0.959147		17.8092	0.961091		17.8092	0.959367		17.8092	0.961401		17.8092	0.963035		17.8092	0.960336		17.8092	0.962089		17.8092	0.960603		17.8092	0.961334		17.8092	0.958773		17.8092	0.959034		17.8092	0.958557		17.8092	0.958652		17.8092	0.962857		17.8092	0.960771
17.8837	0.957071		17.8837	0.959313		17.8837	0.959716		17.8837	0.961584		17.8837	0.959133		17.8837	0.961737		17.8837	0.963555		17.8837	0.959698		17.8837	0.961737		17.8837	0.959496		17.8837	0.961013		17.8837	0.958867		17.8837	0.959152		17.8837	0.958823		17.8837	0.959254		17.8837	0.963144		17.8837	0.959625
17.9583	0.957586		17.9583	0.959492		17.9583	0.960395		17.9583	0.961247		17.9583	0.960641		17.9583	0.963324		17.9583	0.962427		17.9583	0.960651		17.9583	0.961043		17.9583	0.959438		17.9583	0.960832		17.9583	0.959274		17.9583	0.959869		17.9583	0.959574		17.9583	0.958718		17.9583	0.963437		17.9583	0.959502
18.0328	0.958001		18.0328	0.959764		18.0328	0.960775		18.0328	0.962084		18.0328	0.960982		18.0328	0.963031		18.0328	0.96351		18.0328	0.960096		18.0328	0.96121		18.0328	0.95996		18.0328	0.960716		18.0328	0.96018		18.0328	0.95968		18.0328	0.95864		18.0328	0.958513		18.0328	0.962985		18.0328	0.959183
18.1073	0.958965		18.1073	0.960242		18.1073	0.960482		18.1073	0.961673		18.1073	0.960086		18.1073	0.963607		18.1073	0.963468		18.1073	0.959863		18.1073	0.960099		18.1073	0.960794		18.1073	0.960792		18.1073	0.960264		18.1073	0.96062		18.1073	0.958414		18.1073	0.958359		18.1073	0.962235		18.1073	0.959192
18.1818	0.958455		18.1818	0.959868		18.1818	0.960249		18.1818	0.960527		18.1818	0.960173		18.1818	0.963433		18.1818	0.963708		18.1818	0.960841		18.1818	0.95975		18.1818	0.961637		18.1818	0.961718		18.1818	0.960521		18.1818	0.959637		18.1818	0.958404		18.1818	0.959353		18.1818	0.96165		18.1818	0.959961
18.2563	0.95965		18.2563	0.960141		18.2563	0.961209		18.2563	0.960491		18.2563	0.960448		18.2563	0.962468		18.2563	0.962889		18.2563	0.960733		18.2563	0.959266		18.2563	0.961764		18.2563	0.961016		18.2563	0.959614		18.2563	0.95936		18.2563	0.959305		18.2563	0.959472		18.2563	0.96064		18.2563	0.961218
18.3308	0.958743		18.3308	0.959908		18.3308	0.960642		18.3308	0.960674		18.3308	0.959183		18.3308	0.962858		18.3308	0.963395		18.3308	0.96		18.3308	0.959871		18.3308	0.961514		18.3308	0.960566		18.3308	0.95836		18.3308	0.959137		18.3308	0.959435		18.3308	0.95901		18.3308	0.960341		18.3308	0.961475
18.4054	0.958322		18.4054	0.960724		18.4054	0.959091		18.4054	0.961831		18.4054	0.959961		18.4054	0.962457		18.4054	0.963752		18.4054	0.9604		18.4054	0.961143		18.4054	0.960765		18.4054	0.959543		18.4054	0.957584		18.4054	0.959192		18.4054	0.960236		18.4054	0.958192		18.4054	0.96177		18.4054	0.962251
18.4799	0.958304		18.4799	0.960098		18.4799	0.959873		18.4799	0.961333		18.4799	0.960568		18.4799	0.962941		18.4799	0.963692		18.4799	0.960553		18.4799	0.961336		18.4799	0.960702		18.4799	0.959061		18.4799	0.957594		18.4799	0.960039		18.4799	0.960214		18.4799	0.95782		18.4799	0.962235		18.4799	0.961236
18.5544	0.957816		18.5544	0.959758		18.5544	0.959693		18.5544	0.961848		18.5544	0.960639		18.5544	0.961383		18.5544	0.962957		18.5544	0.961727		18.5544	0.960583		18.5544	0.960469		18.5544	0.959166		18.5544	0.958017		18.5544	0.96063		18.5544	0.960945		18.5544	0.957912		18.5544	0.962567		18.5544	0.961406
18.6289	0.958847		18.6289	0.960482		18.6289	0.959272		18.6289	0.962038		18.6289	0.96034		18.6289	0.961814		18.6289	0.962958		18.6289	0.961904		18.6289	0.960644		18.6289	0.960954		18.6289	0.958965		18.6289	0.958714		18.6289	0.96008		18.6289	0.959334		18.6289	0.959252		18.6289	0.962746		18.6289	0.962093
18.7034	0.959376		18.7034	0.959357		18.7034	0.960072		18.7034	0.960764		18.7034	0.960017		18.7034	0.962181		18.7034	0.962528		18.7034	0.962084		18.7034	0.960659		18.7034	0.961512		18.7034	0.960327		18.7034	0.960107		18.7034	0.960709		18.7034	0.959855		18.7034	0.960225		18.7034	0.962043		18.7034	0.962314
18.7779	0.958365		18.7779	0.9586		18.7779	0.960685		18.7779	0.960603		18.7779	0.960763		18.7779	0.961795		18.7779	0.963062		18.7779	0.96232		18.7779	0.960717		18.7779	0.961984		18.7779	0.960538		18.7779	0.959689		18.7779	0.962127		18.7779	0.959559		18.7779	0.960507		18.7779	0.962401		18.7779	0.961889
18.8524	0.95764		18.8524	0.959112		18.8524	0.961307		18.8524	0.961097		18.8524	0.959995		18.8524	0.961057		18.8524	0.962698		18.8524	0.961416		18.8524	0.959652		18.8524	0.96155		18.8524	0.959505		18.8524	0.959056		18.8524	0.962507		18.8524	0.959141		18.8524	0.960521		18.8524	0.962122		18.8524	0.96104
18.927	0.957414		18.927	0.959432		18.927	0.96082		18.927	0.960864		18.927	0.960718		18.927	0.960949		18.927	0.962109		18.927	0.961647		18.927	0.960124		18.927	0.960659		18.927	0.959053		18.927	0.960261		18.927	0.962679		18.927	0.960126		18.927	0.959976		18.927	0.962372		18.927	0.961411
19.0015	0.958561		19.0015	0.958425		19.0015	0.960223		19.0015	0.959761		19.0015	0.962015		19.0015	0.961184		19.0015	0.961401		19.0015	0.960601		19.0015	0.96068		19.0015	0.95953		19.0015	0.959611		19.0015	0.960196		19.0015	0.962077		19.0015	0.960585		19.0015	0.960133		19.0015	0.96141		19.0015	0.960611
19.076	0.959689		19.076	0.95905		19.076	0.960556		19.076	0.959662		19.076	0.960966		19.076	0.961589		19.076	0.961057		19.076	0.961565		19.076	0.960643		19.076	0.959592		19.076	0.960193		19.076	0.959214		19.076	0.961093		19.076	0.959151		19.076	0.959813		19.076	0.962367		19.076	0.959934
19.1505	0.959783		19.1505	0.95908		19.1505	0.960525		19.1505	0.960549		19.1505	0.961159		19.1505	0.961907		19.1505	0.960618		19.1505	0.961486		19.1505	0.961173		19.1505	0.960524		19.1505	0.960802		19.1505	0.958626		19.1505	0.960696		19.1505	0.958833		19.1505	0.960446		19.1505	0.962609		19.1505	0.960375
19.225	0.959786		19.225	0.958614		19.225	0.960303		19.225	0.960474		19.225	0.961156		19.225	0.962497		19.225	0.960986		19.225	0.960887		19.225	0.960448		19.225	0.959766		19.225	0.960124		19.225	0.959687		19.225	0.960033		19.225	0.958131		19.225	0.960808		19.225	0.962734		19.225	0.95977
19.2995	0.959577		19.2995	0.958557		19.2995	0.960187		19.2995	0.961162		19.2995	0.961817		19.2995	0.962165		19.2995	0.961916		19.2995	0.961219		19.2995	0.960109		19.2995	0.961059		19.2995	0.959739		19.2995	0.959394		19.2995	0.960825		19.2995	0.95843		19.2995	0.959822		19.2995	0.96226		19.2995	0.959432
19.3741	0.959638		19.3741	0.958408		19.3741	0.960556		19.3741	0.960651		19.3741	0.961806		19.3741	0.96176		19.3741	0.961199		19.3741	0.961386		19.3741	0.960874		19.3741	0.96123		19.3741	0.960354		19.3741	0.959115		19.3741	0.96181		19.3741	0.959324		19.3741	0.960424		19.3741	0.962537		19.3741	0.960518
19.4486	0.95967		19.4486	0.957948		19.4486	0.959962		19.4486	0.960814		19.4486	0.962004		19.4486	0.961341		19.4486	0.960951		19.4486	0.960913		19.4486	0.959962		19.4486	0.961373		19.4486	0.961197		19.4486	0.960134		19.4486	0.960984		19.4486	0.960069		19.4486	0.960238		19.4486	0.961839		19.4486	0.960766
19.5231	0.958354		19.5231	0.958941		19.5231	0.960953		19.5231	0.9612		19.5231	0.961531		19.5231	0.960984		19.5231	0.960441		19.5231	0.961603		19.5231	0.959931		19.5231	0.961881		19.5231	0.960504		19.5231	0.959903		19.5231	0.961166		19.5231	0.959321		19.5231	0.958967		19.5231	0.961887		19.5231	0.960552
19.5976	0.958277		19.5976	0.959013		19.5976	0.961399		19.5976	0.96135		19.5976	0.960927		19.5976	0.960799		19.5976	0.960405		19.5976	0.962033		19.5976	0.959625		19.5976	0.961904		19.5976	0.960527		19.5976	0.960309		19.5976	0.961646		19.5976	0.959994		19.5976	0.95873		19.5976	0.961702		19.5976	0.960609
19.6721	0.959047		19.6721	0.959363		19.6721	0.960975		19.6721	0.960323		19.6721	0.960185		19.6721	0.960475		19.6721	0.960398		19.6721	0.961765		19.6721	0.959775		19.6721	0.960669		19.6721	0.960698		19.6721	0.95965		19.6721	0.962093		19.6721	0.958572		19.6721	0.958667		19.6721	0.961824		19.6721	0.96145
19.7466	0.959277		19.7466	0.960117		19.7466	0.961433		19.7466	0.960036		19.7466	0.960652		19.7466	0.960422		19.7466	0.96033		19.7466	0.960942		19.7466	0.960964		19.7466	0.959839		19.7466	0.959883		19.7466	0.959472		19.7466	0.962157		19.7466	0.958585		19.7466	0.959642		19.7466	0.961039		19.7466	0.960639
19.8211	0.959343		19.8211	0.959295		19.8211	0.961678		19.8211	0.96011		19.8211	0.961092		19.8211	0.961524		19.8211	0.960216		19.8211	0.960981		19.8211	0.961575		19.8211	0.95944		19.8211	0.959327		19.8211	0.959224		19.8211	0.961124		19.8211	0.959597		19.8211	0.960032		19.8211	0.961197		19.8211	0.960548
19.8957	0.95931		19.8957	0.959285		19.8957	0.961626		19.8957	0.961004		19.8957	0.960239		19.8957	0.96101		19.8957	0.961562		19.8957	0.960732		19.8957	0.961695		19.8957	0.959927		19.8957	0.958812		19.8957	0.960322		19.8957	0.959884		19.8957	0.958841		19.8957	0.960666		19.8957	0.961923		19.8957	0.96037
19.9702	0.960427		19.9702	0.960135		19.9702	0.961266		19.9702	0.959881		19.9702	0.959516		19.9702	0.960706		19.9702	0.961575		19.9702	0.961106		19.9702	0.96191		19.9702	0.959587		19.9702	0.958946		19.9702	0.960192		19.9702	0.959472		19.9702	0.958458		19.9702	0.960424		19.9702	0.962093		19.9702	0.961108
20.0447	0.960632		20.0447	0.960038		20.0447	0.960848		20.0447	0.959458		20.0447	0.959176		20.0447	0.960492		20.0447	0.962787		20.0447	0.960048		20.0447	0.961446		20.0447	0.959821		20.0447	0.958556		20.0447	0.960373		20.0447	0.960965		20.0447	0.958577		20.0447	0.95987		20.0447	0.961614		20.0447	0.960341
20.1192	0.96027		20.1192	0.961022		20.1192	0.960379		20.1192	0.959153		20.1192	0.958641		20.1192	0.960424		20.1192	0.963466		20.1192	0.95947		20.1192	0.960665		20.1192	0.960136		20.1192	0.958318		20.1192	0.960858		20.1192	0.961684		20.1192	0.959231		20.1192	0.958186		20.1192	0.961749		20.1192	0.96152
20.1937	0.959188		20.1937	0.961525		20.1937	0.959786		20.1937	0.958884		20.1937	0.959243		20.1937	0.960356		20.1937	0.963208		20.1937	0.959532		20.1937	0.960895		20.1937	0.960754		20.1937	0.959425		20.1937	0.959971		20.1937	0.962144		20.1937	0.960176		20.1937	0.958305		20.1937	0.961401		20.1937	0.961206
20.2682	0.959335		20.2682	0.960346		20.2682	0.958963		20.2682	0.959071		20.2682	0.959998		20.2682	0.959915		20.2682	0.96228		20.2682	0.959296		20.2682	0.961006		20.2682	0.960396		20.2682	0.959119		20.2682	0.960384		20.2682	0.961786		20.2682	0.960421		20.2682	0.95958		20.2682	0.961465		20.2682	0.96019
20.3428	0.959377		20.3428	0.96061		20.3428	0.958673		20.3428	0.960272		20.3428	0.95938		20.3428	0.960312		20.3428	0.962004		20.3428	0.960479		20.3428	0.961701		20.3428	0.960886		20.3428	0.958803		20.3428	0.960053		20.3428	0.961429		20.3428	0.960683		20.3428	0.959573		20.3428	0.961243		20.3428	0.961188
20.4173	0.959065		20.4173	0.959936		20.4173	0.959152		20.4173	0.959939		20.4173	0.958855		20.4173	0.960465		20.4173	0.962133		20.4173	0.961308		20.4173	0.961987		20.4173	0.961533		20.4173	0.959719		20.4173	0.959709		20.4173	0.961287		20.4173	0.959628		20.4173	0.960086		20.4173	0.961477		20.4173	0.96152
20.4918	0.959215		20.4918	0.959897		20.4918	0.959064		20.4918	0.961259		20.4918	0.958835		20.4918	0.960193		20.4918	0.962014		20.4918	0.960114		20.4918	0.962702		20.4918	0.960493		20.4918	0.959138		20.4918	0.959737		20.4918	0.962235		20.4918	0.95885		20.4918	0.960446		20.4918	0.960747		20.4918	0.960339
20.5663	0.958289		20.5663	0.959449		20.5663	0.959732		20.5663	0.961508		20.5663	0.95939		20.5663	0.960955		20.5663	0.962549		20.5663	0.960403		20.5663	0.962744		20.5663	0.960429		20.5663	0.959267		20.5663	0.9586		20.5663	0.961465		20.5663	0.958952		20.5663	0.96088		20.5663	0.960646		20.5663	0.95986
20.6408	0.958251		20.6408	0.959071		20.6408	0.959998		20.6408	0.96232		20.6408	0.959784		20.6408	0.961025		20.6408	0.962239		20.6408	0.960509		20.6408	0.962698		20.6408	0.959701		20.6408	0.959971		20.6408	0.958284		20.6408	0.961727		20.6408	0.959459		20.6408	0.960091		20.6408	0.961483		20.6408	0.959722
20.7153	0.958467		20.7153	0.960145		20.7153	0.959377		20.7153	0.962286		20.7153	0.960039		20.7153	0.961876		20.7153	0.962859		20.7153	0.959896		20.7153	0.961863		20.7153	0.959191		20.7153	0.961058		20.7153	0.95786		20.7153	0.961676		20.7153	0.959534		20.7153	0.959852		20.7153	0.960512		20.7153	0.959922
20.7899	0.958288		20.7899	0.959194		20.7899	0.959418		20.7899	0.962902		20.7899	0.960696		20.7899	0.961109		20.7899	0.962082		20.7899	0.95928		20.7899	0.962785		20.7899	0.958967		20.7899	0.961163		20.7899	0.957591		20.7899	0.961104		20.7899	0.960219		20.7899	0.960513		20.7899	0.960897		20.7899	0.959342
20.8644	0.95909		20.8644	0.959359		20.8644	0.959619		20.8644	0.963533		20.8644	0.961811		20.8644	0.961084		20.8644	0.963021		20.8644	0.959069		20.8644	0.963172		20.8644	0.958992		20.8644	0.961336		20.8644	0.95805		20.8644	0.961576		20.8644	0.959827		20.8644	0.958898		20.8644	0.961342		20.8644	0.959677
20.9389	0.959367		20.9389	0.960517		20.9389	0.959397		20.9389	0.96345		20.9389	0.962236		20.9389	0.963014		20.9389	0.963954		20.9389	0.959664		20.9389	0.963427		20.9389	0.960836		20.9389	0.961217		20.9389	0.95942		20.9389	0.962999		20.9389	0.960484		20.9389	0.958943		20.9389	0.962264		20.9389	0.961286
21.0134	0.96411		21.0134	0.965116		21.0134	0.96418		21.0134	0.966895		21.0134	0.966308		21.0134	0.967374		21.0134	0.968515		21.0134	0.964373		21.0134	0.967069		21.0134	0.965766		21.0134	0.964614		21.0134	0.964038		21.0134	0.966638		21.0134	0.963883		21.0134	0.964361		21.0134	0.966748		21.0134	0.966055
21.0879	0.965786		21.0879	0.965958		21.0879	0.966876		21.0879	0.969158		21.0879	0.967348		21.0879	0.968796		21.0879	0.970725		21.0879	0.967531		21.0879	0.968703		21.0879	0.966235		21.0879	0.965755		21.0879	0.965464		21.0879	0.967592		21.0879	0.96504		21.0879	0.966861		21.0879	0.967961		21.0879	0.968287
21.1624	0.967991		21.1624	0.968612		21.1624	0.968235		21.1624	0.970774		21.1624	0.968407		21.1624	0.970508		21.1624	0.971944		21.1624	0.968396		21.1624	0.970238		21.1624	0.967586		21.1624	0.967719		21.1624	0.967144		21.1624	0.967746		21.1624	0.966213		21.1624	0.966892		21.1624	0.968587		21.1624	0.968925
21.2369	0.969179		21.2369	0.969954		21.2369	0.968301		21.2369	0.97195		21.2369	0.970127		21.2369	0.972351		21.2369	0.973224		21.2369	0.968714		21.2369	0.970016		21.2369	0.968798		21.2369	0.968723		21.2369	0.967954		21.2369	0.968573		21.2369	0.967181		21.2369	0.967147		21.2369	0.968634		21.2369	0.969833
21.3115	0.969827		21.3115	0.971353		21.3115	0.969506		21.3115	0.973451		21.3115	0.970888		21.3115	0.973463		21.3115	0.972383		21.3115	0.96931		21.3115	0.970272		21.3115	0.969278		21.3115	0.969853		21.3115	0.970154		21.3115	0.96974		21.3115	0.967639		21.3115	0.967562		21.3115	0.96949		21.3115	0.970218
21.386	0.970914		21.386	0.972092		21.386	0.970198		21.386	0.973809		21.386	0.971175		21.386	0.972745		21.386	0.972491		21.386	0.970258		21.386	0.970305		21.386	0.970029		21.386	0.970933		21.386	0.970741		21.386	0.97126		21.386	0.969068		21.386	0.968848		21.386	0.971856		21.386	0.970886
21.4605	0.97253		21.4605	0.972487		21.4605	0.970497		21.4605	0.973891		21.4605	0.972109		21.4605	0.973954		21.4605	0.972876		21.4605	0.97184		21.4605	0.971465		21.4605	0.969989		21.4605	0.972287		21.4605	0.970267		21.4605	0.971803		21.4605	0.970302		21.4605	0.969101		21.4605	0.972806		21.4605	0.971638
21.535	0.973265		21.535	0.973701		21.535	0.971643		21.535	0.973582		21.535	0.973711		21.535	0.974449		21.535	0.97419		21.535	0.971692		21.535	0.972083		21.535	0.970246		21.535	0.973094		21.535	0.971806		21.535	0.971422		21.535	0.97013		21.535	0.970369		21.535	0.972444		21.535	0.971674
21.6095	0.973318		21.6095	0.973123		21.6095	0.971411		21.6095	0.974492		21.6095	0.973856		21.6095	0.973902		21.6095	0.974083		21.6095	0.97341		21.6095	0.972453		21.6095	0.971689		21.6095	0.973133		21.6095	0.971742		21.6095	0.972463		21.6095	0.971103		21.6095	0.96988		21.6095	0.973739		21.6095	0.972156
21.684	0.973733		21.684	0.974125		21.684	0.973043		21.684	0.973637		21.684	0.973446		21.684	0.97435		21.684	0.975063		21.684	0.973816		21.684	0.972417		21.684	0.971959		21.684	0.973627		21.684	0.971894		21.684	0.973489		21.684	0.971888		21.684	0.970687		21.684	0.972991		21.684	0.973008
