# Supplementary material for: Energy coupling and stoichiometry of Zn2+/H+ antiport by the prokaryotic cation diffusion facilitator YiiP
Source: eLife. 2023 Oct 31;12:RP87167. doi: 10.7554/eLife.87167 (PMC10617992; doi:10.7554/eLife.87167)
Supplement: Figure 4—figure supplement 2—source data 1. [file elife-87167-fig4-figsupp2-data1.csv]

	Rep:0	Rep:1	Rep:2	Rep:3	Rep:4	Rep:5	Rep:6	Rep:7	Rep:8	Rep:9	Rep:10	Rep:11	Rep:12	Rep:13	Rep:14	Rep:15	Rep:16	Rep:17	Rep:18	Rep:19	Rep:20	Rep:21	Rep:22	Rep:23	Rep:24	Rep:25	Rep:26	Rep:27	Rep:28	Rep:29	frame
0	0	1	2	3	4	5	6	7	8	9	10	11	12	13	14	15	16	17	18	19	20	21	22	23	24	25	26	27	28	29	0
1	1	0	3	2	4	5	7	6	9	8	11	10	12	13	15	14	16	17	19	18	20	21	22	23	24	25	27	26	28	29	1
2	1	0	4	2	3	6	8	5	10	7	12	9	11	14	16	13	15	18	20	17	19	22	21	24	23	26	28	25	27	29	2
3	0	1	4	2	3	7	9	5	10	6	12	8	11	15	16	13	14	19	20	17	18	23	21	25	22	26	28	24	27	29	3
4	0	1	3	2	4	8	10	6	9	5	11	7	12	16	15	14	13	19	20	18	17	23	21	25	22	26	27	24	28	29	4
5	0	1	3	2	4	9	10	7	8	5	11	6	12	17	14	15	13	19	20	18	16	22	21	24	23	27	26	25	28	29	5
6	0	1	3	2	4	10	9	8	7	6	12	5	11	18	13	15	14	20	19	17	16	21	22	23	24	27	25	26	28	29	6
7	0	1	3	2	5	10	9	8	7	6	12	4	11	18	13	14	15	20	19	17	16	21	22	23	24	27	25	26	29	28	7
8	0	2	4	1	6	9	10	7	8	5	11	3	12	17	14	13	16	19	20	18	15	22	21	24	23	28	26	25	29	27	8
9	0	2	4	1	6	9	11	7	8	5	10	3	12	17	14	13	16	19	21	18	15	23	20	24	22	28	26	25	29	27	9
10	0	1	3	2	5	9	11	8	7	6	10	4	12	17	13	14	15	20	21	18	16	23	19	24	22	27	25	26	29	28	10
11	0	1	3	2	4	8	10	9	7	6	11	5	12	16	13	15	14	21	20	18	17	23	19	25	22	27	24	26	28	29	11
12	0	1	3	2	4	7	9	10	8	6	11	5	12	16	14	15	13	21	19	17	18	23	20	25	22	28	24	26	27	29	12
13	0	1	3	2	5	6	8	10	9	7	11	4	12	17	15	14	13	20	19	16	18	23	21	24	22	29	25	26	27	28	13
14	0	2	4	1	6	5	7	9	10	8	11	3	12	18	16	13	14	19	20	15	17	24	22	23	21	29	26	25	28	27	14
15	0	2	5	1	7	4	6	9	11	8	10	3	13	18	16	12	15	19	21	14	17	25	22	23	20	29	26	24	28	27	15
16	0	1	5	2	8	4	6	9	11	7	10	3	13	17	15	12	16	20	22	14	18	26	21	24	19	29	25	23	27	28	16
17	0	1	4	3	8	5	7	9	10	6	11	2	12	17	14	13	16	21	22	15	18	26	20	25	19	28	24	23	27	29	17
18	0	1	4	3	7	6	8	9	10	5	11	2	12	18	13	14	15	22	21	16	17	25	19	26	20	28	23	24	27	29	18
19	0	1	4	2	7	6	8	9	11	5	10	3	12	18	13	15	14	22	21	16	17	24	19	27	20	29	23	25	26	28	19
20	0	1	4	2	8	5	7	9	11	6	10	3	12	18	13	16	14	21	22	15	17	23	19	27	20	29	24	25	26	28	20
21	0	1	4	3	9	5	6	8	10	7	11	2	12	18	13	16	15	20	22	14	17	23	19	26	21	29	24	25	27	28	21
22	0	2	4	3	9	6	5	8	10	7	12	1	11	18	13	16	15	19	22	14	17	24	20	26	21	29	23	25	27	28	22
23	0	2	5	3	9	6	4	8	10	7	12	1	11	18	13	16	14	19	22	15	17	24	20	26	21	29	23	25	27	28	23
24	0	2	5	4	9	6	3	8	10	7	12	1	11	18	14	15	13	19	22	16	17	23	20	26	21	29	24	25	27	28	24
25	0	2	5	4	8	6	3	9	10	7	12	1	11	18	15	14	13	19	22	16	17	23	20	26	21	29	24	25	27	28	25
26	0	1	5	4	8	6	3	9	10	7	12	2	11	18	15	13	14	19	22	16	17	23	20	25	21	29	24	26	27	28	26
27	0	1	5	4	9	7	2	8	10	6	12	3	11	18	15	13	14	19	22	16	17	23	20	24	21	28	25	26	27	29	27
28	0	2	5	3	10	7	1	8	9	6	11	4	12	18	16	14	13	19	21	15	17	23	20	24	22	28	26	25	27	29	28
29	0	2	5	3	10	6	1	8	9	7	11	4	12	18	16	14	13	19	21	15	17	23	20	24	22	29	26	25	27	28	29
30	0	1	5	4	9	6	2	8	10	7	11	3	12	18	16	13	14	19	22	15	17	23	20	24	21	29	26	25	27	28	30
31	0	1	5	4	8	6	2	9	11	7	10	3	12	18	17	13	14	19	22	15	16	23	20	24	21	29	27	25	26	28	31
32	0	2	5	3	8	6	1	10	12	7	9	4	11	17	18	14	13	19	22	16	15	23	20	24	21	29	27	25	26	28	32
33	1	3	4	2	8	7	0	10	13	6	9	5	11	16	18	15	12	19	23	17	14	22	21	25	20	29	26	24	27	28	33
34	2	4	3	1	7	8	0	9	13	6	10	5	12	16	17	15	11	19	23	18	14	21	22	26	20	29	25	24	27	28	34
35	2	4	3	1	7	8	0	9	12	6	10	5	13	17	16	14	11	19	23	18	15	21	22	26	20	29	25	24	27	28	35
36	1	3	4	2	8	7	0	10	11	6	9	5	14	18	15	13	12	19	24	17	16	22	21	25	20	29	26	23	27	28	36
37	0	2	4	3	8	7	1	10	11	6	9	5	14	18	15	13	12	19	24	17	16	22	21	25	20	28	27	23	26	29	37
38	0	2	4	3	8	7	1	9	11	6	10	5	13	18	16	14	12	19	23	17	15	22	21	25	20	28	27	24	26	29	38
39	0	2	4	3	8	6	1	9	10	7	11	5	13	18	16	14	12	19	23	17	15	22	21	25	20	29	27	24	26	28	39
40	0	1	4	3	7	6	2	10	9	8	12	5	14	18	16	13	11	19	24	17	15	21	22	26	20	29	27	23	25	28	40
41	1	0	5	2	6	7	3	11	9	8	12	4	15	19	17	13	10	18	24	16	14	21	23	27	20	28	26	22	25	29	41
42	1	0	5	2	6	7	3	11	9	8	12	4	15	19	17	13	10	18	24	16	14	21	23	27	20	28	26	22	25	29	42
43	0	1	4	2	6	7	3	10	9	8	12	5	14	19	17	13	11	18	24	16	15	21	22	26	20	29	27	23	25	28	43
44	0	2	3	1	5	8	4	9	10	7	11	6	13	19	17	14	12	18	23	16	15	22	21	25	20	29	27	24	26	28	44
45	1	2	3	0	5	8	4	9	10	7	11	6	13	18	17	15	12	19	23	16	14	22	21	25	20	29	27	24	26	28	45
46	1	2	4	0	6	7	3	10	9	8	12	5	13	18	17	15	11	19	23	16	14	22	21	25	20	29	27	24	26	28	46
47	0	3	5	1	6	7	2	10	9	8	13	4	12	19	16	14	11	18	23	17	15	22	21	24	20	28	26	25	27	29	47
48	0	3	5	1	6	7	2	9	10	8	13	4	12	19	16	14	11	18	23	17	15	21	22	24	20	28	26	25	27	29	48
49	1	2	4	0	7	6	3	8	11	9	12	5	13	18	17	15	10	19	22	16	14	20	23	25	21	29	27	24	26	28	49
50	1	2	4	0	7	6	3	8	11	9	12	5	13	18	17	15	10	19	22	16	14	20	23	25	21	29	27	24	26	28	50
51	1	3	5	0	6	7	2	9	10	8	12	4	13	18	16	14	11	19	23	17	15	21	22	24	20	28	27	25	26	29	51
52	2	4	5	0	6	7	1	10	9	8	11	3	14	18	16	13	12	20	23	17	15	22	21	24	19	28	27	26	25	29	52
53	2	5	4	1	6	7	0	10	9	8	11	3	15	19	16	13	12	20	23	17	14	22	21	24	18	28	27	26	25	29	53
54	2	5	3	1	6	7	0	10	9	8	12	4	15	19	16	13	11	20	23	17	14	21	22	24	18	28	27	26	25	29	54
55	2	4	3	0	6	7	1	10	9	8	12	5	14	18	16	13	11	20	22	17	15	21	23	24	19	28	27	26	25	29	55
56	2	3	4	0	6	7	1	9	10	8	11	5	13	18	16	14	12	20	22	17	15	21	23	24	19	28	27	26	25	29	56
57	2	3	4	0	6	7	1	8	10	9	11	5	13	19	16	14	12	20	23	17	15	21	22	24	18	28	27	26	25	29	57
58	1	3	4	0	6	7	2	8	10	9	11	5	13	19	16	14	12	20	23	17	15	21	22	24	18	28	27	26	25	29	58
59	1	3	4	0	6	7	2	9	10	8	11	5	13	18	16	14	12	20	23	17	15	21	22	24	19	28	27	26	25	29	59
60	2	4	3	0	5	7	1	10	9	8	12	6	14	18	16	13	11	20	23	17	15	21	22	24	19	28	27	25	26	29	60
61	2	4	3	1	5	7	0	10	9	8	12	6	14	18	16	13	11	20	22	17	15	21	23	24	19	28	27	25	26	29	61
62	2	3	4	1	5	7	0	9	10	8	11	6	13	18	16	14	12	20	22	17	15	21	23	24	19	28	27	25	26	29	62
63	2	3	5	0	4	7	1	8	10	9	11	6	12	19	16	15	13	20	23	17	14	21	22	24	18	29	27	25	26	28	63
64	2	3	5	0	4	7	1	8	10	9	12	6	11	19	16	15	13	20	23	17	14	21	22	24	18	29	27	26	25	28	64
65	2	3	4	1	5	7	0	8	10	9	12	6	11	18	16	14	13	20	23	17	15	21	22	24	19	28	27	26	25	29	65
66	2	3	4	1	6	7	0	8	10	9	11	5	12	18	16	14	13	19	23	17	15	21	22	24	20	28	27	26	25	29	66
67	2	3	4	0	6	7	1	8	10	9	11	5	12	18	16	14	13	19	23	17	15	21	22	25	20	29	27	26	24	28	67
68	1	3	4	0	6	8	2	7	10	9	12	5	11	18	16	13	14	20	23	17	15	21	22	26	19	29	27	25	24	28	68
69	1	3	4	0	6	8	2	7	10	9	12	5	11	18	16	13	14	21	23	17	15	20	22	26	19	28	27	25	24	29	69
70	1	3	4	0	5	7	2	8	10	9	11	6	12	18	16	14	13	21	23	17	15	20	22	25	19	28	27	26	24	29	70
71	1	3	4	0	5	7	2	9	10	8	11	6	12	19	16	14	13	20	22	17	15	21	23	25	18	28	27	26	24	29	71
72	2	4	3	0	6	8	1	9	10	7	12	5	11	20	16	13	14	19	22	17	15	21	24	26	18	28	27	25	23	29	72
73	2	4	3	0	6	9	1	8	10	7	12	5	11	20	16	13	14	18	23	17	15	21	24	26	19	28	27	25	22	29	73
74	1	3	4	0	6	9	2	7	10	8	11	5	12	19	16	14	13	18	23	17	15	21	24	25	20	28	27	26	22	29	74
75	1	3	4	0	6	9	2	7	10	8	11	5	12	19	16	14	13	18	22	17	15	21	24	25	20	28	27	26	23	29	75
76	2	3	4	0	5	10	1	8	9	7	11	6	12	19	16	13	14	18	22	17	15	21	24	25	20	28	27	26	23	29	76
77	2	3	4	0	5	10	1	8	9	7	11	6	12	19	16	13	14	18	23	17	15	21	24	25	20	28	27	26	22	29	77
78	1	3	4	0	6	10	2	7	9	8	11	5	12	19	16	13	14	18	23	17	15	21	24	25	20	28	27	26	22	29	78
79	0	3	4	1	6	10	2	7	8	9	11	5	13	18	16	12	15	19	22	17	14	20	24	25	21	28	27	26	23	29	79
80	0	3	4	1	6	9	2	7	8	10	11	5	13	18	16	12	15	19	22	17	14	20	23	26	21	28	27	25	24	29	80
81	1	3	4	0	6	8	2	7	9	10	11	5	12	19	16	13	14	18	22	17	15	21	23	26	20	28	27	25	24	29	81
82	2	3	4	0	6	7	1	8	9	10	11	5	12	19	16	13	14	18	22	17	15	21	24	25	20	28	27	26	23	29	82
83	2	3	4	1	6	7	0	8	9	10	11	5	12	19	16	13	14	18	22	17	15	21	24	25	20	28	27	26	23	29	83
84	2	3	4	1	5	7	0	8	10	9	11	6	12	20	16	14	13	18	22	17	15	21	23	26	19	27	28	25	24	29	84
85	3	2	4	0	5	7	1	9	11	8	10	6	13	20	16	15	12	18	23	17	14	21	22	27	19	26	28	25	24	29	85
86	3	1	4	0	6	8	2	10	11	7	9	5	14	19	16	15	12	17	24	18	13	22	21	27	20	25	28	26	23	29	86
87	3	1	4	0	6	8	2	10	11	7	9	5	15	19	16	14	12	17	24	18	13	22	21	27	20	25	28	26	23	29	87
88	4	2	3	0	5	7	1	9	12	8	10	6	15	20	16	13	11	18	23	17	14	21	22	27	19	26	28	25	24	29	88
89	4	2	3	0	5	7	1	8	12	9	10	6	14	20	16	13	11	18	23	17	15	21	22	26	19	27	28	25	24	29	89
90	3	2	4	0	5	7	1	8	11	9	10	6	14	20	16	13	12	18	23	17	15	21	22	26	19	27	28	25	24	29	90
91	2	3	4	1	5	7	0	8	10	9	11	6	14	20	16	12	13	18	23	17	15	21	22	27	19	26	28	25	24	29	91
92	2	3	4	1	6	7	0	8	10	9	11	5	13	20	16	12	14	17	24	18	15	22	21	27	19	25	28	26	23	29	92
93	3	2	4	0	6	7	1	9	11	8	10	5	12	21	16	13	15	17	24	19	14	23	20	26	18	25	28	27	22	29	93
94	3	2	4	0	5	7	1	9	11	8	10	6	12	21	16	13	15	17	24	19	14	23	20	25	18	26	28	27	22	29	94
95	2	3	4	1	5	7	0	8	10	9	11	6	13	20	16	12	14	17	24	18	15	22	21	25	19	27	28	26	23	29	95
96	2	3	4	1	6	7	0	8	10	9	11	5	13	20	16	12	14	17	23	18	15	21	22	26	19	27	28	25	24	29	96
97	2	3	4	0	6	7	1	8	11	9	10	5	12	20	16	13	15	17	23	18	14	21	22	27	19	26	28	25	24	29	97
98	2	3	4	0	5	8	1	7	11	9	10	6	12	20	16	14	15	18	24	17	13	22	21	28	19	26	27	25	23	29	98
99	3	2	4	0	5	8	1	7	11	9	10	6	12	20	16	15	14	18	24	17	13	22	21	28	19	27	26	25	23	29	99
100	3	2	4	0	5	7	1	8	11	9	10	6	12	20	16	15	13	18	23	17	14	21	22	27	19	28	26	25	24	29	100
101	3	2	4	0	5	7	1	8	11	9	10	6	12	20	16	15	13	18	23	17	14	21	22	26	19	28	27	25	24	29	101
102	3	2	4	0	6	8	1	7	11	10	9	5	12	20	16	15	14	18	24	17	13	22	21	25	19	28	27	26	23	29	102
103	2	3	4	0	6	8	1	7	11	10	9	5	12	20	17	15	14	18	24	16	13	22	21	25	19	28	27	26	23	29	103
104	1	3	4	0	5	7	2	8	12	9	10	6	11	19	18	15	13	17	23	16	14	21	22	26	20	27	28	25	24	29	104
105	1	3	4	0	5	7	2	8	12	9	10	6	11	19	18	14	13	17	23	16	15	21	22	26	20	27	28	25	24	29	105
106	2	3	4	0	6	7	1	8	11	9	10	5	12	20	18	14	13	17	24	16	15	21	22	25	19	28	27	26	23	29	106
107	3	2	4	0	6	7	1	8	11	9	10	5	12	20	18	14	13	17	24	16	15	21	22	25	19	28	26	27	23	29	107
108	3	2	4	0	5	7	1	8	12	10	9	6	11	20	17	14	13	18	24	16	15	22	21	26	19	28	25	27	23	29	108
109	2	3	4	1	5	7	0	8	13	10	9	6	11	20	17	15	12	18	24	16	14	23	21	27	19	28	25	26	22	29	109
110	2	3	4	1	6	8	0	7	14	9	10	5	12	19	18	15	11	17	24	16	13	23	22	27	20	28	26	25	21	29	110
111	2	3	4	0	6	8	1	7	14	9	10	5	12	19	18	15	11	17	24	16	13	22	23	26	20	28	27	25	21	29	111
112	2	3	4	0	5	7	1	8	13	10	9	6	11	20	17	15	12	18	23	16	14	21	24	25	19	28	27	26	22	29	112
113	2	3	5	0	4	7	1	8	13	11	9	6	10	20	17	15	12	18	22	16	14	21	24	25	19	28	26	27	23	29	113
114	2	3	5	0	4	8	1	7	14	11	9	6	10	20	18	15	12	17	22	16	13	21	24	26	19	28	25	27	23	29	114
115	3	2	5	0	4	8	1	7	14	11	9	6	10	21	18	15	12	17	23	16	13	20	24	26	19	28	25	27	22	29	115
116	3	2	5	0	4	8	1	7	14	11	9	6	10	21	17	15	12	18	23	16	13	20	24	25	19	28	26	27	22	29	116
117	3	2	5	0	4	9	1	7	15	11	8	6	10	20	17	14	13	19	23	16	12	21	24	25	18	28	27	26	22	29	117
118	3	2	5	0	4	9	1	7	15	11	8	6	10	20	17	14	13	19	24	16	12	22	23	26	18	28	27	25	21	29	118
119	2	3	4	1	5	8	0	6	14	10	9	7	11	20	16	15	12	18	24	17	13	22	23	27	19	28	26	25	21	29	119
120	2	3	4	1	5	8	0	6	13	10	9	7	11	20	16	15	12	17	23	18	14	21	24	27	19	28	26	25	22	29	120
121	3	2	5	0	4	9	1	7	13	11	8	6	10	21	17	14	12	16	22	18	15	20	24	26	19	28	27	25	23	29	121
122	3	2	5	0	4	9	1	7	14	11	8	6	10	21	17	13	12	16	22	18	15	20	24	26	19	28	27	25	23	29	122
123	2	3	4	1	5	8	0	7	15	10	9	6	11	20	16	13	12	17	23	18	14	21	25	27	19	28	26	24	22	29	123
124	2	3	4	1	5	8	0	7	15	10	9	6	11	20	16	14	12	17	23	18	13	21	25	27	19	28	26	24	22	29	124
125	3	2	5	0	4	9	1	6	14	11	8	7	10	21	17	15	13	16	22	18	12	20	24	26	19	28	27	25	23	29	125
126	3	2	5	0	4	9	1	6	14	11	8	7	10	21	17	15	13	16	22	18	12	20	24	26	19	28	27	25	23	29	126
127	2	3	4	0	5	8	1	7	15	11	9	6	10	20	17	14	12	16	23	18	13	21	24	27	19	28	26	25	22	29	127
128	2	3	4	0	5	8	1	7	15	11	9	6	10	20	17	14	12	16	24	18	13	21	23	27	19	28	26	25	22	29	128
129	2	3	5	0	4	9	1	7	15	11	8	6	10	20	16	14	13	17	24	18	12	21	23	26	19	28	27	25	22	29	129
130	2	3	5	0	4	9	1	7	15	12	8	6	10	20	16	14	13	17	24	18	11	21	23	25	19	28	27	26	22	29	130
131	3	2	4	1	5	8	0	6	14	13	9	7	10	20	17	15	12	16	25	19	11	21	22	24	18	28	26	27	23	29	131
132	3	2	4	1	5	8	0	6	14	13	9	7	10	20	17	15	12	16	25	19	11	21	22	24	18	28	26	27	23	29	132
133	2	3	5	0	4	9	1	7	15	12	8	6	10	20	16	14	13	17	24	19	11	21	22	25	18	28	27	26	23	29	133
134	1	3	5	0	4	9	2	7	15	11	8	6	10	20	16	13	14	18	24	19	12	22	21	26	17	28	27	25	23	29	134
135	1	3	4	0	5	8	2	7	14	11	9	6	10	20	17	13	15	18	24	19	12	23	21	27	16	28	26	25	22	29	135
136	2	3	4	0	6	7	1	8	13	12	9	5	10	20	18	14	15	17	24	19	11	23	22	27	16	28	25	26	21	29	136
137	2	3	4	0	6	7	1	8	13	12	9	5	10	20	18	15	14	17	24	19	11	22	23	26	16	28	25	27	21	29	137
138	2	3	4	0	5	7	1	8	14	12	9	6	10	20	17	15	13	18	24	19	11	21	23	25	16	28	26	27	22	29	138
139	2	3	4	0	5	7	1	8	15	13	9	6	10	20	16	14	12	18	24	19	11	21	22	25	17	28	27	26	23	29	139
140	2	3	4	0	5	7	1	8	15	13	9	6	10	19	16	14	12	18	24	20	11	21	22	26	17	28	27	25	23	29	140
141	2	3	4	0	5	6	1	9	14	12	8	7	10	19	17	15	13	18	25	20	11	21	23	27	16	29	26	24	22	28	141
142	2	3	4	0	5	6	1	9	14	12	8	7	10	20	17	15	13	18	25	19	11	21	23	27	16	29	26	24	22	28	142
143	2	3	4	0	5	7	1	9	14	13	8	6	10	20	16	15	12	18	24	19	11	21	22	26	17	28	27	25	23	29	143
144	2	3	4	0	5	7	1	9	14	13	8	6	10	20	16	15	11	18	24	19	12	21	22	25	17	28	27	26	23	29	144
145	2	3	5	0	4	6	1	8	15	12	9	7	10	20	17	14	11	19	24	18	13	21	23	25	16	29	26	27	22	28	145
146	1	3	5	0	4	6	2	8	15	11	9	7	10	20	17	14	12	19	24	18	13	21	23	26	16	29	25	27	22	28	146
147	1	3	4	0	5	7	2	9	14	11	8	6	10	20	16	15	13	18	24	19	12	21	22	27	17	28	25	26	23	29	147
148	2	3	4	0	5	7	1	9	14	12	8	6	10	20	16	15	13	18	24	19	11	21	22	27	17	28	26	25	23	29	148
149	2	3	5	0	4	7	1	8	14	13	9	6	10	20	17	15	12	19	24	18	11	21	23	26	16	29	27	25	22	28	149
150	2	3	5	0	4	7	1	8	14	13	9	6	10	20	17	15	11	19	23	18	12	21	24	25	16	29	27	26	22	28	150
151	2	3	4	0	5	6	1	8	14	12	9	7	10	21	16	15	11	18	22	19	13	20	24	25	17	29	26	27	23	28	151
152	2	3	4	0	5	6	1	8	13	12	9	7	10	21	16	15	11	17	22	19	14	20	24	26	18	29	25	27	23	28	152
153	2	3	5	0	4	7	1	8	12	13	9	6	10	20	16	15	11	17	23	18	14	21	24	27	19	29	25	26	22	28	153
154	2	3	5	0	4	7	1	8	11	14	9	6	10	20	16	15	12	18	24	17	13	21	23	27	19	29	26	25	22	28	154
155	2	3	5	0	4	6	1	8	11	14	9	7	10	20	16	15	12	18	24	17	13	21	23	27	19	28	26	25	22	29	155
156	1	3	5	0	4	6	2	8	12	13	10	7	9	20	15	16	11	17	23	18	14	21	24	27	19	28	25	26	22	29	156
157	1	3	5	0	4	6	2	8	12	13	10	7	9	20	15	16	11	17	23	18	14	21	24	26	19	28	25	27	22	29	157
158	2	3	5	0	4	6	1	8	12	13	10	7	9	20	15	16	11	17	24	18	14	21	23	26	19	28	25	27	22	29	158
159	2	3	5	0	4	6	1	8	12	13	10	7	9	20	15	17	11	16	24	19	14	21	23	27	18	28	25	26	22	29	159
160	2	3	6	0	4	5	1	8	11	13	10	7	9	20	15	17	12	16	24	19	14	21	23	27	18	28	25	26	22	29	160
161	2	3	6	0	5	4	1	8	11	12	10	7	9	21	15	16	13	17	24	19	14	20	23	26	18	28	25	27	22	29	161
162	2	3	6	0	5	4	1	8	11	12	10	7	9	21	15	16	13	18	24	19	14	20	23	26	17	28	25	27	22	29	162
163	2	3	6	0	4	5	1	8	11	13	10	7	9	21	15	16	12	18	24	19	14	20	22	26	17	28	25	27	23	29	163
164	1	3	6	0	4	5	2	8	12	14	9	7	10	21	15	16	11	17	24	19	13	20	22	25	18	28	26	27	23	29	164
165	0	3	7	1	5	4	2	9	13	15	8	6	10	20	14	17	11	16	24	19	12	21	23	25	18	28	27	26	22	29	165
166	0	4	7	2	6	3	1	10	14	15	8	5	9	20	13	18	12	16	23	19	11	22	24	26	17	27	28	25	21	29	166
167	1	4	7	2	6	3	0	10	14	15	8	5	9	20	13	18	12	16	23	19	11	22	24	26	17	27	28	25	21	29	167
168	2	3	7	1	5	4	0	9	13	15	8	6	10	20	14	18	11	16	24	19	12	21	23	25	17	28	27	26	22	29	168
169	2	3	6	0	4	5	1	8	13	14	9	7	10	21	15	18	11	16	24	19	12	20	23	25	17	28	26	27	22	29	169
170	1	3	5	0	4	6	2	8	13	14	10	7	9	21	15	18	12	16	24	19	11	20	23	26	17	28	25	27	22	29	170
171	1	3	5	0	4	6	2	8	12	15	10	7	9	20	14	18	13	16	24	19	11	21	22	27	17	28	25	26	23	29	171
172	2	3	6	0	4	5	1	8	12	15	9	7	10	20	14	18	13	16	24	19	11	21	22	27	17	28	25	26	23	29	172
173	2	3	6	0	5	4	1	9	13	14	8	7	10	21	15	18	12	17	24	19	11	20	23	26	16	28	25	27	22	29	173
174	1	3	5	0	6	4	2	10	13	14	8	7	9	21	15	18	11	17	23	19	12	20	24	25	16	28	26	27	22	29	174
175	1	3	4	0	6	5	2	10	13	15	8	7	9	20	14	19	11	16	22	18	12	21	24	25	17	28	27	26	23	29	175
176	2	3	4	0	5	6	1	9	13	16	8	7	10	20	14	19	12	15	22	18	11	21	24	25	17	28	27	26	23	29	176
177	3	2	5	0	4	6	1	8	12	16	9	7	10	21	15	18	13	14	23	19	11	20	24	25	17	28	26	27	22	29	177
178	3	2	6	0	4	5	1	8	12	16	9	7	10	21	15	18	13	14	23	19	11	20	24	26	17	28	25	27	22	29	178
179	2	3	6	0	5	4	1	9	13	16	8	7	10	20	14	18	12	15	22	19	11	21	24	26	17	28	25	27	23	29	179
180	2	3	5	0	6	4	1	9	13	15	8	7	10	20	14	18	12	16	22	19	11	21	24	26	17	28	25	27	23	29	180
181	2	3	5	0	6	4	1	9	13	15	8	7	10	20	14	19	12	16	23	18	11	21	24	26	17	28	25	27	22	29	181
182	2	3	6	0	5	4	1	10	13	16	8	7	9	19	14	20	12	15	24	18	11	21	23	26	17	28	25	27	22	29	182
183	2	3	7	0	5	4	1	10	12	16	8	6	9	19	15	20	13	14	24	18	11	21	23	26	17	29	25	27	22	28	183
184	1	3	7	0	6	4	2	9	11	15	8	5	10	20	16	19	13	14	23	17	12	22	24	25	18	29	26	27	21	28	184
185	1	3	7	0	6	4	2	8	11	14	9	5	10	20	16	19	13	15	23	17	12	22	24	25	18	28	26	27	21	29	185
186	2	3	7	0	5	4	1	8	12	14	10	6	9	20	15	19	13	16	24	18	11	21	23	26	17	28	25	27	22	29	186
187	2	3	6	0	4	5	1	9	13	15	10	7	8	21	14	19	12	16	24	18	11	20	23	27	17	29	25	26	22	28	187
188	2	3	6	0	4	5	1	9	13	16	10	7	8	21	14	19	11	15	24	18	12	20	23	27	17	29	25	26	22	28	188
189	2	3	6	0	5	4	1	8	13	16	10	7	9	21	14	19	11	15	24	18	12	20	23	26	17	29	25	27	22	28	189
190	2	3	6	0	5	4	1	8	13	16	10	7	9	21	14	19	11	15	24	18	12	20	23	26	17	29	25	27	22	28	190
191	2	3	6	0	5	4	1	8	13	16	10	7	9	21	15	19	11	14	24	18	12	20	23	26	17	29	25	27	22	28	191
192	2	3	6	0	5	4	1	8	13	16	9	7	10	21	15	19	12	14	24	18	11	20	23	26	17	29	25	27	22	28	192
193	2	3	7	1	5	4	0	8	13	16	9	6	10	21	14	19	12	15	24	18	11	20	22	26	17	29	25	27	23	28	193
194	2	3	7	1	5	4	0	8	14	16	10	6	9	21	13	19	11	15	24	18	12	20	22	26	17	29	25	27	23	28	194
195	2	3	6	0	5	4	1	8	14	16	10	7	9	21	13	19	11	15	24	18	12	20	23	26	17	29	25	27	22	28	195
196	2	3	6	0	5	4	1	8	13	16	9	7	10	21	14	19	12	15	24	18	11	20	23	25	17	29	26	27	22	28	196
197	2	3	6	0	4	5	1	8	13	16	9	7	10	21	14	19	12	15	24	18	11	20	23	25	17	29	26	27	22	28	197
198	2	3	6	0	4	5	1	8	13	16	10	7	9	21	14	19	11	15	23	18	12	20	24	25	17	29	26	27	22	28	198
199	2	3	7	1	5	4	0	9	12	17	10	6	8	20	15	19	11	14	23	18	13	21	24	25	16	29	27	26	22	28	199
200	2	3	7	1	5	4	0	9	12	17	10	6	8	20	15	19	11	14	24	18	13	21	23	25	16	29	27	26	22	28	200
201	2	3	6	0	4	5	1	8	13	16	10	7	9	20	14	19	11	15	24	18	12	21	22	25	17	29	26	27	23	28	201
202	1	3	5	0	4	6	2	7	13	16	10	8	9	20	14	19	11	15	23	17	12	22	21	25	18	29	26	27	24	28	202
203	1	3	4	0	5	6	2	7	12	16	10	8	9	20	15	19	11	14	22	17	13	23	21	25	18	28	27	26	24	29	203
204	2	3	4	0	6	5	1	8	12	16	10	7	9	19	15	20	11	14	21	17	13	23	22	25	18	28	27	26	24	29	204
205	2	3	5	1	6	4	0	9	13	16	10	7	8	19	14	20	11	15	21	17	12	22	23	25	18	29	26	27	24	28	205
206	2	3	6	1	5	4	0	9	13	16	10	7	8	19	14	20	11	15	22	18	12	21	23	25	17	29	26	28	24	27	206
207	2	3	6	0	4	5	1	8	13	16	10	7	9	19	15	20	11	14	23	18	12	21	22	25	17	29	26	28	24	27	207
208	2	3	5	0	4	6	1	8	13	16	10	7	9	19	15	20	11	14	23	18	12	21	22	25	17	29	26	28	24	27	208
209	2	3	4	1	5	7	0	9	12	16	10	6	8	19	15	20	11	14	22	18	13	21	23	25	17	29	27	28	24	26	209
210	2	3	4	1	5	7	0	9	12	16	10	6	8	19	15	20	11	14	21	17	13	22	23	25	18	29	27	28	24	26	210
211	2	3	5	0	4	6	1	9	13	16	10	7	8	19	14	20	11	15	21	17	12	23	22	25	18	29	26	28	24	27	211
212	1	3	6	0	4	5	2	9	13	16	10	7	8	19	14	20	12	15	22	18	11	23	21	25	17	29	26	27	24	28	212
213	0	3	7	1	5	4	2	8	12	16	10	6	9	18	15	20	13	14	23	19	11	22	21	25	17	29	27	26	24	28	213
214	0	3	7	2	5	4	1	8	11	15	10	6	9	18	16	20	13	14	23	19	12	21	22	25	17	29	28	26	24	27	214
215	1	3	6	2	4	5	0	9	11	15	10	7	8	19	16	20	12	14	22	18	13	21	23	25	17	29	28	27	24	26	215
216	2	3	5	1	4	6	0	10	12	16	9	7	8	19	15	20	11	14	22	18	13	21	23	25	17	29	27	28	24	26	216
217	2	3	5	0	4	7	1	10	13	16	9	6	8	19	15	20	11	14	23	18	12	21	22	25	17	29	26	28	24	27	217
218	1	3	6	0	4	7	2	10	14	16	9	5	8	19	15	20	12	13	23	17	11	22	21	26	18	29	25	27	24	28	218
219	1	3	6	0	4	7	2	10	14	16	9	5	8	19	15	20	12	13	22	17	11	23	21	26	18	28	25	27	24	29	219
220	2	3	5	0	4	7	1	10	13	16	9	6	8	19	15	20	12	14	21	18	11	23	22	25	17	28	26	27	24	29	220
221	2	3	4	1	5	6	0	11	12	16	8	7	9	18	14	20	13	15	21	19	10	22	23	24	17	29	27	26	25	28	221
222	2	3	4	1	5	6	0	11	12	16	8	7	9	18	14	20	13	15	22	19	10	21	23	24	17	29	28	26	25	27	222
223	2	3	5	0	4	7	1	10	13	16	9	6	8	19	15	20	12	14	23	18	11	21	22	24	17	29	28	27	25	26	223
224	1	3	5	0	4	7	2	10	13	16	9	6	8	19	15	20	12	14	23	18	11	21	22	24	17	29	27	28	25	26	224
225	1	3	4	0	5	6	2	10	13	16	9	7	8	18	14	21	12	15	22	19	11	20	23	24	17	28	27	29	25	26	225
226	2	3	4	0	6	5	1	10	13	16	9	7	8	18	14	21	11	15	22	19	12	20	23	24	17	28	27	29	25	26	226
227	2	3	4	0	7	5	1	10	13	16	9	6	8	18	15	21	11	14	23	19	12	20	22	25	17	29	27	28	24	26	227
228	1	3	4	0	7	6	2	10	13	15	9	5	8	18	16	21	12	14	23	19	11	20	22	25	17	29	27	28	24	26	228
229	1	3	4	0	6	7	2	10	13	14	9	5	8	19	16	21	12	15	22	18	11	20	23	25	17	28	27	29	24	26	229
230	2	3	4	0	5	8	1	10	14	13	9	6	7	19	15	21	12	16	22	18	11	20	23	25	17	28	27	29	24	26	230
231	2	3	4	0	5	8	1	10	14	13	9	6	7	19	15	21	12	16	22	18	11	20	23	25	17	28	26	29	24	27	231
232	1	3	4	0	6	7	2	10	13	14	9	5	8	19	16	21	12	15	22	18	11	20	23	25	17	28	26	29	24	27	232
233	1	3	4	0	6	7	2	10	13	14	9	5	8	18	16	21	12	15	22	19	11	20	23	25	17	28	26	29	24	27	233
234	2	3	4	0	6	7	1	10	14	13	9	5	8	18	16	21	12	15	22	19	11	20	23	25	17	28	26	29	24	27	234
235	2	3	4	1	6	7	0	10	14	12	8	5	9	19	16	21	13	15	23	18	11	20	22	25	17	28	27	29	24	26	235
236	1	3	4	2	5	8	0	9	13	11	7	6	10	19	15	22	14	16	23	17	12	20	21	26	18	27	28	29	24	25	236
237	0	3	4	2	5	8	1	9	13	11	7	6	10	19	15	22	14	16	23	17	12	20	21	26	18	27	28	29	24	25	237
238	0	3	4	1	6	7	2	10	14	12	8	5	9	19	16	21	13	15	23	18	11	20	22	25	17	28	27	29	24	26	238
239	0	3	4	1	6	7	2	10	14	13	9	5	8	18	16	21	12	15	23	19	11	20	22	25	17	28	27	29	24	26	239
240	0	3	4	2	5	8	1	9	13	14	10	6	7	17	15	22	11	16	23	20	12	19	21	26	18	27	28	29	24	25	240
241	0	3	5	2	4	8	1	9	13	14	10	6	7	17	15	22	11	16	23	20	12	19	21	26	18	27	28	29	24	25	241
242	0	3	5	1	4	7	2	10	13	14	9	6	8	17	16	22	12	15	23	19	11	20	21	25	18	28	27	29	24	26	242
243	1	3	4	0	5	6	2	10	12	15	8	7	9	17	16	23	13	14	22	19	11	21	20	24	18	29	26	28	25	27	243
244	2	3	4	0	5	6	1	10	12	15	8	7	9	18	16	23	13	14	22	19	11	21	20	24	17	29	26	28	25	27	244
245	2	3	5	1	4	7	0	10	13	14	9	6	8	18	16	22	12	15	23	19	11	20	21	25	17	28	27	29	24	26	245
246	1	3	6	2	4	7	0	10	14	13	9	5	8	17	15	21	12	16	23	19	11	20	22	25	18	28	27	29	24	26	246
247	0	3	7	2	4	6	1	10	14	13	9	5	8	17	15	21	12	16	23	19	11	20	22	24	18	29	27	28	25	26	247
248	0	3	7	1	4	5	2	9	13	14	10	6	8	18	16	22	12	15	23	19	11	20	21	24	17	29	27	28	25	26	248
249	0	3	6	1	4	5	2	9	13	14	10	7	8	18	16	22	12	15	23	19	11	20	21	24	17	28	27	29	25	26	249
250	0	3	5	2	4	6	1	10	14	13	9	7	8	17	15	21	12	16	23	19	11	20	22	24	18	28	27	29	25	26	250
251	0	3	4	2	5	6	1	10	14	12	8	7	9	17	15	21	13	16	23	18	11	20	22	24	19	29	26	28	25	27	251
252	0	3	4	1	6	5	2	10	13	12	8	7	9	18	16	22	14	15	24	17	11	20	21	23	19	29	26	28	25	27	252
253	1	3	4	0	6	5	2	10	12	13	9	7	8	18	16	22	14	15	24	17	11	20	21	23	19	29	27	28	25	26	253
254	2	3	4	0	5	6	1	9	12	14	10	8	7	17	15	21	13	16	23	18	11	20	22	24	19	29	27	28	25	26	254
255	2	3	5	1	4	6	0	9	13	14	10	8	7	17	15	21	12	16	23	18	11	20	22	24	19	29	26	28	25	27	255
256	1	3	5	2	4	6	0	10	14	13	9	7	8	18	15	22	12	16	23	17	11	20	21	24	19	29	26	28	25	27	256
257	0	3	5	2	4	6	1	10	14	12	9	7	8	18	15	22	13	16	23	17	11	20	21	24	19	28	26	29	25	27	257
258	0	3	6	1	4	5	2	9	13	12	10	8	7	18	15	21	14	16	24	17	11	20	22	23	19	28	26	29	25	27	258
259	1	3	6	0	4	5	2	9	13	12	10	8	7	19	14	21	15	17	24	16	11	20	23	22	18	29	27	28	25	26	259
260	1	3	5	0	4	6	2	10	14	12	9	7	8	19	13	22	15	17	24	16	11	20	23	21	18	29	27	28	25	26	260
261	0	3	5	1	4	6	2	10	15	12	9	7	8	19	13	22	14	17	24	16	11	20	23	21	18	28	26	29	25	27	261
262	0	3	6	2	4	5	1	9	15	11	10	8	7	20	14	21	13	18	23	16	12	19	24	22	17	27	25	29	26	28	262
263	0	3	6	2	5	4	1	9	14	11	10	8	7	20	15	21	13	18	23	16	12	19	24	22	17	27	25	28	26	29	263
264	0	3	5	1	6	4	2	10	13	12	9	7	8	19	15	22	14	17	24	16	11	20	23	21	18	28	26	27	25	29	264
265	1	3	4	0	6	5	2	11	12	13	8	7	9	18	14	23	15	16	25	17	10	20	22	21	19	29	27	26	24	28	265
266	1	3	4	0	5	6	2	11	12	13	8	7	9	18	14	23	15	16	25	17	10	20	21	22	19	29	27	26	24	28	266
267	0	3	5	1	4	6	2	10	13	12	9	7	8	19	15	22	14	17	24	16	11	20	21	23	18	29	26	27	25	28	267
268	0	3	5	2	4	6	1	10	13	12	9	8	7	19	15	22	14	17	24	16	11	20	21	23	18	29	26	27	25	28	268
269	0	3	5	2	4	6	1	10	13	12	9	8	7	19	14	23	15	17	25	16	11	20	21	22	18	29	26	27	24	28	269
270	0	3	6	1	4	5	2	10	14	12	9	7	8	19	13	23	15	17	25	16	11	20	22	21	18	29	26	27	24	28	270
271	0	3	6	1	5	4	2	10	14	12	9	7	8	19	13	23	15	17	24	16	11	20	22	21	18	29	27	26	25	28	271
272	0	3	5	2	6	4	1	10	13	12	9	8	7	19	14	23	15	17	24	16	11	20	21	22	18	29	27	26	25	28	272
273	0	3	5	2	6	4	1	10	13	12	9	8	7	19	14	23	15	16	24	17	11	20	21	22	18	29	27	26	25	28	273
274	0	3	6	1	5	4	2	9	14	12	10	7	8	19	13	23	15	16	24	17	11	20	22	21	18	29	28	26	25	27	274
275	1	2	7	0	4	5	3	9	15	13	11	6	8	18	12	22	14	17	25	16	10	20	23	21	19	29	28	27	24	26	275
276	1	2	7	0	4	5	3	9	15	14	11	6	8	18	12	21	13	17	25	16	10	20	23	22	19	29	28	27	24	26	276
277	0	3	6	1	5	4	2	9	14	15	10	7	8	19	12	21	13	16	25	17	11	20	22	23	18	29	28	26	24	27	277
278	0	3	5	1	6	4	2	10	14	15	9	8	7	19	12	22	13	16	25	17	11	20	21	23	18	29	27	26	24	28	278
279	0	3	5	1	6	4	2	10	15	14	9	8	7	18	12	23	13	16	24	17	11	20	21	22	19	29	27	26	25	28	279
280	0	3	5	1	6	4	2	10	15	14	9	8	7	18	12	23	13	16	24	17	11	20	22	21	19	29	27	26	25	28	280
281	0	3	5	1	6	4	2	10	14	15	9	8	7	19	12	22	13	16	24	17	11	20	23	21	18	29	27	26	25	28	281
282	0	3	6	2	5	4	1	9	13	15	10	7	8	19	12	21	14	16	24	17	11	20	23	22	18	29	27	26	25	28	282
283	1	3	6	2	4	5	0	9	12	14	11	7	8	18	13	21	15	17	25	16	10	20	22	23	19	29	26	27	24	28	283
284	1	3	6	2	4	5	0	9	12	14	11	8	7	18	13	21	15	17	25	16	10	20	22	23	19	29	26	27	24	28	284
285	0	3	6	2	5	4	1	9	13	15	10	8	7	19	12	21	14	16	24	17	11	20	22	23	18	29	27	26	25	28	285
286	0	3	6	2	5	4	1	10	14	15	9	8	7	19	12	22	13	16	24	17	11	20	21	23	18	29	27	26	25	28	286
287	1	3	6	2	4	5	0	11	15	14	8	9	7	18	13	23	12	17	25	16	10	20	21	22	19	29	26	27	24	28	287
288	2	3	5	1	4	6	0	11	15	13	8	9	7	18	14	23	12	17	25	16	10	20	22	21	19	29	26	27	24	28	288
289	2	3	5	1	4	6	0	10	15	12	9	8	7	18	14	23	13	16	24	17	11	20	22	21	19	28	26	27	25	29	289
290	1	3	6	2	4	5	0	10	15	12	9	8	7	18	13	23	14	16	24	17	11	20	21	22	19	28	26	27	25	29	290
291	0	3	6	2	5	4	1	10	15	13	9	8	7	18	12	23	14	17	25	16	11	20	21	22	19	29	26	27	24	28	291
292	0	3	5	1	6	4	2	10	15	14	9	8	7	18	12	23	13	17	25	16	11	20	22	21	19	29	26	27	24	28	292
293	0	3	5	1	6	4	2	10	15	14	9	8	7	18	13	23	12	17	24	16	11	20	22	21	19	28	26	27	25	29	293
294	0	3	5	2	6	4	1	10	15	14	9	8	7	18	13	23	12	17	24	16	11	20	21	22	19	28	26	27	25	29	294
295	0	3	5	2	6	4	1	10	15	14	9	8	7	18	12	22	13	17	25	16	11	20	21	23	19	28	26	27	24	29	295
296	0	3	5	2	6	4	1	9	15	13	10	8	7	18	12	21	14	17	25	16	11	20	22	23	19	27	26	28	24	29	296
297	0	3	5	2	6	4	1	9	15	12	10	8	7	18	13	21	14	17	25	16	11	20	22	23	19	27	26	28	24	29	297
298	0	3	6	2	5	4	1	10	15	12	9	8	7	18	14	22	13	17	25	16	11	20	21	23	19	28	26	27	24	29	298
299	0	3	6	2	5	4	1	10	15	13	9	8	7	18	14	23	12	17	25	16	11	20	21	22	19	28	27	26	24	29	299
300	0	3	5	1	6	4	2	9	16	14	10	7	8	18	13	23	11	17	25	15	12	19	22	21	20	28	27	26	24	29	300
301	0	3	5	1	6	4	2	9	16	14	10	7	8	18	13	22	11	17	25	15	12	19	23	21	20	29	27	26	24	28	301
302	0	3	6	2	5	4	1	9	15	13	10	8	7	18	14	22	12	17	25	16	11	19	23	21	20	29	27	26	24	28	302
303	0	3	6	2	5	4	1	9	15	13	10	8	7	18	14	22	12	17	24	16	11	19	23	21	20	28	27	26	25	29	303
304	0	3	6	2	5	4	1	9	15	13	10	8	7	18	14	22	11	17	24	16	12	20	23	21	19	28	27	26	25	29	304
305	0	3	6	2	5	4	1	9	15	13	10	8	7	18	14	22	11	17	25	16	12	20	23	21	19	29	26	27	24	28	305
306	0	3	6	2	5	4	1	10	16	13	9	8	7	17	14	21	12	18	25	15	11	20	23	22	19	29	26	27	24	28	306
307	0	3	7	2	5	4	1	10	16	12	9	8	6	17	14	21	13	18	25	15	11	20	23	22	19	28	27	26	24	29	307
308	0	3	7	1	5	4	2	9	15	12	10	8	6	18	14	22	13	17	25	16	11	20	23	21	19	28	27	26	24	29	308
309	0	3	6	1	5	4	2	9	15	13	10	8	7	18	14	23	12	17	25	16	11	20	22	21	19	29	27	26	24	28	309
310	0	3	6	1	5	4	2	10	15	13	9	7	8	17	14	23	12	18	25	16	11	20	22	21	19	29	27	26	24	28	310
311	0	3	6	1	5	4	2	10	15	13	9	7	8	17	14	23	12	18	25	16	11	20	22	21	19	29	27	26	24	28	311
312	0	3	5	2	6	4	1	9	15	13	10	8	7	18	14	23	11	17	26	16	12	20	21	22	19	29	28	25	24	27	312
313	0	3	4	2	6	5	1	9	14	13	10	8	7	18	15	23	11	17	26	16	12	20	21	22	19	29	28	25	24	27	313
314	0	3	4	1	5	6	2	10	14	13	9	7	8	17	16	23	12	18	25	15	11	19	22	21	20	29	27	26	24	28	314
315	0	3	5	1	4	6	2	10	14	13	9	7	8	17	16	23	12	18	25	15	11	19	22	21	20	29	27	26	24	28	315
316	0	3	6	2	4	5	1	9	14	13	10	8	7	17	15	23	11	18	26	16	12	20	21	22	19	29	27	25	24	28	316
317	0	3	6	2	5	4	1	9	14	13	10	8	7	17	15	23	11	18	26	16	12	20	21	22	19	29	27	25	24	28	317
318	0	3	5	1	6	4	2	9	13	14	10	7	8	18	15	23	12	17	25	16	11	19	21	22	20	29	27	26	24	28	318
319	0	3	5	1	6	4	2	9	13	14	10	7	8	18	15	22	12	16	24	17	11	19	21	23	20	29	26	27	25	28	319
320	0	3	6	2	5	4	1	9	14	13	10	8	7	18	15	22	11	16	24	17	12	20	21	23	19	29	26	27	25	28	320
321	0	3	6	2	5	4	1	9	14	12	10	8	7	18	15	23	11	17	25	16	13	20	21	22	19	29	27	26	24	28	321
322	0	3	5	2	6	4	1	9	14	11	10	7	8	18	15	23	12	17	25	16	13	20	21	22	19	29	27	26	24	28	322
323	0	3	5	2	7	4	1	9	14	11	10	6	8	18	15	23	12	16	25	17	13	20	21	22	19	29	26	27	24	28	323
324	0	3	5	1	7	4	2	10	14	12	9	6	8	18	15	23	11	16	25	17	13	20	22	21	19	29	26	27	24	28	324
325	0	3	5	1	6	4	2	10	15	13	9	7	8	18	14	23	11	17	25	16	12	20	22	21	19	28	27	26	24	29	325
326	0	3	6	2	5	4	1	9	15	13	10	7	8	18	14	23	11	17	25	16	12	19	21	22	20	28	27	26	24	29	326
327	0	3	6	2	5	4	1	9	14	12	10	7	8	18	15	23	11	17	25	16	13	19	21	22	20	29	26	27	24	28	327
328	0	4	5	1	6	3	2	10	13	11	9	8	7	17	15	24	12	18	26	16	14	20	22	21	19	29	25	27	23	28	328
329	0	4	5	1	6	3	2	10	13	11	9	8	7	17	15	24	12	18	26	16	14	20	22	21	19	29	25	27	23	28	329
330	0	3	5	2	6	4	1	9	14	12	10	7	8	17	15	23	11	18	25	16	13	20	21	22	19	29	26	27	24	28	330
331	0	3	5	2	6	4	1	9	14	12	10	7	8	16	15	23	11	18	25	17	13	20	21	22	19	29	26	27	24	28	331
332	0	3	6	2	5	4	1	9	14	12	10	7	8	16	15	23	11	17	25	18	13	19	21	22	20	29	26	28	24	27	332
333	0	3	6	2	4	5	1	9	15	12	10	7	8	17	14	23	11	16	25	18	13	19	20	22	21	29	26	28	24	27	333
334	0	3	5	1	4	6	2	10	15	11	9	8	7	18	13	24	12	16	26	17	14	19	20	21	22	29	25	27	23	28	334
335	0	3	4	1	5	6	2	10	15	11	9	8	7	18	13	24	12	17	26	16	14	19	20	21	22	29	25	27	23	28	335
336	0	3	4	2	6	5	1	9	15	12	10	7	8	17	14	23	11	18	25	16	13	19	20	22	21	29	26	27	24	28	336
337	0	3	4	2	6	5	1	9	14	12	10	7	8	17	15	23	11	18	25	16	13	19	20	22	21	29	26	27	24	28	337
338	0	3	4	1	5	6	2	9	14	11	10	7	8	18	15	23	12	17	25	16	13	19	20	22	21	29	26	28	24	27	338
339	0	3	5	1	4	6	2	9	14	11	10	7	8	18	15	22	12	16	24	17	13	19	20	23	21	29	26	28	25	27	339
340	0	3	6	2	4	5	1	9	14	12	10	7	8	18	15	22	11	16	24	17	13	20	19	23	21	29	26	27	25	28	340
341	1	3	7	2	5	4	0	8	15	13	11	6	9	18	14	23	10	17	25	16	12	20	19	22	21	29	27	26	24	28	341
342	1	3	7	2	5	4	0	8	15	13	11	6	9	18	14	23	10	17	25	16	12	20	19	22	21	29	27	26	24	28	342
343	0	3	6	2	4	5	1	9	14	12	10	7	8	18	15	22	11	16	24	17	13	21	19	23	20	29	26	27	25	28	343
344	0	3	5	1	4	6	2	9	13	12	10	7	8	18	15	22	11	16	24	17	14	21	19	23	20	29	25	28	26	27	344
345	0	3	4	1	5	6	2	9	13	12	10	7	8	19	15	23	11	17	24	16	14	20	18	22	21	29	25	28	26	27	345
346	0	3	4	1	6	5	2	9	14	12	10	7	8	19	15	23	11	17	24	16	13	20	18	22	21	29	26	27	25	28	346
347	1	3	4	0	6	5	2	9	14	13	11	7	8	18	15	23	10	17	24	16	12	20	19	22	21	28	26	27	25	29	347
348	2	3	4	0	5	6	1	9	14	13	11	7	8	18	15	24	10	17	23	16	12	20	19	22	21	27	25	28	26	29	348
349	2	3	4	1	5	6	0	9	14	12	10	7	8	18	15	24	11	16	23	17	13	20	19	22	21	27	25	29	26	28	349
350	2	3	4	1	6	5	0	9	14	12	10	7	8	18	15	24	11	16	23	17	13	19	20	22	21	27	26	29	25	28	350
351	2	3	4	1	6	5	0	9	14	12	11	7	8	18	15	24	10	17	23	16	13	19	20	22	21	26	27	28	25	29	351
352	2	3	4	1	6	5	0	9	14	12	11	7	8	18	15	24	10	17	23	16	13	19	20	22	21	25	27	28	26	29	352
353	2	3	4	1	7	5	0	9	14	13	10	6	8	18	15	24	11	17	23	16	12	19	21	22	20	25	26	29	27	28	353
354	2	3	4	1	7	5	0	9	14	13	10	6	8	17	15	24	11	18	23	16	12	19	21	22	20	26	25	29	27	28	354
355	2	3	4	0	6	5	1	9	14	12	11	7	8	17	15	24	10	18	23	16	13	19	20	22	21	27	25	28	26	29	355
356	2	3	4	0	6	5	1	9	14	12	11	7	8	17	15	24	10	18	23	16	13	19	20	22	21	27	26	28	25	29	356
357	2	3	4	0	7	5	1	9	14	13	11	6	8	17	15	24	10	18	23	16	12	19	20	22	21	27	26	28	25	29	357
358	2	3	4	0	7	5	1	9	13	14	11	6	8	18	16	24	10	17	23	15	12	19	20	22	21	27	26	28	25	29	358
359	2	3	5	1	6	4	0	9	12	14	11	7	8	18	16	24	10	17	22	15	13	19	21	23	20	26	27	28	25	29	359
360	2	3	5	1	6	4	0	9	12	13	11	7	8	17	15	24	10	18	22	16	14	19	21	23	20	26	27	28	25	29	360
361	2	3	4	0	7	5	1	9	13	12	11	6	8	16	15	24	10	18	23	17	14	19	20	22	21	27	26	28	25	29	361
362	1	4	3	0	8	6	2	10	14	11	12	5	7	15	16	23	9	18	24	17	13	19	20	21	22	28	25	27	26	29	362
363	1	4	3	0	8	6	2	10	14	11	12	5	7	15	16	23	9	18	24	17	13	19	20	21	22	28	25	27	26	29	363
364	2	3	4	0	7	5	1	9	13	11	12	6	8	16	15	24	10	18	23	17	14	19	20	22	21	28	26	27	25	29	364
365	2	3	4	0	6	5	1	9	13	11	12	7	8	17	15	24	10	18	23	16	14	19	20	22	21	28	26	27	25	29	365
366	2	3	4	0	5	6	1	9	13	11	12	7	8	17	15	23	10	18	24	16	14	19	20	21	22	27	26	28	25	29	366
367	2	3	5	1	4	7	0	9	12	10	13	6	8	16	14	22	11	18	24	17	15	19	21	20	23	26	27	28	25	29	367
368	2	3	5	1	4	7	0	9	12	10	13	6	8	16	14	22	11	18	24	17	15	19	21	20	23	26	27	28	25	29	368
369	2	3	4	0	5	6	1	9	13	10	12	7	8	17	15	23	11	18	24	16	14	19	20	21	22	27	26	28	25	29	369
370	2	3	4	0	6	5	1	9	14	10	11	8	7	17	15	24	12	18	23	16	13	20	19	22	21	28	25	27	26	29	370
371	2	3	4	0	6	5	1	9	14	10	11	8	7	17	15	24	12	18	23	16	13	20	19	22	21	28	25	27	26	29	371
372	2	3	4	0	5	6	1	9	13	10	12	7	8	17	15	24	11	18	23	16	14	19	20	22	21	28	26	27	25	29	372
373	2	3	4	0	5	6	1	9	13	10	12	7	8	17	15	24	11	18	23	16	14	19	20	22	21	28	26	27	25	29	373
374	2	3	4	0	5	6	1	9	14	10	12	8	7	17	15	24	11	18	23	16	13	20	19	22	21	28	26	27	25	29	374
375	2	3	5	0	4	7	1	9	14	10	12	8	6	17	15	24	11	18	23	16	13	20	19	22	21	28	26	27	25	29	375
376	2	3	5	0	4	7	1	9	13	10	11	8	6	17	15	24	12	18	23	16	14	20	19	22	21	27	26	28	25	29	376
377	2	3	4	1	5	6	0	9	13	11	10	8	7	16	14	25	12	18	22	17	15	21	19	23	20	26	27	28	24	29	377
378	2	3	4	1	5	6	0	9	13	11	10	8	7	16	14	25	12	18	22	17	15	21	19	23	20	26	27	28	24	29	378
379	2	3	5	1	4	7	0	9	13	10	11	8	6	17	15	24	12	18	23	16	14	20	19	22	21	27	26	28	25	29	379
380	2	3	5	1	4	7	0	9	13	10	12	8	6	17	15	24	11	18	23	16	14	20	19	21	22	28	26	27	25	29	380
381	2	3	4	0	5	6	1	9	12	11	13	8	7	17	14	25	10	18	22	16	15	20	19	21	23	28	27	26	24	29	381
382	2	3	4	0	5	6	1	9	12	11	13	7	8	17	14	25	10	18	22	16	15	19	20	21	23	28	27	26	24	29	382
383	2	3	5	1	4	7	0	9	13	10	12	6	8	16	15	24	11	18	23	17	14	19	20	21	22	28	26	27	25	29	383
384	2	3	6	1	4	8	0	10	13	9	12	5	7	16	15	24	11	18	23	17	14	19	20	22	21	27	25	28	26	29	384
385	2	3	7	0	5	8	1	11	12	9	13	4	6	17	14	25	10	18	23	16	15	19	20	22	21	27	24	28	26	29	385
386	2	3	8	0	6	7	1	11	12	10	13	4	5	17	14	26	9	18	23	16	15	20	19	21	22	28	24	27	25	29	386
387	2	3	8	1	6	7	0	10	13	11	12	4	5	16	15	26	9	18	23	17	14	21	19	20	22	28	25	27	24	29	387
388	2	3	7	1	5	8	0	9	13	11	12	4	6	15	16	25	10	18	23	17	14	22	20	19	21	28	26	27	24	29	388
389	2	3	6	1	5	8	0	9	13	10	12	4	7	15	17	25	11	18	23	16	14	22	20	19	21	28	26	27	24	29	389
390	2	3	6	1	5	8	0	10	14	9	12	4	7	15	17	25	11	18	23	16	13	21	19	20	22	27	26	28	24	29	390
391	2	3	7	1	4	8	0	10	14	9	12	5	6	15	17	25	11	18	22	16	13	20	19	21	23	27	26	28	24	29	391
392	2	3	7	1	4	8	0	9	13	10	11	5	6	15	17	25	12	18	22	16	14	20	19	21	23	28	26	27	24	29	392
393	2	3	6	1	4	8	0	9	13	10	11	5	7	14	16	25	12	18	23	17	15	21	19	20	22	28	27	26	24	29	393
394	2	3	6	1	4	8	0	9	13	10	12	5	7	14	16	25	11	18	23	17	15	21	19	20	22	28	27	26	24	29	394
395	2	3	7	0	5	9	1	8	13	11	12	4	6	15	17	25	10	18	22	16	14	20	19	21	23	28	26	27	24	29	395
396	2	3	7	0	5	9	1	8	14	11	12	4	6	16	17	26	10	18	22	15	13	20	19	21	23	27	25	28	24	29	396
397	2	3	7	1	4	8	0	9	14	10	12	5	6	16	17	26	11	18	23	15	13	20	19	21	22	27	25	28	24	29	397
398	1	3	7	2	4	8	0	10	13	9	12	6	5	15	18	25	11	17	24	16	14	20	19	22	21	28	26	27	23	29	398
399	1	3	7	2	4	8	0	10	13	9	12	6	5	15	18	25	11	17	24	16	14	20	19	22	21	28	26	27	23	29	399
400	2	3	7	1	4	8	0	9	14	10	12	5	6	15	17	25	11	18	23	16	13	20	19	21	22	27	26	28	24	29	400
401	2	3	7	1	4	8	0	9	14	11	12	5	6	15	17	25	10	18	22	16	13	20	19	21	23	27	26	28	24	29	401
402	1	3	8	2	4	7	0	10	13	11	12	6	5	16	18	26	9	17	21	15	14	19	20	22	23	28	25	27	24	29	402
403	1	3	8	2	5	7	0	10	13	11	12	6	4	16	18	26	9	17	21	15	14	19	20	22	23	28	25	27	24	29	403
404	2	3	7	1	5	8	0	9	13	11	12	6	4	15	18	25	10	17	22	16	14	20	19	21	23	27	26	28	24	29	404
405	2	3	7	1	4	8	0	9	13	10	12	6	5	15	18	25	11	17	23	16	14	21	19	20	22	27	26	28	24	29	405
406	1	3	7	2	4	8	0	9	13	10	12	6	5	15	17	25	11	18	23	16	14	21	19	20	22	28	26	27	24	29	406
407	1	3	7	2	4	8	0	9	13	10	12	6	5	14	17	25	11	18	22	16	15	21	19	20	23	28	26	27	24	29	407
408	2	3	7	1	4	8	0	9	13	10	12	6	5	14	17	25	11	18	22	16	15	21	19	20	23	28	26	27	24	29	408
409	2	3	7	1	5	8	0	9	13	10	12	6	4	15	17	24	11	18	23	16	14	20	19	21	22	29	26	27	25	28	409
410	2	3	7	1	6	8	0	9	13	10	12	5	4	15	17	24	11	18	23	16	14	20	19	22	21	29	26	27	25	28	410
411	2	3	7	1	6	8	0	9	13	10	12	5	4	15	16	24	11	18	23	17	14	20	19	22	21	28	27	26	25	29	411
412	2	3	7	1	5	8	0	9	13	10	12	6	4	16	15	24	11	18	23	17	14	20	19	21	22	28	27	26	25	29	412
413	2	3	7	0	5	8	1	9	13	11	12	6	4	16	15	24	10	18	23	17	14	20	19	21	22	29	26	27	25	28	413
414	2	3	7	0	5	8	1	10	14	12	11	6	4	16	15	23	9	18	24	17	13	20	19	22	21	29	25	27	26	28	414
415	2	3	6	1	4	8	0	11	15	12	10	7	5	17	14	22	9	19	24	16	13	21	18	23	20	28	25	26	27	29	415
416	2	3	6	1	4	8	0	12	15	11	10	7	5	17	13	22	9	19	24	16	14	21	18	23	20	28	25	26	27	29	416
417	2	3	7	0	5	8	1	12	14	10	11	6	4	16	13	23	9	18	24	17	15	20	19	22	21	28	25	27	26	29	417
418	2	3	7	0	5	8	1	11	13	10	12	6	4	16	14	23	9	18	24	17	15	20	19	22	21	28	26	27	25	29	418
419	2	3	6	1	4	9	0	10	12	11	13	7	5	17	15	22	8	19	25	16	14	21	18	23	20	28	27	26	24	29	419
420	2	3	6	1	4	9	0	10	12	11	13	7	5	17	15	22	8	19	26	16	14	21	18	23	20	27	28	25	24	29	420
421	2	3	7	0	5	8	1	10	13	11	12	6	4	17	14	23	9	18	26	16	15	20	19	22	21	27	28	25	24	29	421
422	2	3	7	0	5	8	1	9	14	11	12	6	4	17	13	23	10	18	25	16	15	20	19	21	22	28	27	26	24	29	422
423	2	3	7	0	5	8	1	9	14	11	12	6	4	17	13	23	10	18	25	16	15	20	19	21	22	28	27	26	24	29	423
424	2	3	7	0	5	8	1	9	14	11	12	6	4	17	13	23	10	18	25	16	15	20	19	22	21	28	27	26	24	29	424
425	2	3	7	1	4	8	0	9	14	11	12	6	5	17	13	23	10	18	25	16	15	20	19	22	21	28	27	26	24	29	425
426	2	4	8	1	3	7	0	10	13	11	12	6	5	17	14	24	9	18	25	15	16	20	19	21	22	27	28	26	23	29	426
427	2	4	8	0	3	7	1	10	12	11	13	6	5	16	14	24	9	18	25	15	17	20	19	21	22	26	28	27	23	29	427
428	2	3	7	0	4	8	1	9	12	11	13	6	5	16	14	24	10	18	25	15	17	20	19	21	22	26	27	28	23	29	428
429	2	3	7	0	5	8	1	9	13	11	12	6	4	16	14	24	10	18	25	15	17	20	19	21	22	27	26	28	23	29	429
430	2	3	7	0	5	8	1	9	14	11	12	6	4	15	13	23	10	18	25	16	17	20	19	21	22	27	26	28	24	29	430
431	2	3	7	0	4	8	1	9	14	10	13	6	5	15	12	23	11	18	25	16	17	20	19	21	22	26	27	28	24	29	431
432	2	3	8	0	4	7	1	9	14	10	13	6	5	16	12	23	11	18	25	15	17	20	19	21	22	26	28	27	24	29	432
433	2	3	8	0	4	7	1	9	14	10	12	6	5	16	13	23	11	18	24	15	17	20	19	21	22	27	28	26	25	29	433
434	2	3	8	0	4	7	1	9	13	10	12	6	5	15	14	23	11	18	24	16	17	20	19	21	22	27	28	26	25	29	434
435	2	3	8	1	5	7	0	9	12	11	13	6	4	15	14	22	10	18	25	16	17	21	19	20	23	26	29	27	24	28	435
436	2	3	8	1	5	7	0	9	12	11	13	6	4	15	14	22	10	17	25	16	18	21	19	20	23	26	29	27	24	28	436
437	2	3	8	0	4	7	1	9	13	10	12	6	5	14	15	23	11	16	24	17	18	20	19	21	22	27	28	26	25	29	437
438	2	3	7	0	4	8	1	9	14	10	12	5	6	13	15	24	11	16	23	17	18	20	19	21	22	28	27	26	25	29	438
439	2	3	7	0	4	8	1	9	15	10	12	5	6	13	14	25	11	16	23	17	18	20	19	21	22	28	27	26	24	29	439
440	2	3	8	0	4	7	1	9	15	10	12	6	5	14	13	25	11	16	23	17	18	20	19	21	22	27	28	26	24	29	440
441	2	3	8	1	5	7	0	9	14	10	13	6	4	15	12	25	11	17	22	16	19	20	18	21	23	26	28	27	24	29	441
442	2	3	8	1	6	7	0	9	14	10	13	5	4	15	12	25	11	17	22	16	19	20	18	21	23	26	27	28	24	29	442
443	2	3	8	0	6	7	1	9	15	10	13	5	4	14	12	25	11	17	23	16	18	20	19	21	22	27	26	28	24	29	443
444	2	3	8	0	5	7	1	9	15	10	13	6	4	14	11	25	12	17	23	16	18	20	19	21	22	27	26	28	24	29	444
445	2	3	8	1	4	7	0	9	14	10	12	6	5	15	11	25	13	17	22	16	19	20	18	21	23	26	27	28	24	29	445
446	2	3	8	1	4	7	0	9	14	10	12	6	5	15	11	25	13	17	22	16	19	20	18	21	24	26	27	28	23	29	446
447	2	3	8	0	5	6	1	9	15	11	13	7	4	14	10	25	12	17	23	16	19	20	18	21	24	27	26	29	22	28	447
448	2	3	8	0	5	6	1	9	15	11	13	7	4	14	10	25	12	17	23	16	19	20	18	21	24	27	26	29	22	28	448
449	2	3	9	1	4	7	0	8	14	10	12	6	5	15	11	24	13	16	22	17	18	21	19	20	25	26	27	29	23	28	449
450	2	3	9	1	4	7	0	8	13	10	12	6	5	15	11	24	14	16	22	17	18	21	19	20	25	26	27	29	23	28	450
451	2	3	8	0	5	6	1	9	12	11	13	7	4	15	10	24	14	17	23	16	19	21	18	20	25	27	26	28	22	29	451
452	2	3	7	0	5	6	1	9	12	11	13	8	4	15	10	24	14	17	23	16	19	21	18	20	25	27	26	28	22	29	452
453	2	3	6	1	4	7	0	9	13	10	12	8	5	14	11	25	15	16	22	17	18	20	19	21	24	26	27	29	23	28	453
454	2	3	6	1	4	7	0	9	13	10	12	8	5	14	11	25	15	16	22	17	18	20	19	21	24	26	27	29	23	28	454
455	2	3	7	0	4	6	1	9	13	11	12	8	5	15	10	25	14	16	23	17	18	21	19	20	24	27	26	29	22	28	455
456	2	3	8	0	4	6	1	9	14	11	12	7	5	15	10	25	13	16	23	17	18	21	19	20	24	27	26	29	22	28	456
457	2	3	8	1	5	7	0	9	14	11	13	6	4	15	10	25	12	16	22	17	19	21	18	20	24	26	27	29	23	28	457
458	2	3	7	1	5	8	0	9	13	11	14	6	4	15	10	25	12	16	22	17	19	21	18	20	24	26	27	29	23	28	458
459	2	3	6	0	5	8	1	9	13	11	14	7	4	15	10	25	12	17	23	16	19	21	18	20	24	27	26	29	22	28	459
460	2	3	6	0	5	7	1	9	13	12	14	8	4	15	10	25	11	17	23	16	19	22	18	20	24	28	26	29	21	27	460
461	2	3	7	1	4	6	0	9	12	13	14	8	5	15	10	24	11	16	23	17	19	22	18	20	25	29	27	28	21	26	461
462	2	3	7	1	4	6	0	9	12	13	14	8	5	15	10	24	11	16	23	17	19	21	18	20	25	29	27	28	22	26	462
463	2	3	6	0	5	7	1	9	13	12	14	8	4	15	10	25	11	16	23	17	18	21	19	20	24	28	27	29	22	26	463
464	2	3	6	0	5	8	1	9	14	11	13	7	4	16	10	25	12	15	24	17	18	21	19	20	23	28	27	29	22	26	464
465	2	3	6	0	4	8	1	9	14	11	13	7	5	16	10	25	12	15	24	17	19	21	18	20	23	29	27	28	22	26	465
466	2	3	6	0	4	8	1	9	14	12	13	7	5	15	10	25	11	16	23	17	19	21	18	20	24	29	27	28	22	26	466
467	2	3	6	0	5	8	1	9	14	12	13	7	4	15	10	25	11	16	23	17	19	20	18	21	24	28	27	29	22	26	467
468	2	3	6	0	5	7	1	9	14	12	13	8	4	15	10	25	11	16	23	17	19	20	18	21	24	28	27	29	22	26	468
469	2	3	7	1	4	6	0	9	14	13	12	8	5	15	10	24	11	16	23	17	19	20	18	21	25	28	26	29	22	27	469
470	2	4	7	1	3	5	0	9	13	14	11	8	6	15	10	23	12	16	24	17	20	19	18	22	25	28	26	29	21	27	470
471	2	4	7	1	3	5	0	9	12	14	11	8	6	15	10	23	13	16	25	17	20	19	18	22	24	28	26	29	21	27	471
472	2	3	8	1	4	6	0	9	11	14	12	7	5	15	10	24	13	16	25	17	19	20	18	21	23	28	26	29	22	27	472
473	2	3	8	0	4	6	1	9	11	14	13	7	5	15	10	25	12	17	24	16	19	20	18	21	23	28	26	29	22	27	473
474	2	3	7	0	4	6	1	9	12	14	13	8	5	15	10	25	11	17	23	16	19	20	18	21	24	27	26	29	22	28	474
475	2	3	7	0	5	6	1	9	13	14	12	8	4	15	10	24	11	16	22	17	19	20	18	21	25	27	26	29	23	28	475
476	2	3	7	0	5	6	1	9	14	13	12	8	4	15	10	24	11	16	22	17	19	20	18	21	25	27	26	29	23	28	476
477	2	3	7	1	4	6	0	8	14	12	13	9	5	15	10	25	11	17	23	16	19	20	18	21	24	27	26	29	22	28	477
478	2	3	7	1	4	6	0	8	14	11	13	9	5	16	10	25	12	17	23	15	19	20	18	21	24	28	26	29	22	27	478
479	2	3	7	1	5	6	0	9	14	11	12	8	4	16	10	24	13	17	23	15	19	20	18	21	25	28	26	29	22	27	479
480	2	3	8	1	6	5	0	9	13	11	12	7	4	16	10	23	14	17	24	15	19	20	18	21	25	28	26	29	22	27	480
481	2	3	8	1	6	5	0	9	13	11	12	7	4	17	10	23	14	16	24	15	19	20	18	21	25	28	26	29	22	27	481
482	2	3	7	1	5	6	0	9	14	12	11	8	4	18	10	24	13	16	23	15	20	19	17	21	25	28	26	29	22	27	482
483	2	3	7	1	5	6	0	9	14	12	11	8	4	18	10	24	13	16	23	15	20	19	17	21	25	28	26	29	22	27	483
484	2	3	8	1	5	6	0	9	13	11	12	7	4	18	10	23	14	16	24	15	20	19	17	22	25	28	26	29	21	27	484
485	2	3	8	0	5	6	1	9	13	11	12	7	4	19	10	23	14	16	24	15	20	18	17	22	25	28	27	29	21	26	485
486	2	3	7	0	5	6	1	9	14	12	11	8	4	19	10	23	13	15	24	16	20	17	18	21	25	28	27	29	22	26	486
487	2	3	6	0	5	7	1	9	14	12	11	8	4	18	10	22	13	15	24	16	20	17	19	21	25	28	26	29	23	27	487
488	2	3	6	0	5	8	1	9	14	11	12	7	4	18	10	22	13	16	24	15	19	17	20	21	25	28	26	29	23	27	488
489	2	3	7	0	5	8	1	9	14	10	12	6	4	18	11	23	13	16	24	15	19	17	20	21	25	28	27	29	22	26	489
490	2	3	8	0	5	7	1	9	14	10	12	6	4	18	11	23	13	16	24	15	19	17	20	22	25	28	27	29	21	26	490
491	2	3	8	1	5	7	0	9	14	10	12	6	4	18	11	23	13	17	24	15	19	16	20	22	25	28	26	29	21	27	491
492	2	3	8	1	5	7	0	9	14	10	12	6	4	18	11	23	13	17	24	15	19	16	20	21	25	28	26	29	22	27	492
493	2	3	8	0	5	6	1	9	14	10	12	7	4	18	11	23	13	17	24	15	19	16	20	21	25	28	27	29	22	26	493
494	2	3	7	0	5	6	1	9	14	10	12	8	4	18	11	23	13	17	24	15	19	16	20	21	25	28	27	29	22	26	494
495	2	3	7	1	5	6	0	9	14	10	12	8	4	18	11	22	13	17	25	15	19	16	20	21	24	28	26	29	23	27	495
496	2	3	8	1	5	6	0	9	14	10	12	7	4	18	11	22	13	17	25	15	19	16	20	21	24	28	26	29	23	27	496
497	2	3	8	0	5	6	1	9	14	10	12	7	4	18	11	23	13	17	25	15	19	16	20	21	24	28	27	29	22	26	497
498	1	3	7	0	5	6	2	9	13	10	11	8	4	18	12	23	14	17	25	15	20	16	19	21	24	28	27	29	22	26	498
499	1	3	7	0	5	6	2	9	13	11	10	8	4	18	12	22	14	17	25	15	20	16	19	21	24	28	27	29	23	26	499
500	2	3	8	0	5	6	1	9	14	11	10	7	4	18	12	21	13	17	25	15	19	16	20	22	23	28	27	29	24	26	500
501	2	3	9	1	4	7	0	8	15	10	11	6	5	19	13	21	12	16	24	14	18	17	20	23	22	29	26	28	25	27	501
502	2	3	9	1	4	7	0	8	15	10	11	6	5	19	13	22	12	16	24	14	18	17	20	23	21	29	26	28	25	27	502
503	2	3	8	0	5	6	1	9	14	11	10	7	4	18	12	23	13	17	25	15	19	16	20	22	21	28	27	29	24	26	503
504	1	3	8	0	5	6	2	9	14	11	10	7	4	18	12	24	13	17	25	15	19	16	20	22	21	28	27	29	23	26	504
505	0	3	9	1	4	7	2	8	15	10	11	6	5	19	13	24	12	16	25	14	18	17	21	23	20	29	26	28	22	27	505
506	0	3	9	1	4	7	2	8	15	10	11	6	5	19	13	24	12	16	25	14	18	17	21	23	20	29	26	28	22	27	506
507	1	3	8	0	5	6	2	9	14	11	10	7	4	18	12	24	13	17	25	15	19	16	20	22	21	28	27	29	23	26	507
508	2	3	7	0	5	6	1	9	13	11	10	8	4	18	12	24	14	17	25	16	19	15	20	21	22	28	27	29	23	26	508
509	2	3	6	0	4	7	1	9	13	10	11	8	5	19	12	24	14	17	25	16	18	15	21	20	23	28	26	29	22	27	509
510	2	3	6	0	4	7	1	9	14	10	11	8	5	19	12	24	13	17	25	15	18	16	21	20	23	28	26	29	22	27	510
511	2	3	7	0	5	6	1	9	14	10	11	8	4	18	12	24	13	17	25	15	19	16	20	21	22	28	26	29	23	27	511
512	2	3	7	0	5	6	1	9	13	10	11	8	4	18	12	24	14	17	25	15	19	16	20	22	21	28	26	29	23	27	512
513	2	3	6	1	5	7	0	8	13	11	10	9	4	18	12	24	15	16	25	14	19	17	21	22	20	29	27	28	23	26	513
514	2	3	6	1	5	7	0	8	13	11	10	9	4	17	12	24	15	16	25	14	19	18	21	22	20	29	27	28	23	26	514
515	2	3	6	0	5	7	1	9	13	11	10	8	4	17	12	24	14	16	25	15	19	18	20	22	21	28	26	29	23	27	515
516	2	3	5	0	6	8	1	9	14	11	10	7	4	18	12	24	13	16	25	15	19	17	20	22	21	28	26	29	23	27	516
517	2	3	5	0	6	8	1	9	14	11	10	7	4	18	12	24	13	16	25	15	19	17	20	22	21	29	26	28	23	27	517
518	2	3	6	0	5	8	1	9	13	12	10	7	4	17	11	24	14	16	26	15	19	18	20	22	21	29	25	28	23	27	518
519	2	3	7	1	4	9	0	8	12	13	11	6	5	16	10	25	15	17	27	14	18	19	21	23	20	28	24	29	22	26	519
520	2	3	7	1	4	9	0	8	12	13	11	6	5	16	10	25	15	17	27	14	18	19	21	23	20	28	24	29	22	26	520
521	2	3	7	0	5	8	1	9	13	12	10	6	4	16	11	24	14	17	26	15	19	18	20	22	21	28	25	29	23	27	521
522	2	3	8	0	6	7	1	9	14	12	10	5	4	16	11	24	13	17	25	15	19	18	20	22	21	28	26	29	23	27	522
523	2	3	8	0	6	7	1	9	14	12	10	5	4	16	11	24	13	17	25	15	18	19	20	22	21	28	26	29	23	27	523
524	2	3	7	0	6	8	1	9	13	12	10	5	4	16	11	24	14	17	25	15	18	19	20	22	21	28	26	29	23	27	524
525	2	3	6	0	7	8	1	9	13	12	10	5	4	17	11	24	15	16	25	14	19	18	20	22	21	28	26	29	23	27	525
526	1	3	5	0	8	7	2	9	14	12	10	6	4	17	11	24	15	16	26	13	19	18	20	21	22	28	25	29	23	27	526
527	1	3	5	0	8	7	2	9	15	12	11	6	4	17	10	24	14	16	26	13	19	18	20	21	22	28	25	29	23	27	527
528	2	3	6	0	7	8	1	9	15	12	11	5	4	18	10	24	13	16	25	14	19	17	20	22	21	27	26	29	23	28	528
529	2	3	7	0	6	8	1	9	14	12	10	5	4	18	11	24	13	16	25	15	19	17	20	22	21	27	26	29	23	28	529
530	2	3	7	0	5	8	1	9	14	12	10	6	4	17	11	24	13	16	25	15	19	18	20	22	21	28	26	29	23	27	530
531	2	3	7	0	5	8	1	9	14	12	10	6	4	17	11	24	13	16	25	15	18	19	20	22	21	28	27	29	23	26	531
532	2	3	7	0	5	8	1	9	13	12	10	6	4	18	11	24	14	16	25	15	17	19	20	21	22	28	27	29	23	26	532
533	2	3	6	0	5	9	1	8	13	12	10	7	4	19	11	24	15	16	25	14	17	18	20	21	23	28	27	29	22	26	533
534	2	3	6	0	5	9	1	8	13	12	10	7	4	19	11	24	15	16	25	14	18	17	20	21	23	28	27	29	22	26	534
535	2	3	7	1	5	8	0	9	12	13	11	6	4	18	10	24	14	16	25	15	19	17	20	21	22	28	26	29	23	27	535
536	2	3	7	1	5	8	0	9	12	13	11	6	4	18	10	24	14	16	25	15	19	17	20	22	21	28	26	29	23	27	536
537	2	3	6	0	5	8	1	9	13	12	10	7	4	18	11	24	14	16	25	15	19	17	20	23	21	29	27	28	22	26	537
538	1	3	5	0	6	7	2	9	14	12	10	8	4	17	11	24	13	16	25	15	20	18	19	23	22	29	27	28	21	26	538
539	1	3	5	0	6	7	2	9	14	13	11	8	4	16	10	25	12	17	24	15	20	18	19	22	23	29	26	28	21	27	539
540	2	3	6	0	5	8	1	9	13	14	11	7	4	16	10	25	12	17	24	15	19	18	20	21	23	29	26	28	22	27	540
541	2	3	7	0	5	8	1	9	12	14	11	6	4	16	10	24	13	17	25	15	19	18	20	21	23	28	27	29	22	26	541
542	2	3	8	0	5	7	1	9	12	13	11	6	4	16	10	24	14	17	25	15	19	18	20	22	23	28	27	29	21	26	542
543	2	3	8	1	5	7	0	9	12	13	10	6	4	16	11	24	14	17	25	15	19	18	20	22	23	29	27	28	21	26	543
544	2	3	8	1	5	7	0	9	12	13	10	6	4	16	11	24	14	17	25	15	19	18	20	21	23	29	27	28	22	26	544
545	2	3	9	0	5	6	1	8	13	12	11	7	4	17	10	25	15	16	24	14	19	18	20	21	22	28	26	29	23	27	545
546	1	3	9	0	5	6	2	8	13	12	11	7	4	17	10	26	15	16	24	14	19	18	20	21	22	28	25	29	23	27	546
547	1	3	8	0	5	7	2	9	13	12	10	6	4	16	11	26	14	17	24	15	19	18	21	20	23	28	25	29	22	27	547
548	2	3	8	0	6	7	1	9	13	12	10	5	4	16	11	25	14	17	24	15	19	18	21	20	23	28	26	29	22	27	548
549	2	3	8	0	6	7	1	9	12	13	11	5	4	16	10	24	15	17	25	14	19	18	20	21	22	29	27	28	23	26	549
550	2	3	8	0	6	7	1	9	12	13	11	5	4	16	10	24	15	17	25	14	19	18	20	21	22	29	27	28	23	26	550
551	2	3	8	0	6	7	1	9	12	13	10	5	4	16	11	25	14	17	24	15	19	18	20	21	23	28	26	29	22	27	551
552	1	3	8	0	6	7	2	10	12	14	9	5	4	16	11	26	13	18	24	15	19	17	20	22	23	27	25	29	21	28	552
553	1	3	8	0	7	6	2	11	12	14	9	5	4	16	10	26	13	18	25	15	19	17	20	22	23	27	24	29	21	28	553
554	2	3	8	0	7	6	1	11	12	13	9	5	4	16	10	25	14	17	26	15	19	18	20	21	23	28	24	29	22	27	554
555	2	3	8	0	7	6	1	10	12	13	9	5	4	16	11	24	15	17	26	14	19	18	21	20	23	28	25	29	22	27	555
556	2	3	8	0	7	6	1	9	12	13	10	5	4	16	11	24	15	17	26	14	19	18	21	20	23	28	25	29	22	27	556
557	2	3	8	0	7	6	1	9	12	13	11	5	4	16	10	24	14	17	26	15	19	18	21	20	23	28	25	29	22	27	557
558	2	3	7	0	8	5	1	10	12	14	11	6	4	16	9	24	13	18	25	15	20	17	22	19	23	28	26	29	21	27	558
559	2	3	7	0	8	5	1	11	12	14	10	6	4	16	9	24	13	18	25	15	20	17	22	19	23	28	26	29	21	27	559
560	2	3	8	0	7	6	1	11	12	13	9	5	4	16	10	24	14	17	26	15	19	18	21	20	23	28	25	29	22	27	560
561	2	3	8	0	6	7	1	10	12	13	9	5	4	16	11	24	15	17	26	14	19	18	21	20	22	28	25	29	23	27	561
562	2	3	8	0	6	7	1	9	12	13	10	5	4	16	11	24	15	17	25	14	19	18	21	20	22	28	26	29	23	27	562
563	2	3	8	0	7	6	1	9	12	13	11	5	4	16	10	24	14	17	25	15	19	18	20	21	22	28	26	29	23	27	563
564	2	3	8	0	7	6	1	10	12	13	11	5	4	16	9	24	14	17	25	15	19	18	20	21	22	28	26	29	23	27	564
565	2	3	8	0	6	7	1	10	12	13	11	5	4	16	9	24	15	17	25	14	19	18	21	20	23	28	26	29	22	27	565
566	2	3	8	0	6	7	1	9	12	13	11	5	4	16	10	24	15	17	25	14	19	18	21	20	23	28	26	29	22	27	566
567	2	3	8	1	6	7	0	9	12	13	11	5	4	16	10	25	14	17	24	15	19	18	20	21	22	28	26	29	23	27	567
568	2	3	8	1	5	7	0	9	12	13	11	6	4	16	10	26	14	18	24	15	19	17	20	21	22	28	25	29	23	27	568
569	2	3	8	1	5	7	0	9	12	13	11	6	4	16	10	26	14	18	24	15	19	17	20	21	22	28	25	29	23	27	569
570	2	3	8	1	6	7	0	10	12	13	11	5	4	16	9	25	14	17	24	15	19	18	20	21	22	28	26	29	23	27	570
571	2	3	8	0	6	7	1	10	12	13	11	5	4	16	9	24	15	17	25	14	19	18	21	20	23	28	26	29	22	27	571
572	2	3	8	0	5	7	1	9	12	13	11	6	4	16	10	24	15	17	26	14	19	18	21	20	23	28	25	29	22	27	572
573	2	3	8	0	5	7	1	9	12	13	11	6	4	16	10	24	14	17	26	15	19	18	21	20	23	28	25	29	22	27	573
574	2	3	7	0	6	8	1	10	11	14	12	5	4	16	9	23	13	18	25	15	19	17	21	20	24	27	26	29	22	28	574
575	3	2	7	0	6	8	1	10	11	14	12	5	4	16	9	23	13	18	25	15	19	17	20	21	24	27	26	29	22	28	575
576	3	1	8	0	5	7	2	9	12	13	11	6	4	16	10	24	14	17	26	15	19	18	20	21	23	28	25	29	22	27	576
577	3	1	8	0	5	7	2	9	12	13	10	6	4	16	11	24	14	17	26	15	19	18	20	21	22	28	25	29	23	27	577
578	3	2	7	0	5	8	1	10	12	13	9	6	4	16	11	24	14	17	26	15	19	18	20	21	22	28	25	29	23	27	578
579	2	3	7	1	4	8	0	10	13	12	9	6	5	16	11	25	15	17	27	14	18	19	21	20	23	28	24	29	22	26	579
580	2	3	8	1	4	7	0	9	13	12	10	6	5	16	11	25	15	17	27	14	18	19	21	20	23	28	24	29	22	26	580
581	2	3	8	1	5	7	0	9	13	12	10	6	4	16	11	24	14	17	26	15	19	18	21	20	23	28	25	29	22	27	581
582	2	3	8	1	5	7	0	9	13	12	10	6	4	16	11	24	14	17	26	15	19	18	21	20	23	28	25	29	22	27	582
583	2	3	9	0	5	7	1	8	13	12	10	6	4	16	11	24	15	17	26	14	19	18	21	20	23	28	25	29	22	27	583
584	2	3	9	0	5	7	1	8	14	11	10	6	4	16	12	24	15	17	26	13	19	18	21	20	23	28	25	29	22	27	584
585	2	3	8	1	4	6	0	9	15	11	10	7	5	16	13	25	14	17	27	12	19	18	20	21	22	28	24	29	23	26	585
586	2	3	8	1	4	6	0	9	15	11	10	7	5	16	13	25	14	17	27	12	19	18	20	21	22	28	24	29	23	26	586
587	2	3	8	1	5	6	0	9	15	11	10	7	4	16	12	24	14	17	26	13	19	18	21	20	23	28	25	29	22	27	587
588	2	3	8	1	5	6	0	9	15	11	10	7	4	16	12	24	13	17	26	14	19	18	21	20	23	27	25	29	22	28	588
589	2	3	9	0	4	7	1	8	14	10	11	6	5	17	13	25	12	16	27	15	18	19	20	21	22	26	24	29	23	28	589
590	2	3	9	0	4	7	1	8	14	10	11	6	5	17	13	25	12	16	27	15	18	19	20	21	22	26	24	29	23	28	590
591	2	3	8	1	5	6	0	9	15	11	10	7	4	16	12	25	13	17	26	14	19	18	21	20	23	27	24	29	22	28	591
592	2	3	8	1	5	6	0	9	15	11	10	7	4	16	12	25	14	17	26	13	19	18	21	20	23	28	24	29	22	27	592
593	2	3	8	1	5	7	0	9	15	11	10	6	4	16	12	25	14	17	26	13	19	18	20	21	22	28	24	29	23	27	593
594	2	3	8	1	5	7	0	9	15	11	10	6	4	16	12	25	14	17	26	13	19	18	20	21	22	27	24	29	23	28	594
595	2	3	9	0	5	7	1	8	15	11	10	6	4	16	13	24	14	17	27	12	19	18	21	20	22	26	25	29	23	28	595
596	2	4	9	0	5	7	1	8	15	11	10	6	3	16	13	24	14	17	27	12	19	18	22	20	21	26	25	29	23	28	596
597	2	4	8	1	5	6	0	9	14	11	10	7	3	16	12	25	15	17	26	13	19	18	22	20	21	27	24	29	23	28	597
598	1	3	8	2	5	6	0	9	14	11	10	7	4	16	12	26	15	17	25	13	19	18	21	20	22	27	24	29	23	28	598
599	1	3	8	2	5	6	0	9	15	11	10	7	4	16	13	26	14	17	24	12	19	18	21	20	22	27	25	29	23	28	599
600	2	4	8	1	5	6	0	9	15	11	10	7	3	16	13	25	14	17	24	12	19	18	21	20	22	27	26	29	23	28	600
601	2	4	9	0	5	7	1	8	14	11	10	6	3	16	12	24	15	17	25	13	19	18	21	20	23	26	27	29	22	28	601
602	2	4	9	0	5	7	1	8	14	11	10	6	3	16	12	24	15	17	25	13	19	18	21	20	23	26	27	29	22	28	602
603	2	4	8	1	5	7	0	9	14	11	10	6	3	16	13	25	15	17	24	12	19	18	21	20	22	27	26	28	23	29	603
604	2	4	8	1	5	7	0	9	14	11	10	6	3	16	13	25	15	17	24	12	19	18	21	20	22	27	26	28	23	29	604
605	2	4	9	0	5	7	1	8	14	11	10	6	3	16	12	25	15	17	24	13	19	18	21	20	22	27	26	29	23	28	605
606	2	4	9	0	5	7	1	8	14	11	10	6	3	15	12	25	16	17	24	13	20	18	21	19	22	27	26	29	23	28	606
607	2	5	8	1	4	7	0	9	14	11	10	6	3	15	12	24	16	17	25	13	20	18	21	19	23	27	26	29	22	28	607
608	2	5	8	1	4	7	0	9	14	11	10	6	3	15	12	24	16	18	25	13	20	17	21	19	23	28	26	29	22	27	608
609	2	5	9	0	4	6	1	8	15	11	10	7	3	14	12	25	16	18	24	13	20	17	21	19	22	28	26	29	23	27	609
610	2	5	9	0	4	6	1	8	15	11	10	7	3	14	12	25	16	18	24	13	20	17	21	19	22	27	26	29	23	28	610
611	2	5	8	1	4	7	0	9	14	11	10	6	3	15	12	24	16	18	25	13	20	17	21	19	22	27	26	29	23	28	611
612	2	5	8	1	4	7	0	9	14	12	10	6	3	16	11	24	15	18	26	13	20	17	21	19	22	28	25	29	23	27	612
613	2	4	9	0	5	6	1	8	15	13	11	7	3	16	10	25	14	19	27	12	21	17	20	18	23	28	24	29	22	26	613
614	2	4	9	0	5	6	1	8	15	13	11	7	3	16	10	25	14	19	27	12	21	17	20	18	23	28	24	29	22	26	614
615	2	5	8	1	4	7	0	9	14	12	10	6	3	16	11	24	15	18	26	13	21	17	20	19	23	28	25	29	22	27	615
616	2	5	8	1	4	7	0	9	14	11	10	6	3	16	12	24	15	17	25	13	21	18	20	19	23	27	26	29	22	28	616
617	2	4	9	0	5	6	1	8	15	10	11	7	3	16	13	25	14	17	24	12	20	18	21	19	22	26	27	28	23	29	617
618	2	4	9	0	5	6	1	8	16	10	11	7	3	15	13	25	14	17	24	12	19	18	21	20	22	26	27	28	23	29	618
619	2	5	8	1	4	7	0	9	16	11	10	6	3	14	12	24	15	17	25	13	19	18	20	21	23	27	26	29	22	28	619
620	2	5	8	1	4	7	0	9	16	12	10	6	3	14	11	24	15	17	25	13	20	18	19	21	23	27	26	29	22	28	620
621	2	4	9	0	5	7	1	8	16	13	10	6	3	15	11	24	14	17	25	12	21	18	19	20	23	26	27	28	22	29	621
622	2	3	9	0	5	7	1	8	16	13	10	6	4	15	11	24	14	17	26	12	21	18	19	20	23	25	27	28	22	29	622
623	2	3	8	0	5	7	1	9	16	12	10	6	4	14	11	24	15	17	26	13	21	18	19	20	23	25	27	29	22	28	623
624	2	4	7	0	5	8	1	9	16	12	10	6	3	14	11	24	15	17	25	13	21	18	19	20	23	26	27	29	22	28	624
625	2	5	7	1	4	8	0	9	16	12	10	6	3	15	11	24	14	17	25	13	20	18	19	21	23	27	26	29	22	28	625
626	2	5	8	1	4	7	0	9	16	12	10	6	3	15	11	24	14	17	25	13	20	18	19	21	23	27	26	29	22	28	626
627	2	4	9	1	5	7	0	8	16	12	10	6	3	15	11	24	14	17	25	13	20	18	19	21	23	27	26	29	22	28	627
628	2	4	9	1	6	7	0	8	16	11	10	5	3	15	12	23	13	17	26	14	20	18	19	21	24	27	25	29	22	28	628
629	2	5	8	0	6	7	1	9	16	10	11	4	3	15	13	23	12	17	27	14	21	19	18	20	24	26	25	29	22	28	629
630	2	6	7	0	5	8	1	9	16	10	11	4	3	15	13	23	12	17	27	14	21	19	18	20	24	25	26	29	22	28	630
631	2	6	7	1	4	8	0	9	16	11	10	5	3	15	12	23	13	17	26	14	20	19	18	21	24	25	27	29	22	28	631
632	2	5	8	1	4	7	0	9	16	12	10	6	3	15	11	23	13	17	25	14	20	19	18	21	24	26	27	29	22	28	632
633	2	4	9	0	5	7	1	8	16	12	11	6	3	14	10	23	13	17	25	15	20	18	19	21	24	27	26	29	22	28	633
634	2	4	9	0	6	7	1	8	16	11	12	5	3	13	10	24	14	17	26	15	19	18	20	22	23	27	25	29	21	28	634
635	2	4	8	1	6	7	0	9	16	10	12	5	3	13	11	24	15	17	27	14	19	18	20	22	23	26	25	29	21	28	635
636	2	3	7	1	5	8	0	9	16	10	11	6	4	14	12	23	15	17	27	13	20	18	19	21	24	25	26	29	22	28	636
637	2	3	7	1	5	8	0	9	16	11	10	6	4	15	12	23	14	17	26	13	20	18	19	21	24	25	27	28	22	29	637
638	1	4	8	2	6	7	0	10	16	12	9	5	3	15	11	24	13	18	25	14	19	17	20	22	23	26	28	27	21	29	638
639	1	4	8	2	6	7	0	10	16	12	9	5	3	14	11	24	13	18	25	15	19	17	20	23	22	26	28	27	21	29	639
640	2	3	8	1	6	7	0	9	16	11	10	5	4	13	12	24	14	17	25	15	20	18	19	23	22	26	27	28	21	29	640
641	2	3	8	0	6	7	1	9	16	11	10	5	4	13	12	24	15	17	25	14	20	18	19	22	23	27	26	29	21	28	641
642	2	3	8	0	5	7	1	9	16	12	10	6	4	14	11	24	15	17	25	13	20	18	19	22	23	27	26	29	21	28	642
643	2	3	8	1	5	7	0	9	16	12	10	6	4	15	11	24	14	17	25	13	20	18	19	23	22	26	27	29	21	28	643
644	2	4	8	1	6	7	0	9	16	11	10	5	3	15	12	24	14	17	26	13	20	18	19	23	22	25	27	29	21	28	644
645	2	4	8	0	6	7	1	9	16	11	10	5	3	14	12	24	15	17	27	13	20	18	19	22	23	25	26	29	21	28	645
646	2	4	8	0	6	7	1	9	16	11	10	5	3	13	12	24	15	17	27	14	20	18	19	21	23	25	26	29	22	28	646
647	2	4	8	1	7	6	0	9	16	11	10	5	3	13	12	24	14	17	27	15	20	18	19	21	23	25	26	29	22	28	647
648	2	4	8	1	7	6	0	9	16	11	10	5	3	14	12	24	13	17	27	15	20	18	19	22	23	25	26	29	21	28	648
649	2	4	8	1	7	6	0	9	16	11	10	5	3	15	12	24	13	17	27	14	21	18	19	22	23	25	26	29	20	28	649
650	2	4	8	1	7	6	0	9	16	11	10	5	3	15	12	24	13	17	27	14	21	18	19	22	23	25	26	29	20	28	650
651	2	4	8	0	7	6	1	9	16	11	10	5	3	14	12	24	13	17	27	15	20	18	19	23	22	25	26	29	21	28	651
652	2	3	7	0	8	5	1	9	16	11	10	6	4	14	12	24	13	18	27	15	20	17	19	23	21	26	25	29	22	28	652
653	2	3	7	1	8	5	0	9	16	11	10	6	4	15	12	24	13	18	27	14	20	17	19	23	21	26	25	29	22	28	653
654	2	4	8	1	7	6	0	9	16	11	10	5	3	15	12	24	13	17	27	14	20	18	19	23	22	25	26	29	21	28	654
655	2	4	8	1	7	6	0	9	16	11	10	5	3	15	12	24	13	17	27	14	21	18	19	22	23	25	26	29	20	28	655
656	2	3	7	1	8	5	0	9	15	12	10	6	4	16	11	24	14	18	28	13	22	17	19	21	23	26	25	29	20	27	656
657	2	3	7	0	8	4	1	9	15	12	10	6	5	17	11	24	14	18	28	13	23	16	19	21	22	26	25	29	20	27	657
658	2	3	8	0	7	4	1	9	15	11	10	6	5	18	12	24	13	17	27	14	23	16	19	22	21	25	26	29	20	28	658
659	2	3	8	1	7	5	0	9	15	11	10	6	4	18	13	24	12	16	26	14	22	17	19	23	21	25	27	29	20	28	659
660	2	4	8	1	7	5	0	9	15	11	10	6	3	17	13	24	12	16	26	14	21	18	19	23	22	25	27	29	20	28	660
661	2	5	8	1	7	4	0	9	15	11	10	6	3	17	12	24	13	16	27	14	21	18	19	22	23	25	26	28	20	29	661
662	2	5	8	1	7	4	0	10	15	11	9	6	3	17	12	24	13	16	27	14	21	18	19	22	23	25	26	28	20	29	662
663	2	4	8	1	7	5	0	10	15	11	9	6	3	17	13	24	12	16	26	14	20	18	19	23	22	25	27	29	21	28	663
664	1	3	7	2	8	6	0	9	16	12	10	5	4	18	14	24	11	15	25	13	20	17	19	23	21	26	28	29	22	27	664
665	1	3	7	2	8	6	0	9	16	12	10	5	4	18	14	24	11	15	25	13	20	17	19	22	21	27	28	29	23	26	665
666	2	4	8	1	7	5	0	10	15	11	9	6	3	17	13	24	12	16	25	14	20	18	19	21	22	27	28	29	23	26	666
667	3	4	9	1	6	5	0	10	15	11	8	7	2	16	12	24	13	17	25	14	21	18	19	20	23	26	28	29	22	27	667
668	3	4	9	1	5	6	0	10	15	11	8	7	2	16	12	24	13	17	26	14	21	18	19	20	23	25	27	29	22	28	668
669	2	4	8	0	5	7	1	10	14	11	9	6	3	17	13	25	12	16	27	15	20	18	19	21	22	24	26	29	23	28	669
670	2	3	8	0	6	7	1	9	13	11	10	5	4	17	14	25	12	16	27	15	20	18	19	22	21	24	26	29	23	28	670
671	2	3	9	1	6	7	0	8	13	11	10	5	4	16	15	24	12	17	26	14	20	18	19	23	21	25	27	29	22	28	671
672	2	4	9	1	5	7	0	8	14	11	10	6	3	16	15	24	12	17	26	13	20	18	19	23	22	25	27	29	21	28	672
673	3	4	8	0	5	6	1	9	15	11	10	7	2	16	14	24	13	17	27	12	21	18	19	22	23	25	26	29	20	28	673
674	4	3	7	0	6	5	1	10	16	12	9	8	2	15	13	23	14	18	28	11	22	17	19	21	24	26	25	29	20	27	674
675	4	3	7	1	6	5	0	10	16	12	9	8	2	15	13	23	14	18	28	11	22	17	19	21	24	26	25	29	20	27	675
676	3	4	8	1	5	6	0	9	16	11	10	7	2	15	14	24	13	17	27	12	21	18	19	22	23	25	26	29	20	28	676
677	2	4	9	0	5	7	1	8	16	11	10	6	3	15	14	24	12	17	26	13	21	18	19	22	23	25	27	29	20	28	677
678	2	4	9	0	5	7	1	8	16	11	10	6	3	15	14	24	12	17	25	13	22	18	19	21	23	26	28	29	20	27	678
679	3	4	9	0	5	7	1	8	16	11	10	6	2	15	14	24	13	17	25	12	22	18	19	21	23	26	28	29	20	27	679
680	3	4	9	0	5	7	1	8	16	11	10	6	2	15	13	24	14	17	26	12	21	18	19	22	23	25	27	29	20	28	680
681	3	4	9	1	5	7	0	8	17	11	10	6	2	15	13	24	14	16	26	12	20	18	19	22	23	25	27	29	21	28	681
682	3	4	9	1	5	7	0	8	18	11	10	6	2	15	13	24	14	16	25	12	20	17	19	22	23	26	27	29	21	28	682
683	3	4	9	1	5	7	0	8	18	11	10	6	2	15	13	24	14	16	25	12	20	17	19	23	22	26	27	29	21	28	683
684	3	4	9	1	5	7	0	8	17	11	10	6	2	15	13	24	14	16	26	12	20	18	19	23	22	25	27	29	21	28	684
685	2	5	8	0	4	6	1	9	16	11	10	7	3	14	12	24	15	17	27	13	21	18	19	22	23	25	26	29	20	28	685
686	2	5	8	0	4	6	1	9	16	12	10	7	3	13	11	23	15	18	27	14	22	17	19	21	24	26	25	29	20	28	686
687	3	4	9	1	5	7	0	8	17	12	10	6	2	13	11	23	14	18	26	15	22	16	19	21	24	27	25	29	20	28	687
688	3	4	9	1	5	7	0	8	18	11	10	6	2	13	12	23	14	17	25	15	21	16	19	22	24	27	26	29	20	28	688
689	2	4	9	1	5	6	0	8	18	11	10	7	3	13	12	22	15	17	25	14	20	16	19	23	24	26	27	29	21	28	689
690	2	4	9	1	5	6	0	8	18	11	10	7	3	14	12	22	15	17	26	13	20	16	19	23	24	25	27	29	21	28	690
691	2	4	9	1	5	7	0	8	18	11	10	6	3	14	12	23	15	17	27	13	21	16	19	22	24	25	26	29	20	28	691
692	2	3	9	1	5	7	0	8	18	11	10	6	4	13	12	23	15	17	27	14	21	16	19	22	24	25	26	29	20	28	692
693	2	3	9	0	5	6	1	8	18	11	10	7	4	12	13	22	15	17	26	14	20	16	19	23	24	25	27	29	21	28	693
694	2	4	9	0	5	6	1	8	17	11	10	7	3	12	13	21	15	18	25	14	20	16	19	23	24	26	27	29	22	28	694
695	2	4	9	1	5	7	0	8	16	11	10	6	3	13	12	20	14	18	25	15	21	17	19	23	24	27	26	29	22	28	695
696	2	4	9	1	5	7	0	8	16	11	10	6	3	14	12	20	13	18	25	15	21	17	19	24	23	27	26	29	22	28	696
697	2	4	9	1	5	6	0	8	17	11	10	7	3	15	13	21	12	18	25	14	20	16	19	24	23	26	27	29	22	28	697
698	2	3	9	1	5	6	0	8	17	11	10	7	4	15	14	22	12	18	26	13	20	16	19	23	24	25	27	29	21	28	698
699	2	3	9	1	5	6	0	8	16	11	10	7	4	15	14	23	13	18	26	12	20	17	19	22	24	25	27	29	21	28	699
700	2	4	9	1	5	6	0	8	16	11	10	7	3	15	13	23	14	18	25	12	19	17	20	22	24	26	27	29	21	28	700
701	2	4	9	0	5	6	1	8	17	11	10	7	3	14	12	22	15	18	25	13	19	16	20	23	24	27	26	29	21	28	701
702	2	3	9	0	5	6	1	8	17	11	10	7	4	14	12	22	15	18	25	13	19	16	20	23	24	27	26	29	21	28	702
703	2	3	8	1	5	6	0	9	16	11	10	7	4	15	13	23	14	18	24	12	19	17	20	22	25	26	27	29	21	28	703
704	2	4	8	1	5	6	0	9	16	11	10	7	3	15	13	23	14	18	24	12	19	17	20	22	25	26	27	29	21	28	704
705	2	4	9	1	5	6	0	8	16	11	10	7	3	15	13	22	14	18	25	12	19	17	20	23	24	27	26	29	21	28	705
706	2	3	9	1	5	6	0	8	16	11	10	7	4	15	14	22	13	18	25	12	19	17	20	23	24	27	26	29	21	28	706
707	2	3	9	1	5	6	0	8	16	11	10	7	4	15	14	22	13	18	25	12	19	17	20	23	24	27	26	29	21	28	707
708	2	4	9	1	5	6	0	8	16	12	10	7	3	15	13	22	14	18	25	11	19	17	20	23	24	27	26	29	21	28	708
709	2	4	9	1	5	6	0	8	16	12	10	7	3	15	13	22	14	18	25	11	19	17	21	23	24	26	27	29	20	28	709
710	2	3	9	1	5	6	0	8	16	11	10	7	4	15	14	22	13	18	25	12	19	17	21	23	24	26	27	29	20	28	710
711	2	3	9	0	4	6	1	8	16	11	10	7	5	14	15	23	12	19	24	13	18	17	21	22	25	27	26	29	20	28	711
712	2	3	9	0	4	6	1	8	16	11	10	7	5	14	15	23	12	19	24	13	18	17	21	22	25	27	26	29	20	28	712
713	2	3	9	1	5	6	0	8	16	11	10	7	4	15	14	22	12	19	25	13	18	17	21	23	24	26	27	29	20	28	713
714	2	3	9	1	5	6	0	8	16	11	10	7	4	15	14	21	12	19	25	13	18	17	22	23	24	26	27	29	20	28	714
715	2	3	8	0	4	6	1	9	16	11	10	7	5	14	15	20	13	18	24	12	19	17	23	22	25	27	26	28	21	29	715
716	2	3	8	0	4	6	1	9	16	11	10	7	5	14	15	20	13	18	24	12	19	17	23	22	25	27	26	28	21	29	716
717	2	3	9	1	5	6	0	8	16	11	10	7	4	15	14	21	13	19	25	12	18	17	22	23	24	26	27	28	20	29	717
718	2	3	9	1	5	6	0	8	16	12	10	7	4	15	14	21	13	19	25	11	18	17	22	23	24	26	27	28	20	29	718
719	2	3	9	1	5	6	0	8	16	12	10	7	4	14	15	20	13	18	24	11	19	17	23	22	25	26	27	29	21	28	719
720	2	3	9	1	6	5	0	8	16	11	10	7	4	13	15	20	14	18	24	12	19	17	23	22	25	26	28	29	21	27	720
721	2	3	8	1	6	5	0	9	16	11	10	7	4	13	15	21	14	19	25	12	18	17	23	22	24	26	28	29	20	27	721
722	2	3	8	1	5	6	0	9	16	11	10	7	4	14	15	21	13	19	25	12	18	17	23	22	24	26	28	29	20	27	722
723	2	3	9	1	5	7	0	8	16	11	10	6	4	15	14	21	13	19	25	12	18	17	22	23	24	26	28	29	20	27	723
724	2	3	9	1	5	7	0	8	16	12	10	6	4	15	14	22	13	19	25	11	18	17	21	23	24	26	28	29	20	27	724
725	2	3	8	0	5	6	1	9	16	12	10	7	4	14	15	23	13	18	25	11	19	17	21	22	24	26	28	29	20	27	725
726	2	3	8	0	5	6	1	9	16	11	10	7	4	13	15	23	14	18	25	12	19	17	22	21	24	26	27	29	20	28	726
727	2	3	9	1	5	6	0	8	16	11	10	7	4	13	14	22	15	19	25	12	18	17	23	21	24	26	27	29	20	28	727
728	2	4	9	1	5	6	0	8	16	12	10	7	3	14	13	21	15	19	25	11	18	17	23	22	24	26	27	29	20	28	728
729	2	4	8	0	5	7	1	9	16	12	10	6	3	15	13	21	14	19	24	11	18	17	22	23	25	27	26	29	20	28	729
730	2	3	8	0	6	7	1	9	16	11	10	5	4	15	14	22	13	19	24	12	18	17	21	23	25	27	26	29	20	28	730
731	2	3	9	1	6	7	0	8	16	11	10	5	4	14	15	22	13	18	24	12	19	17	21	23	25	26	27	29	20	28	731
732	2	4	9	1	5	7	0	8	16	12	10	6	3	14	15	22	13	18	24	11	19	17	21	23	25	26	27	29	20	28	732
733	2	5	8	0	4	6	1	9	16	13	11	7	3	15	14	23	12	19	25	10	18	17	20	22	24	27	26	29	21	28	733
734	2	5	8	0	4	6	1	9	16	13	11	7	3	15	14	23	12	19	25	10	17	18	20	22	24	28	26	29	21	27	734
735	2	4	9	1	5	7	0	8	16	12	10	6	3	14	15	23	13	19	25	11	17	18	21	22	24	28	26	29	20	27	735
736	2	3	9	1	6	7	0	8	16	12	10	5	4	13	15	23	14	19	25	11	18	17	22	21	24	27	26	29	20	28	736
737	2	3	9	0	7	6	1	8	16	12	11	5	4	13	14	22	15	19	24	10	18	17	23	21	25	26	27	29	20	28	737
738	2	3	9	0	7	5	1	8	16	12	11	6	4	14	13	22	15	19	24	10	18	17	23	21	25	26	28	29	20	27	738
739	2	3	9	1	7	5	0	8	16	12	10	6	4	14	13	23	15	19	24	11	18	17	22	21	25	26	28	29	20	27	739
740	2	4	9	1	7	6	0	8	16	11	10	5	3	13	14	23	15	19	24	12	18	17	21	22	26	25	27	29	20	28	740
741	2	4	9	1	6	7	0	8	16	11	10	5	3	13	14	23	15	19	24	12	18	17	21	22	26	25	27	29	20	28	741
742	2	3	9	1	6	7	0	8	16	12	10	5	4	13	14	23	15	19	24	11	18	17	21	22	25	26	28	29	20	27	742
743	2	3	9	0	7	6	1	8	16	13	11	5	4	12	15	22	14	19	24	10	18	17	20	23	25	27	28	29	21	26	743
744	2	3	9	0	7	6	1	8	16	13	11	5	4	12	15	22	14	19	24	10	18	17	20	23	25	27	28	29	21	26	744
745	2	3	9	1	7	6	0	8	16	12	10	5	4	13	14	23	15	19	24	11	18	17	21	22	25	26	28	29	20	27	745
746	2	4	9	1	7	6	0	8	16	11	10	5	3	14	13	23	15	19	24	12	18	17	21	22	25	26	28	29	20	27	746
747	2	4	9	0	7	6	1	8	16	11	10	5	3	15	13	22	14	19	24	12	18	17	21	23	25	27	28	29	20	26	747
748	2	3	10	0	7	5	1	8	16	11	9	6	4	15	13	22	14	19	24	12	18	17	21	23	25	27	28	29	20	26	748
749	2	3	10	1	6	5	0	8	16	11	9	7	4	14	13	22	15	19	25	12	18	17	21	23	24	26	28	29	20	27	749
750	2	4	9	1	5	6	0	8	16	12	10	7	3	14	13	21	15	20	25	11	18	17	22	24	23	26	28	29	19	27	750
751	2	4	9	1	5	6	0	8	16	12	10	7	3	15	13	21	14	20	25	11	18	17	22	24	23	27	28	29	19	26	751
752	2	4	10	1	6	5	0	8	15	11	9	7	3	16	13	22	14	19	26	12	18	17	21	23	24	28	27	29	20	25	752
753	2	5	11	0	7	4	1	8	14	10	9	6	3	16	13	23	15	18	27	12	19	17	21	22	24	28	26	29	20	25	753
754	2	5	11	0	7	4	1	8	14	10	9	6	3	16	13	23	15	18	27	12	20	17	21	22	24	28	26	29	19	25	754
755	2	4	10	1	7	5	0	8	15	11	9	6	3	16	13	22	14	18	26	12	20	17	21	23	24	28	27	29	19	25	755
756	2	4	10	1	7	5	0	8	15	11	9	6	3	16	13	21	14	18	26	12	19	17	22	23	24	27	28	29	20	25	756
757	2	4	11	1	7	5	0	8	14	10	9	6	3	16	13	21	15	19	26	12	18	17	22	23	24	27	28	29	20	25	757
758	2	3	11	1	8	6	0	7	13	10	9	5	4	16	14	22	15	19	25	12	18	17	21	24	23	27	28	29	20	26	758
759	2	3	10	0	8	6	1	7	13	11	9	5	4	16	14	23	15	19	25	12	18	17	21	24	22	26	29	28	20	27	759
760	2	4	10	0	7	5	1	8	14	11	9	6	3	16	13	23	15	19	25	12	18	17	21	24	22	26	29	28	20	27	760
761	2	4	11	1	7	5	0	8	15	10	9	6	3	16	12	22	14	19	25	13	18	17	21	24	23	27	28	29	20	26	761
762	2	3	11	1	7	6	0	8	15	10	9	5	4	16	12	22	14	19	25	13	18	17	21	24	23	27	28	29	20	26	762
763	2	3	10	1	6	7	0	8	14	11	9	5	4	16	13	23	15	18	25	12	19	17	21	24	22	26	29	28	20	27	763
764	2	4	10	1	6	7	0	8	14	11	9	5	3	16	13	23	15	18	25	12	19	17	21	24	22	26	29	28	20	27	764
765	2	4	11	1	7	6	0	8	14	10	9	5	3	16	12	22	15	19	25	13	18	17	21	24	23	27	28	29	20	26	765
766	2	4	11	1	8	5	0	7	14	10	9	6	3	16	12	22	15	19	25	13	18	17	21	24	23	27	28	29	20	26	766
767	2	4	10	1	8	5	0	7	14	11	9	6	3	16	12	23	15	19	25	13	18	17	21	24	22	26	28	29	20	27	767
768	2	4	10	1	8	6	0	7	14	11	9	5	3	16	12	23	15	20	26	13	18	17	22	24	21	25	28	29	19	27	768
769	3	5	11	0	9	7	1	6	15	10	8	4	2	16	13	22	14	20	27	12	18	17	23	24	21	25	29	28	19	26	769
770	3	5	11	0	9	7	1	6	15	10	8	4	2	16	13	21	14	19	27	12	18	17	23	24	22	25	29	28	20	26	770
771	2	4	10	1	8	6	0	7	15	11	9	5	3	16	12	21	14	19	26	13	18	17	22	24	23	25	29	28	20	27	771
772	2	4	10	1	8	6	0	7	15	11	9	5	3	16	12	22	14	19	25	13	18	17	21	24	23	26	29	28	20	27	772
773	2	5	10	0	8	7	1	6	14	11	9	4	3	16	13	23	15	19	25	12	18	17	21	24	22	27	29	28	20	26	773
774	2	5	10	0	8	7	1	6	14	11	9	4	3	16	13	23	15	19	25	12	18	17	21	24	22	27	29	28	20	26	774
775	2	4	10	1	8	6	0	7	15	11	9	5	3	16	13	22	14	19	25	12	18	17	21	24	23	26	29	28	20	27	775
776	2	4	10	1	8	6	0	7	15	11	9	5	3	16	13	21	14	20	25	12	18	17	22	23	24	26	29	28	19	27	776
777	2	5	10	1	8	6	0	7	14	11	9	4	3	16	13	21	15	20	25	12	18	17	22	23	24	27	28	29	19	26	777
778	2	6	9	1	7	5	0	8	13	11	10	4	3	16	14	22	15	19	25	12	18	17	21	24	23	27	28	29	20	26	778
779	2	6	9	0	7	4	1	8	13	10	11	5	3	17	15	23	14	19	25	12	18	16	21	24	22	26	29	28	20	27	779
780	2	5	9	0	8	4	1	7	14	10	11	6	3	17	15	24	13	20	25	12	18	16	21	23	22	26	29	28	19	27	780
781	2	4	9	1	8	5	0	7	15	11	10	6	3	16	14	25	13	20	24	12	18	17	21	22	23	27	28	29	19	26	781
782	2	4	10	1	7	6	0	8	15	11	9	5	3	16	13	25	14	20	24	12	18	17	22	21	23	27	28	29	19	26	782
783	2	4	10	1	7	6	0	8	15	11	9	5	3	16	13	24	14	20	25	12	18	17	23	21	22	27	28	29	19	26	783
784	2	4	10	1	7	5	0	8	15	11	9	6	3	16	13	24	14	20	25	12	18	17	23	22	21	27	28	29	19	26	784
785	2	5	10	1	7	4	0	8	14	11	9	6	3	17	13	24	15	20	25	12	18	16	22	23	21	27	28	29	19	26	785
786	2	5	10	1	7	4	0	8	14	11	9	6	3	17	13	23	15	20	25	12	18	16	21	24	22	28	27	29	19	26	786
787	2	4	10	0	6	5	1	8	15	11	9	7	3	16	12	22	14	20	25	13	18	17	21	24	23	29	27	28	19	26	787
788	2	4	10	0	5	6	1	8	15	11	9	7	3	16	12	22	14	20	25	13	18	17	21	24	23	29	27	28	19	26	788
789	2	4	10	1	5	7	0	8	15	11	9	6	3	16	13	23	14	20	25	12	19	17	21	24	22	28	27	29	18	26	789
790	2	4	9	1	6	7	0	8	15	11	10	5	3	16	13	24	14	20	25	12	19	17	22	23	21	27	28	29	18	26	790
791	2	5	9	0	7	6	1	8	14	11	10	4	3	17	12	24	15	20	25	13	18	16	23	22	21	26	28	29	19	27	791
792	2	5	10	0	7	6	1	8	14	11	9	4	3	17	12	24	16	20	25	13	18	15	23	21	22	26	28	29	19	27	792
793	2	5	10	1	6	7	0	8	15	11	9	4	3	17	12	24	16	20	25	13	19	14	23	21	22	26	28	29	18	27	793
794	2	6	9	1	5	8	0	7	16	12	10	3	4	17	11	23	15	20	26	14	19	13	24	22	21	25	27	29	18	28	794
795	2	6	9	0	5	8	1	7	16	12	10	3	4	17	11	22	15	20	26	14	19	13	24	23	21	25	27	29	18	28	795
796	1	5	10	0	6	7	2	8	15	11	9	4	3	17	12	21	16	19	25	13	20	14	24	23	22	26	28	29	18	27	796
797	1	5	10	0	6	7	2	8	14	11	9	4	3	17	12	21	16	19	25	13	20	15	24	22	23	26	28	29	18	27	797
798	2	5	9	0	6	7	1	8	13	11	10	4	3	17	12	22	15	20	25	14	19	16	24	21	23	26	28	29	18	27	798
799	2	5	9	1	7	6	0	8	13	10	11	4	3	16	12	23	15	20	24	14	19	17	25	21	22	27	28	29	18	26	799
800	2	5	9	1	7	6	0	8	13	10	11	4	3	16	12	23	15	19	24	14	20	17	25	21	22	27	28	29	18	26	800
801	2	5	9	1	6	7	0	8	13	10	11	4	3	16	12	22	15	19	25	14	20	17	24	21	23	26	28	29	18	27	801
802	2	6	9	1	5	7	0	8	13	10	11	4	3	16	12	22	15	20	25	14	19	17	24	21	23	26	27	29	18	28	802
803	2	6	9	1	5	7	0	8	12	10	11	4	3	17	13	23	15	20	25	14	19	16	24	21	22	26	27	29	18	28	803
804	1	5	10	2	6	8	0	7	12	9	11	3	4	17	14	23	16	19	25	13	20	15	24	22	21	26	28	29	18	27	804
805	1	5	10	2	6	8	0	7	12	9	11	3	4	16	14	23	17	19	24	13	20	15	25	22	21	27	28	29	18	26	805
806	2	6	9	1	5	7	0	8	12	10	11	4	3	15	13	23	17	19	24	14	20	16	25	21	22	28	27	29	18	26	806
807	2	6	9	0	5	7	1	8	13	10	11	4	3	15	12	22	17	19	25	14	21	16	24	20	23	28	27	29	18	26	807
808	2	5	10	0	6	7	1	8	13	9	11	4	3	16	12	22	17	19	25	14	21	15	24	20	23	27	28	29	18	26	808
809	2	5	10	1	6	7	0	8	12	9	11	4	3	17	13	23	16	19	24	14	21	15	25	20	22	27	29	28	18	26	809
810	2	6	9	1	5	7	0	8	12	10	11	4	3	17	13	23	16	19	24	14	21	15	25	20	22	27	29	28	18	26	810
811	2	6	9	0	5	7	1	8	13	10	11	4	3	17	12	22	16	19	24	14	21	15	25	20	23	27	28	29	18	26	811
812	2	6	9	0	5	7	1	8	13	10	11	4	3	17	12	22	16	20	24	14	21	15	25	19	23	27	28	29	18	26	812
813	2	6	9	1	5	7	0	8	12	10	11	4	3	16	13	22	17	20	25	15	21	14	24	19	23	27	28	29	18	26	813
814	2	5	10	1	6	7	0	8	12	9	11	4	3	16	13	21	17	20	25	15	22	14	24	19	23	28	27	29	18	26	814
815	2	5	10	0	6	7	1	8	12	9	11	4	3	16	13	21	17	20	25	14	22	15	24	19	23	28	27	29	18	26	815
816	2	5	10	0	6	7	1	8	12	9	11	4	3	16	13	22	17	19	25	14	21	15	24	20	23	28	27	29	18	26	816
817	2	5	11	1	7	6	0	8	13	9	10	4	3	16	12	23	17	19	25	15	21	14	24	20	22	28	27	29	18	26	817
818	2	5	11	1	7	6	0	8	14	9	10	4	3	16	12	23	17	19	25	15	21	13	24	20	22	28	27	29	18	26	818
819	2	5	10	0	6	7	1	8	15	9	11	4	3	16	13	22	17	18	24	14	20	12	25	21	23	28	26	29	19	27	819
820	2	6	9	0	5	7	1	8	16	10	11	3	4	15	14	22	17	18	24	13	20	12	25	21	23	28	26	29	19	27	820
821	2	7	9	1	5	6	0	8	17	11	10	3	4	14	15	23	16	19	25	12	21	13	24	20	22	29	27	28	18	26	821
822	2	7	10	1	5	6	0	8	17	11	9	4	3	14	15	23	16	19	25	12	21	13	24	20	22	29	27	28	18	26	822
823	3	6	11	0	4	7	1	8	16	10	9	5	2	15	14	22	17	18	24	13	20	12	25	21	23	28	26	29	19	27	823
824	3	6	11	0	4	7	1	8	16	9	10	5	2	15	13	22	17	18	24	14	20	12	25	21	23	28	26	29	19	27	824
825	2	6	11	0	5	7	1	8	16	9	10	4	3	15	13	22	17	19	25	14	20	12	24	21	23	28	26	29	18	27	825
826	2	5	11	0	6	7	1	8	16	9	10	4	3	15	13	22	17	19	25	14	20	12	24	21	23	28	26	29	18	27	826
827	2	5	11	0	6	7	1	8	16	9	10	4	3	15	13	22	17	19	24	14	20	12	25	21	23	29	26	28	18	27	827
828	2	6	11	0	5	7	1	8	16	10	9	4	3	15	13	22	17	19	24	14	20	12	25	21	23	29	26	28	18	27	828
829	2	6	11	0	5	7	1	8	16	10	9	4	3	15	12	23	17	19	25	14	20	13	24	21	22	28	26	29	18	27	829
830	2	6	11	0	5	7	1	8	16	9	10	3	4	15	12	24	17	19	25	13	20	14	23	22	21	28	26	29	18	27	830
831	2	7	10	0	5	6	1	8	16	9	11	3	4	15	13	25	17	19	24	12	20	14	23	22	21	28	27	29	18	26	831
832	1	8	9	0	6	5	2	7	15	10	12	4	3	16	14	25	17	19	23	11	20	13	24	21	22	28	27	29	18	26	832
833	1	8	9	0	6	5	2	7	15	10	12	4	3	16	14	25	17	19	23	11	20	13	24	21	22	29	26	28	18	27	833
834	2	7	10	0	5	6	1	8	16	9	11	4	3	15	13	25	17	19	24	12	20	14	23	22	21	29	26	28	18	27	834
835	2	6	11	0	5	7	1	8	16	9	10	4	3	15	13	25	17	19	24	12	20	14	23	22	21	28	27	29	18	26	835
836	2	6	11	0	5	7	1	8	16	10	9	4	3	15	13	25	17	19	24	12	20	14	23	22	21	28	27	29	18	26	836
837	2	6	10	0	5	7	1	8	16	11	9	4	3	15	12	24	17	19	25	13	20	14	23	22	21	29	26	28	18	27	837
838	2	5	9	0	6	7	1	8	16	11	10	4	3	15	12	23	17	19	25	13	20	14	24	21	22	29	26	27	18	28	838
839	2	5	9	0	6	7	1	8	16	10	11	4	3	14	13	23	17	19	24	12	21	15	25	20	22	28	26	27	18	29	839
840	1	6	10	0	5	8	2	7	15	9	12	3	4	14	13	24	17	19	23	11	22	16	26	20	21	27	25	28	18	29	840
841	1	6	11	0	5	8	2	7	15	9	13	3	4	14	12	24	17	18	23	10	22	16	26	21	20	27	25	29	19	28	841
842	2	5	12	0	6	7	1	8	16	9	13	4	3	14	11	23	17	18	24	10	21	15	25	22	20	28	26	29	19	27	842
843	2	5	13	0	6	7	1	8	17	9	12	4	3	15	10	23	16	19	25	11	21	14	24	22	20	29	26	28	18	27	843
844	1	5	13	0	6	7	2	8	17	9	12	4	3	15	10	23	16	19	25	11	21	14	24	22	20	29	26	28	18	27	844
845	1	5	12	0	6	7	2	8	16	9	13	4	3	14	11	22	17	18	25	10	20	15	24	23	21	28	27	29	19	26	845
846	1	5	12	0	6	8	2	7	16	9	13	4	3	14	11	22	17	18	25	10	20	15	24	23	21	28	27	29	19	26	846
847	1	5	13	0	6	8	2	7	16	9	12	4	3	15	10	23	17	18	25	11	20	14	24	22	21	28	26	29	19	27	847
848	2	6	13	0	5	7	1	8	15	9	11	4	3	16	10	23	17	18	26	12	20	14	24	21	22	28	25	29	19	27	848
849	2	6	12	0	5	7	1	8	15	9	10	4	3	16	11	23	17	18	26	13	20	14	24	21	22	28	25	29	19	27	849
850	1	5	12	0	6	7	2	8	16	9	10	4	3	15	11	23	17	18	25	13	20	14	24	22	21	28	26	29	19	27	850
851	1	5	13	0	6	7	2	8	16	9	10	4	3	15	11	23	17	19	25	12	20	14	24	22	21	29	26	28	18	27	851
852	1	5	13	0	6	7	2	8	16	9	10	4	3	15	12	23	17	19	25	11	20	14	24	22	21	29	26	28	18	27	852
853	1	5	12	0	7	6	2	8	16	9	10	4	3	15	13	22	17	19	25	11	21	14	24	23	20	28	27	29	18	26	853
854	2	5	11	0	7	6	1	8	15	9	10	4	3	16	13	22	17	19	25	12	21	14	24	23	20	28	27	29	18	26	854
855	2	5	11	0	6	7	1	8	15	9	10	4	3	16	12	23	17	19	25	13	20	14	24	22	21	29	26	28	18	27	855
856	1	5	12	0	6	7	2	8	15	9	10	4	3	16	11	23	17	19	25	13	20	14	24	22	21	29	26	28	18	27	856
857	1	5	12	0	6	7	2	8	15	9	10	4	3	17	11	22	16	19	25	13	20	14	24	23	21	29	27	28	18	26	857
858	1	5	11	0	6	8	2	7	15	9	10	4	3	17	12	22	16	19	25	13	20	14	23	24	21	29	27	28	18	26	858
859	1	5	10	0	7	8	2	6	14	9	11	4	3	16	13	23	17	19	25	12	20	15	22	24	21	28	26	29	18	27	859
860	1	5	10	0	7	8	2	6	14	9	11	4	3	16	13	24	17	20	25	12	19	15	22	23	21	28	26	29	18	27	860
861	0	5	11	1	6	8	3	7	15	9	10	4	2	17	12	24	16	20	25	13	19	14	23	22	21	29	27	28	18	26	861
862	0	5	11	1	6	8	3	7	15	9	10	4	2	17	12	23	16	19	25	13	20	14	24	22	21	29	27	28	18	26	862
863	1	4	10	0	7	8	2	6	14	9	11	5	3	16	13	22	17	19	24	12	20	15	25	23	21	28	26	29	18	27	863
864	1	4	10	0	7	8	2	6	14	9	11	5	3	16	13	22	17	19	24	12	20	15	25	23	21	28	26	29	18	27	864
865	1	5	10	0	6	8	3	7	15	9	11	4	2	16	12	23	17	19	25	13	20	14	24	22	21	28	26	29	18	27	865
866	1	5	10	0	6	8	3	7	15	9	11	4	2	16	12	23	17	20	25	13	19	14	24	22	21	28	26	29	18	27	866
867	0	4	11	1	7	8	2	6	14	9	10	5	3	17	12	22	16	20	25	13	19	15	24	23	21	28	27	29	18	26	867
868	0	4	11	1	8	7	2	6	13	9	10	5	3	17	12	21	16	20	25	14	19	15	24	23	22	28	27	29	18	26	868
869	1	5	10	0	8	7	3	6	13	9	11	4	2	17	12	21	16	20	25	14	19	15	24	22	23	28	26	29	18	27	869
870	1	6	9	0	7	8	3	5	14	10	12	4	2	17	11	22	15	20	25	13	19	16	24	21	23	28	26	29	18	27	870
871	1	6	9	0	7	8	3	5	14	10	12	4	2	17	11	22	15	20	24	13	19	16	25	21	23	28	26	29	18	27	871
872	1	5	9	0	7	8	3	6	14	10	11	4	2	17	12	21	16	20	24	13	19	15	25	22	23	28	26	29	18	27	872
873	1	5	9	0	7	8	3	6	14	11	10	4	2	16	12	21	17	20	24	13	19	15	25	22	23	28	26	29	18	27	873
874	1	5	9	0	7	8	3	6	14	11	10	4	2	16	12	22	17	20	24	13	19	15	25	21	23	28	26	29	18	27	874
875	1	4	9	0	6	8	2	7	15	10	11	5	3	16	13	23	17	20	25	12	19	14	24	21	22	28	27	29	18	26	875
876	1	4	10	0	6	8	2	7	15	9	11	5	3	16	13	23	17	20	25	12	19	14	24	21	22	28	27	29	18	26	876
877	0	5	11	1	7	9	3	6	14	8	10	4	2	17	12	22	16	21	24	13	18	15	25	20	23	28	26	29	19	27	877
878	0	5	11	1	7	9	3	6	14	8	10	4	2	17	12	22	16	21	24	13	18	15	25	20	23	28	26	29	19	27	878
879	1	4	10	0	6	8	2	7	15	9	11	5	3	16	13	23	17	20	25	12	19	14	24	21	22	28	27	29	18	26	879
880	1	4	9	0	6	8	2	7	16	10	11	5	3	15	13	23	17	20	25	12	19	14	24	21	22	28	27	29	18	26	880
881	0	5	9	1	7	8	3	6	16	11	10	4	2	14	12	22	17	20	24	13	18	15	25	21	23	29	26	28	19	27	881
882	0	5	10	1	7	8	3	6	16	11	9	4	2	14	12	21	17	20	24	13	18	15	25	22	23	29	26	28	19	27	882
883	1	5	10	0	6	8	3	7	16	11	9	4	2	15	13	21	17	20	25	12	18	14	24	22	23	28	26	29	19	27	883
884	1	5	9	0	6	7	3	8	16	12	10	4	2	15	13	22	17	20	25	11	18	14	24	21	23	28	26	29	19	27	884
885	1	4	9	0	7	6	3	8	16	13	11	5	2	14	12	23	17	21	24	10	19	15	25	20	22	28	27	29	18	26	885
886	1	4	9	0	7	6	3	8	16	13	11	5	2	14	12	23	17	21	24	10	19	15	25	20	22	28	27	29	18	26	886
887	1	5	9	0	6	7	3	8	16	12	10	4	2	14	13	22	17	21	24	11	19	15	25	20	23	28	26	29	18	27	887
888	1	5	9	0	6	7	3	8	16	12	10	4	2	14	13	21	17	22	24	11	19	15	26	20	23	28	25	29	18	27	888
889	1	4	9	0	6	7	3	8	17	12	11	5	2	15	13	21	16	23	24	10	19	14	26	20	22	28	25	29	18	27	889
890	1	4	9	0	6	8	3	7	17	12	11	5	2	15	13	21	16	23	24	10	19	14	26	20	22	28	25	29	18	27	890
891	1	5	9	0	6	8	3	7	16	12	10	4	2	14	13	21	17	22	24	11	19	15	26	20	23	29	25	28	18	27	891
892	1	6	10	0	5	7	3	8	16	11	9	4	2	13	14	22	17	21	24	12	20	15	25	19	23	29	26	28	18	27	892
893	1	6	10	0	5	7	3	8	17	11	9	4	2	13	14	23	16	21	24	12	20	15	25	19	22	28	26	29	18	27	893
894	2	5	9	0	6	8	4	7	17	12	10	3	1	14	13	23	15	22	24	11	19	16	26	20	21	27	25	29	18	28	894
895	2	5	9	0	6	8	4	7	17	12	10	3	1	14	13	22	15	23	24	11	19	16	26	20	21	27	25	29	18	28	895
896	1	5	9	0	6	7	3	8	17	12	10	4	2	13	14	21	16	23	24	11	19	15	25	20	22	28	26	29	18	27	896
897	1	5	9	0	6	7	3	8	17	12	10	4	2	13	14	21	16	22	24	11	19	15	25	20	23	28	26	29	18	27	897
898	1	5	9	0	6	7	3	8	17	12	10	4	2	14	13	21	16	22	24	11	19	15	25	20	23	27	26	29	18	28	898
899	1	4	9	0	7	6	3	8	17	12	11	5	2	15	13	21	16	23	24	10	19	14	25	20	22	27	26	29	18	28	899
900	1	4	9	0	7	6	3	8	17	12	11	5	2	15	13	21	16	23	24	10	19	14	25	20	22	28	26	29	18	27	900
901	1	5	9	0	6	7	3	8	17	12	10	4	2	14	13	21	16	23	24	11	19	15	25	20	22	29	26	28	18	27	901
902	2	6	10	0	5	7	3	8	17	11	9	4	1	13	14	22	16	24	23	12	19	15	25	20	21	29	26	28	18	27	902
903	2	6	10	0	5	7	3	8	17	11	9	4	1	13	14	22	16	24	23	12	19	15	25	20	21	28	26	29	18	27	903
904	1	5	9	0	6	7	3	8	17	12	10	4	2	14	13	21	16	23	24	11	19	15	25	20	22	28	26	29	18	27	904
905	1	4	9	0	7	6	3	8	17	12	11	5	2	15	13	21	16	22	24	10	18	14	25	20	23	28	27	29	19	26	905
906	1	4	9	0	7	6	3	8	17	12	11	5	2	15	13	21	16	22	24	10	18	14	25	20	23	28	27	29	19	26	906
907	1	5	9	0	6	7	3	8	17	12	10	4	2	15	13	21	16	23	24	11	18	14	25	20	22	28	26	29	19	27	907
908	1	5	10	0	6	7	3	8	17	11	9	4	2	15	13	22	16	23	24	12	18	14	25	19	21	28	26	29	20	27	908
909	1	5	10	0	6	7	2	8	17	11	9	4	3	15	13	22	16	23	24	12	18	14	25	19	21	28	26	29	20	27	909
910	1	5	9	0	6	7	2	8	17	12	10	4	3	15	13	21	16	23	24	11	18	14	25	19	22	28	26	29	20	27	910
911	0	4	8	1	7	6	2	9	16	13	11	5	3	14	12	20	17	22	25	10	19	15	24	18	23	28	27	29	21	26	911
912	0	4	8	1	7	6	2	9	16	13	11	5	3	14	12	20	17	22	25	10	19	15	24	18	23	28	27	29	21	26	912
913	1	5	9	0	6	7	2	8	17	12	10	4	3	15	13	21	16	23	24	11	18	14	25	19	22	28	26	29	20	27	913
914	2	5	10	0	6	7	1	8	17	12	9	4	3	15	13	21	16	23	24	11	18	14	25	19	22	27	26	29	20	28	914
915	2	4	10	0	7	6	1	8	17	13	9	5	3	14	12	20	16	22	25	11	19	15	24	18	23	26	27	29	21	28	915
916	1	4	10	0	7	6	2	8	17	13	9	5	3	14	12	20	16	22	25	11	19	15	24	18	23	26	27	29	21	28	916
917	1	5	10	0	6	7	2	8	17	12	9	4	3	15	13	21	16	23	24	11	18	14	25	19	22	27	26	29	20	28	917
918	1	5	10	0	6	7	2	8	17	11	9	4	3	15	13	21	16	23	24	12	18	14	25	19	22	28	26	29	20	27	918
919	1	5	10	0	6	7	2	8	17	11	9	4	3	14	13	21	16	23	25	12	19	15	24	18	22	28	26	29	20	27	919
920	2	6	9	0	5	8	1	7	17	12	10	3	4	14	13	22	15	24	26	11	20	16	23	18	21	27	25	29	19	28	920
921	2	6	9	0	5	8	1	7	17	13	10	3	4	15	12	22	14	24	26	11	20	16	23	18	21	27	25	29	19	28	921
922	1	5	10	0	6	7	2	8	17	13	9	4	3	16	12	21	14	23	25	11	19	15	24	18	22	28	26	29	20	27	922
923	1	5	10	0	6	7	3	8	17	12	9	4	2	16	13	21	15	23	25	11	19	14	24	18	22	28	26	29	20	27	923
924	1	5	10	0	6	7	3	8	17	12	9	4	2	15	13	22	16	23	25	11	19	14	24	18	21	27	26	29	20	28	924
925	1	5	10	0	6	7	2	8	17	13	9	4	3	14	12	23	16	22	25	11	18	15	24	19	21	26	27	29	20	28	925
926	1	5	10	0	6	7	2	8	17	13	9	4	3	14	12	23	15	22	25	11	18	16	24	19	21	26	27	29	20	28	926
927	1	5	10	0	6	7	2	8	17	13	9	4	3	15	12	22	14	23	24	11	19	16	25	18	21	27	26	29	20	28	927
928	2	5	10	0	6	8	1	7	17	14	9	4	3	16	11	21	13	23	24	12	20	15	26	18	22	28	25	29	19	27	928
929	2	5	10	0	6	8	1	7	17	14	9	4	3	16	11	21	13	22	24	12	20	15	26	18	23	28	25	29	19	27	929
930	1	5	10	0	6	7	2	8	17	13	9	4	3	16	11	21	14	22	24	12	19	15	25	18	23	27	26	29	20	28	930
931	1	5	10	0	7	6	2	8	17	13	9	4	3	16	11	21	15	23	24	12	19	14	25	18	22	26	27	29	20	28	931
932	2	5	9	0	8	6	1	7	17	14	10	4	3	15	12	22	16	23	24	11	20	13	26	18	21	25	28	29	19	27	932
933	2	5	9	0	8	6	1	7	17	14	10	4	3	15	12	22	16	23	24	11	20	13	26	19	21	25	28	29	18	27	933
934	1	5	10	0	7	6	2	8	17	13	9	4	3	15	11	21	16	23	24	12	19	14	25	20	22	26	27	29	18	28	934
935	1	5	10	0	6	7	2	8	17	13	9	4	3	15	11	21	16	23	24	12	19	14	25	20	22	27	26	29	18	28	935
936	2	5	10	0	6	7	1	8	17	13	9	4	3	15	11	22	16	23	24	12	20	14	25	19	21	27	26	29	18	28	936
937	2	5	10	0	7	6	1	8	17	13	9	4	3	14	11	22	16	23	24	12	20	15	25	19	21	26	27	29	18	28	937
938	1	5	10	0	7	6	2	8	17	13	9	4	3	14	12	21	16	23	24	11	19	15	25	20	22	26	27	29	18	28	938
939	1	5	10	0	7	6	2	8	17	13	9	4	3	14	12	21	16	23	24	11	19	15	25	20	22	27	26	29	18	28	939
940	2	6	9	0	7	5	1	8	17	14	10	3	4	13	11	22	15	23	24	12	20	16	26	19	21	28	25	29	18	27	940
941	2	6	9	0	7	5	1	8	17	14	10	3	4	13	11	23	15	22	24	12	20	16	26	19	21	28	25	29	18	27	941
942	1	5	10	0	7	6	2	8	17	13	9	4	3	14	11	23	16	21	24	12	19	15	25	20	22	28	26	29	18	27	942
943	1	4	11	0	6	7	2	8	17	13	9	5	3	15	10	22	16	21	24	12	18	14	25	20	23	28	27	29	19	26	943
944	2	4	12	0	6	8	1	7	17	13	9	5	3	15	10	21	16	22	24	11	18	14	26	19	23	27	28	29	20	25	944
945	2	5	12	0	6	8	1	7	17	13	9	4	3	15	10	21	16	22	24	11	18	14	26	19	23	27	28	29	20	25	945
946	2	5	11	0	6	7	1	8	17	13	9	4	3	15	10	21	16	22	24	12	18	14	25	20	23	28	27	29	19	26	946
947	2	4	10	0	7	6	1	8	17	12	9	5	3	14	11	21	16	23	24	13	19	15	25	20	22	28	26	29	18	27	947
948	1	4	10	0	7	6	2	8	17	12	9	5	3	14	11	22	16	23	24	13	19	15	25	20	21	27	26	29	18	28	948
949	0	5	11	1	6	7	3	9	16	13	8	4	2	15	10	23	17	22	25	12	18	14	24	20	21	26	27	29	19	28	949
950	0	6	12	1	5	7	3	9	16	14	8	4	2	15	10	23	17	21	25	11	18	13	24	19	22	26	28	29	20	27	950
951	1	6	12	0	5	7	2	8	17	14	9	4	3	15	10	22	16	21	24	11	18	13	25	19	23	27	28	29	20	26	951
952	2	5	11	0	6	7	1	8	17	13	9	4	3	15	10	21	16	22	24	12	18	14	25	20	23	27	28	29	19	26	952
953	2	4	10	0	7	6	1	8	16	12	9	5	3	14	11	21	17	23	25	13	19	15	24	20	22	26	28	29	18	27	953
954	1	4	10	0	7	6	2	8	16	12	9	5	3	14	11	21	17	23	25	13	19	15	24	20	22	26	28	29	18	27	954
955	1	5	10	0	6	7	2	8	17	13	9	4	3	15	11	21	16	23	24	12	18	14	25	20	22	26	28	29	19	27	955
956	2	5	10	0	6	7	1	8	17	14	9	4	3	15	11	22	16	23	24	12	18	13	26	20	21	25	27	29	19	28	956
957	2	4	10	0	7	6	1	8	17	14	9	5	3	15	11	23	16	22	24	12	19	13	26	20	21	25	27	29	18	28	957
958	1	4	10	0	7	6	2	8	18	13	9	5	3	15	11	23	16	21	24	12	19	14	25	20	22	26	28	29	17	27	958
959	1	5	11	0	6	7	2	8	18	12	9	4	3	15	10	22	16	21	24	13	19	14	25	20	23	27	28	29	17	26	959
960	2	5	11	0	6	7	1	8	17	12	9	4	3	15	10	21	16	22	24	14	19	13	25	20	23	27	28	29	18	26	960
961	2	4	10	0	7	6	1	8	17	13	9	5	3	15	11	21	16	23	24	14	19	12	25	20	22	26	28	29	18	27	961
962	1	4	9	0	7	6	2	8	18	14	10	5	3	15	11	22	16	23	24	13	19	12	26	20	21	25	27	29	17	28	962
963	1	5	9	0	7	6	2	8	18	14	10	4	3	15	11	22	16	23	24	12	19	13	26	20	21	25	27	29	17	28	963
964	2	5	10	0	7	6	1	8	18	14	9	4	3	15	11	22	16	23	24	12	19	13	25	20	21	26	27	29	17	28	964
965	2	5	11	0	7	6	1	8	18	14	9	4	3	15	10	23	16	22	24	12	19	13	25	20	21	27	26	29	17	28	965
966	2	5	11	0	7	6	1	8	18	14	9	4	3	16	10	23	15	22	24	12	19	13	25	20	21	28	26	29	17	27	966
967	2	4	10	0	6	7	1	8	18	15	9	5	3	16	11	22	14	23	24	13	19	12	25	20	21	28	27	29	17	26	967
968	1	4	10	0	6	7	2	8	17	15	9	5	3	16	11	22	14	23	24	13	19	12	25	20	21	28	27	29	18	26	968
969	1	5	11	0	7	6	2	8	17	14	9	4	3	16	10	23	15	22	25	12	19	13	24	20	21	28	26	29	18	27	969
970	2	5	11	0	8	6	1	7	17	14	9	4	3	15	10	23	16	22	25	12	19	13	24	20	21	27	26	29	18	28	970
971	2	4	10	0	8	7	1	6	17	14	9	5	3	15	11	22	16	23	24	13	19	12	25	21	20	26	27	29	18	28	971
972	1	4	10	0	7	8	2	6	17	14	9	5	3	16	11	22	15	23	24	13	19	12	25	21	20	26	27	29	18	28	972
973	1	5	11	0	6	8	2	7	17	14	9	4	3	16	10	22	15	23	24	13	19	12	25	20	21	27	26	29	18	28	973
974	1	5	11	0	6	8	2	7	17	14	9	4	3	15	10	21	16	23	24	13	19	12	25	20	22	27	26	29	18	28	974
975	1	5	10	0	7	8	2	6	17	14	9	4	3	15	11	21	16	23	24	12	19	13	25	20	22	26	27	29	18	28	975
976	1	5	10	0	8	7	2	6	17	14	9	4	3	16	11	22	15	23	24	12	19	13	26	20	21	25	27	29	18	28	976
977	1	4	11	0	8	6	2	7	17	14	9	5	3	16	10	23	15	22	24	13	19	12	27	21	20	25	26	28	18	29	977
978	1	4	11	0	8	6	2	7	17	14	9	5	3	16	10	23	15	21	24	13	19	12	27	22	20	26	25	28	18	29	978
979	1	5	10	0	8	6	2	7	17	14	9	4	3	16	11	23	15	21	24	12	19	13	26	22	20	27	25	29	18	28	979
980	1	5	10	0	8	6	2	7	17	13	9	4	3	16	11	23	15	22	24	12	19	14	25	21	20	27	26	29	18	28	980
981	1	5	10	0	8	6	2	7	17	12	9	4	3	16	11	22	15	23	24	13	19	14	25	20	21	26	27	29	18	28	981
982	1	5	10	0	8	6	2	7	17	12	9	4	3	16	11	21	15	23	24	14	19	13	25	20	22	26	27	29	18	28	982
983	1	4	10	0	8	7	2	6	17	13	9	5	3	16	11	20	15	22	24	14	19	12	25	21	23	27	26	28	18	29	983
984	1	4	9	0	8	7	2	6	17	13	10	5	3	15	11	20	16	22	24	14	19	12	25	21	23	27	26	28	18	29	984
985	0	4	9	1	8	6	2	7	17	12	10	5	3	15	11	20	16	23	24	14	19	13	25	21	22	26	27	29	18	28	985
986	0	4	9	1	8	6	2	7	17	12	10	5	3	15	11	20	16	23	24	14	19	13	25	21	22	26	27	29	18	28	986
987	1	5	9	0	8	7	2	6	17	12	10	4	3	15	11	20	16	22	24	14	19	13	25	21	23	27	26	28	18	29	987
988	2	5	10	0	8	7	1	6	17	11	9	4	3	15	12	20	16	22	24	13	19	14	26	21	23	27	25	28	18	29	988
989	2	4	10	1	8	6	0	7	17	11	9	5	3	14	12	21	16	23	25	13	19	15	27	20	22	26	24	28	18	29	989
990	2	4	9	1	8	6	0	7	17	12	10	5	3	14	11	21	16	23	25	13	19	15	27	20	22	26	24	28	18	29	990
991	2	5	9	0	8	7	1	6	17	12	10	4	3	15	11	20	16	22	25	13	19	14	26	21	23	27	24	29	18	28	991
992	1	5	9	0	8	7	2	6	17	11	10	4	3	15	12	20	16	21	25	13	19	14	26	22	23	27	24	29	18	28	992
993	1	4	9	0	8	7	2	6	17	11	10	5	3	15	12	20	16	21	25	13	19	14	27	22	23	26	24	29	18	28	993
994	2	4	9	0	8	7	1	6	17	12	10	5	3	15	11	20	16	22	25	13	19	14	27	21	23	26	24	29	18	28	994
995	2	4	9	0	8	6	1	7	17	12	10	5	3	15	11	20	16	23	25	13	19	14	26	21	22	27	24	29	18	28	995
996	1	4	10	0	8	6	2	7	17	12	9	5	3	15	11	20	16	23	25	14	19	13	26	21	22	27	24	29	18	28	996
997	1	4	10	0	8	7	2	6	17	12	9	5	3	15	11	20	16	22	25	14	19	13	26	21	23	27	24	29	18	28	997
998	2	4	9	0	8	7	1	6	18	12	10	5	3	15	11	20	16	21	26	14	19	13	25	22	23	27	24	29	17	28	998
999	2	4	9	0	8	7	1	6	18	12	10	5	3	15	11	20	16	21	26	14	19	13	25	22	23	27	24	29	17	28	999
1000	1	4	9	0	8	7	2	6	17	12	10	5	3	15	11	20	16	21	25	14	19	13	26	22	23	27	24	29	18	28	1000
1001	1	4	9	0	8	6	2	7	17	12	10	5	3	14	11	20	16	21	24	15	19	13	27	23	22	26	25	29	18	28	1001
1002	2	4	9	0	8	6	1	7	18	12	10	5	3	14	11	20	16	22	24	15	19	13	27	23	21	26	25	29	17	28	1002
1003	2	4	9	0	8	7	1	6	18	12	10	5	3	15	11	20	16	23	24	14	19	13	26	22	21	27	25	29	17	28	1003
1004	1	4	10	0	8	7	2	6	17	12	9	5	3	15	11	20	16	23	24	14	19	13	25	21	22	27	26	29	18	28	1004
1005	0	4	10	1	8	6	2	7	17	12	9	5	3	14	11	20	16	22	25	15	18	13	24	21	23	27	26	29	19	28	1005
1006	0	4	9	1	7	6	2	8	18	12	10	5	3	14	11	20	15	21	25	16	17	13	24	22	23	27	26	29	19	28	1006
1007	1	4	9	0	7	6	2	8	18	12	10	5	3	15	11	20	14	21	25	16	17	13	24	22	23	27	26	28	19	29	1007
1008	1	4	10	0	8	6	2	7	18	12	9	5	3	15	11	20	14	22	26	16	17	13	24	21	23	27	25	28	19	29	1008
1009	1	4	10	0	8	6	2	7	18	12	9	5	3	15	11	20	14	22	26	16	17	13	24	21	23	27	25	29	19	28	1009
1010	2	4	10	0	8	6	1	7	18	12	9	5	3	15	11	19	14	22	25	16	17	13	24	21	23	27	26	29	20	28	1010
1011	2	5	11	0	8	7	1	6	18	12	9	4	3	14	10	19	15	23	24	16	17	13	25	21	22	27	26	29	20	28	1011
1012	1	5	11	0	8	7	2	6	18	12	10	4	3	14	9	20	16	23	24	15	17	13	26	22	21	28	25	29	19	27	1012
1013	1	4	11	0	8	7	2	6	18	12	10	5	3	15	9	20	16	23	24	14	17	13	26	22	21	28	25	29	19	27	1013
1014	2	4	12	0	8	7	1	6	18	11	9	5	3	16	10	20	15	23	24	14	17	13	25	21	22	27	26	29	19	28	1014
1015	2	5	12	0	9	6	1	7	18	11	8	4	3	17	10	20	14	22	25	15	16	13	24	21	23	27	26	29	19	28	1015
1016	1	5	11	0	9	6	2	7	18	12	8	4	3	17	10	20	14	21	25	15	16	13	24	22	23	27	26	29	19	28	1016
1017	0	4	10	1	8	7	2	6	18	13	9	5	3	16	11	20	15	21	25	14	17	12	24	23	22	26	27	29	19	28	1017
1018	0	4	10	1	8	7	2	6	18	13	9	5	3	16	11	20	15	21	25	14	17	12	24	23	22	26	27	29	19	28	1018
1019	1	5	11	0	9	6	2	7	18	12	8	4	3	16	10	21	14	20	25	15	17	13	24	22	23	27	26	29	19	28	1019
1020	1	5	11	0	9	6	2	7	18	12	8	4	3	16	10	21	14	20	26	15	17	13	24	22	23	27	25	29	19	28	1020
1021	1	5	11	0	8	6	2	7	18	12	9	4	3	16	10	20	14	21	26	15	17	13	24	22	23	27	25	29	19	28	1021
1022	2	5	12	0	7	6	1	8	18	11	10	3	4	15	9	19	13	22	25	16	17	14	23	21	24	28	26	29	20	27	1022
1023	2	5	12	0	7	6	1	8	18	11	10	3	4	15	9	19	13	22	25	16	17	14	23	21	24	28	26	29	20	27	1023
1024	1	5	11	0	8	6	2	7	18	12	9	4	3	16	10	19	14	22	26	15	17	13	24	21	23	27	25	29	20	28	1024
1025	0	4	10	1	9	6	2	7	18	13	8	5	3	17	11	19	15	23	26	14	16	12	24	20	22	27	25	29	21	28	1025
1026	0	4	10	1	9	6	2	7	18	13	8	5	3	17	11	20	15	23	25	14	16	12	24	19	22	28	26	29	21	27	1026
1027	1	5	11	0	8	6	2	7	18	12	9	4	3	16	10	21	14	22	25	15	17	13	24	19	23	28	27	29	20	26	1027
1028	1	5	11	0	7	6	2	8	18	12	9	4	3	16	10	21	14	22	25	15	17	13	24	19	23	28	27	29	20	26	1028
1029	1	5	11	0	7	6	2	8	18	12	9	4	3	16	10	20	15	22	25	14	17	13	24	19	23	28	26	29	21	27	1029
1030	2	6	11	0	8	5	1	7	18	12	10	3	4	16	9	19	15	21	26	13	17	14	24	20	23	27	25	29	22	28	1030
1031	2	6	11	0	8	5	1	7	18	12	10	3	4	17	9	19	15	21	26	13	16	14	24	20	23	27	25	29	22	28	1031
1032	1	5	11	0	7	6	2	8	18	12	9	4	3	17	10	20	16	22	25	14	15	13	24	19	23	28	26	29	21	27	1032
1033	1	5	11	0	7	6	2	8	18	12	9	4	3	17	10	20	16	22	25	15	14	13	24	19	23	28	26	29	21	27	1033
1034	1	5	11	0	7	6	2	8	18	12	9	4	3	17	10	19	16	21	25	15	14	13	24	20	23	28	26	29	22	27	1034
1035	1	5	11	0	7	6	2	9	18	12	8	4	3	17	10	19	16	21	25	14	15	13	24	20	23	28	26	29	22	27	1035
1036	1	5	11	0	7	6	2	9	18	12	8	4	3	17	10	20	16	22	26	14	15	13	24	19	23	27	25	29	21	28	1036
1037	1	4	11	0	6	7	2	8	18	12	9	5	3	17	10	20	16	22	26	14	15	13	24	19	23	27	25	29	21	28	1037
1038	1	4	11	0	6	7	2	8	18	12	9	5	3	17	10	20	16	22	25	14	15	13	24	19	23	28	26	29	21	27	1038
1039	1	5	11	0	7	6	2	9	18	13	8	4	3	16	10	20	17	22	25	14	15	12	24	19	23	28	26	29	21	27	1039
1040	1	5	11	0	7	6	2	9	18	13	8	4	3	16	10	20	17	22	26	14	15	12	24	19	23	28	25	29	21	27	1040
1041	0	4	11	1	7	6	2	9	18	12	8	5	3	17	10	21	16	22	27	15	14	13	24	19	23	29	25	28	20	26	1041
1042	0	3	11	2	8	6	1	10	18	12	7	5	4	17	9	22	16	21	27	15	13	14	24	20	23	29	26	28	19	25	1042
1043	0	3	11	2	8	6	1	10	18	13	7	5	4	17	9	22	16	20	27	15	12	14	24	21	23	28	26	29	19	25	1043
1044	0	4	11	1	7	6	2	9	18	14	8	5	3	17	10	21	15	20	28	16	12	13	23	22	24	27	25	29	19	26	1044
1045	1	5	11	0	7	6	2	9	18	14	8	4	3	17	10	20	15	21	28	16	13	12	23	22	24	27	25	29	19	26	1045
1046	2	5	11	0	7	6	1	10	18	13	8	4	3	17	9	20	16	22	27	15	14	12	24	21	23	28	26	29	19	25	1046
1047	2	4	11	0	6	7	1	10	19	12	8	5	3	17	9	21	16	23	27	14	15	13	24	20	22	28	26	29	18	25	1047
1048	1	4	11	0	6	7	2	9	19	12	8	5	3	17	10	21	16	23	27	14	15	13	24	20	22	28	25	29	18	26	1048
1049	1	5	11	0	7	6	2	8	18	13	9	4	3	17	10	20	16	22	27	15	14	12	24	21	23	28	25	29	19	26	1049
1050	1	5	11	0	7	6	2	8	18	14	9	4	3	17	10	20	15	22	27	16	13	12	24	21	23	28	26	29	19	25	1050
1051	1	4	11	0	7	6	2	9	19	15	8	5	3	16	10	21	14	23	26	17	12	13	24	20	22	28	27	29	18	25	1051
1052	1	4	11	0	7	6	2	9	19	15	8	5	3	16	10	21	14	23	26	17	12	13	24	20	22	28	27	29	18	25	1052
1053	1	5	11	0	7	6	2	9	19	14	8	4	3	16	10	20	15	22	27	17	13	12	24	21	23	28	26	29	18	25	1053
1054	2	5	11	0	7	6	1	10	19	13	8	4	3	16	9	20	15	21	27	17	14	12	24	22	23	28	25	29	18	26	1054
1055	2	4	11	0	7	6	1	10	19	12	9	5	3	16	8	20	14	21	26	17	15	13	24	22	23	28	25	29	18	27	1055
1056	1	4	11	0	7	6	2	9	19	12	10	5	3	16	8	20	13	22	26	17	15	14	24	21	23	28	25	29	18	27	1056
1057	0	5	10	1	7	6	2	8	19	13	11	4	3	16	9	21	12	23	27	17	14	15	24	20	22	28	25	29	18	26	1057
1058	0	5	10	1	7	6	2	8	19	13	11	4	3	16	9	21	12	23	27	17	14	15	24	20	22	28	25	29	18	26	1058
1059	1	4	11	0	7	6	2	8	18	12	10	5	3	16	9	20	13	22	26	17	15	14	24	21	23	29	25	28	19	27	1059
1060	1	4	11	0	7	6	2	8	18	12	10	5	3	16	9	20	14	22	26	17	15	13	24	21	23	29	25	28	19	27	1060
1061	0	5	10	1	7	6	3	8	18	13	11	4	2	16	9	21	15	23	27	17	14	12	24	20	22	28	25	29	19	26	1061
1062	0	5	10	1	7	6	3	8	18	13	11	4	2	16	9	21	15	23	27	17	14	12	24	20	22	28	25	29	19	26	1062
1063	1	4	10	0	7	6	2	8	18	12	11	5	3	16	9	20	15	22	27	17	14	13	24	21	23	28	25	29	19	26	1063
1064	1	4	9	0	7	6	2	8	18	12	11	5	3	15	10	20	16	21	27	17	13	14	24	22	23	28	25	29	19	26	1064
1065	1	4	9	0	7	6	2	8	18	12	11	5	3	15	10	20	16	21	26	17	13	14	24	22	23	29	25	28	19	27	1065
1066	1	4	10	0	7	6	2	8	18	12	11	5	3	16	9	20	15	22	26	17	13	14	24	21	23	29	25	28	19	27	1066
1067	1	4	10	0	7	6	2	8	18	13	11	5	3	16	9	20	14	22	27	17	12	15	24	21	23	29	25	28	19	26	1067
1068	1	4	9	0	7	6	2	8	18	13	11	5	3	16	10	20	14	22	27	17	12	15	24	21	23	29	25	28	19	26	1068
1069	1	4	9	0	7	6	2	8	18	12	11	5	3	16	10	20	15	22	26	17	13	14	24	21	23	29	25	28	19	27	1069
1070	1	4	9	0	7	6	2	8	18	12	11	5	3	16	10	20	15	22	26	17	13	14	23	21	24	29	25	28	19	27	1070
1071	1	4	9	0	7	6	2	8	18	12	11	5	3	16	10	21	15	22	26	17	13	14	23	20	24	28	25	29	19	27	1071
1072	1	4	9	0	7	6	2	8	18	12	11	5	3	15	10	21	16	22	26	17	14	13	23	20	24	28	25	29	19	27	1072
1073	0	5	9	1	6	7	2	8	18	13	10	4	3	14	11	20	16	23	27	17	15	12	22	21	24	29	25	28	19	26	1073
1074	0	5	9	1	6	7	2	8	18	13	10	4	3	14	11	20	16	23	27	17	15	12	22	21	24	29	25	28	19	26	1074
1075	0	4	9	1	7	6	2	8	19	12	10	5	3	15	11	20	16	22	26	17	14	13	23	21	24	28	25	29	18	27	1075
1076	0	4	10	1	7	6	2	8	19	12	9	5	3	16	11	20	15	22	26	17	14	13	23	21	24	28	25	29	18	27	1076
1077	1	4	10	0	6	7	3	8	19	12	9	5	2	16	11	20	14	23	26	17	15	13	22	21	24	28	25	29	18	27	1077
1078	1	4	10	0	6	7	3	8	19	12	9	5	2	15	11	20	13	24	26	17	16	14	22	21	23	28	25	29	18	27	1078
1079	1	4	10	0	7	6	3	8	19	12	9	5	2	15	11	20	13	24	26	17	16	14	22	21	23	29	25	28	18	27	1079
1080	1	4	10	0	7	6	3	8	19	12	9	5	2	16	11	20	14	23	26	17	15	13	22	21	24	29	25	28	18	27	1080
1081	1	4	10	0	7	6	3	8	19	12	9	5	2	16	11	20	14	23	26	17	15	13	22	21	24	28	25	29	18	27	1081
1082	2	4	9	0	8	5	3	7	20	11	10	6	1	15	12	19	13	24	25	18	16	14	21	22	23	27	26	29	17	28	1082
1083	2	5	9	0	8	4	3	7	20	11	10	6	1	15	12	19	13	24	25	18	16	14	21	22	23	27	26	29	17	28	1083
1084	1	5	10	0	7	4	3	8	19	12	9	6	2	16	11	20	14	24	25	17	15	13	22	21	23	28	26	29	18	27	1084
1085	0	4	11	1	7	5	2	9	19	13	8	6	3	17	10	21	15	24	25	16	14	12	23	20	22	29	27	28	18	26	1085
1086	0	4	11	1	7	6	2	9	19	13	8	5	3	17	10	21	15	24	25	16	14	12	23	20	22	29	27	28	18	26	1086
1087	1	5	10	0	7	6	3	8	19	12	9	4	2	16	11	20	14	24	25	17	15	13	22	21	23	28	26	29	18	27	1087
1088	1	6	10	0	7	5	3	8	19	11	9	4	2	16	12	20	13	24	26	18	15	14	22	21	23	28	25	29	17	27	1088
1089	1	6	10	0	7	5	3	8	19	11	9	4	2	16	12	21	13	24	26	18	15	14	22	20	23	28	25	29	17	27	1089
1090	1	5	10	0	7	6	3	8	19	11	9	4	2	16	12	21	14	24	25	17	15	13	22	20	23	28	26	29	18	27	1090
1091	1	5	10	0	7	6	2	8	19	11	9	4	3	17	12	20	15	24	25	16	14	13	23	21	22	29	26	28	18	27	1091
1092	1	6	10	0	7	5	2	8	19	11	9	4	3	17	12	20	15	24	26	16	13	14	23	21	22	29	25	28	18	27	1092
1093	1	6	10	0	7	5	2	8	19	11	9	4	3	16	12	20	15	24	26	17	13	14	22	21	23	28	25	29	18	27	1093
1094	1	5	10	0	7	6	2	8	19	11	9	4	3	16	12	20	15	24	25	17	14	13	22	21	23	28	26	29	18	27	1094
1095	1	4	10	0	7	6	2	8	19	11	9	5	3	16	12	20	15	24	25	17	14	13	22	21	23	29	26	28	18	27	1095
1096	1	4	10	0	7	6	2	8	19	11	9	5	3	16	12	20	15	24	26	17	14	13	22	21	23	29	25	28	18	27	1096
1097	1	5	10	0	7	6	2	8	19	11	9	4	3	16	12	21	14	24	26	17	15	13	23	20	22	29	25	28	18	27	1097
1098	1	6	10	0	7	5	2	8	19	11	9	4	3	16	12	21	13	24	25	18	15	14	23	20	22	29	26	28	17	27	1098
1099	1	6	10	0	7	4	2	8	19	11	9	5	3	16	12	20	13	24	25	18	15	14	22	21	23	28	27	29	17	26	1099
1100	1	5	10	0	7	4	2	8	19	11	9	6	3	16	12	20	14	23	25	18	15	13	22	21	24	28	27	29	17	26	1100
1101	1	4	10	0	7	5	2	8	19	11	9	6	3	16	12	20	14	23	25	18	15	13	22	21	24	28	26	29	17	27	1101
1102	1	4	10	0	7	6	2	8	19	11	9	5	3	16	12	20	14	23	26	17	15	13	22	21	24	28	25	29	18	27	1102
1103	1	5	10	0	7	6	2	8	19	11	9	4	3	16	12	20	15	23	26	17	14	13	22	21	24	29	25	28	18	27	1103
1104	1	6	10	0	7	5	2	8	19	11	9	4	3	16	12	20	15	24	25	17	13	14	22	21	23	29	26	28	18	27	1104
1105	1	6	10	0	7	5	2	8	19	11	9	4	3	16	12	20	15	24	25	17	13	14	22	21	23	28	26	29	18	27	1105
1106	1	6	10	0	7	5	2	8	19	11	9	4	3	16	12	20	15	23	25	17	14	13	22	21	24	28	26	29	18	27	1106
1107	1	6	11	0	7	5	2	8	19	10	9	4	3	16	12	20	14	23	25	17	15	13	22	21	24	28	26	29	18	27	1107
1108	1	6	11	0	8	5	2	7	19	10	9	4	3	16	12	20	14	23	25	18	15	13	22	21	24	28	26	29	17	27	1108
1109	1	6	10	0	8	5	2	7	19	11	9	4	3	16	12	20	15	23	25	18	14	13	22	21	24	29	26	28	17	27	1109
1110	1	6	10	0	8	5	2	7	19	11	9	4	3	16	12	20	15	23	26	17	14	13	22	21	24	29	25	28	18	27	1110
1111	0	7	11	1	8	4	2	6	19	10	9	5	3	16	13	20	14	22	27	17	15	12	23	21	24	28	25	29	18	26	1111
1112	0	7	11	1	8	4	2	6	19	10	9	5	3	16	13	20	14	22	27	18	15	12	23	21	24	28	25	29	17	26	1112
1113	1	6	10	0	8	5	2	7	19	11	9	4	3	16	12	20	15	23	26	18	14	13	22	21	24	29	25	28	17	27	1113
1114	1	6	10	0	8	5	2	7	19	11	9	4	3	16	12	20	15	23	26	18	14	13	21	22	24	29	25	28	17	27	1114
1115	1	6	11	0	8	5	2	7	19	10	9	4	3	16	12	20	15	23	26	18	14	13	21	22	24	28	25	29	17	27	1115
1116	1	6	11	0	8	5	2	7	19	10	9	4	3	16	12	20	15	23	26	18	14	13	21	22	24	28	25	29	17	27	1116
1117	1	6	11	0	8	5	2	7	19	10	9	4	3	16	12	20	15	23	26	18	14	13	21	22	24	29	25	28	17	27	1117
1118	1	6	11	0	7	5	2	8	19	10	9	4	3	16	12	20	15	23	26	17	13	14	21	22	24	29	25	28	18	27	1118
1119	0	6	11	1	7	5	2	8	19	10	9	4	3	16	12	21	15	22	26	17	13	14	20	23	24	29	25	28	18	27	1119
1120	0	6	11	1	8	5	2	7	19	9	10	4	3	16	12	22	15	21	26	17	14	13	20	23	24	29	25	28	18	27	1120
1121	1	6	11	0	8	4	2	7	19	9	10	5	3	16	13	23	15	21	26	17	14	12	20	22	24	29	25	28	18	27	1121
1122	1	6	11	0	7	4	2	8	19	9	10	5	3	16	13	23	15	22	26	17	14	12	20	21	24	29	25	28	18	27	1122
1123	1	6	11	0	7	5	2	8	19	9	10	4	3	16	12	22	15	23	26	17	14	13	20	21	24	29	25	28	18	27	1123
1124	1	6	11	0	7	5	2	8	20	9	10	4	3	16	12	22	15	23	26	18	14	13	19	21	24	29	25	28	17	27	1124
1125	0	7	11	1	6	4	2	9	20	8	10	5	3	16	13	23	15	22	26	18	14	12	19	21	24	29	25	28	17	27	1125
1126	0	7	11	1	6	4	2	9	19	8	10	5	3	15	13	23	16	21	25	18	14	12	20	22	24	29	26	28	17	27	1126
1127	1	6	11	0	7	5	2	8	19	9	10	4	3	15	12	22	16	21	25	18	14	13	20	23	24	29	26	28	17	27	1127
1128	2	5	12	0	8	6	1	7	20	10	9	4	3	16	11	21	15	22	26	17	13	14	19	24	23	29	25	27	18	28	1128
1129	2	5	12	0	8	6	1	7	20	10	9	4	3	16	11	21	15	22	26	17	13	14	19	24	23	29	25	27	18	28	1129
1130	1	6	11	0	7	5	2	8	19	9	10	4	3	15	12	22	16	21	26	18	14	13	20	23	24	29	25	28	17	27	1130
1131	0	6	11	1	7	4	2	8	19	9	10	5	3	15	13	23	16	21	27	18	14	12	20	22	24	29	25	28	17	26	1131
1132	0	6	11	1	7	4	2	8	19	9	10	5	3	16	14	24	15	22	27	18	13	12	20	21	23	29	25	28	17	26	1132
1133	1	6	11	0	7	4	2	8	19	9	10	5	3	16	14	24	15	23	26	18	13	12	20	21	22	29	25	28	17	27	1133
1134	2	6	11	0	8	4	1	7	19	10	9	5	3	15	13	23	16	24	25	18	14	12	20	22	21	29	26	27	17	28	1134
1135	2	6	11	0	8	5	1	7	19	10	9	4	3	15	13	22	16	24	25	18	14	12	20	23	21	29	26	27	17	28	1135
1136	1	6	11	0	7	5	2	8	19	9	10	4	3	15	14	21	16	23	26	17	13	12	20	24	22	29	25	28	18	27	1136
1137	1	7	10	0	6	4	2	8	19	9	11	5	3	15	14	21	16	22	26	17	13	12	20	24	23	29	25	28	18	27	1137
1138	2	7	10	0	6	4	1	8	20	9	11	5	3	16	13	21	15	22	26	17	14	12	19	23	24	29	25	27	18	28	1138
1139	2	6	11	0	7	5	1	8	20	9	10	4	3	16	13	21	15	23	26	17	14	12	19	22	24	29	25	27	18	28	1139
1140	1	6	11	0	7	5	2	8	19	10	9	4	3	15	14	21	16	24	26	17	13	12	20	22	23	29	25	28	18	27	1140
1141	0	7	10	1	6	4	2	8	19	11	9	5	3	15	14	21	16	24	26	17	12	13	20	23	22	29	25	28	18	27	1141
1142	0	7	9	1	6	4	2	8	20	11	10	5	3	15	14	21	16	24	26	17	12	13	19	23	22	29	25	28	18	27	1142
1143	1	6	9	0	7	5	2	8	20	10	11	4	3	15	14	21	16	24	26	17	13	12	19	22	23	28	25	29	18	27	1143
1144	1	6	10	0	8	5	2	7	20	9	11	4	3	15	13	22	16	23	26	17	14	12	19	21	24	28	25	29	18	27	1144
1145	1	6	11	0	8	4	2	7	20	9	10	5	3	14	12	22	16	23	27	17	15	13	19	21	24	29	25	28	18	26	1145
1146	2	6	11	0	7	4	1	8	20	10	9	5	3	13	12	21	16	24	27	17	15	14	19	22	23	29	25	28	18	26	1146
1147	2	6	10	0	7	5	1	8	20	11	9	4	3	13	12	21	16	24	26	17	14	15	18	22	23	28	25	29	19	27	1147
1148	1	6	9	0	8	5	2	7	20	11	10	4	3	14	12	22	16	23	26	17	13	15	18	21	24	28	25	29	19	27	1148
1149	0	7	8	1	9	4	2	6	20	10	11	5	3	15	13	23	16	22	27	17	12	14	19	21	25	29	24	28	18	26	1149
1150	0	7	8	1	9	4	2	6	20	10	11	5	3	15	13	24	16	22	27	17	12	14	19	21	25	29	23	28	18	26	1150
1151	1	6	9	0	8	5	2	7	20	11	10	4	3	14	12	25	16	22	26	17	13	15	19	21	24	29	23	28	18	27	1151
1152	1	6	10	0	8	5	2	7	20	11	9	4	3	14	12	25	16	22	26	17	13	15	19	21	23	29	24	28	18	27	1152
1153	1	7	11	0	8	4	2	6	20	10	9	5	3	15	13	25	16	23	26	17	12	14	19	21	22	28	24	29	18	27	1153
1154	1	7	11	0	8	4	2	6	20	10	9	5	3	15	13	25	16	23	26	17	12	14	19	21	22	28	24	29	18	27	1154
1155	1	6	10	0	8	5	2	7	20	11	9	4	3	15	12	25	16	23	27	17	13	14	19	21	22	29	24	28	18	26	1155
1156	2	6	10	0	8	5	1	7	19	11	9	4	3	15	12	25	16	24	27	17	13	14	20	22	21	29	23	28	18	26	1156
1157	2	6	10	0	8	4	1	7	19	11	9	5	3	15	13	25	16	24	26	17	12	14	20	22	21	29	23	28	18	27	1157
1158	1	6	9	0	8	3	2	7	20	11	10	5	4	16	13	25	15	23	26	18	12	14	19	21	22	29	24	28	17	27	1158
1159	1	6	9	0	8	3	2	7	20	11	10	5	4	16	13	25	15	23	27	18	12	14	19	21	22	29	24	28	17	26	1159
1160	1	6	10	0	8	4	2	7	20	11	9	5	3	15	13	25	16	23	27	18	12	14	19	21	22	29	24	28	17	26	1160
1161	0	7	11	1	9	5	2	6	21	10	8	4	3	14	12	24	16	22	26	18	13	15	19	20	23	28	25	29	17	27	1161
1162	0	7	11	2	9	5	1	6	21	10	8	4	3	14	12	24	16	22	26	18	13	15	20	19	23	28	25	29	17	27	1162
1163	1	7	11	2	8	4	0	6	20	10	9	5	3	15	12	25	16	22	27	18	13	14	21	19	23	28	24	29	17	26	1163
1164	2	7	11	1	8	4	0	6	19	10	9	5	3	16	12	25	15	22	27	18	13	14	21	20	23	28	24	29	17	26	1164
1165	2	6	10	0	8	4	1	7	19	11	9	5	3	16	13	24	15	22	27	18	12	14	20	21	23	28	25	29	17	26	1165
1166	1	6	10	0	8	4	2	7	20	11	9	5	3	16	13	24	15	22	27	18	12	14	19	21	23	28	25	29	17	26	1166
1167	0	7	11	1	8	4	2	6	21	10	9	5	3	16	12	24	14	22	26	18	13	15	19	20	23	28	25	29	17	27	1167
1168	0	7	11	1	8	4	2	6	21	10	9	5	3	16	12	24	14	22	26	18	13	15	19	20	23	28	25	29	17	27	1168
1169	1	7	11	0	8	4	2	6	21	10	9	5	3	16	13	25	15	22	26	18	12	14	19	20	23	28	24	29	17	27	1169
1170	1	7	11	0	8	4	2	6	21	10	9	5	3	16	13	25	15	22	26	18	12	14	19	20	23	28	24	29	17	27	1170
1171	1	7	10	0	8	4	2	6	21	11	9	5	3	16	13	24	14	22	27	18	12	15	19	20	23	28	25	29	17	26	1171
1172	2	8	10	0	7	4	1	6	21	11	9	5	3	16	13	23	14	22	27	18	12	15	19	20	24	28	25	29	17	26	1172
1173	2	8	11	0	7	5	1	6	21	10	9	4	3	16	12	22	15	23	26	18	13	14	19	20	25	28	24	29	17	27	1173
1174	1	7	11	0	8	5	2	6	21	10	9	4	3	15	12	22	16	23	26	18	13	14	19	20	25	28	24	29	17	27	1174
1175	1	7	10	0	8	4	2	6	21	11	9	5	3	15	13	23	16	22	27	18	12	14	19	20	25	28	24	29	17	26	1175
1176	1	7	10	0	8	4	2	6	21	11	9	5	3	16	13	23	15	22	27	18	12	14	19	20	25	28	24	29	17	26	1176
1177	1	7	10	0	8	4	2	6	21	11	9	5	3	16	13	22	15	23	26	18	12	14	19	20	25	28	24	29	17	27	1177
1178	1	7	10	0	8	4	2	6	21	11	9	5	3	16	13	22	15	24	26	18	12	14	19	20	25	28	23	29	17	27	1178
1179	1	7	11	0	8	5	2	6	20	10	9	4	3	16	13	23	14	25	27	18	12	15	19	21	24	28	22	29	17	26	1179
1180	1	8	11	0	7	5	2	6	20	10	9	4	3	16	13	23	14	25	27	18	12	15	19	21	24	28	22	29	17	26	1180
1181	1	8	10	0	7	4	2	6	21	11	9	5	3	16	13	22	14	24	26	18	12	15	19	20	25	29	23	28	17	27	1181
1182	1	7	10	0	8	4	2	6	21	11	9	5	3	16	13	22	14	23	26	18	12	15	19	20	25	29	24	28	17	27	1182
1183	0	7	11	1	8	5	2	6	20	10	9	4	3	17	12	23	15	22	27	18	13	14	19	21	25	29	24	28	16	26	1183
1184	0	7	11	1	8	5	2	6	20	10	9	4	3	17	12	23	15	22	27	18	13	14	19	21	25	29	24	28	16	26	1184
1185	1	7	10	0	8	4	2	6	20	11	9	5	3	16	13	22	14	23	26	18	12	15	19	21	25	29	24	28	17	27	1185
1186	1	7	10	0	8	4	2	6	20	11	9	5	3	16	13	22	14	23	26	18	12	15	19	21	25	29	24	28	17	27	1186
1187	1	7	10	0	8	5	2	6	20	11	9	4	3	16	12	23	15	22	26	18	13	14	19	21	25	29	24	28	17	27	1187
1188	1	7	10	0	8	5	2	6	20	11	9	4	3	16	12	24	15	22	26	18	13	14	19	21	25	29	23	28	17	27	1188
1189	1	7	10	0	8	4	2	6	20	11	9	5	3	16	12	24	15	22	26	18	13	14	19	21	25	28	23	29	17	27	1189
1190	1	7	10	0	8	4	2	6	19	11	9	5	3	16	12	24	15	22	26	18	13	14	20	21	25	28	23	29	17	27	1190
1191	1	7	10	0	8	4	2	6	19	11	9	5	3	16	12	24	14	22	26	18	13	15	20	21	25	29	23	28	17	27	1191
1192	1	7	10	0	8	4	2	6	19	11	9	5	3	16	12	24	13	22	26	18	14	15	20	21	25	29	23	28	17	27	1192
1193	1	6	11	0	8	4	2	7	19	10	9	5	3	16	13	24	12	23	26	18	15	14	20	21	25	29	22	28	17	27	1193
1194	1	6	11	0	8	4	2	7	19	10	9	5	3	16	13	23	12	24	26	18	15	14	20	21	25	29	22	28	17	27	1194
1195	1	7	10	0	8	4	2	6	19	11	9	5	3	16	12	23	13	24	26	18	14	15	20	21	25	29	22	28	17	27	1195
1196	2	7	10	0	8	4	1	6	19	11	9	5	3	16	12	24	14	23	26	18	13	15	20	21	25	29	22	28	17	27	1196
1197	2	7	11	0	8	4	1	6	19	10	9	5	3	17	12	24	15	23	27	18	13	14	20	21	25	29	22	28	16	26	1197
1198	1	8	12	0	7	3	2	5	20	9	10	6	4	18	11	23	15	24	28	17	14	13	19	22	26	29	21	27	16	25	1198
1199	1	8	12	0	7	3	2	5	20	9	10	6	4	18	11	23	14	24	28	17	15	13	19	22	26	29	21	27	16	25	1199
1200	2	7	11	0	8	4	1	6	19	10	9	5	3	17	12	24	13	23	27	18	15	14	20	21	25	29	22	28	16	26	1200
1201	2	7	10	1	9	5	0	6	19	11	8	4	3	16	13	25	12	22	26	18	14	15	21	20	24	29	23	28	17	27	1201
1202	2	8	10	1	9	5	0	6	19	11	7	4	3	16	13	25	12	22	26	18	14	15	21	20	24	29	23	28	17	27	1202
1203	2	9	11	0	8	4	1	6	19	10	7	5	3	16	12	24	13	22	27	18	15	14	20	21	25	29	23	28	17	26	1203
1204	1	9	12	0	7	3	2	6	20	10	8	5	4	16	11	24	14	21	27	18	15	13	19	22	26	29	23	28	17	25	1204
1205	0	8	12	1	7	3	2	6	20	10	9	5	4	16	11	24	15	21	26	18	14	13	19	23	27	29	22	28	17	25	1205
1206	0	7	12	1	8	4	2	6	20	10	9	5	3	16	11	24	15	22	25	18	14	13	19	23	27	29	21	28	17	26	1206
1207	1	7	12	0	9	4	2	6	20	10	8	5	3	16	11	24	14	23	25	18	15	13	19	22	26	29	21	28	17	27	1207
1208	1	7	11	0	9	4	2	6	19	10	8	5	3	16	12	24	13	23	26	18	15	14	20	21	25	29	22	28	17	27	1208
1209	1	7	11	0	8	4	2	6	19	10	9	5	3	17	12	24	13	22	27	18	15	14	20	21	25	29	23	28	16	26	1209
1210	1	7	11	0	8	3	2	5	20	10	9	6	4	17	12	24	14	21	27	18	15	13	19	22	25	29	23	28	16	26	1210
1211	0	7	11	1	9	3	2	5	20	10	8	6	4	16	12	25	14	21	26	18	15	13	19	23	24	29	22	28	17	27	1211
1212	0	7	12	1	9	4	2	6	20	10	8	5	3	16	11	25	13	21	26	18	15	14	19	23	24	29	22	28	17	27	1212
1213	1	7	12	0	8	4	2	6	20	10	9	5	3	17	11	24	13	21	27	18	15	14	19	22	25	29	23	28	16	26	1213
1214	1	8	12	0	7	3	2	5	19	10	9	6	4	17	11	24	14	22	27	18	15	13	20	21	25	29	23	28	16	26	1214
1215	1	8	12	0	7	3	2	5	19	10	9	6	4	16	11	24	14	23	26	18	15	13	20	21	25	28	22	29	17	27	1215
1216	1	7	12	0	8	4	2	6	20	10	9	5	3	16	11	23	13	24	26	18	15	14	19	22	25	28	21	29	17	27	1216
1217	0	7	12	1	8	4	2	6	20	11	9	5	3	16	10	22	13	24	27	18	15	14	19	23	25	29	21	28	17	26	1217
1218	0	8	12	2	7	3	1	6	20	11	10	5	4	15	9	21	14	23	27	17	16	13	19	24	25	29	22	28	18	26	1218
1219	1	8	13	2	6	3	0	7	20	10	11	4	5	15	9	21	14	22	26	17	16	12	19	24	25	28	23	29	18	27	1219
1220	2	8	13	1	6	4	0	7	20	10	11	3	5	16	9	22	14	21	26	18	15	12	19	23	25	28	24	29	17	27	1220
1221	2	8	12	0	7	5	1	6	20	11	10	3	4	16	9	23	14	21	26	18	15	13	19	22	25	29	24	28	17	27	1221
1222	1	7	12	0	8	5	2	6	20	11	9	3	4	16	10	24	13	22	26	18	15	14	19	21	25	29	23	28	17	27	1222
1223	0	6	12	1	8	4	2	7	20	11	9	3	5	16	10	25	13	23	27	18	15	14	19	21	24	28	22	29	17	26	1223
1224	0	6	12	1	8	3	2	7	20	11	9	4	5	16	10	25	13	23	27	18	15	14	19	21	24	28	22	29	17	26	1224
1225	1	7	12	0	8	3	2	6	20	11	9	4	5	16	10	25	13	22	26	18	15	14	19	21	24	29	23	28	17	27	1225
1226	1	8	12	0	7	4	2	6	20	11	9	3	5	15	10	25	13	21	26	18	16	14	19	22	24	29	23	28	17	27	1226
1227	0	8	12	1	7	5	2	6	20	11	9	3	4	15	10	24	13	21	27	18	16	14	19	23	25	28	22	29	17	26	1227
1228	0	7	12	1	8	5	2	6	20	11	9	3	4	15	10	24	14	22	27	18	16	13	19	23	25	28	21	29	17	26	1228
1229	1	7	12	0	8	4	2	6	20	11	9	3	5	15	10	24	14	22	27	18	16	13	19	23	25	29	21	28	17	26	1229
1230	1	8	11	0	7	4	2	6	20	12	9	3	5	15	10	23	13	21	27	18	16	14	19	24	25	29	22	28	17	26	1230
1231	0	9	11	1	7	5	2	6	20	12	8	3	4	15	10	23	13	21	26	19	17	14	18	24	25	28	22	29	16	27	1231
1232	0	9	11	1	7	5	2	6	20	12	8	3	4	15	10	24	14	22	26	19	17	13	18	23	25	28	21	29	16	27	1232
1233	1	8	11	0	7	4	2	6	20	12	9	3	5	15	10	24	14	22	26	19	16	13	18	23	25	29	21	28	17	27	1233
1234	2	7	12	0	8	3	1	5	19	11	9	4	6	16	10	23	13	21	26	20	15	14	18	24	25	29	22	27	17	28	1234
1235	2	7	12	0	8	3	1	5	19	11	9	4	6	16	10	23	13	21	26	20	15	14	18	24	25	29	22	27	17	28	1235
1236	1	8	11	0	7	4	2	6	20	12	10	3	5	15	9	24	14	22	25	19	16	13	18	23	26	29	21	28	17	27	1236
1237	0	8	11	1	7	4	2	6	20	12	10	3	5	15	9	24	14	23	25	18	16	13	19	22	26	29	21	28	17	27	1237
1238	0	8	11	1	7	3	2	5	20	12	9	4	6	16	10	23	13	24	26	18	15	14	19	22	25	29	21	28	17	27	1238
1239	1	9	10	0	7	3	2	5	20	13	8	4	6	16	11	22	12	24	27	19	15	14	18	23	25	28	21	29	17	26	1239
1240	1	9	10	0	8	4	2	6	20	13	7	3	5	16	11	22	12	23	27	19	15	14	18	24	25	28	21	29	17	26	1240
1241	0	9	11	1	8	4	2	6	20	12	7	3	5	16	10	22	13	23	26	19	15	14	18	24	25	29	21	28	17	27	1241
1242	0	10	12	1	7	3	2	5	20	11	8	4	6	15	9	21	14	24	26	19	16	13	17	23	25	29	22	28	18	27	1242
1243	0	10	12	1	7	3	2	5	20	11	8	4	6	15	9	21	14	24	27	19	16	13	17	23	25	28	22	29	18	26	1243
1244	0	9	11	1	8	4	2	5	20	12	7	3	6	16	10	22	13	24	27	19	15	14	18	23	25	28	21	29	17	26	1244
1245	0	9	11	1	8	4	2	5	20	12	7	3	6	16	10	22	13	24	26	19	15	14	18	23	25	29	21	28	17	27	1245
1246	0	10	12	2	7	3	1	6	19	11	8	4	5	15	9	21	14	23	25	20	16	13	18	24	26	29	22	28	17	27	1246
1247	0	10	12	2	7	3	1	6	19	11	8	4	5	15	9	21	14	23	25	20	16	13	18	24	26	29	22	28	17	27	1247
1248	0	9	11	1	8	4	2	5	20	12	7	3	6	15	10	22	13	24	26	19	16	14	18	23	25	29	21	28	17	27	1248
1249	1	9	11	0	8	4	2	5	20	12	7	3	6	15	10	22	13	24	26	19	16	14	18	23	25	29	21	28	17	27	1249
1250	2	10	12	0	7	3	1	6	19	11	8	4	5	15	9	21	14	23	25	20	16	13	17	24	26	29	22	27	18	28	1250
1251	2	10	12	0	7	3	1	6	19	11	8	4	5	15	9	21	14	23	25	20	16	13	17	24	26	29	22	27	18	28	1251
1252	1	9	11	0	7	3	2	5	20	12	8	4	6	15	10	22	13	23	26	19	16	14	17	24	25	29	21	28	18	27	1252
1253	0	9	11	1	7	3	2	5	20	12	8	4	6	15	10	22	13	23	26	19	16	14	17	24	25	29	21	28	18	27	1253
1254	0	10	12	1	8	4	2	5	19	11	7	3	6	15	9	21	13	23	26	20	16	14	17	24	25	29	22	28	18	27	1254
1255	1	10	12	0	8	4	2	5	19	11	7	3	6	15	9	21	13	23	26	20	17	14	16	24	25	29	22	28	18	27	1255
1256	1	9	11	0	7	3	2	5	19	12	8	4	6	15	10	22	13	24	26	20	18	14	16	23	25	29	21	28	17	27	1256
1257	0	9	10	1	7	3	2	4	19	13	8	5	6	15	11	22	12	24	26	21	18	14	17	23	25	29	20	28	16	27	1257
1258	0	9	10	1	8	3	2	4	19	13	7	5	6	15	11	22	12	23	26	21	17	14	18	24	25	29	20	28	16	27	1258
1259	1	9	11	0	8	3	2	5	19	12	7	4	6	15	10	22	13	23	27	20	16	14	18	25	24	29	21	28	17	26	1259
1260	1	10	11	0	7	4	2	5	19	12	8	3	6	16	9	22	13	23	27	20	15	14	17	25	24	29	21	28	18	26	1260
1261	1	10	11	0	7	5	2	4	19	12	8	3	6	16	9	22	13	23	26	20	15	14	17	24	25	29	21	28	18	27	1261
1262	1	10	11	0	7	5	2	4	19	12	8	3	6	15	9	22	13	24	26	20	16	14	17	23	25	29	21	27	18	28	1262
1263	0	10	11	1	7	4	2	5	19	13	8	3	6	15	9	22	12	24	26	21	16	14	17	23	25	29	20	27	18	28	1263
1264	0	10	12	1	7	4	2	5	19	13	8	3	6	16	9	22	11	23	26	21	15	14	17	24	25	29	20	28	18	27	1264
1265	1	10	12	0	7	5	2	4	19	13	8	3	6	16	9	23	11	22	27	20	15	14	17	24	25	29	21	28	18	26	1265
1266	1	9	11	0	7	5	2	4	19	14	8	3	6	15	10	23	12	21	27	20	16	13	18	24	25	29	22	28	17	26	1266
1267	0	8	11	1	7	4	2	5	19	15	9	3	6	14	10	22	13	21	26	20	17	12	18	24	25	29	23	28	16	27	1267
1268	0	8	11	1	7	4	2	5	19	15	9	3	6	14	10	21	13	22	25	20	17	12	18	24	26	29	23	28	16	27	1268
1269	1	9	11	0	7	5	2	4	19	14	8	3	6	15	10	21	12	23	25	20	16	13	18	24	27	29	22	28	17	26	1269
1270	1	10	11	0	7	5	2	4	19	14	8	3	6	15	9	22	12	23	25	20	16	13	17	24	27	29	21	28	18	26	1270
1271	0	10	11	1	7	4	2	5	19	14	8	3	6	15	9	22	13	23	25	20	16	12	17	24	26	28	21	29	18	27	1271
1272	0	9	11	1	7	4	2	5	19	14	8	3	6	15	10	21	13	24	26	20	16	12	17	23	25	28	22	29	18	27	1272
1273	0	9	11	1	7	5	2	4	19	14	8	3	6	15	10	21	13	24	26	20	16	12	17	23	25	29	22	28	18	27	1273
1274	0	9	11	1	7	5	2	4	19	14	8	3	6	16	10	21	13	24	26	20	15	12	17	23	25	29	22	28	18	27	1274
1275	1	8	10	0	7	4	2	5	19	15	9	3	6	17	11	20	12	25	27	21	14	13	16	22	24	29	23	28	18	26	1275
1276	1	8	10	0	7	3	2	5	19	15	9	4	6	18	11	20	12	25	27	21	14	13	16	22	24	29	23	28	17	26	1276
1277	0	9	11	1	7	3	2	4	19	14	8	5	6	18	10	21	13	24	26	20	15	12	17	23	25	29	22	28	16	27	1277
1278	0	10	12	2	8	4	1	3	20	14	7	6	5	17	9	22	13	23	25	19	15	11	18	24	26	29	21	27	16	28	1278
1279	0	10	13	2	8	4	1	3	21	15	7	6	5	16	9	23	12	22	25	19	14	11	18	24	27	29	20	26	17	28	1279
1280	0	9	13	1	7	3	2	4	21	15	8	5	6	16	10	23	11	22	25	19	14	12	18	24	27	29	20	26	17	28	1280
1281	0	9	12	1	7	3	2	5	20	15	8	4	6	17	10	22	11	23	25	19	14	13	18	24	26	29	21	27	16	28	1281
1282	0	10	12	1	7	3	2	5	19	15	8	4	6	18	9	22	11	23	26	20	14	13	17	24	25	29	21	27	16	28	1282
1283	0	10	12	1	7	3	2	4	19	15	8	5	6	18	9	22	11	23	26	20	14	13	17	24	25	29	21	27	16	28	1283
1284	0	10	12	1	7	3	2	4	19	15	8	5	6	17	9	21	11	23	26	20	14	13	18	24	25	29	22	28	16	27	1284
1285	0	10	12	1	7	3	2	5	19	14	8	4	6	17	9	21	11	23	26	20	15	13	18	24	25	29	22	28	16	27	1285
1286	0	10	12	1	7	3	2	5	19	14	8	4	6	17	9	22	11	24	25	20	15	13	18	23	26	29	21	28	16	27	1286
1287	0	10	12	1	7	3	2	4	19	14	9	5	6	16	8	22	11	24	25	20	15	13	18	23	26	29	21	28	17	27	1287
1288	0	10	12	1	7	3	2	4	19	14	9	5	6	16	8	21	11	24	26	20	15	13	18	23	25	29	22	28	17	27	1288
1289	1	10	13	0	7	3	2	5	19	15	8	4	6	17	9	21	11	24	26	20	14	12	18	22	25	29	23	28	16	27	1289
1290	1	10	13	0	7	3	2	5	19	15	8	4	6	17	9	21	11	24	26	20	14	12	18	22	25	29	23	27	16	28	1290
1291	0	10	12	1	7	3	2	4	19	14	9	5	6	17	8	21	11	24	26	20	15	13	18	23	25	29	22	27	16	28	1291
1292	0	9	12	1	7	3	2	4	19	14	10	5	6	17	8	22	11	24	26	20	15	13	18	23	25	29	21	27	16	28	1292
1293	0	9	12	1	7	3	2	4	19	15	10	5	6	17	8	22	11	24	27	20	14	13	18	23	25	29	21	26	16	28	1293
1294	0	10	12	1	7	4	2	3	19	15	9	6	5	17	8	21	11	23	27	20	14	13	18	24	26	29	22	25	16	28	1294
1295	0	10	12	1	7	4	2	3	19	14	8	6	5	17	9	21	11	23	27	20	15	13	18	24	26	28	22	25	16	29	1295
1296	0	9	11	1	7	3	2	4	20	13	8	5	6	18	10	22	12	24	27	19	16	14	17	23	25	28	21	26	15	29	1296
1297	1	9	11	0	7	3	2	4	20	13	8	5	6	18	10	23	12	24	26	19	16	14	17	22	25	29	21	27	15	28	1297
1298	1	10	12	0	7	3	2	4	19	14	8	5	6	17	9	23	11	24	26	20	15	13	18	22	25	29	21	28	16	27	1298
1299	0	10	12	1	7	3	2	4	19	15	8	5	6	17	9	23	11	24	26	20	14	13	18	22	25	29	21	28	16	27	1299
1300	0	9	11	1	7	4	2	3	19	16	8	6	5	18	10	24	12	23	25	20	14	13	17	21	26	29	22	27	15	28	1300
1301	1	9	11	0	7	4	2	3	19	16	8	6	5	18	10	24	12	22	25	20	15	13	17	21	27	29	23	26	14	28	1301
1302	1	10	12	0	7	3	2	4	19	15	8	5	6	17	9	24	11	22	26	20	16	13	18	21	27	29	23	25	14	28	1302
1303	0	10	12	1	7	3	2	4	19	14	8	5	6	17	9	24	11	23	27	20	16	13	18	21	26	29	22	25	15	28	1303
1304	0	9	12	1	7	3	2	4	19	14	8	5	6	18	10	23	11	24	27	20	16	13	17	21	25	29	22	26	15	28	1304
1305	0	9	12	1	7	3	2	4	19	14	8	5	6	18	10	22	11	24	26	20	16	13	17	21	25	29	23	27	15	28	1305
1306	0	10	12	1	7	3	2	4	19	14	8	6	5	18	9	21	11	23	25	20	16	13	17	22	26	29	24	27	15	28	1306
1307	0	10	12	1	7	3	2	4	19	15	9	6	5	18	8	21	11	23	25	20	17	13	16	22	26	29	24	27	14	28	1307
1308	0	10	11	1	7	3	2	4	19	15	9	5	6	17	8	22	12	24	26	20	18	13	16	21	25	29	23	28	14	27	1308
1309	0	11	10	1	7	2	3	5	19	14	8	4	6	16	9	22	12	24	26	20	18	13	17	21	25	29	23	28	15	27	1309
1310	0	11	10	1	7	2	3	6	19	14	8	4	5	16	9	22	12	24	26	20	18	13	17	21	25	29	23	28	15	27	1310
1311	0	11	10	1	7	2	3	6	19	15	8	4	5	17	9	22	12	24	26	20	18	13	16	21	25	29	23	28	14	27	1311
1312	0	11	10	1	7	2	3	6	19	15	8	4	5	17	9	22	12	24	25	20	18	13	16	21	26	29	23	28	14	27	1312
1313	1	10	11	0	7	2	3	6	19	15	8	5	4	17	9	22	12	24	25	21	18	13	16	20	26	29	23	28	14	27	1313
1314	1	10	11	0	7	2	3	6	19	15	8	5	4	18	9	22	12	24	26	21	17	13	16	20	25	29	23	28	14	27	1314
1315	0	11	10	1	7	3	2	6	19	14	8	4	5	18	9	23	12	24	27	20	17	13	16	21	25	29	22	28	15	26	1315
1316	0	11	10	1	7	3	2	5	20	14	8	4	6	18	9	23	12	24	27	19	17	13	16	21	26	29	22	28	15	25	1316
1317	1	10	11	0	7	2	3	5	21	15	8	4	6	18	9	22	12	24	26	19	17	13	16	20	27	29	23	28	14	25	1317
1318	1	10	11	0	7	2	3	5	21	16	8	4	6	18	9	22	12	24	25	19	17	13	15	20	27	29	23	28	14	26	1318
1319	0	11	10	1	7	3	2	5	20	16	9	4	6	18	8	23	13	24	25	19	17	12	14	21	26	29	22	28	15	27	1319
1320	0	11	10	1	7	3	2	6	19	16	9	4	5	18	8	23	13	24	26	20	17	12	14	21	25	29	22	28	15	27	1320
1321	0	10	11	1	7	3	2	6	19	16	8	4	5	18	9	22	12	24	27	21	17	13	14	20	25	29	23	28	15	26	1321
1322	0	10	11	1	7	3	2	6	20	15	8	4	5	18	9	22	12	24	27	21	17	13	14	19	26	29	23	28	16	25	1322
1323	1	10	11	0	7	3	2	6	20	15	8	4	5	18	9	23	12	24	27	21	17	13	14	19	26	28	22	29	16	25	1323
1324	1	9	11	0	7	4	2	5	19	16	8	3	6	17	10	24	12	23	27	22	18	14	13	20	25	28	21	29	15	26	1324
1325	0	9	11	1	7	4	2	5	19	16	8	3	6	17	10	24	12	23	27	22	18	14	13	20	25	29	21	28	15	26	1325
1326	0	10	11	1	7	3	2	5	20	15	8	4	6	17	9	23	12	24	27	21	18	13	14	19	26	29	22	28	16	25	1326
1327	1	11	10	0	7	3	2	5	20	15	8	4	6	17	9	22	12	24	27	21	18	13	14	19	26	28	23	29	16	25	1327
1328	1	11	10	0	7	3	2	5	20	15	8	4	6	17	9	22	12	24	27	21	18	13	14	19	26	28	23	29	16	25	1328
1329	0	10	11	1	7	3	2	4	20	14	8	5	6	17	9	23	12	24	27	21	18	13	15	19	26	29	22	28	16	25	1329
1330	0	10	11	1	7	3	2	4	20	14	8	5	6	17	9	24	12	23	27	21	18	13	15	19	26	29	22	28	16	25	1330
1331	1	11	10	0	7	3	2	5	20	15	8	4	6	16	9	24	12	22	26	21	18	13	14	19	27	28	23	29	17	25	1331
1332	1	12	9	0	8	4	2	6	19	16	7	3	5	15	10	23	11	21	25	22	18	14	13	20	27	28	24	29	17	26	1332
1333	0	12	9	1	8	4	2	6	19	17	7	3	5	14	11	22	10	21	25	23	18	15	13	20	26	28	24	29	16	27	1333
1334	0	12	10	1	7	3	2	5	20	17	8	4	6	13	11	21	9	22	26	23	18	15	14	19	25	28	24	29	16	27	1334
1335	1	12	11	0	7	3	2	4	20	16	8	5	6	13	10	21	9	23	27	22	18	14	15	19	25	28	24	29	17	26	1335
1336	1	12	11	0	8	3	2	4	20	16	7	5	6	14	9	22	10	24	28	21	18	13	15	19	26	27	23	29	17	25	1336
1337	0	12	10	1	8	3	2	5	20	16	7	4	6	14	9	22	11	24	28	21	18	13	15	19	26	27	23	29	17	25	1337
1338	0	12	10	1	7	3	2	6	20	15	8	4	5	14	9	21	11	23	27	22	18	13	16	19	25	28	24	29	17	26	1338
1339	1	13	11	0	7	3	2	6	20	14	8	4	5	15	9	21	10	22	27	23	18	12	17	19	25	29	24	28	16	26	1339
1340	1	13	11	0	8	3	2	5	19	14	7	4	6	15	9	22	10	21	28	23	18	12	17	20	26	29	24	27	16	25	1340
1341	0	12	10	1	8	3	2	5	19	15	7	4	6	14	9	23	11	21	28	22	18	13	17	20	26	29	24	27	16	25	1341
1342	0	12	10	1	8	3	2	5	20	15	7	4	6	14	9	23	11	21	27	22	18	13	17	19	26	29	24	28	16	25	1342
1343	1	12	10	0	8	3	2	5	20	14	7	4	6	15	9	22	11	21	27	23	18	13	17	19	26	28	24	29	16	25	1343
1344	1	11	9	0	7	3	2	6	20	13	8	4	5	15	10	21	12	22	28	24	18	14	17	19	25	27	23	29	16	26	1344
1345	0	11	9	1	7	3	2	6	20	13	8	4	5	15	10	21	12	23	29	24	18	14	16	19	25	27	22	28	17	26	1345
1346	0	12	10	1	8	3	2	5	20	14	7	4	6	15	9	22	11	24	29	23	18	13	16	19	26	27	21	28	17	25	1346
1347	0	13	11	1	8	3	2	5	20	15	7	4	6	14	9	23	10	24	29	22	18	12	16	19	26	27	21	28	17	25	1347
1348	0	13	11	1	8	3	2	6	20	15	7	4	5	14	9	24	10	23	29	21	18	12	16	19	26	27	22	28	17	25	1348
1349	0	13	11	1	8	3	2	6	20	15	7	4	5	14	9	24	10	23	28	21	18	12	16	19	26	27	22	29	17	25	1349
1350	0	13	11	1	8	3	2	5	20	15	7	4	6	14	9	23	10	24	28	22	18	12	16	19	26	27	21	29	17	25	1350
1351	0	13	11	1	8	3	2	5	20	15	7	4	6	14	9	23	10	24	29	22	18	12	16	19	26	27	21	28	17	25	1351
1352	0	13	11	1	8	3	2	5	20	15	7	4	6	14	9	24	10	23	29	21	18	12	16	19	26	28	22	27	17	25	1352
1353	0	13	10	1	8	3	2	5	20	15	7	4	6	14	9	24	11	23	29	21	18	12	16	19	26	28	22	27	17	25	1353
1354	0	13	9	1	8	3	2	6	19	15	7	4	5	14	10	23	11	24	29	22	17	12	16	20	26	27	21	28	18	25	1354
1355	0	12	9	1	8	3	2	6	19	14	7	4	5	15	10	22	11	25	29	23	17	13	16	20	26	27	21	28	18	24	1355
1356	0	12	10	1	8	3	2	5	20	14	7	4	6	15	9	21	11	25	29	23	17	13	16	19	26	28	22	27	18	24	1356
1357	0	13	11	1	8	3	2	4	20	15	7	5	6	14	9	21	10	24	29	22	16	12	17	19	26	28	23	27	18	25	1357
1358	0	13	11	1	8	3	2	4	20	15	7	5	6	14	9	22	10	23	29	21	16	12	17	19	26	28	24	27	18	25	1358
1359	0	13	10	1	8	3	2	5	20	14	7	4	6	15	9	22	11	23	29	21	17	12	16	19	26	28	24	27	18	25	1359
1360	0	14	9	1	7	3	2	6	20	13	8	4	5	15	10	21	11	24	29	22	17	12	16	19	26	27	23	28	18	25	1360
1361	1	15	8	0	7	2	3	6	21	12	9	5	4	14	11	20	10	25	29	23	16	13	17	18	27	26	22	28	19	24	1361
1362	1	15	8	0	7	2	3	6	21	12	9	5	4	14	11	20	10	25	29	23	16	13	17	18	27	26	22	28	19	24	1362
1363	0	14	9	1	7	3	2	6	20	13	8	4	5	15	10	21	11	24	28	23	17	12	16	19	26	27	22	29	18	25	1363
1364	0	13	10	1	8	4	2	5	20	14	7	3	6	16	9	22	11	23	28	24	17	12	15	19	25	27	21	29	18	26	1364
1365	1	12	11	0	9	5	2	4	21	15	6	3	7	17	8	23	10	22	29	25	16	13	14	18	24	26	20	28	19	27	1365
1366	1	12	11	0	9	5	2	4	21	15	6	3	7	17	8	23	10	22	29	25	16	13	14	18	24	26	20	28	19	27	1366
1367	0	13	10	1	8	4	2	5	20	14	7	3	6	16	9	22	11	23	29	24	17	12	15	19	25	27	21	28	18	26	1367
1368	0	13	9	1	8	3	2	6	20	14	7	4	5	16	10	21	11	24	29	23	17	12	15	19	26	27	22	28	18	25	1368
1369	0	12	9	1	8	3	2	6	20	14	7	4	5	17	10	21	11	24	28	23	16	13	15	19	26	27	22	29	18	25	1369
1370	0	12	10	1	8	4	2	5	20	14	7	3	6	17	9	22	11	24	28	23	16	13	15	19	26	27	21	29	18	25	1370
1371	1	13	11	0	8	5	2	4	20	15	7	3	6	16	9	23	10	24	29	22	17	12	14	18	27	26	21	28	19	25	1371
1372	1	13	11	0	7	5	2	3	20	15	8	4	6	16	10	23	9	24	29	21	17	12	14	18	27	26	22	28	19	25	1372
1373	0	12	10	1	7	5	2	3	20	14	8	4	6	16	11	23	9	25	28	21	17	13	15	19	26	27	22	29	18	24	1373
1374	0	12	9	1	8	5	2	4	20	13	7	3	6	16	11	23	10	25	28	22	17	14	15	19	26	27	21	29	18	24	1374
1375	1	12	9	0	8	4	2	5	20	13	7	3	6	17	10	22	11	24	28	23	16	15	14	19	27	26	21	29	18	25	1375
1376	1	12	10	0	7	3	2	6	19	14	8	4	5	17	9	21	11	24	28	23	16	15	13	20	27	25	22	29	18	26	1376
1377	0	12	10	1	7	3	2	6	19	14	8	4	5	16	9	21	11	24	29	22	17	15	13	20	27	25	23	28	18	26	1377
1378	0	12	10	1	7	3	2	6	19	13	8	4	5	16	9	22	11	24	29	21	17	15	14	20	27	26	23	28	18	25	1378
1379	0	12	10	1	7	2	3	6	19	13	8	4	5	17	9	23	11	25	28	21	16	14	15	20	26	27	22	29	18	24	1379
1380	0	12	9	1	8	2	3	5	20	14	7	4	6	17	10	23	11	25	27	22	16	13	15	19	26	28	21	29	18	24	1380
1381	0	12	9	1	8	3	2	5	20	14	7	4	6	16	10	23	11	24	27	22	17	13	15	19	26	28	21	29	18	25	1381
1382	0	12	10	2	7	3	1	6	19	13	8	4	5	16	9	23	11	24	28	21	17	14	15	20	25	27	22	29	18	26	1382
1383	0	12	10	2	7	3	1	6	19	13	8	4	5	16	9	23	11	24	28	21	17	14	15	20	25	27	22	29	18	26	1383
1384	0	12	9	1	7	3	2	5	19	13	8	4	6	16	10	23	11	24	28	22	17	14	15	20	26	27	21	29	18	25	1384
1385	0	12	9	1	7	3	2	5	19	13	8	4	6	16	11	23	10	24	28	22	17	14	15	20	27	26	21	29	18	25	1385
1386	0	12	9	2	7	3	1	6	19	14	8	4	5	16	11	23	10	24	28	21	17	13	15	20	27	26	22	29	18	25	1386
1387	0	13	9	2	7	3	1	6	19	15	8	4	5	17	10	22	11	24	28	21	16	12	14	20	26	27	23	29	18	25	1387
1388	0	13	10	1	7	3	2	5	19	15	8	4	6	18	9	22	11	24	27	21	16	12	14	20	25	28	23	29	17	26	1388
1389	0	12	10	1	7	3	2	5	19	14	8	4	6	18	9	23	11	24	27	20	17	13	15	21	25	28	22	29	16	26	1389
1390	0	12	9	1	7	3	2	5	19	13	8	4	6	17	10	23	11	24	28	20	18	14	15	22	26	27	21	29	16	25	1390
1391	0	12	9	1	7	3	2	5	19	13	8	4	6	16	10	23	11	24	28	20	18	15	14	22	27	26	21	29	17	25	1391
1392	0	12	9	1	7	3	2	5	19	13	8	4	6	16	10	23	11	24	28	20	18	15	14	21	27	26	22	29	17	25	1392
1393	0	12	9	1	7	3	2	5	19	13	8	4	6	17	10	23	11	24	28	21	18	14	15	20	26	27	22	29	16	25	1393
1394	0	11	10	2	8	4	1	6	20	14	7	3	5	18	9	24	12	23	27	22	17	13	16	19	25	28	21	29	15	26	1394
1395	0	11	10	2	8	4	1	6	20	14	7	3	5	18	9	24	12	23	27	22	17	13	16	19	25	28	21	29	15	26	1395
1396	0	12	9	1	8	3	2	5	19	13	7	4	6	17	10	23	11	24	28	21	18	14	15	20	26	27	22	29	16	25	1396
1397	1	13	8	0	9	2	3	4	19	12	7	5	6	16	11	22	10	25	28	21	18	15	14	20	27	26	23	29	17	24	1397
1398	1	13	8	0	9	2	3	4	19	12	7	5	6	16	11	22	10	25	28	21	17	15	14	20	27	26	23	29	18	24	1398
1399	0	12	9	1	8	3	2	5	19	13	7	4	6	17	10	23	11	25	29	21	16	14	15	20	26	27	22	28	18	24	1399
1400	0	11	10	2	7	3	1	6	20	14	8	4	5	18	9	24	12	26	29	22	15	13	16	19	25	27	21	28	17	23	1400
1401	0	11	10	2	7	3	1	6	20	14	8	4	5	18	9	24	12	26	29	22	15	13	16	19	25	27	21	28	17	23	1401
1402	0	12	9	1	8	3	2	5	20	13	7	4	6	17	10	23	11	25	29	21	16	14	15	19	26	27	22	28	18	24	1402
1403	1	12	9	0	8	2	3	5	20	13	7	4	6	17	10	23	11	25	29	21	16	14	15	19	27	26	22	28	18	24	1403
1404	1	11	10	0	7	2	3	6	19	14	8	4	5	18	9	24	12	26	29	22	15	13	16	20	27	25	21	28	17	23	1404
1405	0	11	10	1	7	3	2	6	19	14	8	4	5	18	9	24	12	27	28	22	15	13	17	20	26	25	21	29	16	23	1405
1406	0	12	9	1	7	3	2	5	19	13	8	4	6	18	10	23	11	27	28	22	15	14	17	20	26	25	21	29	16	24	1406
1407	0	12	9	1	7	3	2	5	19	13	8	4	6	18	10	23	11	27	29	22	15	14	17	20	26	24	21	28	16	25	1407
1408	0	12	9	1	8	3	2	5	20	14	7	4	6	18	10	24	11	27	29	21	16	13	17	19	25	23	22	28	15	26	1408
1409	1	13	9	0	8	3	2	5	20	14	7	4	6	18	10	24	11	26	29	21	16	12	17	19	25	23	22	28	15	27	1409
1410	1	13	10	0	7	3	2	5	20	14	8	4	6	18	9	23	11	25	29	22	15	12	17	19	26	24	21	28	16	27	1410
1411	0	12	11	1	6	2	3	4	20	15	9	5	7	19	8	22	10	24	29	23	14	13	16	18	27	25	21	28	17	26	1411
1412	0	12	11	1	6	2	3	4	20	15	9	5	7	19	8	22	10	24	29	23	14	13	16	18	27	25	21	28	17	26	1412
1413	1	13	10	0	7	2	3	5	20	14	8	4	6	18	9	23	11	25	29	22	15	12	16	19	26	24	21	28	17	27	1413
1414	1	13	9	0	7	2	3	5	20	14	8	4	6	18	10	24	11	26	29	21	15	12	16	19	25	23	22	28	17	27	1414
1415	0	12	9	1	7	2	3	4	20	14	8	5	6	18	10	24	11	27	29	21	15	13	17	19	25	23	22	28	16	26	1415
1416	0	12	9	1	7	2	3	4	20	14	8	5	6	18	10	23	11	27	29	22	15	13	17	19	26	24	21	28	16	25	1416
1417	1	12	9	0	7	2	3	5	20	14	8	4	6	18	10	23	11	26	29	22	15	13	17	19	27	24	21	28	16	25	1417
1418	1	12	9	0	7	2	3	5	20	14	8	4	6	18	10	23	11	25	29	21	15	13	17	19	27	24	22	28	16	26	1418
1419	0	13	9	1	7	2	3	5	20	14	8	4	6	18	11	23	10	25	29	21	15	12	16	19	26	24	22	28	17	27	1419
1420	0	13	9	1	7	2	3	5	20	14	8	4	6	18	11	24	10	26	29	21	15	12	16	19	25	23	22	28	17	27	1420
1421	1	12	8	0	7	2	3	5	20	14	9	4	6	18	10	24	11	27	29	21	15	13	17	19	25	23	22	28	16	26	1421
1422	1	12	8	0	7	2	3	5	19	14	9	4	6	18	10	23	11	27	29	21	15	13	17	20	26	24	22	28	16	25	1422
1423	0	13	8	1	7	2	3	5	19	14	9	4	6	18	10	23	11	26	29	21	15	12	17	20	27	24	22	28	16	25	1423
1424	0	13	8	1	7	2	3	5	20	14	9	4	6	17	10	24	11	26	29	21	15	12	18	19	27	23	22	28	16	25	1424
1425	1	12	9	0	6	3	2	5	20	15	8	4	7	16	11	24	10	27	29	21	14	13	18	19	26	23	22	28	17	25	1425
1426	1	12	9	0	6	3	2	5	20	15	8	4	7	16	11	24	10	27	29	21	14	13	18	19	26	23	22	28	17	25	1426
1427	0	13	8	1	7	2	3	5	20	14	9	4	6	16	10	24	11	26	28	21	15	12	18	19	27	23	22	29	17	25	1427
1428	0	14	8	1	7	2	3	5	20	13	10	4	6	16	9	23	12	25	28	22	15	11	18	19	27	24	21	29	17	26	1428
1429	1	14	8	0	6	2	3	5	20	13	10	4	7	16	9	23	12	25	29	22	15	11	18	19	26	24	21	28	17	27	1429
1430	1	13	8	0	6	2	3	5	20	14	9	4	7	16	10	24	11	26	29	21	15	12	17	19	25	23	22	28	18	27	1430
1431	1	12	8	0	6	2	3	5	20	14	9	4	7	16	10	24	11	26	29	21	15	13	17	19	25	23	22	28	18	27	1431
1432	2	11	8	0	6	1	3	5	20	13	10	4	7	16	9	24	12	25	29	22	15	14	18	19	26	23	21	28	17	27	1432
1433	2	11	8	0	6	1	3	5	20	13	10	4	7	16	9	24	12	25	29	22	15	14	18	19	27	23	21	28	17	26	1433
1434	1	12	8	0	6	2	3	5	20	14	9	4	7	16	10	24	11	26	29	21	15	13	17	19	27	23	22	28	18	25	1434
1435	1	13	8	0	7	2	3	5	20	14	9	4	6	16	10	24	11	27	29	21	15	12	17	19	26	22	23	28	18	25	1435
1436	1	13	8	0	7	2	3	5	20	14	10	4	6	16	9	24	11	27	29	21	15	12	18	19	26	22	23	28	17	25	1436
1437	1	12	8	0	7	2	3	5	20	14	10	4	6	16	9	24	11	27	29	21	15	13	18	19	26	23	22	28	17	25	1437
1438	1	12	8	0	7	2	3	5	20	14	9	4	6	16	10	24	11	27	29	21	15	13	18	19	26	23	22	28	17	25	1438
1439	1	12	8	0	7	2	3	5	20	14	9	4	6	16	10	24	11	27	29	21	15	13	18	19	26	23	22	28	17	25	1439
1440	1	12	8	0	7	2	3	5	20	14	9	4	6	16	10	24	11	27	29	21	15	13	18	19	25	23	22	28	17	26	1440
1441	1	12	9	0	7	2	3	4	20	14	8	5	6	16	11	24	10	27	29	21	15	13	18	19	25	23	22	28	17	26	1441
1442	1	12	9	0	7	2	3	4	20	14	8	5	6	16	11	23	10	27	29	21	15	13	18	19	26	24	22	28	17	25	1442
1443	1	12	9	0	7	2	3	4	20	14	8	5	6	16	10	22	11	26	29	21	15	13	18	19	27	24	23	28	17	25	1443
1444	1	12	9	0	7	2	3	4	20	14	8	5	6	16	10	22	11	25	29	21	15	13	17	19	27	24	23	28	18	26	1444
1445	0	13	8	1	6	2	3	5	20	14	9	4	7	16	10	23	11	25	29	21	15	12	17	19	26	24	22	28	18	27	1445
1446	0	13	8	1	6	2	3	5	20	14	9	4	7	16	10	23	11	25	29	21	15	12	18	19	26	24	22	28	17	27	1446
1447	1	12	9	0	7	2	3	4	21	14	8	5	6	17	10	22	11	25	29	20	15	13	18	19	27	24	23	28	16	26	1447
1448	1	11	10	0	7	2	3	4	21	13	8	5	6	17	9	22	12	26	29	20	15	14	18	19	27	24	23	28	16	25	1448
1449	0	11	10	1	6	2	3	5	20	13	9	4	7	16	8	23	12	27	29	21	14	15	18	19	26	25	22	28	17	24	1449
1450	0	12	10	1	6	2	3	5	20	13	9	4	7	16	8	23	11	27	29	21	14	15	18	19	26	25	22	28	17	24	1450
1451	0	12	10	1	7	3	2	5	20	13	8	4	6	17	9	23	11	26	29	21	15	14	18	19	27	24	22	28	16	25	1451
1452	0	12	9	1	7	3	2	5	20	13	8	4	6	17	10	23	11	26	29	21	15	14	18	19	27	24	22	28	16	25	1452
1453	0	12	9	1	7	3	2	4	20	13	8	5	6	17	10	23	11	27	29	21	15	14	18	19	26	24	22	28	16	25	1453
1454	0	11	9	1	7	3	2	4	20	14	8	5	6	18	10	23	12	27	29	21	16	13	17	19	25	24	22	28	15	26	1454
1455	1	11	8	0	6	3	2	5	20	14	9	4	7	18	10	23	12	26	29	21	16	13	17	19	25	24	22	28	15	27	1455
1456	1	12	8	0	6	3	2	5	20	14	9	4	7	17	10	23	11	26	29	21	16	13	18	19	25	24	22	28	15	27	1456
1457	1	12	8	0	6	3	2	4	20	14	9	5	7	17	10	22	11	27	29	21	16	13	18	19	25	24	23	28	15	26	1457
1458	1	12	8	0	6	3	2	4	20	14	9	5	7	17	10	22	11	27	29	21	16	13	18	19	25	24	23	28	15	26	1458
1459	0	13	9	1	7	2	3	5	21	15	8	4	6	16	11	23	10	26	29	20	17	12	19	18	24	25	22	28	14	27	1459
1460	0	13	9	1	7	2	3	5	21	15	8	4	6	16	11	23	10	25	29	20	17	12	19	18	24	26	22	27	14	28	1460
1461	1	12	8	0	6	2	3	4	20	14	9	5	7	17	10	22	11	25	29	21	16	13	18	19	24	26	23	27	15	28	1461
1462	1	11	8	0	5	2	3	4	20	13	9	6	7	17	10	22	12	26	29	21	16	14	18	19	24	25	23	28	15	27	1462
1463	0	10	9	1	4	3	2	5	20	12	8	7	6	16	11	23	13	27	29	21	17	15	19	18	25	24	22	28	14	26	1463
1464	0	10	9	1	4	3	2	5	20	12	8	7	6	16	11	23	13	27	29	21	17	15	19	18	26	24	22	28	14	25	1464
1465	1	11	8	0	5	3	2	4	20	13	9	6	7	17	10	22	12	27	29	21	16	14	19	18	26	24	23	28	15	25	1465
1466	1	12	8	0	6	3	2	4	20	13	9	5	7	17	10	21	11	27	29	22	16	14	19	18	25	24	23	28	15	26	1466
1467	0	13	8	1	6	3	2	4	20	12	9	5	7	17	10	21	11	26	29	22	16	14	18	19	25	24	23	28	15	27	1467
1468	0	13	8	1	5	3	2	4	20	12	9	6	7	17	10	22	11	25	29	21	16	14	18	19	26	24	23	28	15	27	1468
1469	1	12	9	0	4	2	3	5	20	13	8	7	6	16	11	23	10	24	29	21	17	15	19	18	27	25	22	28	14	26	1469
1470	1	12	9	0	4	2	3	5	20	13	8	7	6	16	11	23	10	24	29	22	18	15	19	17	27	26	21	28	14	25	1470
1471	0	13	8	1	5	3	2	4	20	12	9	6	7	16	10	23	11	25	29	22	18	14	19	17	26	27	21	28	15	24	1471
1472	0	13	8	1	6	3	2	4	20	12	9	5	7	16	10	23	11	26	29	21	17	14	19	18	25	27	22	28	15	24	1472
1473	0	12	8	1	6	3	2	4	20	13	9	5	7	16	10	23	11	27	29	21	17	14	18	19	24	26	22	28	15	25	1473
1474	0	12	8	1	5	3	2	4	20	13	9	6	7	16	10	23	11	27	29	21	17	14	18	19	24	26	22	28	15	25	1474
1475	0	12	9	1	5	2	3	4	20	13	8	6	7	16	10	22	11	26	29	21	17	15	19	18	25	27	23	28	14	24	1475
1476	0	11	10	2	6	1	4	3	20	14	8	5	7	16	9	21	12	25	29	22	18	15	19	17	26	27	24	28	13	23	1476
1477	0	11	10	2	7	1	4	3	20	15	8	5	6	16	9	21	12	25	29	22	18	14	19	17	27	26	24	28	13	23	1477
1478	0	12	9	1	7	2	3	4	20	15	8	5	6	16	10	22	11	26	29	21	17	14	19	18	27	25	23	28	13	24	1478
1479	1	12	8	0	6	3	2	4	20	14	9	5	7	16	10	23	11	27	29	21	17	15	19	18	26	24	22	28	13	25	1479
1480	1	11	8	0	5	4	2	3	20	13	10	6	7	16	9	23	12	27	29	22	18	15	19	17	25	24	21	28	14	26	1480
1481	0	11	8	1	5	4	2	3	20	13	10	7	6	16	9	22	12	26	29	23	18	14	19	17	24	25	21	28	15	27	1481
1482	0	12	8	1	6	3	2	4	20	13	10	7	5	16	9	21	11	26	29	23	17	14	19	18	24	25	22	28	15	27	1482
1483	1	13	8	0	7	2	3	4	20	12	10	6	5	16	9	21	11	27	29	23	17	15	19	18	24	25	22	28	14	26	1483
1484	1	13	8	0	7	2	3	4	20	12	9	6	5	16	10	22	11	27	29	23	17	15	19	18	24	25	21	28	14	26	1484
1485	0	12	8	1	7	3	2	4	20	13	9	6	5	16	10	22	11	27	29	23	17	15	19	18	25	24	21	28	14	26	1485
1486	0	12	8	1	7	3	2	4	20	13	10	6	5	16	9	21	11	27	29	23	17	15	19	18	26	24	22	28	14	25	1486
1487	0	12	8	1	6	2	3	4	20	13	10	7	5	16	9	21	11	26	29	23	17	14	19	18	27	24	22	28	15	25	1487
1488	0	11	8	1	6	2	3	4	20	14	9	7	5	16	10	21	12	25	29	24	18	13	19	17	27	23	22	28	15	26	1488
1489	1	11	9	0	7	2	3	5	20	15	8	6	4	16	10	21	12	24	29	25	18	13	19	17	26	22	23	28	14	27	1489
1490	1	12	9	0	7	2	3	5	20	15	8	6	4	16	10	21	11	24	29	26	17	14	19	18	25	22	23	28	13	27	1490
1491	0	12	8	1	6	3	2	4	20	14	9	7	5	16	10	21	11	25	29	27	17	15	18	19	24	23	22	28	13	26	1491
1492	0	12	8	1	6	3	2	4	20	14	10	7	5	16	9	21	11	26	29	27	17	15	18	19	24	23	22	28	13	25	1492
1493	0	12	8	1	7	2	3	4	20	15	11	6	5	16	9	21	10	27	29	26	17	14	18	19	24	22	23	28	13	25	1493
1494	0	12	8	1	7	2	3	4	20	15	11	6	5	16	9	21	10	27	29	25	17	14	18	19	23	22	24	28	13	26	1494
1495	1	12	8	0	6	2	3	4	20	14	10	7	5	16	9	21	11	26	29	25	17	15	18	19	23	22	24	28	13	27	1495
1496	1	12	8	0	6	2	3	4	20	14	9	7	5	16	10	22	11	25	29	26	17	15	18	19	24	21	23	28	13	27	1496
1497	1	13	8	0	6	2	3	4	20	15	9	7	5	16	10	23	11	25	29	27	17	14	18	19	24	21	22	28	12	26	1497
1498	1	13	8	0	6	2	3	4	20	15	10	7	5	16	9	24	11	26	29	27	17	14	18	19	23	22	21	28	12	25	1498
1499	0	12	8	1	6	2	3	4	20	14	10	7	5	16	9	24	11	27	29	26	17	15	18	19	23	22	21	28	13	25	1499
1500	0	12	8	1	5	2	3	4	20	13	9	7	6	16	10	23	11	27	29	25	17	15	18	19	24	21	22	28	14	26	1500
1501	1	12	8	0	5	2	3	4	20	13	9	7	6	16	11	22	10	26	29	25	17	15	18	19	24	21	23	28	14	27	1501
1502	2	11	7	0	6	1	4	3	19	14	10	8	5	16	12	21	9	25	29	26	18	15	17	20	23	22	24	28	13	27	1502
1503	2	11	7	0	6	1	4	3	19	15	10	8	5	16	12	21	9	25	29	27	18	14	17	20	23	22	24	28	13	26	1503
1504	1	12	8	0	6	2	3	4	20	15	9	7	5	16	11	22	10	25	29	27	17	14	18	19	24	21	23	28	13	26	1504
1505	0	13	9	1	7	3	2	4	20	14	8	6	5	16	10	23	11	24	29	26	17	15	18	19	25	21	22	28	12	27	1505
1506	0	13	9	1	7	3	2	4	20	14	8	6	5	16	10	23	11	24	29	25	17	15	18	19	26	22	21	28	12	27	1506
1507	1	12	8	0	6	2	3	4	20	15	9	7	5	17	11	22	10	25	29	24	16	14	19	18	27	23	21	28	13	26	1507
1508	1	12	8	0	6	2	3	4	20	15	10	7	5	17	11	21	9	26	29	24	16	13	19	18	27	23	22	28	14	25	1508
1509	1	12	8	0	7	3	2	4	20	14	10	6	5	17	11	21	9	26	29	25	16	13	18	19	27	22	23	28	15	24	1509
1510	1	12	8	0	7	3	2	4	19	13	9	6	5	17	11	22	10	25	29	26	16	14	18	20	27	21	23	28	15	24	1510
1511	1	12	8	0	6	3	2	4	19	13	9	7	5	17	10	22	11	24	29	26	16	14	18	20	27	21	23	28	15	25	1511
1512	1	12	8	0	6	3	2	4	20	14	9	7	5	17	10	21	11	24	29	25	16	13	18	19	27	22	23	28	15	26	1512
1513	1	12	8	0	7	2	3	4	20	15	9	6	5	17	11	21	10	24	29	25	16	13	18	19	27	22	23	28	14	26	1513
1514	1	12	8	0	7	2	3	4	20	16	9	5	6	18	11	22	10	23	29	26	15	14	17	19	27	21	24	28	13	25	1514
1515	1	12	8	0	6	2	3	4	20	16	9	5	7	18	10	23	11	22	29	26	15	14	17	19	27	21	24	28	13	25	1515
1516	1	12	8	0	6	2	3	4	20	15	10	5	7	17	9	23	11	22	29	25	16	13	18	19	27	21	24	28	14	26	1516
1517	1	13	9	0	7	3	2	4	20	14	10	5	6	17	8	22	11	23	28	25	16	12	19	18	26	21	24	29	15	27	1517
1518	1	13	9	0	7	3	2	4	20	14	10	5	6	17	8	22	11	24	28	25	16	12	19	18	26	21	23	29	15	27	1518
1519	1	12	8	0	7	2	3	4	20	14	10	5	6	17	9	22	11	24	28	25	16	13	18	19	26	21	23	29	15	27	1519
1520	1	12	8	0	7	2	3	4	20	13	10	6	5	17	9	21	11	24	28	26	16	14	18	19	25	22	23	29	15	27	1520
1521	0	13	9	1	7	3	2	4	20	12	10	6	5	16	8	21	11	25	28	27	17	15	19	18	24	23	22	29	14	26	1521
1522	0	13	9	1	7	3	2	4	20	12	10	5	6	16	8	21	11	25	28	27	17	15	19	18	24	23	22	29	14	26	1522
1523	1	12	8	0	6	2	3	4	20	13	10	5	7	16	9	21	11	24	28	26	17	14	18	19	25	22	23	29	15	27	1523
1524	1	12	8	0	6	2	3	4	20	14	9	5	7	16	10	21	11	24	28	25	17	13	18	19	26	22	23	29	15	27	1524
1525	1	12	8	0	6	2	3	4	20	14	9	5	7	16	11	21	10	24	28	25	17	13	18	19	26	22	23	29	15	27	1525
1526	1	11	8	0	5	2	3	4	20	13	10	6	7	15	12	22	9	24	28	26	18	14	17	19	25	21	23	29	16	27	1526
1527	1	11	8	0	5	2	3	4	20	13	10	6	7	15	12	22	9	25	28	26	18	14	17	19	24	21	23	29	16	27	1527
1528	1	12	8	0	6	2	3	4	20	14	9	5	7	16	11	21	10	25	28	26	18	13	17	19	24	22	23	29	15	27	1528
1529	0	13	8	1	7	2	3	5	21	15	9	4	6	16	10	20	11	24	28	27	19	12	17	18	25	23	22	29	14	26	1529
1530	0	13	8	1	7	2	3	5	21	15	9	4	6	16	10	20	11	24	28	27	19	12	18	17	26	23	22	29	14	25	1530
1531	1	13	8	0	7	2	3	4	20	14	9	5	6	16	11	21	10	24	28	26	19	12	18	17	27	22	23	29	15	25	1531
1532	1	14	8	0	7	2	3	4	20	13	10	5	6	16	12	21	9	24	28	25	19	11	17	18	27	22	23	29	15	26	1532
1533	1	14	8	0	6	2	3	4	20	13	10	5	7	16	12	21	9	25	28	24	19	11	17	18	26	23	22	29	15	27	1533
1534	1	14	8	0	6	2	3	4	20	13	9	5	7	16	11	21	10	26	28	24	19	12	17	18	25	23	22	29	15	27	1534
1535	1	15	8	0	7	2	3	4	20	13	9	5	6	16	10	21	11	27	28	24	19	12	17	18	25	22	23	29	14	26	1535
1536	2	16	8	0	7	1	3	4	20	14	10	6	5	15	9	22	12	27	28	24	19	11	17	18	26	21	23	29	13	25	1536
1537	2	17	9	1	6	0	3	4	21	15	11	7	5	14	8	23	13	26	28	25	18	10	16	19	27	20	22	29	12	24	1537
1538	2	17	9	1	5	0	3	4	21	15	11	7	6	14	8	23	13	26	28	25	18	10	16	19	27	20	22	29	12	24	1538
1539	2	17	8	0	5	1	3	4	20	14	10	6	7	15	9	23	12	27	28	24	19	11	16	18	26	21	22	29	13	25	1539
1540	1	17	8	0	6	2	3	4	20	13	9	5	7	16	10	23	11	27	28	24	19	12	15	18	25	22	21	29	14	26	1540
1541	1	17	8	0	6	2	3	4	20	13	9	5	7	16	10	23	11	26	28	24	18	12	15	19	25	22	21	29	14	27	1541
1542	2	18	8	0	5	1	3	4	20	14	10	6	7	16	9	23	11	25	28	24	17	12	15	19	26	21	22	29	13	27	1542
1543	2	18	8	0	5	1	3	4	20	15	10	6	7	16	9	23	11	25	28	24	17	12	14	19	27	21	22	29	13	26	1543
1544	2	18	8	0	6	1	3	4	20	15	10	5	7	16	9	23	11	25	28	24	17	12	13	19	27	22	21	29	14	26	1544
1545	2	18	8	0	6	1	3	4	20	15	10	5	7	16	9	23	11	25	28	24	17	12	13	19	26	22	21	29	14	27	1545
1546	1	18	7	0	5	2	3	4	20	16	10	6	8	15	9	23	11	26	28	24	17	12	14	19	25	21	22	29	13	27	1546
1547	0	18	7	1	5	2	3	4	20	16	11	6	8	14	9	22	10	26	28	25	17	13	15	19	24	21	23	29	12	27	1547
1548	0	18	8	2	5	1	3	4	20	16	11	6	7	14	9	21	10	25	28	26	17	13	15	19	24	22	23	29	12	27	1548
1549	1	19	9	2	4	0	3	5	21	16	10	7	6	15	8	20	11	24	28	27	17	12	14	18	25	23	22	29	13	26	1549
1550	2	19	9	1	4	0	3	5	21	15	10	7	6	16	8	20	11	24	28	27	17	12	13	18	26	23	22	29	14	25	1550
1551	2	18	8	0	5	1	3	4	20	15	10	6	7	16	9	21	11	24	28	26	17	12	13	19	27	22	23	29	14	25	1551
1552	1	18	8	0	5	2	3	4	20	15	10	6	7	16	9	22	11	24	28	25	17	12	14	19	27	21	23	29	13	26	1552
1553	1	19	8	0	5	2	3	4	20	15	10	6	7	16	9	23	11	24	28	25	17	13	14	18	27	21	22	29	12	26	1553
1554	2	19	8	0	5	1	3	4	20	16	9	6	7	15	10	23	11	24	28	26	17	14	13	18	27	21	22	29	12	25	1554
1555	2	18	8	0	5	1	3	4	20	16	9	6	7	14	10	22	11	24	28	26	17	15	12	19	27	21	23	29	13	25	1555
1556	1	17	7	0	6	2	4	3	19	15	10	5	8	13	9	21	12	23	27	25	18	16	11	20	28	22	24	29	14	26	1556
1557	1	17	7	0	6	2	4	3	19	15	10	5	8	13	9	21	12	23	27	25	18	16	11	20	28	22	24	29	14	26	1557
1558	2	18	8	0	5	1	3	4	19	15	10	6	7	14	9	22	11	24	28	25	17	16	12	20	27	21	23	29	13	26	1558
1559	2	18	8	1	5	0	3	4	19	14	10	6	7	15	9	23	11	24	28	25	16	17	13	20	26	21	22	29	12	27	1559
1560	1	18	8	2	6	0	3	4	20	14	9	5	7	15	10	23	11	24	28	26	16	17	13	19	25	22	21	29	12	27	1560
1561	0	18	8	2	6	1	3	4	20	15	9	5	7	14	10	22	11	24	28	27	17	16	12	19	25	23	21	29	13	26	1561
1562	0	18	8	1	5	2	3	4	20	15	10	6	7	14	9	22	11	24	28	27	17	16	12	19	26	23	21	29	13	25	1562
1563	1	18	8	0	5	2	3	4	20	14	10	6	7	15	9	23	11	24	28	26	16	17	13	19	27	22	21	29	12	25	1563
1564	1	18	8	0	6	2	3	4	20	14	9	5	7	15	10	24	11	23	28	26	16	17	13	19	27	21	22	29	12	25	1564
1565	1	18	8	0	6	2	3	4	20	15	9	5	7	14	10	24	11	22	28	26	17	16	12	19	27	21	23	29	13	25	1565
1566	2	18	8	0	5	1	3	4	20	15	9	6	7	13	10	23	11	21	28	26	17	16	12	19	27	22	24	29	14	25	1566
1567	2	19	8	1	5	0	3	4	20	14	9	6	7	12	10	22	11	21	28	27	16	17	13	18	26	23	24	29	15	25	1567
1568	1	19	8	2	6	0	3	4	20	13	9	5	7	12	10	21	11	22	28	27	16	17	14	18	25	24	23	29	15	26	1568
1569	0	18	8	2	6	1	3	4	20	12	9	5	7	13	10	21	11	22	28	27	16	17	15	19	25	24	23	29	14	26	1569
1570	0	18	8	1	6	2	3	4	19	12	10	5	7	14	9	22	11	21	28	27	16	17	15	20	26	23	24	29	13	25	1570
1571	1	19	8	0	6	2	3	4	18	13	10	5	7	15	9	23	11	21	28	27	16	17	14	20	26	22	24	29	12	25	1571
1572	1	19	8	0	6	2	4	3	18	13	9	5	7	15	10	24	11	21	28	27	16	17	14	20	26	22	23	29	12	25	1572
1573	1	19	8	0	6	2	4	3	18	13	9	5	7	15	10	24	11	21	28	27	16	17	14	20	26	22	23	29	12	25	1573
1574	2	19	7	0	5	1	3	4	18	14	10	6	8	15	9	23	11	22	27	28	16	17	13	20	25	21	24	29	12	26	1574
1575	2	19	7	1	5	0	3	4	18	15	10	6	8	14	9	22	11	23	27	28	17	16	13	20	25	21	24	29	12	26	1575
1576	1	20	8	2	5	0	3	4	18	15	9	6	7	13	10	21	11	23	28	27	17	16	14	19	26	22	24	29	12	25	1576
1577	0	20	8	2	5	1	3	4	18	14	9	6	7	13	10	21	11	22	29	27	16	17	15	19	26	23	24	28	12	25	1577
1578	0	20	8	1	6	2	4	3	18	13	9	5	7	14	10	22	11	21	29	27	16	17	15	19	26	23	24	28	12	25	1578
1579	1	20	8	0	6	2	4	3	18	12	9	5	7	14	10	23	11	21	28	27	16	17	15	19	26	22	24	29	13	25	1579
1580	2	20	8	0	5	1	3	4	18	12	10	6	7	13	9	24	11	22	27	28	15	17	16	19	25	21	23	29	14	26	1580
1581	2	20	8	0	5	1	3	4	18	12	10	6	7	13	9	24	11	23	27	28	15	17	16	19	25	21	22	29	14	26	1581
1582	1	20	8	0	6	2	4	3	18	12	9	5	7	14	10	23	11	24	28	27	16	17	15	19	26	22	21	29	13	25	1582
1583	1	20	8	0	6	2	4	3	18	12	9	5	7	14	10	22	11	24	29	26	16	17	15	19	27	23	21	28	13	25	1583
1584	2	20	8	0	5	1	3	4	18	12	9	6	7	13	10	21	11	24	29	25	15	17	16	19	27	23	22	28	14	26	1584
1585	2	20	8	1	5	0	3	4	18	13	9	6	7	12	10	21	11	24	28	25	15	16	17	19	26	22	23	29	14	27	1585
1586	2	20	8	1	6	0	3	4	18	14	9	5	7	12	10	22	11	24	28	25	16	15	17	19	26	21	23	29	13	27	1586
1587	2	20	9	0	7	1	3	4	18	15	8	5	6	13	10	23	11	24	29	25	17	14	16	19	27	21	22	28	12	26	1587
1588	1	19	9	0	7	2	3	4	18	15	8	5	6	13	10	23	11	24	29	26	17	14	16	20	27	21	22	28	12	25	1588
1589	1	19	8	0	6	2	3	4	18	14	9	5	7	13	10	22	11	24	28	26	17	15	16	20	27	21	23	29	12	25	1589
1590	1	19	8	0	6	2	4	3	18	13	9	5	7	14	10	22	11	24	28	26	17	16	15	20	27	21	23	29	12	25	1590
1591	0	19	9	1	7	2	4	3	18	12	8	5	6	15	11	23	10	24	28	27	17	16	14	21	26	20	22	29	13	25	1591
1592	0	19	9	1	7	2	3	4	18	12	8	5	6	15	11	23	10	24	28	27	17	16	14	21	26	20	22	29	13	25	1592
1593	1	19	8	0	6	2	3	4	18	13	9	5	7	14	10	22	11	24	28	26	17	16	15	21	27	20	23	29	12	25	1593
1594	2	19	8	0	6	1	4	3	18	14	9	5	7	13	10	21	11	24	27	26	17	16	15	22	28	20	23	29	12	25	1594
1595	2	19	8	0	6	1	4	3	18	14	9	5	7	13	11	21	10	24	27	26	17	16	15	22	28	20	23	29	12	25	1595
1596	1	19	8	0	6	2	3	4	18	13	9	5	7	14	11	22	10	24	28	26	17	16	15	21	27	20	23	29	12	25	1596
1597	1	19	9	0	6	2	3	4	18	13	8	5	7	15	10	22	11	24	28	26	17	16	14	21	27	20	23	29	12	25	1597
1598	2	19	9	0	6	1	3	4	18	14	8	5	7	15	10	21	11	24	28	26	17	16	13	22	27	20	23	29	12	25	1598
1599	2	19	8	0	7	1	3	4	18	15	9	5	6	14	11	21	10	25	28	27	17	16	13	23	26	20	22	29	12	24	1599
1600	1	19	8	0	7	2	3	4	18	15	9	5	6	14	11	22	10	25	28	27	17	16	13	23	26	20	21	29	12	24	1600
1601	0	19	9	1	6	2	3	4	18	14	8	5	7	15	10	23	11	24	28	26	17	16	13	22	27	20	21	29	12	25	1601
1602	0	19	9	1	5	2	4	3	18	14	7	6	8	15	10	23	11	24	27	26	17	16	13	21	28	20	22	29	12	25	1602
1603	1	18	8	0	5	2	4	3	19	15	7	6	9	14	11	22	10	25	26	27	17	16	12	20	28	21	23	29	13	24	1603
1604	2	18	7	0	6	1	3	4	19	15	8	5	9	13	11	21	10	25	26	27	17	16	12	20	28	22	23	29	14	24	1604
1605	2	19	6	1	7	0	3	4	18	14	9	5	8	12	10	20	11	24	27	26	17	16	13	21	28	23	22	29	15	25	1605
1606	2	19	6	1	7	0	3	4	18	14	9	5	8	12	10	20	11	24	28	26	17	16	13	21	27	23	22	29	15	25	1606
1607	2	19	7	0	6	1	3	4	18	15	8	5	9	13	11	21	10	24	28	27	17	16	12	20	26	22	23	29	14	25	1607
1608	1	19	7	0	5	2	3	4	18	15	8	6	9	14	11	22	10	24	28	27	17	16	12	20	26	21	23	29	13	25	1608
1609	0	18	7	1	5	2	3	4	19	14	8	6	9	15	10	23	11	24	28	26	17	16	13	21	27	20	22	29	12	25	1609
1610	0	18	7	1	6	2	3	4	19	14	8	5	9	15	10	23	11	24	28	26	17	16	13	21	27	20	22	29	12	25	1610
1611	1	19	7	0	6	2	3	4	18	15	8	5	9	14	11	22	10	24	28	27	17	16	12	20	26	21	23	29	13	25	1611
1612	2	19	8	0	5	1	4	3	18	16	7	6	9	13	12	21	10	24	28	27	17	15	11	20	25	22	23	29	14	26	1612
1613	2	19	8	0	5	1	4	3	18	16	7	6	9	13	12	20	10	24	28	27	17	15	11	21	25	22	23	29	14	26	1613
1614	1	19	7	0	6	2	3	4	18	15	8	5	9	14	11	20	10	24	28	27	17	16	12	22	26	21	23	29	13	25	1614
1615	0	19	7	1	6	2	3	4	18	14	8	5	9	15	10	20	11	25	28	27	17	16	12	22	26	21	23	29	13	24	1615
1616	0	19	7	1	6	2	3	4	18	14	8	5	9	15	10	20	11	25	28	27	17	16	12	22	26	21	23	29	13	24	1616
1617	0	19	7	1	6	2	3	4	18	15	8	5	9	14	10	20	11	25	28	27	17	16	12	22	26	21	23	29	13	24	1617
1618	0	19	8	2	5	1	4	3	18	16	7	6	9	13	10	20	12	25	27	28	17	15	11	21	26	22	23	29	14	24	1618
1619	1	19	8	2	5	0	4	3	18	16	7	6	9	13	10	20	12	24	26	29	17	15	11	21	27	22	23	28	14	25	1619
1620	2	19	7	1	6	0	3	4	18	15	8	5	9	14	10	20	11	24	26	29	17	16	12	22	27	21	23	28	13	25	1620
1621	2	18	7	0	6	1	3	4	19	15	8	5	9	14	11	20	10	24	27	28	17	16	12	22	26	21	23	29	13	25	1621
1622	1	18	8	0	5	2	4	3	19	16	7	6	10	13	11	20	9	23	28	27	17	15	12	21	25	22	24	29	14	26	1622
1623	0	19	8	1	5	2	4	3	18	16	7	6	10	13	11	20	9	23	28	27	17	15	12	21	25	22	24	29	14	26	1623
1624	0	19	7	2	6	1	3	4	18	15	8	5	9	14	11	20	10	24	27	28	17	16	12	22	26	21	23	29	13	25	1624
1625	1	18	6	2	7	0	3	4	19	14	9	5	8	15	10	21	11	25	26	29	16	17	13	23	27	20	22	28	12	24	1625
1626	2	18	6	1	7	0	4	3	19	14	9	5	8	15	10	22	11	25	26	29	16	17	13	23	28	20	21	27	12	24	1626
1627	2	19	7	0	6	1	4	3	18	15	8	5	9	14	11	23	10	24	27	29	17	16	12	22	28	20	21	26	13	25	1627
1628	1	19	7	0	6	2	3	4	18	15	8	5	9	13	11	23	10	24	27	29	17	16	12	21	28	20	22	26	14	25	1628
1629	1	18	7	0	6	2	3	4	19	15	8	5	9	13	11	22	10	24	27	28	17	16	12	20	29	21	23	26	14	25	1629
1630	1	18	7	0	6	2	3	4	19	15	8	5	9	14	11	22	10	23	27	28	17	16	12	20	29	21	24	26	13	25	1630
1631	1	18	6	0	7	2	3	4	19	15	8	5	9	14	11	22	10	23	27	29	17	16	13	20	28	21	24	26	12	25	1631
1632	1	18	6	0	7	2	3	4	19	16	8	5	9	13	11	22	10	23	27	29	17	15	14	20	28	21	24	26	12	25	1632
1633	0	19	7	1	6	2	3	4	18	16	8	5	9	12	11	23	10	22	26	29	17	14	15	20	28	21	25	27	13	24	1633
1634	0	19	7	1	5	2	3	4	17	16	8	6	9	12	11	23	10	22	26	29	18	13	15	20	28	21	25	27	14	24	1634
1635	1	18	7	0	5	2	3	4	17	16	8	6	9	13	11	22	10	23	27	29	19	12	14	20	28	21	24	26	15	25	1635
1636	1	18	7	0	5	2	3	4	17	16	8	6	9	13	11	21	10	23	27	29	19	12	14	20	28	22	24	26	15	25	1636
1637	1	19	7	0	5	2	3	4	17	16	8	6	9	12	11	21	10	23	27	29	18	13	14	20	28	22	24	26	15	25	1637
1638	2	19	7	0	6	1	4	3	18	16	8	5	9	12	11	22	10	24	28	29	17	14	13	20	27	21	23	25	15	26	1638
1639	2	18	6	0	7	1	4	3	19	16	9	5	8	13	10	22	11	24	28	29	17	15	12	21	27	20	23	25	14	26	1639
1640	1	17	5	0	7	2	3	4	19	16	9	6	8	14	10	21	11	23	27	29	18	15	12	22	28	20	24	26	13	25	1640
1641	0	17	5	1	6	2	3	4	18	16	8	7	9	15	11	20	10	23	26	29	19	14	13	22	28	21	25	27	12	24	1641
1642	0	18	6	1	5	2	3	4	17	16	8	7	9	15	11	20	10	23	26	29	19	13	14	21	28	22	25	27	12	24	1642
1643	1	19	7	0	5	2	3	4	17	16	8	6	9	15	11	21	10	23	27	29	18	12	14	20	28	22	25	26	13	24	1643
1644	1	19	7	0	5	2	3	4	18	16	8	6	9	15	11	21	10	23	27	29	17	12	13	20	28	22	25	26	14	24	1644
1645	1	19	7	0	5	2	3	4	18	16	8	6	9	14	11	20	10	22	27	29	17	12	13	21	28	23	25	26	15	24	1645
1646	1	19	8	0	6	2	3	4	17	16	7	5	9	14	11	20	10	22	27	29	18	12	13	21	28	23	25	26	15	24	1646
1647	0	18	9	1	7	2	3	4	17	16	6	5	8	15	10	21	11	23	26	29	19	13	12	20	28	22	25	27	14	24	1647
1648	0	18	9	2	7	1	3	4	17	16	6	5	8	15	10	22	11	23	25	29	19	14	12	20	27	21	26	28	13	24	1648
1649	1	19	8	2	6	0	3	4	17	16	7	5	9	15	11	22	10	23	25	29	18	14	12	20	27	21	26	28	13	24	1649
1650	2	19	7	1	5	0	3	4	18	16	8	6	10	15	12	21	9	24	26	29	17	13	11	20	28	22	25	27	14	23	1650
1651	2	19	7	0	5	1	3	4	18	16	8	6	10	14	12	21	9	24	26	29	17	13	11	20	28	22	25	27	15	23	1651
1652	1	19	8	0	6	2	3	4	17	16	7	5	9	13	11	22	10	23	25	29	18	14	12	20	27	21	26	28	15	24	1652
1653	0	19	8	1	6	2	3	4	17	16	7	5	9	13	11	23	10	22	25	29	18	14	12	20	27	21	26	28	15	24	1653
1654	0	19	8	1	6	2	3	4	18	16	7	5	9	14	11	23	10	21	26	29	17	13	12	20	28	22	25	27	15	24	1654
1655	0	19	8	1	6	2	3	4	18	16	7	5	9	14	11	22	10	21	26	28	17	12	13	20	29	23	25	27	15	24	1655
1656	0	19	8	1	6	2	3	4	17	16	7	5	9	14	11	21	10	22	26	28	18	12	13	20	29	23	25	27	15	24	1656
1657	1	19	8	0	6	2	3	4	17	16	7	5	9	15	11	21	10	23	26	29	18	13	12	20	28	22	25	27	14	24	1657
1658	2	19	8	0	6	1	3	4	17	16	7	5	9	15	11	21	10	24	26	29	18	13	12	20	28	22	25	27	14	23	1658
1659	2	19	8	1	6	0	3	4	17	16	7	5	9	14	10	21	11	24	27	28	18	13	12	20	29	23	25	26	15	22	1659
1660	1	19	7	2	6	0	3	4	17	16	8	5	9	13	10	22	11	24	27	28	18	14	12	20	29	23	26	25	15	21	1660
1661	0	19	7	2	6	1	3	4	16	17	9	5	8	13	11	23	10	24	26	29	18	15	12	20	28	22	27	25	14	21	1661
1662	0	19	7	1	6	2	3	4	16	17	9	5	8	14	11	23	10	24	25	29	18	15	12	20	28	21	27	26	13	22	1662
1663	1	19	7	0	6	2	3	4	16	17	8	5	9	15	10	22	11	24	25	28	18	14	12	20	29	21	26	27	13	23	1663
1664	1	19	8	0	6	2	3	4	16	17	7	5	9	15	10	21	11	24	26	28	18	13	12	20	29	22	25	27	14	23	1664
1665	1	19	8	0	6	2	3	4	17	16	7	5	9	14	11	21	10	24	26	28	18	13	12	20	29	23	25	27	15	22	1665
1666	2	19	7	0	6	1	3	4	17	16	8	5	9	14	11	21	10	24	26	28	18	13	12	20	29	23	25	27	15	22	1666
1667	2	19	6	1	7	0	3	4	16	17	9	5	8	15	10	20	11	24	27	28	18	12	13	21	29	22	25	26	14	23	1667
1668	2	19	6	1	7	0	3	4	16	17	9	5	8	15	10	20	11	23	27	28	18	12	13	21	29	22	25	26	14	24	1668
1669	2	19	7	0	6	1	3	4	16	17	8	5	9	15	11	21	10	22	26	29	18	13	12	20	28	23	25	27	14	24	1669
1670	1	20	8	0	5	2	4	3	16	18	7	6	9	15	11	22	10	21	25	29	17	14	12	19	28	24	26	27	13	23	1670
1671	1	20	8	0	5	2	4	3	16	18	7	6	9	14	10	22	11	21	25	28	17	15	12	19	29	24	26	27	13	23	1671
1672	2	19	7	0	6	1	3	4	16	17	8	5	9	13	10	21	11	22	26	28	18	15	12	20	29	23	25	27	14	24	1672
1673	2	19	7	0	6	1	3	4	16	17	8	5	9	13	10	21	11	22	27	28	18	14	12	20	29	23	25	26	15	24	1673
1674	1	20	7	0	6	2	3	4	16	17	8	5	9	13	10	21	11	22	28	27	18	14	12	19	29	23	25	26	15	24	1674
1675	1	20	7	0	6	2	3	4	16	17	9	5	8	13	10	21	11	22	28	27	18	15	12	19	29	23	25	26	14	24	1675
1676	2	20	7	0	6	1	3	4	16	17	9	5	8	14	10	21	11	22	27	28	18	15	12	19	29	23	25	26	13	24	1676
1677	2	20	7	0	6	1	3	4	16	17	8	5	9	14	10	21	11	22	27	28	18	15	13	19	29	23	25	26	12	24	1677
1678	1	20	7	0	6	2	3	4	16	17	8	5	9	13	10	21	11	22	28	27	18	15	14	19	29	23	25	26	12	24	1678
1679	1	20	7	0	6	2	3	4	16	17	8	5	9	12	10	21	11	22	28	27	18	14	15	19	29	23	25	26	13	24	1679
1680	2	20	7	0	6	1	3	4	16	17	8	5	9	12	10	22	11	21	27	28	18	14	15	19	29	23	25	26	13	24	1680
1681	2	20	7	0	6	1	3	4	16	17	9	5	8	13	10	23	11	21	27	28	18	14	15	19	29	22	25	26	12	24	1681
1682	1	19	8	0	5	2	3	4	15	17	9	6	7	14	10	24	11	22	28	27	18	13	16	20	29	21	26	25	12	23	1682
1683	1	19	9	0	5	2	3	4	15	17	8	6	7	14	11	24	10	22	28	27	18	12	16	20	29	21	26	25	13	23	1683
1684	2	19	9	0	6	1	3	4	16	17	7	5	8	13	11	23	10	21	27	28	18	12	15	20	29	22	25	26	14	24	1684
1685	2	19	8	0	6	1	3	4	16	17	7	5	9	12	10	22	11	21	27	28	18	13	15	20	29	23	25	26	14	24	1685
1686	1	19	8	0	6	2	3	4	16	17	7	5	9	12	10	21	11	22	28	27	18	13	15	20	29	23	25	26	14	24	1686
1687	1	19	8	0	6	2	3	4	16	17	7	5	9	13	11	21	10	22	29	26	18	12	15	20	28	23	25	27	14	24	1687
1688	2	19	7	0	6	1	3	4	16	17	8	5	9	13	11	22	10	21	29	26	18	12	15	20	28	23	25	27	14	24	1688
1689	2	19	7	0	6	1	3	4	16	17	8	5	9	13	10	23	11	21	28	26	18	12	15	20	29	22	25	27	14	24	1689
1690	1	19	8	0	6	2	3	4	16	17	7	5	9	14	10	23	11	21	28	26	18	12	15	20	29	22	25	27	13	24	1690
1691	1	19	8	0	6	2	3	4	16	17	7	5	9	14	11	22	10	21	28	27	18	12	15	20	29	23	25	26	13	24	1691
1692	2	19	8	0	6	1	3	4	16	17	7	5	9	13	11	21	10	22	28	27	18	12	15	20	29	23	26	25	14	24	1692
1693	2	19	9	0	6	1	3	4	16	17	7	5	8	12	10	21	11	23	28	27	18	13	15	20	29	22	26	25	14	24	1693
1694	2	19	10	0	6	1	3	4	15	17	7	5	8	12	9	21	11	23	28	27	18	13	16	20	29	22	25	26	14	24	1694
1695	2	19	10	0	6	1	3	4	15	17	7	5	8	12	9	21	11	22	28	27	18	13	16	20	29	23	25	26	14	24	1695
1696	2	19	10	0	6	1	3	4	16	17	7	5	8	12	9	21	11	22	28	27	18	13	15	20	29	23	25	26	14	24	1696
1697	2	19	10	0	6	1	3	4	16	17	7	5	8	13	9	21	11	22	29	27	18	12	15	20	28	23	25	26	14	24	1697
1698	1	19	9	0	6	2	3	4	16	17	7	5	8	13	10	21	11	22	29	27	18	12	15	20	28	23	26	25	14	24	1698
1699	1	19	9	0	6	2	3	4	16	17	7	5	8	12	10	21	11	22	28	27	18	13	15	20	29	23	26	25	14	24	1699
1700	2	19	10	0	6	1	3	4	15	17	7	5	8	12	9	21	11	22	28	27	18	13	16	20	29	23	25	26	14	24	1700
1701	2	19	10	0	7	1	3	4	15	17	6	5	8	13	9	21	11	22	29	27	18	12	16	20	28	23	25	26	14	24	1701
1702	1	19	9	0	8	2	3	4	16	17	6	5	7	13	10	21	11	22	29	27	18	12	15	20	28	23	26	25	14	24	1702
1703	0	19	9	1	8	2	3	4	16	17	7	5	6	12	11	21	10	23	28	26	18	13	14	20	29	22	27	25	15	24	1703
1704	0	19	9	1	8	2	3	4	16	17	7	5	6	12	11	21	10	23	28	26	18	13	14	20	29	22	27	25	15	24	1704
1705	1	19	9	0	8	2	3	4	16	17	6	5	7	13	10	21	11	22	28	27	18	12	15	20	29	23	26	25	14	24	1705
1706	2	20	10	0	7	1	3	4	16	18	5	6	8	14	9	22	12	21	27	28	17	11	15	19	29	24	25	26	13	23	1706
1707	2	20	10	0	7	1	3	4	16	18	5	6	8	14	9	22	12	21	27	29	17	11	15	19	28	24	25	26	13	23	1707
1708	1	20	10	0	8	2	3	4	16	17	6	5	7	14	9	21	11	22	27	29	18	12	15	19	28	23	26	25	13	24	1708
1709	1	20	10	0	8	2	3	4	16	17	6	5	7	14	9	21	11	22	27	28	18	12	15	19	29	23	26	25	13	24	1709
1710	2	19	10	0	8	1	3	4	16	17	6	5	7	13	9	21	11	22	28	27	18	12	15	20	29	23	26	25	14	24	1710
1711	2	19	11	0	8	1	3	4	16	17	6	5	7	13	9	21	10	22	29	27	18	12	14	20	28	23	26	25	15	24	1711
1712	1	19	11	0	8	2	3	4	16	17	6	5	7	13	9	21	10	22	29	28	18	12	14	20	27	23	26	25	15	24	1712
1713	1	19	10	0	8	2	3	4	16	17	7	5	6	13	9	21	11	23	29	28	18	12	15	20	26	22	27	25	14	24	1713
1714	2	19	9	0	8	1	3	4	16	17	7	5	6	14	10	21	11	23	29	27	18	12	15	20	26	22	28	25	13	24	1714
1715	2	19	9	1	8	0	3	4	17	16	6	5	7	14	10	21	11	22	29	26	18	12	15	20	27	23	28	25	13	24	1715
1716	2	19	9	1	7	0	3	4	17	16	5	6	8	13	10	22	11	21	29	26	18	12	15	20	28	23	27	25	14	24	1716
1717	2	19	9	0	7	1	3	4	17	16	5	6	8	13	10	22	11	21	29	27	18	12	15	20	28	23	26	25	14	24	1717
1718	1	19	9	0	8	2	3	4	17	16	6	5	7	14	10	21	11	22	29	27	18	12	15	20	28	23	25	26	13	24	1718
1719	0	19	8	1	9	2	3	4	17	16	7	5	6	14	11	21	10	23	29	26	18	13	15	20	28	22	25	27	12	24	1719
1720	0	19	8	2	9	1	3	4	17	15	7	5	6	14	11	21	10	23	29	25	18	13	16	20	28	22	26	27	12	24	1720
1721	1	19	9	2	8	0	3	4	17	15	6	5	7	14	10	21	11	22	28	25	18	12	16	20	29	23	27	26	13	24	1721
1722	2	19	9	1	8	0	3	4	17	16	6	5	7	14	10	22	11	21	28	26	18	12	15	20	29	24	27	25	13	23	1722
1723	2	19	9	0	8	1	3	4	16	17	7	5	6	14	10	22	11	21	28	27	18	12	15	20	29	24	26	25	13	23	1723
1724	1	19	9	0	8	2	3	4	16	17	7	5	6	13	10	22	11	21	28	27	18	12	15	20	29	24	25	26	14	23	1724
1725	1	19	9	0	8	2	3	4	16	17	6	5	7	13	10	22	11	21	29	27	18	12	15	20	28	24	25	26	14	23	1725
1726	1	19	9	0	8	2	3	4	16	17	6	5	7	13	10	21	11	22	29	27	18	12	15	20	28	24	26	25	14	23	1726
1727	0	19	9	1	8	2	3	4	16	17	7	5	6	12	11	21	10	23	29	26	18	13	15	20	28	24	27	25	14	22	1727
1728	0	19	9	1	8	2	3	4	16	17	7	5	6	12	11	21	10	23	29	25	18	14	15	20	28	24	27	26	13	22	1728
1729	1	19	9	0	8	2	3	4	16	17	6	5	7	13	10	21	11	22	28	25	18	14	15	20	29	24	26	27	12	23	1729
1730	1	19	9	0	8	2	3	4	16	17	6	5	7	13	10	21	11	22	28	26	18	14	15	20	29	24	25	27	12	23	1730
1731	0	18	9	1	8	2	3	4	17	16	7	5	6	12	10	21	11	22	29	27	19	14	15	20	28	24	25	26	13	23	1731
1732	0	18	9	1	7	2	3	4	17	16	8	6	5	12	10	21	11	22	29	27	19	13	15	20	28	23	25	26	14	24	1732
1733	1	18	9	0	7	2	3	4	16	17	8	6	5	13	11	21	10	22	29	27	19	12	15	20	28	23	24	26	14	25	1733
1734	1	18	9	0	8	2	3	4	16	17	7	5	6	13	11	21	10	22	29	27	19	12	15	20	28	23	24	26	14	25	1734
1735	0	18	9	1	8	2	3	4	17	16	7	5	6	13	10	21	11	23	28	26	19	12	15	20	29	22	24	27	14	25	1735
1736	0	18	9	2	7	1	3	4	17	16	8	6	5	13	10	22	11	23	28	26	20	12	15	19	29	21	24	27	14	25	1736
1737	1	19	9	2	7	0	3	4	16	17	8	6	5	13	11	23	10	22	29	27	20	12	14	18	28	21	25	26	15	24	1737
1738	2	19	9	1	8	0	3	4	16	17	7	5	6	13	11	23	10	21	29	27	20	12	14	18	28	22	26	25	15	24	1738
1739	2	19	9	0	8	1	3	4	17	16	6	5	7	13	10	22	11	21	29	27	20	12	15	18	28	23	26	25	14	24	1739
1740	1	19	9	0	8	2	3	4	17	16	5	6	7	13	10	21	11	22	29	27	20	12	15	18	28	23	25	26	14	24	1740
1741	0	19	9	1	8	2	3	4	17	16	5	6	7	13	11	21	10	22	28	27	20	12	15	18	29	23	25	26	14	24	1741
1742	0	20	9	1	8	2	3	4	17	16	6	5	7	13	11	21	10	22	28	27	19	12	15	18	29	23	25	26	14	24	1742
1743	1	20	9	0	8	2	3	4	16	17	7	5	6	13	10	21	11	23	29	26	18	12	14	19	28	22	25	27	15	24	1743
1744	1	20	9	0	8	2	3	4	16	17	7	5	6	13	10	21	12	23	29	26	18	11	14	19	28	22	25	27	15	24	1744
1745	0	20	8	1	9	3	2	4	17	16	6	5	7	12	11	21	13	22	28	27	19	10	15	18	29	23	24	26	14	25	1745
1746	0	20	8	1	9	3	2	4	17	16	6	5	7	12	11	22	13	21	28	27	19	10	15	18	29	23	24	26	14	25	1746
1747	1	20	9	0	8	2	3	4	16	17	7	5	6	13	10	23	12	21	28	26	18	11	14	19	29	22	25	27	15	24	1747
1748	1	20	9	0	8	2	3	4	16	17	7	5	6	13	10	23	12	21	28	26	18	11	14	19	29	22	25	27	15	24	1748
1749	1	20	9	0	8	2	3	4	16	17	6	5	7	13	10	22	12	21	28	27	19	11	15	18	29	23	24	26	14	25	1749
1750	2	20	10	0	8	1	3	4	16	17	5	6	7	13	9	21	11	22	28	27	19	12	15	18	29	23	24	25	14	26	1750
1751	2	20	10	0	8	1	3	4	16	17	5	6	7	13	9	21	11	22	28	27	19	12	15	18	29	23	24	25	14	26	1751
1752	1	20	9	0	8	2	4	3	16	18	6	5	7	14	10	22	12	21	28	27	19	11	15	17	29	23	24	26	13	25	1752
1753	1	20	9	0	8	2	4	3	16	18	6	5	7	14	10	22	12	21	28	27	19	11	15	17	29	23	24	26	13	25	1753
1754	2	20	9	0	8	1	3	4	16	17	5	6	7	13	10	21	12	22	28	27	19	11	15	18	29	23	24	25	14	26	1754
1755	2	20	9	0	8	1	3	4	16	17	5	6	7	13	10	21	12	22	28	27	19	11	15	18	29	23	24	25	14	26	1755
1756	2	20	9	0	8	1	3	4	16	17	5	6	7	13	10	21	12	22	28	27	19	11	15	18	29	23	24	26	14	25	1756
1757	2	20	9	0	8	1	3	4	16	17	5	6	7	13	10	21	12	23	28	26	19	11	15	18	29	22	24	27	14	25	1757
1758	2	20	9	0	8	1	3	4	16	17	5	6	7	13	10	22	11	23	28	26	19	12	15	18	29	21	24	27	14	25	1758
1759	2	20	9	1	8	0	3	4	16	17	5	7	6	13	10	23	11	22	28	27	19	12	15	18	29	21	24	26	14	25	1759
1760	1	20	9	2	8	0	3	4	16	18	5	7	6	14	10	24	12	21	28	27	19	11	15	17	29	22	23	25	13	26	1760
1761	0	20	8	2	9	1	3	4	16	18	5	6	7	14	11	24	12	21	28	26	19	10	15	17	29	22	23	25	13	27	1761
1762	0	20	8	1	9	2	3	4	16	17	5	6	7	13	11	24	12	22	28	25	19	10	15	18	29	21	23	26	14	27	1762
1763	1	20	9	0	8	2	3	4	16	17	5	7	6	13	10	24	12	23	28	25	19	11	14	18	29	21	22	27	15	26	1763
1764	1	20	9	0	8	2	3	4	16	18	5	7	6	13	10	24	12	23	28	26	19	11	14	17	29	21	22	27	15	25	1764
1765	1	20	9	0	8	2	3	4	17	18	5	6	7	12	10	24	13	22	28	27	19	11	15	16	29	21	23	26	14	25	1765
1766	1	20	9	0	7	2	3	4	18	17	5	6	8	12	10	23	14	21	28	27	19	11	15	16	29	22	24	25	13	26	1766
1767	0	20	9	1	7	2	3	4	18	16	5	6	8	12	10	23	14	21	28	26	19	11	15	17	29	22	24	25	13	27	1767
1768	0	20	9	1	8	2	3	4	17	16	5	6	7	12	10	23	13	22	28	25	19	11	15	18	29	21	24	26	14	27	1768
1769	1	20	9	0	8	2	3	4	16	17	5	7	6	13	10	23	12	22	28	25	19	11	14	18	29	21	24	27	15	26	1769
1770	1	20	9	0	8	2	3	4	16	17	5	7	6	13	10	23	12	22	28	26	19	11	14	18	29	21	24	27	15	25	1770
1771	1	20	9	0	8	2	3	4	16	17	5	6	7	13	10	23	12	22	28	27	19	11	15	18	29	21	24	26	14	25	1771
1772	1	20	10	0	8	2	3	4	16	17	5	6	7	13	9	24	11	22	28	27	19	12	15	18	29	21	23	25	14	26	1772
1773	0	20	10	1	8	2	3	4	16	17	5	7	6	13	9	24	11	22	28	26	18	12	15	19	29	21	23	25	14	27	1773
1774	0	20	10	1	8	2	3	4	16	17	5	7	6	13	9	23	12	22	28	25	18	11	15	19	29	21	24	26	14	27	1774
1775	1	20	10	0	8	2	3	4	17	16	5	6	7	12	9	22	13	23	28	25	19	11	14	18	29	21	24	27	15	26	1775
1776	1	20	10	0	7	2	3	4	17	16	5	6	8	12	9	22	13	24	28	25	19	11	14	18	29	21	23	27	15	26	1776
1777	1	20	10	0	7	2	3	4	16	17	5	6	8	13	9	23	12	24	28	25	19	11	15	18	29	21	22	26	14	27	1777
1778	2	20	10	0	8	1	3	4	16	17	5	6	7	14	9	23	12	24	28	25	19	11	15	18	29	21	22	26	13	27	1778
1779	2	20	10	0	8	1	3	4	16	17	5	6	7	14	9	22	12	24	28	25	19	11	15	18	29	21	23	27	13	26	1779
1780	1	20	9	0	7	2	3	4	15	18	6	5	8	13	10	22	11	23	28	26	19	12	16	17	29	21	24	27	14	25	1780
1781	1	20	9	0	7	2	3	4	15	18	6	5	8	13	10	23	11	22	28	27	19	12	16	17	29	21	24	26	14	25	1781
1782	2	20	9	0	8	1	3	4	15	17	5	6	7	13	10	24	11	22	28	27	19	12	16	18	29	21	23	25	14	26	1782
1783	2	20	9	0	8	1	3	4	15	17	5	6	7	13	10	24	11	22	29	26	19	12	16	18	28	21	23	25	14	27	1783
1784	2	20	9	0	8	1	3	4	15	17	5	6	7	13	10	24	11	22	29	26	19	12	16	18	28	21	23	25	14	27	1784
1785	2	20	9	0	8	1	3	4	15	17	5	6	7	13	10	24	11	22	28	26	18	12	16	19	29	21	23	25	14	27	1785
1786	1	20	9	0	7	2	3	4	16	17	5	6	8	13	10	23	12	22	28	26	18	11	15	19	29	21	24	25	14	27	1786
1787	1	20	9	0	7	2	3	4	16	17	5	6	8	13	10	23	12	22	29	27	19	11	15	18	28	21	24	25	14	26	1787
1788	1	20	9	0	8	2	3	4	16	17	5	6	7	14	10	24	11	22	29	27	19	12	15	18	28	21	23	25	13	26	1788
1789	1	20	9	0	8	2	3	4	16	17	5	6	7	14	10	24	11	22	29	26	18	12	15	19	28	21	23	25	13	27	1789
1790	1	20	9	0	8	2	3	4	16	17	5	6	7	13	10	23	12	21	29	26	18	11	15	19	28	22	24	25	14	27	1790
1791	1	20	9	0	8	2	3	4	16	17	5	6	7	13	10	22	12	21	29	27	18	11	14	19	28	23	24	25	15	26	1791
1792	2	20	9	0	7	1	3	4	16	18	5	6	8	14	10	21	11	22	29	27	17	12	13	19	28	23	24	26	15	25	1792
1793	2	20	9	0	7	1	3	4	16	18	5	6	8	14	10	21	11	23	29	26	17	12	13	19	28	22	24	27	15	25	1793
1794	1	20	9	0	8	2	3	4	16	17	6	5	7	13	10	22	12	23	29	25	18	11	14	19	28	21	24	27	15	26	1794
1795	1	20	9	0	8	2	3	4	16	17	6	5	7	13	10	23	12	22	28	25	18	11	15	19	29	21	24	26	14	27	1795
1796	1	20	9	0	8	2	3	4	16	17	5	6	7	14	10	23	11	22	28	26	18	12	15	19	29	21	24	25	13	27	1796
1797	1	20	9	0	8	2	3	4	16	17	5	6	7	15	10	23	11	22	28	27	18	12	14	19	29	21	24	25	13	26	1797
1798	2	20	9	0	8	1	3	4	16	17	6	5	7	15	10	24	11	21	28	27	18	12	14	19	29	22	23	26	13	25	1798
1799	2	20	8	0	9	1	3	4	16	17	6	5	7	14	11	25	10	21	28	26	19	12	15	18	29	22	23	27	13	24	1799
1800	1	20	8	0	9	2	3	4	16	17	5	6	7	14	11	25	10	22	28	26	19	12	15	18	29	21	23	27	13	24	1800
1801	1	20	9	0	8	2	3	4	16	17	5	6	7	14	11	24	10	22	28	27	18	12	15	19	29	21	23	26	13	25	1801
1802	2	20	9	0	7	1	4	3	16	18	6	5	8	13	12	23	10	21	28	27	17	11	15	19	29	22	24	25	14	26	1802
1803	2	20	9	0	7	1	4	3	16	18	6	5	8	13	12	23	10	21	28	27	17	11	15	19	29	22	24	25	14	26	1803
1804	1	20	9	0	8	2	3	4	16	17	5	6	7	14	11	23	10	22	28	27	18	12	15	19	29	21	24	26	13	25	1804
1805	0	21	9	1	8	2	3	4	16	17	5	6	7	15	10	23	11	22	28	27	18	12	14	19	29	20	25	26	13	24	1805
1806	0	22	9	2	7	1	4	3	16	17	6	5	8	15	10	24	12	21	28	27	18	11	13	19	29	20	26	25	14	23	1806
1807	0	22	9	2	7	1	4	3	17	16	6	5	8	15	11	24	12	21	29	27	18	10	13	19	28	20	26	25	14	23	1807
1808	0	21	9	1	8	2	3	4	17	16	5	6	7	15	11	23	12	22	29	27	18	10	14	19	28	20	26	25	13	24	1808
1809	1	20	8	0	9	2	3	4	16	17	5	7	6	14	10	22	13	23	28	26	19	11	15	18	29	21	27	24	12	25	1809
1810	2	20	8	0	9	1	4	3	16	17	6	7	5	14	10	21	13	23	28	25	19	11	15	18	29	22	27	24	12	26	1810
1811	2	21	9	1	8	0	4	3	17	16	7	6	5	15	11	20	12	22	28	24	18	10	14	19	29	23	26	25	13	27	1811
1812	2	21	9	1	8	0	3	4	17	16	7	5	6	15	11	20	12	22	28	24	18	10	14	19	29	23	26	25	13	27	1812
1813	2	20	9	0	8	1	3	4	16	17	6	5	7	14	10	21	12	23	29	25	18	11	15	19	28	22	27	24	13	26	1813
1814	1	20	9	0	7	2	3	4	16	17	6	5	8	13	10	22	11	23	29	26	18	12	15	19	28	21	27	24	14	25	1814
1815	1	20	9	0	6	2	3	4	16	17	7	5	8	13	11	22	10	23	28	27	19	12	15	18	29	21	26	24	14	25	1815
1816	1	20	9	0	6	2	3	4	15	17	7	5	8	13	11	22	10	23	28	27	19	12	16	18	29	21	26	24	14	25	1816
1817	1	20	9	0	6	2	3	4	15	17	7	5	8	13	11	22	10	23	29	26	19	12	16	18	28	21	27	25	14	24	1817
1818	1	20	9	0	6	2	3	4	16	17	8	5	7	14	11	22	10	23	29	26	19	12	15	18	28	21	27	25	13	24	1818
1819	1	20	9	0	6	2	3	4	16	17	8	5	7	14	11	22	10	23	28	26	19	12	15	18	29	21	27	25	13	24	1819
1820	1	20	9	0	6	2	3	4	16	17	7	5	8	13	11	22	10	23	28	26	19	12	15	18	29	21	27	25	14	24	1820
1821	0	20	9	1	6	2	3	4	16	17	7	5	8	13	11	22	10	23	29	27	19	12	15	18	28	21	26	25	14	24	1821
1822	0	20	9	1	6	2	3	4	16	17	8	5	7	13	11	22	10	24	29	27	19	12	15	18	28	21	26	25	14	23	1822
1823	1	21	9	0	6	2	3	4	16	17	8	5	7	13	10	23	11	24	28	26	19	12	14	18	29	20	27	25	15	22	1823
1824	2	22	9	0	6	1	3	4	16	18	7	5	8	14	10	24	11	23	28	25	19	12	13	17	29	20	27	26	15	21	1824
1825	2	22	9	0	6	1	3	4	16	18	7	5	8	15	11	24	10	23	29	25	19	12	13	17	28	20	27	26	14	21	1825
1826	1	21	9	0	5	2	3	4	16	18	8	6	7	15	11	23	10	24	29	26	19	12	14	17	28	20	27	25	13	22	1826
1827	0	20	9	1	5	2	3	4	16	18	8	6	7	14	10	22	11	24	29	27	19	12	15	17	28	21	26	25	13	23	1827
1828	0	20	9	1	6	2	3	4	16	18	8	5	7	13	10	22	11	24	29	27	19	12	15	17	28	21	26	25	14	23	1828
1829	1	21	8	0	7	2	3	4	16	18	9	5	6	12	11	23	10	25	29	26	19	13	14	17	28	20	27	24	15	22	1829
1830	2	22	8	0	7	1	3	4	15	18	9	5	6	12	11	23	10	25	29	26	19	13	14	17	28	20	27	24	16	21	1830
1831	2	22	9	1	6	0	3	4	14	18	8	5	7	13	10	23	11	24	29	27	19	12	15	17	28	20	26	25	16	21	1831
1832	1	21	9	2	5	0	3	4	13	17	7	6	8	14	10	24	12	23	29	27	19	11	15	18	28	20	25	26	16	22	1832
1833	0	20	8	2	5	1	3	4	13	17	7	6	9	15	10	24	12	22	28	26	19	11	14	18	29	21	25	27	16	23	1833
1834	0	20	8	1	5	2	3	4	14	18	7	6	9	16	10	24	11	22	28	26	19	12	13	17	29	21	25	27	15	23	1834
1835	1	21	9	0	5	2	3	4	15	18	7	6	8	16	10	24	11	23	29	27	19	12	13	17	28	20	25	26	14	22	1835
1836	2	22	10	0	6	1	4	3	16	17	8	5	7	15	9	23	12	24	29	27	20	11	14	18	28	19	26	25	13	21	1836
1837	2	22	10	1	6	0	4	3	16	17	8	5	7	14	9	23	12	24	28	26	20	11	15	18	29	19	27	25	13	21	1837
1838	1	21	9	2	5	0	3	4	16	18	7	6	8	14	10	24	11	23	28	25	19	12	15	17	29	20	27	26	13	22	1838
1839	0	21	8	2	5	1	3	4	16	18	7	6	9	15	10	24	11	22	28	25	19	12	14	17	29	20	26	27	13	23	1839
1840	0	21	7	1	5	2	3	4	16	18	8	6	9	15	10	24	12	22	28	26	19	11	14	17	29	20	25	27	13	23	1840
1841	1	21	7	0	5	2	3	4	16	18	8	6	9	15	10	24	12	23	28	27	19	11	14	17	29	20	25	26	13	22	1841
1842	2	22	8	0	5	1	4	3	16	17	7	6	9	15	10	23	11	24	28	27	20	12	13	18	29	19	26	25	14	21	1842
1843	2	22	9	0	5	1	4	3	16	17	7	6	8	15	10	23	11	24	29	26	20	12	13	18	28	19	27	25	14	21	1843
1844	1	21	9	0	5	2	3	4	16	18	7	6	8	15	10	24	11	23	29	26	20	12	13	17	28	19	27	25	14	22	1844
1845	0	21	8	1	5	2	3	4	17	18	7	6	9	14	10	24	11	22	29	27	20	12	13	16	28	19	26	25	15	23	1845
1846	0	21	7	1	5	2	4	3	17	18	8	6	9	13	10	24	11	22	29	27	20	12	14	16	28	19	26	25	15	23	1846
1847	1	21	7	0	5	2	4	3	16	18	9	6	8	13	10	24	11	23	28	26	20	12	14	17	29	19	27	25	15	22	1847
1848	1	22	8	0	5	2	3	4	16	18	9	6	7	14	10	24	12	23	28	25	19	11	13	17	29	20	27	26	15	21	1848
1849	0	23	9	1	5	2	3	4	16	18	8	6	7	14	10	24	12	22	28	25	19	11	13	17	29	20	26	27	15	21	1849
1850	0	23	9	1	5	2	4	3	16	18	7	6	8	13	10	24	11	22	28	26	19	12	14	17	29	20	25	27	15	21	1850
1851	1	22	8	0	5	2	4	3	16	19	6	7	9	13	10	24	11	23	28	27	18	12	14	17	29	21	25	26	15	20	1851
1852	1	22	8	0	5	2	3	4	16	19	6	7	9	14	10	24	12	23	28	27	18	11	13	17	29	21	26	25	15	20	1852
1853	1	23	8	0	5	2	3	4	16	18	7	6	9	14	10	24	12	22	29	26	19	11	13	17	28	20	27	25	15	21	1853
1854	1	23	8	0	5	2	4	3	16	18	7	6	9	13	10	24	11	21	29	25	19	12	14	17	28	20	27	26	15	22	1854
1855	0	22	8	1	4	2	5	3	17	19	7	6	9	12	11	25	10	20	28	24	18	13	14	16	29	21	26	27	15	23	1855
1856	0	21	8	2	4	1	5	3	17	19	7	6	9	12	11	25	10	20	28	24	18	13	14	15	29	22	26	27	16	23	1856
1857	1	21	8	2	5	0	4	3	17	18	7	6	9	13	10	24	11	20	29	25	19	12	14	15	28	23	27	26	16	22	1857
1858	2	22	8	1	5	0	4	3	17	18	7	6	9	14	10	24	11	20	29	26	19	12	13	16	28	23	27	25	15	21	1858
1859	2	23	9	0	4	1	5	3	16	19	6	7	8	14	10	25	11	20	28	27	18	13	12	17	29	22	26	24	15	21	1859
1860	1	23	9	0	4	2	5	3	16	19	6	7	8	14	10	25	11	20	28	27	18	13	12	17	29	21	26	24	15	22	1860
1861	0	23	8	1	5	2	4	3	17	18	6	7	9	14	10	24	11	20	28	26	19	12	13	16	29	21	27	25	15	22	1861
1862	0	23	8	2	5	1	3	4	17	18	6	7	9	13	10	24	12	20	28	26	19	11	14	15	29	21	27	25	16	22	1862
1863	1	22	9	2	5	0	3	4	17	19	7	6	8	13	10	24	12	21	28	27	18	11	14	15	29	20	26	25	16	23	1863
1864	2	21	9	1	5	0	4	3	17	19	7	6	8	14	10	24	11	22	28	27	18	12	13	16	29	20	25	26	15	23	1864
1865	2	21	8	0	5	1	4	3	17	18	6	7	9	14	10	24	11	22	28	27	19	12	13	16	29	20	25	26	15	23	1865
1866	1	22	8	0	5	2	4	3	17	18	6	7	9	14	10	24	11	21	28	27	19	12	13	16	29	20	26	25	15	23	1866
1867	1	23	9	0	5	2	4	3	17	19	7	6	8	15	10	25	11	20	28	26	18	12	13	16	29	21	27	24	14	22	1867
1868	1	23	9	0	5	2	4	3	17	19	7	6	8	15	10	25	11	20	28	26	18	12	13	16	29	21	27	24	14	22	1868
1869	0	23	9	1	5	2	4	3	17	19	7	6	8	14	10	25	11	21	28	27	18	12	13	16	29	20	26	24	15	22	1869
1870	0	23	9	1	5	2	4	3	17	19	8	6	7	14	10	26	12	21	27	28	18	11	13	16	29	20	25	24	15	22	1870
1871	1	22	9	0	5	2	4	3	16	18	8	6	7	15	10	26	12	20	27	28	19	11	13	17	29	21	25	24	14	23	1871
1872	1	22	9	0	5	2	4	3	16	18	7	6	8	15	10	25	11	20	27	28	19	12	13	17	29	21	26	24	14	23	1872
1873	0	23	8	1	5	2	4	3	17	19	7	6	9	14	11	24	10	21	26	28	18	13	12	16	29	20	27	25	15	22	1873
1874	0	23	8	2	5	1	4	3	17	19	7	6	9	14	11	24	10	21	26	28	18	13	12	16	29	20	27	25	15	22	1874
1875	0	22	8	2	5	1	4	3	17	19	7	6	9	15	11	24	10	21	27	28	18	12	13	16	29	20	26	25	14	23	1875
1876	0	21	7	1	6	2	3	4	18	19	8	5	10	15	12	24	9	22	27	28	17	11	13	16	29	20	25	26	14	23	1876
1877	1	21	7	0	6	2	3	4	18	19	8	5	10	14	12	24	9	22	26	28	17	11	13	16	29	20	25	27	15	23	1877
1878	2	22	8	0	5	1	4	3	18	19	7	6	9	14	11	24	10	21	25	27	17	12	13	16	29	20	26	28	15	23	1878
1879	2	23	8	1	5	0	4	3	19	18	6	7	9	15	10	24	11	20	25	26	16	12	13	17	29	21	27	28	14	22	1879
1880	1	23	8	2	5	0	3	4	19	18	6	7	9	15	10	24	12	20	25	26	16	11	13	17	29	21	27	28	14	22	1880
1881	0	22	8	2	5	1	3	4	18	19	7	6	9	14	10	24	12	21	25	27	16	11	13	17	29	20	26	28	15	23	1881
1882	0	22	8	1	5	2	4	3	17	19	7	6	9	14	10	24	11	21	26	28	16	12	13	18	29	20	25	27	15	23	1882
1883	1	23	8	0	5	2	4	3	17	19	7	6	9	15	10	24	11	21	27	28	16	12	13	18	29	20	25	26	14	22	1883
1884	2	24	7	0	6	1	3	4	18	19	8	5	10	15	9	23	12	22	27	28	16	11	14	17	29	20	26	25	13	21	1884
1885	2	24	7	0	6	1	3	4	19	18	8	5	10	15	9	23	12	22	27	28	16	11	14	17	29	20	26	25	13	21	1885
1886	1	23	8	0	5	2	4	3	19	18	7	6	9	15	10	24	11	21	27	28	16	12	13	17	29	20	25	26	14	22	1886
1887	0	22	8	1	5	2	4	3	18	19	6	7	9	15	10	24	11	20	26	29	16	12	13	17	28	21	25	27	14	23	1887
1888	0	22	8	1	5	2	4	3	18	19	6	7	9	15	10	24	11	20	26	29	16	12	13	17	28	21	25	27	14	23	1888
1889	0	23	8	1	5	2	4	3	18	19	7	6	9	15	10	24	11	21	26	29	16	12	13	17	28	20	25	27	14	22	1889
1890	0	24	7	2	5	1	3	4	17	19	8	6	10	15	9	23	12	22	25	29	16	11	14	18	27	20	26	28	13	21	1890
1891	1	24	7	2	5	0	3	4	17	19	8	6	10	15	9	23	12	22	25	29	16	11	14	18	27	20	26	28	13	21	1891
1892	2	24	8	1	5	0	4	3	18	19	7	6	9	15	10	23	11	21	26	29	16	12	13	17	27	20	25	28	14	22	1892
1893	2	24	8	0	5	1	4	3	18	19	7	6	9	15	10	22	11	21	26	29	16	12	13	17	27	20	25	28	14	23	1893
1894	1	23	8	0	5	2	4	3	18	19	7	6	9	15	10	22	11	21	26	29	16	12	14	17	28	20	25	27	13	24	1894
1895	0	22	8	1	5	2	4	3	18	19	6	7	9	14	10	23	11	21	26	28	17	12	15	16	29	20	25	27	13	24	1895
1896	0	21	8	2	5	1	3	4	17	19	6	7	10	14	9	23	11	22	26	27	18	12	15	16	29	20	25	28	13	24	1896
1897	1	21	8	2	5	0	3	4	16	19	7	6	10	15	9	22	11	23	27	26	18	12	14	17	28	20	25	29	13	24	1897
1898	1	21	8	2	6	0	4	3	16	19	7	5	9	15	10	22	11	23	27	26	18	12	14	17	28	20	25	29	13	24	1898
1899	0	21	8	2	6	1	4	3	17	19	7	5	9	15	10	23	11	22	26	27	18	12	14	16	29	20	25	28	13	24	1899
1900	0	22	8	1	5	2	3	4	18	19	7	6	9	15	10	23	11	21	25	28	17	12	14	16	29	20	26	27	13	24	1900
1901	1	23	8	0	5	2	3	4	18	19	6	7	9	14	10	22	11	21	25	29	16	13	15	17	28	20	26	27	12	24	1901
1902	1	23	7	0	5	2	3	4	18	19	6	8	9	14	10	21	11	22	26	29	16	13	15	17	28	20	25	27	12	24	1902
1903	0	23	7	1	5	2	3	4	18	19	6	8	9	15	10	21	11	22	26	28	17	12	14	16	29	20	25	27	13	24	1903
1904	0	23	8	2	5	1	3	4	17	19	6	7	9	16	10	21	11	22	26	28	18	12	14	15	29	20	25	27	13	24	1904
1905	1	23	8	2	5	0	3	4	17	18	6	7	9	16	11	21	10	22	26	29	19	13	14	15	28	20	25	27	12	24	1905
1906	2	24	7	1	5	0	4	3	17	18	6	8	9	16	11	22	10	21	26	29	19	13	14	15	28	20	25	27	12	23	1906
1907	2	24	6	0	5	1	4	3	17	18	7	8	9	16	10	23	11	21	27	28	19	12	14	15	29	20	25	26	13	22	1907
1908	1	24	6	0	5	2	3	4	17	18	7	8	9	16	10	23	11	21	27	28	19	12	14	15	29	20	25	26	13	22	1908
1909	0	24	7	1	5	2	3	4	17	18	6	9	8	16	11	22	10	20	26	29	19	13	14	15	28	21	25	27	12	23	1909
1910	0	24	7	2	5	1	4	3	17	18	6	9	8	16	11	22	10	20	26	29	19	14	13	15	28	21	25	27	12	23	1910
1911	0	24	7	2	5	1	4	3	16	18	6	8	9	17	11	22	10	21	27	29	19	14	13	15	28	20	25	26	12	23	1911
1912	0	24	8	2	5	1	4	3	15	18	6	7	9	17	11	21	10	22	27	29	19	13	14	16	28	20	25	26	12	23	1912
1913	0	24	8	2	5	1	4	3	15	18	6	7	9	17	11	21	10	23	27	28	19	13	14	16	29	20	25	26	12	22	1913
1914	0	24	7	1	5	2	4	3	15	18	6	8	9	17	11	22	10	23	27	28	19	14	13	16	29	20	26	25	12	21	1914
1915	0	24	6	1	5	2	4	3	15	18	7	8	9	17	11	22	10	23	27	29	19	14	13	16	28	20	26	25	12	21	1915
1916	0	24	6	2	5	1	4	3	15	18	7	8	9	17	11	22	10	23	27	29	19	13	14	16	28	20	25	26	12	21	1916
1917	0	24	7	2	5	1	4	3	15	18	6	8	9	16	10	23	11	22	26	29	19	12	14	17	28	21	25	27	13	20	1917
1918	0	23	8	1	5	2	3	4	16	18	6	7	9	15	10	24	11	21	25	29	19	12	13	17	28	22	26	27	14	20	1918
1919	0	23	8	1	5	2	3	4	16	18	6	7	9	15	11	24	10	21	25	29	19	12	13	17	28	22	27	26	14	20	1919
1920	0	24	7	2	5	1	4	3	15	18	6	8	9	16	11	23	10	22	26	29	19	12	14	17	28	21	27	25	13	20	1920
1921	0	24	7	2	5	1	4	3	15	18	6	9	8	17	11	22	10	23	27	29	19	13	14	16	28	21	26	25	12	20	1921
1922	0	24	7	1	5	2	3	4	15	18	6	9	8	17	11	21	10	23	27	29	19	13	14	16	28	22	25	26	12	20	1922
1923	1	25	6	0	5	2	3	4	15	18	7	8	9	16	10	21	11	22	26	29	19	12	14	17	28	23	24	27	13	20	1923
1924	1	25	6	0	5	2	4	3	16	18	7	8	9	15	10	22	11	21	26	29	19	12	14	17	28	23	24	27	13	20	1924
1925	0	24	7	1	5	2	4	3	16	18	6	9	8	15	11	23	10	21	26	29	19	13	14	17	28	22	25	27	12	20	1925
1926	0	24	7	1	5	2	3	4	16	18	6	9	8	15	11	23	10	22	26	29	19	13	14	17	28	21	25	27	12	20	1926
1927	0	24	6	1	5	2	3	4	16	18	7	9	8	15	10	22	11	23	27	29	19	13	14	17	28	21	25	26	12	20	1927
1928	0	24	6	2	5	1	4	3	16	18	7	9	8	15	10	22	11	23	27	29	19	13	14	17	28	21	25	26	12	20	1928
1929	1	24	7	2	5	0	4	3	17	18	6	9	8	15	11	23	10	22	26	28	19	12	14	16	29	20	25	27	13	21	1929
1930	1	24	8	2	5	0	3	4	17	18	6	9	7	15	11	23	10	22	26	28	19	12	14	16	29	20	25	27	13	21	1930
1931	0	24	9	2	5	1	3	4	17	18	7	8	6	15	11	22	10	23	26	29	19	13	14	16	28	21	25	27	12	20	1931
1932	0	23	9	1	5	2	4	3	18	17	8	7	6	16	12	21	10	24	25	29	19	14	13	15	28	22	26	27	11	20	1932
1933	0	23	8	1	5	2	4	3	18	17	9	7	6	16	12	21	10	24	25	28	19	14	13	15	29	22	27	26	11	20	1933
1934	0	24	7	1	5	2	3	4	17	18	9	8	6	15	11	22	10	23	25	28	19	13	14	16	29	21	27	26	12	20	1934
1935	0	24	7	1	5	2	3	4	17	18	8	9	6	15	11	23	10	22	25	29	19	13	14	16	28	21	26	27	12	20	1935
1936	0	24	8	1	5	2	3	4	17	18	7	9	6	15	11	23	10	22	26	29	19	14	13	16	28	21	25	27	12	20	1936
1937	0	24	8	1	5	2	3	4	17	18	6	9	7	15	11	22	10	23	27	28	19	14	13	16	29	21	25	26	12	20	1937
1938	0	24	8	2	5	1	3	4	17	18	6	9	7	15	11	21	10	23	27	28	19	13	14	16	29	22	25	26	12	20	1938
1939	1	24	9	2	5	0	3	4	17	18	6	8	7	15	11	21	10	23	26	28	19	13	14	16	29	22	25	27	12	20	1939
1940	1	24	9	2	5	0	4	3	17	18	6	8	7	15	12	22	10	23	25	28	20	14	13	16	29	21	26	27	11	19	1940
1941	0	24	9	2	5	1	4	3	17	18	7	8	6	15	12	22	10	23	25	28	20	14	13	16	29	21	27	26	11	19	1941
1942	0	24	9	1	5	2	4	3	17	18	8	7	6	15	11	22	10	23	26	28	19	14	13	16	29	21	27	25	12	20	1942
1943	1	25	8	0	5	2	4	3	16	18	9	6	7	14	10	23	11	22	27	28	19	15	12	17	29	20	26	24	13	21	1943
1944	1	25	8	0	5	2	4	3	16	18	9	6	7	14	10	23	11	22	27	28	19	15	12	17	29	20	26	24	13	21	1944
1945	0	24	9	1	5	2	4	3	17	18	8	7	6	15	11	22	10	23	26	28	19	14	13	16	29	21	27	25	12	20	1945
1946	0	24	9	2	5	1	4	3	17	18	7	8	6	15	11	22	10	23	26	28	19	14	13	16	29	21	27	25	12	20	1946
1947	1	24	9	2	5	0	4	3	17	19	6	8	7	14	10	23	11	22	27	29	18	15	12	16	28	20	26	25	13	21	1947
1948	1	24	9	2	5	0	4	3	17	19	6	8	7	14	10	23	11	22	27	29	18	15	12	16	28	20	26	25	13	21	1948
1949	1	24	9	2	5	0	4	3	17	19	7	8	6	15	11	22	10	23	26	28	18	14	13	16	29	20	27	25	12	21	1949
1950	2	23	10	1	5	0	4	3	17	19	7	8	6	15	12	22	9	24	26	28	18	14	13	16	29	20	27	25	11	21	1950
1951	2	23	10	1	5	0	4	3	17	18	7	8	6	14	12	22	9	24	26	28	19	15	13	16	29	20	27	25	11	21	1951
1952	1	24	10	2	5	0	3	4	17	18	8	7	6	14	11	22	9	23	25	27	19	15	13	16	29	20	28	26	12	21	1952
1953	0	24	10	2	5	1	3	4	17	19	8	7	6	15	11	22	9	23	25	27	18	14	13	16	29	20	28	26	12	21	1953
1954	0	23	10	1	5	2	4	3	17	19	7	8	6	15	12	21	9	24	26	27	18	14	13	16	29	20	28	25	11	22	1954
1955	1	23	10	0	5	2	4	3	17	19	7	9	6	14	12	21	8	24	27	26	18	15	13	16	29	20	28	25	11	22	1955
1956	1	23	10	0	5	2	3	4	17	19	7	9	6	14	11	22	8	24	27	26	18	15	13	16	29	20	28	25	12	21	1956
1957	1	22	10	0	5	2	3	4	17	19	7	8	6	15	11	23	9	24	26	27	18	14	13	16	29	20	28	25	12	21	1957
1958	2	22	9	0	5	1	4	3	17	19	7	8	6	15	12	23	10	24	25	28	18	14	13	16	29	20	27	26	11	21	1958
1959	2	23	9	0	5	1	4	3	16	18	6	8	7	14	12	22	10	24	25	28	19	15	13	17	29	20	27	26	11	21	1959
1960	1	23	10	0	5	2	3	4	16	18	6	7	8	14	11	22	9	24	26	27	19	15	13	17	29	20	28	25	12	21	1960
1961	0	23	10	1	5	2	3	4	17	18	6	7	8	14	11	22	9	24	26	27	19	15	13	16	29	20	28	25	12	21	1961
1962	0	23	9	1	5	2	3	4	17	18	6	8	7	14	11	22	10	24	26	28	19	15	13	16	29	20	27	25	12	21	1962
1963	0	23	9	1	5	2	3	4	17	18	6	8	7	14	11	22	10	24	26	28	19	15	13	16	29	20	27	25	12	21	1963
1964	0	23	10	1	5	2	3	4	17	18	6	8	7	14	11	22	9	24	25	28	19	15	13	16	29	20	27	26	12	21	1964
1965	1	23	10	0	5	2	3	4	16	18	7	8	6	14	11	22	9	24	25	28	19	15	13	17	29	21	27	26	12	20	1965
1966	1	23	9	0	5	2	4	3	16	18	7	8	6	14	11	22	10	24	25	28	19	15	13	17	29	21	27	26	12	20	1966
1967	0	22	9	1	5	2	4	3	16	18	7	8	6	15	11	23	10	24	25	28	19	14	13	17	29	20	27	26	12	21	1967
1968	0	22	10	2	5	1	3	4	16	18	7	8	6	15	12	23	9	24	26	27	19	13	14	17	29	20	28	25	11	21	1968
1969	0	23	10	2	5	1	3	4	16	18	7	9	6	15	12	22	8	24	26	27	19	13	14	17	29	21	28	25	11	20	1969
1970	0	23	9	1	5	2	4	3	16	18	7	10	6	15	11	22	8	24	25	27	19	14	13	17	29	21	28	26	12	20	1970
1971	0	23	8	1	5	2	4	3	16	19	7	10	6	15	11	22	9	24	25	27	18	14	13	17	29	21	28	26	12	20	1971
1972	0	23	8	1	5	2	4	3	16	19	7	10	6	15	11	22	9	24	25	28	18	14	13	17	29	21	27	26	12	20	1972
1973	0	23	9	1	5	2	4	3	16	18	7	10	6	15	11	22	8	24	25	28	19	14	13	17	29	21	27	26	12	20	1973
1974	0	23	9	1	5	2	4	3	16	18	7	10	6	15	11	22	8	24	25	28	19	14	13	17	29	21	27	26	12	20	1974
1975	1	22	8	0	5	2	4	3	16	18	7	10	6	15	11	23	9	25	24	28	19	14	12	17	29	20	26	27	13	21	1975
1976	1	22	8	0	5	2	3	4	16	17	7	10	6	15	11	23	9	25	24	27	19	14	12	18	29	20	26	28	13	21	1976
1977	0	23	9	1	5	2	3	4	17	16	7	10	6	15	11	22	8	24	25	26	19	14	13	18	29	20	27	28	12	21	1977
1978	0	23	9	1	5	2	4	3	18	16	7	10	6	15	11	21	8	24	25	26	19	13	14	17	29	20	28	27	12	22	1978
1979	0	23	9	1	5	2	4	3	18	16	7	10	6	15	11	21	8	25	24	27	19	13	14	17	29	20	28	26	12	22	1979
1980	0	23	9	1	5	2	4	3	17	16	7	10	6	15	11	22	8	25	24	28	19	14	13	18	29	20	27	26	12	21	1980
1981	1	22	9	0	5	2	4	3	17	16	7	10	6	14	11	23	8	24	25	28	19	15	13	18	29	20	26	27	12	21	1981
1982	1	22	9	0	5	2	4	3	17	16	8	10	6	14	11	23	7	24	26	28	19	15	13	18	29	20	25	27	12	21	1982
1983	0	23	8	1	5	2	4	3	16	17	9	10	6	15	11	22	7	24	27	28	19	14	13	18	29	20	25	26	12	21	1983
1984	0	23	7	1	5	2	4	3	16	17	9	10	6	15	12	22	8	24	27	28	19	14	13	18	29	20	26	25	11	21	1984
1985	0	23	7	1	5	2	4	3	17	16	9	10	6	15	12	22	8	24	26	28	19	14	13	18	29	20	27	25	11	21	1985
1986	0	23	7	1	5	2	3	4	17	16	9	10	6	15	11	22	8	24	25	28	19	14	13	18	29	20	27	26	12	21	1986
1987	1	22	7	0	5	2	3	4	17	16	9	10	6	14	11	23	8	24	25	28	19	15	13	18	29	20	26	27	12	21	1987
1988	1	22	7	0	5	2	4	3	17	16	9	10	6	14	11	23	8	24	26	27	19	15	13	18	29	20	25	28	12	21	1988
1989	0	23	7	1	5	2	4	3	16	17	8	10	6	15	11	22	9	24	26	27	19	14	13	18	29	20	25	28	12	21	1989
1990	0	24	8	2	6	1	3	4	15	18	7	9	5	16	12	21	10	23	25	28	20	13	14	17	29	19	26	27	11	22	1990
1991	1	24	8	2	6	0	3	4	15	18	7	9	5	16	12	21	10	23	25	28	20	13	14	17	29	19	27	26	11	22	1991
1992	2	23	7	1	5	0	4	3	16	17	8	10	6	15	11	22	9	24	25	28	20	14	13	18	29	19	27	26	12	21	1992
1993	2	23	7	0	5	1	4	3	17	16	9	10	6	14	11	22	8	24	25	28	20	15	13	18	29	19	26	27	12	21	1993
1994	1	24	8	0	6	2	3	4	18	16	10	9	5	13	12	21	7	23	26	27	19	15	14	17	29	20	25	28	11	22	1994
1995	0	24	8	1	6	2	3	4	18	16	10	9	5	13	12	21	7	23	26	27	19	15	14	17	29	20	25	28	11	22	1995
1996	0	23	7	1	5	2	4	3	17	16	9	10	6	14	11	22	8	24	25	27	19	15	13	18	29	20	26	28	12	21	1996
1997	1	23	7	0	5	2	4	3	16	17	9	10	6	15	11	22	8	25	24	26	19	14	13	18	29	20	27	28	12	21	1997
1998	1	23	8	0	5	2	4	3	16	18	10	9	6	15	12	22	7	25	24	26	20	14	13	17	29	19	27	28	11	21	1998
[truncated: 3,842 more rows]
