# Supplementary material for: Energy coupling and stoichiometry of Zn2+/H+ antiport by the prokaryotic cation diffusion facilitator YiiP
Source: eLife. 2023 Oct 31;12:RP87167. doi: 10.7554/eLife.87167 (PMC10617992; doi:10.7554/eLife.87167)
Supplement: Figure 4—figure supplement 4—source data 1. [file elife-87167-fig4-figsupp4-data1.csv]

pH	resid: 47A	resid: 51A	resid: 70A	resid: 73A	resid: 77A	resid: 155A	resid: 159A	resid: 47B	resid: 51B	resid: 70B	resid: 73B	resid: 77B	resid: 155B	resid: 159B
1.5	0.004160166	0	0	0.039598779	0.132275132	0.422900763	0	0.163294035	0.001206833	0	0	0.011051345	0.027177177	0.002441315
1.75	0.008484955	0	0	0.054187627	0.220600018	0.641824957	0	0.338936322	9.27E-05	9.32E-05	0	0.00854449	0.014844596	0.007928926
2	0.023076923	0	0	0.101669196	0.332021467	0.786315404	0	0.472985021	0	9.28E-05	0	0.010918929	0.016516308	0.010623913
2.5	0.114365901	0.000257422	0	0.24490532	0.415096025	0.687032646	9.19E-05	0.56151363	0.00018498	0.000466505	0	0.032655039	0.027645475	0.051970773
2.75	0.070931245	0.003621939	0	0.255025126	0.444804027	0.735747514	9.21E-05	0.582540976	0.002965434	0.000747175	0	0.068355688	0.039524903	0.081255028
3	0.083617897	0.013350672	0	0.244002497	0.529634641	0.869234296	0.000184315	0.66928778	0.001670999	0.001213252	0	0.119564131	0.073111043	0.10469638
3.25	0.092435505	0.013924926	0	0.37417488	0.576580669	0.900777321	0.000552283	0.774632553	0.000185718	0.001306945	0	0.181148451	0.14335881	0.147978945
3.5	0.112851019	0.011153381	0	0.460330503	0.642182677	0.937568656	0.001109365	0.879894132	0.0002785	0.001588934	0	0.246041413	0.287235142	0.223380567
3.75	0.1642945	0.003702747	0	0.432474274	0.629045417	0.949196141	0.00295858	0.802810475	0.003620162	0.00130658	0	0.299144429	0.424589656	0.31990306
4	0.245114511	0.004649561	0	0.502816645	0.638051889	0.923450678	0.007688033	0.823293904	0.003249768	0.002073516	0	0.406572295	0.586031358	0.447705497
4.25	0.362489866	0.006202619	0	0.585312185	0.712139149	0.971234262	0.015952513	0.830503834	0.004178661	0.002641759	0	0.545418127	0.616167725	0.574266411
4.5	0.507002546	0.005504903	0	0.603215672	0.804516778	0.994020789	0.007409466	0.848761766	0.003068055	0.003880738	0	0.66053129	0.679770762	0.640671073
4.75	0.597194019	0.013885295	0	0.643231321	0.835469694	0.999265988	0.007243685	0.920161143	0.003531599	0.012646101	8.62E-05	0.767215717	0.743703405	0.74664933
5	0.66037563	0.011100512	0	0.719729905	0.879402054	0.999908366	0.009568045	0.962586901	0.003554392	0.018849779	8.61E-05	0.840054682	0.779413268	0.816487526
5.25	0.648796499	0.009290614	0	0.767966574	0.9	1	0.01559873	0.980232452	0.00803513	0.027767065	0	0.884130243	0.859797815	0.877676139
5.5	0.727603787	0.006946857	0	0.80562039	0.925349779	1	0.026857571	0.986387722	0.014085839	0.040914443	0.000431332	0.935240673	0.888377676	0.917986862
6	0.872772141	0.007451694	0	0.893905403	0.952040348	1	0.055083144	0.999086174	0.050133435	0.090181163	0.000258978	0.977390975	0.926654916	0.965708282
6.5	0.969441903	0.012597741	8.60E-05	0.962579321	0.966216837	1	0.105173394	0.999268605	0.103228916	0.234117525	0.000259605	0.993780626	0.95669746	0.991643977
7	0.996250572	0.008784136	0	0.964149362	0.965924705	1	0.21485462	1	0.162411626	0.358654652	0.001908231	0.997565771	0.982038744	0.997113056
7.5	0.99890411	0.011550578	0.001984983	0.968901756	0.9770558	1	0.42505978	0.997444323	0.275737449	0.496734059	0.004908406	0.99925761	0.995711755	0.999907037
8	0.99790031	0.028939474	0.000866326	0.981490051	0.989290618	1	0.697504222	0.995705802	0.373381365	0.549896266	0.006672598	0.999722531	0.996469714	0.998695612
8.5	1	0.047724652	0.003739456	0.986431604	0.998627881	1	0.823210108	0.999634737	0.501698205	0.581248686	0.014972207	0.99981514	0.997116815	0.999443775
8.75	1	0.065969429	0.015070999	0.993540052	0.999633733	1	0.895185185	1	0.532348047	0.640953571	0.01384643	1	0.999070632	0.999814969
9	1	0.110525375	0.027865129	0.994173141	0.999543087	1	0.936262319	1	0.613680529	0.698739977	0.017999276	1	0.999814368	1
9.5	1	0.255321068	0.038532594	0.998338564	0.998268635	1	0.969356768	1	0.74309999	0.771845673	0.029880299	0.999539213	0.999628942	1
10	1	0.443919287	0.046309315	0.999540526	0.999452355	1	0.991004089	1	0.816505874	0.862949938	0.059602045	1	0.99990786	1
10.25	1	0.516067365	0.046159298	0.999815957	0.999726477	1	0.997460317	1	0.872540714	0.904526749	0.100653836	1	1	1
10.5	1	0.604191344	0.075727983	1	1	1	0.998827984	1	0.893621013	0.936398623	0.123228934	1	1	0.99990824
11	1	0.757856494	0.170184225	1	1	1	0.998826185	1	0.94416759	0.965173648	0.248777682	1	1	1
11.5	1	0.892427081	0.316108597	1	1	1	0.996476646	1	0.973308958	0.986041586	0.481470869	1	1	1
