# Supplementary material for: Energy coupling and stoichiometry of Zn2+/H+ antiport by the prokaryotic cation diffusion facilitator YiiP
Source: eLife. 2023 Oct 31;12:RP87167. doi: 10.7554/eLife.87167 (PMC10617992; doi:10.7554/eLife.87167)
Supplement: Figure 4—figure supplement 5—source data 1. [file elife-87167-fig4-figsupp5-data1.csv]

	pH	s0	s1	s2	s3	s4	s5	s6	s7	s8	s9	s10	s11	s12	s13	s14	s15
0	1.5	0.0	0.0	0.0	0.013280587736648771	0.0	0.0003955919751342187	0.0	0.1255156823961571	0.0	0.001921446736366205	0.0	0.15122916077988133	0.0	0.007798813224074597	0.0	0.6998587171517378
1	1.75	0.0	0.0005734931467568962	0.0	0.022022136835464817	0.0	0.0033836095658656877	0.0	0.13465619085851924	0.0	0.005390835579514825	0.0	0.2260709984515685	0.0	0.0121580547112462	0.0	0.5957446808510638
2	2.0	0.0	0.0025705439037214464	0.0	0.047204533504702925	0.0	0.004147923117368698	0.0	0.13898463515803003	0.0	0.01209324063796226	0.0	0.3130805631828007	0.0	0.022375416252848047	0.0	0.45954314424256587
3	2.5	0.0	0.006568239944199024	0.0	0.06719367588932806	0.0	0.008951406649616368	0.0	0.09956986747268078	0.0	0.035514996512438966	0.0	0.28429435015112764	0.0	0.06457800511508952	0.0	0.43332945826551966
4	2.75	0.0	0.012089911379775808	0.0	0.0939609131991314	0.0	0.015552555901167909	0.0	0.1380949586243324	0.0	0.03785433417454076	0.0	0.2871060508245789	0.0001173777803861729	0.08005164622336991	5.868889019308645e-05	0.3351135630025236
5	3.0	0.0	0.03592778574844572	0.0	0.13492348158775705	0.0	0.013868962219033954	0.00041846006695361073	0.11250597800095648	0.0	0.07538259206121473	0.0	0.30392156862745096	0.0	0.08805595408895266	0.00029890004782400767	0.23469631755141082
6	3.25	6.156119182467373e-05	0.0590371829598621	0.0002462447672986949	0.174341295247476	0.0	0.020376754493967003	0.0	0.15211770499876878	0.0	0.09098744151686777	0.0	0.2769638020192071	0.00012312238364934746	0.08907904457030288	0.0005540507264220635	0.13611179512435362
7	3.5	0.00012430853378084405	0.06656721983964199	0.00012430853378084405	0.2534029461122506	0.00012430853378084405	0.026229100627758097	0.0	0.12107651190254211	0.0	0.0959661880788116	0.00012430853378084405	0.24724967369009881	0.0002486170675616881	0.09752004475107216	0.0006836969357946423	0.0905587668593449
8	3.75	0.0005608524957936063	0.06001121704991587	0.00012463388795413472	0.2554994703059762	0.00031158471988533684	0.04947965351779149	0.0	0.1080575808562348	0.0	0.09503333956502773	0.00012463388795413472	0.2593008038885773	0.0	0.10512868448931265	0.0003739016638624042	0.06599364367171434
9	4.0	0.0	0.08387983261507713	6.245706077072014e-05	0.2308412966085816	0.00037474236462432077	0.06077072012991069	0.0	0.10555243270251702	0.0004371994253950409	0.12578852039223035	0.00012491412154144027	0.25644869152457683	0.0	0.09568421710074324	0.00012491412154144027	0.039910061832490164
10	4.25	6.360109393881575e-05	0.10945748266870191	0.0004452076575717102	0.2476626597977485	0.0020988360999809196	0.09304840043248744	0.0	0.10519620937480124	0.0001272021878776315	0.14876295872289003	0.000508808751510526	0.22362144628887617	0.0	0.04324874387839471	0.0	0.02575844304522038
11	4.5	0.00038538120624317555	0.14387565033078553	0.00025692080416211705	0.2844755604085041	0.0017984456291348192	0.08234311773395851	0.00025692080416211705	0.09904297000449612	0.00038538120624317555	0.14779369259425781	0.0005780718093647633	0.1914702293018177	0.0	0.02248057036418524	0.0	0.02485708780268482
12	4.75	0.0011023213590973934	0.209635585527169	0.0020749578524186228	0.32304500064842434	0.0007781091946569835	0.042471793541693684	0.0008429516275450655	0.07657891324082479	0.00038905459732849174	0.14900791077681236	0.00012968486577616392	0.15095318376345482	0.0	0.015108286862923096	0.0	0.027882246141875244
13	5.0	0.0022199007573779055	0.26932619482893705	0.0024157743536171324	0.34552102376599636	0.0013711151736745886	0.03943588404283103	0.0011099503786889528	0.0632671715852703	0.0005223295899712719	0.14448942282580307	0.00019587359623922696	0.09989553408200574	0.00019587359623922696	0.013711151736745886	0.0	0.016322799686602246
14	5.25	0.0024446646845061116	0.3781962338949455	0.002642880740006607	0.3169474727452924	0.0015857284440039642	0.03713247439709283	0.0005946481665014867	0.04255037991410637	0.0014535844070036339	0.1351172778328378	0.0007928642220019821	0.06475057813016187	6.607201850016519e-05	0.00918401057152296	0.0	0.006541129831516353
15	5.5	0.00563997080485701	0.4462212195607458	0.0019905779311260034	0.3138477871408666	0.0013270519540840024	0.03529958197863446	0.0003317629885210006	0.022029062437794438	0.0005971733793378011	0.12786145577599364	0.0007298785747462014	0.037953685886802466	6.635259770420012e-05	0.0025213987127596046	0.0	0.0035830402760268065
16	6.0	0.019496561394137676	0.5819590038058357	0.007010749816385124	0.2592642051145089	0.003739066568738733	0.02911130399946585	0.0018027642384990318	0.008079054550310476	0.0008012285504440141	0.07972224076917941	0.0004673833210923416	0.0066101355411631165	0.00013353809174066904	0.0018027642384990318	0.0	0.0
17	6.5	0.048383885312271856	0.6963562753036437	0.017919957523063648	0.1774739496913785	0.0015265149001128294	0.018185438375257185	0.0009955531957257582	0.005110506404725559	0.0012610340479192938	0.02648171500630517	6.637021304838388e-05	0.004911395765580408	0.0	0.0013274042609676777	0.0	0.0
18	7.0	0.12571428571428572	0.6909579831932773	0.03280672268907563	0.09949579831932773	0.010084033613445379	0.012907563025210084	0.0010756302521008404	0.00047058823529411766	0.0035630252100840335	0.021848739495798318	6.722689075630252e-05	0.00047058823529411766	0.0	0.0005378151260504202	0.0	0.0
19	7.5	0.2858010118043845	0.5808431703204047	0.02779089376053963	0.062192242833052275	0.010860033726812816	0.005261382799325464	0.0003372681281618887	0.0003372681281618887	0.01193929173693086	0.014569983136593592	0.0	0.0	0.0	6.745362563237774e-05	0.0	0.0
20	8.0	0.4536575642814431	0.47624742542023785	0.022589861138794763	0.0281044448873829	0.005514583748588133	0.0027905122583217062	0.00019932230416583617	0.0	0.0075078067902464955	0.0032555976347086574	6.644076805527871e-05	0.0	0.0	6.644076805527871e-05	0.0	0.0
21	8.5	0.6875	0.2719045120671563	0.017313746065057714	0.008328961175236096	0.006558237145855194	0.001180482686253935	0.0	0.0	0.006951731374606506	0.00026232948583420777	0.0	0.0	0.0	0.0	0.0	0.0
22	8.75	0.7709024660029931	0.20456763615069296	0.010150302557095451	0.003773830437894463	0.005921009824972347	0.0006506604203266315	6.506604203266315e-05	0.0	0.003903962521959789	6.506604203266315e-05	0.0	0.0	0.0	0.0	0.0	0.0
23	9.0	0.8307791371538957	0.1481648422408242	0.009658725048293626	0.0025756600128783	0.004764971023824855	0.000643915003219575	0.0	0.0	0.0032839665164198324	0.000128783000643915	0.0	0.0	0.0	0.0	0.0	0.0
24	9.5	0.9305053579354512	0.05858854860186418	0.005326231691078562	0.0012681504026377528	0.003043560966330607	0.0006340752013188764	0.0	0.0	0.0006340752013188764	0.0	0.0	0.0	0.0	0.0	0.0	0.0
25	10.0	0.9601103863522328	0.030920722528850978	0.006271951831409934	0.0013171098845960864	0.0011916708479678877	0.0	0.0	0.0	0.00018815855494229804	0.0	0.0	0.0	0.0	0.0	0.0	0.0
26	10.25	0.9731803155990769	0.02002120626208445	0.005363936880184619	0.0011850558223663694	0.00018711407721574253	0.0	0.0	0.0	6.237135907191417e-05	0.0	0.0	0.0	0.0	0.0	0.0	0.0
27	10.5	0.9833127317676144	0.013040791100123609	0.0031520395550061805	0.0004944375772558715	0.0	0.0	0.0	0.0	0.0	0.0	0.0	0.0	0.0	0.0	0.0	0.0
28	11.0	0.9871525633106856	0.006670784434836319	0.005682520074119827	0.0004941321803582458	0.0	0.0	0.0	0.0	0.0	0.0	0.0	0.0	0.0	0.0	0.0	0.0
29	11.5	0.9907650908201333	0.007400159011681243	0.0017735918292459177	6.115833893951441e-05	0.0	0.0	0.0	0.0	0.0	0.0	0.0	0.0	0.0	0.0	0.0	0.0
