# Supplementary material for: Energy coupling and stoichiometry of Zn2+/H+ antiport by the prokaryotic cation diffusion facilitator YiiP
Source: eLife. 2023 Oct 31;12:RP87167. doi: 10.7554/eLife.87167 (PMC10617992; doi:10.7554/eLife.87167)
Supplement: Figure 4—figure supplement 5—source data 2. [file elife-87167-fig4-figsupp5-data2.csv]

state1	state2	value	std
S0	S1	8.002629257	0.034105519
S0	S2	6.513976053	0.885100117
S0	S4	3.396044418	1.093667099
S0	S8	4.945921394	1.085383699
S1	S3	5.252150786	0.047001003
S1	S5	4.185816397	1.020449809
S1	S9	4.94980501	0.06389563
S2	S3	6.74080399	0.901806669
S2	S6	2.1335966	1.403026952
S2	S10	3.629119058	1.126554745
S4	S5	8.792401236	1.162388328
S4	S6	5.251528235	1.296567911
S4	S12	4.186311889	1.09922596
S8	S9	8.006512873	1.091409124
S8	S10	5.197173716	1.211771021
S8	S12	2.636434912	0.992558627
S3	S7	3.60026812	0.077983339
S3	S11	3.875096586	0.060728147
S5	S7	4.666602509	1.030283874
S5	S13	4.16023382	0.786466234
S6	S7	8.20747551	1.262245472
S6	S14	3.976848566	1.118516866
S9	S11	4.177442362	0.076162242
S9	S13	3.396245207	0.922277132
S10	S11	6.986781518	1.150420051
S10	S14	2.481326109	1.06568801
S12	S13	8.766323167	1.121780375
S12	S14	5.042064912	1.085466675
S7	S15	2.743110988	0.063586887
S11	S15	2.468282523	0.055571516
S13	S15	3.249479677	0.892719627
S14	S15	6.973737932	1.072392266
