# Supplementary material for: Energy coupling and stoichiometry of Zn2+/H+ antiport by the prokaryotic cation diffusion facilitator YiiP
Source: eLife. 2023 Oct 31;12:RP87167. doi: 10.7554/eLife.87167 (PMC10617992; doi:10.7554/eLife.87167)
Supplement: Figure 4—figure supplement 5—source data 3. — Panels B-F were derived from these data using Multibind package available at https://github.com/Becksteinlab/yiip_analysis, (Fan, 2023). [file elife-87167-fig4-figsupp5-data3.csv]

state1	state2	value	std
pKa
S0	S1	5.877279792	0.405835192
S0	S2	4.703151576	0.433669538
S0	S4	4.51689656	0.509602311
S0	S8	5.735211622	0.471197321
S1	S3	9.753397139	0.424860017
S1	S5	4.899955926	0.495803424
S1	S9	5.673135382	0.537529659
S2	S3	10.92752536	0.424292684
S2	S6	3.831741532	0.563409645
S2	S10	4.142607153	0.51623319
S4	S5	6.260339158	0.587754191
S4	S6	4.017996548	0.597988774
S4	S12	4.251781921	0.459079994
S8	S9	5.815203553	0.541742436
S8	S10	3.110547107	0.477799311
S8	S12	3.033466859	0.494107624
S3	S7	6.558398686	0.079517286
S3	S11	4.292479208	0.53736158
S5	S7	11.4118399	0.432062945
S5	S13	5.48360765	0.529061279
S6	S7	13.65418251	0.497270535
S6	S14	3.530042133	0.522157977
S9	S11	8.372740965	0.561224617
S9	S13	4.710428194	0.512885637
S10	S11	11.07739741	0.465521105
S10	S14	3.219176512	0.542013576
S12	S13	7.492164888	0.44110213
S12	S14	3.29625676	0.498824381
S7	S15	-0.2335266	0.426068802
S11	S15	2.032392878	0.535242214
S13	S15	5.694705649	0.464469633
S14	S15	9.890613777	0.495144459
S0Zn	S1Zn	0.095011702	0.364280268
S0Zn	S2Zn	2.131066952	0.384609813
S0Zn	S4Zn	1.543217665	0.490002692
S0Zn	S8Zn	3.01302554	0.455699685
S1Zn	S3Zn	5.914350632	0.445722293
S1Zn	S5Zn	6.731659816	0.483410754
S1Zn	S9Zn	7.257333765	0.421389584
S2Zn	S3Zn	3.878295382	0.446161734
S2Zn	S6Zn	5.448459735	0.445241928
S2Zn	S10Zn	4.691662967	0.410412158
S4Zn	S5Zn	5.283453853	0.533655372
S4Zn	S6Zn	6.036309022	0.475633411
S4Zn	S12Zn	4.304721122	0.499012679
S8Zn	S9Zn	4.339319926	0.506179009
S8Zn	S10Zn	3.809704379	0.447976061
S8Zn	S12Zn	2.834913247	0.473606104
S3Zn	S7Zn	6.875571454	0.481504996
S3Zn	S11Zn	4.644173208	0.476122192
S5Zn	S7Zn	6.05826227	0.515400938
S5Zn	S13Zn	3.431450591	0.587012996
S6Zn	S7Zn	5.3054071	0.555617691
S6Zn	S14Zn	0.845778221	0.544717124
S9Zn	S11Zn	3.301190075	0.517601119
S9Zn	S13Zn	2.905776642	0.581140837
S10Zn	S11Zn	3.830805622	0.503501019
S10Zn	S14Zn	1.60257499	0.539013016
S12Zn	S13Zn	4.410183322	0.454827001
S12Zn	S14Zn	2.577366122	0.523981921
S7Zn	S15Zn	0.384273323	0.513121738
S11Zn	S15Zn	2.615671569	0.456485989
S13Zn	S15Zn	3.011085002	0.537659145
S14Zn	S15Zn	4.843902202	0.530357511
binding free energies (kT)
S0	S0Zn	-21.32709245	0.619633684
S1	S1Zn	-8.012928143	0.741446707
S2	S2Zn	-15.40464874	0.820774075
S3	S3Zn	0.826803116	0.784818192
S4	S4Zn	-14.47994376	0.872689657
S5	S5Zn	-12.23058221	0.774570416
S6	S6Zn	-19.12727997	0.808281649
S7	S7Zn	0.096485829	0.781738896
S8	S8Zn	-15.05902736	0.708790125
S9	S9Zn	-11.66067972	0.838040895
S10	S10Zn	-16.66889647	0.71088066
S11	S11Zn	0.016997755	0.880740512
S12	S12Zn	-14.60184077	0.74302034
S13	S13Zn	-7.505315961	0.860090523
S14	S14Zn	-12.9465339	0.718887181
S15	S15Zn	-1.326051063	0.900380898
