# Supplementary material for: Energy coupling and stoichiometry of Zn2+/H+ antiport by the prokaryotic cation diffusion facilitator YiiP
Source: eLife. 2023 Oct 31;12:RP87167. doi: 10.7554/eLife.87167 (PMC10617992; doi:10.7554/eLife.87167)
Supplement: Figure 4—figure supplement 6—source data 1. [file elife-87167-fig4-figsupp6-data1.csv]

	pH	s0	s1	s2	s3	s4	s5	s6	s7
0	1.5	0.0	0.0001163399453202257	0.0	0.2873014949682974	0.0	0.0006398696992612413	0.0	0.7119422953871212
1	1.75	0.0	0.00011797322007904206	0.0	0.44269450834660534	0.0	5.898661003952103e-05	5.898661003952103e-05	0.5570695452132366
2	2.0	0.0	5.9368321063880314e-05	0.0	0.525825219662788	0.0	0.0	0.0	0.4741154120161482
3	2.5	0.0	0.00011858879335902757	0.00017788319003854134	0.5308627334716869	0.0	0.0002964719833975689	0.00011858879335902757	0.46842573376815894
4	2.75	0.0	0.002100588164686112	0.00030008402352658747	0.6317969031328772	0.0	0.00012003360941063497	0.00018005041411595248	0.3655023406553835
5	3.0	0.0	0.0013288233872916163	0.0006040106305870984	0.8308166223725537	0.0	0.0003020053152935492	0.00012080212611741966	0.16682773616815655
6	3.25	0.0	0.0017524776408025138	0.0009064539521392314	0.864334058496495	0.0	0.00012086052695189751	0.00024172105390379503	0.13264442832970752
7	3.5	0.0	0.000605363520794237	0.0023609177310975242	0.9306858768690599	0.0	0.00024214540831769477	0.0001816090562382711	0.0659240874144924
8	3.75	0.0	0.0028167289204580246	0.0034290612944706386	0.9341130365562428	0.0	0.00024493294960504564	6.123323740126141e-05	0.0593350070418223
9	4.0	0.0	0.0023307163886162907	0.003986751717369971	0.9582924435721295	0.0	0.0001226692836113837	6.133464180569185e-05	0.03520608439646712
10	4.25	0.0	0.0037600936941379524	0.002773839610429637	0.974850520865438	0.0	0.0	0.0	0.018615545829994452
11	4.5	0.0	0.010709838107098382	0.004794520547945206	0.9720423412204234	0.0	0.0	0.0	0.012453300124533
12	4.75	6.287726358148894e-05	0.014587525150905433	0.01295271629778672	0.9670523138832998	0.0	0.0	0.0	0.00534456740442656
13	5.0	0.00044705581811214717	0.015199897815813003	0.026887214203601992	0.9552944181887852	0.0	0.00012773023374632777	0.0	0.0020436837399412443
14	5.25	0.0005125248254212314	0.024408994810686143	0.03709398423986162	0.9378563649176757	0.0	0.0	0.0	0.00012813120635530784
15	5.5	0.0007827788649706458	0.04050880626223092	0.04396607958251794	0.9146771037181997	0.0	0.0	0.0	6.523157208088715e-05
16	6.0	0.0022826451829472977	0.09184290030211481	0.06680093991272239	0.8371936891574354	0.0	0.0	0.0004028197381671702	0.0014770057066129574
17	6.5	0.002389567829589677	0.13251860449238753	0.12514508090393936	0.7399467467740835	0.0	0.0	0.0	0.0
18	7.0	0.027783776002303317	0.16123227524652703	0.2176635715828115	0.5932483984740516	0.0	0.0	0.0	7.197869430648528e-05
19	7.5	0.08906418070993187	0.2738615991394765	0.27400501972032987	0.36306920043026175	0.0	0.0	0.0	0.0
20	8.0	0.2212881162724423	0.3012966657167284	0.2593331433456825	0.21808207466514676	0.0	0.0	0.0	0.0
21	8.5	0.38916576381365114	0.25872156013001085	0.20859516070783676	0.14351751534850127	0.0	0.0	0.0	0.0
22	8.75	0.4610375670840787	0.2427906976744186	0.20665474060822897	0.0895169946332737	0.0	0.0	0.0	0.0
23	9.0	0.5206506364922207	0.22857142857142856	0.19087694483734088	0.0599009900990099	0.0	0.0	0.0	0.0
24	9.5	0.6610004180019506	0.19012122056569597	0.12804793089034416	0.020830430542009195	0.0	0.0	0.0	0.0
25	10.0	0.7931913720625732	0.10660877954655089	0.08510784921783475	0.01509199917304114	0.0	0.0	0.0	0.0
26	10.25	0.8693470698421194	0.06308536259031308	0.0575996788868076	0.009967888680759969	0.0	0.0	0.0	0.0
27	10.5	0.9036856973917614	0.03935352473556271	0.04993101635897773	0.00702976151369818	0.0	0.0	0.0	0.0
28	11.0	0.9432289341072909	0.023537666645404094	0.03093704152580213	0.0022963577215028385	0.0	0.0	0.0	0.0
29	11.5	0.9730168644597127	0.011930043722673329	0.014303560274828233	0.0007495315427857589	0.0	0.0	0.0	0.0
