# Supplementary material for: Energy coupling and stoichiometry of Zn2+/H+ antiport by the prokaryotic cation diffusion facilitator YiiP
Source: eLife. 2023 Oct 31;12:RP87167. doi: 10.7554/eLife.87167 (PMC10617992; doi:10.7554/eLife.87167)
Supplement: Figure 4—figure supplement 6—source data 2. [file elife-87167-fig4-figsupp6-data2.csv]

state1	state2	value	std
S0	S1	8.555939405	0.031290657
S0	S2	8.519392494	0.02627897
S0	S4	1.958302002	0.29977416
S1	S3	7.509887792	0.035122526
S1	S5	1.79066165	0.283141464
S2	S3	7.546434703	0.036690005
S2	S6	1.514687607	0.312859331
S4	S5	8.388299053	0.335029962
S4	S6	8.0757781	0.345689308
S3	S7	2.146043864	0.023153271
S5	S7	7.865270007	0.280403581
S6	S7	8.17779096	0.313182197
