# Supplementary material for: Energy coupling and stoichiometry of Zn2+/H+ antiport by the prokaryotic cation diffusion facilitator YiiP
Source: eLife. 2023 Oct 31;12:RP87167. doi: 10.7554/eLife.87167 (PMC10617992; doi:10.7554/eLife.87167)
Supplement: Figure 4—figure supplement 6—source data 3. — Panels B-G were derived from these data using Multibind package available at https://github.com/Becksteinlab/yiip_analysis, (Fan, 2023). [file elife-87167-fig4-figsupp6-data3.csv]

state1	state2	value	variance	ligand	standard_state
pKa
S0	S1	12.08111165	0.612513456	H+	1
S0	S2	12.05814784	0.614056671	H+	1
S0	S4	4.260985833	0.75215524	H+	1
S1	S3	5.908636836	0.471902688	H+	1
S1	S5	-0.017917564	0.660717966	H+	1
S2	S3	5.931600649	0.459883519	H+	1
S2	S6	-1.483616041	0.69810886	H+	1
S4	S5	7.802208257	0.623930205	H+	1
S4	S6	6.313545967	0.674093239	H+	1
S3	S7	1.119211443	0.566166494	H+	1
S5	S7	7.045765843	0.683525213	H+	1
S6	S7	8.534428133	0.577133401	H+	1
S0Zn	S1Zn	5.509757854	0.393955103	H+	1
S0Zn	S2Zn	5.505657172	0.389078428	H+	1
S0Zn	S4Zn	0.232479928	0.711404328	H+	1
S1Zn	S3Zn	5.30270918	0.110130561	H+	1
S1Zn	S5Zn	0.939964961	0.562454184	H+	1
S2Zn	S3Zn	5.306809862	0.151438204	H+	1
S2Zn	S6Zn	1.754671596	0.599169049	H+	1
S4Zn	S5Zn	6.217242886	0.589932814	H+	1
S4Zn	S6Zn	7.02784884	0.648902749	H+	1
S3Zn	S7Zn	0.763917396	0.552312951	H+	1
S5Zn	S7Zn	5.126661615	0.751678743	H+	1
S6Zn	S7Zn	4.316055662	0.579871569	H+	1
binding free energies (kT)
S0	S0Zn	-26.0426765	1.438352564	Zn	1
S1	S1Zn	-10.9115752	0.88122728	Zn	1
S2	S2Zn	-10.95500916	0.835754553	Zn	1
S3	S3Zn	-9.516375212	0.244644279	Zn	1
S4	S4Zn	-16.76669886	1.066821187	Zn	1
S5	S5Zn	-13.11718122	0.890361039	Zn	1
S6	S6Zn	-18.411442	1.01954027	Zn	1
S7	S7Zn	-8.698280435	0.792947454	Zn	1
