# Supplementary material for: Energy coupling and stoichiometry of Zn2+/H+ antiport by the prokaryotic cation diffusion facilitator YiiP
Source: eLife. 2023 Oct 31;12:RP87167. doi: 10.7554/eLife.87167 (PMC10617992; doi:10.7554/eLife.87167)
Supplement: Figure 4—source data 1. [file elife-87167-fig4-data1.xlsx]

## Sheet: Fb pH 7.4
5e-12	-0.103309	0.0294348
1e-11	-0.0886767	0.0592574
2.2e-11	-0.0477707	0.0407081
4.4e-11	-0.0444588	0.0456104
8.8e-11	-0.0213412	0.0303858
1.8e-10	0.0638292	0.0173953
3.71e-10	0.122767	0.0178127
7.92e-10	0.230143	0.0440162
1.8e-09	0.315006	0.0267973
5.4e-09	0.487169	0.029897
1.657e-07	0.943778	0.0322271
3.92e-06	0.92585	0.217165
1.4427e-05	0.987281	0.0454627
2.567e-05	0.961458	0.0439218
3.7576e-05	1.03985	0.0578319
5.0043e-05	1.12248	0.0246519

## Sheet: Fb pH 7.0
1.3e-11	0.0362214	0.0289122
2.7e-11	-0.0249522	0.0163646
5.4e-11	0.00271958	0.0278495
1.1e-10	0.0322994	0.105856
2.2e-10	0.0767146	0.0328882
4.5e-10	-0.0364349	0.040873
9.2e-10	-0.0573926	0.0209743
2e-09	0.0449267	0.0380443
4.6e-09	0.206561	0.0506068
1.35e-08	0.34518	0.0234761
4e-07	0.92981	0.0608999
4.295e-06	0.977387	0.0553045
1.4542e-05	1.00739	0.139761
2.5737e-05	0.990745	0.0654345
3.7576e-05	1.03182	0.0693596
5.0043e-05	1.01281	0.0750523

## Sheet: Fb pH 6.5
2.62e-09	-0.0472324	0.0599862
5.25e-09	-0.0759861	0.0754549
1.05e-08	0.0294587	0.0338024
2.1e-08	0.0230558	0.0601347
4.21e-08	0.0497764	0.102576
8.43e-08	0.191784	0.0630943
1.694e-07	0.227836	0.0048141
3.419e-07	0.447667	0.0487371
6.967e-07	0.466119	0.0369772
1.448e-06	0.663351	0.115939
3.14e-06	0.726223	0.024275
7.535e-06	0.796186	0.0525304
2.4234e-05	0.994308	0.0447388
0.000171913	0.970375	0.0541477
0.000761421	0.974643	0.0785827
0.002	1.20467	0.0265721

## Sheet: Fb pH 6.0
3.43e-09	-0.0579241	0.0715871
6.85e-09	-0.0877361	0.106818
1.37e-08	-0.0992295	0.0488353
2.74e-08	0.0303336	0.0854298
5.49e-08	0.0953475	0.115043
1.1e-07	0.0388152	0.111896
2.21e-07	0.105226	0.160161
4.46e-07	0.161889	0.0673267
9.09e-07	0.115943	0.159542
1.888e-06	0.204625	0.0229456
4.085e-06	0.386065	0.0682623
9.739e-06	0.614732	0.167011
3.0419e-05	0.837913	0.19137
0.000182139	0.971402	0.0689746
0.000764903	0.890782	0.0693496
0.002	1.09255	0.292842

## Sheet: Fb pH 5.6
1.04e-07	-0.0909543	0.0663281
2.09e-07	-0.0117352	0.0475958
4.2e-07	-0.0221066	0.0368576
8.5e-07	0.00883039	0.0558837
1.739e-06	0.067663	0.0521583
3.637e-06	0.00403487	0.0660925
7.997e-06	-0.0551072	0.11496
1.9797e-05	0.127709	0.0067593
6.7098e-05	0.334962	0.0150106
0.000331028	0.464343	0.0560665
0.0010789	0.721329	0.0471323
0.0026319	0.84971	0.0121071
0.0057532	1.04492	0.0673312
