# Supplementary material for: Energy coupling and stoichiometry of Zn2+/H+ antiport by the prokaryotic cation diffusion facilitator YiiP
Source: eLife. 2023 Oct 31;12:RP87167. doi: 10.7554/eLife.87167 (PMC10617992; doi:10.7554/eLife.87167)
Supplement: Figure 4—source data 2. [file elife-87167-fig4-data2.xlsx]

## Sheet: Fb pH 7.0
2.4e-09	-0.101017	0.0585582
4.8e-09	0.0921559	0.159774
9.6e-09	-0.103934	0.0898574
1.92e-08	-0.11144	0.167956
3.84e-08	0.060747	0.0740121
7.7e-08	0.0927773	0.0695594
1.55e-07	0.287657	0.106868
3.12e-07	0.345076	0.0192443
6.36e-07	0.276064	0.0976303
1.323e-06	0.351422	0.299399
2.87e-06	0.834349	0.128304
6.9e-06	0.72655	0.177316
2.2391e-05	1.02566	0.143397

## Sheet: Fb pH 6.5
2.62e-09	-0.0924101	0.133777
5.25e-09	-0.0559652	0.0630651
1.05e-08	-0.0660001	0.0466959
2.1e-08	0.00123933	0.0417892
4.21e-08	0.0375249	0.0269097
8.43e-08	0.0654517	0.107532
1.694e-07	0.097945	0.0469653
3.419e-07	0.0384617	0.153959
6.967e-07	0.186432	0.137209
1.448e-06	0.209657	0.0263894
3.14e-06	0.426334	0.0813671
7.535e-06	0.506067	0.0979885
2.4234e-05	0.743175	0.176313
0.000171913	0.819574	0.0945723
0.000761421	1.18478	0.0982269

## Sheet: Fb pH 6.0
3.43e-09	-0.250484	0.14669
6.85e-09	-0.00493126	0.041915
1.37e-08	0.0259	0.02106
2.74e-08	0.0242217	0.0516617
5.49e-08	0.0735979	0.0171957
1.1e-07	0.114783	0.0814711
2.21e-07	0.0634251	0.120301
4.46e-07	0.22838	0.146775
9.09e-07	0.0977254	0.0587425
1.888e-06	0.160348	0.0277077
4.085e-06	0.334191	0.205615
9.739e-06	0.710051	0.0748819
3.0419e-05	0.977719	0.154186
0.000182139	0.782836	0.231271
0.000764903	0.98019	0.0844962
0.002	1.08349	0.0627442

## Sheet: Fb pH 5.6
5.2e-09	0.00217279	0.0370589
1.04e-08	-0.0111975	0.0258985
2.08e-08	0.0601004	0.0422244
4.17e-08	-0.000986451	0.0729617
8.34e-08	0.0151092	0.101662
1.672e-07	-0.0208453	0.0463342
3.359e-07	0.0242952	0.0451693
6.776e-07	0.00523438	0.0311946
1.379e-06	0.00367921	0.0217979
2.857e-06	0.081967	0.0272141
6.154e-06	0.201646	0.0582025
1.4483e-05	0.388148	0.100725
4.2845e-05	0.59192	0.0633801
0.000201771	0.840758	0.0322903
0.000772614	0.989538	0.0366725
0.002	0.999224	0.0943957
