# Supplementary material for: Energy coupling and stoichiometry of Zn2+/H+ antiport by the prokaryotic cation diffusion facilitator YiiP
Source: eLife. 2023 Oct 31;12:RP87167. doi: 10.7554/eLife.87167 (PMC10617992; doi:10.7554/eLife.87167)
Supplement: Figure 4—source data 3. [file elife-87167-fig4-data3.xlsx]

## Sheet: Fb pH 7.0
3e-10	0.072001	0.0926602
7e-10	0.13531	0.107909
1.5e-09	0.0282019	0.0337941
3.3e-09	-0.0195841	0.0996037
8.6e-09	0.0507022	0.0622683
4.28e-08	0.462149	0.0356872
5.34e-08	0.475406	0.0465931
6.98e-08	0.806557	0.165622
9.85e-08	0.855605	0.0656697
1.61e-07	0.87362	0.0553527
4e-07	0.897226	0.0821319
4.294e-06	0.885904	0.0360011
1.4934e-05	0.979171	0.0792611
2.571e-05	0.997042	0.170776
3.7558e-05	1.06819	0.0574242
5.0043e-05	0.980629	0.142196

## Sheet: Fb pH 6.5
2.5e-09	0.00955495	0.0630262
5e-09	-0.00754448	0.119157
1e-08	-0.0365675	0.077435
2e-08	0.0642044	0.0529838
4e-08	0.277989	0.0690712
8e-08	0.419151	0.0540118
1.62e-07	0.576664	0.0323223
3.27e-07	0.678334	0.0131944
6.67e-07	0.755945	0.040973
1.385e-06	0.841161	0.0636772
3.006e-06	0.964796	0.152828
7.219e-06	1.03945	0.0161524
2.3319e-05	1.10578	0.176205

## Sheet: Fb pH 6.0
2.5e-09	-0.0474151	0.0383
5e-09	0.0227755	0.0612025
1e-08	0.0315076	0.002237
2e-08	0.0122789	0.0916688
4e-08	-0.00299791	0.0236063
8e-08	-0.0381694	0.0606601
1.62e-07	0.0159473	0.0296612
3.27e-07	0.30221	0.0526164
6.67e-07	0.426871	0.0491959
1.385e-06	0.572005	0.0785266
3.006e-06	0.665232	0.0340967
7.219e-06	0.786806	0.0890259
2.3319e-05	0.958838	0.0399183
0.000170366	1.11254	0.0514627

## Sheet: Fb pH 5.6
5.2e-09	-0.0566228	0.056104
1.04e-08	-0.023687	0.0817907
2.08e-08	-0.0371188	0.138554
4.17e-08	0.0252997	0.0277357
8.34e-08	0.0402636	0.0348105
1.672e-07	0.00617894	0.0301467
3.359e-07	0.0531428	0.06845
6.776e-07	0.0167888	0.0294493
1.379e-06	0.21023	0.0376597
2.857e-06	0.330203	0.0638571
6.154e-06	0.436831	0.018738
1.4483e-05	0.584361	0.0408129
4.2845e-05	0.721877	0.0159244
0.000201771	0.940277	0.0174403
0.000772614	1.04375	0.0552561
0.002	1.05033	0.0188004
